# Supplementary material for: A Comprehensive Technoeconomic and Environmental Evaluation of a Hybrid Renewable Energy System for a Smart Farm in South Korea
Source: Hindawi journal article supplement (doi:10.1155/2023/4951589), 2023-07-14
Supplement: f1 [file 4951589.f1.pdf]

| Year | Month | Day | Hour | Dew Point | DHI (W/m <sup>2</sup> ) | DNI (W/m <sup>2</sup> ) | GHI (W/m <sup>2</sup> ) | Pressure (kPa) | Temperature (°C) | Wind Direction | Wind Speed (m/s) |
|------|-------|-----|------|-----------|-------------------------|-------------------------|-------------------------|----------------|------------------|----------------|------------------|
| 2020 | 1     | 1   | 0    | -3.9      | 0                       | 0                       | 0                       | 1013           | -1.9             | 338            | 2.7              |
| 2020 | 1     | 1   | 1    | -4.7      | 0                       | 0                       | 0                       | 1013           | -3.2             | 351            | 2.4              |
| 2020 | 1     | 1   | 2    | -5.4      | 0                       | 0                       | 0                       | 1014           | -4.2             | 1              | 2.4              |
| 2020 | 1     | 1   | 3    | -6.1      | 0                       | 0                       | 0                       | 1014           | -4.9             | 5              | 2.3              |
| 2020 | 1     | 1   | 4    | -6.5      | 0                       | 0                       | 0                       | 1014           | -5.2             | 6              | 2.2              |
| 2020 | 1     | 1   | 5    | -6.7      | 0                       | 0                       | 0                       | 1014           | -5.1             | 6              | 2.1              |
| 2020 | 1     | 1   | 6    | -6.5      | 0                       | 0                       | 0                       | 1014           | -4.6             | 4              | 1.9              |
| 2020 | 1     | 1   | 7    | -6.1      | 0                       | 0                       | 0                       | 1014           | -4               | 351            | 1.4              |
| 2020 | 1     | 1   | 8    | -5.2      | 18                      | 0                       | 18                      | 1014           | -2.4             | 327            | 1.2              |
| 2020 | 1     | 1   | 9    | -3.3      | 70                      | 541                     | 189                     | 1020           | 0.9              | 343            | 2.8              |
| 2020 | 1     | 1   | 10   | -2.9      | 142                     | 269                     | 240                     | 1020           | 2.6              | 332            | 3.2              |
| 2020 | 1     | 1   | 11   | -2.4      | 205                     | 177                     | 287                     | 1019           | 3.8              | 325            | 3.2              |
| 2020 | 1     | 1   | 12   | -2        | 223                     | 60                      | 254                     | 1018           | 4.7              | 317            | 3.3              |
| 2020 | 1     | 1   | 13   | -1.8      | 233                     | 83                      | 276                     | 1018           | 5.1              | 313            | 3.5              |
| 2020 | 1     | 1   | 14   | -1.7      | 213                     | 132                     | 277                     | 1018           | 4.9              | 311            | 3.5              |
| 2020 | 1     | 1   | 15   | -1.6      | 101                     | 705                     | 372                     | 1018           | 4.3              | 313            | 3.2              |
| 2020 | 1     | 1   | 16   | -0.9      | 77                      | 561                     | 217                     | 1018           | 2.2              | 317            | 1.8              |
| 2020 | 1     | 1   | 17   | -2.6      | 34                      | 238                     | 54                      | 1018           | -1.2             | 325            | 1.3              |
| 2020 | 1     | 1   | 18   | -2.9      | 0                       | 0                       | 0                       | 1018           | -1.8             | 333            | 1.2              |
| 2020 | 1     | 1   | 19   | -3.2      | 0                       | 0                       | 0                       | 1018           | -1.9             | 341            | 1.2              |
| 2020 | 1     | 1   | 20   | -3.4      | 0                       | 0                       | 0                       | 1018           | -2               | 349            | 1.2              |
| 2020 | 1     | 1   | 21   | -3.6      | 0                       | 0                       | 0                       | 1018           | -2               | 357            | 1.1              |
| 2020 | 1     | 1   | 22   | -3.9      | 0                       | 0                       | 0                       | 1018           | -2               | 4              | 1                |
| 2020 | 1     | 1   | 23   | -4.1      | 0                       | 0                       | 0                       | 1018           | -1.9             | 7              | 1                |
| 2020 | 1     | 2   | 0    | -4.3      | 0                       | 0                       | 0                       | 1018           | -1.8             | 9              | 0.9              |
| 2020 | 1     | 2   | 1    | -4.1      | 0                       | 0                       | 0                       | 1017           | -1.7             | 12             | 0.8              |
| 2020 | 1     | 2   | 2    | -4        | 0                       | 0                       | 0                       | 1017           | -1.7             | 16             | 0.8              |
| 2020 | 1     | 2   | 3    | -4        | 0                       | 0                       | 0                       | 1017           | -1.7             | 13             | 0.8              |
| 2020 | 1     | 2   | 4    | -4.3      | 0                       | 0                       | 0                       | 1017           | -1.9             | 5              | 0.9              |
| 2020 | 1     | 2   | 5    | -4.4      | 0                       | 0                       | 0                       | 1017           | -2.1             | 1              | 0.9              |
| 2020 | 1     | 2   | 6    | -4.4      | 0                       | 0                       | 0                       | 1017           | -2.2             | 9              | 0.9              |
| 2020 | 1     | 2   | 7    | -3.8      | 0                       | 0                       | 0                       | 1018           | -1.8             | 20             | 0.8              |
| 2020 | 1     | 2   | 8    | -3.1      | 17                      | 46                      | 19                      | 1018           | -0.3             | 18             | 1.1              |
| 2020 | 1     | 2   | 9    | -3.2      | 96                      | 291                     | 159                     | 1018           | 1.3              | 11             | 1.3              |
| 2020 | 1     | 2   | 10   | -2.2      | 149                     | 444                     | 310                     | 1018           | 3.7              | 338            | 1.9              |
| 2020 | 1     | 2   | 11   | -1.6      | 179                     | 537                     | 428                     | 1017           | 5.1              | 326            | 2.2              |
| 2020 | 1     | 2   | 12   | -1.2      | 191                     | 584                     | 495                     | 1016           | 6                | 319            | 2.5              |
| 2020 | 1     | 2   | 13   | -0.8      | 200                     | 568                     | 499                     | 1016           | 6.6              | 311            | 2.8              |
| 2020 | 1     | 2   | 14   | -0.4      | 186                     | 541                     | 446                     | 1015           | 6.7              | 309            | 2.9              |
| 2020 | 1     | 2   | 15   | 0.2       | 159                     | 465                     | 339                     | 1015           | 6                | 311            | 2.6              |
| 2020 | 1     | 2   | 16   | 0.6       | 110                     | 327                     | 193                     | 1016           | 3.1              | 318            | 1.3              |
| 2020 | 1     | 2   | 17   | -1.4      | 34                      | 104                     | 43                      | 1016           | 0                | 327            | 1.4              |
| 2020 | 1     | 2   | 18   | -1.7      | 0                       | 0                       | 0                       | 1016           | -0.5             | 333            | 1.4              |
| 2020 | 1     | 2   | 19   | -1.8      | 0                       | 0                       | 0                       | 1016           | -0.5             | 337            | 1.3              |
| 2020 | 1     | 2   | 20   | -1.8      | 0                       | 0                       | 0                       | 1016           | -0.5             | 336            | 1.2              |
| 2020 | 1     | 2   | 21   | -1.7      | 0                       | 0                       | 0                       | 1016           | -0.5             | 329            | 1.2              |
| 2020 | 1     | 2   | 22   | -1.5      | 0                       | 0                       | 0                       | 1016           | -0.7             | 324            | 1.2              |
| 2020 | 1     | 2   | 23   | -1.4      | 0                       | 0                       | 0                       | 1016           | -0.9             | 322            | 1.2              |

|      |   |   |    |      |     |     |     |      |      |     |     |
|------|---|---|----|------|-----|-----|-----|------|------|-----|-----|
| 2020 | 1 | 3 | 0  | -1.2 | 0   | 0   | 0   | 1016 | -1.1 | 323 | 1.2 |
| 2020 | 1 | 3 | 1  | -1.3 | 0   | 0   | 0   | 1015 | -1.3 | 326 | 1.2 |
| 2020 | 1 | 3 | 2  | -1.5 | 0   | 0   | 0   | 1015 | -1.5 | 330 | 1.2 |
| 2020 | 1 | 3 | 3  | -1.5 | 0   | 0   | 0   | 1015 | -1.5 | 334 | 1.3 |
| 2020 | 1 | 3 | 4  | -1.5 | 0   | 0   | 0   | 1014 | -1.5 | 338 | 1.3 |
| 2020 | 1 | 3 | 5  | -1.4 | 0   | 0   | 0   | 1014 | -1.4 | 341 | 1.3 |
| 2020 | 1 | 3 | 6  | -1.3 | 0   | 0   | 0   | 1014 | -1.3 | 343 | 1.4 |
| 2020 | 1 | 3 | 7  | -1.1 | 0   | 0   | 0   | 1015 | -1.1 | 347 | 1.3 |
| 2020 | 1 | 3 | 8  | 0.7  | 17  | 52  | 20  | 1015 | 1    | 349 | 1.2 |
| 2020 | 1 | 3 | 9  | 1.4  | 91  | 335 | 164 | 1015 | 3.6  | 346 | 2.3 |
| 2020 | 1 | 3 | 10 | 1.1  | 135 | 513 | 320 | 1015 | 5.2  | 331 | 2.9 |
| 2020 | 1 | 3 | 11 | 1    | 186 | 338 | 343 | 1015 | 6    | 323 | 3.3 |
| 2020 | 1 | 3 | 12 | 1    | 164 | 662 | 510 | 1014 | 6.6  | 321 | 3.4 |
| 2020 | 1 | 3 | 13 | 0.9  | 161 | 674 | 517 | 1013 | 6.9  | 323 | 3.5 |
| 2020 | 1 | 3 | 14 | 0.9  | 151 | 653 | 466 | 1013 | 6.9  | 324 | 3.4 |
| 2020 | 1 | 3 | 15 | 1.1  | 128 | 590 | 358 | 1012 | 6.3  | 327 | 2.8 |
| 2020 | 1 | 3 | 16 | 1.1  | 93  | 448 | 207 | 1012 | 3.4  | 329 | 1.4 |
| 2020 | 1 | 3 | 17 | -0.3 | 35  | 174 | 50  | 1013 | -0.1 | 330 | 1.4 |
| 2020 | 1 | 3 | 18 | -0.7 | 0   | 0   | 0   | 1013 | -0.7 | 334 | 1.4 |
| 2020 | 1 | 3 | 19 | -1   | 0   | 0   | 0   | 1014 | -1   | 340 | 1.4 |
| 2020 | 1 | 3 | 20 | -1.2 | 0   | 0   | 0   | 1014 | -1.2 | 345 | 1.3 |
| 2020 | 1 | 3 | 21 | -1.4 | 0   | 0   | 0   | 1014 | -1.4 | 345 | 1.3 |
| 2020 | 1 | 3 | 22 | -1.6 | 0   | 0   | 0   | 1014 | -1.6 | 352 | 1.3 |
| 2020 | 1 | 3 | 23 | -1.9 | 0   | 0   | 0   | 1013 | -1.9 | 353 | 1.2 |
| 2020 | 1 | 4 | 0  | -2   | 0   | 0   | 0   | 1013 | -2   | 352 | 1.2 |
| 2020 | 1 | 4 | 1  | -2.1 | 0   | 0   | 0   | 1013 | -2.1 | 355 | 1.2 |
| 2020 | 1 | 4 | 2  | -2.2 | 0   | 0   | 0   | 1012 | -2.2 | 357 | 1.2 |
| 2020 | 1 | 4 | 3  | -2.4 | 0   | 0   | 0   | 1012 | -2.4 | 355 | 1.2 |
| 2020 | 1 | 4 | 4  | -2.2 | 0   | 0   | 0   | 1012 | -2.2 | 352 | 1.2 |
| 2020 | 1 | 4 | 5  | -1.7 | 0   | 0   | 0   | 1012 | -1.7 | 349 | 1.1 |
| 2020 | 1 | 4 | 6  | -1.1 | 0   | 0   | 0   | 1013 | -1.1 | 346 | 1.2 |
| 2020 | 1 | 4 | 7  | -0.6 | 0   | 0   | 0   | 1013 | -0.5 | 349 | 1.1 |
| 2020 | 1 | 4 | 8  | -0.3 | 19  | 0   | 19  | 1013 | 0.4  | 349 | 1.3 |
| 2020 | 1 | 4 | 9  | 0.4  | 75  | 299 | 141 | 1013 | 1.7  | 341 | 1.5 |
| 2020 | 1 | 4 | 10 | 1.2  | 121 | 425 | 275 | 1013 | 4.3  | 324 | 2.5 |
| 2020 | 1 | 4 | 11 | 1.5  | 184 | 351 | 347 | 1013 | 6.3  | 320 | 3.4 |
| 2020 | 1 | 4 | 12 | 1.5  | 135 | 740 | 522 | 1012 | 7.4  | 318 | 4   |
| 2020 | 1 | 4 | 13 | 1.6  | 139 | 742 | 531 | 1012 | 8    | 319 | 4.1 |
| 2020 | 1 | 4 | 14 | 1.6  | 137 | 694 | 473 | 1011 | 7.9  | 321 | 4   |
| 2020 | 1 | 4 | 15 | 1.8  | 125 | 600 | 360 | 1012 | 7.2  | 323 | 3.6 |
| 2020 | 1 | 4 | 16 | 1.9  | 93  | 447 | 209 | 1012 | 4.2  | 325 | 1.8 |
| 2020 | 1 | 4 | 17 | 0.3  | 36  | 166 | 51  | 1013 | 0.3  | 330 | 1.5 |
| 2020 | 1 | 4 | 18 | -0.5 | 0   | 0   | 0   | 1013 | -0.5 | 339 | 1.5 |
| 2020 | 1 | 4 | 19 | -0.7 | 0   | 0   | 0   | 1014 | -0.7 | 346 | 1.4 |
| 2020 | 1 | 4 | 20 | -1   | 0   | 0   | 0   | 1014 | -1   | 355 | 1.3 |
| 2020 | 1 | 4 | 21 | -1.1 | 0   | 0   | 0   | 1014 | -1.1 | 1   | 1.3 |
| 2020 | 1 | 4 | 22 | -1.2 | 0   | 0   | 0   | 1015 | -1.2 | 5   | 1.2 |
| 2020 | 1 | 4 | 23 | -1.2 | 0   | 0   | 0   | 1015 | -1.2 | 7   | 1.2 |
| 2020 | 1 | 5 | 0  | -1.5 | 0   | 0   | 0   | 1015 | -1.5 | 4   | 1.2 |
| 2020 | 1 | 5 | 1  | -2   | 0   | 0   | 0   | 1015 | -2   | 4   | 1.2 |

|      |   |   |    |      |     |     |     |      |      |     |     |
|------|---|---|----|------|-----|-----|-----|------|------|-----|-----|
| 2020 | 1 | 5 | 2  | -2.9 | 0   | 0   | 0   | 1015 | -2.5 | 7   | 1.2 |
| 2020 | 1 | 5 | 3  | -4   | 0   | 0   | 0   | 1015 | -2.8 | 9   | 1.2 |
| 2020 | 1 | 5 | 4  | -4.8 | 0   | 0   | 0   | 1016 | -3   | 13  | 1.3 |
| 2020 | 1 | 5 | 5  | -5.4 | 0   | 0   | 0   | 1016 | -3.2 | 20  | 1.3 |
| 2020 | 1 | 5 | 6  | -5.9 | 0   | 0   | 0   | 1016 | -3.3 | 29  | 1.3 |
| 2020 | 1 | 5 | 7  | -6.1 | 0   | 0   | 0   | 1017 | -3.3 | 37  | 1.2 |
| 2020 | 1 | 5 | 8  | -5   | 20  | 253 | 32  | 1017 | -1   | 45  | 1.7 |
| 2020 | 1 | 5 | 9  | -5.8 | 54  | 655 | 198 | 1018 | 1.3  | 50  | 2.3 |
| 2020 | 1 | 5 | 10 | -6.6 | 70  | 819 | 368 | 1018 | 4.2  | 47  | 2.1 |
| 2020 | 1 | 5 | 11 | -7.3 | 79  | 892 | 496 | 1017 | 6.3  | 42  | 1.7 |
| 2020 | 1 | 5 | 12 | -6.9 | 84  | 922 | 568 | 1016 | 7.4  | 34  | 1.5 |
| 2020 | 1 | 5 | 13 | -6.1 | 84  | 928 | 577 | 1016 | 7.6  | 15  | 1.2 |
| 2020 | 1 | 5 | 14 | -4.8 | 197 | 335 | 360 | 1015 | 7.4  | 359 | 0.9 |
| 2020 | 1 | 5 | 15 | -0.8 | 79  | 812 | 399 | 1015 | 6.3  | 348 | 0.6 |
| 2020 | 1 | 5 | 16 | -3   | 61  | 675 | 237 | 1016 | 4.5  | 346 | 0.9 |
| 2020 | 1 | 5 | 17 | -4.2 | 33  | 41  | 37  | 1016 | 3.1  | 360 | 1.1 |
| 2020 | 1 | 5 | 18 | -4.3 | 0   | 0   | 0   | 1016 | 2.5  | 17  | 1.1 |
| 2020 | 1 | 5 | 19 | -4.7 | 0   | 0   | 0   | 1017 | 2.6  | 39  | 1   |
| 2020 | 1 | 5 | 20 | -5.4 | 0   | 0   | 0   | 1017 | 2.6  | 73  | 1   |
| 2020 | 1 | 5 | 21 | -4.9 | 0   | 0   | 0   | 1017 | 1.8  | 107 | 1.2 |
| 2020 | 1 | 5 | 22 | -4.7 | 0   | 0   | 0   | 1016 | 0.7  | 122 | 1.3 |
| 2020 | 1 | 5 | 23 | -3.6 | 0   | 0   | 0   | 1016 | 0.8  | 126 | 1.3 |
| 2020 | 1 | 6 | 0  | -2.7 | 0   | 0   | 0   | 1015 | 1    | 123 | 1.5 |
| 2020 | 1 | 6 | 1  | -2.6 | 0   | 0   | 0   | 1015 | 0.8  | 118 | 1.6 |
| 2020 | 1 | 6 | 2  | -1.7 | 0   | 0   | 0   | 1015 | 1.4  | 112 | 1.6 |
| 2020 | 1 | 6 | 3  | -1.1 | 0   | 0   | 0   | 1015 | 1.7  | 108 | 1.5 |
| 2020 | 1 | 6 | 4  | -0.6 | 0   | 0   | 0   | 1015 | 1.7  | 96  | 1.4 |
| 2020 | 1 | 6 | 5  | 0    | 0   | 0   | 0   | 1015 | 1.7  | 84  | 1.5 |
| 2020 | 1 | 6 | 6  | 0.7  | 0   | 0   | 0   | 1015 | 2    | 71  | 1.8 |
| 2020 | 1 | 6 | 7  | 1.3  | 0   | 0   | 0   | 1015 | 2.4  | 69  | 2.7 |
| 2020 | 1 | 6 | 8  | 2.2  | 7   | 0   | 7   | 1014 | 3.2  | 79  | 3.6 |
| 2020 | 1 | 6 | 9  | 3.1  | 27  | 0   | 27  | 1015 | 4.1  | 85  | 3.7 |
| 2020 | 1 | 6 | 10 | 3.9  | 24  | 0   | 24  | 1014 | 5.2  | 96  | 4.1 |
| 2020 | 1 | 6 | 11 | 4.9  | 43  | 0   | 43  | 1013 | 6.4  | 105 | 4.6 |
| 2020 | 1 | 6 | 12 | 5.7  | 84  | 0   | 84  | 1012 | 7.2  | 109 | 4.8 |
| 2020 | 1 | 6 | 13 | 6.2  | 44  | 0   | 44  | 1011 | 7.6  | 109 | 4.7 |
| 2020 | 1 | 6 | 14 | 6.3  | 24  | 0   | 24  | 1011 | 7.4  | 104 | 4.2 |
| 2020 | 1 | 6 | 15 | 6.1  | 17  | 0   | 17  | 1010 | 6.9  | 103 | 4.3 |
| 2020 | 1 | 6 | 16 | 5.8  | 12  | 0   | 12  | 1009 | 6.4  | 106 | 4.6 |
| 2020 | 1 | 6 | 17 | 5.7  | 5   | 0   | 5   | 1009 | 6.1  | 108 | 4.6 |
| 2020 | 1 | 6 | 18 | 6    | 0   | 0   | 0   | 1009 | 6.4  | 109 | 4.3 |
| 2020 | 1 | 6 | 19 | 6.3  | 0   | 0   | 0   | 1009 | 6.7  | 110 | 4.4 |
| 2020 | 1 | 6 | 20 | 6.6  | 0   | 0   | 0   | 1008 | 6.9  | 111 | 4.3 |
| 2020 | 1 | 6 | 21 | 6.7  | 0   | 0   | 0   | 1007 | 7.1  | 112 | 4.4 |
| 2020 | 1 | 6 | 22 | 7.1  | 0   | 0   | 0   | 1007 | 7.5  | 115 | 4.3 |
| 2020 | 1 | 6 | 23 | 7.9  | 0   | 0   | 0   | 1006 | 8.4  | 122 | 4.1 |
| 2020 | 1 | 7 | 0  | 8.4  | 0   | 0   | 0   | 1005 | 8.8  | 122 | 3.8 |
| 2020 | 1 | 7 | 1  | 8.9  | 0   | 0   | 0   | 1004 | 9.2  | 127 | 3.5 |
| 2020 | 1 | 7 | 2  | 9.6  | 0   | 0   | 0   | 1004 | 9.7  | 138 | 3.1 |
| 2020 | 1 | 7 | 3  | 10.4 | 0   | 0   | 0   | 1003 | 10.4 | 160 | 2.6 |

|      |   |   |    |      |     |   |     |      |      |     |     |
|------|---|---|----|------|-----|---|-----|------|------|-----|-----|
| 2020 | 1 | 7 | 4  | 10.9 | 0   | 0 | 0   | 1002 | 10.9 | 185 | 2.2 |
| 2020 | 1 | 7 | 5  | 11.5 | 0   | 0 | 0   | 1002 | 11.5 | 202 | 2.4 |
| 2020 | 1 | 7 | 6  | 11.6 | 0   | 0 | 0   | 1002 | 11.6 | 206 | 2.3 |
| 2020 | 1 | 7 | 7  | 11.6 | 0   | 0 | 0   | 1002 | 11.6 | 207 | 2.3 |
| 2020 | 1 | 7 | 8  | 12   | 6   | 0 | 6   | 1002 | 12   | 202 | 2.2 |
| 2020 | 1 | 7 | 9  | 12.9 | 23  | 0 | 23  | 1002 | 13.1 | 195 | 2.6 |
| 2020 | 1 | 7 | 10 | 14   | 76  | 0 | 76  | 1002 | 14.5 | 190 | 3.4 |
| 2020 | 1 | 7 | 11 | 14.9 | 155 | 2 | 155 | 1001 | 15.6 | 201 | 4.2 |
| 2020 | 1 | 7 | 12 | 15.2 | 35  | 0 | 35  | 1000 | 15.9 | 203 | 4.5 |
| 2020 | 1 | 7 | 13 | 15.3 | 111 | 0 | 111 | 998  | 16.2 | 199 | 5   |
| 2020 | 1 | 7 | 14 | 15.5 | 25  | 0 | 25  | 997  | 16.6 | 194 | 5   |
| 2020 | 1 | 7 | 15 | 15.5 | 46  | 0 | 46  | 997  | 16.7 | 193 | 5.1 |
| 2020 | 1 | 7 | 16 | 15.3 | 9   | 0 | 9   | 996  | 16.4 | 188 | 5.1 |
| 2020 | 1 | 7 | 17 | 15.2 | 5   | 0 | 5   | 995  | 16   | 184 | 5.4 |
| 2020 | 1 | 7 | 18 | 15.2 | 0   | 0 | 0   | 994  | 15.8 | 184 | 5.8 |
| 2020 | 1 | 7 | 19 | 15.2 | 0   | 0 | 0   | 993  | 15.7 | 183 | 6.5 |
| 2020 | 1 | 7 | 20 | 15.1 | 0   | 0 | 0   | 991  | 15.6 | 188 | 7.1 |
| 2020 | 1 | 7 | 21 | 14.1 | 0   | 0 | 0   | 991  | 14.6 | 232 | 8   |
| 2020 | 1 | 7 | 22 | 9.9  | 0   | 0 | 0   | 992  | 10.6 | 254 | 7.2 |
| 2020 | 1 | 7 | 23 | 6.7  | 0   | 0 | 0   | 993  | 7.6  | 264 | 7.5 |
| 2020 | 1 | 8 | 0  | 5.3  | 0   | 0 | 0   | 994  | 6.4  | 265 | 7.6 |
| 2020 | 1 | 8 | 1  | 4.8  | 0   | 0 | 0   | 994  | 6    | 266 | 7.3 |
| 2020 | 1 | 8 | 2  | 4.3  | 0   | 0 | 0   | 995  | 5.7  | 268 | 7.6 |
| 2020 | 1 | 8 | 3  | 4.1  | 0   | 0 | 0   | 996  | 5.6  | 273 | 8   |
| 2020 | 1 | 8 | 4  | 3.8  | 0   | 0 | 0   | 996  | 5.4  | 280 | 8   |
| 2020 | 1 | 8 | 5  | 3.6  | 0   | 0 | 0   | 998  | 5.1  | 284 | 7.8 |
| 2020 | 1 | 8 | 6  | 3.4  | 0   | 0 | 0   | 999  | 4.9  | 288 | 7.6 |
| 2020 | 1 | 8 | 7  | 3    | 0   | 0 | 0   | 1000 | 4.5  | 291 | 7.5 |
| 2020 | 1 | 8 | 8  | 2.5  | 3   | 0 | 3   | 1002 | 4.3  | 294 | 7.3 |
| 2020 | 1 | 8 | 9  | 1.6  | 13  | 0 | 13  | 1003 | 4.6  | 299 | 7.7 |
| 2020 | 1 | 8 | 10 | 0.7  | 26  | 0 | 26  | 1004 | 5.1  | 304 | 7.9 |
| 2020 | 1 | 8 | 11 | 0.3  | 39  | 0 | 39  | 1004 | 5.6  | 307 | 7.8 |
| 2020 | 1 | 8 | 12 | 0.1  | 47  | 0 | 47  | 1004 | 5.8  | 309 | 7.4 |
| 2020 | 1 | 8 | 13 | 0.1  | 48  | 0 | 48  | 1005 | 6.1  | 309 | 7.1 |
| 2020 | 1 | 8 | 14 | 0.1  | 42  | 0 | 42  | 1005 | 5.7  | 309 | 6.5 |
| 2020 | 1 | 8 | 15 | 0.1  | 31  | 0 | 31  | 1006 | 5.1  | 311 | 5.9 |
| 2020 | 1 | 8 | 16 | 0.2  | 17  | 0 | 17  | 1007 | 4.4  | 312 | 4.9 |
| 2020 | 1 | 8 | 17 | 0.7  | 5   | 0 | 5   | 1007 | 3.6  | 312 | 3.7 |
| 2020 | 1 | 8 | 18 | 1    | 0   | 0 | 0   | 1009 | 3    | 310 | 3.3 |
| 2020 | 1 | 8 | 19 | 0.9  | 0   | 0 | 0   | 1009 | 2.8  | 312 | 3.3 |
| 2020 | 1 | 8 | 20 | 0.8  | 0   | 0 | 0   | 1010 | 3    | 314 | 3.7 |
| 2020 | 1 | 8 | 21 | 0.5  | 0   | 0 | 0   | 1010 | 3    | 317 | 4   |
| 2020 | 1 | 8 | 22 | 0.3  | 0   | 0 | 0   | 1010 | 2.9  | 323 | 4.1 |
| 2020 | 1 | 8 | 23 | 0.2  | 0   | 0 | 0   | 1010 | 2.7  | 328 | 4.2 |
| 2020 | 1 | 9 | 0  | 0.1  | 0   | 0 | 0   | 1009 | 2.3  | 330 | 3.9 |
| 2020 | 1 | 9 | 1  | -0.1 | 0   | 0 | 0   | 1010 | 2.1  | 329 | 3.8 |
| 2020 | 1 | 9 | 2  | -0.4 | 0   | 0 | 0   | 1009 | 2    | 330 | 3.5 |
| 2020 | 1 | 9 | 3  | -0.6 | 0   | 0 | 0   | 1009 | 1.6  | 330 | 3.3 |
| 2020 | 1 | 9 | 4  | -0.8 | 0   | 0 | 0   | 1009 | 1.4  | 332 | 3.2 |
| 2020 | 1 | 9 | 5  | -1   | 0   | 0 | 0   | 1009 | 1.1  | 334 | 3.1 |

|      |   |    |    |      |     |     |     |      |      |     |     |
|------|---|----|----|------|-----|-----|-----|------|------|-----|-----|
| 2020 | 1 | 9  | 6  | -1.1 | 0   | 0   | 0   | 1010 | 0.7  | 333 | 2.9 |
| 2020 | 1 | 9  | 7  | -1.1 | 0   | 0   | 0   | 1010 | 0.7  | 337 | 2.6 |
| 2020 | 1 | 9  | 8  | -1   | 13  | 0   | 13  | 1011 | 1.5  | 337 | 3.2 |
| 2020 | 1 | 9  | 9  | -1   | 85  | 66  | 99  | 1012 | 3.1  | 336 | 4.3 |
| 2020 | 1 | 9  | 10 | -1.2 | 114 | 630 | 344 | 1011 | 4.2  | 338 | 4.7 |
| 2020 | 1 | 9  | 11 | -1.4 | 181 | 381 | 361 | 1011 | 5    | 338 | 4.8 |
| 2020 | 1 | 9  | 12 | -1.4 | 179 | 515 | 452 | 1010 | 5.6  | 334 | 4.8 |
| 2020 | 1 | 9  | 13 | -1.6 | 146 | 627 | 484 | 1010 | 5.8  | 331 | 4.7 |
| 2020 | 1 | 9  | 14 | -1.7 | 188 | 409 | 390 | 1009 | 5.7  | 330 | 4.4 |
| 2020 | 1 | 9  | 15 | -1.6 | 170 | 217 | 257 | 1010 | 5.4  | 326 | 4.3 |
| 2020 | 1 | 9  | 16 | -1.2 | 90  | 365 | 189 | 1010 | 4.1  | 328 | 3.4 |
| 2020 | 1 | 9  | 17 | -0.8 | 36  | 1   | 36  | 1010 | 1.6  | 333 | 2.1 |
| 2020 | 1 | 9  | 18 | -1   | 0   | 0   | 0   | 1011 | 0.7  | 340 | 2.1 |
| 2020 | 1 | 9  | 19 | -1.5 | 0   | 0   | 0   | 1011 | -0.3 | 345 | 2   |
| 2020 | 1 | 9  | 20 | -1.9 | 0   | 0   | 0   | 1012 | -1.2 | 349 | 1.9 |
| 2020 | 1 | 9  | 21 | -2.4 | 0   | 0   | 0   | 1012 | -1.9 | 354 | 1.9 |
| 2020 | 1 | 9  | 22 | -3   | 0   | 0   | 0   | 1012 | -2.4 | 358 | 2   |
| 2020 | 1 | 9  | 23 | -3.6 | 0   | 0   | 0   | 1012 | -3.1 | 1   | 1.8 |
| 2020 | 1 | 10 | 0  | -4.3 | 0   | 0   | 0   | 1011 | -3.3 | 4   | 1.8 |
| 2020 | 1 | 10 | 1  | -4.9 | 0   | 0   | 0   | 1011 | -3.8 | 7   | 1.7 |
| 2020 | 1 | 10 | 2  | -5.5 | 0   | 0   | 0   | 1011 | -4.3 | 10  | 1.6 |
| 2020 | 1 | 10 | 3  | -6   | 0   | 0   | 0   | 1011 | -4.5 | 9   | 1.7 |
| 2020 | 1 | 10 | 4  | -6.1 | 0   | 0   | 0   | 1010 | -4.4 | 8   | 1.8 |
| 2020 | 1 | 10 | 5  | -6.1 | 0   | 0   | 0   | 1011 | -4   | 9   | 2.1 |
| 2020 | 1 | 10 | 6  | -6.5 | 0   | 0   | 0   | 1011 | -4.4 | 11  | 1.8 |
| 2020 | 1 | 10 | 7  | -6.7 | 0   | 0   | 0   | 1011 | -4.7 | 11  | 1.6 |
| 2020 | 1 | 10 | 8  | -6.4 | 17  | 0   | 17  | 1011 | -2.6 | 13  | 2.5 |
| 2020 | 1 | 10 | 9  | -5.8 | 82  | 215 | 129 | 1012 | -0.3 | 12  | 2.6 |
| 2020 | 1 | 10 | 10 | -5.5 | 97  | 706 | 356 | 1011 | 2.3  | 11  | 2.5 |
| 2020 | 1 | 10 | 11 | -4.9 | 112 | 788 | 485 | 1010 | 4.4  | 9   | 2.2 |
| 2020 | 1 | 10 | 12 | -4.4 | 117 | 835 | 561 | 1009 | 6.1  | 358 | 1.7 |
| 2020 | 1 | 10 | 13 | -4.1 | 120 | 825 | 566 | 1008 | 7.2  | 331 | 1.7 |
| 2020 | 1 | 10 | 14 | -3.5 | 120 | 782 | 510 | 1008 | 7.4  | 315 | 2.1 |
| 2020 | 1 | 10 | 15 | -2.6 | 104 | 733 | 402 | 1008 | 6.7  | 313 | 2.4 |
| 2020 | 1 | 10 | 16 | -0.5 | 81  | 597 | 245 | 1008 | 4.7  | 325 | 1.7 |
| 2020 | 1 | 10 | 17 | -1.4 | 41  | 301 | 74  | 1008 | 1.3  | 340 | 1.5 |
| 2020 | 1 | 10 | 18 | -2.6 | 0   | 0   | 0   | 1008 | 0    | 352 | 1.6 |
| 2020 | 1 | 10 | 19 | -3.3 | 0   | 0   | 0   | 1009 | -0.7 | 358 | 1.6 |
| 2020 | 1 | 10 | 20 | -3.6 | 0   | 0   | 0   | 1009 | -1.1 | 0   | 1.6 |
| 2020 | 1 | 10 | 21 | -4   | 0   | 0   | 0   | 1009 | -1.3 | 8   | 1.8 |
| 2020 | 1 | 10 | 22 | -4   | 0   | 0   | 0   | 1008 | -1.2 | 11  | 1.7 |
| 2020 | 1 | 10 | 23 | -3.9 | 0   | 0   | 0   | 1008 | -1.3 | 12  | 1.4 |
| 2020 | 1 | 11 | 0  | -4.1 | 0   | 0   | 0   | 1008 | -1.4 | 7   | 1.5 |
| 2020 | 1 | 11 | 1  | -4.6 | 0   | 0   | 0   | 1008 | -1.3 | 1   | 2.2 |
| 2020 | 1 | 11 | 2  | -5.1 | 0   | 0   | 0   | 1008 | -1.3 | 1   | 2.6 |
| 2020 | 1 | 11 | 3  | -5.2 | 0   | 0   | 0   | 1008 | -1.6 | 2   | 2.4 |
| 2020 | 1 | 11 | 4  | -5.1 | 0   | 0   | 0   | 1008 | -1.7 | 2   | 2.2 |
| 2020 | 1 | 11 | 5  | -4.8 | 0   | 0   | 0   | 1008 | -1.8 | 2   | 2.1 |
| 2020 | 1 | 11 | 6  | -4.5 | 0   | 0   | 0   | 1008 | -2.1 | 4   | 1.9 |
| 2020 | 1 | 11 | 7  | -4.7 | 0   | 0   | 0   | 1008 | -2.7 | 9   | 1.6 |

|      |   |    |    |      |     |     |     |      |      |     |     |
|------|---|----|----|------|-----|-----|-----|------|------|-----|-----|
| 2020 | 1 | 11 | 8  | -3.7 | 18  | 96  | 23  | 1008 | -0.8 | 13  | 2.1 |
| 2020 | 1 | 11 | 9  | -2.8 | 65  | 0   | 65  | 1009 | 1.6  | 13  | 2.5 |
| 2020 | 1 | 11 | 10 | -1   | 152 | 72  | 179 | 1008 | 4.5  | 3   | 3.3 |
| 2020 | 1 | 11 | 11 | -0.2 | 143 | 655 | 454 | 1008 | 5.8  | 353 | 3.4 |
| 2020 | 1 | 11 | 12 | 0.2  | 174 | 640 | 516 | 1007 | 6.6  | 345 | 3.4 |
| 2020 | 1 | 11 | 13 | 0.3  | 177 | 641 | 526 | 1005 | 7.1  | 340 | 3.3 |
| 2020 | 1 | 11 | 14 | 0.3  | 172 | 600 | 472 | 1005 | 7.2  | 330 | 3.3 |
| 2020 | 1 | 11 | 15 | 0.3  | 147 | 542 | 370 | 1005 | 6.8  | 329 | 3.2 |
| 2020 | 1 | 11 | 16 | 0.9  | 115 | 367 | 217 | 1005 | 5.4  | 331 | 2.4 |
| 2020 | 1 | 11 | 17 | 0.9  | 45  | 120 | 59  | 1005 | 3    | 332 | 1.6 |
| 2020 | 1 | 11 | 18 | 0.2  | 0   | 0   | 0   | 1005 | 2.1  | 339 | 1.8 |
| 2020 | 1 | 11 | 19 | -0.2 | 0   | 0   | 0   | 1006 | 1.6  | 345 | 1.9 |
| 2020 | 1 | 11 | 20 | -0.7 | 0   | 0   | 0   | 1006 | 0.9  | 348 | 2   |
| 2020 | 1 | 11 | 21 | -1.3 | 0   | 0   | 0   | 1006 | 0.2  | 352 | 2.3 |
| 2020 | 1 | 11 | 22 | -1.8 | 0   | 0   | 0   | 1006 | -0.3 | 354 | 2.3 |
| 2020 | 1 | 11 | 23 | -2.3 | 0   | 0   | 0   | 1006 | -0.8 | 356 | 2   |
| 2020 | 1 | 12 | 0  | -2.4 | 0   | 0   | 0   | 1005 | -0.7 | 357 | 1.8 |
| 2020 | 1 | 12 | 1  | -2.4 | 0   | 0   | 0   | 1005 | -0.8 | 354 | 1.5 |
| 2020 | 1 | 12 | 2  | -2.5 | 0   | 0   | 0   | 1005 | -1.2 | 347 | 1.4 |
| 2020 | 1 | 12 | 3  | -2.6 | 0   | 0   | 0   | 1004 | -1.4 | 341 | 1.5 |
| 2020 | 1 | 12 | 4  | -2.2 | 0   | 0   | 0   | 1004 | -1   | 336 | 1.7 |
| 2020 | 1 | 12 | 5  | -1.9 | 0   | 0   | 0   | 1004 | -0.8 | 332 | 1.8 |
| 2020 | 1 | 12 | 6  | -1.7 | 0   | 0   | 0   | 1005 | -0.5 | 328 | 1.9 |
| 2020 | 1 | 12 | 7  | -1.2 | 0   | 0   | 0   | 1005 | 0.2  | 327 | 2   |
| 2020 | 1 | 12 | 8  | -0.4 | 7   | 0   | 7   | 1005 | 1.4  | 324 | 2.5 |
| 2020 | 1 | 12 | 9  | -0.2 | 46  | 0   | 46  | 1005 | 2.9  | 322 | 3.7 |
| 2020 | 1 | 12 | 10 | -0.9 | 106 | 0   | 106 | 1006 | 4    | 318 | 4.7 |
| 2020 | 1 | 12 | 11 | -1.5 | 200 | 55  | 227 | 1005 | 4.7  | 316 | 5.2 |
| 2020 | 1 | 12 | 12 | -1.8 | 246 | 137 | 320 | 1004 | 5.2  | 314 | 5.5 |
| 2020 | 1 | 12 | 13 | -2   | 245 | 249 | 380 | 1004 | 5.4  | 313 | 5.7 |
| 2020 | 1 | 12 | 14 | -2.2 | 57  | 0   | 57  | 1004 | 5.3  | 312 | 5.7 |
| 2020 | 1 | 12 | 15 | -2.3 | 164 | 36  | 179 | 1005 | 4.8  | 312 | 5.6 |
| 2020 | 1 | 12 | 16 | -2   | 45  | 0   | 45  | 1005 | 3.7  | 313 | 4.7 |
| 2020 | 1 | 12 | 17 | -1.2 | 13  | 0   | 13  | 1006 | 2.3  | 314 | 3.4 |
| 2020 | 1 | 12 | 18 | -0.8 | 0   | 0   | 0   | 1006 | 1.9  | 315 | 3.1 |
| 2020 | 1 | 12 | 19 | -0.8 | 0   | 0   | 0   | 1007 | 1.6  | 315 | 2.9 |
| 2020 | 1 | 12 | 20 | -0.9 | 0   | 0   | 0   | 1007 | 1.6  | 314 | 2.9 |
| 2020 | 1 | 12 | 21 | -1.1 | 0   | 0   | 0   | 1007 | 1.2  | 314 | 2.7 |
| 2020 | 1 | 12 | 22 | -1.3 | 0   | 0   | 0   | 1008 | 1    | 314 | 2.7 |
| 2020 | 1 | 12 | 23 | -1.5 | 0   | 0   | 0   | 1008 | 0.6  | 315 | 2.5 |
| 2020 | 1 | 13 | 0  | -1.5 | 0   | 0   | 0   | 1007 | 0.7  | 316 | 2.7 |
| 2020 | 1 | 13 | 1  | -1.4 | 0   | 0   | 0   | 1007 | 0.9  | 317 | 2.8 |
| 2020 | 1 | 13 | 2  | -1.4 | 0   | 0   | 0   | 1008 | 0.8  | 316 | 2.8 |
| 2020 | 1 | 13 | 3  | -1.4 | 0   | 0   | 0   | 1008 | 0.6  | 316 | 2.6 |
| 2020 | 1 | 13 | 4  | -1.4 | 0   | 0   | 0   | 1008 | 0.4  | 315 | 2.5 |
| 2020 | 1 | 13 | 5  | -1.7 | 0   | 0   | 0   | 1008 | -0.1 | 313 | 2.3 |
| 2020 | 1 | 13 | 6  | -1.5 | 0   | 0   | 0   | 1009 | 0.2  | 313 | 2.2 |
| 2020 | 1 | 13 | 7  | -1.5 | 0   | 0   | 0   | 1009 | 0.2  | 314 | 2   |
| 2020 | 1 | 13 | 8  | -1.2 | 9   | 0   | 9   | 1009 | 1.4  | 314 | 2.7 |
| 2020 | 1 | 13 | 9  | -1.4 | 56  | 0   | 56  | 1010 | 2.6  | 312 | 3.5 |

|      |   |    |    |      |     |     |     |      |      |     |     |
|------|---|----|----|------|-----|-----|-----|------|------|-----|-----|
| 2020 | 1 | 13 | 10 | -2.5 | 133 | 7   | 135 | 1010 | 3.4  | 309 | 4.3 |
| 2020 | 1 | 13 | 11 | -2.9 | 153 | 662 | 470 | 1010 | 4.1  | 307 | 4.7 |
| 2020 | 1 | 13 | 12 | -3   | 244 | 211 | 358 | 1010 | 4.4  | 306 | 5   |
| 2020 | 1 | 13 | 13 | -3.1 | 250 | 212 | 366 | 1009 | 4.4  | 307 | 5.2 |
| 2020 | 1 | 13 | 14 | -3.2 | 227 | 107 | 281 | 1009 | 4.2  | 310 | 5.1 |
| 2020 | 1 | 13 | 15 | -3.2 | 123 | 668 | 400 | 1010 | 3.5  | 314 | 4.7 |
| 2020 | 1 | 13 | 16 | -3   | 93  | 541 | 246 | 1010 | 2.6  | 325 | 3.7 |
| 2020 | 1 | 13 | 17 | -2.5 | 46  | 260 | 76  | 1010 | 0.1  | 337 | 1.8 |
| 2020 | 1 | 13 | 18 | -2.9 | 0   | 0   | 0   | 1011 | -0.8 | 339 | 1.7 |
| 2020 | 1 | 13 | 19 | -2.9 | 0   | 0   | 0   | 1011 | -0.7 | 348 | 1.7 |
| 2020 | 1 | 13 | 20 | -3.1 | 0   | 0   | 0   | 1011 | -0.9 | 350 | 1.6 |
| 2020 | 1 | 13 | 21 | -3.4 | 0   | 0   | 0   | 1011 | -1.3 | 3   | 1.5 |
| 2020 | 1 | 13 | 22 | -3.7 | 0   | 0   | 0   | 1011 | -1.8 | 10  | 1.2 |
| 2020 | 1 | 13 | 23 | -3.8 | 0   | 0   | 0   | 1012 | -2   | 11  | 1   |
| 2020 | 1 | 14 | 0  | -3.8 | 0   | 0   | 0   | 1012 | -2   | 15  | 1   |
| 2020 | 1 | 14 | 1  | -3.8 | 0   | 0   | 0   | 1012 | -1.9 | 19  | 1.2 |
| 2020 | 1 | 14 | 2  | -3.9 | 0   | 0   | 0   | 1012 | -2   | 23  | 1.3 |
| 2020 | 1 | 14 | 3  | -4.1 | 0   | 0   | 0   | 1012 | -2.2 | 27  | 1.5 |
| 2020 | 1 | 14 | 4  | -4.2 | 0   | 0   | 0   | 1011 | -2.3 | 29  | 1.7 |
| 2020 | 1 | 14 | 5  | -4.2 | 0   | 0   | 0   | 1011 | -2.4 | 30  | 1.8 |
| 2020 | 1 | 14 | 6  | -4.1 | 0   | 0   | 0   | 1012 | -2.3 | 30  | 1.6 |
| 2020 | 1 | 14 | 7  | -4   | 0   | 0   | 0   | 1012 | -2.3 | 31  | 1.5 |
| 2020 | 1 | 14 | 8  | -4.3 | 13  | 12  | 14  | 1012 | -1.6 | 25  | 1.9 |
| 2020 | 1 | 14 | 9  | -4.5 | 86  | 59  | 100 | 1012 | -0.5 | 15  | 2.1 |
| 2020 | 1 | 14 | 10 | -4.4 | 195 | 320 | 314 | 1012 | 0.7  | 2   | 2.2 |
| 2020 | 1 | 14 | 11 | -4.2 | 214 | 138 | 280 | 1012 | 1.8  | 352 | 2.4 |
| 2020 | 1 | 14 | 12 | -4   | 213 | 28  | 229 | 1011 | 2.7  | 341 | 2.5 |
| 2020 | 1 | 14 | 13 | -3.7 | 241 | 286 | 399 | 1011 | 3.1  | 332 | 2.7 |
| 2020 | 1 | 14 | 14 | -3.3 | 221 | 516 | 484 | 1011 | 3.2  | 326 | 2.8 |
| 2020 | 1 | 14 | 15 | -2.8 | 191 | 435 | 373 | 1011 | 2.9  | 323 | 2.7 |
| 2020 | 1 | 14 | 16 | -1.5 | 135 | 323 | 227 | 1011 | 1.9  | 322 | 1.7 |
| 2020 | 1 | 14 | 17 | -2   | 51  | 131 | 67  | 1012 | -0.3 | 324 | 1.2 |
| 2020 | 1 | 14 | 18 | -2.6 | 0   | 0   | 0   | 1013 | -1   | 329 | 1.1 |
| 2020 | 1 | 14 | 19 | -2.9 | 0   | 0   | 0   | 1013 | -1.5 | 338 | 1.1 |
| 2020 | 1 | 14 | 20 | -3   | 0   | 0   | 0   | 1014 | -2   | 351 | 1.1 |
| 2020 | 1 | 14 | 21 | -3.1 | 0   | 0   | 0   | 1014 | -2.4 | 358 | 1   |
| 2020 | 1 | 14 | 22 | -3.2 | 0   | 0   | 0   | 1014 | -2.6 | 0   | 1   |
| 2020 | 1 | 14 | 23 | -3.5 | 0   | 0   | 0   | 1014 | -2.8 | 358 | 1   |
| 2020 | 1 | 15 | 0  | -3.7 | 0   | 0   | 0   | 1014 | -3.1 | 357 | 1.1 |
| 2020 | 1 | 15 | 1  | -3.9 | 0   | 0   | 0   | 1014 | -3.4 | 355 | 1.2 |
| 2020 | 1 | 15 | 2  | -4.1 | 0   | 0   | 0   | 1014 | -3.5 | 358 | 1.3 |
| 2020 | 1 | 15 | 3  | -4.4 | 0   | 0   | 0   | 1014 | -3.7 | 353 | 1.4 |
| 2020 | 1 | 15 | 4  | -4.6 | 0   | 0   | 0   | 1014 | -3.9 | 353 | 1.6 |
| 2020 | 1 | 15 | 5  | -4.8 | 0   | 0   | 0   | 1014 | -4   | 360 | 1.9 |
| 2020 | 1 | 15 | 6  | -5.1 | 0   | 0   | 0   | 1015 | -4.1 | 6   | 1.8 |
| 2020 | 1 | 15 | 7  | -5.4 | 0   | 0   | 0   | 1015 | -4.2 | 10  | 1.5 |
| 2020 | 1 | 15 | 8  | -5   | 21  | 126 | 28  | 1016 | -2.4 | 9   | 2.5 |
| 2020 | 1 | 15 | 9  | -4.5 | 71  | 530 | 190 | 1016 | -0.3 | 359 | 2.9 |
| 2020 | 1 | 15 | 10 | -4.5 | 93  | 717 | 361 | 1017 | 1.6  | 343 | 3.3 |
| 2020 | 1 | 15 | 11 | -4.6 | 103 | 816 | 496 | 1016 | 2.9  | 335 | 3.4 |

|      |   |    |    |      |     |     |     |      |      |     |     |
|------|---|----|----|------|-----|-----|-----|------|------|-----|-----|
| 2020 | 1 | 15 | 12 | -4.5 | 103 | 872 | 576 | 1015 | 3.8  | 331 | 3.5 |
| 2020 | 1 | 15 | 13 | -4.4 | 103 | 881 | 591 | 1014 | 4.2  | 329 | 3.8 |
| 2020 | 1 | 15 | 14 | -4.4 | 98  | 860 | 539 | 1014 | 4.1  | 332 | 4   |
| 2020 | 1 | 15 | 15 | -4.3 | 89  | 802 | 427 | 1014 | 3.4  | 335 | 4   |
| 2020 | 1 | 15 | 16 | -3.7 | 114 | 61  | 132 | 1014 | 1.8  | 337 | 3   |
| 2020 | 1 | 15 | 17 | -4.2 | 39  | 0   | 39  | 1015 | -1.8 | 342 | 1.7 |
| 2020 | 1 | 15 | 18 | -4.4 | 0   | 0   | 0   | 1015 | -2.1 | 354 | 1.8 |
| 2020 | 1 | 15 | 19 | -4.3 | 0   | 0   | 0   | 1015 | -2   | 6   | 1.9 |
| 2020 | 1 | 15 | 20 | -4.2 | 0   | 0   | 0   | 1015 | -1.9 | 12  | 1.8 |
| 2020 | 1 | 15 | 21 | -4   | 0   | 0   | 0   | 1015 | -1.9 | 11  | 1.4 |
| 2020 | 1 | 15 | 22 | -4   | 0   | 0   | 0   | 1015 | -2   | 7   | 1.2 |
| 2020 | 1 | 15 | 23 | -4.1 | 0   | 0   | 0   | 1015 | -2   | 2   | 1.1 |
| 2020 | 1 | 16 | 0  | -4.2 | 0   | 0   | 0   | 1015 | -2   | 358 | 1.2 |
| 2020 | 1 | 16 | 1  | -4.4 | 0   | 0   | 0   | 1014 | -2   | 1   | 1.5 |
| 2020 | 1 | 16 | 2  | -4.6 | 0   | 0   | 0   | 1015 | -2   | 2   | 1.8 |
| 2020 | 1 | 16 | 3  | -4.8 | 0   | 0   | 0   | 1014 | -2.1 | 6   | 2   |
| 2020 | 1 | 16 | 4  | -4.8 | 0   | 0   | 0   | 1014 | -2.2 | 7   | 2   |
| 2020 | 1 | 16 | 5  | -4.8 | 0   | 0   | 0   | 1014 | -2.2 | 10  | 2.2 |
| 2020 | 1 | 16 | 6  | -4.8 | 0   | 0   | 0   | 1014 | -2.2 | 13  | 2.1 |
| 2020 | 1 | 16 | 7  | -4.8 | 0   | 0   | 0   | 1014 | -2.2 | 16  | 1.9 |
| 2020 | 1 | 16 | 8  | -5.2 | 19  | 0   | 19  | 1015 | -1.7 | 14  | 2.4 |
| 2020 | 1 | 16 | 9  | -5.8 | 84  | 220 | 134 | 1015 | -0.8 | 17  | 2.6 |
| 2020 | 1 | 16 | 10 | -6.5 | 149 | 266 | 249 | 1015 | 0.2  | 20  | 2.7 |
| 2020 | 1 | 16 | 11 | -6.8 | 158 | 643 | 469 | 1014 | 1.5  | 18  | 2.8 |
| 2020 | 1 | 16 | 12 | -6.8 | 166 | 697 | 547 | 1013 | 3    | 14  | 2.6 |
| 2020 | 1 | 16 | 13 | -6.8 | 152 | 743 | 565 | 1012 | 4.2  | 3   | 2.6 |
| 2020 | 1 | 16 | 14 | -6.7 | 135 | 745 | 519 | 1011 | 4.4  | 354 | 2.7 |
| 2020 | 1 | 16 | 15 | -6.2 | 172 | 292 | 295 | 1011 | 3.9  | 351 | 2.7 |
| 2020 | 1 | 16 | 16 | -3.8 | 118 | 127 | 155 | 1011 | 1.8  | 350 | 1.9 |
| 2020 | 1 | 16 | 17 | -4.7 | 45  | 73  | 54  | 1011 | -0.9 | 354 | 1.8 |
| 2020 | 1 | 16 | 18 | -5.3 | 0   | 0   | 0   | 1011 | -1.3 | 358 | 2.1 |
| 2020 | 1 | 16 | 19 | -5.5 | 0   | 0   | 0   | 1012 | -1.4 | 2   | 2.4 |
| 2020 | 1 | 16 | 20 | -5.5 | 0   | 0   | 0   | 1011 | -1.4 | 6   | 2.3 |
| 2020 | 1 | 16 | 21 | -5.4 | 0   | 0   | 0   | 1011 | -1.5 | 6   | 2.2 |
| 2020 | 1 | 16 | 22 | -5.5 | 0   | 0   | 0   | 1011 | -1.6 | 8   | 2.2 |
| 2020 | 1 | 16 | 23 | -5.6 | 0   | 0   | 0   | 1011 | -1.7 | 11  | 2.2 |
| 2020 | 1 | 17 | 0  | -5.7 | 0   | 0   | 0   | 1011 | -1.8 | 13  | 2.3 |
| 2020 | 1 | 17 | 1  | -5.6 | 0   | 0   | 0   | 1011 | -1.9 | 12  | 2.2 |
| 2020 | 1 | 17 | 2  | -5.6 | 0   | 0   | 0   | 1010 | -2.4 | 10  | 1.9 |
| 2020 | 1 | 17 | 3  | -5.7 | 0   | 0   | 0   | 1010 | -2.7 | 9   | 1.9 |
| 2020 | 1 | 17 | 4  | -5.8 | 0   | 0   | 0   | 1010 | -2.7 | 7   | 2   |
| 2020 | 1 | 17 | 5  | -5.8 | 0   | 0   | 0   | 1010 | -2.7 | 6   | 2   |
| 2020 | 1 | 17 | 6  | -5.8 | 0   | 0   | 0   | 1010 | -2.7 | 4   | 1.9 |
| 2020 | 1 | 17 | 7  | -5.9 | 0   | 0   | 0   | 1010 | -2.6 | 1   | 2   |
| 2020 | 1 | 17 | 8  | -6.3 | 17  | 0   | 17  | 1011 | -1.8 | 357 | 2.7 |
| 2020 | 1 | 17 | 9  | -6.2 | 89  | 127 | 118 | 1011 | -0.7 | 353 | 2.8 |
| 2020 | 1 | 17 | 10 | -7.2 | 153 | 240 | 244 | 1011 | 0.7  | 351 | 3.1 |
| 2020 | 1 | 17 | 11 | -7.5 | 218 | 144 | 288 | 1010 | 1.7  | 347 | 3.2 |
| 2020 | 1 | 17 | 12 | -7.6 | 205 | 446 | 450 | 1009 | 2.7  | 343 | 3.4 |
| 2020 | 1 | 17 | 13 | -7.3 | 202 | 623 | 550 | 1008 | 3.6  | 337 | 3.6 |



|      |   |    |    |      |     |     |     |      |      |     |     |
|------|---|----|----|------|-----|-----|-----|------|------|-----|-----|
| 2020 | 1 | 17 | 14 | -6.9 | 185 | 610 | 501 | 1008 | 4    | 332 | 3.9 |
| 2020 | 1 | 17 | 15 | -6.2 | 141 | 618 | 406 | 1008 | 3.6  | 331 | 3.9 |
| 2020 | 1 | 17 | 16 | -4.7 | 105 | 504 | 254 | 1008 | 2.2  | 332 | 3   |
| 2020 | 1 | 17 | 17 | -4.9 | 51  | 270 | 86  | 1008 | -1.4 | 336 | 2   |
| 2020 | 1 | 17 | 18 | -5.4 | 0   | 0   | 0   | 1008 | -2.5 | 343 | 1.9 |
| 2020 | 1 | 17 | 19 | -5.5 | 0   | 0   | 0   | 1008 | -2.8 | 348 | 1.8 |
| 2020 | 1 | 17 | 20 | -5.6 | 0   | 0   | 0   | 1009 | -3   | 350 | 1.7 |
| 2020 | 1 | 17 | 21 | -5.6 | 0   | 0   | 0   | 1009 | -3.2 | 350 | 1.7 |
| 2020 | 1 | 17 | 22 | -5.6 | 0   | 0   | 0   | 1009 | -3.4 | 350 | 1.7 |
| 2020 | 1 | 17 | 23 | -5.7 | 0   | 0   | 0   | 1009 | -3.5 | 347 | 1.8 |
| 2020 | 1 | 18 | 0  | -5.7 | 0   | 0   | 0   | 1009 | -3.6 | 344 | 1.8 |
| 2020 | 1 | 18 | 1  | -5.8 | 0   | 0   | 0   | 1009 | -3.7 | 346 | 1.9 |
| 2020 | 1 | 18 | 2  | -5.6 | 0   | 0   | 0   | 1009 | -3.6 | 350 | 1.8 |
| 2020 | 1 | 18 | 3  | -5.4 | 0   | 0   | 0   | 1008 | -3.3 | 352 | 1.9 |
| 2020 | 1 | 18 | 4  | -5.2 | 0   | 0   | 0   | 1008 | -3.2 | 352 | 1.9 |
| 2020 | 1 | 18 | 5  | -5   | 0   | 0   | 0   | 1008 | -3.2 | 352 | 1.9 |
| 2020 | 1 | 18 | 6  | -4.8 | 0   | 0   | 0   | 1008 | -3.1 | 353 | 1.9 |
| 2020 | 1 | 18 | 7  | -4.7 | 0   | 0   | 0   | 1009 | -3.1 | 354 | 2   |
| 2020 | 1 | 18 | 8  | -4   | 21  | 196 | 32  | 1009 | -1.1 | 354 | 3.2 |
| 2020 | 1 | 18 | 9  | -3.6 | 63  | 602 | 202 | 1009 | 1.3  | 350 | 4   |
| 2020 | 1 | 18 | 10 | -3.7 | 84  | 772 | 376 | 1009 | 3.4  | 347 | 4.7 |
| 2020 | 1 | 18 | 11 | -4.1 | 96  | 853 | 512 | 1009 | 4.6  | 345 | 4.8 |
| 2020 | 1 | 18 | 12 | -4.2 | 99  | 885 | 587 | 1008 | 5.6  | 341 | 4.7 |
| 2020 | 1 | 18 | 13 | -4   | 100 | 891 | 601 | 1008 | 6.1  | 337 | 4.6 |
| 2020 | 1 | 18 | 14 | -3.7 | 97  | 868 | 550 | 1008 | 6    | 334 | 4.5 |
| 2020 | 1 | 18 | 15 | -3.1 | 93  | 794 | 435 | 1008 | 5.3  | 335 | 4.1 |
| 2020 | 1 | 18 | 16 | -1.8 | 77  | 660 | 274 | 1008 | 3.3  | 330 | 2.7 |
| 2020 | 1 | 18 | 17 | -2.6 | 45  | 382 | 95  | 1008 | -0.6 | 325 | 1.8 |
| 2020 | 1 | 18 | 18 | -2.3 | 0   | 0   | 0   | 1009 | -1.7 | 327 | 1.7 |
| 2020 | 1 | 18 | 19 | -1.9 | 0   | 0   | 0   | 1009 | -1.9 | 332 | 1.6 |
| 2020 | 1 | 18 | 20 | -2.1 | 0   | 0   | 0   | 1009 | -2.1 | 341 | 1.4 |
| 2020 | 1 | 18 | 21 | -2.2 | 0   | 0   | 0   | 1009 | -2.2 | 347 | 1.4 |
| 2020 | 1 | 18 | 22 | -2.3 | 0   | 0   | 0   | 1009 | -2.3 | 344 | 1.3 |
| 2020 | 1 | 18 | 23 | -2.2 | 0   | 0   | 0   | 1009 | -2.2 | 337 | 1.2 |
| 2020 | 1 | 19 | 0  | -2.2 | 0   | 0   | 0   | 1008 | -2.1 | 334 | 1.2 |
| 2020 | 1 | 19 | 1  | -2.2 | 0   | 0   | 0   | 1008 | -1.8 | 331 | 1.1 |
| 2020 | 1 | 19 | 2  | -2.1 | 0   | 0   | 0   | 1008 | -1.1 | 325 | 1.1 |
| 2020 | 1 | 19 | 3  | -1.8 | 0   | 0   | 0   | 1008 | -0.6 | 318 | 1.2 |
| 2020 | 1 | 19 | 4  | -1.6 | 0   | 0   | 0   | 1007 | -0.2 | 312 | 1.3 |
| 2020 | 1 | 19 | 5  | -1.2 | 0   | 0   | 0   | 1007 | 0.2  | 308 | 1.3 |
| 2020 | 1 | 19 | 6  | -0.7 | 0   | 0   | 0   | 1008 | 0.6  | 307 | 1.3 |
| 2020 | 1 | 19 | 7  | -0.5 | 0   | 0   | 0   | 1008 | 0.7  | 306 | 1.2 |
| 2020 | 1 | 19 | 8  | 0.4  | 13  | 15  | 14  | 1008 | 1.6  | 303 | 1.2 |
| 2020 | 1 | 19 | 9  | 1.3  | 85  | 15  | 88  | 1008 | 3.1  | 300 | 1.5 |
| 2020 | 1 | 19 | 10 | 0.8  | 162 | 125 | 209 | 1008 | 4.4  | 292 | 2.7 |
| 2020 | 1 | 19 | 11 | 0.5  | 41  | 0   | 41  | 1008 | 5.9  | 289 | 3.9 |
| 2020 | 1 | 19 | 12 | 0.3  | 64  | 0   | 64  | 1007 | 6.8  | 287 | 4.6 |
| 2020 | 1 | 19 | 13 | 0.2  | 227 | 31  | 244 | 1006 | 7.1  | 288 | 4.9 |
| 2020 | 1 | 19 | 14 | 0.2  | 154 | 0   | 154 | 1006 | 6.9  | 291 | 5   |
| 2020 | 1 | 19 | 15 | 0.4  | 189 | 110 | 237 | 1006 | 6.3  | 294 | 4.5 |

|      |   |    |    |      |     |     |     |      |      |     |     |
|------|---|----|----|------|-----|-----|-----|------|------|-----|-----|
| 2020 | 1 | 19 | 16 | 0.9  | 120 | 186 | 177 | 1006 | 4.2  | 297 | 2.7 |
| 2020 | 1 | 19 | 17 | 0    | 56  | 109 | 70  | 1007 | 0.9  | 301 | 1.9 |
| 2020 | 1 | 19 | 18 | -0.4 | 0   | 0   | 0   | 1007 | -0.4 | 307 | 1.7 |
| 2020 | 1 | 19 | 19 | -0.9 | 0   | 0   | 0   | 1008 | -0.9 | 312 | 1.6 |
| 2020 | 1 | 19 | 20 | -1.3 | 0   | 0   | 0   | 1008 | -1.2 | 313 | 1.5 |
| 2020 | 1 | 19 | 21 | -1.8 | 0   | 0   | 0   | 1008 | -1.3 | 311 | 1.5 |
| 2020 | 1 | 19 | 22 | -2.1 | 0   | 0   | 0   | 1008 | -1.3 | 308 | 1.5 |
| 2020 | 1 | 19 | 23 | -2.2 | 0   | 0   | 0   | 1009 | -1.3 | 303 | 1.5 |
| 2020 | 1 | 20 | 0  | -2.3 | 0   | 0   | 0   | 1009 | -1.3 | 300 | 1.6 |
| 2020 | 1 | 20 | 1  | -2.1 | 0   | 0   | 0   | 1009 | -1.3 | 298 | 1.6 |
| 2020 | 1 | 20 | 2  | -2   | 0   | 0   | 0   | 1009 | -1.2 | 297 | 1.7 |
| 2020 | 1 | 20 | 3  | -1.9 | 0   | 0   | 0   | 1008 | -0.9 | 297 | 1.8 |
| 2020 | 1 | 20 | 4  | -1.7 | 0   | 0   | 0   | 1008 | -0.3 | 298 | 1.8 |
| 2020 | 1 | 20 | 5  | -1.7 | 0   | 0   | 0   | 1008 | 0    | 301 | 1.9 |
| 2020 | 1 | 20 | 6  | -1.7 | 0   | 0   | 0   | 1009 | 0.1  | 305 | 1.9 |
| 2020 | 1 | 20 | 7  | -2.4 | 0   | 0   | 0   | 1009 | -0.6 | 310 | 1.8 |
| 2020 | 1 | 20 | 8  | -1.3 | 14  | 0   | 14  | 1010 | 1.8  | 314 | 2.4 |
| 2020 | 1 | 20 | 9  | -1.7 | 80  | 481 | 192 | 1011 | 4    | 315 | 3.7 |
| 2020 | 1 | 20 | 10 | -2.6 | 100 | 694 | 366 | 1011 | 5.3  | 312 | 4.5 |
| 2020 | 1 | 20 | 11 | -2.7 | 114 | 781 | 499 | 1011 | 6    | 312 | 4.9 |
| 2020 | 1 | 20 | 12 | -2.6 | 132 | 793 | 573 | 1010 | 6.4  | 311 | 5.1 |
| 2020 | 1 | 20 | 13 | -2.7 | 132 | 808 | 591 | 1010 | 6.5  | 312 | 5.3 |
| 2020 | 1 | 20 | 14 | -2.9 | 232 | 260 | 369 | 1010 | 6.2  | 314 | 5.4 |
| 2020 | 1 | 20 | 15 | -3.1 | 191 | 116 | 242 | 1010 | 5.5  | 315 | 5   |
| 2020 | 1 | 20 | 16 | -2.6 | 99  | 564 | 272 | 1010 | 3.7  | 316 | 3.4 |
| 2020 | 1 | 20 | 17 | -3.3 | 55  | 299 | 97  | 1011 | -0.3 | 316 | 2   |
| 2020 | 1 | 20 | 18 | -3.9 | 0   | 0   | 0   | 1012 | -1.3 | 316 | 1.9 |
| 2020 | 1 | 20 | 19 | -3.7 | 0   | 0   | 0   | 1012 | -1.2 | 318 | 2.1 |
| 2020 | 1 | 20 | 20 | -3.2 | 0   | 0   | 0   | 1013 | -0.9 | 323 | 2.4 |
| 2020 | 1 | 20 | 21 | -3.1 | 0   | 0   | 0   | 1013 | -0.9 | 331 | 2.7 |
| 2020 | 1 | 20 | 22 | -3.6 | 0   | 0   | 0   | 1014 | -1.2 | 337 | 2.8 |
| 2020 | 1 | 20 | 23 | -4.5 | 0   | 0   | 0   | 1014 | -2   | 343 | 2.5 |
| 2020 | 1 | 21 | 0  | -5   | 0   | 0   | 0   | 1014 | -2.7 | 347 | 2.2 |
| 2020 | 1 | 21 | 1  | -5.2 | 0   | 0   | 0   | 1015 | -3   | 353 | 2.2 |
| 2020 | 1 | 21 | 2  | -5.4 | 0   | 0   | 0   | 1015 | -3.4 | 359 | 2.2 |
| 2020 | 1 | 21 | 3  | -5.7 | 0   | 0   | 0   | 1015 | -3.7 | 2   | 2.1 |
| 2020 | 1 | 21 | 4  | -6   | 0   | 0   | 0   | 1015 | -4.1 | 5   | 1.9 |
| 2020 | 1 | 21 | 5  | -6.4 | 0   | 0   | 0   | 1016 | -4.4 | 8   | 1.8 |
| 2020 | 1 | 21 | 6  | -6.7 | 0   | 0   | 0   | 1017 | -4.6 | 11  | 1.6 |
| 2020 | 1 | 21 | 7  | -7   | 0   | 0   | 0   | 1017 | -4.5 | 17  | 1.6 |
| 2020 | 1 | 21 | 8  | -7.5 | 22  | 308 | 40  | 1018 | -2.6 | 22  | 2.8 |
| 2020 | 1 | 21 | 9  | -7.7 | 54  | 707 | 221 | 1018 | -0.4 | 20  | 3.3 |
| 2020 | 1 | 21 | 10 | -7.9 | 70  | 862 | 402 | 1018 | 1.5  | 23  | 2.9 |
| 2020 | 1 | 21 | 11 | -7.7 | 78  | 934 | 541 | 1017 | 3.2  | 34  | 2.3 |
| 2020 | 1 | 21 | 12 | -7.1 | 83  | 963 | 621 | 1016 | 4.9  | 51  | 1.6 |
| 2020 | 1 | 21 | 13 | -6.8 | 83  | 957 | 630 | 1015 | 6.4  | 87  | 1.2 |
| 2020 | 1 | 21 | 14 | -6   | 81  | 938 | 579 | 1014 | 7.2  | 132 | 1.5 |
| 2020 | 1 | 21 | 15 | -4.4 | 76  | 882 | 466 | 1014 | 7    | 149 | 1.8 |
| 2020 | 1 | 21 | 16 | -0.5 | 64  | 773 | 303 | 1014 | 4.6  | 155 | 1.1 |
| 2020 | 1 | 21 | 17 | -4.5 | 41  | 513 | 114 | 1015 | 0.9  | 158 | 1.4 |

|      |   |    |    |      |     |     |     |      |      |     |     |
|------|---|----|----|------|-----|-----|-----|------|------|-----|-----|
| 2020 | 1 | 21 | 18 | -5.5 | 0   | 0   | 0   | 1015 | -0.2 | 153 | 1.4 |
| 2020 | 1 | 21 | 19 | -5.7 | 0   | 0   | 0   | 1016 | -0.3 | 156 | 1.3 |
| 2020 | 1 | 21 | 20 | -5.8 | 0   | 0   | 0   | 1016 | 0    | 161 | 1.1 |
| 2020 | 1 | 21 | 21 | -4.5 | 0   | 0   | 0   | 1016 | 0.4  | 127 | 1   |
| 2020 | 1 | 21 | 22 | -4.7 | 0   | 0   | 0   | 1015 | -0.1 | 117 | 1.1 |
| 2020 | 1 | 21 | 23 | -4.8 | 0   | 0   | 0   | 1015 | -0.1 | 111 | 1.1 |
| 2020 | 1 | 22 | 0  | -4.6 | 0   | 0   | 0   | 1015 | -0.3 | 105 | 1.1 |
| 2020 | 1 | 22 | 1  | -3.9 | 0   | 0   | 0   | 1014 | -0.4 | 102 | 1.2 |
| 2020 | 1 | 22 | 2  | -3.1 | 0   | 0   | 0   | 1014 | 0    | 102 | 1.2 |
| 2020 | 1 | 22 | 3  | -2.4 | 0   | 0   | 0   | 1014 | 0.2  | 102 | 1.2 |
| 2020 | 1 | 22 | 4  | -1.7 | 0   | 0   | 0   | 1013 | 0.4  | 100 | 1.3 |
| 2020 | 1 | 22 | 5  | -0.9 | 0   | 0   | 0   | 1013 | 0.5  | 98  | 1.4 |
| 2020 | 1 | 22 | 6  | -0.4 | 0   | 0   | 0   | 1013 | 0.7  | 97  | 1.5 |
| 2020 | 1 | 22 | 7  | 0    | 0   | 0   | 0   | 1013 | 0.9  | 93  | 1.6 |
| 2020 | 1 | 22 | 8  | 1.3  | 4   | 0   | 4   | 1012 | 2.7  | 87  | 2.4 |
| 2020 | 1 | 22 | 9  | 2.4  | 10  | 0   | 10  | 1012 | 4.4  | 87  | 2.9 |
| 2020 | 1 | 22 | 10 | 3.5  | 33  | 0   | 33  | 1012 | 5.6  | 89  | 2.8 |
| 2020 | 1 | 22 | 11 | 4.6  | 26  | 0   | 26  | 1011 | 7    | 96  | 3   |
| 2020 | 1 | 22 | 12 | 5    | 50  | 0   | 50  | 1010 | 7.1  | 99  | 2.7 |
| 2020 | 1 | 22 | 13 | 4.9  | 69  | 0   | 69  | 1009 | 6.3  | 89  | 2.5 |
| 2020 | 1 | 22 | 14 | 4.7  | 79  | 0   | 79  | 1009 | 5.6  | 78  | 2.4 |
| 2020 | 1 | 22 | 15 | 4.3  | 21  | 0   | 21  | 1008 | 4.9  | 76  | 2.3 |
| 2020 | 1 | 22 | 16 | 3.9  | 13  | 0   | 13  | 1008 | 4.2  | 77  | 2.4 |
| 2020 | 1 | 22 | 17 | 3.4  | 13  | 0   | 13  | 1009 | 3.4  | 76  | 2.3 |
| 2020 | 1 | 22 | 18 | 3.2  | 0   | 0   | 0   | 1009 | 3.2  | 71  | 2.5 |
| 2020 | 1 | 22 | 19 | 3    | 0   | 0   | 0   | 1009 | 3.3  | 74  | 2.9 |
| 2020 | 1 | 22 | 20 | 3    | 0   | 0   | 0   | 1008 | 3.3  | 78  | 2.8 |
| 2020 | 1 | 22 | 21 | 2.9  | 0   | 0   | 0   | 1008 | 3.2  | 76  | 2.6 |
| 2020 | 1 | 22 | 22 | 2.7  | 0   | 0   | 0   | 1008 | 3    | 70  | 2.2 |
| 2020 | 1 | 22 | 23 | 2.6  | 0   | 0   | 0   | 1008 | 2.8  | 63  | 2   |
| 2020 | 1 | 23 | 0  | 2.5  | 0   | 0   | 0   | 1007 | 2.7  | 54  | 1.8 |
| 2020 | 1 | 23 | 1  | 2.5  | 0   | 0   | 0   | 1007 | 2.8  | 57  | 2   |
| 2020 | 1 | 23 | 2  | 2.4  | 0   | 0   | 0   | 1006 | 2.5  | 60  | 1.7 |
| 2020 | 1 | 23 | 3  | 1.9  | 0   | 0   | 0   | 1006 | 1.9  | 54  | 1.2 |
| 2020 | 1 | 23 | 4  | 1.5  | 0   | 0   | 0   | 1007 | 1.5  | 37  | 1.1 |
| 2020 | 1 | 23 | 5  | 1.6  | 0   | 0   | 0   | 1008 | 1.6  | 26  | 1.2 |
| 2020 | 1 | 23 | 6  | 2    | 0   | 0   | 0   | 1008 | 2.1  | 26  | 1.4 |
| 2020 | 1 | 23 | 7  | 2.1  | 0   | 0   | 0   | 1008 | 2.3  | 29  | 1.4 |
| 2020 | 1 | 23 | 8  | 3.1  | 25  | 81  | 30  | 1009 | 3.9  | 27  | 2   |
| 2020 | 1 | 23 | 9  | 4.1  | 68  | 0   | 68  | 1009 | 5.3  | 10  | 2.2 |
| 2020 | 1 | 23 | 10 | 5.8  | 128 | 577 | 353 | 1009 | 7.6  | 354 | 2.2 |
| 2020 | 1 | 23 | 11 | 6.8  | 215 | 63  | 246 | 1009 | 9.9  | 351 | 2.6 |
| 2020 | 1 | 23 | 12 | 6.7  | 188 | 7   | 192 | 1009 | 10.4 | 346 | 3.1 |
| 2020 | 1 | 23 | 13 | 6.5  | 233 | 397 | 462 | 1008 | 10.8 | 345 | 3.6 |
| 2020 | 1 | 23 | 14 | 6.1  | 242 | 226 | 364 | 1008 | 10.8 | 351 | 3.8 |
| 2020 | 1 | 23 | 15 | 5.5  | 134 | 650 | 426 | 1009 | 10.3 | 353 | 3.6 |
| 2020 | 1 | 23 | 16 | 5.1  | 129 | 154 | 177 | 1009 | 8.9  | 351 | 2.9 |
| 2020 | 1 | 23 | 17 | 3.8  | 51  | 227 | 85  | 1010 | 5.8  | 346 | 2.2 |
| 2020 | 1 | 23 | 18 | 2.2  | 0   | 0   | 0   | 1011 | 4.4  | 350 | 2.6 |
| 2020 | 1 | 23 | 19 | 1.5  | 0   | 0   | 0   | 1012 | 3.7  | 359 | 2.7 |

|      |   |    |    |      |     |     |     |      |      |     |     |
|------|---|----|----|------|-----|-----|-----|------|------|-----|-----|
| 2020 | 1 | 23 | 20 | 1.1  | 0   | 0   | 0   | 1012 | 3.2  | 4   | 2.7 |
| 2020 | 1 | 23 | 21 | 0.8  | 0   | 0   | 0   | 1013 | 2.7  | 4   | 2.6 |
| 2020 | 1 | 23 | 22 | 0.5  | 0   | 0   | 0   | 1013 | 2.4  | 6   | 2.6 |
| 2020 | 1 | 23 | 23 | 0.3  | 0   | 0   | 0   | 1013 | 2.1  | 6   | 2.7 |
| 2020 | 1 | 24 | 0  | 0.2  | 0   | 0   | 0   | 1013 | 1.9  | 3   | 2.7 |
| 2020 | 1 | 24 | 1  | 0.1  | 0   | 0   | 0   | 1014 | 1.7  | 5   | 2.7 |
| 2020 | 1 | 24 | 2  | 0    | 0   | 0   | 0   | 1014 | 1.4  | 7   | 2.8 |
| 2020 | 1 | 24 | 3  | -0.1 | 0   | 0   | 0   | 1014 | 1.1  | 6   | 3   |
| 2020 | 1 | 24 | 4  | 0    | 0   | 0   | 0   | 1014 | 0.9  | 5   | 3.3 |
| 2020 | 1 | 24 | 5  | 0    | 0   | 0   | 0   | 1015 | 0.6  | 5   | 3.4 |
| 2020 | 1 | 24 | 6  | -0.2 | 0   | 0   | 0   | 1015 | 0    | 8   | 3.2 |
| 2020 | 1 | 24 | 7  | -0.7 | 0   | 0   | 0   | 1016 | -0.5 | 10  | 3.4 |
| 2020 | 1 | 24 | 8  | -0.6 | 22  | 69  | 26  | 1016 | 0.5  | 11  | 3.9 |
| 2020 | 1 | 24 | 9  | -0.1 | 93  | 374 | 183 | 1016 | 2.6  | 11  | 3.9 |
| 2020 | 1 | 24 | 10 | 0.5  | 126 | 578 | 353 | 1016 | 5.3  | 11  | 4   |
| 2020 | 1 | 24 | 11 | 0.5  | 140 | 695 | 491 | 1016 | 7.8  | 14  | 3.8 |
| 2020 | 1 | 24 | 12 | 0.3  | 115 | 840 | 592 | 1015 | 9.8  | 19  | 3.6 |
| 2020 | 1 | 24 | 13 | 0.6  | 119 | 840 | 607 | 1014 | 11.2 | 16  | 3.3 |
| 2020 | 1 | 24 | 14 | 1    | 192 | 482 | 453 | 1014 | 11.5 | 8   | 2.8 |
| 2020 | 1 | 24 | 15 | 1.8  | 168 | 392 | 346 | 1014 | 10.8 | 357 | 2.4 |
| 2020 | 1 | 24 | 16 | 3.6  | 81  | 564 | 261 | 1014 | 8.3  | 342 | 1.8 |
| 2020 | 1 | 24 | 17 | 2.3  | 50  | 274 | 92  | 1015 | 5.5  | 346 | 2.1 |
| 2020 | 1 | 24 | 18 | 1.4  | 0   | 0   | 0   | 1015 | 4.4  | 359 | 2.3 |
| 2020 | 1 | 24 | 19 | 1.3  | 0   | 0   | 0   | 1016 | 3.8  | 10  | 2   |
| 2020 | 1 | 24 | 20 | 1.4  | 0   | 0   | 0   | 1016 | 3.4  | 30  | 1.5 |
| 2020 | 1 | 24 | 21 | 1.5  | 0   | 0   | 0   | 1016 | 3.3  | 54  | 1.4 |
| 2020 | 1 | 24 | 22 | 1.7  | 0   | 0   | 0   | 1016 | 3.4  | 79  | 1.4 |
| 2020 | 1 | 24 | 23 | 1.8  | 0   | 0   | 0   | 1016 | 2.5  | 93  | 1.4 |
| 2020 | 1 | 25 | 0  | 2    | 0   | 0   | 0   | 1016 | 2    | 91  | 1.4 |
| 2020 | 1 | 25 | 1  | 1.9  | 0   | 0   | 0   | 1016 | 1.9  | 83  | 1.6 |
| 2020 | 1 | 25 | 2  | 1.9  | 0   | 0   | 0   | 1016 | 1.9  | 81  | 1.6 |
| 2020 | 1 | 25 | 3  | 1.8  | 0   | 0   | 0   | 1016 | 2.1  | 80  | 1.5 |
| 2020 | 1 | 25 | 4  | 1.9  | 0   | 0   | 0   | 1016 | 2.2  | 78  | 1.5 |
| 2020 | 1 | 25 | 5  | 1.7  | 0   | 0   | 0   | 1016 | 1.7  | 77  | 1.6 |
| 2020 | 1 | 25 | 6  | 1    | 0   | 0   | 0   | 1016 | 1    | 77  | 1.6 |
| 2020 | 1 | 25 | 7  | 0.6  | 0   | 0   | 0   | 1016 | 0.6  | 76  | 1.7 |
| 2020 | 1 | 25 | 8  | 2.9  | 16  | 0   | 16  | 1016 | 3.8  | 75  | 2.6 |
| 2020 | 1 | 25 | 9  | 4.2  | 73  | 0   | 73  | 1017 | 6.5  | 74  | 3   |
| 2020 | 1 | 25 | 10 | 5.2  | 142 | 9   | 146 | 1016 | 9.5  | 85  | 3.2 |
| 2020 | 1 | 25 | 11 | 5.1  | 216 | 59  | 246 | 1016 | 10.8 | 80  | 2.9 |
| 2020 | 1 | 25 | 12 | 4.7  | 262 | 105 | 322 | 1015 | 11.6 | 74  | 2.3 |
| 2020 | 1 | 25 | 13 | 4.1  | 256 | 60  | 291 | 1014 | 11.6 | 67  | 1.9 |
| 2020 | 1 | 25 | 14 | 3.9  | 183 | 7   | 186 | 1013 | 11.5 | 58  | 1.8 |
| 2020 | 1 | 25 | 15 | 4    | 140 | 0   | 140 | 1014 | 11   | 46  | 1   |
| 2020 | 1 | 25 | 16 | 5.6  | 63  | 0   | 63  | 1014 | 9.3  | 18  | 0.6 |
| 2020 | 1 | 25 | 17 | 4.5  | 24  | 0   | 24  | 1014 | 7.3  | 6   | 0.9 |
| 2020 | 1 | 25 | 18 | 3.9  | 0   | 0   | 0   | 1014 | 6.2  | 7   | 1   |
| 2020 | 1 | 25 | 19 | 3.6  | 0   | 0   | 0   | 1015 | 5.6  | 13  | 1.1 |
| 2020 | 1 | 25 | 20 | 3.3  | 0   | 0   | 0   | 1015 | 5    | 18  | 1.1 |
| 2020 | 1 | 25 | 21 | 2.8  | 0   | 0   | 0   | 1014 | 4.4  | 21  | 1.1 |

|      |   |    |    |     |     |     |     |      |      |     |     |
|------|---|----|----|-----|-----|-----|-----|------|------|-----|-----|
| 2020 | 1 | 25 | 22 | 2.4 | 0   | 0   | 0   | 1014 | 4    | 27  | 1.1 |
| 2020 | 1 | 25 | 23 | 1.9 | 0   | 0   | 0   | 1014 | 3.5  | 32  | 1.1 |
| 2020 | 1 | 26 | 0  | 1.6 | 0   | 0   | 0   | 1014 | 3.2  | 51  | 1.1 |
| 2020 | 1 | 26 | 1  | 1.4 | 0   | 0   | 0   | 1014 | 2.8  | 65  | 1.1 |
| 2020 | 1 | 26 | 2  | 1.6 | 0   | 0   | 0   | 1014 | 3    | 67  | 1.1 |
| 2020 | 1 | 26 | 3  | 1.7 | 0   | 0   | 0   | 1014 | 3    | 61  | 1   |
| 2020 | 1 | 26 | 4  | 1.7 | 0   | 0   | 0   | 1013 | 2.6  | 57  | 1.2 |
| 2020 | 1 | 26 | 5  | 1.3 | 0   | 0   | 0   | 1013 | 1.3  | 55  | 1.3 |
| 2020 | 1 | 26 | 6  | 0.9 | 0   | 0   | 0   | 1013 | 0.9  | 57  | 1.4 |
| 2020 | 1 | 26 | 7  | 0.7 | 0   | 0   | 0   | 1013 | 1.1  | 60  | 1.3 |
| 2020 | 1 | 26 | 8  | 1.6 | 24  | 129 | 33  | 1013 | 3.4  | 62  | 1.8 |
| 2020 | 1 | 26 | 9  | 1.9 | 80  | 363 | 169 | 1013 | 5    | 70  | 2.7 |
| 2020 | 1 | 26 | 10 | 2.3 | 148 | 354 | 289 | 1013 | 8    | 80  | 3.5 |
| 2020 | 1 | 26 | 11 | 2.3 | 188 | 433 | 409 | 1012 | 10   | 81  | 4.1 |
| 2020 | 1 | 26 | 12 | 2.5 | 263 | 226 | 393 | 1011 | 10.9 | 83  | 4   |
| 2020 | 1 | 26 | 13 | 2.8 | 253 | 331 | 448 | 1011 | 10.1 | 73  | 3.1 |
| 2020 | 1 | 26 | 14 | 3.6 | 251 | 114 | 313 | 1010 | 9.8  | 73  | 2.9 |
| 2020 | 1 | 26 | 15 | 4.9 | 165 | 11  | 170 | 1010 | 9.4  | 69  | 2.2 |
| 2020 | 1 | 26 | 16 | 5.6 | 122 | 20  | 129 | 1010 | 7.9  | 63  | 1.4 |
| 2020 | 1 | 26 | 17 | 4.5 | 48  | 0   | 48  | 1010 | 6.3  | 64  | 1.5 |
| 2020 | 1 | 26 | 18 | 4.2 | 0   | 0   | 0   | 1011 | 6    | 64  | 1.9 |
| 2020 | 1 | 26 | 19 | 3.9 | 0   | 0   | 0   | 1011 | 5.7  | 61  | 2.2 |
| 2020 | 1 | 26 | 20 | 3.6 | 0   | 0   | 0   | 1010 | 5.3  | 60  | 2.3 |
| 2020 | 1 | 26 | 21 | 3.4 | 0   | 0   | 0   | 1009 | 5.1  | 70  | 2.6 |
| 2020 | 1 | 26 | 22 | 3.4 | 0   | 0   | 0   | 1009 | 5.2  | 83  | 3.3 |
| 2020 | 1 | 26 | 23 | 3.8 | 0   | 0   | 0   | 1008 | 5.3  | 84  | 3.7 |
| 2020 | 1 | 27 | 0  | 4   | 0   | 0   | 0   | 1007 | 5.2  | 76  | 3.9 |
| 2020 | 1 | 27 | 1  | 4.1 | 0   | 0   | 0   | 1006 | 4.9  | 64  | 3.7 |
| 2020 | 1 | 27 | 2  | 4.1 | 0   | 0   | 0   | 1005 | 4.8  | 63  | 3.9 |
| 2020 | 1 | 27 | 3  | 4.1 | 0   | 0   | 0   | 1005 | 4.6  | 61  | 3.3 |
| 2020 | 1 | 27 | 4  | 4   | 0   | 0   | 0   | 1005 | 4.5  | 58  | 2.8 |
| 2020 | 1 | 27 | 5  | 4.1 | 0   | 0   | 0   | 1004 | 4.6  | 57  | 3.1 |
| 2020 | 1 | 27 | 6  | 4   | 0   | 0   | 0   | 1003 | 4.6  | 57  | 2.7 |
| 2020 | 1 | 27 | 7  | 4   | 0   | 0   | 0   | 1003 | 4.6  | 52  | 2.8 |
| 2020 | 1 | 27 | 8  | 4   | 13  | 0   | 13  | 1003 | 5    | 51  | 3.9 |
| 2020 | 1 | 27 | 9  | 4.1 | 50  | 0   | 50  | 1003 | 5.3  | 50  | 4.5 |
| 2020 | 1 | 27 | 10 | 4.2 | 32  | 0   | 32  | 1003 | 5.9  | 51  | 5   |
| 2020 | 1 | 27 | 11 | 4.3 | 64  | 0   | 64  | 1003 | 6.5  | 51  | 5.3 |
| 2020 | 1 | 27 | 12 | 4.1 | 33  | 0   | 33  | 1002 | 7    | 51  | 5.2 |
| 2020 | 1 | 27 | 13 | 3.9 | 55  | 0   | 55  | 1001 | 7.4  | 48  | 5.2 |
| 2020 | 1 | 27 | 14 | 3.6 | 75  | 0   | 75  | 1001 | 7.4  | 42  | 4.9 |
| 2020 | 1 | 27 | 15 | 3.5 | 77  | 0   | 77  | 1002 | 6.9  | 30  | 4.2 |
| 2020 | 1 | 27 | 16 | 3.6 | 14  | 0   | 14  | 1002 | 5.9  | 12  | 3.8 |
| 2020 | 1 | 27 | 17 | 3.4 | 29  | 0   | 29  | 1002 | 4.8  | 7   | 3.7 |
| 2020 | 1 | 27 | 18 | 2.9 | 0   | 0   | 0   | 1003 | 4    | 5   | 3.6 |
| 2020 | 1 | 27 | 19 | 2.4 | 0   | 0   | 0   | 1003 | 3.3  | 360 | 3.7 |
| 2020 | 1 | 27 | 20 | 1.8 | 0   | 0   | 0   | 1003 | 2.6  | 352 | 3.8 |
| 2020 | 1 | 27 | 21 | 1.4 | 0   | 0   | 0   | 1003 | 1.9  | 348 | 3.8 |
| 2020 | 1 | 27 | 22 | 1   | 0   | 0   | 0   | 1003 | 1.4  | 349 | 3.7 |
| 2020 | 1 | 27 | 23 | 0.8 | 0   | 0   | 0   | 1004 | 1.2  | 350 | 3.9 |

|      |   |    |    |     |     |     |     |      |      |     |     |
|------|---|----|----|-----|-----|-----|-----|------|------|-----|-----|
| 2020 | 1 | 28 | 0  | 0.7 | 0   | 0   | 0   | 1004 | 1.1  | 355 | 3.7 |
| 2020 | 1 | 28 | 1  | 0.5 | 0   | 0   | 0   | 1003 | 0.9  | 360 | 3.5 |
| 2020 | 1 | 28 | 2  | 0.5 | 0   | 0   | 0   | 1003 | 0.9  | 4   | 3.2 |
| 2020 | 1 | 28 | 3  | 0.4 | 0   | 0   | 0   | 1003 | 0.8  | 9   | 3   |
| 2020 | 1 | 28 | 4  | 0.5 | 0   | 0   | 0   | 1003 | 0.8  | 15  | 2.5 |
| 2020 | 1 | 28 | 5  | 0.5 | 0   | 0   | 0   | 1003 | 0.7  | 21  | 2   |
| 2020 | 1 | 28 | 6  | 0.4 | 0   | 0   | 0   | 1003 | 0.4  | 26  | 1.4 |
| 2020 | 1 | 28 | 7  | 0.4 | 0   | 0   | 0   | 1003 | 0.4  | 33  | 1.2 |
| 2020 | 1 | 28 | 8  | 1.6 | 25  | 36  | 28  | 1004 | 3.1  | 42  | 1.9 |
| 2020 | 1 | 28 | 9  | 2.6 | 92  | 246 | 154 | 1004 | 5.8  | 44  | 2   |
| 2020 | 1 | 28 | 10 | 3.1 | 168 | 225 | 259 | 1004 | 8.2  | 49  | 1.7 |
| 2020 | 1 | 28 | 11 | 3.3 | 231 | 211 | 340 | 1004 | 9.8  | 27  | 0.9 |
| 2020 | 1 | 28 | 12 | 3.5 | 261 | 274 | 420 | 1003 | 10.8 | 313 | 1   |
| 2020 | 1 | 28 | 13 | 3.6 | 130 | 802 | 608 | 1003 | 10.6 | 294 | 1.6 |
| 2020 | 1 | 28 | 14 | 3.7 | 136 | 758 | 558 | 1002 | 10.2 | 292 | 2   |
| 2020 | 1 | 28 | 15 | 4.2 | 122 | 704 | 451 | 1002 | 9.6  | 295 | 2   |
| 2020 | 1 | 28 | 16 | 5.1 | 55  | 0   | 55  | 1003 | 8.9  | 299 | 1.6 |
| 2020 | 1 | 28 | 17 | 4.8 | 13  | 0   | 13  | 1003 | 6.5  | 308 | 1.1 |
| 2020 | 1 | 28 | 18 | 3.9 | 0   | 0   | 0   | 1003 | 5.3  | 324 | 1.1 |
| 2020 | 1 | 28 | 19 | 3.5 | 0   | 0   | 0   | 1004 | 4.7  | 339 | 1.1 |
| 2020 | 1 | 28 | 20 | 3.3 | 0   | 0   | 0   | 1004 | 4.3  | 352 | 1   |
| 2020 | 1 | 28 | 21 | 3.2 | 0   | 0   | 0   | 1004 | 4.1  | 4   | 0.9 |
| 2020 | 1 | 28 | 22 | 3.1 | 0   | 0   | 0   | 1004 | 4.4  | 14  | 0.8 |
| 2020 | 1 | 28 | 23 | 3.1 | 0   | 0   | 0   | 1004 | 4.5  | 21  | 0.7 |
| 2020 | 1 | 29 | 0  | 3.1 | 0   | 0   | 0   | 1004 | 4.3  | 26  | 0.5 |
| 2020 | 1 | 29 | 1  | 3.1 | 0   | 0   | 0   | 1004 | 3.9  | 39  | 0.4 |
| 2020 | 1 | 29 | 2  | 3.2 | 0   | 0   | 0   | 1004 | 3.7  | 44  | 0.4 |
| 2020 | 1 | 29 | 3  | 3.2 | 0   | 0   | 0   | 1003 | 3.6  | 42  | 0.4 |
| 2020 | 1 | 29 | 4  | 3.2 | 0   | 0   | 0   | 1003 | 3.6  | 37  | 0.3 |
| 2020 | 1 | 29 | 5  | 3.2 | 0   | 0   | 0   | 1003 | 3.7  | 33  | 0.2 |
| 2020 | 1 | 29 | 6  | 3.3 | 0   | 0   | 0   | 1003 | 3.7  | 37  | 0.1 |
| 2020 | 1 | 29 | 7  | 3.4 | 0   | 0   | 0   | 1003 | 3.8  | 77  | 0   |
| 2020 | 1 | 29 | 8  | 3.9 | 13  | 0   | 13  | 1003 | 4.6  | 277 | 0.1 |
| 2020 | 1 | 29 | 9  | 4.4 | 67  | 0   | 67  | 1003 | 6.1  | 233 | 0.3 |
| 2020 | 1 | 29 | 10 | 4.6 | 171 | 77  | 202 | 1003 | 7.8  | 244 | 0.6 |
| 2020 | 1 | 29 | 11 | 4.3 | 136 | 0   | 136 | 1002 | 8.7  | 256 | 0.8 |
| 2020 | 1 | 29 | 12 | 4.2 | 74  | 0   | 74  | 1001 | 9.1  | 262 | 1.3 |
| 2020 | 1 | 29 | 13 | 4.1 | 54  | 0   | 54  | 1001 | 8.9  | 269 | 1.7 |
| 2020 | 1 | 29 | 14 | 4.3 | 108 | 0   | 108 | 1000 | 8.4  | 277 | 2   |
| 2020 | 1 | 29 | 15 | 4.5 | 38  | 0   | 38  | 1000 | 7.9  | 291 | 2.1 |
| 2020 | 1 | 29 | 16 | 4.9 | 23  | 0   | 23  | 1000 | 7.1  | 304 | 2   |
| 2020 | 1 | 29 | 17 | 4.8 | 9   | 0   | 9   | 1001 | 6    | 312 | 1.7 |
| 2020 | 1 | 29 | 18 | 4.3 | 0   | 0   | 0   | 1001 | 5.3  | 321 | 1.9 |
| 2020 | 1 | 29 | 19 | 3.7 | 0   | 0   | 0   | 1001 | 4.8  | 329 | 1.9 |
| 2020 | 1 | 29 | 20 | 3.2 | 0   | 0   | 0   | 1001 | 4.2  | 336 | 1.9 |
| 2020 | 1 | 29 | 21 | 2.7 | 0   | 0   | 0   | 1001 | 3.5  | 340 | 1.8 |
| 2020 | 1 | 29 | 22 | 2.3 | 0   | 0   | 0   | 1001 | 2.4  | 341 | 1.5 |
| 2020 | 1 | 29 | 23 | 1.5 | 0   | 0   | 0   | 1001 | 1.5  | 344 | 1.4 |
| 2020 | 1 | 30 | 0  | 1.1 | 0   | 0   | 0   | 1001 | 1.1  | 346 | 1.4 |
| 2020 | 1 | 30 | 1  | 0.9 | 0   | 0   | 0   | 1001 | 0.9  | 347 | 1.6 |

|      |   |    |    |      |     |     |     |      |      |     |     |
|------|---|----|----|------|-----|-----|-----|------|------|-----|-----|
| 2020 | 1 | 30 | 2  | 0.7  | 0   | 0   | 0   | 1000 | 0.7  | 349 | 1.5 |
| 2020 | 1 | 30 | 3  | 0.6  | 0   | 0   | 0   | 1000 | 0.6  | 348 | 1.5 |
| 2020 | 1 | 30 | 4  | 0.6  | 0   | 0   | 0   | 1000 | 0.6  | 348 | 1.4 |
| 2020 | 1 | 30 | 5  | 0.6  | 0   | 0   | 0   | 1000 | 0.6  | 347 | 1.4 |
| 2020 | 1 | 30 | 6  | 0.6  | 0   | 0   | 0   | 1000 | 0.6  | 345 | 1.4 |
| 2020 | 1 | 30 | 7  | 0.6  | 0   | 0   | 0   | 1001 | 0.6  | 343 | 1.4 |
| 2020 | 1 | 30 | 8  | 1.7  | 29  | 172 | 42  | 1001 | 2.4  | 340 | 2.1 |
| 2020 | 1 | 30 | 9  | 2    | 75  | 547 | 215 | 1001 | 4.9  | 339 | 2.6 |
| 2020 | 1 | 30 | 10 | 1.5  | 163 | 38  | 179 | 1001 | 7    | 339 | 3.1 |
| 2020 | 1 | 30 | 11 | 0.8  | 206 | 30  | 222 | 1001 | 7.7  | 335 | 3.5 |
| 2020 | 1 | 30 | 12 | 0.5  | 275 | 133 | 354 | 1001 | 8.2  | 329 | 3.8 |
| 2020 | 1 | 30 | 13 | 0.5  | 169 | 1   | 169 | 1001 | 8.4  | 322 | 4   |
| 2020 | 1 | 30 | 14 | 0.5  | 135 | 770 | 569 | 1001 | 8.3  | 318 | 4.3 |
| 2020 | 1 | 30 | 15 | 0.6  | 151 | 619 | 445 | 1001 | 7.9  | 315 | 4.4 |
| 2020 | 1 | 30 | 16 | 1.1  | 124 | 487 | 291 | 1001 | 6.8  | 312 | 4   |
| 2020 | 1 | 30 | 17 | 1.9  | 70  | 275 | 118 | 1002 | 4.4  | 307 | 2.8 |
| 2020 | 1 | 30 | 18 | 1.9  | 0   | 0   | 0   | 1002 | 2.8  | 307 | 2.6 |
| 2020 | 1 | 30 | 19 | 1.9  | 0   | 0   | 0   | 1003 | 1.9  | 309 | 2.2 |
| 2020 | 1 | 30 | 20 | 1    | 0   | 0   | 0   | 1004 | 1    | 312 | 1.9 |
| 2020 | 1 | 30 | 21 | 0.3  | 0   | 0   | 0   | 1004 | 0.3  | 314 | 1.6 |
| 2020 | 1 | 30 | 22 | -0.3 | 0   | 0   | 0   | 1004 | -0.3 | 316 | 1.5 |
| 2020 | 1 | 30 | 23 | -0.7 | 0   | 0   | 0   | 1005 | -0.7 | 317 | 1.4 |
| 2020 | 1 | 31 | 0  | -1.1 | 0   | 0   | 0   | 1005 | -1.1 | 318 | 1.4 |
| 2020 | 1 | 31 | 1  | -1.1 | 0   | 0   | 0   | 1005 | -1.1 | 319 | 1.4 |
| 2020 | 1 | 31 | 2  | -0.7 | 0   | 0   | 0   | 1005 | -0.7 | 323 | 1.3 |
| 2020 | 1 | 31 | 3  | -0.2 | 0   | 0   | 0   | 1005 | -0.2 | 327 | 1.3 |
| 2020 | 1 | 31 | 4  | -0.1 | 0   | 0   | 0   | 1005 | -0.1 | 330 | 1.2 |
| 2020 | 1 | 31 | 5  | 0    | 0   | 0   | 0   | 1005 | 0    | 332 | 1.2 |
| 2020 | 1 | 31 | 6  | 0.1  | 0   | 0   | 0   | 1006 | 0.1  | 333 | 1.1 |
| 2020 | 1 | 31 | 7  | 0.3  | 0   | 0   | 0   | 1006 | 0.3  | 331 | 1.1 |
| 2020 | 1 | 31 | 8  | 1.5  | 12  | 0   | 12  | 1007 | 2.8  | 326 | 1.4 |
| 2020 | 1 | 31 | 9  | 0.8  | 58  | 0   | 58  | 1007 | 4.5  | 318 | 2.5 |
| 2020 | 1 | 31 | 10 | 0.3  | 177 | 123 | 228 | 1008 | 5.7  | 312 | 2.7 |
| 2020 | 1 | 31 | 11 | 0.2  | 224 | 57  | 254 | 1008 | 6.8  | 306 | 2.9 |
| 2020 | 1 | 31 | 12 | 0.1  | 271 | 90  | 324 | 1007 | 7.4  | 301 | 3.3 |
| 2020 | 1 | 31 | 13 | 0.1  | 273 | 74  | 319 | 1007 | 7.6  | 298 | 3.8 |
| 2020 | 1 | 31 | 14 | -0.1 | 194 | 9   | 199 | 1007 | 7.2  | 299 | 4.2 |
| 2020 | 1 | 31 | 15 | -0.4 | 212 | 115 | 267 | 1007 | 6.3  | 301 | 4.3 |
| 2020 | 1 | 31 | 16 | -0.5 | 123 | 533 | 307 | 1007 | 5    | 305 | 3.9 |
| 2020 | 1 | 31 | 17 | -0.1 | 71  | 331 | 129 | 1008 | 2.9  | 308 | 2.5 |
| 2020 | 1 | 31 | 18 | -0.8 | 0   | 0   | 0   | 1009 | 0.7  | 313 | 1.6 |
| 2020 | 1 | 31 | 19 | -1.4 | 0   | 0   | 0   | 1009 | -0.3 | 319 | 1.4 |
| 2020 | 1 | 31 | 20 | -1.8 | 0   | 0   | 0   | 1010 | -1   | 324 | 1.3 |
| 2020 | 1 | 31 | 21 | -2   | 0   | 0   | 0   | 1010 | -1.5 | 327 | 1.3 |
| 2020 | 1 | 31 | 22 | -2.2 | 0   | 0   | 0   | 1010 | -1.9 | 329 | 1.3 |
| 2020 | 1 | 31 | 23 | -2.4 | 0   | 0   | 0   | 1010 | -2.2 | 331 | 1.3 |
| 2020 | 2 | 1  | 0  | -2.4 | 0   | 0   | 0   | 1010 | -2.4 | 331 | 1.3 |
| 2020 | 2 | 1  | 1  | -2.4 | 0   | 0   | 0   | 1011 | -2.4 | 333 | 1.3 |
| 2020 | 2 | 1  | 2  | -2.5 | 0   | 0   | 0   | 1011 | -2.5 | 334 | 1.3 |
| 2020 | 2 | 1  | 3  | -2.6 | 0   | 0   | 0   | 1011 | -2.6 | 336 | 1.3 |

|      |   |   |    |      |     |     |     |      |      |     |     |
|------|---|---|----|------|-----|-----|-----|------|------|-----|-----|
| 2020 | 2 | 1 | 4  | -2.7 | 0   | 0   | 0   | 1011 | -2.7 | 338 | 1.3 |
| 2020 | 2 | 1 | 5  | -2.6 | 0   | 0   | 0   | 1011 | -2.6 | 337 | 1.3 |
| 2020 | 2 | 1 | 6  | -2.3 | 0   | 0   | 0   | 1012 | -2.3 | 335 | 1.3 |
| 2020 | 2 | 1 | 7  | -1.8 | 0   | 0   | 0   | 1012 | -1.8 | 332 | 1.2 |
| 2020 | 2 | 1 | 8  | -0.1 | 28  | 83  | 34  | 1013 | 1.4  | 327 | 1.5 |
| 2020 | 2 | 1 | 9  | 0.6  | 84  | 0   | 84  | 1013 | 4    | 321 | 2.5 |
| 2020 | 2 | 1 | 10 | 1.1  | 131 | 0   | 131 | 1013 | 5.9  | 317 | 3.2 |
| 2020 | 2 | 1 | 11 | 1.3  | 228 | 467 | 475 | 1013 | 7    | 311 | 3.3 |
| 2020 | 2 | 1 | 12 | 1.3  | 237 | 532 | 555 | 1012 | 7.9  | 305 | 3.6 |
| 2020 | 2 | 1 | 13 | 1.2  | 261 | 487 | 559 | 1011 | 8.2  | 301 | 3.9 |
| 2020 | 2 | 1 | 14 | 1    | 265 | 409 | 499 | 1011 | 8.2  | 299 | 4.1 |
| 2020 | 2 | 1 | 15 | 1    | 237 | 303 | 383 | 1011 | 7.6  | 298 | 3.9 |
| 2020 | 2 | 1 | 16 | 1.9  | 164 | 227 | 243 | 1011 | 6.1  | 295 | 2.4 |
| 2020 | 2 | 1 | 17 | 1.2  | 68  | 113 | 89  | 1011 | 2.9  | 290 | 1.4 |
| 2020 | 2 | 1 | 18 | 1    | 0   | 0   | 0   | 1012 | 1.5  | 286 | 1.3 |
| 2020 | 2 | 1 | 19 | 1.3  | 0   | 0   | 0   | 1012 | 1.3  | 289 | 1.3 |
| 2020 | 2 | 1 | 20 | 1.3  | 0   | 0   | 0   | 1013 | 1.3  | 299 | 1.3 |
| 2020 | 2 | 1 | 21 | 1.2  | 0   | 0   | 0   | 1013 | 1.2  | 314 | 1.2 |
| 2020 | 2 | 1 | 22 | 0.7  | 0   | 0   | 0   | 1013 | 0.7  | 328 | 1.3 |
| 2020 | 2 | 1 | 23 | 0.1  | 0   | 0   | 0   | 1013 | 0.1  | 339 | 1.3 |
| 2020 | 2 | 2 | 0  | -0.8 | 0   | 0   | 0   | 1013 | -0.8 | 342 | 1.3 |
| 2020 | 2 | 2 | 1  | -1.2 | 0   | 0   | 0   | 1013 | -1.2 | 344 | 1.3 |
| 2020 | 2 | 2 | 2  | -1.1 | 0   | 0   | 0   | 1013 | -1.1 | 347 | 1.3 |
| 2020 | 2 | 2 | 3  | -0.8 | 0   | 0   | 0   | 1013 | -0.8 | 349 | 1.2 |
| 2020 | 2 | 2 | 4  | -0.7 | 0   | 0   | 0   | 1013 | -0.7 | 351 | 1.1 |
| 2020 | 2 | 2 | 5  | -0.6 | 0   | 0   | 0   | 1013 | -0.5 | 358 | 1   |
| 2020 | 2 | 2 | 6  | -0.9 | 0   | 0   | 0   | 1013 | -0.9 | 8   | 1   |
| 2020 | 2 | 2 | 7  | -1.2 | 0   | 0   | 0   | 1014 | -0.9 | 12  | 0.9 |
| 2020 | 2 | 2 | 8  | -0.8 | 29  | 38  | 32  | 1014 | 0.8  | 8   | 1   |
| 2020 | 2 | 2 | 9  | -1.2 | 116 | 330 | 204 | 1014 | 2.5  | 337 | 1.4 |
| 2020 | 2 | 2 | 10 | -1.5 | 153 | 546 | 381 | 1014 | 3.7  | 327 | 1.7 |
| 2020 | 2 | 2 | 11 | -1.5 | 207 | 401 | 421 | 1014 | 5.1  | 318 | 2   |
| 2020 | 2 | 2 | 12 | -1.8 | 278 | 217 | 409 | 1013 | 6.1  | 314 | 2.3 |
| 2020 | 2 | 2 | 13 | -1.6 | 266 | 341 | 475 | 1012 | 7    | 311 | 2.7 |
| 2020 | 2 | 2 | 14 | -1.5 | 141 | 782 | 591 | 1011 | 7.4  | 311 | 2.9 |
| 2020 | 2 | 2 | 15 | -1.7 | 124 | 739 | 484 | 1011 | 7.2  | 312 | 2.9 |
| 2020 | 2 | 2 | 16 | -0.9 | 105 | 615 | 323 | 1011 | 6.1  | 313 | 2.3 |
| 2020 | 2 | 2 | 17 | 0    | 70  | 362 | 137 | 1011 | 2.8  | 318 | 1.2 |
| 2020 | 2 | 2 | 18 | -0.6 | 0   | 0   | 0   | 1012 | 1.7  | 322 | 1.3 |
| 2020 | 2 | 2 | 19 | -0.6 | 0   | 0   | 0   | 1012 | 1.4  | 323 | 1.3 |
| 2020 | 2 | 2 | 20 | -1.1 | 0   | 0   | 0   | 1012 | 0.7  | 321 | 1.3 |
| 2020 | 2 | 2 | 21 | -1.6 | 0   | 0   | 0   | 1012 | -0.1 | 322 | 1.2 |
| 2020 | 2 | 2 | 22 | -1.8 | 0   | 0   | 0   | 1012 | -0.5 | 320 | 1.3 |
| 2020 | 2 | 2 | 23 | -1.8 | 0   | 0   | 0   | 1012 | -1.2 | 317 | 1.3 |
| 2020 | 2 | 3 | 0  | -1.7 | 0   | 0   | 0   | 1012 | -1.5 | 315 | 1.3 |
| 2020 | 2 | 3 | 1  | -1.6 | 0   | 0   | 0   | 1012 | -1.6 | 312 | 1.3 |
| 2020 | 2 | 3 | 2  | -1.6 | 0   | 0   | 0   | 1012 | -1.6 | 309 | 1.3 |
| 2020 | 2 | 3 | 3  | -1   | 0   | 0   | 0   | 1012 | -1   | 307 | 1.2 |
| 2020 | 2 | 3 | 4  | -0.5 | 0   | 0   | 0   | 1011 | -0.5 | 307 | 1.2 |
| 2020 | 2 | 3 | 5  | -0.1 | 0   | 0   | 0   | 1012 | -0.1 | 314 | 1.2 |



|      |   |   |    |      |     |     |     |      |      |     |     |
|------|---|---|----|------|-----|-----|-----|------|------|-----|-----|
| 2020 | 2 | 3 | 6  | 0.7  | 0   | 0   | 0   | 1012 | 0.7  | 326 | 1.5 |
| 2020 | 2 | 3 | 7  | 1.1  | 0   | 0   | 0   | 1013 | 1.1  | 337 | 2   |
| 2020 | 2 | 3 | 8  | 1.5  | 23  | 0   | 23  | 1013 | 2    | 346 | 3.2 |
| 2020 | 2 | 3 | 9  | 0.6  | 103 | 43  | 114 | 1014 | 2.6  | 350 | 4.2 |
| 2020 | 2 | 3 | 10 | -0.6 | 157 | 18  | 165 | 1014 | 3.4  | 345 | 4.5 |
| 2020 | 2 | 3 | 11 | -1.2 | 240 | 229 | 363 | 1014 | 4.3  | 339 | 4.7 |
| 2020 | 2 | 3 | 12 | -1.7 | 263 | 56  | 297 | 1014 | 5.3  | 333 | 4.9 |
| 2020 | 2 | 3 | 13 | -2.2 | 289 | 218 | 424 | 1013 | 6    | 329 | 5   |
| 2020 | 2 | 3 | 14 | -2.8 | 158 | 0   | 158 | 1013 | 5.9  | 328 | 4.9 |
| 2020 | 2 | 3 | 15 | -3.4 | 199 | 333 | 362 | 1013 | 5.1  | 330 | 4.8 |
| 2020 | 2 | 3 | 16 | -3.7 | 92  | 706 | 344 | 1013 | 3.7  | 335 | 4.3 |
| 2020 | 2 | 3 | 17 | -3.3 | 60  | 506 | 156 | 1014 | 0.9  | 339 | 2.7 |
| 2020 | 2 | 3 | 18 | -3.9 | 0   | 0   | 0   | 1014 | -1.4 | 344 | 2.1 |
| 2020 | 2 | 3 | 19 | -4.5 | 0   | 0   | 0   | 1015 | -2.4 | 347 | 1.9 |
| 2020 | 2 | 3 | 20 | -5.2 | 0   | 0   | 0   | 1015 | -3.4 | 348 | 1.7 |
| 2020 | 2 | 3 | 21 | -5.6 | 0   | 0   | 0   | 1015 | -4   | 352 | 1.5 |
| 2020 | 2 | 3 | 22 | -5.8 | 0   | 0   | 0   | 1015 | -4.2 | 356 | 1.5 |
| 2020 | 2 | 3 | 23 | -6.1 | 0   | 0   | 0   | 1015 | -4.4 | 359 | 1.5 |
| 2020 | 2 | 4 | 0  | -6.3 | 0   | 0   | 0   | 1015 | -4.4 | 1   | 1.6 |
| 2020 | 2 | 4 | 1  | -6.4 | 0   | 0   | 0   | 1015 | -4.5 | 4   | 1.6 |
| 2020 | 2 | 4 | 2  | -6.5 | 0   | 0   | 0   | 1015 | -4.6 | 5   | 1.4 |
| 2020 | 2 | 4 | 3  | -6.5 | 0   | 0   | 0   | 1015 | -4.6 | 3   | 1.3 |
| 2020 | 2 | 4 | 4  | -6.4 | 0   | 0   | 0   | 1015 | -4.6 | 3   | 1.2 |
| 2020 | 2 | 4 | 5  | -6.5 | 0   | 0   | 0   | 1015 | -4.8 | 6   | 1.2 |
| 2020 | 2 | 4 | 6  | -6.7 | 0   | 0   | 0   | 1015 | -5   | 11  | 1.3 |
| 2020 | 2 | 4 | 7  | -6.7 | 0   | 0   | 0   | 1015 | -4.6 | 11  | 1.4 |
| 2020 | 2 | 4 | 8  | -6.4 | 32  | 291 | 58  | 1016 | -2.3 | 5   | 2.4 |
| 2020 | 2 | 4 | 9  | -5.8 | 73  | 646 | 248 | 1016 | 0.2  | 355 | 2.8 |
| 2020 | 2 | 4 | 10 | -5.6 | 94  | 797 | 433 | 1015 | 2.2  | 350 | 3.1 |
| 2020 | 2 | 4 | 11 | -5.4 | 108 | 868 | 577 | 1015 | 3.8  | 344 | 3.1 |
| 2020 | 2 | 4 | 12 | -5.3 | 115 | 900 | 662 | 1014 | 5.1  | 334 | 3   |
| 2020 | 2 | 4 | 13 | -5.3 | 121 | 885 | 672 | 1013 | 5.9  | 323 | 2.9 |
| 2020 | 2 | 4 | 14 | -5.1 | 122 | 851 | 619 | 1012 | 6.1  | 315 | 2.9 |
| 2020 | 2 | 4 | 15 | -4.7 | 117 | 784 | 505 | 1012 | 5.7  | 309 | 2.8 |
| 2020 | 2 | 4 | 16 | -2.3 | 102 | 651 | 337 | 1012 | 4.2  | 304 | 1.8 |
| 2020 | 2 | 4 | 17 | -3.6 | 68  | 389 | 143 | 1012 | 0    | 302 | 1.3 |
| 2020 | 2 | 4 | 18 | -5.3 | 0   | 0   | 0   | 1013 | -1.8 | 304 | 1.4 |
| 2020 | 2 | 4 | 19 | -5.1 | 0   | 0   | 0   | 1013 | -2.2 | 305 | 1.4 |
| 2020 | 2 | 4 | 20 | -4.7 | 0   | 0   | 0   | 1013 | -2.3 | 303 | 1.4 |
| 2020 | 2 | 4 | 21 | -4.1 | 0   | 0   | 0   | 1013 | -2.1 | 296 | 1.3 |
| 2020 | 2 | 4 | 22 | -3.4 | 0   | 0   | 0   | 1013 | -1.8 | 288 | 1.4 |
| 2020 | 2 | 4 | 23 | -2   | 0   | 0   | 0   | 1013 | -1   | 299 | 1.7 |
| 2020 | 2 | 5 | 0  | -0.3 | 0   | 0   | 0   | 1013 | 0.7  | 325 | 3.5 |
| 2020 | 2 | 5 | 1  | -1   | 0   | 0   | 0   | 1014 | 0    | 343 | 4.8 |
| 2020 | 2 | 5 | 2  | -3.1 | 0   | 0   | 0   | 1014 | -1.7 | 349 | 3.9 |
| 2020 | 2 | 5 | 3  | -4.5 | 0   | 0   | 0   | 1014 | -2.7 | 347 | 3.4 |
| 2020 | 2 | 5 | 4  | -5.2 | 0   | 0   | 0   | 1014 | -2.8 | 346 | 4.6 |
| 2020 | 2 | 5 | 5  | -6.1 | 0   | 0   | 0   | 1015 | -3.5 | 349 | 4.9 |
| 2020 | 2 | 5 | 6  | -7.6 | 0   | 0   | 0   | 1016 | -4.7 | 352 | 4.7 |
| 2020 | 2 | 5 | 7  | -8.7 | 0   | 0   | 0   | 1016 | -5.6 | 352 | 4.5 |

|      |   |   |    |       |     |     |     |      |      |     |     |
|------|---|---|----|-------|-----|-----|-----|------|------|-----|-----|
| 2020 | 2 | 5 | 8  | -10.3 | 32  | 379 | 67  | 1017 | -4.8 | 352 | 5.7 |
| 2020 | 2 | 5 | 9  | -11.2 | 64  | 738 | 266 | 1018 | -3.7 | 350 | 6.3 |
| 2020 | 2 | 5 | 10 | -11.9 | 79  | 881 | 457 | 1018 | -2.5 | 347 | 6.4 |
| 2020 | 2 | 5 | 11 | -12.1 | 88  | 949 | 605 | 1018 | -1.4 | 344 | 6.5 |
| 2020 | 2 | 5 | 12 | -11.9 | 99  | 964 | 689 | 1017 | -0.6 | 342 | 6.5 |
| 2020 | 2 | 5 | 13 | -11.6 | 100 | 970 | 708 | 1016 | -0.2 | 341 | 6.5 |
| 2020 | 2 | 5 | 14 | -11.6 | 99  | 949 | 657 | 1016 | -0.1 | 340 | 6.5 |
| 2020 | 2 | 5 | 15 | -11.5 | 92  | 899 | 541 | 1016 | -0.7 | 339 | 6.2 |
| 2020 | 2 | 5 | 16 | -11.3 | 80  | 799 | 372 | 1016 | -1.9 | 339 | 5.8 |
| 2020 | 2 | 5 | 17 | -10.5 | 57  | 582 | 171 | 1017 | -3.7 | 338 | 4.3 |
| 2020 | 2 | 5 | 18 | -9.6  | 0   | 0   | 0   | 1018 | -5   | 339 | 3.3 |
| 2020 | 2 | 5 | 19 | -9.3  | 0   | 0   | 0   | 1019 | -5.4 | 343 | 3.1 |
| 2020 | 2 | 5 | 20 | -9.1  | 0   | 0   | 0   | 1019 | -5.6 | 347 | 3   |
| 2020 | 2 | 5 | 21 | -9.1  | 0   | 0   | 0   | 1019 | -5.8 | 350 | 2.8 |
| 2020 | 2 | 5 | 22 | -9.2  | 0   | 0   | 0   | 1019 | -5.9 | 352 | 2.7 |
| 2020 | 2 | 5 | 23 | -9.3  | 0   | 0   | 0   | 1019 | -5.9 | 352 | 2.8 |
| 2020 | 2 | 6 | 0  | -9.3  | 0   | 0   | 0   | 1019 | -5.8 | 353 | 2.8 |
| 2020 | 2 | 6 | 1  | -9.3  | 0   | 0   | 0   | 1020 | -5.9 | 356 | 3   |
| 2020 | 2 | 6 | 2  | -9.8  | 0   | 0   | 0   | 1020 | -5.9 | 0   | 3.2 |
| 2020 | 2 | 6 | 3  | -10.7 | 0   | 0   | 0   | 1020 | -6.2 | 4   | 3.7 |
| 2020 | 2 | 6 | 4  | -11.1 | 0   | 0   | 0   | 1020 | -6.6 | 6   | 3.8 |
| 2020 | 2 | 6 | 5  | -11.7 | 0   | 0   | 0   | 1020 | -6.9 | 11  | 3.8 |
| 2020 | 2 | 6 | 6  | -12.4 | 0   | 0   | 0   | 1021 | -7.2 | 14  | 3.7 |
| 2020 | 2 | 6 | 7  | -13.1 | 0   | 0   | 0   | 1021 | -7.5 | 14  | 3.6 |
| 2020 | 2 | 6 | 8  | -13.6 | 39  | 210 | 59  | 1021 | -6.7 | 12  | 3.9 |
| 2020 | 2 | 6 | 9  | -13.7 | 97  | 527 | 243 | 1021 | -5.2 | 8   | 3.9 |
| 2020 | 2 | 6 | 10 | -13.6 | 129 | 685 | 425 | 1021 | -3.6 | 4   | 3.6 |
| 2020 | 2 | 6 | 11 | -13.6 | 208 | 424 | 441 | 1020 | -1.8 | 3   | 3.5 |
| 2020 | 2 | 6 | 12 | -13.3 | 249 | 405 | 499 | 1020 | -0.9 | 354 | 3.3 |
| 2020 | 2 | 6 | 13 | -12.6 | 289 | 266 | 457 | 1019 | -0.3 | 350 | 3.1 |
| 2020 | 2 | 6 | 14 | -12.3 | 237 | 405 | 477 | 1018 | 0.2  | 352 | 2.9 |
| 2020 | 2 | 6 | 15 | -11.6 | 225 | 118 | 284 | 1018 | 0.2  | 353 | 2.6 |
| 2020 | 2 | 6 | 16 | -9.4  | 150 | 216 | 230 | 1018 | -0.3 | 354 | 2.1 |
| 2020 | 2 | 6 | 17 | -6.3  | 70  | 4   | 71  | 1018 | -1.2 | 351 | 1.4 |
| 2020 | 2 | 6 | 18 | -6    | 0   | 0   | 0   | 1018 | -1.7 | 355 | 1.4 |
| 2020 | 2 | 6 | 19 | -6.2  | 0   | 0   | 0   | 1018 | -1.9 | 358 | 1.6 |
| 2020 | 2 | 6 | 20 | -6.2  | 0   | 0   | 0   | 1018 | -2.3 | 7   | 1.5 |
| 2020 | 2 | 6 | 21 | -6.1  | 0   | 0   | 0   | 1018 | -2.7 | 14  | 1.3 |
| 2020 | 2 | 6 | 22 | -6.1  | 0   | 0   | 0   | 1018 | -3   | 16  | 1.2 |
| 2020 | 2 | 6 | 23 | -6.2  | 0   | 0   | 0   | 1018 | -3.3 | 24  | 1.1 |
| 2020 | 2 | 7 | 0  | -6.5  | 0   | 0   | 0   | 1017 | -3.6 | 26  | 0.9 |
| 2020 | 2 | 7 | 1  | -6.8  | 0   | 0   | 0   | 1017 | -3.6 | 20  | 0.8 |
| 2020 | 2 | 7 | 2  | -7.7  | 0   | 0   | 0   | 1017 | -3.7 | 3   | 0.8 |
| 2020 | 2 | 7 | 3  | -7.8  | 0   | 0   | 0   | 1018 | -4.1 | 343 | 0.9 |
| 2020 | 2 | 7 | 4  | -7.7  | 0   | 0   | 0   | 1018 | -4.7 | 340 | 1   |
| 2020 | 2 | 7 | 5  | -8.2  | 0   | 0   | 0   | 1018 | -5   | 344 | 1.5 |
| 2020 | 2 | 7 | 6  | -8.9  | 0   | 0   | 0   | 1018 | -5.3 | 349 | 1.8 |
| 2020 | 2 | 7 | 7  | -9.5  | 0   | 0   | 0   | 1018 | -5.5 | 356 | 2.2 |
| 2020 | 2 | 7 | 8  | -10.3 | 34  | 33  | 37  | 1018 | -4.2 | 360 | 3.1 |
| 2020 | 2 | 7 | 9  | -9.9  | 144 | 243 | 213 | 1017 | -2.2 | 357 | 3.3 |

|      |   |   |    |      |     |     |     |      |      |     |     |
|------|---|---|----|------|-----|-----|-----|------|------|-----|-----|
| 2020 | 2 | 7 | 10 | -9.1 | 215 | 393 | 386 | 1017 | 0.2  | 353 | 3.7 |
| 2020 | 2 | 7 | 11 | -7.8 | 252 | 491 | 524 | 1016 | 2.2  | 347 | 4   |
| 2020 | 2 | 7 | 12 | -6   | 252 | 405 | 503 | 1015 | 3.8  | 342 | 4.1 |
| 2020 | 2 | 7 | 13 | -4.6 | 213 | 540 | 556 | 1015 | 4.5  | 339 | 4.2 |
| 2020 | 2 | 7 | 14 | -3.7 | 200 | 531 | 516 | 1014 | 4.5  | 337 | 4.1 |
| 2020 | 2 | 7 | 15 | -3.1 | 228 | 485 | 474 | 1014 | 3.9  | 334 | 3.9 |
| 2020 | 2 | 7 | 16 | -2.3 | 177 | 372 | 316 | 1014 | 2.7  | 336 | 3   |
| 2020 | 2 | 7 | 17 | -1.9 | 75  | 33  | 81  | 1014 | 0.4  | 336 | 1.6 |
| 2020 | 2 | 7 | 18 | -2.4 | 0   | 0   | 0   | 1015 | -0.6 | 337 | 1.4 |
| 2020 | 2 | 7 | 19 | -2.5 | 0   | 0   | 0   | 1015 | -0.8 | 339 | 1.4 |
| 2020 | 2 | 7 | 20 | -2.8 | 0   | 0   | 0   | 1015 | -1.4 | 338 | 1.3 |
| 2020 | 2 | 7 | 21 | -2.8 | 0   | 0   | 0   | 1015 | -1.8 | 336 | 1.3 |
| 2020 | 2 | 7 | 22 | -2.5 | 0   | 0   | 0   | 1014 | -1.8 | 336 | 1.3 |
| 2020 | 2 | 7 | 23 | -2.2 | 0   | 0   | 0   | 1014 | -1.8 | 335 | 1.4 |
| 2020 | 2 | 8 | 0  | -1.9 | 0   | 0   | 0   | 1014 | -1.3 | 334 | 1.6 |
| 2020 | 2 | 8 | 1  | -1.7 | 0   | 0   | 0   | 1014 | -0.9 | 336 | 1.8 |
| 2020 | 2 | 8 | 2  | -1.4 | 0   | 0   | 0   | 1014 | -0.8 | 337 | 2   |
| 2020 | 2 | 8 | 3  | -1.1 | 0   | 0   | 0   | 1014 | -0.9 | 337 | 1.9 |
| 2020 | 2 | 8 | 4  | -0.9 | 0   | 0   | 0   | 1013 | -0.9 | 334 | 1.8 |
| 2020 | 2 | 8 | 5  | -0.5 | 0   | 0   | 0   | 1013 | -0.5 | 331 | 1.9 |
| 2020 | 2 | 8 | 6  | -0.3 | 0   | 0   | 0   | 1014 | -0.3 | 329 | 1.8 |
| 2020 | 2 | 8 | 7  | 0.1  | 0   | 0   | 0   | 1014 | 0.1  | 329 | 2.1 |
| 2020 | 2 | 8 | 8  | 1.2  | 13  | 0   | 13  | 1014 | 1.8  | 330 | 3.1 |
| 2020 | 2 | 8 | 9  | 1.2  | 51  | 0   | 51  | 1014 | 3.1  | 330 | 4.3 |
| 2020 | 2 | 8 | 10 | 0    | 35  | 0   | 35  | 1014 | 4.2  | 328 | 5.3 |
| 2020 | 2 | 8 | 11 | -1.4 | 141 | 0   | 141 | 1014 | 4.5  | 327 | 5.7 |
| 2020 | 2 | 8 | 12 | -2.3 | 200 | 7   | 204 | 1014 | 4.9  | 328 | 5.9 |
| 2020 | 2 | 8 | 13 | -2.6 | 280 | 56  | 316 | 1013 | 5.3  | 327 | 6   |
| 2020 | 2 | 8 | 14 | -3.1 | 145 | 804 | 628 | 1013 | 5.1  | 328 | 6.1 |
| 2020 | 2 | 8 | 15 | -3.7 | 133 | 752 | 517 | 1013 | 4.2  | 330 | 6   |
| 2020 | 2 | 8 | 16 | -4.2 | 105 | 685 | 363 | 1013 | 2.8  | 332 | 5.4 |
| 2020 | 2 | 8 | 17 | -4.2 | 68  | 495 | 170 | 1014 | 0.2  | 333 | 3.7 |
| 2020 | 2 | 8 | 18 | -4.5 | 9   | 52  | 10  | 1015 | -1.9 | 336 | 2.6 |
| 2020 | 2 | 8 | 19 | -4.8 | 0   | 0   | 0   | 1015 | -2.3 | 339 | 2.4 |
| 2020 | 2 | 8 | 20 | -4.9 | 0   | 0   | 0   | 1015 | -2.6 | 341 | 2.2 |
| 2020 | 2 | 8 | 21 | -4.9 | 0   | 0   | 0   | 1016 | -2.7 | 341 | 1.9 |
| 2020 | 2 | 8 | 22 | -4.9 | 0   | 0   | 0   | 1016 | -2.6 | 345 | 1.8 |
| 2020 | 2 | 8 | 23 | -4.9 | 0   | 0   | 0   | 1015 | -2.5 | 351 | 1.8 |
| 2020 | 2 | 9 | 0  | -4.8 | 0   | 0   | 0   | 1015 | -2.5 | 352 | 1.8 |
| 2020 | 2 | 9 | 1  | -4.7 | 0   | 0   | 0   | 1015 | -2.5 | 351 | 1.8 |
| 2020 | 2 | 9 | 2  | -4.6 | 0   | 0   | 0   | 1015 | -2.6 | 352 | 1.8 |
| 2020 | 2 | 9 | 3  | -4.6 | 0   | 0   | 0   | 1015 | -2.7 | 356 | 1.7 |
| 2020 | 2 | 9 | 4  | -4.7 | 0   | 0   | 0   | 1015 | -2.9 | 2   | 1.7 |
| 2020 | 2 | 9 | 5  | -5.2 | 0   | 0   | 0   | 1015 | -3.4 | 8   | 1.5 |
| 2020 | 2 | 9 | 6  | -5.8 | 0   | 0   | 0   | 1015 | -4.1 | 14  | 1.4 |
| 2020 | 2 | 9 | 7  | -6.2 | 0   | 0   | 0   | 1015 | -4.3 | 19  | 1.3 |
| 2020 | 2 | 9 | 8  | -6.3 | 41  | 245 | 66  | 1015 | -2.2 | 21  | 2.1 |
| 2020 | 2 | 9 | 9  | -5.3 | 92  | 563 | 254 | 1015 | 0.5  | 353 | 2.4 |
| 2020 | 2 | 9 | 10 | -4.2 | 120 | 707 | 434 | 1015 | 2.5  | 330 | 3   |
| 2020 | 2 | 9 | 11 | -3.7 | 135 | 790 | 578 | 1014 | 3.8  | 320 | 3.2 |

|      |   |    |    |      |     |     |     |      |      |     |     |
|------|---|----|----|------|-----|-----|-----|------|------|-----|-----|
| 2020 | 2 | 9  | 12 | -3.3 | 133 | 850 | 667 | 1013 | 4.8  | 311 | 3.4 |
| 2020 | 2 | 9  | 13 | -2.8 | 129 | 869 | 689 | 1012 | 5.6  | 304 | 3.6 |
| 2020 | 2 | 9  | 14 | -2.4 | 123 | 856 | 641 | 1011 | 5.8  | 300 | 3.9 |
| 2020 | 2 | 9  | 15 | -2.2 | 119 | 786 | 524 | 1011 | 5.4  | 301 | 4.2 |
| 2020 | 2 | 9  | 16 | -1.8 | 98  | 694 | 362 | 1011 | 4.2  | 303 | 3.5 |
| 2020 | 2 | 9  | 17 | -1.8 | 65  | 506 | 172 | 1011 | 0.8  | 305 | 1.9 |
| 2020 | 2 | 9  | 18 | -2.7 | 11  | 70  | 12  | 1011 | -1.3 | 308 | 1.6 |
| 2020 | 2 | 9  | 19 | -2.7 | 0   | 0   | 0   | 1011 | -1.6 | 309 | 1.5 |
| 2020 | 2 | 9  | 20 | -2.8 | 0   | 0   | 0   | 1011 | -1.5 | 305 | 1.3 |
| 2020 | 2 | 9  | 21 | -2.8 | 0   | 0   | 0   | 1011 | -1.4 | 295 | 1.2 |
| 2020 | 2 | 9  | 22 | -2.6 | 0   | 0   | 0   | 1011 | -1.4 | 286 | 1.2 |
| 2020 | 2 | 9  | 23 | -2.4 | 0   | 0   | 0   | 1010 | -1.5 | 281 | 1.2 |
| 2020 | 2 | 10 | 0  | -2.2 | 0   | 0   | 0   | 1010 | -1.5 | 282 | 1.3 |
| 2020 | 2 | 10 | 1  | -1.8 | 0   | 0   | 0   | 1010 | -1.4 | 285 | 1.3 |
| 2020 | 2 | 10 | 2  | -1.3 | 0   | 0   | 0   | 1010 | -1.1 | 286 | 1.3 |
| 2020 | 2 | 10 | 3  | -0.9 | 0   | 0   | 0   | 1010 | -0.9 | 285 | 1.3 |
| 2020 | 2 | 10 | 4  | -0.6 | 0   | 0   | 0   | 1009 | -0.6 | 284 | 1.3 |
| 2020 | 2 | 10 | 5  | 0.7  | 0   | 0   | 0   | 1009 | 0.7  | 285 | 1.4 |
| 2020 | 2 | 10 | 6  | 1.6  | 0   | 0   | 0   | 1010 | 1.6  | 287 | 1.4 |
| 2020 | 2 | 10 | 7  | 2    | 0   | 0   | 0   | 1010 | 2    | 290 | 1.3 |
| 2020 | 2 | 10 | 8  | 2.9  | 25  | 15  | 26  | 1011 | 2.9  | 292 | 1.1 |
| 2020 | 2 | 10 | 9  | 3.9  | 146 | 116 | 180 | 1011 | 4.5  | 295 | 1.1 |
| 2020 | 2 | 10 | 10 | 4.3  | 250 | 247 | 361 | 1011 | 6.1  | 298 | 2   |
| 2020 | 2 | 10 | 11 | 3.9  | 286 | 386 | 504 | 1011 | 7.4  | 298 | 2.5 |
| 2020 | 2 | 10 | 12 | 3.2  | 264 | 526 | 597 | 1011 | 8.8  | 299 | 2.7 |
| 2020 | 2 | 10 | 13 | 2.2  | 233 | 612 | 630 | 1010 | 10   | 301 | 2.9 |
| 2020 | 2 | 10 | 14 | 1.4  | 206 | 637 | 594 | 1010 | 10.4 | 305 | 2.8 |
| 2020 | 2 | 10 | 15 | 1.7  | 196 | 532 | 473 | 1010 | 9.7  | 311 | 2.1 |
| 2020 | 2 | 10 | 16 | 3    | 143 | 475 | 326 | 1010 | 7    | 321 | 1.1 |
| 2020 | 2 | 10 | 17 | -1.2 | 82  | 324 | 151 | 1011 | 4    | 334 | 1.4 |
| 2020 | 2 | 10 | 18 | -2.9 | 7   | 28  | 8   | 1012 | 2.9  | 348 | 1.5 |
| 2020 | 2 | 10 | 19 | -3.5 | 0   | 0   | 0   | 1012 | 2.5  | 5   | 1.4 |
| 2020 | 2 | 10 | 20 | -4.1 | 0   | 0   | 0   | 1012 | 2.4  | 21  | 1.3 |
| 2020 | 2 | 10 | 21 | -4.7 | 0   | 0   | 0   | 1013 | 2.4  | 37  | 1.2 |
| 2020 | 2 | 10 | 22 | -5.2 | 0   | 0   | 0   | 1013 | 2.7  | 51  | 1   |
| 2020 | 2 | 10 | 23 | -5.6 | 0   | 0   | 0   | 1013 | 2.6  | 62  | 1   |
| 2020 | 2 | 11 | 0  | -5.7 | 0   | 0   | 0   | 1014 | 2.2  | 66  | 1.1 |
| 2020 | 2 | 11 | 1  | -5.2 | 0   | 0   | 0   | 1014 | 1.6  | 70  | 1.3 |
| 2020 | 2 | 11 | 2  | -5.4 | 0   | 0   | 0   | 1014 | 1.1  | 82  | 1.3 |
| 2020 | 2 | 11 | 3  | -5.4 | 0   | 0   | 0   | 1014 | 0.9  | 98  | 1.3 |
| 2020 | 2 | 11 | 4  | -5.3 | 0   | 0   | 0   | 1014 | 0.4  | 108 | 1.4 |
| 2020 | 2 | 11 | 5  | -4.8 | 0   | 0   | 0   | 1014 | -0.3 | 111 | 1.4 |
| 2020 | 2 | 11 | 6  | -4   | 0   | 0   | 0   | 1014 | -0.5 | 114 | 1.4 |
| 2020 | 2 | 11 | 7  | -2.6 | 0   | 0   | 0   | 1015 | 0.1  | 114 | 1.4 |
| 2020 | 2 | 11 | 8  | -0.5 | 40  | 289 | 72  | 1015 | 3.2  | 112 | 2.2 |
| 2020 | 2 | 11 | 9  | -0.1 | 85  | 605 | 263 | 1015 | 5.6  | 114 | 3.2 |
| 2020 | 2 | 11 | 10 | 0.3  | 173 | 359 | 335 | 1015 | 8    | 129 | 3.2 |
| 2020 | 2 | 11 | 11 | 0.7  | 142 | 666 | 520 | 1015 | 9.2  | 139 | 3.2 |
| 2020 | 2 | 11 | 12 | 1.1  | 187 | 615 | 578 | 1015 | 9.7  | 143 | 3   |
| 2020 | 2 | 11 | 13 | 1.6  | 206 | 581 | 585 | 1014 | 10   | 142 | 2.8 |

|      |   |    |    |      |     |     |     |      |      |     |     |
|------|---|----|----|------|-----|-----|-----|------|------|-----|-----|
| 2020 | 2 | 11 | 14 | 2.3  | 262 | 348 | 476 | 1014 | 9.9  | 137 | 2.5 |
| 2020 | 2 | 11 | 15 | 3.9  | 187 | 460 | 428 | 1013 | 9.4  | 130 | 1.7 |
| 2020 | 2 | 11 | 16 | 4.1  | 155 | 43  | 171 | 1013 | 7.2  | 121 | 1   |
| 2020 | 2 | 11 | 17 | 1.3  | 34  | 0   | 34  | 1013 | 4.7  | 109 | 1.3 |
| 2020 | 2 | 11 | 18 | 0.4  | 4   | 0   | 4   | 1013 | 2.9  | 107 | 1.5 |
| 2020 | 2 | 11 | 19 | 0.1  | 0   | 0   | 0   | 1013 | 2.4  | 109 | 1.5 |
| 2020 | 2 | 11 | 20 | 0.7  | 0   | 0   | 0   | 1013 | 2.9  | 111 | 1.6 |
| 2020 | 2 | 11 | 21 | 1.3  | 0   | 0   | 0   | 1013 | 3.2  | 116 | 1.7 |
| 2020 | 2 | 11 | 22 | 1.9  | 0   | 0   | 0   | 1012 | 3.3  | 121 | 1.7 |
| 2020 | 2 | 11 | 23 | 3    | 0   | 0   | 0   | 1011 | 3.7  | 124 | 1.9 |
| 2020 | 2 | 12 | 0  | 4.2  | 0   | 0   | 0   | 1010 | 4.2  | 131 | 2   |
| 2020 | 2 | 12 | 1  | 4.5  | 0   | 0   | 0   | 1010 | 4.5  | 142 | 2.1 |
| 2020 | 2 | 12 | 2  | 4.9  | 0   | 0   | 0   | 1009 | 4.9  | 152 | 2.1 |
| 2020 | 2 | 12 | 3  | 5.2  | 0   | 0   | 0   | 1009 | 5.2  | 154 | 2.1 |
| 2020 | 2 | 12 | 4  | 5.5  | 0   | 0   | 0   | 1008 | 5.5  | 149 | 2   |
| 2020 | 2 | 12 | 5  | 5.8  | 0   | 0   | 0   | 1007 | 5.8  | 139 | 2.2 |
| 2020 | 2 | 12 | 6  | 6.6  | 0   | 0   | 0   | 1007 | 6.6  | 125 | 2.8 |
| 2020 | 2 | 12 | 7  | 7.7  | 0   | 0   | 0   | 1006 | 7.8  | 115 | 4.1 |
| 2020 | 2 | 12 | 8  | 8.2  | 30  | 0   | 30  | 1005 | 8.5  | 113 | 4.6 |
| 2020 | 2 | 12 | 9  | 8.7  | 40  | 0   | 40  | 1004 | 9.1  | 113 | 4.5 |
| 2020 | 2 | 12 | 10 | 9.4  | 19  | 0   | 19  | 1003 | 9.9  | 117 | 4.2 |
| 2020 | 2 | 12 | 11 | 10.5 | 48  | 0   | 48  | 1002 | 11.2 | 130 | 4   |
| 2020 | 2 | 12 | 12 | 12.3 | 35  | 0   | 35  | 1001 | 13.4 | 170 | 3.6 |
| 2020 | 2 | 12 | 13 | 13   | 58  | 0   | 58  | 1001 | 14.7 | 217 | 3.8 |
| 2020 | 2 | 12 | 14 | 12.5 | 49  | 0   | 49  | 1000 | 15.1 | 241 | 5   |
| 2020 | 2 | 12 | 15 | 11.2 | 43  | 0   | 43  | 1000 | 14.2 | 249 | 5.4 |
| 2020 | 2 | 12 | 16 | 10   | 28  | 0   | 28  | 1001 | 12.3 | 253 | 4.9 |
| 2020 | 2 | 12 | 17 | 9.3  | 15  | 0   | 15  | 1001 | 10.2 | 255 | 3.5 |
| 2020 | 2 | 12 | 18 | 8.8  | 2   | 0   | 2   | 1002 | 9.1  | 252 | 2.6 |
| 2020 | 2 | 12 | 19 | 8.4  | 0   | 0   | 0   | 1002 | 8.6  | 249 | 2.4 |
| 2020 | 2 | 12 | 20 | 8    | 0   | 0   | 0   | 1003 | 8.2  | 250 | 2.5 |
| 2020 | 2 | 12 | 21 | 7.5  | 0   | 0   | 0   | 1003 | 7.5  | 251 | 2.1 |
| 2020 | 2 | 12 | 22 | 7.3  | 0   | 0   | 0   | 1003 | 7.5  | 254 | 2.4 |
| 2020 | 2 | 12 | 23 | 7.2  | 0   | 0   | 0   | 1003 | 7.4  | 258 | 2.5 |
| 2020 | 2 | 13 | 0  | 7.2  | 0   | 0   | 0   | 1004 | 7.4  | 264 | 2.7 |
| 2020 | 2 | 13 | 1  | 7.2  | 0   | 0   | 0   | 1004 | 7.3  | 274 | 2.7 |
| 2020 | 2 | 13 | 2  | 7    | 0   | 0   | 0   | 1004 | 7    | 286 | 2.4 |
| 2020 | 2 | 13 | 3  | 6.4  | 0   | 0   | 0   | 1004 | 6.4  | 297 | 2   |
| 2020 | 2 | 13 | 4  | 5.8  | 0   | 0   | 0   | 1005 | 5.8  | 308 | 1.7 |
| 2020 | 2 | 13 | 5  | 5.4  | 0   | 0   | 0   | 1005 | 5.4  | 315 | 1.3 |
| 2020 | 2 | 13 | 6  | 5.3  | 0   | 0   | 0   | 1006 | 5.3  | 323 | 1.1 |
| 2020 | 2 | 13 | 7  | 5.6  | 0   | 0   | 0   | 1006 | 5.6  | 331 | 0.9 |
| 2020 | 2 | 13 | 8  | 6.3  | 49  | 196 | 72  | 1007 | 6.9  | 331 | 1.4 |
| 2020 | 2 | 13 | 9  | 6.3  | 65  | 0   | 65  | 1007 | 7.6  | 313 | 1.6 |
| 2020 | 2 | 13 | 10 | 6.5  | 113 | 0   | 113 | 1008 | 8.3  | 297 | 1.6 |
| 2020 | 2 | 13 | 11 | 6.9  | 110 | 0   | 110 | 1007 | 9.6  | 287 | 1.7 |
| 2020 | 2 | 13 | 12 | 7.1  | 174 | 1   | 174 | 1007 | 11.6 | 282 | 2.1 |
| 2020 | 2 | 13 | 13 | 7.1  | 201 | 6   | 205 | 1006 | 12.6 | 283 | 2.3 |
| 2020 | 2 | 13 | 14 | 6.9  | 194 | 6   | 198 | 1005 | 12.9 | 287 | 2.2 |
| 2020 | 2 | 13 | 15 | 6.6  | 156 | 0   | 156 | 1005 | 12.6 | 291 | 2.2 |

|      |   |    |    |      |     |     |     |      |      |     |     |
|------|---|----|----|------|-----|-----|-----|------|------|-----|-----|
| 2020 | 2 | 13 | 16 | 6.5  | 147 | 18  | 154 | 1006 | 11.6 | 293 | 2.1 |
| 2020 | 2 | 13 | 17 | 6.7  | 59  | 0   | 59  | 1006 | 8.7  | 308 | 1   |
| 2020 | 2 | 13 | 18 | 5.1  | 13  | 54  | 15  | 1006 | 6.1  | 330 | 1.1 |
| 2020 | 2 | 13 | 19 | 4.7  | 0   | 0   | 0   | 1007 | 5.1  | 351 | 1.1 |
| 2020 | 2 | 13 | 20 | 4.2  | 0   | 0   | 0   | 1007 | 4.2  | 9   | 1.1 |
| 2020 | 2 | 13 | 21 | 3.5  | 0   | 0   | 0   | 1007 | 3.5  | 28  | 1.2 |
| 2020 | 2 | 13 | 22 | 3.3  | 0   | 0   | 0   | 1007 | 3.3  | 45  | 1.2 |
| 2020 | 2 | 13 | 23 | 3.5  | 0   | 0   | 0   | 1006 | 3.5  | 54  | 1.1 |
| 2020 | 2 | 14 | 0  | 3.8  | 0   | 0   | 0   | 1006 | 3.8  | 55  | 1.1 |
| 2020 | 2 | 14 | 1  | 3.7  | 0   | 0   | 0   | 1006 | 4    | 56  | 1.1 |
| 2020 | 2 | 14 | 2  | 3.5  | 0   | 0   | 0   | 1006 | 4.1  | 52  | 1.1 |
| 2020 | 2 | 14 | 3  | 3.3  | 0   | 0   | 0   | 1006 | 4.4  | 41  | 1   |
| 2020 | 2 | 14 | 4  | 3    | 0   | 0   | 0   | 1006 | 4.8  | 23  | 0.9 |
| 2020 | 2 | 14 | 5  | 2.8  | 0   | 0   | 0   | 1006 | 4.8  | 21  | 0.8 |
| 2020 | 2 | 14 | 6  | 2.6  | 0   | 0   | 0   | 1007 | 4.4  | 43  | 1   |
| 2020 | 2 | 14 | 7  | 2.4  | 0   | 0   | 0   | 1007 | 3.9  | 50  | 1.1 |
| 2020 | 2 | 14 | 8  | 3.7  | 42  | 310 | 79  | 1007 | 6.5  | 29  | 1.4 |
| 2020 | 2 | 14 | 9  | 3.4  | 84  | 619 | 274 | 1007 | 9.1  | 16  | 1.9 |
| 2020 | 2 | 14 | 10 | 2.6  | 106 | 763 | 460 | 1007 | 11.6 | 15  | 2.3 |
| 2020 | 2 | 14 | 11 | 2    | 119 | 842 | 608 | 1006 | 13.5 | 16  | 2   |
| 2020 | 2 | 14 | 12 | 2.2  | 124 | 883 | 697 | 1006 | 15   | 5   | 1.4 |
| 2020 | 2 | 14 | 13 | 2.1  | 127 | 886 | 716 | 1006 | 16.3 | 336 | 0.9 |
| 2020 | 2 | 14 | 14 | 2.1  | 124 | 857 | 661 | 1006 | 17   | 308 | 0.7 |
| 2020 | 2 | 14 | 15 | 2.7  | 117 | 803 | 547 | 1006 | 16.9 | 310 | 0.6 |
| 2020 | 2 | 14 | 16 | 3.8  | 99  | 706 | 382 | 1006 | 16.3 | 312 | 0.3 |
| 2020 | 2 | 14 | 17 | 3.3  | 70  | 513 | 187 | 1006 | 14.2 | 225 | 0.2 |
| 2020 | 2 | 14 | 18 | 1.1  | 14  | 84  | 17  | 1007 | 12.2 | 173 | 0.8 |
| 2020 | 2 | 14 | 19 | 1.8  | 0   | 0   | 0   | 1007 | 10   | 153 | 1.2 |
| 2020 | 2 | 14 | 20 | 2    | 0   | 0   | 0   | 1007 | 8    | 149 | 1.4 |
| 2020 | 2 | 14 | 21 | 1.9  | 0   | 0   | 0   | 1007 | 7.1  | 124 | 1.3 |
| 2020 | 2 | 14 | 22 | 1.8  | 0   | 0   | 0   | 1007 | 5.9  | 100 | 1.4 |
| 2020 | 2 | 14 | 23 | 1.9  | 0   | 0   | 0   | 1007 | 5.2  | 105 | 1.4 |
| 2020 | 2 | 15 | 0  | 2.7  | 0   | 0   | 0   | 1008 | 5.5  | 116 | 1.4 |
| 2020 | 2 | 15 | 1  | 2.8  | 0   | 0   | 0   | 1008 | 5.5  | 115 | 1.7 |
| 2020 | 2 | 15 | 2  | 3.3  | 0   | 0   | 0   | 1008 | 5.9  | 106 | 2.3 |
| 2020 | 2 | 15 | 3  | 4.7  | 0   | 0   | 0   | 1007 | 6.6  | 103 | 3.2 |
| 2020 | 2 | 15 | 4  | 6.1  | 0   | 0   | 0   | 1007 | 7    | 109 | 4.3 |
| 2020 | 2 | 15 | 5  | 6.6  | 0   | 0   | 0   | 1007 | 6.9  | 111 | 4.8 |
| 2020 | 2 | 15 | 6  | 6.5  | 0   | 0   | 0   | 1007 | 6.7  | 111 | 4.2 |
| 2020 | 2 | 15 | 7  | 6.5  | 0   | 0   | 0   | 1008 | 6.8  | 109 | 3.9 |
| 2020 | 2 | 15 | 8  | 7.3  | 32  | 0   | 32  | 1008 | 8.4  | 109 | 4.7 |
| 2020 | 2 | 15 | 9  | 8.1  | 113 | 13  | 117 | 1008 | 10.9 | 110 | 4.8 |
| 2020 | 2 | 15 | 10 | 8    | 112 | 701 | 441 | 1007 | 13.2 | 114 | 5.3 |
| 2020 | 2 | 15 | 11 | 7.6  | 125 | 775 | 579 | 1006 | 14.8 | 121 | 5.7 |
| 2020 | 2 | 15 | 12 | 7.9  | 148 | 774 | 654 | 1005 | 16   | 130 | 4.7 |
| 2020 | 2 | 15 | 13 | 8.2  | 228 | 13  | 236 | 1005 | 15.8 | 138 | 3.3 |
| 2020 | 2 | 15 | 14 | 9.1  | 55  | 0   | 55  | 1004 | 15.2 | 132 | 2.1 |
| 2020 | 2 | 15 | 15 | 9.3  | 53  | 0   | 53  | 1003 | 15.4 | 119 | 2.3 |
| 2020 | 2 | 15 | 16 | 10.6 | 29  | 0   | 29  | 1003 | 14.6 | 120 | 1.8 |
| 2020 | 2 | 15 | 17 | 10.9 | 13  | 0   | 13  | 1003 | 12.7 | 137 | 1   |

|      |   |    |    |      |     |    |     |      |      |     |     |
|------|---|----|----|------|-----|----|-----|------|------|-----|-----|
| 2020 | 2 | 15 | 18 | 10.5 | 7   | 0  | 7   | 1003 | 12.1 | 138 | 0.8 |
| 2020 | 2 | 15 | 19 | 10.2 | 0   | 0  | 0   | 1003 | 12   | 127 | 0.5 |
| 2020 | 2 | 15 | 20 | 10   | 0   | 0  | 0   | 1002 | 11.5 | 122 | 0.6 |
| 2020 | 2 | 15 | 21 | 9.9  | 0   | 0  | 0   | 1001 | 11.2 | 137 | 0.4 |
| 2020 | 2 | 15 | 22 | 9.7  | 0   | 0  | 0   | 1000 | 10.7 | 272 | 0.3 |
| 2020 | 2 | 15 | 23 | 9    | 0   | 0  | 0   | 1000 | 9.4  | 304 | 2.3 |
| 2020 | 2 | 16 | 0  | 6.3  | 0   | 0  | 0   | 1000 | 7.1  | 314 | 5   |
| 2020 | 2 | 16 | 1  | 3.3  | 0   | 0  | 0   | 1001 | 4.4  | 317 | 6.7 |
| 2020 | 2 | 16 | 2  | 1.7  | 0   | 0  | 0   | 1001 | 2.6  | 319 | 7   |
| 2020 | 2 | 16 | 3  | 1    | 0   | 0  | 0   | 1000 | 2.2  | 321 | 6.9 |
| 2020 | 2 | 16 | 4  | 0.7  | 0   | 0  | 0   | 1000 | 2    | 321 | 6.7 |
| 2020 | 2 | 16 | 5  | 0.6  | 0   | 0  | 0   | 1000 | 1.9  | 317 | 5.9 |
| 2020 | 2 | 16 | 6  | 0.5  | 0   | 0  | 0   | 1001 | 1.9  | 313 | 5.5 |
| 2020 | 2 | 16 | 7  | 0.1  | 0   | 0  | 0   | 1001 | 1.8  | 310 | 5.4 |
| 2020 | 2 | 16 | 8  | -0.7 | 6   | 0  | 6   | 1001 | 2    | 309 | 6.1 |
| 2020 | 2 | 16 | 9  | -1.9 | 20  | 0  | 20  | 1002 | 2.1  | 307 | 6.9 |
| 2020 | 2 | 16 | 10 | -2.7 | 38  | 0  | 38  | 1002 | 2.1  | 303 | 7.3 |
| 2020 | 2 | 16 | 11 | -3.2 | 88  | 0  | 88  | 1003 | 2.2  | 298 | 7.7 |
| 2020 | 2 | 16 | 12 | -3.5 | 179 | 3  | 181 | 1002 | 2.9  | 295 | 8.3 |
| 2020 | 2 | 16 | 13 | -4.1 | 264 | 27 | 282 | 1002 | 2.6  | 295 | 8.4 |
| 2020 | 2 | 16 | 14 | -4.5 | 197 | 6  | 201 | 1001 | 2.3  | 297 | 8.4 |
| 2020 | 2 | 16 | 15 | -4.7 | 66  | 0  | 66  | 1002 | 1.7  | 299 | 8.1 |
| 2020 | 2 | 16 | 16 | -4.8 | 107 | 0  | 107 | 1002 | 0.9  | 302 | 7.8 |
| 2020 | 2 | 16 | 17 | -4.6 | 56  | 0  | 56  | 1003 | -0.1 | 304 | 7   |
| 2020 | 2 | 16 | 18 | -4.4 | 17  | 19 | 18  | 1004 | -0.6 | 304 | 6.4 |
| 2020 | 2 | 16 | 19 | -4.4 | 0   | 0  | 0   | 1004 | -0.7 | 302 | 6.4 |
| 2020 | 2 | 16 | 20 | -4.4 | 0   | 0  | 0   | 1005 | -0.7 | 300 | 6.2 |
| 2020 | 2 | 16 | 21 | -4.3 | 0   | 0  | 0   | 1005 | -0.8 | 298 | 6   |
| 2020 | 2 | 16 | 22 | -4.3 | 0   | 0  | 0   | 1005 | -1.1 | 296 | 5.7 |
| 2020 | 2 | 16 | 23 | -4.1 | 0   | 0  | 0   | 1004 | -1   | 294 | 5.6 |
| 2020 | 2 | 17 | 0  | -3.9 | 0   | 0  | 0   | 1004 | -1   | 293 | 5.7 |
| 2020 | 2 | 17 | 1  | -4   | 0   | 0  | 0   | 1004 | -1   | 295 | 6   |
| 2020 | 2 | 17 | 2  | -4.1 | 0   | 0  | 0   | 1004 | -1   | 299 | 6.1 |
| 2020 | 2 | 17 | 3  | -4.2 | 0   | 0  | 0   | 1004 | -1.1 | 303 | 6.2 |
| 2020 | 2 | 17 | 4  | -4.6 | 0   | 0  | 0   | 1004 | -1.3 | 307 | 6.3 |
| 2020 | 2 | 17 | 5  | -5.3 | 0   | 0  | 0   | 1005 | -1.6 | 311 | 6.3 |
| 2020 | 2 | 17 | 6  | -5.8 | 0   | 0  | 0   | 1005 | -1.8 | 311 | 6.1 |
| 2020 | 2 | 17 | 7  | -5.7 | 0   | 0  | 0   | 1005 | -1.9 | 309 | 5.9 |
| 2020 | 2 | 17 | 8  | -5.7 | 7   | 0  | 7   | 1006 | -1.4 | 307 | 6.7 |
| 2020 | 2 | 17 | 9  | -6.3 | 26  | 0  | 26  | 1006 | -0.9 | 304 | 7.8 |
| 2020 | 2 | 17 | 10 | -6.7 | 142 | 0  | 142 | 1006 | -0.5 | 301 | 8.4 |
| 2020 | 2 | 17 | 11 | -6.8 | 175 | 2  | 176 | 1005 | -0.5 | 299 | 8.7 |
| 2020 | 2 | 17 | 12 | -6.8 | 230 | 14 | 239 | 1005 | -0.3 | 298 | 8.9 |
| 2020 | 2 | 17 | 13 | -6.6 | 313 | 78 | 365 | 1004 | -0.2 | 299 | 9   |
| 2020 | 2 | 17 | 14 | -6.5 | 227 | 15 | 236 | 1004 | -0.4 | 302 | 9   |
| 2020 | 2 | 17 | 15 | -6.7 | 93  | 0  | 93  | 1005 | -0.9 | 305 | 8.7 |
| 2020 | 2 | 17 | 16 | -6.9 | 62  | 0  | 62  | 1005 | -1.8 | 308 | 7.9 |
| 2020 | 2 | 17 | 17 | -6.9 | 47  | 0  | 47  | 1006 | -2.4 | 310 | 7.2 |
| 2020 | 2 | 17 | 18 | -7   | 6   | 0  | 6   | 1007 | -2.9 | 312 | 6.6 |
| 2020 | 2 | 17 | 19 | -7   | 0   | 0  | 0   | 1008 | -3.1 | 313 | 6.3 |

|      |   |    |    |      |     |     |     |      |      |     |     |
|------|---|----|----|------|-----|-----|-----|------|------|-----|-----|
| 2020 | 2 | 17 | 20 | -7   | 0   | 0   | 0   | 1008 | -3.3 | 315 | 6   |
| 2020 | 2 | 17 | 21 | -6.9 | 0   | 0   | 0   | 1009 | -3.3 | 316 | 5.7 |
| 2020 | 2 | 17 | 22 | -6.7 | 0   | 0   | 0   | 1009 | -3.3 | 316 | 5.3 |
| 2020 | 2 | 17 | 23 | -6.3 | 0   | 0   | 0   | 1010 | -3   | 317 | 5.2 |
| 2020 | 2 | 18 | 0  | -6.1 | 0   | 0   | 0   | 1010 | -3.1 | 319 | 4.9 |
| 2020 | 2 | 18 | 1  | -5.9 | 0   | 0   | 0   | 1010 | -3.1 | 321 | 4.8 |
| 2020 | 2 | 18 | 2  | -5.6 | 0   | 0   | 0   | 1010 | -2.9 | 322 | 4.9 |
| 2020 | 2 | 18 | 3  | -5.4 | 0   | 0   | 0   | 1010 | -2.7 | 325 | 4.8 |
| 2020 | 2 | 18 | 4  | -5.4 | 0   | 0   | 0   | 1011 | -2.7 | 328 | 4.9 |
| 2020 | 2 | 18 | 5  | -5.3 | 0   | 0   | 0   | 1012 | -2.7 | 330 | 4.9 |
| 2020 | 2 | 18 | 6  | -5.4 | 0   | 0   | 0   | 1012 | -2.8 | 332 | 4.4 |
| 2020 | 2 | 18 | 7  | -5.6 | 0   | 0   | 0   | 1013 | -2.6 | 334 | 4.4 |
| 2020 | 2 | 18 | 8  | -6   | 48  | 402 | 102 | 1014 | -1.3 | 332 | 5.2 |
| 2020 | 2 | 18 | 9  | -6   | 77  | 730 | 313 | 1015 | 0.1  | 330 | 5.5 |
| 2020 | 2 | 18 | 10 | -5.2 | 89  | 873 | 509 | 1015 | 1.4  | 331 | 5.5 |
| 2020 | 2 | 18 | 11 | -4.8 | 96  | 941 | 659 | 1014 | 2.5  | 332 | 5.3 |
| 2020 | 2 | 18 | 12 | -5   | 107 | 957 | 746 | 1014 | 3.5  | 331 | 5.2 |
| 2020 | 2 | 18 | 13 | -5   | 107 | 967 | 767 | 1014 | 4.1  | 330 | 5.1 |
| 2020 | 2 | 18 | 14 | -4.9 | 105 | 950 | 716 | 1013 | 4.3  | 329 | 4.9 |
| 2020 | 2 | 18 | 15 | -4.7 | 98  | 906 | 599 | 1013 | 4.1  | 325 | 4.6 |
| 2020 | 2 | 18 | 16 | -4.3 | 82  | 824 | 425 | 1014 | 3.2  | 323 | 3.9 |
| 2020 | 2 | 18 | 17 | -3.4 | 60  | 665 | 222 | 1014 | 0.5  | 322 | 2.1 |
| 2020 | 2 | 18 | 18 | -5.2 | 20  | 230 | 31  | 1014 | -2.9 | 325 | 1.5 |
| 2020 | 2 | 18 | 19 | -5.6 | 0   | 0   | 0   | 1015 | -3.6 | 330 | 1.4 |
| 2020 | 2 | 18 | 20 | -5.6 | 0   | 0   | 0   | 1015 | -4   | 333 | 1.4 |
| 2020 | 2 | 18 | 21 | -5.6 | 0   | 0   | 0   | 1016 | -4.1 | 334 | 1.3 |
| 2020 | 2 | 18 | 22 | -5.6 | 0   | 0   | 0   | 1016 | -4.2 | 338 | 1.3 |
| 2020 | 2 | 18 | 23 | -5.6 | 0   | 0   | 0   | 1016 | -4.2 | 342 | 1.2 |
| 2020 | 2 | 19 | 0  | -5.6 | 0   | 0   | 0   | 1016 | -4.3 | 342 | 1.2 |
| 2020 | 2 | 19 | 1  | -5.5 | 0   | 0   | 0   | 1016 | -4.4 | 346 | 1.2 |
| 2020 | 2 | 19 | 2  | -5.4 | 0   | 0   | 0   | 1016 | -4.4 | 350 | 1.2 |
| 2020 | 2 | 19 | 3  | -5.3 | 0   | 0   | 0   | 1016 | -4.4 | 347 | 1.2 |
| 2020 | 2 | 19 | 4  | -5.1 | 0   | 0   | 0   | 1016 | -4.2 | 350 | 1.2 |
| 2020 | 2 | 19 | 5  | -4.9 | 0   | 0   | 0   | 1016 | -3.9 | 359 | 1.2 |
| 2020 | 2 | 19 | 6  | -4.7 | 0   | 0   | 0   | 1017 | -3.5 | 9   | 1.2 |
| 2020 | 2 | 19 | 7  | -4.5 | 0   | 0   | 0   | 1017 | -2.7 | 18  | 1.5 |
| 2020 | 2 | 19 | 8  | -3.8 | 50  | 81  | 62  | 1017 | -0.7 | 22  | 1.7 |
| 2020 | 2 | 19 | 9  | -2.9 | 81  | 569 | 267 | 1017 | 2.3  | 0   | 1.6 |
| 2020 | 2 | 19 | 10 | -2.3 | 154 | 517 | 405 | 1017 | 4.7  | 348 | 1.7 |
| 2020 | 2 | 19 | 11 | -2.1 | 226 | 460 | 503 | 1017 | 6.7  | 342 | 1.9 |
| 2020 | 2 | 19 | 12 | -1.7 | 148 | 841 | 712 | 1016 | 8    | 335 | 1.9 |
| 2020 | 2 | 19 | 13 | -1.2 | 157 | 833 | 730 | 1016 | 8.7  | 330 | 2   |
| 2020 | 2 | 19 | 14 | -0.9 | 169 | 774 | 670 | 1015 | 8.9  | 331 | 2.1 |
| 2020 | 2 | 19 | 15 | -0.5 | 160 | 716 | 558 | 1015 | 8.6  | 329 | 2.2 |
| 2020 | 2 | 19 | 16 | 0.8  | 135 | 611 | 392 | 1015 | 7.6  | 330 | 1.9 |
| 2020 | 2 | 19 | 17 | 1.8  | 81  | 341 | 166 | 1016 | 4.8  | 332 | 1.2 |
| 2020 | 2 | 19 | 18 | 0.2  | 19  | 39  | 21  | 1016 | 2.5  | 338 | 1.4 |
| 2020 | 2 | 19 | 19 | 0    | 0   | 0   | 0   | 1016 | 2.1  | 350 | 1.3 |
| 2020 | 2 | 19 | 20 | -0.2 | 0   | 0   | 0   | 1017 | 1.7  | 354 | 1.3 |
| 2020 | 2 | 19 | 21 | -0.5 | 0   | 0   | 0   | 1017 | 1.3  | 2   | 1.3 |



|      |   |    |    |      |     |     |     |      |      |     |     |
|------|---|----|----|------|-----|-----|-----|------|------|-----|-----|
| 2020 | 2 | 19 | 22 | -0.8 | 0   | 0   | 0   | 1016 | 1    | 10  | 1.2 |
| 2020 | 2 | 19 | 23 | -1.1 | 0   | 0   | 0   | 1016 | 0.8  | 14  | 1.1 |
| 2020 | 2 | 20 | 0  | -1.4 | 0   | 0   | 0   | 1016 | 0.6  | 18  | 1.1 |
| 2020 | 2 | 20 | 1  | -1.6 | 0   | 0   | 0   | 1017 | 0.4  | 24  | 1.1 |
| 2020 | 2 | 20 | 2  | -1.8 | 0   | 0   | 0   | 1017 | 0.2  | 28  | 1.1 |
| 2020 | 2 | 20 | 3  | -2.2 | 0   | 0   | 0   | 1017 | -0.1 | 34  | 1.1 |
| 2020 | 2 | 20 | 4  | -2.6 | 0   | 0   | 0   | 1017 | -0.4 | 37  | 1.2 |
| 2020 | 2 | 20 | 5  | -3.1 | 0   | 0   | 0   | 1018 | -0.9 | 41  | 1.2 |
| 2020 | 2 | 20 | 6  | -3.6 | 0   | 0   | 0   | 1018 | -1.2 | 47  | 1.3 |
| 2020 | 2 | 20 | 7  | -3.1 | 0   | 0   | 0   | 1019 | -0.6 | 52  | 1.2 |
| 2020 | 2 | 20 | 8  | -1.1 | 51  | 301 | 94  | 1019 | 3.1  | 57  | 1.7 |
| 2020 | 2 | 20 | 9  | -0.6 | 101 | 569 | 290 | 1020 | 5.7  | 55  | 1.7 |
| 2020 | 2 | 20 | 10 | -1.1 | 133 | 701 | 476 | 1020 | 8.9  | 49  | 1.5 |
| 2020 | 2 | 20 | 11 | -1.4 | 153 | 766 | 618 | 1020 | 10.7 | 38  | 1.2 |
| 2020 | 2 | 20 | 12 | -1.4 | 165 | 797 | 704 | 1019 | 11.8 | 23  | 1.1 |
| 2020 | 2 | 20 | 13 | -1.2 | 172 | 785 | 715 | 1019 | 12.5 | 9   | 1   |
| 2020 | 2 | 20 | 14 | -1   | 169 | 758 | 664 | 1019 | 12.8 | 1   | 0.8 |
| 2020 | 2 | 20 | 15 | -0.9 | 170 | 661 | 541 | 1019 | 12.6 | 337 | 0.4 |
| 2020 | 2 | 20 | 16 | 0.9  | 142 | 557 | 378 | 1019 | 11.7 | 292 | 0.4 |
| 2020 | 2 | 20 | 17 | 2.1  | 95  | 366 | 187 | 1020 | 9    | 283 | 0.6 |
| 2020 | 2 | 20 | 18 | -0.1 | 17  | 51  | 20  | 1020 | 6.2  | 295 | 0.9 |
| 2020 | 2 | 20 | 19 | -0.4 | 0   | 0   | 0   | 1021 | 4.9  | 315 | 1   |
| 2020 | 2 | 20 | 20 | -1   | 0   | 0   | 0   | 1021 | 4.1  | 344 | 0.9 |
| 2020 | 2 | 20 | 21 | -1.5 | 0   | 0   | 0   | 1021 | 3.5  | 4   | 1   |
| 2020 | 2 | 20 | 22 | -2.1 | 0   | 0   | 0   | 1021 | 3.2  | 32  | 1   |
| 2020 | 2 | 20 | 23 | -2.7 | 0   | 0   | 0   | 1021 | 3.5  | 65  | 0.9 |
| 2020 | 2 | 21 | 0  | -2.3 | 0   | 0   | 0   | 1021 | 3.8  | 107 | 1   |
| 2020 | 2 | 21 | 1  | -1.3 | 0   | 0   | 0   | 1021 | 2.9  | 137 | 1.2 |
| 2020 | 2 | 21 | 2  | -0.9 | 0   | 0   | 0   | 1021 | 2.4  | 147 | 1.3 |
| 2020 | 2 | 21 | 3  | -0.8 | 0   | 0   | 0   | 1020 | 1.8  | 144 | 1.4 |
| 2020 | 2 | 21 | 4  | -0.9 | 0   | 0   | 0   | 1019 | 0.9  | 136 | 1.5 |
| 2020 | 2 | 21 | 5  | -0.8 | 0   | 0   | 0   | 1020 | -0.1 | 134 | 1.5 |
| 2020 | 2 | 21 | 6  | -0.8 | 0   | 0   | 0   | 1020 | -0.4 | 126 | 1.5 |
| 2020 | 2 | 21 | 7  | -0.4 | 0   | 0   | 0   | 1021 | 0.9  | 118 | 1.4 |
| 2020 | 2 | 21 | 8  | 0.9  | 60  | 246 | 97  | 1021 | 4.7  | 110 | 2.7 |
| 2020 | 2 | 21 | 9  | 2    | 117 | 355 | 236 | 1020 | 6.9  | 109 | 3.1 |
| 2020 | 2 | 21 | 10 | 3.4  | 142 | 678 | 477 | 1019 | 9.5  | 128 | 3.6 |
| 2020 | 2 | 21 | 11 | 4.3  | 176 | 610 | 550 | 1019 | 11.4 | 144 | 4.1 |
| 2020 | 2 | 21 | 12 | 5    | 283 | 406 | 560 | 1018 | 13.2 | 155 | 4.4 |
| 2020 | 2 | 21 | 13 | 5.3  | 156 | 818 | 726 | 1016 | 14   | 160 | 4.2 |
| 2020 | 2 | 21 | 14 | 5.3  | 167 | 767 | 670 | 1015 | 14.2 | 164 | 3.9 |
| 2020 | 2 | 21 | 15 | 5.4  | 153 | 711 | 555 | 1015 | 13.9 | 169 | 3.5 |
| 2020 | 2 | 21 | 16 | 6    | 171 | 42  | 189 | 1015 | 13   | 169 | 2.6 |
| 2020 | 2 | 21 | 17 | 7.4  | 97  | 42  | 107 | 1015 | 10.3 | 152 | 1.4 |
| 2020 | 2 | 21 | 18 | 6.1  | 15  | 0   | 15  | 1014 | 8.1  | 143 | 1.5 |
| 2020 | 2 | 21 | 19 | 6.3  | 0   | 0   | 0   | 1014 | 8.2  | 146 | 1.8 |
| 2020 | 2 | 21 | 20 | 6.4  | 0   | 0   | 0   | 1014 | 8    | 152 | 1.8 |
| 2020 | 2 | 21 | 21 | 6.6  | 0   | 0   | 0   | 1013 | 7.6  | 156 | 1.4 |
| 2020 | 2 | 21 | 22 | 6.8  | 0   | 0   | 0   | 1012 | 7.5  | 169 | 1.2 |
| 2020 | 2 | 21 | 23 | 7.2  | 0   | 0   | 0   | 1012 | 7.4  | 204 | 1.1 |

|      |   |    |    |      |     |     |     |      |      |     |     |
|------|---|----|----|------|-----|-----|-----|------|------|-----|-----|
| 2020 | 2 | 22 | 0  | 7.6  | 0   | 0   | 0   | 1011 | 7.6  | 250 | 1.8 |
| 2020 | 2 | 22 | 1  | 7.5  | 0   | 0   | 0   | 1011 | 7.5  | 272 | 2.9 |
| 2020 | 2 | 22 | 2  | 7.2  | 0   | 0   | 0   | 1011 | 7.2  | 285 | 3.8 |
| 2020 | 2 | 22 | 3  | 6.8  | 0   | 0   | 0   | 1011 | 7    | 295 | 4.6 |
| 2020 | 2 | 22 | 4  | 6.1  | 0   | 0   | 0   | 1011 | 6.5  | 305 | 4.9 |
| 2020 | 2 | 22 | 5  | 4.8  | 0   | 0   | 0   | 1012 | 5.6  | 315 | 4.8 |
| 2020 | 2 | 22 | 6  | 3.3  | 0   | 0   | 0   | 1013 | 3.3  | 318 | 2.6 |
| 2020 | 2 | 22 | 7  | 3.3  | 0   | 0   | 0   | 1013 | 3.3  | 312 | 2.2 |
| 2020 | 2 | 22 | 8  | 3.4  | 62  | 204 | 93  | 1014 | 4.9  | 304 | 2.9 |
| 2020 | 2 | 22 | 9  | 1.9  | 122 | 489 | 288 | 1014 | 7.2  | 300 | 3.8 |
| 2020 | 2 | 22 | 10 | -0.6 | 153 | 646 | 475 | 1014 | 9.1  | 296 | 5   |
| 2020 | 2 | 22 | 11 | -1.8 | 171 | 726 | 619 | 1014 | 10.2 | 290 | 5.8 |
| 2020 | 2 | 22 | 12 | -1.7 | 314 | 75  | 365 | 1014 | 10.5 | 286 | 6.4 |
| 2020 | 2 | 22 | 13 | -1.1 | 319 | 69  | 367 | 1013 | 10.5 | 284 | 6.8 |
| 2020 | 2 | 22 | 14 | -0.2 | 310 | 233 | 464 | 1013 | 10   | 285 | 6.9 |
| 2020 | 2 | 22 | 15 | 0.7  | 232 | 364 | 439 | 1013 | 8.9  | 289 | 6.7 |
| 2020 | 2 | 22 | 16 | 0.6  | 194 | 393 | 364 | 1014 | 7.4  | 295 | 6.1 |
| 2020 | 2 | 22 | 17 | -0.2 | 111 | 314 | 192 | 1015 | 5.3  | 299 | 4.9 |
| 2020 | 2 | 22 | 18 | -0.3 | 23  | 74  | 27  | 1015 | 3    | 302 | 3.5 |
| 2020 | 2 | 22 | 19 | -0.5 | 0   | 0   | 0   | 1016 | 2.1  | 304 | 3.3 |
| 2020 | 2 | 22 | 20 | -0.7 | 0   | 0   | 0   | 1017 | 1.7  | 308 | 3.3 |
| 2020 | 2 | 22 | 21 | -0.9 | 0   | 0   | 0   | 1017 | 1.4  | 314 | 3.3 |
| 2020 | 2 | 22 | 22 | -1.4 | 0   | 0   | 0   | 1017 | 0.7  | 319 | 3   |
| 2020 | 2 | 22 | 23 | -2   | 0   | 0   | 0   | 1017 | 0    | 323 | 2.8 |
| 2020 | 2 | 23 | 0  | -2.6 | 0   | 0   | 0   | 1017 | -0.6 | 325 | 2.5 |
| 2020 | 2 | 23 | 1  | -3.1 | 0   | 0   | 0   | 1017 | -1.1 | 328 | 2.3 |
| 2020 | 2 | 23 | 2  | -3.3 | 0   | 0   | 0   | 1017 | -1.6 | 330 | 2.1 |
| 2020 | 2 | 23 | 3  | -3.4 | 0   | 0   | 0   | 1017 | -2.2 | 333 | 1.9 |
| 2020 | 2 | 23 | 4  | -3.5 | 0   | 0   | 0   | 1018 | -2.6 | 337 | 1.7 |
| 2020 | 2 | 23 | 5  | -3.6 | 0   | 0   | 0   | 1018 | -3   | 344 | 1.5 |
| 2020 | 2 | 23 | 6  | -3.7 | 0   | 0   | 0   | 1018 | -3.1 | 352 | 1.3 |
| 2020 | 2 | 23 | 7  | -3.1 | 0   | 0   | 0   | 1018 | -1.7 | 0   | 1.2 |
| 2020 | 2 | 23 | 8  | -3   | 50  | 457 | 122 | 1019 | 1.7  | 358 | 2.2 |
| 2020 | 2 | 23 | 9  | -3.1 | 80  | 730 | 332 | 1019 | 3.6  | 347 | 2.3 |
| 2020 | 2 | 23 | 10 | -3.3 | 95  | 857 | 526 | 1019 | 5.2  | 337 | 2.1 |
| 2020 | 2 | 23 | 11 | -3.2 | 101 | 925 | 676 | 1018 | 6.7  | 323 | 2.1 |
| 2020 | 2 | 23 | 12 | -2.9 | 99  | 958 | 760 | 1017 | 7.9  | 308 | 2.1 |
| 2020 | 2 | 23 | 13 | -2.6 | 101 | 963 | 780 | 1016 | 8.8  | 292 | 2.4 |
| 2020 | 2 | 23 | 14 | -2.5 | 101 | 942 | 728 | 1016 | 9.2  | 284 | 2.8 |
| 2020 | 2 | 23 | 15 | -2.7 | 96  | 898 | 611 | 1015 | 9.1  | 281 | 3   |
| 2020 | 2 | 23 | 16 | -2.7 | 84  | 818 | 441 | 1015 | 8.2  | 282 | 2.8 |
| 2020 | 2 | 23 | 17 | 0.3  | 66  | 657 | 238 | 1015 | 5.6  | 283 | 1.4 |
| 2020 | 2 | 23 | 18 | -1.5 | 26  | 226 | 40  | 1015 | 1.9  | 287 | 1.2 |
| 2020 | 2 | 23 | 19 | -2.3 | 0   | 0   | 0   | 1015 | 1    | 291 | 1.2 |
| 2020 | 2 | 23 | 20 | -2.9 | 0   | 0   | 0   | 1015 | 0.5  | 293 | 1.2 |
| 2020 | 2 | 23 | 21 | -3.1 | 0   | 0   | 0   | 1015 | 0.4  | 293 | 1.1 |
| 2020 | 2 | 23 | 22 | -3   | 0   | 0   | 0   | 1015 | 0.5  | 293 | 0.9 |
| 2020 | 2 | 23 | 23 | -3   | 0   | 0   | 0   | 1015 | 0.9  | 288 | 0.5 |
| 2020 | 2 | 24 | 0  | -3.1 | 0   | 0   | 0   | 1014 | 0.8  | 155 | 0.2 |
| 2020 | 2 | 24 | 1  | -3.2 | 0   | 0   | 0   | 1014 | 0    | 139 | 0.6 |

|      |   |    |    |      |     |     |     |      |      |     |     |
|------|---|----|----|------|-----|-----|-----|------|------|-----|-----|
| 2020 | 2 | 24 | 2  | -3.4 | 0   | 0   | 0   | 1014 | -0.6 | 147 | 0.9 |
| 2020 | 2 | 24 | 3  | -3.7 | 0   | 0   | 0   | 1013 | -1.1 | 153 | 1   |
| 2020 | 2 | 24 | 4  | -3.9 | 0   | 0   | 0   | 1013 | -1.3 | 156 | 1.1 |
| 2020 | 2 | 24 | 5  | -4   | 0   | 0   | 0   | 1014 | -1.5 | 158 | 1.1 |
| 2020 | 2 | 24 | 6  | -4   | 0   | 0   | 0   | 1014 | -1.4 | 156 | 1.2 |
| 2020 | 2 | 24 | 7  | -2.7 | 0   | 0   | 0   | 1014 | -0.2 | 149 | 1.1 |
| 2020 | 2 | 24 | 8  | -1.3 | 58  | 143 | 81  | 1014 | 3.4  | 140 | 2   |
| 2020 | 2 | 24 | 9  | 0.2  | 119 | 538 | 307 | 1014 | 5.8  | 136 | 2.3 |
| 2020 | 2 | 24 | 10 | 2.1  | 151 | 666 | 489 | 1013 | 9.4  | 170 | 2.5 |
| 2020 | 2 | 24 | 11 | 3.1  | 175 | 732 | 633 | 1013 | 11.4 | 183 | 2.7 |
| 2020 | 2 | 24 | 12 | 3.8  | 146 | 850 | 737 | 1012 | 12.2 | 185 | 2.6 |
| 2020 | 2 | 24 | 13 | 4.3  | 291 | 431 | 597 | 1011 | 12.6 | 186 | 2.5 |
| 2020 | 2 | 24 | 14 | 4.8  | 214 | 575 | 599 | 1010 | 12.8 | 186 | 2.3 |
| 2020 | 2 | 24 | 15 | 5.3  | 190 | 528 | 495 | 1010 | 13.4 | 185 | 2.2 |
| 2020 | 2 | 24 | 16 | 6.2  | 146 | 2   | 147 | 1010 | 13.1 | 178 | 1.7 |
| 2020 | 2 | 24 | 17 | 7.7  | 60  | 0   | 60  | 1010 | 10.8 | 162 | 0.9 |
| 2020 | 2 | 24 | 18 | 6.2  | 24  | 1   | 24  | 1010 | 9    | 148 | 1.1 |
| 2020 | 2 | 24 | 19 | 6.5  | 0   | 0   | 0   | 1009 | 8.5  | 145 | 1.2 |
| 2020 | 2 | 24 | 20 | 6.9  | 0   | 0   | 0   | 1009 | 8.4  | 147 | 1.2 |
| 2020 | 2 | 24 | 21 | 7.3  | 0   | 0   | 0   | 1009 | 8.3  | 145 | 1.3 |
| 2020 | 2 | 24 | 22 | 7.7  | 0   | 0   | 0   | 1008 | 8.5  | 137 | 1.7 |
| 2020 | 2 | 24 | 23 | 8.1  | 0   | 0   | 0   | 1007 | 8.8  | 132 | 2.3 |
| 2020 | 2 | 25 | 0  | 8.5  | 0   | 0   | 0   | 1006 | 9    | 137 | 2.7 |
| 2020 | 2 | 25 | 1  | 9.2  | 0   | 0   | 0   | 1006 | 9.4  | 146 | 3   |
| 2020 | 2 | 25 | 2  | 9.9  | 0   | 0   | 0   | 1005 | 10.1 | 151 | 3.3 |
| 2020 | 2 | 25 | 3  | 10.6 | 0   | 0   | 0   | 1004 | 10.9 | 159 | 3.5 |
| 2020 | 2 | 25 | 4  | 11.1 | 0   | 0   | 0   | 1003 | 11.4 | 170 | 3.7 |
| 2020 | 2 | 25 | 5  | 11.6 | 0   | 0   | 0   | 1002 | 12   | 180 | 4.3 |
| 2020 | 2 | 25 | 6  | 11.9 | 0   | 0   | 0   | 1002 | 12.2 | 185 | 4.7 |
| 2020 | 2 | 25 | 7  | 12.2 | 0   | 0   | 0   | 1001 | 12.6 | 189 | 4.9 |
| 2020 | 2 | 25 | 8  | 12.8 | 8   | 0   | 8   | 1001 | 13.4 | 192 | 4.7 |
| 2020 | 2 | 25 | 9  | 13.5 | 23  | 0   | 23  | 1001 | 14.3 | 196 | 4.4 |
| 2020 | 2 | 25 | 10 | 14.1 | 40  | 0   | 40  | 1000 | 15.1 | 203 | 4.4 |
| 2020 | 2 | 25 | 11 | 14.4 | 53  | 0   | 53  | 1000 | 15.4 | 215 | 4.3 |
| 2020 | 2 | 25 | 12 | 14.5 | 48  | 0   | 48  | 999  | 15.6 | 230 | 4.6 |
| 2020 | 2 | 25 | 13 | 14.1 | 69  | 0   | 69  | 999  | 15.9 | 242 | 4.9 |
| 2020 | 2 | 25 | 14 | 13.4 | 59  | 0   | 59  | 998  | 15.3 | 251 | 4.4 |
| 2020 | 2 | 25 | 15 | 12.8 | 48  | 0   | 48  | 999  | 14.7 | 265 | 3.7 |
| 2020 | 2 | 25 | 16 | 12.3 | 32  | 0   | 32  | 999  | 14   | 281 | 3   |
| 2020 | 2 | 25 | 17 | 11.9 | 15  | 0   | 15  | 1000 | 12.8 | 296 | 1.9 |
| 2020 | 2 | 25 | 18 | 10.8 | 4   | 0   | 4   | 1000 | 10.8 | 313 | 1.1 |
| 2020 | 2 | 25 | 19 | 10.3 | 0   | 0   | 0   | 1001 | 10.3 | 329 | 1   |
| 2020 | 2 | 25 | 20 | 10.1 | 0   | 0   | 0   | 1002 | 10.1 | 5   | 0.6 |
| 2020 | 2 | 25 | 21 | 9.6  | 0   | 0   | 0   | 1003 | 9.9  | 62  | 0.8 |
| 2020 | 2 | 25 | 22 | 8.8  | 0   | 0   | 0   | 1004 | 9.6  | 83  | 2   |
| 2020 | 2 | 25 | 23 | 7.7  | 0   | 0   | 0   | 1005 | 8.7  | 89  | 2.4 |
| 2020 | 2 | 26 | 0  | 6.7  | 0   | 0   | 0   | 1005 | 7.9  | 88  | 2.3 |
| 2020 | 2 | 26 | 1  | 6.1  | 0   | 0   | 0   | 1006 | 7.4  | 79  | 2.1 |
| 2020 | 2 | 26 | 2  | 5.7  | 0   | 0   | 0   | 1006 | 7.1  | 70  | 2   |
| 2020 | 2 | 26 | 3  | 5.6  | 0   | 0   | 0   | 1006 | 6.9  | 66  | 1.9 |

|      |   |    |    |      |     |     |     |      |      |     |     |
|------|---|----|----|------|-----|-----|-----|------|------|-----|-----|
| 2020 | 2 | 26 | 4  | 5.6  | 0   | 0   | 0   | 1007 | 6.6  | 61  | 1.6 |
| 2020 | 2 | 26 | 5  | 5.4  | 0   | 0   | 0   | 1007 | 6.2  | 57  | 1.3 |
| 2020 | 2 | 26 | 6  | 5.2  | 0   | 0   | 0   | 1008 | 5.9  | 54  | 1   |
| 2020 | 2 | 26 | 7  | 5.2  | 0   | 0   | 0   | 1009 | 6.3  | 48  | 1.1 |
| 2020 | 2 | 26 | 8  | 5.3  | 74  | 246 | 116 | 1010 | 7.9  | 46  | 1.4 |
| 2020 | 2 | 26 | 9  | 5.8  | 131 | 512 | 314 | 1010 | 10.2 | 26  | 1.1 |
| 2020 | 2 | 26 | 10 | 6.3  | 111 | 0   | 111 | 1010 | 12.5 | 352 | 1.6 |
| 2020 | 2 | 26 | 11 | 6.6  | 88  | 0   | 88  | 1009 | 13.9 | 336 | 2.3 |
| 2020 | 2 | 26 | 12 | 6.6  | 341 | 184 | 471 | 1009 | 14.5 | 327 | 2.9 |
| 2020 | 2 | 26 | 13 | 6.4  | 190 | 769 | 742 | 1008 | 14.6 | 322 | 3.3 |
| 2020 | 2 | 26 | 14 | 6    | 181 | 751 | 691 | 1008 | 13.9 | 318 | 3.9 |
| 2020 | 2 | 26 | 15 | 5.5  | 258 | 279 | 422 | 1009 | 12.9 | 317 | 4.3 |
| 2020 | 2 | 26 | 16 | 5.1  | 137 | 620 | 414 | 1009 | 11.3 | 319 | 4.4 |
| 2020 | 2 | 26 | 17 | 5    | 99  | 438 | 219 | 1010 | 9    | 320 | 3.9 |
| 2020 | 2 | 26 | 18 | 4.8  | 29  | 95  | 36  | 1011 | 6.3  | 321 | 3.3 |
| 2020 | 2 | 26 | 19 | 4.6  | 0   | 0   | 0   | 1011 | 5.2  | 326 | 3.6 |
| 2020 | 2 | 26 | 20 | 4.3  | 0   | 0   | 0   | 1012 | 5.1  | 331 | 3.9 |
| 2020 | 2 | 26 | 21 | 3.5  | 0   | 0   | 0   | 1012 | 4.9  | 334 | 3.8 |
| 2020 | 2 | 26 | 22 | 2.4  | 0   | 0   | 0   | 1013 | 4.2  | 336 | 3.4 |
| 2020 | 2 | 26 | 23 | 1.5  | 0   | 0   | 0   | 1013 | 2.6  | 335 | 2.2 |
| 2020 | 2 | 27 | 0  | 1.2  | 0   | 0   | 0   | 1013 | 1.4  | 333 | 1.8 |
| 2020 | 2 | 27 | 1  | 0.8  | 0   | 0   | 0   | 1013 | 0.8  | 336 | 1.7 |
| 2020 | 2 | 27 | 2  | 0.4  | 0   | 0   | 0   | 1013 | 0.4  | 341 | 1.7 |
| 2020 | 2 | 27 | 3  | 0    | 0   | 0   | 0   | 1013 | 0    | 348 | 1.6 |
| 2020 | 2 | 27 | 4  | -0.3 | 0   | 0   | 0   | 1013 | -0.3 | 358 | 1.5 |
| 2020 | 2 | 27 | 5  | -0.1 | 0   | 0   | 0   | 1014 | -0.1 | 10  | 1.4 |
| 2020 | 2 | 27 | 6  | 0.9  | 0   | 0   | 0   | 1014 | 0.9  | 22  | 1.9 |
| 2020 | 2 | 27 | 7  | 0.8  | 0   | 0   | 0   | 1015 | 1.3  | 35  | 2.4 |
| 2020 | 2 | 27 | 8  | 1.4  | 73  | 284 | 122 | 1015 | 2.5  | 47  | 2.6 |
| 2020 | 2 | 27 | 9  | 1.8  | 121 | 564 | 326 | 1015 | 5.7  | 47  | 2.7 |
| 2020 | 2 | 27 | 10 | 1.6  | 145 | 706 | 513 | 1015 | 8.3  | 45  | 2.5 |
| 2020 | 2 | 27 | 11 | 1.6  | 157 | 785 | 660 | 1015 | 9.8  | 47  | 1.9 |
| 2020 | 2 | 27 | 12 | 1.6  | 217 | 715 | 724 | 1015 | 10.9 | 55  | 1.4 |
| 2020 | 2 | 27 | 13 | 1.6  | 202 | 757 | 749 | 1014 | 11.6 | 78  | 0.9 |
| 2020 | 2 | 27 | 14 | 1.7  | 192 | 740 | 697 | 1014 | 12   | 130 | 0.8 |
| 2020 | 2 | 27 | 15 | 1.7  | 208 | 613 | 570 | 1013 | 11.8 | 165 | 1.1 |
| 2020 | 2 | 27 | 16 | 2    | 175 | 514 | 407 | 1013 | 11.1 | 171 | 1.5 |
| 2020 | 2 | 27 | 17 | 4.6  | 120 | 332 | 212 | 1013 | 9    | 172 | 1   |
| 2020 | 2 | 27 | 18 | 3    | 11  | 0   | 11  | 1014 | 6.6  | 183 | 0.9 |
| 2020 | 2 | 27 | 19 | 2.8  | 0   | 0   | 0   | 1015 | 5.8  | 177 | 0.9 |
| 2020 | 2 | 27 | 20 | 2.8  | 0   | 0   | 0   | 1015 | 5.2  | 156 | 0.9 |
| 2020 | 2 | 27 | 21 | 1.8  | 0   | 0   | 0   | 1015 | 3.7  | 149 | 1.1 |
| 2020 | 2 | 27 | 22 | 1.4  | 0   | 0   | 0   | 1015 | 2.9  | 149 | 1.2 |
| 2020 | 2 | 27 | 23 | 1.3  | 0   | 0   | 0   | 1015 | 2.3  | 141 | 1.2 |
| 2020 | 2 | 28 | 0  | 1.4  | 0   | 0   | 0   | 1014 | 2    | 134 | 1.5 |
| 2020 | 2 | 28 | 1  | 1.6  | 0   | 0   | 0   | 1013 | 2.3  | 130 | 1.8 |
| 2020 | 2 | 28 | 2  | 1.8  | 0   | 0   | 0   | 1013 | 2.7  | 130 | 1.7 |
| 2020 | 2 | 28 | 3  | 1.9  | 0   | 0   | 0   | 1012 | 3.1  | 128 | 1.8 |
| 2020 | 2 | 28 | 4  | 2.2  | 0   | 0   | 0   | 1012 | 3.5  | 124 | 2.2 |
| 2020 | 2 | 28 | 5  | 2.5  | 0   | 0   | 0   | 1011 | 4    | 122 | 2.4 |

|      |   |    |    |      |     |     |     |      |      |     |     |
|------|---|----|----|------|-----|-----|-----|------|------|-----|-----|
| 2020 | 2 | 28 | 6  | 2.6  | 0   | 0   | 0   | 1011 | 4.1  | 116 | 2.2 |
| 2020 | 2 | 28 | 7  | 2.8  | 0   | 0   | 0   | 1011 | 4.4  | 113 | 2.2 |
| 2020 | 2 | 28 | 8  | 3.3  | 11  | 0   | 11  | 1012 | 5.6  | 111 | 2.8 |
| 2020 | 2 | 28 | 9  | 3.8  | 45  | 0   | 45  | 1012 | 6.3  | 107 | 2.7 |
| 2020 | 2 | 28 | 10 | 4.2  | 74  | 0   | 74  | 1012 | 6.8  | 112 | 3.7 |
| 2020 | 2 | 28 | 11 | 4.2  | 51  | 0   | 51  | 1010 | 7.7  | 118 | 5.2 |
| 2020 | 2 | 28 | 12 | 4.2  | 113 | 0   | 113 | 1010 | 8.2  | 122 | 4.6 |
| 2020 | 2 | 28 | 13 | 4    | 119 | 0   | 119 | 1009 | 7.1  | 119 | 4.9 |
| 2020 | 2 | 28 | 14 | 4.2  | 125 | 0   | 125 | 1008 | 7.2  | 118 | 5   |
| 2020 | 2 | 28 | 15 | 4.1  | 38  | 0   | 38  | 1008 | 6.7  | 118 | 4.7 |
| 2020 | 2 | 28 | 16 | 4.1  | 34  | 0   | 34  | 1007 | 6.4  | 116 | 4.6 |
| 2020 | 2 | 28 | 17 | 4.2  | 32  | 0   | 32  | 1007 | 5.8  | 116 | 4   |
| 2020 | 2 | 28 | 18 | 4.2  | 7   | 0   | 7   | 1006 | 5    | 115 | 3.3 |
| 2020 | 2 | 28 | 19 | 4    | 0   | 0   | 0   | 1006 | 4.4  | 113 | 3.1 |
| 2020 | 2 | 28 | 20 | 3.6  | 0   | 0   | 0   | 1006 | 3.6  | 112 | 2.7 |
| 2020 | 2 | 28 | 21 | 3.4  | 0   | 0   | 0   | 1006 | 3.4  | 110 | 2.7 |
| 2020 | 2 | 28 | 22 | 3.5  | 0   | 0   | 0   | 1006 | 3.5  | 107 | 2.7 |
| 2020 | 2 | 28 | 23 | 3.5  | 0   | 0   | 0   | 1006 | 3.7  | 103 | 2.9 |
| 2020 | 3 | 1  | 0  | 4    | 0   | 0   | 0   | 1005 | 5.4  | 56  | 0.8 |
| 2020 | 3 | 1  | 1  | 4    | 0   | 0   | 0   | 1005 | 5.1  | 79  | 0.8 |
| 2020 | 3 | 1  | 2  | 4    | 0   | 0   | 0   | 1005 | 4.6  | 88  | 0.8 |
| 2020 | 3 | 1  | 3  | 3.9  | 0   | 0   | 0   | 1005 | 3.9  | 85  | 0.8 |
| 2020 | 3 | 1  | 4  | 3.5  | 0   | 0   | 0   | 1005 | 3.5  | 83  | 0.8 |
| 2020 | 3 | 1  | 5  | 2.9  | 0   | 0   | 0   | 1005 | 2.9  | 87  | 0.9 |
| 2020 | 3 | 1  | 6  | 2.7  | 0   | 0   | 0   | 1005 | 2.7  | 89  | 1   |
| 2020 | 3 | 1  | 7  | 3.4  | 0   | 0   | 0   | 1006 | 3.4  | 89  | 0.9 |
| 2020 | 3 | 1  | 8  | 4.4  | 35  | 0   | 35  | 1006 | 5.4  | 93  | 1.3 |
| 2020 | 3 | 1  | 9  | 5.1  | 91  | 0   | 91  | 1006 | 8    | 105 | 1.1 |
| 2020 | 3 | 1  | 10 | 5.4  | 228 | 59  | 260 | 1006 | 10.4 | 140 | 0.7 |
| 2020 | 3 | 1  | 11 | 5.8  | 202 | 7   | 207 | 1005 | 11.9 | 195 | 0.6 |
| 2020 | 3 | 1  | 12 | 6.1  | 353 | 158 | 467 | 1005 | 12.8 | 241 | 1.1 |
| 2020 | 3 | 1  | 13 | 6.5  | 362 | 167 | 485 | 1004 | 13.3 | 257 | 2.1 |
| 2020 | 3 | 1  | 14 | 6.3  | 308 | 57  | 347 | 1004 | 12.7 | 272 | 2.8 |
| 2020 | 3 | 1  | 15 | 5.9  | 153 | 0   | 153 | 1004 | 11.6 | 286 | 3.1 |
| 2020 | 3 | 1  | 16 | 5.1  | 47  | 0   | 47  | 1004 | 10.5 | 295 | 3.3 |
| 2020 | 3 | 1  | 17 | 4.2  | 18  | 0   | 18  | 1004 | 8.5  | 307 | 3.1 |
| 2020 | 3 | 1  | 18 | 3.2  | 5   | 0   | 5   | 1005 | 5.2  | 316 | 2.4 |
| 2020 | 3 | 1  | 19 | 2.6  | 0   | 0   | 0   | 1006 | 3.8  | 321 | 2.6 |
| 2020 | 3 | 1  | 20 | 2.6  | 0   | 0   | 0   | 1006 | 3    | 322 | 2.6 |
| 2020 | 3 | 1  | 21 | 2.8  | 0   | 0   | 0   | 1007 | 2.9  | 321 | 2.8 |
| 2020 | 3 | 1  | 22 | 2.9  | 0   | 0   | 0   | 1007 | 3.4  | 320 | 3.4 |
| 2020 | 3 | 1  | 23 | 2.8  | 0   | 0   | 0   | 1007 | 3.5  | 321 | 3.6 |
| 2020 | 3 | 2  | 0  | 2.5  | 0   | 0   | 0   | 1007 | 3.5  | 324 | 3.8 |
| 2020 | 3 | 2  | 1  | 2.1  | 0   | 0   | 0   | 1008 | 3.5  | 328 | 4.2 |
| 2020 | 3 | 2  | 2  | 1.8  | 0   | 0   | 0   | 1008 | 3.4  | 331 | 4.4 |
| 2020 | 3 | 2  | 3  | 1.2  | 0   | 0   | 0   | 1008 | 3.2  | 335 | 4.6 |
| 2020 | 3 | 2  | 4  | 0.6  | 0   | 0   | 0   | 1008 | 2.1  | 338 | 3.7 |
| 2020 | 3 | 2  | 5  | 0    | 0   | 0   | 0   | 1008 | 1.1  | 338 | 3   |
| 2020 | 3 | 2  | 6  | -0.5 | 0   | 0   | 0   | 1009 | 0.5  | 337 | 2.7 |
| 2020 | 3 | 2  | 7  | -0.7 | 0   | 0   | 0   | 1010 | 1.9  | 338 | 3.8 |

|      |   |   |    |      |     |     |     |      |      |     |     |
|------|---|---|----|------|-----|-----|-----|------|------|-----|-----|
| 2020 | 3 | 2 | 8  | -1.4 | 77  | 353 | 145 | 1010 | 3.8  | 340 | 5.5 |
| 2020 | 3 | 2 | 9  | -2.5 | 115 | 635 | 357 | 1011 | 4.9  | 340 | 6   |
| 2020 | 3 | 2 | 10 | -2.7 | 130 | 784 | 554 | 1011 | 6.1  | 339 | 5.9 |
| 2020 | 3 | 2 | 11 | -2.5 | 141 | 852 | 702 | 1010 | 7.2  | 338 | 5.8 |
| 2020 | 3 | 2 | 12 | -2.3 | 150 | 877 | 788 | 1010 | 7.9  | 337 | 5.7 |
| 2020 | 3 | 2 | 13 | -2.1 | 145 | 895 | 808 | 1010 | 8.3  | 338 | 5.6 |
| 2020 | 3 | 2 | 14 | -2.1 | 137 | 885 | 756 | 1009 | 8.4  | 340 | 5.4 |
| 2020 | 3 | 2 | 15 | -2.2 | 130 | 836 | 636 | 1009 | 8    | 342 | 5.1 |
| 2020 | 3 | 2 | 16 | -2.2 | 118 | 728 | 458 | 1010 | 7    | 343 | 4.6 |
| 2020 | 3 | 2 | 17 | -1.4 | 93  | 544 | 250 | 1011 | 5.1  | 337 | 3.4 |
| 2020 | 3 | 2 | 18 | -0.6 | 37  | 188 | 54  | 1011 | 2.4  | 336 | 2.2 |
| 2020 | 3 | 2 | 19 | -0.9 | 0   | 0   | 0   | 1012 | 1.5  | 338 | 2.3 |
| 2020 | 3 | 2 | 20 | -0.9 | 0   | 0   | 0   | 1012 | 1.1  | 349 | 2.1 |
| 2020 | 3 | 2 | 21 | -1   | 0   | 0   | 0   | 1012 | 0.9  | 0   | 1.9 |
| 2020 | 3 | 2 | 22 | -1.1 | 0   | 0   | 0   | 1012 | 0.6  | 17  | 1.7 |
| 2020 | 3 | 2 | 23 | -1.3 | 0   | 0   | 0   | 1011 | 0.4  | 32  | 1.4 |
| 2020 | 3 | 3 | 0  | -1.3 | 0   | 0   | 0   | 1011 | 0.4  | 44  | 1.1 |
| 2020 | 3 | 3 | 1  | -1.2 | 0   | 0   | 0   | 1011 | 0.7  | 53  | 1   |
| 2020 | 3 | 3 | 2  | -1.1 | 0   | 0   | 0   | 1011 | 0.9  | 63  | 0.9 |
| 2020 | 3 | 3 | 3  | -1.1 | 0   | 0   | 0   | 1011 | 1    | 73  | 0.9 |
| 2020 | 3 | 3 | 4  | -1.1 | 0   | 0   | 0   | 1011 | 0.9  | 83  | 0.9 |
| 2020 | 3 | 3 | 5  | -1.4 | 0   | 0   | 0   | 1012 | 0.3  | 94  | 1.1 |
| 2020 | 3 | 3 | 6  | -0.7 | 0   | 0   | 0   | 1012 | 0.2  | 100 | 1.4 |
| 2020 | 3 | 3 | 7  | 0.9  | 0   | 0   | 0   | 1012 | 1.9  | 103 | 2.4 |
| 2020 | 3 | 3 | 8  | 2.9  | 72  | 37  | 79  | 1012 | 4.7  | 109 | 3.7 |
| 2020 | 3 | 3 | 9  | 4.8  | 164 | 426 | 329 | 1012 | 8    | 121 | 4.4 |
| 2020 | 3 | 3 | 10 | 5.7  | 222 | 344 | 410 | 1011 | 10.4 | 135 | 4.7 |
| 2020 | 3 | 3 | 11 | 6.2  | 311 | 232 | 464 | 1010 | 11.8 | 144 | 4.6 |
| 2020 | 3 | 3 | 12 | 6.3  | 352 | 235 | 524 | 1010 | 12.1 | 152 | 4.2 |
| 2020 | 3 | 3 | 13 | 6.4  | 351 | 84  | 414 | 1010 | 11.8 | 160 | 3.8 |
| 2020 | 3 | 3 | 14 | 6.6  | 337 | 120 | 421 | 1010 | 11.4 | 164 | 3.4 |
| 2020 | 3 | 3 | 15 | 6.6  | 274 | 82  | 324 | 1009 | 11   | 167 | 2.9 |
| 2020 | 3 | 3 | 16 | 6.8  | 202 | 89  | 243 | 1009 | 10.6 | 175 | 2.2 |
| 2020 | 3 | 3 | 17 | 7.7  | 105 | 9   | 107 | 1009 | 9.4  | 201 | 0.7 |
| 2020 | 3 | 3 | 18 | 7.1  | 22  | 0   | 22  | 1009 | 8.5  | 248 | 0.5 |
| 2020 | 3 | 3 | 19 | 6.3  | 0   | 0   | 0   | 1009 | 7.9  | 292 | 0.8 |
| 2020 | 3 | 3 | 20 | 5.4  | 0   | 0   | 0   | 1010 | 6.9  | 315 | 1.4 |
| 2020 | 3 | 3 | 21 | 4.7  | 0   | 0   | 0   | 1010 | 6    | 324 | 1.8 |
| 2020 | 3 | 3 | 22 | 4    | 0   | 0   | 0   | 1010 | 5.5  | 332 | 2.2 |
| 2020 | 3 | 3 | 23 | 3.5  | 0   | 0   | 0   | 1009 | 5    | 336 | 2.6 |
| 2020 | 3 | 4 | 0  | 3.1  | 0   | 0   | 0   | 1009 | 4.6  | 334 | 2.7 |
| 2020 | 3 | 4 | 1  | 2.9  | 0   | 0   | 0   | 1010 | 4.2  | 331 | 2.5 |
| 2020 | 3 | 4 | 2  | 2.4  | 0   | 0   | 0   | 1009 | 3.3  | 331 | 2   |
| 2020 | 3 | 4 | 3  | 2    | 0   | 0   | 0   | 1009 | 2.1  | 327 | 1.6 |
| 2020 | 3 | 4 | 4  | 1.8  | 0   | 0   | 0   | 1009 | 1.8  | 321 | 1.4 |
| 2020 | 3 | 4 | 5  | 2.2  | 0   | 0   | 0   | 1009 | 2.4  | 316 | 1.6 |
| 2020 | 3 | 4 | 6  | 2.5  | 0   | 0   | 0   | 1010 | 3.2  | 317 | 2.3 |
| 2020 | 3 | 4 | 7  | 2.2  | 0   | 0   | 0   | 1010 | 3.9  | 320 | 3.3 |
| 2020 | 3 | 4 | 8  | 0.7  | 75  | 149 | 105 | 1011 | 5.2  | 320 | 4.7 |
| 2020 | 3 | 4 | 9  | -0.4 | 141 | 361 | 282 | 1011 | 6.3  | 319 | 5.5 |

|      |   |   |    |      |     |     |     |      |      |     |     |
|------|---|---|----|------|-----|-----|-----|------|------|-----|-----|
| 2020 | 3 | 4 | 10 | -0.8 | 127 | 787 | 561 | 1011 | 7.3  | 317 | 6   |
| 2020 | 3 | 4 | 11 | -1.1 | 132 | 867 | 711 | 1011 | 7.9  | 314 | 6.4 |
| 2020 | 3 | 4 | 12 | -1.4 | 130 | 918 | 805 | 1010 | 8.2  | 313 | 6.9 |
| 2020 | 3 | 4 | 13 | -1.8 | 125 | 932 | 823 | 1010 | 8    | 311 | 7.3 |
| 2020 | 3 | 4 | 14 | -2.3 | 127 | 906 | 768 | 1009 | 7.2  | 309 | 7.6 |
| 2020 | 3 | 4 | 15 | -2.9 | 136 | 822 | 641 | 1009 | 6    | 311 | 7.9 |
| 2020 | 3 | 4 | 16 | -3.6 | 207 | 159 | 282 | 1009 | 4.5  | 313 | 7.7 |
| 2020 | 3 | 4 | 17 | -4   | 93  | 0   | 93  | 1010 | 2.7  | 314 | 7.1 |
| 2020 | 3 | 4 | 18 | -4.1 | 20  | 0   | 20  | 1011 | 1.1  | 315 | 6.2 |
| 2020 | 3 | 4 | 19 | -4.2 | 0   | 0   | 0   | 1011 | 0.5  | 317 | 6.1 |
| 2020 | 3 | 4 | 20 | -4.4 | 0   | 0   | 0   | 1012 | 0.3  | 318 | 6.1 |
| 2020 | 3 | 4 | 21 | -4.4 | 0   | 0   | 0   | 1012 | 0.1  | 321 | 5.8 |
| 2020 | 3 | 4 | 22 | -4.3 | 0   | 0   | 0   | 1012 | 0    | 323 | 5.4 |
| 2020 | 3 | 4 | 23 | -4   | 0   | 0   | 0   | 1012 | 0    | 326 | 4.8 |
| 2020 | 3 | 5 | 0  | -3.6 | 0   | 0   | 0   | 1012 | -0.1 | 328 | 4.6 |
| 2020 | 3 | 5 | 1  | -3.3 | 0   | 0   | 0   | 1012 | -0.3 | 332 | 4   |
| 2020 | 3 | 5 | 2  | -3.2 | 0   | 0   | 0   | 1012 | -1.1 | 338 | 3.1 |
| 2020 | 3 | 5 | 3  | -3.3 | 0   | 0   | 0   | 1012 | -1.2 | 340 | 3.1 |
| 2020 | 3 | 5 | 4  | -3.3 | 0   | 0   | 0   | 1012 | -0.8 | 341 | 3.2 |
| 2020 | 3 | 5 | 5  | -3.4 | 0   | 0   | 0   | 1013 | -0.8 | 344 | 3   |
| 2020 | 3 | 5 | 6  | -4.1 | 0   | 0   | 0   | 1013 | -2.7 | 347 | 2   |
| 2020 | 3 | 5 | 7  | -3.8 | 0   | 0   | 0   | 1014 | -1.5 | 348 | 2.7 |
| 2020 | 3 | 5 | 8  | -4   | 65  | 525 | 173 | 1014 | 0.8  | 345 | 4   |
| 2020 | 3 | 5 | 9  | -4.2 | 93  | 758 | 393 | 1014 | 2.5  | 341 | 4.3 |
| 2020 | 3 | 5 | 10 | -4.3 | 106 | 866 | 586 | 1014 | 4.2  | 337 | 4.4 |
| 2020 | 3 | 5 | 11 | -4.4 | 110 | 932 | 737 | 1013 | 5.7  | 334 | 4.5 |
| 2020 | 3 | 5 | 12 | -4.3 | 121 | 946 | 822 | 1013 | 6.8  | 332 | 4.6 |
| 2020 | 3 | 5 | 13 | -4.2 | 118 | 958 | 840 | 1012 | 7.4  | 330 | 4.6 |
| 2020 | 3 | 5 | 14 | -4.2 | 112 | 950 | 788 | 1011 | 7.5  | 329 | 4.6 |
| 2020 | 3 | 5 | 15 | -4.4 | 108 | 906 | 667 | 1011 | 7    | 329 | 4.5 |
| 2020 | 3 | 5 | 16 | -4.5 | 95  | 844 | 497 | 1011 | 5.9  | 329 | 4.2 |
| 2020 | 3 | 5 | 17 | -3.7 | 74  | 699 | 284 | 1011 | 4    | 329 | 3.3 |
| 2020 | 3 | 5 | 18 | -2.7 | 35  | 360 | 71  | 1011 | 0.4  | 329 | 1.9 |
| 2020 | 3 | 5 | 19 | -3.3 | 0   | 0   | 0   | 1012 | -0.9 | 334 | 1.8 |
| 2020 | 3 | 5 | 20 | -3.9 | 0   | 0   | 0   | 1012 | -1.9 | 341 | 1.5 |
| 2020 | 3 | 5 | 21 | -4.5 | 0   | 0   | 0   | 1012 | -2.7 | 349 | 1.3 |
| 2020 | 3 | 5 | 22 | -4.8 | 0   | 0   | 0   | 1012 | -3.3 | 358 | 1.2 |
| 2020 | 3 | 5 | 23 | -5.1 | 0   | 0   | 0   | 1012 | -3.8 | 7   | 1.2 |
| 2020 | 3 | 6 | 0  | -5.3 | 0   | 0   | 0   | 1012 | -4   | 14  | 1.1 |
| 2020 | 3 | 6 | 1  | -5.4 | 0   | 0   | 0   | 1011 | -4   | 17  | 1.1 |
| 2020 | 3 | 6 | 2  | -5.6 | 0   | 0   | 0   | 1011 | -4   | 18  | 1   |
| 2020 | 3 | 6 | 3  | -5.7 | 0   | 0   | 0   | 1011 | -4.1 | 18  | 1   |
| 2020 | 3 | 6 | 4  | -5.9 | 0   | 0   | 0   | 1011 | -4.2 | 14  | 1   |
| 2020 | 3 | 6 | 5  | -6.1 | 0   | 0   | 0   | 1011 | -4.3 | 6   | 0.9 |
| 2020 | 3 | 6 | 6  | -6.3 | 0   | 0   | 0   | 1011 | -4.4 | 4   | 1   |
| 2020 | 3 | 6 | 7  | -5.5 | 0   | 0   | 0   | 1012 | -2.6 | 5   | 1.4 |
| 2020 | 3 | 6 | 8  | -5.5 | 57  | 615 | 187 | 1012 | 0.3  | 3   | 1.6 |
| 2020 | 3 | 6 | 9  | -5.3 | 84  | 811 | 409 | 1012 | 3    | 359 | 1.2 |
| 2020 | 3 | 6 | 10 | -5   | 101 | 909 | 609 | 1011 | 5.2  | 3   | 0.8 |
| 2020 | 3 | 6 | 11 | -4.8 | 111 | 957 | 760 | 1010 | 7.4  | 347 | 0.2 |

|      |   |   |    |      |     |     |     |      |      |     |     |
|------|---|---|----|------|-----|-----|-----|------|------|-----|-----|
| 2020 | 3 | 6 | 12 | -4.5 | 114 | 986 | 849 | 1009 | 9.2  | 232 | 0.6 |
| 2020 | 3 | 6 | 13 | -4.3 | 115 | 975 | 854 | 1008 | 10.7 | 236 | 1   |
| 2020 | 3 | 6 | 14 | -4.3 | 118 | 950 | 798 | 1007 | 11   | 229 | 1.2 |
| 2020 | 3 | 6 | 15 | -3.5 | 108 | 904 | 670 | 1007 | 11.2 | 227 | 1.5 |
| 2020 | 3 | 6 | 16 | -2.8 | 94  | 836 | 495 | 1007 | 10.5 | 224 | 1.5 |
| 2020 | 3 | 6 | 17 | 1.2  | 75  | 670 | 278 | 1007 | 8.1  | 233 | 0.9 |
| 2020 | 3 | 6 | 18 | -1.5 | 38  | 292 | 68  | 1007 | 4.7  | 251 | 1.1 |
| 2020 | 3 | 6 | 19 | -2.1 | 0   | 0   | 0   | 1008 | 4.2  | 264 | 0.9 |
| 2020 | 3 | 6 | 20 | -2.4 | 0   | 0   | 0   | 1008 | 4    | 269 | 0.7 |
| 2020 | 3 | 6 | 21 | -2.9 | 0   | 0   | 0   | 1008 | 4.4  | 264 | 0.3 |
| 2020 | 3 | 6 | 22 | -3   | 0   | 0   | 0   | 1007 | 4.2  | 130 | 0.5 |
| 2020 | 3 | 6 | 23 | -2.1 | 0   | 0   | 0   | 1007 | 3.5  | 154 | 0.9 |
| 2020 | 3 | 7 | 0  | -1.7 | 0   | 0   | 0   | 1007 | 2.6  | 156 | 1.1 |
| 2020 | 3 | 7 | 1  | -0.6 | 0   | 0   | 0   | 1006 | 2.2  | 149 | 1.1 |
| 2020 | 3 | 7 | 2  | 0.1  | 0   | 0   | 0   | 1006 | 2.1  | 144 | 1.2 |
| 2020 | 3 | 7 | 3  | 0.6  | 0   | 0   | 0   | 1006 | 2.1  | 134 | 1.3 |
| 2020 | 3 | 7 | 4  | 1.1  | 0   | 0   | 0   | 1005 | 2.3  | 130 | 1.3 |
| 2020 | 3 | 7 | 5  | 1.5  | 0   | 0   | 0   | 1005 | 2.9  | 132 | 1.2 |
| 2020 | 3 | 7 | 6  | 2.1  | 0   | 0   | 0   | 1005 | 3.6  | 132 | 1.2 |
| 2020 | 3 | 7 | 7  | 3.2  | 0   | 0   | 0   | 1005 | 4.7  | 131 | 1.2 |
| 2020 | 3 | 7 | 8  | 4.1  | 46  | 0   | 46  | 1005 | 6.4  | 123 | 1.6 |
| 2020 | 3 | 7 | 9  | 4.6  | 58  | 0   | 58  | 1005 | 7.3  | 120 | 1.6 |
| 2020 | 3 | 7 | 10 | 5.6  | 129 | 0   | 129 | 1005 | 9    | 127 | 1.8 |
| 2020 | 3 | 7 | 11 | 6.2  | 165 | 1   | 166 | 1004 | 10.6 | 145 | 2   |
| 2020 | 3 | 7 | 12 | 6.5  | 174 | 3   | 177 | 1004 | 11.3 | 158 | 2   |
| 2020 | 3 | 7 | 13 | 6.7  | 70  | 0   | 70  | 1003 | 11.1 | 162 | 1.8 |
| 2020 | 3 | 7 | 14 | 6.8  | 78  | 0   | 78  | 1002 | 10.9 | 169 | 1.4 |
| 2020 | 3 | 7 | 15 | 6.8  | 34  | 0   | 34  | 1002 | 10.6 | 190 | 0.7 |
| 2020 | 3 | 7 | 16 | 6.8  | 38  | 0   | 38  | 1002 | 10.1 | 298 | 0.6 |
| 2020 | 3 | 7 | 17 | 7.3  | 105 | 0   | 105 | 1003 | 9    | 326 | 1.2 |
| 2020 | 3 | 7 | 18 | 6.6  | 5   | 0   | 5   | 1004 | 7.4  | 340 | 1.2 |
| 2020 | 3 | 7 | 19 | 5.6  | 0   | 0   | 0   | 1004 | 6.2  | 5   | 1.1 |
| 2020 | 3 | 7 | 20 | 4.5  | 0   | 0   | 0   | 1004 | 4.5  | 14  | 1.2 |
| 2020 | 3 | 7 | 21 | 3.5  | 0   | 0   | 0   | 1004 | 3.5  | 17  | 1.2 |
| 2020 | 3 | 7 | 22 | 2.7  | 0   | 0   | 0   | 1005 | 2.7  | 16  | 1.2 |
| 2020 | 3 | 7 | 23 | 1.9  | 0   | 0   | 0   | 1005 | 1.9  | 15  | 1.2 |
| 2020 | 3 | 8 | 0  | 1.4  | 0   | 0   | 0   | 1005 | 1.4  | 13  | 1.2 |
| 2020 | 3 | 8 | 1  | 0.8  | 0   | 0   | 0   | 1005 | 0.8  | 12  | 1.3 |
| 2020 | 3 | 8 | 2  | 0.2  | 0   | 0   | 0   | 1005 | 0.2  | 13  | 1.3 |
| 2020 | 3 | 8 | 3  | -0.3 | 0   | 0   | 0   | 1005 | -0.3 | 15  | 1.3 |
| 2020 | 3 | 8 | 4  | -0.6 | 0   | 0   | 0   | 1005 | -0.6 | 20  | 1.4 |
| 2020 | 3 | 8 | 5  | -0.9 | 0   | 0   | 0   | 1006 | -0.9 | 33  | 1.4 |
| 2020 | 3 | 8 | 6  | -1.1 | 0   | 0   | 0   | 1006 | -1.1 | 44  | 1.5 |
| 2020 | 3 | 8 | 7  | 0.7  | 6   | 8   | 7   | 1006 | 1.5  | 51  | 1.6 |
| 2020 | 3 | 8 | 8  | 2.1  | 81  | 393 | 168 | 1007 | 4.9  | 54  | 2.5 |
| 2020 | 3 | 8 | 9  | 2.6  | 123 | 624 | 379 | 1007 | 8.3  | 62  | 2.7 |
| 2020 | 3 | 8 | 10 | 2.1  | 146 | 746 | 571 | 1006 | 11.3 | 74  | 2.9 |
| 2020 | 3 | 8 | 11 | 2.5  | 159 | 812 | 717 | 1006 | 13.1 | 86  | 2.6 |
| 2020 | 3 | 8 | 12 | 3.2  | 154 | 867 | 808 | 1006 | 14.5 | 102 | 2.2 |
| 2020 | 3 | 8 | 13 | 3.8  | 155 | 866 | 820 | 1005 | 15.4 | 121 | 2   |



|      |   |    |    |     |     |     |     |      |      |     |     |
|------|---|----|----|-----|-----|-----|-----|------|------|-----|-----|
| 2020 | 3 | 8  | 14 | 4.1 | 150 | 850 | 766 | 1004 | 15.7 | 138 | 1.9 |
| 2020 | 3 | 8  | 15 | 4.3 | 140 | 806 | 647 | 1004 | 15.5 | 149 | 1.8 |
| 2020 | 3 | 8  | 16 | 4.8 | 124 | 711 | 471 | 1004 | 14.8 | 155 | 1.6 |
| 2020 | 3 | 8  | 17 | 7.9 | 97  | 540 | 264 | 1004 | 12.5 | 171 | 0.9 |
| 2020 | 3 | 8  | 18 | 5.1 | 43  | 198 | 64  | 1005 | 9.2  | 198 | 1   |
| 2020 | 3 | 8  | 19 | 4.2 | 0   | 0   | 0   | 1005 | 8.1  | 207 | 1   |
| 2020 | 3 | 8  | 20 | 3.6 | 0   | 0   | 0   | 1006 | 7.7  | 212 | 1   |
| 2020 | 3 | 8  | 21 | 3   | 0   | 0   | 0   | 1006 | 7.5  | 207 | 0.7 |
| 2020 | 3 | 8  | 22 | 2.8 | 0   | 0   | 0   | 1006 | 7.6  | 152 | 0.5 |
| 2020 | 3 | 8  | 23 | 2.9 | 0   | 0   | 0   | 1005 | 6.4  | 112 | 0.9 |
| 2020 | 3 | 9  | 0  | 3.2 | 0   | 0   | 0   | 1005 | 5.1  | 111 | 1.2 |
| 2020 | 3 | 9  | 1  | 3.8 | 0   | 0   | 0   | 1005 | 4    | 110 | 1.3 |
| 2020 | 3 | 9  | 2  | 3.4 | 0   | 0   | 0   | 1005 | 3.4  | 109 | 1.3 |
| 2020 | 3 | 9  | 3  | 2.8 | 0   | 0   | 0   | 1004 | 2.8  | 105 | 1.3 |
| 2020 | 3 | 9  | 4  | 2.5 | 0   | 0   | 0   | 1004 | 2.5  | 98  | 1.4 |
| 2020 | 3 | 9  | 5  | 2.6 | 0   | 0   | 0   | 1003 | 2.6  | 96  | 1.6 |
| 2020 | 3 | 9  | 6  | 3   | 0   | 0   | 0   | 1003 | 3    | 96  | 1.9 |
| 2020 | 3 | 9  | 7  | 3.8 | 5   | 0   | 5   | 1003 | 4.4  | 96  | 2.4 |
| 2020 | 3 | 9  | 8  | 4.3 | 79  | 8   | 81  | 1003 | 5.9  | 95  | 3   |
| 2020 | 3 | 9  | 9  | 5   | 171 | 68  | 200 | 1003 | 7.1  | 90  | 2.9 |
| 2020 | 3 | 9  | 10 | 5.8 | 244 | 54  | 275 | 1003 | 8.7  | 88  | 2.9 |
| 2020 | 3 | 9  | 11 | 6.5 | 332 | 149 | 435 | 1003 | 9.8  | 86  | 2.7 |
| 2020 | 3 | 9  | 12 | 7.2 | 360 | 283 | 575 | 1002 | 10.6 | 86  | 2.8 |
| 2020 | 3 | 9  | 13 | 7.9 | 382 | 178 | 520 | 1001 | 11.3 | 89  | 2.7 |
| 2020 | 3 | 9  | 14 | 8.2 | 184 | 4   | 187 | 1000 | 11.7 | 91  | 2.6 |
| 2020 | 3 | 9  | 15 | 8.7 | 70  | 0   | 70  | 998  | 11.4 | 82  | 2.4 |
| 2020 | 3 | 9  | 16 | 9.2 | 56  | 0   | 56  | 998  | 10.7 | 76  | 1.8 |
| 2020 | 3 | 9  | 17 | 8.8 | 48  | 0   | 48  | 998  | 9.6  | 78  | 1.6 |
| 2020 | 3 | 9  | 18 | 8.4 | 12  | 0   | 12  | 998  | 8.8  | 69  | 1.7 |
| 2020 | 3 | 9  | 19 | 8.3 | 0   | 0   | 0   | 997  | 8.7  | 59  | 1.8 |
| 2020 | 3 | 9  | 20 | 8.2 | 0   | 0   | 0   | 997  | 8.5  | 55  | 1.9 |
| 2020 | 3 | 9  | 21 | 8.1 | 0   | 0   | 0   | 996  | 8.4  | 55  | 2.1 |
| 2020 | 3 | 9  | 22 | 8   | 0   | 0   | 0   | 996  | 8.3  | 58  | 2.1 |
| 2020 | 3 | 9  | 23 | 7.9 | 0   | 0   | 0   | 995  | 8.2  | 55  | 1.9 |
| 2020 | 3 | 10 | 0  | 7.7 | 0   | 0   | 0   | 994  | 7.8  | 44  | 1.7 |
| 2020 | 3 | 10 | 1  | 7.1 | 0   | 0   | 0   | 994  | 7.1  | 30  | 1.6 |
| 2020 | 3 | 10 | 2  | 6.7 | 0   | 0   | 0   | 993  | 6.7  | 17  | 1.6 |
| 2020 | 3 | 10 | 3  | 6.6 | 0   | 0   | 0   | 992  | 6.6  | 5   | 2.1 |
| 2020 | 3 | 10 | 4  | 6.4 | 0   | 0   | 0   | 992  | 6.7  | 352 | 3.1 |
| 2020 | 3 | 10 | 5  | 5.9 | 0   | 0   | 0   | 992  | 6.3  | 339 | 3.5 |
| 2020 | 3 | 10 | 6  | 5.5 | 0   | 0   | 0   | 992  | 5.9  | 331 | 3.9 |
| 2020 | 3 | 10 | 7  | 5.3 | 4   | 0   | 4   | 993  | 5.7  | 329 | 4.2 |
| 2020 | 3 | 10 | 8  | 5.4 | 31  | 0   | 31  | 993  | 6    | 329 | 4.6 |
| 2020 | 3 | 10 | 9  | 5.1 | 19  | 0   | 19  | 994  | 6    | 327 | 5.3 |
| 2020 | 3 | 10 | 10 | 5   | 127 | 0   | 127 | 994  | 6.2  | 325 | 5.9 |
| 2020 | 3 | 10 | 11 | 4.9 | 237 | 14  | 247 | 994  | 6.2  | 323 | 6.2 |
| 2020 | 3 | 10 | 12 | 4.9 | 303 | 573 | 741 | 994  | 6.5  | 323 | 6.3 |
| 2020 | 3 | 10 | 13 | 5   | 71  | 0   | 71  | 994  | 6.9  | 321 | 6.7 |
| 2020 | 3 | 10 | 14 | 4.8 | 121 | 0   | 121 | 995  | 7.2  | 317 | 7.2 |
| 2020 | 3 | 10 | 15 | 4.7 | 79  | 0   | 79  | 995  | 7.2  | 316 | 7.3 |

|      |   |    |    |      |     |     |     |      |      |     |     |
|------|---|----|----|------|-----|-----|-----|------|------|-----|-----|
| 2020 | 3 | 10 | 16 | 4.5  | 74  | 0   | 74  | 996  | 7.2  | 315 | 7.3 |
| 2020 | 3 | 10 | 17 | 4.2  | 40  | 0   | 40  | 997  | 6.7  | 315 | 6.9 |
| 2020 | 3 | 10 | 18 | 3.2  | 15  | 0   | 15  | 998  | 5.5  | 318 | 6.5 |
| 2020 | 3 | 10 | 19 | 1.6  | 0   | 0   | 0   | 999  | 4.2  | 321 | 6   |
| 2020 | 3 | 10 | 20 | 0.4  | 0   | 0   | 0   | 1000 | 3.3  | 323 | 5.3 |
| 2020 | 3 | 10 | 21 | -0.6 | 0   | 0   | 0   | 1000 | 2.6  | 322 | 4.9 |
| 2020 | 3 | 10 | 22 | -1   | 0   | 0   | 0   | 1001 | 2.2  | 320 | 4.5 |
| 2020 | 3 | 10 | 23 | -1.3 | 0   | 0   | 0   | 1001 | 2    | 316 | 4.2 |
| 2020 | 3 | 11 | 0  | -1.6 | 0   | 0   | 0   | 1001 | 2    | 314 | 4.2 |
| 2020 | 3 | 11 | 1  | -1.7 | 0   | 0   | 0   | 1002 | 1.8  | 313 | 4   |
| 2020 | 3 | 11 | 2  | -1.6 | 0   | 0   | 0   | 1002 | 1.7  | 314 | 4   |
| 2020 | 3 | 11 | 3  | -1.6 | 0   | 0   | 0   | 1003 | 1.5  | 315 | 4   |
| 2020 | 3 | 11 | 4  | -1.6 | 0   | 0   | 0   | 1003 | 1.3  | 316 | 4.1 |
| 2020 | 3 | 11 | 5  | -1.7 | 0   | 0   | 0   | 1004 | 1.1  | 318 | 4   |
| 2020 | 3 | 11 | 6  | -2   | 0   | 0   | 0   | 1004 | 0.5  | 323 | 3.5 |
| 2020 | 3 | 11 | 7  | -1.6 | 15  | 96  | 18  | 1005 | 1.9  | 326 | 3.8 |
| 2020 | 3 | 11 | 8  | -2   | 61  | 620 | 207 | 1005 | 4.1  | 327 | 5.2 |
| 2020 | 3 | 11 | 9  | -3   | 81  | 823 | 430 | 1006 | 5.7  | 326 | 5.9 |
| 2020 | 3 | 11 | 10 | -3.3 | 91  | 920 | 629 | 1006 | 7    | 324 | 6.2 |
| 2020 | 3 | 11 | 11 | -3.5 | 97  | 970 | 777 | 1006 | 8    | 324 | 6.5 |
| 2020 | 3 | 11 | 12 | -3.6 | 105 | 985 | 861 | 1006 | 8.6  | 323 | 6.7 |
| 2020 | 3 | 11 | 13 | -3.5 | 110 | 981 | 875 | 1006 | 8.7  | 323 | 6.8 |
| 2020 | 3 | 11 | 14 | -3.5 | 112 | 956 | 816 | 1006 | 8.5  | 323 | 6.7 |
| 2020 | 3 | 11 | 15 | -3.6 | 112 | 903 | 690 | 1006 | 7.9  | 321 | 6.4 |
| 2020 | 3 | 11 | 16 | -3.5 | 102 | 823 | 511 | 1007 | 7    | 321 | 5.8 |
| 2020 | 3 | 11 | 17 | -2.8 | 81  | 677 | 297 | 1008 | 5.4  | 324 | 4.3 |
| 2020 | 3 | 11 | 18 | -1.4 | 42  | 348 | 83  | 1008 | 2.1  | 324 | 2   |
| 2020 | 3 | 11 | 19 | -1.7 | 0   | 0   | 0   | 1009 | 0.6  | 322 | 1.4 |
| 2020 | 3 | 11 | 20 | -2.2 | 0   | 0   | 0   | 1010 | 0    | 321 | 1.3 |
| 2020 | 3 | 11 | 21 | -2.5 | 0   | 0   | 0   | 1010 | -0.1 | 322 | 1.2 |
| 2020 | 3 | 11 | 22 | -2.7 | 0   | 0   | 0   | 1010 | 0.1  | 329 | 1.1 |
| 2020 | 3 | 11 | 23 | -2.8 | 0   | 0   | 0   | 1010 | 0.1  | 332 | 1   |
| 2020 | 3 | 12 | 0  | -2.8 | 0   | 0   | 0   | 1010 | 0.1  | 319 | 0.9 |
| 2020 | 3 | 12 | 1  | -2.7 | 0   | 0   | 0   | 1010 | 0.3  | 331 | 0.8 |
| 2020 | 3 | 12 | 2  | -2.7 | 0   | 0   | 0   | 1010 | 0.2  | 358 | 0.7 |
| 2020 | 3 | 12 | 3  | -2.6 | 0   | 0   | 0   | 1010 | 0    | 9   | 0.6 |
| 2020 | 3 | 12 | 4  | -2.6 | 0   | 0   | 0   | 1010 | -0.1 | 13  | 0.3 |
| 2020 | 3 | 12 | 5  | -2.6 | 0   | 0   | 0   | 1010 | -0.2 | 80  | 0.3 |
| 2020 | 3 | 12 | 6  | -2.7 | 0   | 0   | 0   | 1010 | -0.7 | 101 | 0.5 |
| 2020 | 3 | 12 | 7  | -1.9 | 11  | 0   | 11  | 1011 | 0.4  | 119 | 0.8 |
| 2020 | 3 | 12 | 8  | -1.4 | 80  | 496 | 199 | 1011 | 2.7  | 124 | 1.6 |
| 2020 | 3 | 12 | 9  | -2.4 | 112 | 713 | 419 | 1011 | 6.4  | 148 | 1.8 |
| 2020 | 3 | 12 | 10 | -3.3 | 132 | 807 | 607 | 1011 | 9.6  | 167 | 2.5 |
| 2020 | 3 | 12 | 11 | -2   | 146 | 858 | 752 | 1010 | 11.3 | 174 | 2.8 |
| 2020 | 3 | 12 | 12 | -1.6 | 151 | 881 | 831 | 1010 | 13   | 184 | 3   |
| 2020 | 3 | 12 | 13 | -0.9 | 156 | 877 | 844 | 1009 | 13.8 | 192 | 3.3 |
| 2020 | 3 | 12 | 14 | -0.4 | 156 | 853 | 787 | 1008 | 13.8 | 193 | 3.6 |
| 2020 | 3 | 12 | 15 | 0.2  | 158 | 780 | 659 | 1008 | 13.3 | 192 | 3.6 |
| 2020 | 3 | 12 | 16 | 0.8  | 144 | 672 | 482 | 1008 | 12.2 | 193 | 3.3 |
| 2020 | 3 | 12 | 17 | 4    | 114 | 497 | 274 | 1008 | 9.8  | 197 | 1.7 |

|      |   |    |    |      |     |     |     |      |      |     |     |
|------|---|----|----|------|-----|-----|-----|------|------|-----|-----|
| 2020 | 3 | 12 | 18 | 3.4  | 51  | 178 | 73  | 1008 | 6.4  | 198 | 1.3 |
| 2020 | 3 | 12 | 19 | 2.9  | 0   | 0   | 0   | 1008 | 5.4  | 197 | 1.3 |
| 2020 | 3 | 12 | 20 | 2.8  | 0   | 0   | 0   | 1009 | 5.1  | 200 | 1.2 |
| 2020 | 3 | 12 | 21 | 2.7  | 0   | 0   | 0   | 1009 | 5.5  | 203 | 1.1 |
| 2020 | 3 | 12 | 22 | 2.7  | 0   | 0   | 0   | 1009 | 6    | 191 | 0.9 |
| 2020 | 3 | 12 | 23 | 2.8  | 0   | 0   | 0   | 1009 | 5.9  | 181 | 0.8 |
| 2020 | 3 | 13 | 0  | 2.9  | 0   | 0   | 0   | 1009 | 5.2  | 199 | 0.9 |
| 2020 | 3 | 13 | 1  | 3.2  | 0   | 0   | 0   | 1010 | 4.6  | 220 | 1.1 |
| 2020 | 3 | 13 | 2  | 3.4  | 0   | 0   | 0   | 1009 | 4.5  | 241 | 1   |
| 2020 | 3 | 13 | 3  | 3.5  | 0   | 0   | 0   | 1009 | 4.6  | 276 | 0.9 |
| 2020 | 3 | 13 | 4  | 3.6  | 0   | 0   | 0   | 1008 | 4.5  | 305 | 0.9 |
| 2020 | 3 | 13 | 5  | 3.6  | 0   | 0   | 0   | 1009 | 3.7  | 311 | 1.1 |
| 2020 | 3 | 13 | 6  | 2.9  | 0   | 0   | 0   | 1009 | 2.9  | 316 | 1.1 |
| 2020 | 3 | 13 | 7  | 4.5  | 4   | 0   | 4   | 1009 | 4.6  | 334 | 1.3 |
| 2020 | 3 | 13 | 8  | 5.4  | 21  | 0   | 21  | 1010 | 6.9  | 340 | 3.1 |
| 2020 | 3 | 13 | 9  | 5    | 206 | 367 | 365 | 1010 | 8.2  | 351 | 4   |
| 2020 | 3 | 13 | 10 | 4.2  | 244 | 523 | 554 | 1010 | 10   | 355 | 4.4 |
| 2020 | 3 | 13 | 11 | 3.4  | 261 | 608 | 692 | 1009 | 11.7 | 347 | 4.6 |
| 2020 | 3 | 13 | 12 | 2.2  | 215 | 752 | 799 | 1009 | 12.5 | 345 | 4.8 |
| 2020 | 3 | 13 | 13 | 1.1  | 221 | 748 | 811 | 1008 | 12.7 | 344 | 4.7 |
| 2020 | 3 | 13 | 14 | 0.1  | 231 | 698 | 750 | 1007 | 12.4 | 338 | 4.8 |
| 2020 | 3 | 13 | 15 | -1.4 | 247 | 581 | 623 | 1007 | 11.2 | 337 | 5   |
| 2020 | 3 | 13 | 16 | -3.1 | 223 | 456 | 453 | 1007 | 9.2  | 336 | 4.9 |
| 2020 | 3 | 13 | 17 | -3.2 | 166 | 259 | 250 | 1007 | 6.6  | 336 | 4.4 |
| 2020 | 3 | 13 | 18 | -2.4 | 51  | 61  | 58  | 1007 | 4.4  | 336 | 4   |
| 2020 | 3 | 13 | 19 | -2   | 0   | 0   | 0   | 1007 | 3.3  | 340 | 4.1 |
| 2020 | 3 | 13 | 20 | -2   | 0   | 0   | 0   | 1007 | 2.6  | 342 | 4.2 |
| 2020 | 3 | 13 | 21 | -2   | 0   | 0   | 0   | 1008 | 2    | 341 | 4.1 |
| 2020 | 3 | 13 | 22 | -2   | 0   | 0   | 0   | 1008 | 1.5  | 339 | 3.9 |
| 2020 | 3 | 13 | 23 | -2.1 | 0   | 0   | 0   | 1008 | 1.2  | 338 | 3.9 |
| 2020 | 3 | 14 | 0  | -2.2 | 0   | 0   | 0   | 1008 | 0.9  | 338 | 3.9 |
| 2020 | 3 | 14 | 1  | -2.4 | 0   | 0   | 0   | 1007 | 0.6  | 339 | 3.9 |
| 2020 | 3 | 14 | 2  | -2.7 | 0   | 0   | 0   | 1007 | 0.1  | 339 | 3.7 |
| 2020 | 3 | 14 | 3  | -3.2 | 0   | 0   | 0   | 1006 | -0.9 | 340 | 3.2 |
| 2020 | 3 | 14 | 4  | -3.9 | 0   | 0   | 0   | 1006 | -1.9 | 343 | 2.8 |
| 2020 | 3 | 14 | 5  | -4.2 | 0   | 0   | 0   | 1006 | -2.5 | 346 | 2.6 |
| 2020 | 3 | 14 | 6  | -4.5 | 0   | 0   | 0   | 1006 | -3   | 346 | 2.2 |
| 2020 | 3 | 14 | 7  | -3.8 | 18  | 104 | 22  | 1006 | -0.8 | 345 | 3.1 |
| 2020 | 3 | 14 | 8  | -3.9 | 66  | 604 | 217 | 1006 | 2.2  | 340 | 4.4 |
| 2020 | 3 | 14 | 9  | -4.4 | 85  | 812 | 442 | 1006 | 4.6  | 337 | 5.2 |
| 2020 | 3 | 14 | 10 | -4.6 | 95  | 911 | 641 | 1006 | 6.3  | 333 | 5.4 |
| 2020 | 3 | 14 | 11 | -4.3 | 100 | 963 | 789 | 1005 | 7.6  | 330 | 5.6 |
| 2020 | 3 | 14 | 12 | -4   | 105 | 984 | 873 | 1004 | 8.6  | 325 | 5.6 |
| 2020 | 3 | 14 | 13 | -3.8 | 107 | 977 | 881 | 1003 | 9.1  | 317 | 5.5 |
| 2020 | 3 | 14 | 14 | -3.8 | 107 | 958 | 823 | 1003 | 9.1  | 309 | 5.4 |
| 2020 | 3 | 14 | 15 | -4.2 | 113 | 895 | 695 | 1003 | 8.7  | 300 | 5.2 |
| 2020 | 3 | 14 | 16 | -4.1 | 108 | 798 | 514 | 1002 | 7.9  | 292 | 4.8 |
| 2020 | 3 | 14 | 17 | -2.2 | 94  | 612 | 295 | 1002 | 6.3  | 282 | 3.6 |
| 2020 | 3 | 14 | 18 | -0.2 | 49  | 249 | 81  | 1002 | 3    | 271 | 2   |
| 2020 | 3 | 14 | 19 | 0.4  | 0   | 0   | 0   | 1003 | 2.1  | 263 | 1.9 |

|      |   |    |    |      |     |     |     |      |      |     |     |
|------|---|----|----|------|-----|-----|-----|------|------|-----|-----|
| 2020 | 3 | 14 | 20 | 1.3  | 0   | 0   | 0   | 1003 | 1.8  | 257 | 1.9 |
| 2020 | 3 | 14 | 21 | 1.8  | 0   | 0   | 0   | 1003 | 1.8  | 257 | 2.1 |
| 2020 | 3 | 14 | 22 | 2.1  | 0   | 0   | 0   | 1003 | 2.1  | 262 | 2.4 |
| 2020 | 3 | 14 | 23 | 3.2  | 0   | 0   | 0   | 1002 | 3.2  | 269 | 3   |
| 2020 | 3 | 15 | 0  | 2.9  | 0   | 0   | 0   | 1002 | 2.9  | 273 | 2.7 |
| 2020 | 3 | 15 | 1  | 2.5  | 0   | 0   | 0   | 1002 | 2.5  | 278 | 2.6 |
| 2020 | 3 | 15 | 2  | 1.8  | 0   | 0   | 0   | 1001 | 1.8  | 283 | 2.4 |
| 2020 | 3 | 15 | 3  | 1.3  | 0   | 0   | 0   | 1001 | 1.3  | 286 | 2.3 |
| 2020 | 3 | 15 | 4  | 1    | 0   | 0   | 0   | 1001 | 1    | 284 | 2.1 |
| 2020 | 3 | 15 | 5  | 0.8  | 0   | 0   | 0   | 1001 | 0.8  | 279 | 2   |
| 2020 | 3 | 15 | 6  | 0.9  | 0   | 0   | 0   | 1001 | 0.9  | 270 | 1.9 |
| 2020 | 3 | 15 | 7  | 3.6  | 20  | 95  | 25  | 1001 | 3.6  | 260 | 2.3 |
| 2020 | 3 | 15 | 8  | 4.1  | 77  | 526 | 211 | 1001 | 7.2  | 254 | 3.9 |
| 2020 | 3 | 15 | 9  | 1    | 104 | 724 | 427 | 1000 | 9.7  | 265 | 5.5 |
| 2020 | 3 | 15 | 10 | -0.4 | 131 | 797 | 612 | 1000 | 11.2 | 275 | 6.7 |
| 2020 | 3 | 15 | 11 | 0.1  | 151 | 836 | 753 | 1000 | 11.9 | 286 | 7.5 |
| 2020 | 3 | 15 | 12 | 0.9  | 165 | 851 | 833 | 1000 | 11.9 | 298 | 7.4 |
| 2020 | 3 | 15 | 13 | 0.1  | 140 | 903 | 859 | 999  | 11.6 | 307 | 7.3 |
| 2020 | 3 | 15 | 14 | -1.4 | 119 | 924 | 814 | 999  | 11   | 310 | 7.6 |
| 2020 | 3 | 15 | 15 | -2   | 294 | 289 | 483 | 999  | 9.5  | 313 | 7.9 |
| 2020 | 3 | 15 | 16 | -1.8 | 189 | 409 | 399 | 1000 | 7.5  | 314 | 7.7 |
| 2020 | 3 | 15 | 17 | -1.7 | 101 | 577 | 293 | 1000 | 5.8  | 314 | 7.1 |
| 2020 | 3 | 15 | 18 | -2   | 51  | 261 | 85  | 1001 | 3.9  | 313 | 6.1 |
| 2020 | 3 | 15 | 19 | -2.4 | 0   | 0   | 0   | 1002 | 3    | 315 | 6.1 |
| 2020 | 3 | 15 | 20 | -3.8 | 0   | 0   | 0   | 1003 | 2.7  | 319 | 7.1 |
| 2020 | 3 | 15 | 21 | -5.2 | 0   | 0   | 0   | 1004 | 2    | 323 | 7.2 |
| 2020 | 3 | 15 | 22 | -5.9 | 0   | 0   | 0   | 1004 | 1.5  | 325 | 6.7 |
| 2020 | 3 | 15 | 23 | -5.9 | 0   | 0   | 0   | 1005 | 1    | 327 | 6   |
| 2020 | 3 | 16 | 0  | -5.4 | 0   | 0   | 0   | 1006 | 0.2  | 330 | 5.3 |
| 2020 | 3 | 16 | 1  | -4.9 | 0   | 0   | 0   | 1007 | -0.6 | 333 | 4.4 |
| 2020 | 3 | 16 | 2  | -4.5 | 0   | 0   | 0   | 1007 | -1.4 | 336 | 3.5 |
| 2020 | 3 | 16 | 3  | -4.4 | 0   | 0   | 0   | 1008 | -2.1 | 342 | 2.9 |
| 2020 | 3 | 16 | 4  | -4.4 | 0   | 0   | 0   | 1008 | -2.8 | 350 | 2.4 |
| 2020 | 3 | 16 | 5  | -4.3 | 0   | 0   | 0   | 1009 | -3.5 | 358 | 2.1 |
| 2020 | 3 | 16 | 6  | -4.4 | 0   | 0   | 0   | 1010 | -3.9 | 4   | 1.7 |
| 2020 | 3 | 16 | 7  | -3.9 | 22  | 163 | 31  | 1011 | -1.5 | 6   | 2.4 |
| 2020 | 3 | 16 | 8  | -4.1 | 71  | 605 | 228 | 1011 | 1.5  | 16  | 2.7 |
| 2020 | 3 | 16 | 9  | -4.3 | 95  | 792 | 452 | 1011 | 4.2  | 26  | 2.1 |
| 2020 | 3 | 16 | 10 | -4.7 | 109 | 886 | 648 | 1011 | 6.5  | 31  | 0.9 |
| 2020 | 3 | 16 | 11 | -4.5 | 118 | 935 | 795 | 1011 | 8.2  | 269 | 0.1 |
| 2020 | 3 | 16 | 12 | -3.8 | 122 | 949 | 871 | 1011 | 9.4  | 249 | 1.1 |
| 2020 | 3 | 16 | 13 | -3.1 | 127 | 945 | 884 | 1010 | 10.1 | 261 | 1.8 |
| 2020 | 3 | 16 | 14 | -2.7 | 176 | 755 | 747 | 1009 | 10.6 | 267 | 2.1 |
| 2020 | 3 | 16 | 15 | -2.4 | 124 | 868 | 695 | 1009 | 10.4 | 261 | 2.6 |
| 2020 | 3 | 16 | 16 | -2.3 | 107 | 703 | 469 | 1009 | 9.6  | 257 | 3.3 |
| 2020 | 3 | 16 | 17 | -1.2 | 134 | 178 | 194 | 1009 | 7.7  | 258 | 3   |
| 2020 | 3 | 16 | 18 | 0.6  | 45  | 6   | 46  | 1010 | 4.6  | 265 | 1.8 |
| 2020 | 3 | 16 | 19 | 0.2  | 0   | 0   | 0   | 1010 | 3.1  | 266 | 1.6 |
| 2020 | 3 | 16 | 20 | -0.1 | 0   | 0   | 0   | 1010 | 2.2  | 260 | 1.3 |
| 2020 | 3 | 16 | 21 | -0.6 | 0   | 0   | 0   | 1010 | 1.4  | 253 | 1.1 |

|      |   |    |    |      |     |     |     |      |      |     |     |
|------|---|----|----|------|-----|-----|-----|------|------|-----|-----|
| 2020 | 3 | 16 | 22 | -0.8 | 0   | 0   | 0   | 1010 | 1.1  | 243 | 1   |
| 2020 | 3 | 16 | 23 | -0.7 | 0   | 0   | 0   | 1009 | 1.2  | 233 | 1   |
| 2020 | 3 | 17 | 0  | -0.4 | 0   | 0   | 0   | 1009 | 1.3  | 228 | 1.1 |
| 2020 | 3 | 17 | 1  | -0.3 | 0   | 0   | 0   | 1008 | 1.4  | 227 | 1.1 |
| 2020 | 3 | 17 | 2  | 0    | 0   | 0   | 0   | 1008 | 1.5  | 229 | 1.1 |
| 2020 | 3 | 17 | 3  | 0.3  | 0   | 0   | 0   | 1007 | 1.7  | 232 | 1.2 |
| 2020 | 3 | 17 | 4  | 0.6  | 0   | 0   | 0   | 1007 | 1.8  | 235 | 1.2 |
| 2020 | 3 | 17 | 5  | 1    | 0   | 0   | 0   | 1006 | 1.7  | 236 | 1.2 |
| 2020 | 3 | 17 | 6  | 1.2  | 0   | 0   | 0   | 1006 | 1.2  | 229 | 1.3 |
| 2020 | 3 | 17 | 7  | 2.7  | 20  | 72  | 24  | 1006 | 3.9  | 217 | 1.3 |
| 2020 | 3 | 17 | 8  | 3.4  | 100 | 200 | 153 | 1006 | 7.6  | 218 | 3   |
| 2020 | 3 | 17 | 9  | 4    | 131 | 634 | 419 | 1006 | 10.1 | 230 | 4.1 |
| 2020 | 3 | 17 | 10 | 4.6  | 157 | 728 | 603 | 1006 | 12.1 | 235 | 4.8 |
| 2020 | 3 | 17 | 11 | 4.9  | 177 | 779 | 744 | 1005 | 13.9 | 240 | 5.3 |
| 2020 | 3 | 17 | 12 | 5.2  | 197 | 783 | 819 | 1004 | 15.2 | 245 | 5.9 |
| 2020 | 3 | 17 | 13 | 5.1  | 205 | 776 | 829 | 1003 | 15.6 | 247 | 6.4 |
| 2020 | 3 | 17 | 14 | 4.9  | 202 | 750 | 771 | 1003 | 15.4 | 250 | 6.5 |
| 2020 | 3 | 17 | 15 | 4.6  | 194 | 687 | 649 | 1002 | 14.8 | 254 | 6.3 |
| 2020 | 3 | 17 | 16 | 4.8  | 179 | 571 | 475 | 1002 | 13.6 | 257 | 5.6 |
| 2020 | 3 | 17 | 17 | 5.8  | 139 | 384 | 269 | 1003 | 11.7 | 259 | 3.9 |
| 2020 | 3 | 17 | 18 | 6.5  | 54  | 119 | 70  | 1003 | 8.2  | 258 | 2.1 |
| 2020 | 3 | 17 | 19 | 6.6  | 0   | 0   | 0   | 1003 | 6.6  | 258 | 1.8 |
| 2020 | 3 | 17 | 20 | 5.6  | 0   | 0   | 0   | 1004 | 5.6  | 263 | 1.6 |
| 2020 | 3 | 17 | 21 | 5.7  | 0   | 0   | 0   | 1004 | 5.7  | 273 | 1.5 |
| 2020 | 3 | 17 | 22 | 6.4  | 0   | 0   | 0   | 1004 | 6.4  | 286 | 1.8 |
| 2020 | 3 | 17 | 23 | 6.3  | 0   | 0   | 0   | 1004 | 6.5  | 301 | 2   |
| 2020 | 3 | 18 | 0  | 5.8  | 0   | 0   | 0   | 1004 | 6    | 321 | 1.6 |
| 2020 | 3 | 18 | 1  | 5.2  | 0   | 0   | 0   | 1004 | 5.5  | 347 | 1.3 |
| 2020 | 3 | 18 | 2  | 4.4  | 0   | 0   | 0   | 1004 | 4.8  | 17  | 0.9 |
| 2020 | 3 | 18 | 3  | 3.4  | 0   | 0   | 0   | 1004 | 4    | 53  | 0.6 |
| 2020 | 3 | 18 | 4  | 2.5  | 0   | 0   | 0   | 1004 | 2.9  | 69  | 0.5 |
| 2020 | 3 | 18 | 5  | 1.5  | 0   | 0   | 0   | 1004 | 1.8  | 94  | 0.5 |
| 2020 | 3 | 18 | 6  | 0.4  | 0   | 0   | 0   | 1004 | 1.3  | 101 | 0.7 |
| 2020 | 3 | 18 | 7  | 0.6  | 25  | 160 | 35  | 1004 | 3.6  | 100 | 1   |
| 2020 | 3 | 18 | 8  | 0.5  | 76  | 582 | 233 | 1005 | 6.8  | 104 | 1.4 |
| 2020 | 3 | 18 | 9  | 1.5  | 102 | 768 | 455 | 1004 | 10.7 | 121 | 1.3 |
| 2020 | 3 | 18 | 10 | -0.5 | 117 | 862 | 649 | 1004 | 14   | 168 | 1   |
| 2020 | 3 | 18 | 11 | 0.2  | 125 | 905 | 788 | 1004 | 15.4 | 199 | 1.5 |
| 2020 | 3 | 18 | 12 | 1.1  | 124 | 939 | 873 | 1003 | 16.5 | 207 | 2   |
| 2020 | 3 | 18 | 13 | 1.8  | 125 | 934 | 880 | 1002 | 17.2 | 210 | 2.5 |
| 2020 | 3 | 18 | 14 | 2.4  | 127 | 909 | 820 | 1001 | 17.4 | 207 | 3   |
| 2020 | 3 | 18 | 15 | 3.1  | 129 | 841 | 688 | 1000 | 17.2 | 202 | 3.3 |
| 2020 | 3 | 18 | 16 | 4    | 128 | 723 | 505 | 1000 | 16.3 | 195 | 3.5 |
| 2020 | 3 | 18 | 17 | 7.1  | 117 | 494 | 285 | 1000 | 13.9 | 185 | 2.5 |
| 2020 | 3 | 18 | 18 | 7.1  | 55  | 168 | 79  | 1000 | 10.1 | 176 | 1.9 |
| 2020 | 3 | 18 | 19 | 6.8  | 0   | 0   | 0   | 1000 | 8.9  | 170 | 2.1 |
| 2020 | 3 | 18 | 20 | 7.2  | 0   | 0   | 0   | 1000 | 8.4  | 169 | 2.2 |
| 2020 | 3 | 18 | 21 | 7.8  | 0   | 0   | 0   | 1000 | 8.1  | 171 | 2.3 |
| 2020 | 3 | 18 | 22 | 8    | 0   | 0   | 0   | 999  | 8    | 177 | 2.4 |
| 2020 | 3 | 18 | 23 | 7.9  | 0   | 0   | 0   | 999  | 7.9  | 184 | 2.6 |

|      |   |    |    |      |     |     |     |      |      |     |     |
|------|---|----|----|------|-----|-----|-----|------|------|-----|-----|
| 2020 | 3 | 19 | 0  | 8.1  | 0   | 0   | 0   | 999  | 8.1  | 188 | 2.8 |
| 2020 | 3 | 19 | 1  | 8.4  | 0   | 0   | 0   | 998  | 8.4  | 190 | 3.2 |
| 2020 | 3 | 19 | 2  | 8.6  | 0   | 0   | 0   | 997  | 8.6  | 191 | 3.5 |
| 2020 | 3 | 19 | 3  | 8.9  | 0   | 0   | 0   | 997  | 8.9  | 192 | 3.9 |
| 2020 | 3 | 19 | 4  | 9    | 0   | 0   | 0   | 996  | 9    | 192 | 4.2 |
| 2020 | 3 | 19 | 5  | 9.1  | 0   | 0   | 0   | 995  | 9.1  | 192 | 4.3 |
| 2020 | 3 | 19 | 6  | 9.1  | 0   | 0   | 0   | 995  | 9.1  | 195 | 4.4 |
| 2020 | 3 | 19 | 7  | 10   | 22  | 42  | 25  | 995  | 10.5 | 202 | 4.9 |
| 2020 | 3 | 19 | 8  | 11.1 | 106 | 176 | 154 | 995  | 12.6 | 225 | 6.5 |
| 2020 | 3 | 19 | 9  | 10   | 196 | 225 | 301 | 996  | 13.1 | 257 | 8.1 |
| 2020 | 3 | 19 | 10 | 6.8  | 115 | 0   | 115 | 997  | 12.6 | 281 | 7.1 |
| 2020 | 3 | 19 | 11 | 4.7  | 167 | 813 | 766 | 997  | 12.8 | 296 | 7.3 |
| 2020 | 3 | 19 | 12 | 2.6  | 143 | 918 | 879 | 997  | 12.5 | 299 | 7.9 |
| 2020 | 3 | 19 | 13 | 1.1  | 131 | 944 | 897 | 997  | 11.8 | 300 | 8.4 |
| 2020 | 3 | 19 | 14 | 0.2  | 122 | 938 | 841 | 998  | 10.7 | 303 | 8.8 |
| 2020 | 3 | 19 | 15 | -1.1 | 112 | 908 | 719 | 998  | 9.7  | 305 | 9   |
| 2020 | 3 | 19 | 16 | -1.7 | 103 | 828 | 537 | 998  | 8.8  | 305 | 8.9 |
| 2020 | 3 | 19 | 17 | -1.5 | 85  | 682 | 320 | 999  | 7.8  | 304 | 8.1 |
| 2020 | 3 | 19 | 18 | -0.9 | 47  | 409 | 105 | 999  | 6.2  | 304 | 6.5 |
| 2020 | 3 | 19 | 19 | -0.7 | 0   | 0   | 0   | 1000 | 5.1  | 303 | 5.4 |
| 2020 | 3 | 19 | 20 | -0.4 | 0   | 0   | 0   | 1001 | 4.3  | 300 | 4.5 |
| 2020 | 3 | 19 | 21 | -0.1 | 0   | 0   | 0   | 1002 | 4    | 298 | 4.3 |
| 2020 | 3 | 19 | 22 | 0.2  | 0   | 0   | 0   | 1002 | 3.7  | 296 | 4   |
| 2020 | 3 | 19 | 23 | 0.6  | 0   | 0   | 0   | 1003 | 3.2  | 295 | 3.5 |
| 2020 | 3 | 20 | 0  | 0.7  | 0   | 0   | 0   | 1003 | 3.5  | 300 | 3.9 |
| 2020 | 3 | 20 | 1  | 0.9  | 0   | 0   | 0   | 1003 | 3.2  | 301 | 3.4 |
| 2020 | 3 | 20 | 2  | 1.3  | 0   | 0   | 0   | 1003 | 2.8  | 303 | 3   |
| 2020 | 3 | 20 | 3  | 1.8  | 0   | 0   | 0   | 1003 | 2.2  | 304 | 2.5 |
| 2020 | 3 | 20 | 4  | 1.4  | 0   | 0   | 0   | 1003 | 1.4  | 304 | 2   |
| 2020 | 3 | 20 | 5  | 0.8  | 0   | 0   | 0   | 1003 | 0.8  | 303 | 1.7 |
| 2020 | 3 | 20 | 6  | 0.6  | 0   | 0   | 0   | 1004 | 0.6  | 300 | 1.5 |
| 2020 | 3 | 20 | 7  | 3.5  | 28  | 216 | 43  | 1004 | 4.4  | 288 | 1.4 |
| 2020 | 3 | 20 | 8  | 2.5  | 74  | 618 | 246 | 1005 | 7.9  | 272 | 2.4 |
| 2020 | 3 | 20 | 9  | -0.5 | 100 | 775 | 463 | 1005 | 10.4 | 267 | 2.9 |
| 2020 | 3 | 20 | 10 | -1.3 | 118 | 857 | 655 | 1005 | 12   | 261 | 3.1 |
| 2020 | 3 | 20 | 11 | -1   | 129 | 897 | 794 | 1005 | 13.2 | 253 | 3.3 |
| 2020 | 3 | 20 | 12 | -0.6 | 133 | 915 | 871 | 1004 | 14   | 248 | 3.6 |
| 2020 | 3 | 20 | 13 | -0.6 | 139 | 910 | 881 | 1003 | 14.5 | 245 | 3.9 |
| 2020 | 3 | 20 | 14 | -0.7 | 136 | 891 | 823 | 1003 | 14.6 | 242 | 4.1 |
| 2020 | 3 | 20 | 15 | -0.8 | 144 | 816 | 692 | 1002 | 14.1 | 238 | 4.1 |
| 2020 | 3 | 20 | 16 | -0.8 | 128 | 731 | 514 | 1002 | 13.1 | 233 | 3.9 |
| 2020 | 3 | 20 | 17 | 1.3  | 100 | 593 | 307 | 1002 | 11.1 | 228 | 2.7 |
| 2020 | 3 | 20 | 18 | 3    | 53  | 289 | 95  | 1002 | 7    | 218 | 1.5 |
| 2020 | 3 | 20 | 19 | 2.1  | 0   | 0   | 0   | 1002 | 5.2  | 205 | 1.6 |
| 2020 | 3 | 20 | 20 | 2.1  | 0   | 0   | 0   | 1002 | 4.5  | 196 | 1.7 |
| 2020 | 3 | 20 | 21 | 2.6  | 0   | 0   | 0   | 1002 | 4.1  | 192 | 1.7 |
| 2020 | 3 | 20 | 22 | 3.3  | 0   | 0   | 0   | 1002 | 3.8  | 192 | 1.7 |
| 2020 | 3 | 20 | 23 | 3.6  | 0   | 0   | 0   | 1002 | 3.6  | 195 | 1.8 |
| 2020 | 3 | 21 | 0  | 3.5  | 0   | 0   | 0   | 1001 | 3.5  | 198 | 1.9 |
| 2020 | 3 | 21 | 1  | 3.5  | 0   | 0   | 0   | 1001 | 3.5  | 198 | 2.1 |

|      |   |    |    |      |     |     |     |      |      |     |     |
|------|---|----|----|------|-----|-----|-----|------|------|-----|-----|
| 2020 | 3 | 21 | 2  | 3.6  | 0   | 0   | 0   | 1001 | 3.6  | 198 | 2.1 |
| 2020 | 3 | 21 | 3  | 3.7  | 0   | 0   | 0   | 1001 | 3.7  | 199 | 2.1 |
| 2020 | 3 | 21 | 4  | 3.8  | 0   | 0   | 0   | 1001 | 3.8  | 201 | 2.1 |
| 2020 | 3 | 21 | 5  | 3.9  | 0   | 0   | 0   | 1001 | 3.9  | 202 | 2   |
| 2020 | 3 | 21 | 6  | 4.1  | 0   | 0   | 0   | 1002 | 4.1  | 202 | 1.8 |
| 2020 | 3 | 21 | 7  | 7.3  | 23  | 24  | 25  | 1002 | 7.6  | 199 | 2.2 |
| 2020 | 3 | 21 | 8  | 8.8  | 125 | 265 | 201 | 1002 | 11.1 | 202 | 3.4 |
| 2020 | 3 | 21 | 9  | 9.9  | 188 | 465 | 409 | 1002 | 13.9 | 217 | 3.8 |
| 2020 | 3 | 21 | 10 | 10.7 | 214 | 602 | 595 | 1002 | 16.2 | 219 | 3.8 |
| 2020 | 3 | 21 | 11 | 11.3 | 225 | 687 | 737 | 1001 | 18.1 | 214 | 4   |
| 2020 | 3 | 21 | 12 | 11.6 | 248 | 691 | 808 | 1001 | 19.5 | 212 | 4.4 |
| 2020 | 3 | 21 | 13 | 11.4 | 256 | 683 | 816 | 1000 | 20.4 | 211 | 4.8 |
| 2020 | 3 | 21 | 14 | 11.2 | 253 | 649 | 755 | 999  | 20.6 | 210 | 4.9 |
| 2020 | 3 | 21 | 15 | 11   | 258 | 538 | 621 | 998  | 20.1 | 209 | 4.7 |
| 2020 | 3 | 21 | 16 | 11.2 | 216 | 454 | 457 | 998  | 18.9 | 208 | 4.1 |
| 2020 | 3 | 21 | 17 | 12.2 | 156 | 310 | 265 | 998  | 16.7 | 205 | 2.7 |
| 2020 | 3 | 21 | 18 | 11.5 | 60  | 99  | 74  | 999  | 13   | 199 | 1.8 |
| 2020 | 3 | 21 | 19 | 11.1 | 0   | 0   | 0   | 999  | 11.5 | 197 | 2   |
| 2020 | 3 | 21 | 20 | 11.3 | 0   | 0   | 0   | 1000 | 11.3 | 199 | 2.3 |
| 2020 | 3 | 21 | 21 | 11   | 0   | 0   | 0   | 1000 | 11   | 202 | 2.3 |
| 2020 | 3 | 21 | 22 | 10.6 | 0   | 0   | 0   | 999  | 10.6 | 206 | 1.9 |
| 2020 | 3 | 21 | 23 | 10.2 | 0   | 0   | 0   | 999  | 10.2 | 217 | 1.4 |
| 2020 | 3 | 22 | 0  | 9.8  | 0   | 0   | 0   | 999  | 9.8  | 233 | 1.2 |
| 2020 | 3 | 22 | 1  | 9.9  | 0   | 0   | 0   | 999  | 9.9  | 251 | 1.3 |
| 2020 | 3 | 22 | 2  | 9.6  | 0   | 0   | 0   | 999  | 9.6  | 270 | 1.6 |
| 2020 | 3 | 22 | 3  | 8.7  | 0   | 0   | 0   | 999  | 8.7  | 304 | 1.6 |
| 2020 | 3 | 22 | 4  | 7.6  | 0   | 0   | 0   | 1000 | 7.6  | 331 | 1.5 |
| 2020 | 3 | 22 | 5  | 7.4  | 0   | 0   | 0   | 999  | 7.4  | 358 | 1.7 |
| 2020 | 3 | 22 | 6  | 7.5  | 0   | 0   | 0   | 999  | 7.7  | 15  | 2.5 |
| 2020 | 3 | 22 | 7  | 7.6  | 21  | 23  | 23  | 1000 | 8.6  | 13  | 3.4 |
| 2020 | 3 | 22 | 8  | 7.3  | 129 | 248 | 201 | 1001 | 9.4  | 4   | 3.5 |
| 2020 | 3 | 22 | 9  | 6.7  | 172 | 409 | 368 | 1001 | 10.4 | 8   | 3.7 |
| 2020 | 3 | 22 | 10 | 6.3  | 154 | 690 | 593 | 1001 | 11.5 | 8   | 3.6 |
| 2020 | 3 | 22 | 11 | 5.7  | 168 | 826 | 788 | 1000 | 12.9 | 9   | 3.6 |
| 2020 | 3 | 22 | 12 | 4.6  | 150 | 906 | 888 | 1000 | 14.4 | 4   | 3.6 |
| 2020 | 3 | 22 | 13 | 3.6  | 127 | 949 | 909 | 1000 | 16.4 | 2   | 3.6 |
| 2020 | 3 | 22 | 14 | 3.3  | 117 | 938 | 846 | 1000 | 17.6 | 354 | 3.4 |
| 2020 | 3 | 22 | 15 | 3.5  | 116 | 887 | 718 | 1000 | 17.5 | 340 | 3.5 |
| 2020 | 3 | 22 | 16 | 3.4  | 99  | 823 | 538 | 1000 | 16.4 | 334 | 4   |
| 2020 | 3 | 22 | 17 | 4.3  | 80  | 691 | 324 | 1000 | 13.8 | 329 | 4   |
| 2020 | 3 | 22 | 18 | 4.2  | 46  | 408 | 108 | 1002 | 9.6  | 326 | 3.6 |
| 2020 | 3 | 22 | 19 | 3.5  | 0   | 0   | 0   | 1003 | 7.2  | 334 | 3.8 |
| 2020 | 3 | 22 | 20 | 3.2  | 0   | 0   | 0   | 1003 | 6    | 342 | 3.8 |
| 2020 | 3 | 22 | 21 | 2.9  | 0   | 0   | 0   | 1004 | 5.2  | 347 | 3.5 |
| 2020 | 3 | 22 | 22 | 2.4  | 0   | 0   | 0   | 1004 | 4.3  | 352 | 2.9 |
| 2020 | 3 | 22 | 23 | 1.8  | 0   | 0   | 0   | 1004 | 3.5  | 356 | 2.4 |
| 2020 | 3 | 23 | 0  | 1.1  | 0   | 0   | 0   | 1004 | 2.6  | 358 | 1.9 |
| 2020 | 3 | 23 | 1  | 0.5  | 0   | 0   | 0   | 1004 | 2    | 0   | 1.7 |
| 2020 | 3 | 23 | 2  | -0.1 | 0   | 0   | 0   | 1004 | 1.5  | 1   | 1.6 |
| 2020 | 3 | 23 | 3  | -0.6 | 0   | 0   | 0   | 1005 | 1.1  | 2   | 1.5 |

|      |   |    |    |      |     |     |     |      |      |     |     |
|------|---|----|----|------|-----|-----|-----|------|------|-----|-----|
| 2020 | 3 | 23 | 4  | -1   | 0   | 0   | 0   | 1005 | 0.8  | 3   | 1.4 |
| 2020 | 3 | 23 | 5  | -1.3 | 0   | 0   | 0   | 1006 | 0.6  | 358 | 1.3 |
| 2020 | 3 | 23 | 6  | -1.3 | 0   | 0   | 0   | 1006 | 0.9  | 357 | 1.3 |
| 2020 | 3 | 23 | 7  | 0.6  | 32  | 192 | 49  | 1007 | 4.2  | 355 | 1.5 |
| 2020 | 3 | 23 | 8  | 0.9  | 83  | 568 | 250 | 1007 | 7.1  | 338 | 1.8 |
| 2020 | 3 | 23 | 9  | 1.1  | 110 | 740 | 468 | 1007 | 11   | 316 | 2.7 |
| 2020 | 3 | 23 | 10 | 1.6  | 129 | 824 | 657 | 1007 | 13.2 | 307 | 3.3 |
| 2020 | 3 | 23 | 11 | 2    | 146 | 854 | 791 | 1007 | 14.7 | 304 | 4.1 |
| 2020 | 3 | 23 | 12 | 2.1  | 174 | 838 | 860 | 1006 | 15.4 | 300 | 4.9 |
| 2020 | 3 | 23 | 13 | 2    | 185 | 825 | 868 | 1006 | 15.5 | 295 | 5.5 |
| 2020 | 3 | 23 | 14 | 2    | 177 | 816 | 814 | 1005 | 15.2 | 293 | 5.9 |
| 2020 | 3 | 23 | 15 | 2.3  | 153 | 802 | 699 | 1005 | 14.6 | 293 | 5.8 |
| 2020 | 3 | 23 | 16 | 3    | 130 | 737 | 526 | 1005 | 13.4 | 296 | 5.2 |
| 2020 | 3 | 23 | 17 | 4.2  | 101 | 606 | 317 | 1005 | 11.6 | 300 | 4.1 |
| 2020 | 3 | 23 | 18 | 5.3  | 55  | 317 | 104 | 1005 | 8.1  | 299 | 2.3 |
| 2020 | 3 | 23 | 19 | 5.6  | 0   | 0   | 0   | 1006 | 6.1  | 301 | 2.1 |
| 2020 | 3 | 23 | 20 | 5.1  | 0   | 0   | 0   | 1006 | 5.1  | 309 | 1.9 |
| 2020 | 3 | 23 | 21 | 5.9  | 0   | 0   | 0   | 1007 | 5.9  | 320 | 2.5 |
| 2020 | 3 | 23 | 22 | 5.2  | 0   | 0   | 0   | 1007 | 5.9  | 331 | 3   |
| 2020 | 3 | 23 | 23 | 3.6  | 0   | 0   | 0   | 1007 | 3.6  | 340 | 1.5 |
| 2020 | 3 | 24 | 0  | 2.9  | 0   | 0   | 0   | 1007 | 2.9  | 348 | 1.3 |
| 2020 | 3 | 24 | 1  | 3.4  | 0   | 0   | 0   | 1007 | 3.4  | 355 | 2.2 |
| 2020 | 3 | 24 | 2  | 2.6  | 0   | 0   | 0   | 1007 | 2.6  | 358 | 1.9 |
| 2020 | 3 | 24 | 3  | 2.2  | 0   | 0   | 0   | 1007 | 2.3  | 5   | 1.9 |
| 2020 | 3 | 24 | 4  | 1.6  | 0   | 0   | 0   | 1007 | 1.9  | 19  | 1.8 |
| 2020 | 3 | 24 | 5  | 0.8  | 0   | 0   | 0   | 1007 | 0.8  | 24  | 1.2 |
| 2020 | 3 | 24 | 6  | -0.3 | 0   | 0   | 0   | 1008 | 0.1  | 37  | 1   |
| 2020 | 3 | 24 | 7  | 0    | 35  | 180 | 51  | 1008 | 3.5  | 50  | 1.6 |
| 2020 | 3 | 24 | 8  | 0.6  | 90  | 548 | 254 | 1009 | 6.6  | 66  | 1.6 |
| 2020 | 3 | 24 | 9  | 1.3  | 117 | 725 | 471 | 1009 | 11.2 | 74  | 1.6 |
| 2020 | 3 | 24 | 10 | 1.2  | 134 | 819 | 663 | 1008 | 14.2 | 59  | 1.6 |
| 2020 | 3 | 24 | 11 | 2.1  | 145 | 866 | 802 | 1008 | 15.5 | 53  | 1.4 |
| 2020 | 3 | 24 | 12 | 2.7  | 164 | 862 | 873 | 1008 | 16.6 | 49  | 1   |
| 2020 | 3 | 24 | 13 | 3.2  | 168 | 855 | 878 | 1007 | 17.3 | 26  | 0.6 |
| 2020 | 3 | 24 | 14 | 3.5  | 167 | 830 | 817 | 1007 | 17.7 | 316 | 0.6 |
| 2020 | 3 | 24 | 15 | 3.7  | 158 | 778 | 690 | 1007 | 17.5 | 300 | 1.1 |
| 2020 | 3 | 24 | 16 | 4    | 139 | 697 | 515 | 1006 | 16.8 | 298 | 1.4 |
| 2020 | 3 | 24 | 17 | 6    | 108 | 555 | 308 | 1007 | 15.1 | 294 | 1.1 |
| 2020 | 3 | 24 | 18 | 6.5  | 56  | 285 | 101 | 1007 | 10.8 | 291 | 0.9 |
| 2020 | 3 | 24 | 19 | 4.9  | 0   | 0   | 0   | 1007 | 8.5  | 293 | 0.8 |
| 2020 | 3 | 24 | 20 | 3.9  | 0   | 0   | 0   | 1008 | 7.8  | 307 | 0.5 |
| 2020 | 3 | 24 | 21 | 3.1  | 0   | 0   | 0   | 1008 | 7.7  | 35  | 0.2 |
| 2020 | 3 | 24 | 22 | 3.2  | 0   | 0   | 0   | 1009 | 7.2  | 118 | 0.7 |
| 2020 | 3 | 24 | 23 | 3.6  | 0   | 0   | 0   | 1009 | 6.9  | 133 | 1   |
| 2020 | 3 | 25 | 0  | 4.4  | 0   | 0   | 0   | 1009 | 5.8  | 140 | 1.2 |
| 2020 | 3 | 25 | 1  | 4.6  | 0   | 0   | 0   | 1009 | 4.6  | 140 | 1.3 |
| 2020 | 3 | 25 | 2  | 3.9  | 0   | 0   | 0   | 1009 | 3.9  | 135 | 1.4 |
| 2020 | 3 | 25 | 3  | 3.5  | 0   | 0   | 0   | 1008 | 3.5  | 130 | 1.5 |
| 2020 | 3 | 25 | 4  | 3.3  | 0   | 0   | 0   | 1008 | 3.3  | 128 | 1.6 |
| 2020 | 3 | 25 | 5  | 3.2  | 0   | 0   | 0   | 1008 | 3.2  | 129 | 1.7 |



|      |   |    |    |      |     |     |     |      |      |     |     |
|------|---|----|----|------|-----|-----|-----|------|------|-----|-----|
| 2020 | 3 | 25 | 6  | 3.4  | 0   | 0   | 0   | 1008 | 3.4  | 129 | 1.7 |
| 2020 | 3 | 25 | 7  | 5.8  | 38  | 175 | 55  | 1008 | 7.4  | 125 | 2.7 |
| 2020 | 3 | 25 | 8  | 6.2  | 94  | 528 | 254 | 1009 | 10.8 | 129 | 3.7 |
| 2020 | 3 | 25 | 9  | 6    | 123 | 704 | 470 | 1009 | 13.4 | 135 | 4.3 |
| 2020 | 3 | 25 | 10 | 6.2  | 142 | 792 | 656 | 1009 | 15.2 | 135 | 4.4 |
| 2020 | 3 | 25 | 11 | 6.5  | 154 | 841 | 796 | 1008 | 16.5 | 138 | 4.5 |
| 2020 | 3 | 25 | 12 | 6.7  | 161 | 864 | 874 | 1008 | 17.4 | 144 | 4.4 |
| 2020 | 3 | 25 | 13 | 6.8  | 164 | 861 | 882 | 1007 | 17.9 | 148 | 4.2 |
| 2020 | 3 | 25 | 14 | 6.7  | 162 | 838 | 822 | 1007 | 17.9 | 145 | 4   |
| 2020 | 3 | 25 | 15 | 6.4  | 164 | 773 | 695 | 1006 | 17.2 | 143 | 3.6 |
| 2020 | 3 | 25 | 16 | 7.7  | 142 | 701 | 522 | 1006 | 15.2 | 143 | 2.3 |
| 2020 | 3 | 25 | 17 | 9    | 105 | 587 | 318 | 1006 | 13   | 143 | 1.5 |
| 2020 | 3 | 25 | 18 | 8.2  | 33  | 0   | 33  | 1006 | 11.3 | 140 | 1.5 |
| 2020 | 3 | 25 | 19 | 7.4  | 0   | 0   | 0   | 1006 | 10.5 | 133 | 1.6 |
| 2020 | 3 | 25 | 20 | 6.4  | 0   | 0   | 0   | 1006 | 9.4  | 128 | 1.7 |
| 2020 | 3 | 25 | 21 | 5.8  | 0   | 0   | 0   | 1006 | 8.8  | 126 | 2   |
| 2020 | 3 | 25 | 22 | 5.7  | 0   | 0   | 0   | 1007 | 8.2  | 127 | 1.8 |
| 2020 | 3 | 25 | 23 | 5.7  | 0   | 0   | 0   | 1007 | 8    | 120 | 1.7 |
| 2020 | 3 | 26 | 0  | 6.1  | 0   | 0   | 0   | 1006 | 8.7  | 115 | 2.1 |
| 2020 | 3 | 26 | 1  | 6.6  | 0   | 0   | 0   | 1007 | 9.1  | 118 | 2.2 |
| 2020 | 3 | 26 | 2  | 7.2  | 0   | 0   | 0   | 1006 | 9.3  | 123 | 2.3 |
| 2020 | 3 | 26 | 3  | 7.9  | 0   | 0   | 0   | 1006 | 9.6  | 132 | 2.8 |
| 2020 | 3 | 26 | 4  | 9    | 0   | 0   | 0   | 1006 | 9.9  | 137 | 3.3 |
| 2020 | 3 | 26 | 5  | 9.8  | 0   | 0   | 0   | 1005 | 10.3 | 136 | 3.7 |
| 2020 | 3 | 26 | 6  | 10.3 | 0   | 0   | 0   | 1005 | 10.7 | 130 | 3.6 |
| 2020 | 3 | 26 | 7  | 10.7 | 20  | 0   | 20  | 1005 | 11.3 | 125 | 3.7 |
| 2020 | 3 | 26 | 8  | 11.3 | 30  | 0   | 30  | 1005 | 12.2 | 124 | 4   |
| 2020 | 3 | 26 | 9  | 11.8 | 125 | 0   | 125 | 1005 | 13   | 119 | 4.3 |
| 2020 | 3 | 26 | 10 | 12.1 | 63  | 0   | 63  | 1004 | 13.6 | 116 | 4.7 |
| 2020 | 3 | 26 | 11 | 12.4 | 105 | 0   | 105 | 1004 | 14.2 | 116 | 5   |
| 2020 | 3 | 26 | 12 | 12.9 | 144 | 0   | 144 | 1003 | 15.1 | 121 | 5.5 |
| 2020 | 3 | 26 | 13 | 13.6 | 170 | 5   | 174 | 1002 | 15.8 | 124 | 5.5 |
| 2020 | 3 | 26 | 14 | 14   | 143 | 0   | 143 | 1001 | 15.8 | 126 | 5.2 |
| 2020 | 3 | 26 | 15 | 14.4 | 242 | 16  | 253 | 1000 | 15.6 | 128 | 4.6 |
| 2020 | 3 | 26 | 16 | 14.6 | 167 | 2   | 168 | 999  | 15.5 | 131 | 4.3 |
| 2020 | 3 | 26 | 17 | 14.5 | 32  | 0   | 32  | 999  | 15.1 | 134 | 3.8 |
| 2020 | 3 | 26 | 18 | 14.2 | 29  | 0   | 29  | 999  | 14.7 | 132 | 3.1 |
| 2020 | 3 | 26 | 19 | 14   | 0   | 0   | 0   | 999  | 14.3 | 125 | 2.6 |
| 2020 | 3 | 26 | 20 | 13.9 | 0   | 0   | 0   | 999  | 14   | 124 | 2.2 |
| 2020 | 3 | 26 | 21 | 13.4 | 0   | 0   | 0   | 999  | 13.4 | 126 | 1.7 |
| 2020 | 3 | 26 | 22 | 13   | 0   | 0   | 0   | 999  | 13   | 140 | 1.3 |
| 2020 | 3 | 26 | 23 | 13.1 | 0   | 0   | 0   | 999  | 13.1 | 158 | 1.2 |
| 2020 | 3 | 27 | 0  | 13.1 | 0   | 0   | 0   | 999  | 13.1 | 172 | 1.2 |
| 2020 | 3 | 27 | 1  | 13   | 0   | 0   | 0   | 998  | 13   | 184 | 1.1 |
| 2020 | 3 | 27 | 2  | 12.9 | 0   | 0   | 0   | 997  | 12.9 | 202 | 0.9 |
| 2020 | 3 | 27 | 3  | 12.6 | 0   | 0   | 0   | 997  | 12.6 | 248 | 0.8 |
| 2020 | 3 | 27 | 4  | 12.3 | 0   | 0   | 0   | 996  | 12.4 | 290 | 1.5 |
| 2020 | 3 | 27 | 5  | 11.6 | 0   | 0   | 0   | 997  | 11.8 | 322 | 2.2 |
| 2020 | 3 | 27 | 6  | 10.9 | 0   | 0   | 0   | 996  | 11.2 | 342 | 2.3 |
| 2020 | 3 | 27 | 7  | 10.7 | 13  | 0   | 13  | 997  | 11.2 | 332 | 3.3 |

|      |   |    |    |      |     |     |     |      |      |     |     |
|------|---|----|----|------|-----|-----|-----|------|------|-----|-----|
| 2020 | 3 | 27 | 8  | 10.4 | 57  | 0   | 57  | 998  | 11.3 | 327 | 4.6 |
| 2020 | 3 | 27 | 9  | 10.1 | 67  | 0   | 67  | 998  | 11.7 | 332 | 5.6 |
| 2020 | 3 | 27 | 10 | 9.4  | 149 | 0   | 149 | 999  | 11.9 | 331 | 6.3 |
| 2020 | 3 | 27 | 11 | 9.1  | 226 | 10  | 234 | 1000 | 13   | 331 | 5.6 |
| 2020 | 3 | 27 | 12 | 8.9  | 134 | 0   | 134 | 1001 | 13.7 | 324 | 5.3 |
| 2020 | 3 | 27 | 13 | 7.6  | 84  | 0   | 84  | 1001 | 13.4 | 318 | 6.5 |
| 2020 | 3 | 27 | 14 | 5.2  | 219 | 719 | 789 | 1001 | 12.4 | 317 | 7.5 |
| 2020 | 3 | 27 | 15 | 2.6  | 276 | 31  | 298 | 1002 | 11.3 | 318 | 7.6 |
| 2020 | 3 | 27 | 16 | 0.5  | 164 | 632 | 511 | 1002 | 9.7  | 324 | 7   |
| 2020 | 3 | 27 | 17 | -0.4 | 133 | 475 | 308 | 1003 | 8    | 327 | 6.7 |
| 2020 | 3 | 27 | 18 | -0.7 | 72  | 181 | 102 | 1004 | 5.8  | 328 | 5.8 |
| 2020 | 3 | 27 | 19 | -0.3 | 0   | 0   | 0   | 1005 | 4.5  | 331 | 4.6 |
| 2020 | 3 | 27 | 20 | -0.1 | 0   | 0   | 0   | 1005 | 3.9  | 335 | 4.3 |
| 2020 | 3 | 27 | 21 | 0.5  | 0   | 0   | 0   | 1006 | 3.8  | 334 | 3.7 |
| 2020 | 3 | 27 | 22 | 1    | 0   | 0   | 0   | 1007 | 3.8  | 335 | 3.1 |
| 2020 | 3 | 27 | 23 | 1.4  | 0   | 0   | 0   | 1007 | 3.9  | 336 | 2.8 |
| 2020 | 3 | 28 | 0  | 1.6  | 0   | 0   | 0   | 1007 | 4.4  | 340 | 3.4 |
| 2020 | 3 | 28 | 1  | 1.7  | 0   | 0   | 0   | 1007 | 4.6  | 342 | 3.7 |
| 2020 | 3 | 28 | 2  | 1.7  | 0   | 0   | 0   | 1007 | 4.5  | 349 | 3.8 |
| 2020 | 3 | 28 | 3  | 1.5  | 0   | 0   | 0   | 1007 | 4.3  | 353 | 3.8 |
| 2020 | 3 | 28 | 4  | 1    | 0   | 0   | 0   | 1007 | 4    | 358 | 3.9 |
| 2020 | 3 | 28 | 5  | 0.4  | 0   | 0   | 0   | 1007 | 3.8  | 1   | 4   |
| 2020 | 3 | 28 | 6  | 0    | 0   | 0   | 0   | 1008 | 3.7  | 0   | 3.7 |
| 2020 | 3 | 28 | 7  | -0.3 | 26  | 0   | 26  | 1008 | 4    | 1   | 3.7 |
| 2020 | 3 | 28 | 8  | -0.5 | 99  | 0   | 99  | 1009 | 4.8  | 1   | 3.9 |
| 2020 | 3 | 28 | 9  | -1.3 | 209 | 56  | 238 | 1008 | 5.7  | 5   | 4.4 |
| 2020 | 3 | 28 | 10 | -3.4 | 311 | 159 | 417 | 1008 | 6.5  | 7   | 4.6 |
| 2020 | 3 | 28 | 11 | -4.6 | 357 | 70  | 411 | 1008 | 7.5  | 10  | 4.4 |
| 2020 | 3 | 28 | 12 | -4.5 | 366 | 45  | 404 | 1007 | 7.9  | 13  | 3.8 |
| 2020 | 3 | 28 | 13 | -4   | 397 | 70  | 456 | 1007 | 8.2  | 10  | 3.2 |
| 2020 | 3 | 28 | 14 | -3.7 | 393 | 195 | 548 | 1007 | 8.4  | 3   | 2.9 |
| 2020 | 3 | 28 | 15 | -3.5 | 322 | 89  | 384 | 1006 | 8.5  | 355 | 3.1 |
| 2020 | 3 | 28 | 16 | -2.7 | 247 | 166 | 339 | 1006 | 8.2  | 352 | 3.1 |
| 2020 | 3 | 28 | 17 | 0    | 150 | 84  | 182 | 1006 | 6.8  | 347 | 2.3 |
| 2020 | 3 | 28 | 18 | 0.6  | 58  | 23  | 62  | 1007 | 5.1  | 346 | 2   |
| 2020 | 3 | 28 | 19 | 0.6  | 0   | 0   | 0   | 1007 | 4.4  | 348 | 2.2 |
| 2020 | 3 | 28 | 20 | 0.5  | 0   | 0   | 0   | 1008 | 4.1  | 350 | 2.7 |
| 2020 | 3 | 28 | 21 | 0.8  | 0   | 0   | 0   | 1008 | 3.5  | 357 | 2.5 |
| 2020 | 3 | 28 | 22 | 0.7  | 0   | 0   | 0   | 1008 | 2.8  | 7   | 2.1 |
| 2020 | 3 | 28 | 23 | -0.2 | 0   | 0   | 0   | 1008 | 1.1  | 7   | 1.6 |
| 2020 | 3 | 29 | 0  | -0.5 | 0   | 0   | 0   | 1009 | 0.2  | 4   | 1.5 |
| 2020 | 3 | 29 | 1  | -0.5 | 0   | 0   | 0   | 1009 | 0.2  | 11  | 1.5 |
| 2020 | 3 | 29 | 2  | -0.6 | 0   | 0   | 0   | 1009 | -0.1 | 12  | 1.6 |
| 2020 | 3 | 29 | 3  | -0.9 | 0   | 0   | 0   | 1009 | -0.6 | 21  | 1.4 |
| 2020 | 3 | 29 | 4  | -1.9 | 0   | 0   | 0   | 1009 | -1.1 | 36  | 1.3 |
| 2020 | 3 | 29 | 5  | -3.5 | 0   | 0   | 0   | 1008 | -1.5 | 56  | 1.4 |
| 2020 | 3 | 29 | 6  | -4   | 0   | 0   | 0   | 1008 | -1.2 | 72  | 1.3 |
| 2020 | 3 | 29 | 7  | -2   | 48  | 184 | 69  | 1009 | 3    | 80  | 1.8 |
| 2020 | 3 | 29 | 8  | -0.8 | 127 | 184 | 186 | 1010 | 6.5  | 87  | 1.9 |
| 2020 | 3 | 29 | 9  | 1.6  | 146 | 674 | 490 | 1009 | 9.9  | 85  | 2.9 |

|      |   |    |    |     |     |     |     |      |      |     |     |
|------|---|----|----|-----|-----|-----|-----|------|------|-----|-----|
| 2020 | 3 | 29 | 10 | 2.2 | 181 | 737 | 672 | 1009 | 11.5 | 91  | 2.3 |
| 2020 | 3 | 29 | 11 | 2.3 | 200 | 777 | 805 | 1008 | 12   | 108 | 1.9 |
| 2020 | 3 | 29 | 12 | 2.8 | 184 | 833 | 886 | 1008 | 12.8 | 120 | 1.7 |
| 2020 | 3 | 29 | 13 | 3.8 | 300 | 585 | 797 | 1008 | 14.2 | 156 | 1.6 |
| 2020 | 3 | 29 | 14 | 4   | 180 | 810 | 828 | 1007 | 14.5 | 167 | 1.5 |
| 2020 | 3 | 29 | 15 | 3.9 | 290 | 396 | 567 | 1007 | 14.3 | 201 | 1.7 |
| 2020 | 3 | 29 | 16 | 4   | 242 | 235 | 373 | 1007 | 13.4 | 215 | 2   |
| 2020 | 3 | 29 | 17 | 5.9 | 133 | 13  | 138 | 1007 | 11.5 | 238 | 1.3 |
| 2020 | 3 | 29 | 18 | 6.3 | 46  | 0   | 46  | 1007 | 9.2  | 277 | 1   |
| 2020 | 3 | 29 | 19 | 5   | 0   | 0   | 0   | 1008 | 7.8  | 307 | 1.3 |
| 2020 | 3 | 29 | 20 | 4.3 | 0   | 0   | 0   | 1008 | 6.7  | 334 | 1.5 |
| 2020 | 3 | 29 | 21 | 4.1 | 0   | 0   | 0   | 1008 | 6.1  | 1   | 1.2 |
| 2020 | 3 | 29 | 22 | 4   | 0   | 0   | 0   | 1008 | 5.7  | 20  | 1   |
| 2020 | 3 | 29 | 23 | 3.6 | 0   | 0   | 0   | 1008 | 5.2  | 33  | 0.8 |
| 2020 | 3 | 30 | 0  | 3.8 | 0   | 0   | 0   | 1008 | 5.4  | 58  | 0.7 |
| 2020 | 3 | 30 | 1  | 3.9 | 0   | 0   | 0   | 1008 | 5.6  | 82  | 0.8 |
| 2020 | 3 | 30 | 2  | 4.1 | 0   | 0   | 0   | 1008 | 5.7  | 109 | 0.9 |
| 2020 | 3 | 30 | 3  | 4.3 | 0   | 0   | 0   | 1008 | 5.3  | 138 | 1   |
| 2020 | 3 | 30 | 4  | 4.4 | 0   | 0   | 0   | 1008 | 5    | 142 | 1   |
| 2020 | 3 | 30 | 5  | 4.3 | 0   | 0   | 0   | 1008 | 4.9  | 134 | 1.1 |
| 2020 | 3 | 30 | 6  | 3.9 | 0   | 0   | 0   | 1008 | 4.5  | 124 | 1   |
| 2020 | 3 | 30 | 7  | 4.6 | 52  | 108 | 65  | 1008 | 7.2  | 109 | 1.6 |
| 2020 | 3 | 30 | 8  | 4.2 | 138 | 376 | 261 | 1008 | 9.5  | 110 | 1.9 |
| 2020 | 3 | 30 | 9  | 4.4 | 176 | 464 | 415 | 1009 | 11   | 104 | 1.4 |
| 2020 | 3 | 30 | 10 | 4.4 | 201 | 680 | 657 | 1008 | 12   | 74  | 0.9 |
| 2020 | 3 | 30 | 11 | 4.3 | 306 | 461 | 667 | 1008 | 13.1 | 12  | 0.7 |
| 2020 | 3 | 30 | 12 | 4.3 | 301 | 579 | 790 | 1008 | 14   | 1   | 0.9 |
| 2020 | 3 | 30 | 13 | 4.4 | 315 | 556 | 789 | 1007 | 14.6 | 357 | 1.1 |
| 2020 | 3 | 30 | 14 | 4.5 | 206 | 771 | 826 | 1006 | 15.2 | 343 | 1   |
| 2020 | 3 | 30 | 15 | 4.4 | 295 | 383 | 564 | 1006 | 15.4 | 322 | 0.9 |
| 2020 | 3 | 30 | 16 | 4.4 | 173 | 631 | 524 | 1006 | 15.2 | 301 | 0.9 |
| 2020 | 3 | 30 | 17 | 5.7 | 133 | 493 | 319 | 1006 | 14.2 | 299 | 1   |
| 2020 | 3 | 30 | 18 | 6.2 | 62  | 132 | 85  | 1006 | 11.1 | 303 | 0.9 |
| 2020 | 3 | 30 | 19 | 4.9 | 0   | 0   | 0   | 1007 | 8.7  | 320 | 1.2 |
| 2020 | 3 | 30 | 20 | 4.5 | 0   | 0   | 0   | 1007 | 7.3  | 342 | 1.3 |
| 2020 | 3 | 30 | 21 | 4.1 | 0   | 0   | 0   | 1007 | 6.3  | 6   | 1.2 |
| 2020 | 3 | 30 | 22 | 3.7 | 0   | 0   | 0   | 1007 | 5.7  | 24  | 1.1 |
| 2020 | 3 | 30 | 23 | 3.2 | 0   | 0   | 0   | 1007 | 5.4  | 33  | 1   |
| 2020 | 3 | 31 | 0  | 2.8 | 0   | 0   | 0   | 1007 | 5.4  | 36  | 0.9 |
| 2020 | 3 | 31 | 1  | 2.3 | 0   | 0   | 0   | 1007 | 5.2  | 36  | 1   |
| 2020 | 3 | 31 | 2  | 2   | 0   | 0   | 0   | 1007 | 4.7  | 33  | 1.1 |
| 2020 | 3 | 31 | 3  | 2.1 | 0   | 0   | 0   | 1007 | 4.3  | 38  | 1.2 |
| 2020 | 3 | 31 | 4  | 2.3 | 0   | 0   | 0   | 1006 | 4    | 46  | 1.2 |
| 2020 | 3 | 31 | 5  | 2.6 | 0   | 0   | 0   | 1006 | 3.8  | 54  | 1.2 |
| 2020 | 3 | 31 | 6  | 3   | 0   | 0   | 0   | 1006 | 3.8  | 55  | 1.2 |
| 2020 | 3 | 31 | 7  | 4.6 | 52  | 144 | 70  | 1006 | 6.9  | 52  | 1.3 |
| 2020 | 3 | 31 | 8  | 5.3 | 122 | 441 | 269 | 1006 | 9.9  | 55  | 1.5 |
| 2020 | 3 | 31 | 9  | 4.8 | 161 | 612 | 479 | 1006 | 13.6 | 43  | 1.3 |
| 2020 | 3 | 31 | 10 | 5.3 | 185 | 704 | 661 | 1006 | 15.7 | 34  | 0.8 |
| 2020 | 3 | 31 | 11 | 5.6 | 202 | 754 | 796 | 1006 | 17.2 | 4   | 0.5 |

|      |   |    |    |      |     |     |     |      |      |     |     |
|------|---|----|----|------|-----|-----|-----|------|------|-----|-----|
| 2020 | 3 | 31 | 12 | 6    | 352 | 435 | 721 | 1005 | 18.1 | 336 | 0.8 |
| 2020 | 3 | 31 | 13 | 6.3  | 358 | 430 | 726 | 1004 | 18.7 | 348 | 1.2 |
| 2020 | 3 | 31 | 14 | 6.4  | 297 | 524 | 720 | 1002 | 18.8 | 346 | 1.3 |
| 2020 | 3 | 31 | 15 | 6.6  | 211 | 668 | 683 | 1002 | 18.8 | 322 | 1.3 |
| 2020 | 3 | 31 | 16 | 6.8  | 233 | 312 | 407 | 1001 | 18   | 304 | 1.6 |
| 2020 | 3 | 31 | 17 | 7.6  | 152 | 406 | 306 | 1001 | 16.2 | 307 | 2   |
| 2020 | 3 | 31 | 18 | 7.9  | 63  | 55  | 73  | 1002 | 12.7 | 318 | 2.1 |
| 2020 | 3 | 31 | 19 | 6.8  | 0   | 0   | 0   | 1002 | 10.3 | 338 | 2   |
| 2020 | 3 | 31 | 20 | 5.8  | 0   | 0   | 0   | 1002 | 9.1  | 347 | 1.7 |
| 2020 | 3 | 31 | 21 | 5.5  | 0   | 0   | 0   | 1003 | 8.3  | 335 | 1.5 |
| 2020 | 3 | 31 | 22 | 4.8  | 0   | 0   | 0   | 1003 | 7.4  | 337 | 2.1 |
| 2020 | 3 | 31 | 23 | 4.4  | 0   | 0   | 0   | 1002 | 7    | 359 | 2.5 |
| 2020 | 4 | 1  | 0  | 4.9  | 0   | 0   | 0   | 1001 | 6.6  | 355 | 1.7 |
| 2020 | 4 | 1  | 1  | 5.2  | 0   | 0   | 0   | 1001 | 6.2  | 340 | 1.5 |
| 2020 | 4 | 1  | 2  | 5.3  | 0   | 0   | 0   | 1002 | 6.5  | 334 | 2.2 |
| 2020 | 4 | 1  | 3  | 5.3  | 0   | 0   | 0   | 1002 | 6.4  | 332 | 2   |
| 2020 | 4 | 1  | 4  | 5.2  | 0   | 0   | 0   | 1002 | 6.1  | 330 | 1.6 |
| 2020 | 4 | 1  | 5  | 5.3  | 0   | 0   | 0   | 1002 | 5.9  | 324 | 1.7 |
| 2020 | 4 | 1  | 6  | 5.5  | 0   | 0   | 0   | 1002 | 5.9  | 323 | 2   |
| 2020 | 4 | 1  | 7  | 5.9  | 32  | 0   | 32  | 1002 | 6.6  | 325 | 2.6 |
| 2020 | 4 | 1  | 8  | 6.1  | 135 | 156 | 188 | 1002 | 7.3  | 320 | 2.7 |
| 2020 | 4 | 1  | 9  | 5.9  | 224 | 251 | 355 | 1002 | 8.6  | 315 | 3.5 |
| 2020 | 4 | 1  | 10 | 5.4  | 310 | 268 | 492 | 1002 | 10.8 | 318 | 4.4 |
| 2020 | 4 | 1  | 11 | 5.2  | 322 | 433 | 665 | 1002 | 13   | 320 | 4.9 |
| 2020 | 4 | 1  | 12 | 5.6  | 398 | 473 | 801 | 1002 | 14.9 | 322 | 5.5 |
| 2020 | 4 | 1  | 13 | 5.7  | 393 | 483 | 808 | 1001 | 15.6 | 323 | 6.1 |
| 2020 | 4 | 1  | 14 | 4.8  | 341 | 524 | 765 | 1001 | 15.4 | 323 | 6.6 |
| 2020 | 4 | 1  | 15 | 2.7  | 317 | 464 | 645 | 1002 | 14   | 320 | 7.2 |
| 2020 | 4 | 1  | 16 | 0.7  | 246 | 443 | 496 | 1003 | 11.6 | 319 | 7.2 |
| 2020 | 4 | 1  | 17 | -0.3 | 169 | 359 | 306 | 1004 | 9.1  | 321 | 6.6 |
| 2020 | 4 | 1  | 18 | -0.2 | 81  | 161 | 109 | 1005 | 6.4  | 322 | 5.2 |
| 2020 | 4 | 1  | 19 | 0    | 0   | 0   | 0   | 1005 | 4.7  | 322 | 4.4 |
| 2020 | 4 | 1  | 20 | 0.3  | 0   | 0   | 0   | 1006 | 4    | 323 | 4   |
| 2020 | 4 | 1  | 21 | 0.6  | 0   | 0   | 0   | 1006 | 3.2  | 323 | 3.2 |
| 2020 | 4 | 1  | 22 | 0.9  | 0   | 0   | 0   | 1006 | 2.8  | 324 | 2.7 |
| 2020 | 4 | 1  | 23 | 1.2  | 0   | 0   | 0   | 1006 | 2.6  | 328 | 2.4 |
| 2020 | 4 | 2  | 0  | 1.6  | 0   | 0   | 0   | 1006 | 2.5  | 333 | 2.2 |
| 2020 | 4 | 2  | 1  | 2    | 0   | 0   | 0   | 1007 | 2.5  | 336 | 1.9 |
| 2020 | 4 | 2  | 2  | 2.4  | 0   | 0   | 0   | 1007 | 2.5  | 338 | 1.7 |
| 2020 | 4 | 2  | 3  | 2.4  | 0   | 0   | 0   | 1008 | 2.4  | 342 | 1.6 |
| 2020 | 4 | 2  | 4  | 1.8  | 0   | 0   | 0   | 1008 | 1.8  | 347 | 1.4 |
| 2020 | 4 | 2  | 5  | 1    | 0   | 0   | 0   | 1008 | 1    | 0   | 1.3 |
| 2020 | 4 | 2  | 6  | 1.2  | 0   | 0   | 0   | 1009 | 1.2  | 16  | 1.2 |
| 2020 | 4 | 2  | 7  | 2.5  | 57  | 116 | 73  | 1010 | 4.2  | 28  | 1.9 |
| 2020 | 4 | 2  | 8  | 2.5  | 150 | 358 | 273 | 1010 | 7    | 28  | 1.6 |
| 2020 | 4 | 2  | 9  | 0.8  | 214 | 501 | 479 | 1011 | 11   | 27  | 2   |
| 2020 | 4 | 2  | 10 | 0.7  | 261 | 588 | 663 | 1011 | 12.8 | 32  | 1.7 |
| 2020 | 4 | 2  | 11 | 1    | 325 | 430 | 667 | 1011 | 14.1 | 32  | 1.1 |
| 2020 | 4 | 2  | 12 | 1.1  | 378 | 388 | 710 | 1010 | 15.2 | 342 | 0.5 |
| 2020 | 4 | 2  | 13 | 1.5  | 357 | 573 | 851 | 1009 | 15.9 | 285 | 1   |

|      |   |   |    |      |     |     |     |      |      |     |     |
|------|---|---|----|------|-----|-----|-----|------|------|-----|-----|
| 2020 | 4 | 2 | 14 | 1.8  | 332 | 571 | 796 | 1009 | 16.1 | 280 | 1.7 |
| 2020 | 4 | 2 | 15 | 2.1  | 308 | 509 | 671 | 1009 | 15.9 | 283 | 2.4 |
| 2020 | 4 | 2 | 16 | 2.3  | 263 | 420 | 500 | 1008 | 14.9 | 292 | 2.7 |
| 2020 | 4 | 2 | 17 | 3.6  | 158 | 135 | 210 | 1009 | 13   | 303 | 2.7 |
| 2020 | 4 | 2 | 18 | 4.8  | 80  | 110 | 100 | 1009 | 9.4  | 315 | 1.9 |
| 2020 | 4 | 2 | 19 | 4.3  | 0   | 0   | 0   | 1010 | 7.3  | 329 | 1.7 |
| 2020 | 4 | 2 | 20 | 3.9  | 0   | 0   | 0   | 1010 | 6.4  | 341 | 1.5 |
| 2020 | 4 | 2 | 21 | 3.2  | 0   | 0   | 0   | 1010 | 5.3  | 349 | 1.3 |
| 2020 | 4 | 2 | 22 | 2.2  | 0   | 0   | 0   | 1010 | 4.1  | 351 | 1.2 |
| 2020 | 4 | 2 | 23 | 1.6  | 0   | 0   | 0   | 1010 | 3.6  | 351 | 1.1 |
| 2020 | 4 | 3 | 0  | 1.4  | 0   | 0   | 0   | 1010 | 3    | 350 | 1.2 |
| 2020 | 4 | 3 | 1  | 1.4  | 0   | 0   | 0   | 1010 | 2.8  | 354 | 1.1 |
| 2020 | 4 | 3 | 2  | 1.1  | 0   | 0   | 0   | 1010 | 2    | 355 | 1.2 |
| 2020 | 4 | 3 | 3  | 1.2  | 0   | 0   | 0   | 1010 | 2.2  | 350 | 1.2 |
| 2020 | 4 | 3 | 4  | 1.4  | 0   | 0   | 0   | 1010 | 2.2  | 351 | 1.2 |
| 2020 | 4 | 3 | 5  | 1.2  | 0   | 0   | 0   | 1010 | 1.5  | 356 | 1.4 |
| 2020 | 4 | 3 | 6  | 0.7  | 0   | 0   | 0   | 1010 | 1.2  | 4   | 1.5 |
| 2020 | 4 | 3 | 7  | 1    | 62  | 112 | 77  | 1010 | 4.3  | 8   | 2.6 |
| 2020 | 4 | 3 | 8  | 1.2  | 160 | 348 | 280 | 1010 | 7    | 3   | 2.7 |
| 2020 | 4 | 3 | 9  | -0.5 | 219 | 504 | 489 | 1010 | 10.7 | 1   | 3.3 |
| 2020 | 4 | 3 | 10 | -1.1 | 257 | 602 | 671 | 1010 | 13.1 | 357 | 3.3 |
| 2020 | 4 | 3 | 11 | -0.2 | 275 | 661 | 803 | 1009 | 14.6 | 350 | 2.9 |
| 2020 | 4 | 3 | 12 | 0.8  | 223 | 784 | 897 | 1009 | 15.8 | 338 | 2.8 |
| 2020 | 4 | 3 | 13 | 1.6  | 231 | 774 | 901 | 1008 | 16.4 | 324 | 2.9 |
| 2020 | 4 | 3 | 14 | 2.2  | 234 | 733 | 832 | 1008 | 16.5 | 313 | 3.4 |
| 2020 | 4 | 3 | 15 | 2.4  | 217 | 688 | 709 | 1007 | 16   | 308 | 3.9 |
| 2020 | 4 | 3 | 16 | 2.2  | 196 | 593 | 532 | 1007 | 14.8 | 310 | 4.1 |
| 2020 | 4 | 3 | 17 | 2.3  | 153 | 451 | 327 | 1007 | 12.7 | 314 | 3.8 |
| 2020 | 4 | 3 | 18 | 3.5  | 79  | 225 | 121 | 1008 | 9    | 316 | 2.3 |
| 2020 | 4 | 3 | 19 | 3.1  | 0   | 0   | 0   | 1008 | 6.3  | 319 | 1.9 |
| 2020 | 4 | 3 | 20 | 2.8  | 0   | 0   | 0   | 1009 | 5.2  | 321 | 1.6 |
| 2020 | 4 | 3 | 21 | 2.3  | 0   | 0   | 0   | 1009 | 4.3  | 322 | 1.3 |
| 2020 | 4 | 3 | 22 | 1.8  | 0   | 0   | 0   | 1009 | 3.8  | 316 | 1.2 |
| 2020 | 4 | 3 | 23 | 1.6  | 0   | 0   | 0   | 1009 | 3.5  | 304 | 1.2 |
| 2020 | 4 | 4 | 0  | 1.8  | 0   | 0   | 0   | 1008 | 3    | 291 | 1.2 |
| 2020 | 4 | 4 | 1  | 2.4  | 0   | 0   | 0   | 1008 | 2.4  | 279 | 1.3 |
| 2020 | 4 | 4 | 2  | 1.9  | 0   | 0   | 0   | 1008 | 1.9  | 271 | 1.3 |
| 2020 | 4 | 4 | 3  | 1.5  | 0   | 0   | 0   | 1008 | 1.5  | 270 | 1.3 |
| 2020 | 4 | 4 | 4  | 1.3  | 0   | 0   | 0   | 1007 | 1.3  | 273 | 1.3 |
| 2020 | 4 | 4 | 5  | 1.3  | 0   | 0   | 0   | 1007 | 1.3  | 276 | 1.4 |
| 2020 | 4 | 4 | 6  | 2.4  | 0   | 0   | 0   | 1007 | 2.4  | 279 | 1.4 |
| 2020 | 4 | 4 | 7  | 5.8  | 60  | 206 | 90  | 1008 | 6.6  | 283 | 2.8 |
| 2020 | 4 | 4 | 8  | 6    | 127 | 490 | 299 | 1008 | 9.9  | 286 | 4   |
| 2020 | 4 | 4 | 9  | 6.1  | 173 | 620 | 507 | 1007 | 12.6 | 293 | 5.3 |
| 2020 | 4 | 4 | 10 | 6.9  | 208 | 689 | 685 | 1007 | 14   | 299 | 5.8 |
| 2020 | 4 | 4 | 11 | 6.5  | 211 | 766 | 826 | 1007 | 14.7 | 309 | 6   |
| 2020 | 4 | 4 | 12 | 4.1  | 193 | 837 | 916 | 1007 | 14.5 | 316 | 6.4 |
| 2020 | 4 | 4 | 13 | 0.6  | 168 | 893 | 944 | 1007 | 13.7 | 318 | 6.8 |
| 2020 | 4 | 4 | 14 | -1.4 | 151 | 908 | 894 | 1007 | 12.5 | 318 | 6.9 |
| 2020 | 4 | 4 | 15 | -2.1 | 139 | 877 | 769 | 1007 | 11.2 | 320 | 6.9 |

|      |   |   |    |      |     |     |     |      |      |     |     |
|------|---|---|----|------|-----|-----|-----|------|------|-----|-----|
| 2020 | 4 | 4 | 16 | -2.4 | 125 | 806 | 586 | 1007 | 9.8  | 322 | 6.8 |
| 2020 | 4 | 4 | 17 | -2.3 | 105 | 669 | 366 | 1007 | 8.1  | 325 | 6.5 |
| 2020 | 4 | 4 | 18 | -1.9 | 66  | 399 | 141 | 1007 | 5.8  | 326 | 5.2 |
| 2020 | 4 | 4 | 19 | -1.1 | 0   | 0   | 0   | 1008 | 4.1  | 326 | 4.3 |
| 2020 | 4 | 4 | 20 | -0.9 | 0   | 0   | 0   | 1008 | 3.5  | 328 | 4.1 |
| 2020 | 4 | 4 | 21 | -0.8 | 0   | 0   | 0   | 1009 | 3    | 330 | 3.8 |
| 2020 | 4 | 4 | 22 | -0.7 | 0   | 0   | 0   | 1009 | 2.5  | 332 | 3.2 |
| 2020 | 4 | 4 | 23 | -0.7 | 0   | 0   | 0   | 1009 | 1.7  | 333 | 2.6 |
| 2020 | 4 | 5 | 0  | -0.8 | 0   | 0   | 0   | 1009 | 1.1  | 336 | 2.3 |
| 2020 | 4 | 5 | 1  | -0.9 | 0   | 0   | 0   | 1010 | 0.8  | 340 | 2.3 |
| 2020 | 4 | 5 | 2  | -0.9 | 0   | 0   | 0   | 1010 | 0.5  | 343 | 2.3 |
| 2020 | 4 | 5 | 3  | -0.8 | 0   | 0   | 0   | 1010 | 0    | 347 | 2.2 |
| 2020 | 4 | 5 | 4  | -0.9 | 0   | 0   | 0   | 1010 | -0.6 | 351 | 2.1 |
| 2020 | 4 | 5 | 5  | -1.3 | 0   | 0   | 0   | 1010 | -1.3 | 356 | 2   |
| 2020 | 4 | 5 | 6  | -1.6 | 0   | 0   | 0   | 1011 | -1.3 | 359 | 1.8 |
| 2020 | 4 | 5 | 7  | -1.2 | 51  | 410 | 112 | 1011 | 1.9  | 360 | 3   |
| 2020 | 4 | 5 | 8  | -3.6 | 88  | 710 | 340 | 1011 | 5.3  | 358 | 3.8 |
| 2020 | 4 | 5 | 9  | -5.4 | 109 | 831 | 560 | 1011 | 7.9  | 356 | 4.1 |
| 2020 | 4 | 5 | 10 | -4.6 | 124 | 901 | 751 | 1011 | 9.6  | 349 | 3.9 |
| 2020 | 4 | 5 | 11 | -3.7 | 135 | 938 | 891 | 1011 | 11.1 | 336 | 3.8 |
| 2020 | 4 | 5 | 12 | -2.9 | 143 | 939 | 956 | 1011 | 12.2 | 328 | 4.2 |
| 2020 | 4 | 5 | 13 | -2.5 | 145 | 937 | 962 | 1010 | 12.6 | 324 | 4.7 |
| 2020 | 4 | 5 | 14 | -2.5 | 141 | 922 | 898 | 1010 | 12.4 | 325 | 5   |
| 2020 | 4 | 5 | 15 | -2.8 | 139 | 871 | 766 | 1009 | 11.8 | 329 | 5.1 |
| 2020 | 4 | 5 | 16 | -3   | 128 | 791 | 582 | 1009 | 10.6 | 332 | 4.8 |
| 2020 | 4 | 5 | 17 | -2.7 | 105 | 671 | 368 | 1009 | 8.8  | 332 | 4.4 |
| 2020 | 4 | 5 | 18 | -1   | 68  | 392 | 142 | 1009 | 5.4  | 331 | 2.7 |
| 2020 | 4 | 5 | 19 | -0.4 | 0   | 0   | 0   | 1010 | 2.9  | 332 | 2.1 |
| 2020 | 4 | 5 | 20 | -0.2 | 0   | 0   | 0   | 1010 | 2.4  | 335 | 2   |
| 2020 | 4 | 5 | 21 | -0.3 | 0   | 0   | 0   | 1011 | 1.6  | 340 | 1.7 |
| 2020 | 4 | 5 | 22 | -1   | 0   | 0   | 0   | 1010 | 0.6  | 343 | 1.4 |
| 2020 | 4 | 5 | 23 | -1.3 | 0   | 0   | 0   | 1010 | -0.2 | 347 | 1.3 |
| 2020 | 4 | 6 | 0  | -1.4 | 0   | 0   | 0   | 1010 | -0.7 | 350 | 1.2 |
| 2020 | 4 | 6 | 1  | -1.4 | 0   | 0   | 0   | 1010 | -1.1 | 352 | 1.3 |
| 2020 | 4 | 6 | 2  | -1.6 | 0   | 0   | 0   | 1010 | -1.6 | 354 | 1.3 |
| 2020 | 4 | 6 | 3  | -2.1 | 0   | 0   | 0   | 1010 | -2.1 | 356 | 1.3 |
| 2020 | 4 | 6 | 4  | -2.5 | 0   | 0   | 0   | 1010 | -2.5 | 5   | 1.4 |
| 2020 | 4 | 6 | 5  | -2.7 | 0   | 0   | 0   | 1010 | -2.7 | 12  | 1.3 |
| 2020 | 4 | 6 | 6  | -2.1 | 0   | 0   | 0   | 1010 | -2.1 | 14  | 1.2 |
| 2020 | 4 | 6 | 7  | -1.1 | 62  | 286 | 106 | 1010 | 1.7  | 19  | 2.1 |
| 2020 | 4 | 6 | 8  | -0.5 | 111 | 593 | 325 | 1010 | 4.7  | 17  | 2   |
| 2020 | 4 | 6 | 9  | -2.6 | 129 | 765 | 548 | 1010 | 9.3  | 13  | 2.3 |
| 2020 | 4 | 6 | 10 | -2.3 | 176 | 780 | 723 | 1010 | 11.9 | 13  | 2.5 |
| 2020 | 4 | 6 | 11 | -1.6 | 205 | 804 | 856 | 1009 | 13.3 | 10  | 2.3 |
| 2020 | 4 | 6 | 12 | -0.7 | 209 | 825 | 927 | 1008 | 14.2 | 359 | 2   |
| 2020 | 4 | 6 | 13 | 0    | 217 | 809 | 924 | 1008 | 14.8 | 343 | 2   |
| 2020 | 4 | 6 | 14 | 0.4  | 220 | 773 | 858 | 1007 | 14.8 | 330 | 2.2 |
| 2020 | 4 | 6 | 15 | 0.8  | 320 | 327 | 557 | 1006 | 14   | 325 | 2.4 |
| 2020 | 4 | 6 | 16 | 1.8  | 230 | 359 | 437 | 1006 | 12.9 | 321 | 2.4 |
| 2020 | 4 | 6 | 17 | 3.5  | 155 | 252 | 254 | 1006 | 11   | 316 | 2.2 |

|      |   |   |    |      |     |     |     |      |      |     |     |
|------|---|---|----|------|-----|-----|-----|------|------|-----|-----|
| 2020 | 4 | 6 | 18 | 3.7  | 65  | 4   | 66  | 1006 | 8.4  | 315 | 1.9 |
| 2020 | 4 | 6 | 19 | 3    | 0   | 0   | 0   | 1007 | 6.7  | 321 | 1.8 |
| 2020 | 4 | 6 | 20 | 2.7  | 0   | 0   | 0   | 1007 | 5.9  | 329 | 1.6 |
| 2020 | 4 | 6 | 21 | 2.5  | 0   | 0   | 0   | 1007 | 5.3  | 340 | 1.4 |
| 2020 | 4 | 6 | 22 | 2.4  | 0   | 0   | 0   | 1007 | 4.9  | 345 | 1.4 |
| 2020 | 4 | 6 | 23 | 2.3  | 0   | 0   | 0   | 1006 | 4.6  | 345 | 1.4 |
| 2020 | 4 | 7 | 0  | 2.3  | 0   | 0   | 0   | 1006 | 4.3  | 346 | 1.4 |
| 2020 | 4 | 7 | 1  | 1.9  | 0   | 0   | 0   | 1006 | 3.5  | 343 | 1.3 |
| 2020 | 4 | 7 | 2  | 1.9  | 0   | 0   | 0   | 1005 | 3.1  | 339 | 1.2 |
| 2020 | 4 | 7 | 3  | 2.3  | 0   | 0   | 0   | 1005 | 3.3  | 333 | 1.2 |
| 2020 | 4 | 7 | 4  | 2.6  | 0   | 0   | 0   | 1006 | 3.2  | 331 | 1.1 |
| 2020 | 4 | 7 | 5  | 2.9  | 0   | 0   | 0   | 1006 | 3    | 330 | 1.1 |
| 2020 | 4 | 7 | 6  | 2.7  | 0   | 0   | 0   | 1006 | 2.7  | 327 | 1.1 |
| 2020 | 4 | 7 | 7  | 4.2  | 64  | 110 | 82  | 1006 | 5.9  | 323 | 1.5 |
| 2020 | 4 | 7 | 8  | 3.4  | 168 | 317 | 283 | 1006 | 8.9  | 314 | 2.3 |
| 2020 | 4 | 7 | 9  | 2.1  | 229 | 483 | 495 | 1006 | 11.7 | 306 | 3   |
| 2020 | 4 | 7 | 10 | 1.7  | 263 | 581 | 672 | 1005 | 13.9 | 302 | 3.3 |
| 2020 | 4 | 7 | 11 | 2.5  | 297 | 613 | 796 | 1005 | 15.6 | 303 | 3.3 |
| 2020 | 4 | 7 | 12 | 3.6  | 284 | 682 | 879 | 1004 | 16.9 | 299 | 3.7 |
| 2020 | 4 | 7 | 13 | 3.9  | 298 | 658 | 875 | 1004 | 17.5 | 292 | 4   |
| 2020 | 4 | 7 | 14 | 3.7  | 288 | 635 | 814 | 1003 | 17.4 | 285 | 4.2 |
| 2020 | 4 | 7 | 15 | 3.5  | 257 | 603 | 695 | 1003 | 16.9 | 278 | 4.2 |
| 2020 | 4 | 7 | 16 | 3.3  | 223 | 523 | 525 | 1003 | 15.7 | 273 | 4.1 |
| 2020 | 4 | 7 | 17 | 4.3  | 163 | 396 | 321 | 1003 | 13.6 | 269 | 3.3 |
| 2020 | 4 | 7 | 18 | 6.1  | 80  | 193 | 117 | 1003 | 10   | 268 | 1.8 |
| 2020 | 4 | 7 | 19 | 5.8  | 0   | 0   | 0   | 1004 | 7.4  | 268 | 1.5 |
| 2020 | 4 | 7 | 20 | 6.5  | 0   | 0   | 0   | 1004 | 6.5  | 269 | 1.4 |
| 2020 | 4 | 7 | 21 | 5.8  | 0   | 0   | 0   | 1004 | 5.8  | 273 | 1.3 |
| 2020 | 4 | 7 | 22 | 6    | 0   | 0   | 0   | 1004 | 6    | 282 | 1.5 |
| 2020 | 4 | 7 | 23 | 6.8  | 0   | 0   | 0   | 1004 | 6.8  | 296 | 1.9 |
| 2020 | 4 | 8 | 0  | 6.9  | 0   | 0   | 0   | 1004 | 7.2  | 313 | 2.7 |
| 2020 | 4 | 8 | 1  | 6    | 0   | 0   | 0   | 1004 | 6    | 325 | 2.2 |
| 2020 | 4 | 8 | 2  | 4.4  | 0   | 0   | 0   | 1004 | 4.4  | 332 | 1.7 |
| 2020 | 4 | 8 | 3  | 3.6  | 0   | 0   | 0   | 1004 | 3.6  | 334 | 1.6 |
| 2020 | 4 | 8 | 4  | 3.2  | 0   | 0   | 0   | 1004 | 3.2  | 332 | 1.6 |
| 2020 | 4 | 8 | 5  | 2.8  | 0   | 0   | 0   | 1004 | 2.8  | 330 | 1.6 |
| 2020 | 4 | 8 | 6  | 3.5  | 0   | 0   | 0   | 1005 | 3.5  | 332 | 1.5 |
| 2020 | 4 | 8 | 7  | 4.8  | 69  | 181 | 99  | 1006 | 6.2  | 333 | 2.8 |
| 2020 | 4 | 8 | 8  | 3.4  | 140 | 449 | 306 | 1006 | 8.9  | 334 | 3.4 |
| 2020 | 4 | 8 | 9  | -0.1 | 171 | 637 | 525 | 1006 | 11.7 | 334 | 4.8 |
| 2020 | 4 | 8 | 10 | -0.9 | 189 | 734 | 708 | 1006 | 13.2 | 333 | 5.1 |
| 2020 | 4 | 8 | 11 | -1.1 | 222 | 749 | 834 | 1006 | 14.1 | 331 | 5.2 |
| 2020 | 4 | 8 | 12 | -1.1 | 310 | 645 | 875 | 1006 | 14.6 | 328 | 5.4 |
| 2020 | 4 | 8 | 13 | -1.3 | 316 | 639 | 879 | 1006 | 14.7 | 325 | 5.5 |
| 2020 | 4 | 8 | 14 | -1.7 | 312 | 612 | 820 | 1006 | 14.5 | 324 | 5.5 |
| 2020 | 4 | 8 | 15 | -2.3 | 295 | 549 | 695 | 1006 | 13.6 | 324 | 5.3 |
| 2020 | 4 | 8 | 16 | -2.7 | 243 | 491 | 528 | 1006 | 12.4 | 326 | 5   |
| 2020 | 4 | 8 | 17 | -2.5 | 175 | 389 | 331 | 1007 | 10.8 | 328 | 4.3 |
| 2020 | 4 | 8 | 18 | 0.3  | 87  | 198 | 126 | 1007 | 7.7  | 326 | 2.5 |
| 2020 | 4 | 8 | 19 | 1.1  | 0   | 0   | 0   | 1008 | 5.2  | 327 | 2.1 |

|      |   |    |    |      |     |     |     |      |      |     |     |
|------|---|----|----|------|-----|-----|-----|------|------|-----|-----|
| 2020 | 4 | 8  | 20 | 1.9  | 0   | 0   | 0   | 1009 | 4.5  | 332 | 2.1 |
| 2020 | 4 | 8  | 21 | 2.1  | 0   | 0   | 0   | 1009 | 3.8  | 337 | 1.8 |
| 2020 | 4 | 8  | 22 | 1.9  | 0   | 0   | 0   | 1009 | 3.1  | 340 | 1.6 |
| 2020 | 4 | 8  | 23 | 1.6  | 0   | 0   | 0   | 1009 | 2.5  | 344 | 1.5 |
| 2020 | 4 | 9  | 0  | 1.3  | 0   | 0   | 0   | 1009 | 2.2  | 347 | 1.5 |
| 2020 | 4 | 9  | 1  | 1.2  | 0   | 0   | 0   | 1009 | 1.9  | 347 | 1.5 |
| 2020 | 4 | 9  | 2  | 1.1  | 0   | 0   | 0   | 1009 | 1.5  | 345 | 1.5 |
| 2020 | 4 | 9  | 3  | 1.1  | 0   | 0   | 0   | 1009 | 1.1  | 343 | 1.4 |
| 2020 | 4 | 9  | 4  | 0.8  | 0   | 0   | 0   | 1009 | 0.8  | 342 | 1.4 |
| 2020 | 4 | 9  | 5  | 0.7  | 0   | 0   | 0   | 1009 | 0.7  | 341 | 1.4 |
| 2020 | 4 | 9  | 6  | 1.4  | 0   | 0   | 0   | 1010 | 1.4  | 340 | 1.2 |
| 2020 | 4 | 9  | 7  | 2.9  | 73  | 162 | 100 | 1010 | 5.2  | 337 | 1.9 |
| 2020 | 4 | 9  | 8  | 1.4  | 164 | 373 | 303 | 1010 | 8.4  | 335 | 2.9 |
| 2020 | 4 | 9  | 9  | 0    | 224 | 507 | 507 | 1010 | 10.5 | 330 | 3.8 |
| 2020 | 4 | 9  | 10 | 0    | 266 | 587 | 684 | 1010 | 11.9 | 327 | 4.5 |
| 2020 | 4 | 9  | 11 | 0.1  | 301 | 627 | 816 | 1010 | 12.8 | 325 | 4.7 |
| 2020 | 4 | 9  | 12 | 0.2  | 337 | 617 | 880 | 1009 | 13.5 | 321 | 4.8 |
| 2020 | 4 | 9  | 13 | 0.2  | 342 | 609 | 880 | 1009 | 13.7 | 317 | 4.9 |
| 2020 | 4 | 9  | 14 | 0    | 348 | 556 | 810 | 1009 | 13.5 | 314 | 4.8 |
| 2020 | 4 | 9  | 15 | -0.2 | 339 | 470 | 682 | 1009 | 12.9 | 314 | 4.7 |
| 2020 | 4 | 9  | 16 | -0.3 | 294 | 369 | 510 | 1009 | 11.7 | 317 | 4.8 |
| 2020 | 4 | 9  | 17 | 0    | 211 | 237 | 306 | 1010 | 10   | 322 | 4.3 |
| 2020 | 4 | 9  | 18 | 1.6  | 90  | 93  | 108 | 1010 | 7.5  | 324 | 2.7 |
| 2020 | 4 | 9  | 19 | 2.3  | 0   | 0   | 0   | 1010 | 5.4  | 328 | 1.9 |
| 2020 | 4 | 9  | 20 | 2.3  | 0   | 0   | 0   | 1011 | 4.6  | 332 | 1.9 |
| 2020 | 4 | 9  | 21 | 2.7  | 0   | 0   | 0   | 1012 | 4.8  | 336 | 2   |
| 2020 | 4 | 9  | 22 | 3    | 0   | 0   | 0   | 1012 | 4.9  | 338 | 2   |
| 2020 | 4 | 9  | 23 | 3.2  | 0   | 0   | 0   | 1012 | 4.9  | 342 | 1.8 |
| 2020 | 4 | 10 | 0  | 3.3  | 0   | 0   | 0   | 1012 | 4.9  | 343 | 1.8 |
| 2020 | 4 | 10 | 1  | 3.1  | 0   | 0   | 0   | 1012 | 4.4  | 344 | 1.6 |
| 2020 | 4 | 10 | 2  | 2.9  | 0   | 0   | 0   | 1012 | 3.9  | 349 | 1.4 |
| 2020 | 4 | 10 | 3  | 2.8  | 0   | 0   | 0   | 1012 | 3.7  | 355 | 1.2 |
| 2020 | 4 | 10 | 4  | 2.4  | 0   | 0   | 0   | 1012 | 3.1  | 13  | 1   |
| 2020 | 4 | 10 | 5  | 2.1  | 0   | 0   | 0   | 1012 | 2.7  | 35  | 0.9 |
| 2020 | 4 | 10 | 6  | 2.1  | 0   | 0   | 0   | 1012 | 2.7  | 56  | 0.9 |
| 2020 | 4 | 10 | 7  | 2.8  | 77  | 111 | 97  | 1012 | 5.4  | 76  | 1.6 |
| 2020 | 4 | 10 | 8  | 2.6  | 154 | 146 | 209 | 1013 | 8.5  | 104 | 1.7 |
| 2020 | 4 | 10 | 9  | 2.6  | 245 | 87  | 294 | 1013 | 10.9 | 135 | 1.3 |
| 2020 | 4 | 10 | 10 | 3.2  | 337 | 213 | 489 | 1013 | 12.7 | 176 | 1   |
| 2020 | 4 | 10 | 11 | 3.9  | 405 | 134 | 515 | 1012 | 14.2 | 197 | 1.2 |
| 2020 | 4 | 10 | 12 | 4.6  | 373 | 565 | 872 | 1011 | 15.2 | 205 | 1.7 |
| 2020 | 4 | 10 | 13 | 5    | 447 | 189 | 615 | 1011 | 15.8 | 210 | 2   |
| 2020 | 4 | 10 | 14 | 5.2  | 350 | 38  | 382 | 1010 | 16   | 219 | 2   |
| 2020 | 4 | 10 | 15 | 5.1  | 351 | 175 | 479 | 1010 | 15.8 | 228 | 2.3 |
| 2020 | 4 | 10 | 16 | 4.7  | 117 | 0   | 117 | 1010 | 15.1 | 251 | 2.5 |
| 2020 | 4 | 10 | 17 | 4.9  | 160 | 52  | 181 | 1010 | 13.3 | 275 | 2   |
| 2020 | 4 | 10 | 18 | 5.6  | 35  | 0   | 35  | 1010 | 10.6 | 299 | 1.7 |
| 2020 | 4 | 10 | 19 | 5    | 0   | 0   | 0   | 1011 | 7.7  | 314 | 1.4 |
| 2020 | 4 | 10 | 20 | 4.1  | 0   | 0   | 0   | 1012 | 6    | 327 | 1.3 |
| 2020 | 4 | 10 | 21 | 3.9  | 0   | 0   | 0   | 1012 | 5.3  | 345 | 1   |



|      |   |    |    |     |     |     |     |      |      |     |     |
|------|---|----|----|-----|-----|-----|-----|------|------|-----|-----|
| 2020 | 4 | 10 | 22 | 4   | 0   | 0   | 0   | 1011 | 5.5  | 5   | 0.9 |
| 2020 | 4 | 10 | 23 | 3.8 | 0   | 0   | 0   | 1011 | 5.2  | 17  | 0.8 |
| 2020 | 4 | 11 | 0  | 2.7 | 0   | 0   | 0   | 1011 | 4    | 18  | 0.9 |
| 2020 | 4 | 11 | 1  | 2.4 | 0   | 0   | 0   | 1011 | 3.7  | 22  | 1   |
| 2020 | 4 | 11 | 2  | 2.2 | 0   | 0   | 0   | 1010 | 3.3  | 24  | 1   |
| 2020 | 4 | 11 | 3  | 2.2 | 0   | 0   | 0   | 1010 | 2.9  | 13  | 1   |
| 2020 | 4 | 11 | 4  | 2.5 | 0   | 0   | 0   | 1010 | 3.4  | 1   | 1   |
| 2020 | 4 | 11 | 5  | 2.6 | 0   | 0   | 0   | 1010 | 3.5  | 358 | 1.1 |
| 2020 | 4 | 11 | 6  | 2.9 | 0   | 0   | 0   | 1010 | 3.9  | 2   | 1.1 |
| 2020 | 4 | 11 | 7  | 3.2 | 27  | 0   | 27  | 1009 | 5.2  | 1   | 1.9 |
| 2020 | 4 | 11 | 8  | 3   | 28  | 0   | 28  | 1009 | 6.3  | 352 | 1.6 |
| 2020 | 4 | 11 | 9  | 2.4 | 172 | 3   | 174 | 1009 | 7.5  | 334 | 0.9 |
| 2020 | 4 | 11 | 10 | 2.7 | 287 | 33  | 311 | 1009 | 8    | 298 | 0.8 |
| 2020 | 4 | 11 | 11 | 3.5 | 305 | 22  | 324 | 1009 | 8.5  | 301 | 1   |
| 2020 | 4 | 11 | 12 | 4.2 | 268 | 14  | 280 | 1008 | 8.8  | 313 | 1.7 |
| 2020 | 4 | 11 | 13 | 4.6 | 367 | 34  | 397 | 1007 | 8.8  | 326 | 2.2 |
| 2020 | 4 | 11 | 14 | 4.8 | 302 | 21  | 319 | 1007 | 8.7  | 333 | 2.5 |
| 2020 | 4 | 11 | 15 | 4.9 | 93  | 0   | 93  | 1006 | 8.4  | 336 | 2.7 |
| 2020 | 4 | 11 | 16 | 4.8 | 91  | 0   | 91  | 1006 | 7.8  | 342 | 3   |
| 2020 | 4 | 11 | 17 | 4.6 | 72  | 0   | 72  | 1006 | 6.9  | 347 | 3   |
| 2020 | 4 | 11 | 18 | 4.5 | 9   | 0   | 9   | 1005 | 5.8  | 352 | 2.4 |
| 2020 | 4 | 11 | 19 | 4.2 | 0   | 0   | 0   | 1005 | 4.9  | 360 | 1.8 |
| 2020 | 4 | 11 | 20 | 3.8 | 0   | 0   | 0   | 1005 | 4.5  | 12  | 1.7 |
| 2020 | 4 | 11 | 21 | 3.5 | 0   | 0   | 0   | 1005 | 4.1  | 25  | 1.6 |
| 2020 | 4 | 11 | 22 | 3.2 | 0   | 0   | 0   | 1004 | 3.8  | 33  | 1.5 |
| 2020 | 4 | 11 | 23 | 3.1 | 0   | 0   | 0   | 1003 | 3.7  | 37  | 1.4 |
| 2020 | 4 | 12 | 0  | 2.9 | 0   | 0   | 0   | 1003 | 3.3  | 34  | 1.4 |
| 2020 | 4 | 12 | 1  | 2.6 | 0   | 0   | 0   | 1002 | 2.8  | 22  | 1.3 |
| 2020 | 4 | 12 | 2  | 2.8 | 0   | 0   | 0   | 1002 | 3.2  | 11  | 1.3 |
| 2020 | 4 | 12 | 3  | 2.9 | 0   | 0   | 0   | 1001 | 3.4  | 5   | 1.8 |
| 2020 | 4 | 12 | 4  | 2.8 | 0   | 0   | 0   | 1001 | 3.4  | 2   | 2.2 |
| 2020 | 4 | 12 | 5  | 2.5 | 0   | 0   | 0   | 1001 | 3.1  | 2   | 2.4 |
| 2020 | 4 | 12 | 6  | 2.4 | 0   | 0   | 0   | 1000 | 3    | 3   | 2.6 |
| 2020 | 4 | 12 | 7  | 2.9 | 64  | 23  | 68  | 1000 | 4.2  | 4   | 3.1 |
| 2020 | 4 | 12 | 8  | 3.3 | 192 | 301 | 308 | 1000 | 6.4  | 7   | 3.4 |
| 2020 | 4 | 12 | 9  | 3.3 | 214 | 25  | 228 | 999  | 9.1  | 15  | 3.9 |
| 2020 | 4 | 12 | 10 | 3.6 | 345 | 162 | 462 | 999  | 11.4 | 27  | 4   |
| 2020 | 4 | 12 | 11 | 3.9 | 327 | 465 | 713 | 999  | 12.4 | 37  | 3.9 |
| 2020 | 4 | 12 | 12 | 4.2 | 415 | 343 | 720 | 998  | 12.4 | 43  | 3.7 |
| 2020 | 4 | 12 | 13 | 4.6 | 425 | 74  | 491 | 998  | 11.9 | 46  | 3.6 |
| 2020 | 4 | 12 | 14 | 5   | 143 | 1   | 143 | 998  | 11.3 | 45  | 3.6 |
| 2020 | 4 | 12 | 15 | 5.2 | 217 | 9   | 224 | 998  | 10.8 | 43  | 3.4 |
| 2020 | 4 | 12 | 16 | 5.4 | 211 | 17  | 221 | 998  | 10.4 | 38  | 2.9 |
| 2020 | 4 | 12 | 17 | 6.4 | 108 | 0   | 108 | 998  | 10   | 26  | 1.7 |
| 2020 | 4 | 12 | 18 | 6.6 | 12  | 0   | 12  | 998  | 8.5  | 10  | 1   |
| 2020 | 4 | 12 | 19 | 5   | 0   | 0   | 0   | 999  | 6.8  | 12  | 1.2 |
| 2020 | 4 | 12 | 20 | 4   | 0   | 0   | 0   | 1000 | 5.7  | 23  | 1.4 |
| 2020 | 4 | 12 | 21 | 3.2 | 0   | 0   | 0   | 1000 | 4.8  | 28  | 1.5 |
| 2020 | 4 | 12 | 22 | 2.4 | 0   | 0   | 0   | 1000 | 4    | 25  | 1.6 |
| 2020 | 4 | 12 | 23 | 1.8 | 0   | 0   | 0   | 1000 | 3.2  | 18  | 1.5 |

|      |   |    |    |      |     |     |     |      |      |     |     |
|------|---|----|----|------|-----|-----|-----|------|------|-----|-----|
| 2020 | 4 | 13 | 0  | 1.7  | 0   | 0   | 0   | 1000 | 2.6  | 12  | 1.6 |
| 2020 | 4 | 13 | 1  | 1.8  | 0   | 0   | 0   | 1000 | 2.2  | 10  | 1.8 |
| 2020 | 4 | 13 | 2  | 1.8  | 0   | 0   | 0   | 999  | 1.8  | 9   | 2   |
| 2020 | 4 | 13 | 3  | 1.3  | 0   | 0   | 0   | 999  | 1.3  | 8   | 2   |
| 2020 | 4 | 13 | 4  | 0.6  | 0   | 0   | 0   | 999  | 0.6  | 5   | 1.8 |
| 2020 | 4 | 13 | 5  | 1.3  | 0   | 0   | 0   | 999  | 1.3  | 2   | 2.5 |
| 2020 | 4 | 13 | 6  | 1.5  | 0   | 0   | 0   | 1000 | 1.9  | 357 | 3.3 |
| 2020 | 4 | 13 | 7  | 1.8  | 68  | 386 | 140 | 1001 | 3    | 353 | 3.8 |
| 2020 | 4 | 13 | 8  | 1.2  | 96  | 695 | 367 | 1001 | 5.6  | 352 | 4.7 |
| 2020 | 4 | 13 | 9  | -0.8 | 110 | 828 | 586 | 1001 | 7.9  | 355 | 5.4 |
| 2020 | 4 | 13 | 10 | -1.7 | 120 | 894 | 769 | 1001 | 9.1  | 359 | 5.4 |
| 2020 | 4 | 13 | 11 | -1.5 | 247 | 668 | 804 | 1001 | 10.8 | 1   | 5.3 |
| 2020 | 4 | 13 | 12 | -1.1 | 422 | 327 | 713 | 1001 | 12   | 359 | 5.2 |
| 2020 | 4 | 13 | 13 | -0.8 | 364 | 477 | 790 | 1001 | 12.7 | 352 | 5.1 |
| 2020 | 4 | 13 | 14 | -0.2 | 319 | 516 | 754 | 1000 | 13.3 | 344 | 5.4 |
| 2020 | 4 | 13 | 15 | 0.7  | 144 | 853 | 776 | 1000 | 13.4 | 340 | 5.6 |
| 2020 | 4 | 13 | 16 | 1.5  | 139 | 755 | 587 | 1001 | 13   | 336 | 5.5 |
| 2020 | 4 | 13 | 17 | 2.4  | 118 | 615 | 372 | 1001 | 11.8 | 328 | 4.9 |
| 2020 | 4 | 13 | 18 | 3.3  | 77  | 360 | 153 | 1002 | 9.3  | 320 | 3.7 |
| 2020 | 4 | 13 | 19 | 3.7  | 0   | 0   | 0   | 1002 | 6.4  | 319 | 2.9 |
| 2020 | 4 | 13 | 20 | 3.9  | 0   | 0   | 0   | 1003 | 5.3  | 325 | 2.4 |
| 2020 | 4 | 13 | 21 | 3.9  | 0   | 0   | 0   | 1004 | 4.4  | 328 | 2   |
| 2020 | 4 | 13 | 22 | 3.5  | 0   | 0   | 0   | 1004 | 3.5  | 326 | 1.6 |
| 2020 | 4 | 13 | 23 | 2.9  | 0   | 0   | 0   | 1005 | 2.9  | 322 | 1.3 |
| 2020 | 4 | 14 | 0  | 2.5  | 0   | 0   | 0   | 1005 | 2.5  | 318 | 1.3 |
| 2020 | 4 | 14 | 1  | 2.6  | 0   | 0   | 0   | 1005 | 2.6  | 318 | 1.2 |
| 2020 | 4 | 14 | 2  | 3    | 0   | 0   | 0   | 1005 | 3    | 325 | 0.9 |
| 2020 | 4 | 14 | 3  | 3.6  | 0   | 0   | 0   | 1005 | 3.6  | 336 | 1.2 |
| 2020 | 4 | 14 | 4  | 3.8  | 0   | 0   | 0   | 1005 | 3.9  | 339 | 1.4 |
| 2020 | 4 | 14 | 5  | 3.4  | 0   | 0   | 0   | 1005 | 3.7  | 328 | 1.4 |
| 2020 | 4 | 14 | 6  | 3.3  | 0   | 0   | 0   | 1006 | 3.8  | 324 | 1.5 |
| 2020 | 4 | 14 | 7  | 3.8  | 77  | 312 | 136 | 1006 | 4.8  | 330 | 1.5 |
| 2020 | 4 | 14 | 8  | 4.5  | 121 | 589 | 353 | 1006 | 7.8  | 326 | 1.9 |
| 2020 | 4 | 14 | 9  | 4.6  | 151 | 721 | 568 | 1006 | 11.6 | 318 | 2.2 |
| 2020 | 4 | 14 | 10 | 3.1  | 165 | 810 | 755 | 1006 | 15.1 | 307 | 2.6 |
| 2020 | 4 | 14 | 11 | 3    | 169 | 865 | 893 | 1005 | 16.9 | 297 | 2.5 |
| 2020 | 4 | 14 | 12 | 3.2  | 159 | 910 | 974 | 1005 | 18.2 | 286 | 2.6 |
| 2020 | 4 | 14 | 13 | 3.4  | 162 | 907 | 976 | 1004 | 18.9 | 278 | 2.8 |
| 2020 | 4 | 14 | 14 | 3.3  | 169 | 871 | 906 | 1004 | 19.1 | 278 | 2.9 |
| 2020 | 4 | 14 | 15 | 3.1  | 192 | 765 | 760 | 1003 | 18.6 | 280 | 3   |
| 2020 | 4 | 14 | 16 | 2.6  | 180 | 664 | 576 | 1003 | 17.5 | 280 | 3   |
| 2020 | 4 | 14 | 17 | 6.2  | 146 | 523 | 363 | 1003 | 14.9 | 286 | 1.8 |
| 2020 | 4 | 14 | 18 | 7.1  | 77  | 154 | 110 | 1003 | 11.8 | 295 | 1.4 |
| 2020 | 4 | 14 | 19 | 4.9  | 0   | 0   | 0   | 1004 | 8.5  | 300 | 1.4 |
| 2020 | 4 | 14 | 20 | 4.6  | 0   | 0   | 0   | 1004 | 7.7  | 307 | 1.2 |
| 2020 | 4 | 14 | 21 | 4    | 0   | 0   | 0   | 1004 | 7.1  | 319 | 1.1 |
| 2020 | 4 | 14 | 22 | 3.5  | 0   | 0   | 0   | 1004 | 6.8  | 333 | 1.1 |
| 2020 | 4 | 14 | 23 | 3.2  | 0   | 0   | 0   | 1004 | 6.9  | 345 | 1   |
| 2020 | 4 | 15 | 0  | 2.6  | 0   | 0   | 0   | 1004 | 7    | 345 | 0.9 |
| 2020 | 4 | 15 | 1  | 2.2  | 0   | 0   | 0   | 1004 | 6.9  | 332 | 0.8 |

|      |   |    |    |      |     |     |     |      |      |     |     |
|------|---|----|----|------|-----|-----|-----|------|------|-----|-----|
| 2020 | 4 | 15 | 2  | 1.8  | 0   | 0   | 0   | 1003 | 7    | 321 | 0.7 |
| 2020 | 4 | 15 | 3  | 1.5  | 0   | 0   | 0   | 1003 | 7    | 319 | 0.6 |
| 2020 | 4 | 15 | 4  | 1.2  | 0   | 0   | 0   | 1003 | 7    | 324 | 0.4 |
| 2020 | 4 | 15 | 5  | 0.6  | 0   | 0   | 0   | 1003 | 7    | 349 | 0.2 |
| 2020 | 4 | 15 | 6  | -0.1 | 0   | 0   | 0   | 1003 | 7.1  | 61  | 0.3 |
| 2020 | 4 | 15 | 7  | 1.7  | 69  | 169 | 102 | 1003 | 7.8  | 76  | 0.3 |
| 2020 | 4 | 15 | 8  | 0.3  | 154 | 268 | 261 | 1003 | 9    | 74  | 0.4 |
| 2020 | 4 | 15 | 9  | -0.6 | 254 | 244 | 396 | 1003 | 11.1 | 325 | 0.4 |
| 2020 | 4 | 15 | 10 | -1.3 | 303 | 402 | 598 | 1003 | 13.5 | 302 | 1   |
| 2020 | 4 | 15 | 11 | -0.8 | 306 | 548 | 766 | 1003 | 14.6 | 297 | 1.2 |
| 2020 | 4 | 15 | 12 | -0.1 | 339 | 556 | 838 | 1003 | 15.3 | 289 | 1.4 |
| 2020 | 4 | 15 | 13 | 0.7  | 349 | 540 | 834 | 1002 | 15.9 | 285 | 1.6 |
| 2020 | 4 | 15 | 14 | 1.3  | 327 | 495 | 747 | 1002 | 16.1 | 283 | 1.8 |
| 2020 | 4 | 15 | 15 | 2.1  | 265 | 503 | 640 | 1001 | 16   | 284 | 1.8 |
| 2020 | 4 | 15 | 16 | 2.7  | 208 | 474 | 492 | 1001 | 15.5 | 286 | 1.7 |
| 2020 | 4 | 15 | 17 | 4.7  | 169 | 433 | 349 | 1001 | 14.4 | 288 | 1.3 |
| 2020 | 4 | 15 | 18 | 7.5  | 92  | 219 | 139 | 1001 | 11.8 | 291 | 0.9 |
| 2020 | 4 | 15 | 19 | 5.6  | 0   | 0   | 0   | 1002 | 9.7  | 298 | 1.1 |
| 2020 | 4 | 15 | 20 | 5.1  | 0   | 0   | 0   | 1002 | 8.8  | 309 | 1.1 |
| 2020 | 4 | 15 | 21 | 4.7  | 0   | 0   | 0   | 1003 | 8.1  | 325 | 1   |
| 2020 | 4 | 15 | 22 | 4.4  | 0   | 0   | 0   | 1003 | 7.3  | 343 | 1   |
| 2020 | 4 | 15 | 23 | 3.8  | 0   | 0   | 0   | 1003 | 6.4  | 1   | 1.1 |
| 2020 | 4 | 16 | 0  | 3.1  | 0   | 0   | 0   | 1004 | 5.7  | 12  | 1.1 |
| 2020 | 4 | 16 | 1  | 2.4  | 0   | 0   | 0   | 1004 | 5.5  | 26  | 1.1 |
| 2020 | 4 | 16 | 2  | 1.9  | 0   | 0   | 0   | 1003 | 5.2  | 52  | 1.1 |
| 2020 | 4 | 16 | 3  | 1.9  | 0   | 0   | 0   | 1004 | 4.6  | 82  | 1.2 |
| 2020 | 4 | 16 | 4  | 2.7  | 0   | 0   | 0   | 1004 | 3.8  | 102 | 1.3 |
| 2020 | 4 | 16 | 5  | 3.2  | 0   | 0   | 0   | 1004 | 3.2  | 112 | 1.5 |
| 2020 | 4 | 16 | 6  | 4.3  | 0   | 0   | 0   | 1005 | 4.3  | 112 | 2   |
| 2020 | 4 | 16 | 7  | 6.5  | 86  | 206 | 127 | 1005 | 7.9  | 111 | 3.7 |
| 2020 | 4 | 16 | 8  | 7.2  | 157 | 446 | 336 | 1005 | 10.9 | 121 | 4   |
| 2020 | 4 | 16 | 9  | 7.3  | 198 | 591 | 544 | 1006 | 13.6 | 133 | 4.1 |
| 2020 | 4 | 16 | 10 | 6.8  | 225 | 678 | 724 | 1006 | 15.8 | 140 | 4.1 |
| 2020 | 4 | 16 | 11 | 6.6  | 246 | 720 | 853 | 1006 | 17.2 | 141 | 4.2 |
| 2020 | 4 | 16 | 12 | 6.8  | 190 | 848 | 953 | 1005 | 18.2 | 141 | 4.3 |
| 2020 | 4 | 16 | 13 | 6.8  | 193 | 844 | 954 | 1005 | 18.7 | 141 | 4.5 |
| 2020 | 4 | 16 | 14 | 6.7  | 190 | 818 | 885 | 1004 | 18.9 | 144 | 4.5 |
| 2020 | 4 | 16 | 15 | 6.7  | 194 | 743 | 749 | 1004 | 18.6 | 145 | 4.4 |
| 2020 | 4 | 16 | 16 | 6.8  | 187 | 638 | 569 | 1003 | 17.6 | 139 | 4.4 |
| 2020 | 4 | 16 | 17 | 8.2  | 155 | 486 | 359 | 1003 | 15.5 | 137 | 3.4 |
| 2020 | 4 | 16 | 18 | 9.4  | 94  | 238 | 145 | 1003 | 13.1 | 142 | 2.5 |
| 2020 | 4 | 16 | 19 | 9.3  | 0   | 0   | 0   | 1004 | 11.5 | 140 | 2.6 |
| 2020 | 4 | 16 | 20 | 9    | 0   | 0   | 0   | 1005 | 10.9 | 135 | 3.2 |
| 2020 | 4 | 16 | 21 | 8.7  | 0   | 0   | 0   | 1005 | 10.4 | 127 | 4.1 |
| 2020 | 4 | 16 | 22 | 8.4  | 0   | 0   | 0   | 1004 | 9.7  | 122 | 4.5 |
| 2020 | 4 | 16 | 23 | 8.4  | 0   | 0   | 0   | 1005 | 9.1  | 124 | 4.2 |
| 2020 | 4 | 17 | 0  | 8.5  | 0   | 0   | 0   | 1005 | 9.4  | 127 | 4.6 |
| 2020 | 4 | 17 | 1  | 9    | 0   | 0   | 0   | 1004 | 9.9  | 129 | 5.2 |
| 2020 | 4 | 17 | 2  | 9.3  | 0   | 0   | 0   | 1003 | 10   | 125 | 5.1 |
| 2020 | 4 | 17 | 3  | 9.5  | 0   | 0   | 0   | 1002 | 10.1 | 128 | 5.2 |

|      |   |    |    |      |     |     |     |      |      |     |     |
|------|---|----|----|------|-----|-----|-----|------|------|-----|-----|
| 2020 | 4 | 17 | 4  | 9.7  | 0   | 0   | 0   | 1002 | 10.1 | 128 | 3.7 |
| 2020 | 4 | 17 | 5  | 9.9  | 0   | 0   | 0   | 1002 | 10.5 | 127 | 4   |
| 2020 | 4 | 17 | 6  | 10.5 | 0   | 0   | 0   | 1002 | 11.4 | 139 | 4.5 |
| 2020 | 4 | 17 | 7  | 11.6 | 10  | 0   | 10  | 1002 | 12.5 | 150 | 4.7 |
| 2020 | 4 | 17 | 8  | 12.5 | 19  | 0   | 19  | 1002 | 13.6 | 162 | 4.9 |
| 2020 | 4 | 17 | 9  | 12.8 | 84  | 0   | 84  | 1002 | 14.5 | 176 | 5.4 |
| 2020 | 4 | 17 | 10 | 11.8 | 47  | 0   | 47  | 1001 | 15.1 | 181 | 6.2 |
| 2020 | 4 | 17 | 11 | 11.7 | 76  | 0   | 76  | 1001 | 16.3 | 182 | 6.2 |
| 2020 | 4 | 17 | 12 | 12.2 | 422 | 64  | 480 | 1000 | 17.5 | 187 | 5.9 |
| 2020 | 4 | 17 | 13 | 12.8 | 395 | 525 | 870 | 1000 | 17.7 | 194 | 5.4 |
| 2020 | 4 | 17 | 14 | 13.1 | 383 | 499 | 808 | 999  | 16.8 | 201 | 4.4 |
| 2020 | 4 | 17 | 15 | 13.7 | 352 | 452 | 691 | 999  | 16.2 | 209 | 3.3 |
| 2020 | 4 | 17 | 16 | 14.1 | 297 | 381 | 527 | 998  | 16.1 | 224 | 2.7 |
| 2020 | 4 | 17 | 17 | 14.2 | 31  | 0   | 31  | 998  | 16   | 248 | 2.4 |
| 2020 | 4 | 17 | 18 | 13.8 | 104 | 177 | 143 | 998  | 14.6 | 269 | 1.6 |
| 2020 | 4 | 17 | 19 | 12.3 | 0   | 0   | 0   | 998  | 12.3 | 280 | 1.5 |
| 2020 | 4 | 17 | 20 | 10.8 | 0   | 0   | 0   | 999  | 10.8 | 289 | 1.8 |
| 2020 | 4 | 17 | 21 | 9.6  | 0   | 0   | 0   | 999  | 9.6  | 294 | 1.7 |
| 2020 | 4 | 17 | 22 | 8.5  | 0   | 0   | 0   | 999  | 8.5  | 295 | 1.7 |
| 2020 | 4 | 17 | 23 | 8.1  | 0   | 0   | 0   | 1000 | 8.1  | 294 | 2   |
| 2020 | 4 | 18 | 0  | 8.1  | 0   | 0   | 0   | 1000 | 8.1  | 295 | 2.6 |
| 2020 | 4 | 18 | 1  | 8.1  | 0   | 0   | 0   | 1000 | 8.2  | 300 | 3.2 |
| 2020 | 4 | 18 | 2  | 7.9  | 0   | 0   | 0   | 1000 | 8.3  | 304 | 3.6 |
| 2020 | 4 | 18 | 3  | 7.8  | 0   | 0   | 0   | 1001 | 8.3  | 305 | 3.7 |
| 2020 | 4 | 18 | 4  | 7.7  | 0   | 0   | 0   | 1001 | 8.2  | 305 | 3.6 |
| 2020 | 4 | 18 | 5  | 7.5  | 0   | 0   | 0   | 1002 | 8    | 308 | 3.2 |
| 2020 | 4 | 18 | 6  | 7.4  | 0   | 0   | 0   | 1002 | 8    | 316 | 3   |
| 2020 | 4 | 18 | 7  | 7.3  | 75  | 43  | 84  | 1003 | 8.5  | 328 | 3.2 |
| 2020 | 4 | 18 | 8  | 7.3  | 113 | 0   | 113 | 1004 | 9.4  | 333 | 3.3 |
| 2020 | 4 | 18 | 9  | 7.8  | 218 | 562 | 552 | 1004 | 11.6 | 328 | 3.1 |
| 2020 | 4 | 18 | 10 | 7.9  | 235 | 667 | 730 | 1004 | 14   | 322 | 3.3 |
| 2020 | 4 | 18 | 11 | 8.1  | 250 | 718 | 860 | 1004 | 15.8 | 319 | 3.5 |
| 2020 | 4 | 18 | 12 | 8.3  | 185 | 848 | 953 | 1004 | 16.9 | 315 | 3.9 |
| 2020 | 4 | 18 | 13 | 8.4  | 198 | 830 | 951 | 1004 | 17.3 | 316 | 4.2 |
| 2020 | 4 | 18 | 14 | 8.5  | 418 | 244 | 626 | 1004 | 17.2 | 319 | 4.2 |
| 2020 | 4 | 18 | 15 | 8.5  | 194 | 742 | 752 | 1004 | 16.7 | 321 | 3.9 |
| 2020 | 4 | 18 | 16 | 8.4  | 173 | 664 | 574 | 1004 | 16   | 322 | 3.5 |
| 2020 | 4 | 18 | 17 | 8.3  | 141 | 535 | 367 | 1004 | 15   | 318 | 3   |
| 2020 | 4 | 18 | 18 | 8.9  | 80  | 35  | 88  | 1005 | 12.6 | 312 | 2   |
| 2020 | 4 | 18 | 19 | 8.1  | 6   | 9   | 7   | 1005 | 9.5  | 312 | 1.7 |
| 2020 | 4 | 18 | 20 | 7.5  | 0   | 0   | 0   | 1006 | 8.3  | 324 | 1.7 |
| 2020 | 4 | 18 | 21 | 7.3  | 0   | 0   | 0   | 1006 | 7.3  | 337 | 1.5 |
| 2020 | 4 | 18 | 22 | 6.7  | 0   | 0   | 0   | 1006 | 6.7  | 357 | 1.3 |
| 2020 | 4 | 18 | 23 | 7.2  | 0   | 0   | 0   | 1006 | 7.2  | 20  | 1.3 |
| 2020 | 4 | 19 | 0  | 7.3  | 0   | 0   | 0   | 1005 | 7.4  | 48  | 1   |
| 2020 | 4 | 19 | 1  | 7.5  | 0   | 0   | 0   | 1005 | 8    | 83  | 1.3 |
| 2020 | 4 | 19 | 2  | 8.1  | 0   | 0   | 0   | 1004 | 8.8  | 105 | 1.9 |
| 2020 | 4 | 19 | 3  | 9.1  | 0   | 0   | 0   | 1004 | 9.6  | 116 | 2.8 |
| 2020 | 4 | 19 | 4  | 9.9  | 0   | 0   | 0   | 1004 | 9.9  | 121 | 3.1 |
| 2020 | 4 | 19 | 5  | 9.2  | 0   | 0   | 0   | 1004 | 9.2  | 123 | 2.4 |

|      |   |    |    |      |     |     |     |      |      |     |     |
|------|---|----|----|------|-----|-----|-----|------|------|-----|-----|
| 2020 | 4 | 19 | 6  | 10.1 | 0   | 0   | 0   | 1005 | 10.1 | 123 | 2.5 |
| 2020 | 4 | 19 | 7  | 10.9 | 25  | 0   | 25  | 1005 | 11.6 | 122 | 3.2 |
| 2020 | 4 | 19 | 8  | 11.3 | 90  | 0   | 90  | 1005 | 12.6 | 123 | 3.8 |
| 2020 | 4 | 19 | 9  | 11.2 | 94  | 0   | 94  | 1004 | 13.2 | 120 | 5   |
| 2020 | 4 | 19 | 10 | 10.6 | 106 | 0   | 106 | 1003 | 13.3 | 114 | 5.8 |
| 2020 | 4 | 19 | 11 | 9.9  | 175 | 6   | 180 | 1001 | 13.1 | 109 | 6.2 |
| 2020 | 4 | 19 | 12 | 9.3  | 209 | 10  | 218 | 1000 | 12.9 | 106 | 6.6 |
| 2020 | 4 | 19 | 13 | 8.9  | 230 | 11  | 241 | 999  | 12.4 | 109 | 6.3 |
| 2020 | 4 | 19 | 14 | 8.7  | 72  | 0   | 72  | 998  | 11.9 | 111 | 6.2 |
| 2020 | 4 | 19 | 15 | 8.8  | 55  | 0   | 55  | 997  | 11.5 | 105 | 6   |
| 2020 | 4 | 19 | 16 | 8.9  | 35  | 0   | 35  | 996  | 10.9 | 94  | 5.4 |
| 2020 | 4 | 19 | 17 | 9    | 19  | 0   | 19  | 995  | 10.5 | 83  | 5.2 |
| 2020 | 4 | 19 | 18 | 8.6  | 76  | 2   | 77  | 994  | 10   | 74  | 5.1 |
| 2020 | 4 | 19 | 19 | 8.2  | 1   | 0   | 1   | 994  | 9.5  | 64  | 4.8 |
| 2020 | 4 | 19 | 20 | 7.6  | 0   | 0   | 0   | 994  | 8.9  | 53  | 4.3 |
| 2020 | 4 | 19 | 21 | 7.1  | 0   | 0   | 0   | 994  | 8.4  | 43  | 3.7 |
| 2020 | 4 | 19 | 22 | 6.8  | 0   | 0   | 0   | 994  | 7.9  | 33  | 2.8 |
| 2020 | 4 | 19 | 23 | 6.6  | 0   | 0   | 0   | 995  | 7.6  | 18  | 1.8 |
| 2020 | 4 | 20 | 0  | 6.6  | 0   | 0   | 0   | 996  | 7.6  | 342 | 1.9 |
| 2020 | 4 | 20 | 1  | 6.5  | 0   | 0   | 0   | 996  | 7.4  | 334 | 2.6 |
| 2020 | 4 | 20 | 2  | 5.9  | 0   | 0   | 0   | 996  | 6    | 337 | 2   |
| 2020 | 4 | 20 | 3  | 5.4  | 0   | 0   | 0   | 996  | 5.4  | 331 | 2   |
| 2020 | 4 | 20 | 4  | 5.4  | 0   | 0   | 0   | 997  | 5.4  | 323 | 2   |
| 2020 | 4 | 20 | 5  | 5.9  | 0   | 0   | 0   | 998  | 5.9  | 314 | 2   |
| 2020 | 4 | 20 | 6  | 6.9  | 0   | 0   | 0   | 998  | 7    | 310 | 2.3 |
| 2020 | 4 | 20 | 7  | 7.8  | 74  | 7   | 75  | 999  | 8.4  | 302 | 2.7 |
| 2020 | 4 | 20 | 8  | 8.7  | 138 | 4   | 140 | 1000 | 10.7 | 300 | 3.5 |
| 2020 | 4 | 20 | 9  | 8.9  | 269 | 115 | 339 | 1000 | 12.9 | 294 | 3.8 |
| 2020 | 4 | 20 | 10 | 9    | 359 | 170 | 487 | 1000 | 14.7 | 285 | 3.9 |
| 2020 | 4 | 20 | 11 | 9.3  | 269 | 679 | 849 | 1000 | 16   | 276 | 4.3 |
| 2020 | 4 | 20 | 12 | 9.3  | 298 | 668 | 907 | 1000 | 16.9 | 271 | 5   |
| 2020 | 4 | 20 | 13 | 9.2  | 349 | 601 | 896 | 1000 | 17.2 | 268 | 5.6 |
| 2020 | 4 | 20 | 14 | 9.3  | 428 | 145 | 553 | 1000 | 16.9 | 267 | 6   |
| 2020 | 4 | 20 | 15 | 9.4  | 332 | 344 | 593 | 999  | 16.2 | 267 | 6.5 |
| 2020 | 4 | 20 | 16 | 9.7  | 251 | 47  | 280 | 1000 | 14.8 | 270 | 6.5 |
| 2020 | 4 | 20 | 17 | 10.1 | 43  | 0   | 43  | 1000 | 13   | 281 | 5.8 |
| 2020 | 4 | 20 | 18 | 9.8  | 13  | 0   | 13  | 1000 | 11.7 | 297 | 4.9 |
| 2020 | 4 | 20 | 19 | 8.6  | 6   | 5   | 6   | 1001 | 10   | 309 | 4.2 |
| 2020 | 4 | 20 | 20 | 7.3  | 0   | 0   | 0   | 1002 | 8.8  | 317 | 3.7 |
| 2020 | 4 | 20 | 21 | 6.6  | 0   | 0   | 0   | 1002 | 8    | 319 | 3   |
| 2020 | 4 | 20 | 22 | 6.3  | 0   | 0   | 0   | 1003 | 7.4  | 309 | 2.4 |
| 2020 | 4 | 20 | 23 | 6.2  | 0   | 0   | 0   | 1003 | 7.2  | 309 | 2   |
| 2020 | 4 | 21 | 0  | 6.2  | 0   | 0   | 0   | 1003 | 7.2  | 312 | 2.1 |
| 2020 | 4 | 21 | 1  | 6    | 0   | 0   | 0   | 1003 | 6.8  | 308 | 2   |
| 2020 | 4 | 21 | 2  | 5.8  | 0   | 0   | 0   | 1003 | 6.5  | 299 | 2   |
| 2020 | 4 | 21 | 3  | 5.5  | 0   | 0   | 0   | 1003 | 6.2  | 293 | 1.9 |
| 2020 | 4 | 21 | 4  | 5    | 0   | 0   | 0   | 1004 | 5.9  | 287 | 1.7 |
| 2020 | 4 | 21 | 5  | 4.6  | 0   | 0   | 0   | 1004 | 5.8  | 282 | 1.4 |
| 2020 | 4 | 21 | 6  | 4.8  | 0   | 0   | 0   | 1003 | 6.2  | 278 | 1.4 |
| 2020 | 4 | 21 | 7  | 5    | 81  | 127 | 109 | 1003 | 9.2  | 279 | 3.3 |

|      |   |    |    |      |     |     |     |      |      |     |     |
|------|---|----|----|------|-----|-----|-----|------|------|-----|-----|
| 2020 | 4 | 21 | 8  | 4.3  | 171 | 209 | 259 | 1003 | 11.1 | 291 | 4.7 |
| 2020 | 4 | 21 | 9  | 4.5  | 148 | 733 | 590 | 1004 | 12.4 | 297 | 5.3 |
| 2020 | 4 | 21 | 10 | 2.7  | 156 | 823 | 775 | 1004 | 13.3 | 302 | 6.1 |
| 2020 | 4 | 21 | 11 | 0.2  | 158 | 879 | 912 | 1004 | 13.3 | 305 | 6.9 |
| 2020 | 4 | 21 | 12 | -0.6 | 164 | 895 | 981 | 1004 | 13   | 305 | 7.4 |
| 2020 | 4 | 21 | 13 | -0.7 | 165 | 894 | 982 | 1004 | 12.6 | 304 | 7.5 |
| 2020 | 4 | 21 | 14 | -1.2 | 159 | 880 | 917 | 1003 | 11.9 | 306 | 7.6 |
| 2020 | 4 | 21 | 15 | -1.8 | 161 | 821 | 784 | 1004 | 11.1 | 305 | 7.6 |
| 2020 | 4 | 21 | 16 | -2.1 | 150 | 741 | 603 | 1004 | 10   | 305 | 7.4 |
| 2020 | 4 | 21 | 17 | -2   | 124 | 619 | 391 | 1004 | 8.8  | 305 | 6.9 |
| 2020 | 4 | 21 | 18 | -1.8 | 81  | 411 | 176 | 1004 | 7.2  | 308 | 6.1 |
| 2020 | 4 | 21 | 19 | -1.6 | 11  | 27  | 11  | 1005 | 5.9  | 312 | 5.6 |
| 2020 | 4 | 21 | 20 | -1.8 | 0   | 0   | 0   | 1006 | 5.3  | 315 | 5.7 |
| 2020 | 4 | 21 | 21 | -2.1 | 0   | 0   | 0   | 1006 | 4.9  | 316 | 5.6 |
| 2020 | 4 | 21 | 22 | -2.3 | 0   | 0   | 0   | 1007 | 4.6  | 315 | 5.4 |
| 2020 | 4 | 21 | 23 | -2.4 | 0   | 0   | 0   | 1007 | 4.6  | 313 | 5.2 |
| 2020 | 4 | 22 | 0  | -2.3 | 0   | 0   | 0   | 1006 | 4.5  | 311 | 4.9 |
| 2020 | 4 | 22 | 1  | -2.3 | 0   | 0   | 0   | 1006 | 3.9  | 308 | 4.4 |
| 2020 | 4 | 22 | 2  | -2.4 | 0   | 0   | 0   | 1006 | 3.5  | 305 | 4.1 |
| 2020 | 4 | 22 | 3  | -2.3 | 0   | 0   | 0   | 1005 | 3.4  | 305 | 4   |
| 2020 | 4 | 22 | 4  | -2.1 | 0   | 0   | 0   | 1005 | 3.4  | 304 | 3.8 |
| 2020 | 4 | 22 | 5  | -2   | 0   | 0   | 0   | 1005 | 3.9  | 303 | 3.8 |
| 2020 | 4 | 22 | 6  | -1.6 | 9   | 15  | 9   | 1005 | 5    | 303 | 3.8 |
| 2020 | 4 | 22 | 7  | -1.6 | 77  | 428 | 173 | 1005 | 7.4  | 303 | 4.6 |
| 2020 | 4 | 22 | 8  | -2.5 | 115 | 658 | 395 | 1005 | 9    | 303 | 5.8 |
| 2020 | 4 | 22 | 9  | -2.1 | 141 | 772 | 609 | 1006 | 10.2 | 301 | 6.4 |
| 2020 | 4 | 22 | 10 | -1.4 | 157 | 840 | 791 | 1006 | 11   | 299 | 7   |
| 2020 | 4 | 22 | 11 | -0.9 | 163 | 885 | 924 | 1006 | 11.5 | 297 | 7.5 |
| 2020 | 4 | 22 | 12 | -0.7 | 180 | 883 | 988 | 1005 | 11.6 | 297 | 7.7 |
| 2020 | 4 | 22 | 13 | -0.8 | 373 | 492 | 824 | 1005 | 11.6 | 297 | 7.9 |
| 2020 | 4 | 22 | 14 | -1   | 397 | 342 | 691 | 1004 | 11.2 | 298 | 8.1 |
| 2020 | 4 | 22 | 15 | -1.5 | 364 | 135 | 467 | 1004 | 10.5 | 298 | 8   |
| 2020 | 4 | 22 | 16 | -2.1 | 275 | 209 | 404 | 1004 | 9.4  | 300 | 7.6 |
| 2020 | 4 | 22 | 17 | -2.6 | 126 | 631 | 400 | 1004 | 8.2  | 303 | 6.9 |
| 2020 | 4 | 22 | 18 | -2.4 | 79  | 256 | 139 | 1005 | 6.6  | 305 | 5.7 |
| 2020 | 4 | 22 | 19 | -1.5 | 11  | 35  | 12  | 1006 | 4.7  | 307 | 4.1 |
| 2020 | 4 | 22 | 20 | -0.9 | 0   | 0   | 0   | 1006 | 3.8  | 309 | 3.5 |
| 2020 | 4 | 22 | 21 | -0.7 | 0   | 0   | 0   | 1007 | 3.2  | 313 | 3   |
| 2020 | 4 | 22 | 22 | -0.5 | 0   | 0   | 0   | 1006 | 2.9  | 317 | 2.8 |
| 2020 | 4 | 22 | 23 | -0.3 | 0   | 0   | 0   | 1006 | 2.3  | 318 | 2.4 |
| 2020 | 4 | 23 | 0  | -0.4 | 0   | 0   | 0   | 1006 | 2    | 316 | 2.4 |
| 2020 | 4 | 23 | 1  | -0.4 | 0   | 0   | 0   | 1006 | 1.9  | 315 | 2.4 |
| 2020 | 4 | 23 | 2  | -0.3 | 0   | 0   | 0   | 1006 | 2.1  | 316 | 2.4 |
| 2020 | 4 | 23 | 3  | 0    | 0   | 0   | 0   | 1006 | 2.6  | 316 | 2.5 |
| 2020 | 4 | 23 | 4  | 0.2  | 0   | 0   | 0   | 1006 | 2.8  | 316 | 2.4 |
| 2020 | 4 | 23 | 5  | 0.3  | 0   | 0   | 0   | 1006 | 2.8  | 314 | 2.2 |
| 2020 | 4 | 23 | 6  | 0.8  | 6   | 0   | 6   | 1006 | 3.7  | 312 | 2.4 |
| 2020 | 4 | 23 | 7  | 0.8  | 94  | 322 | 168 | 1006 | 6.2  | 311 | 3.8 |
| 2020 | 4 | 23 | 8  | 0    | 163 | 35  | 178 | 1006 | 8.1  | 316 | 4.9 |
| 2020 | 4 | 23 | 9  | 0    | 211 | 15  | 220 | 1006 | 9.9  | 316 | 5.4 |

|      |   |    |    |      |     |     |      |      |      |     |     |
|------|---|----|----|------|-----|-----|------|------|------|-----|-----|
| 2020 | 4 | 23 | 10 | 0.3  | 359 | 223 | 528  | 1006 | 11.2 | 315 | 5.8 |
| 2020 | 4 | 23 | 11 | 0.5  | 163 | 875 | 918  | 1005 | 12.3 | 314 | 6.1 |
| 2020 | 4 | 23 | 12 | 0.6  | 160 | 903 | 988  | 1005 | 12.9 | 310 | 6.3 |
| 2020 | 4 | 23 | 13 | 0.5  | 155 | 910 | 991  | 1005 | 13.2 | 305 | 6.4 |
| 2020 | 4 | 23 | 14 | 0.3  | 150 | 894 | 924  | 1004 | 13.2 | 298 | 6.4 |
| 2020 | 4 | 23 | 15 | 0    | 167 | 816 | 789  | 1004 | 12.6 | 290 | 6.5 |
| 2020 | 4 | 23 | 16 | 0    | 158 | 729 | 606  | 1004 | 11.7 | 284 | 6.2 |
| 2020 | 4 | 23 | 17 | 1.2  | 135 | 587 | 390  | 1004 | 10.6 | 281 | 5.4 |
| 2020 | 4 | 23 | 18 | 3    | 90  | 356 | 174  | 1004 | 8.9  | 286 | 3.8 |
| 2020 | 4 | 23 | 19 | 4.2  | 7   | 0   | 7    | 1005 | 6.3  | 294 | 2.4 |
| 2020 | 4 | 23 | 20 | 4.2  | 0   | 0   | 0    | 1006 | 5.6  | 302 | 2.2 |
| 2020 | 4 | 23 | 21 | 3.6  | 0   | 0   | 0    | 1006 | 5    | 307 | 1.9 |
| 2020 | 4 | 23 | 22 | 2.5  | 0   | 0   | 0    | 1006 | 4.3  | 308 | 1.8 |
| 2020 | 4 | 23 | 23 | 1.3  | 0   | 0   | 0    | 1006 | 3.5  | 307 | 1.8 |
| 2020 | 4 | 24 | 0  | 0.7  | 0   | 0   | 0    | 1005 | 3    | 307 | 1.9 |
| 2020 | 4 | 24 | 1  | 0.4  | 0   | 0   | 0    | 1005 | 2.7  | 307 | 2   |
| 2020 | 4 | 24 | 2  | -0.1 | 0   | 0   | 0    | 1005 | 2.3  | 306 | 2   |
| 2020 | 4 | 24 | 3  | -0.7 | 0   | 0   | 0    | 1005 | 1.9  | 303 | 1.9 |
| 2020 | 4 | 24 | 4  | -1.1 | 0   | 0   | 0    | 1005 | 1.6  | 301 | 1.8 |
| 2020 | 4 | 24 | 5  | -1.4 | 0   | 0   | 0    | 1005 | 1.3  | 299 | 1.7 |
| 2020 | 4 | 24 | 6  | 0    | 12  | 79  | 14   | 1005 | 2.8  | 293 | 1.5 |
| 2020 | 4 | 24 | 7  | 0.7  | 64  | 534 | 187  | 1006 | 7.4  | 280 | 2.6 |
| 2020 | 4 | 24 | 8  | -1.3 | 91  | 743 | 412  | 1006 | 9.7  | 278 | 3.4 |
| 2020 | 4 | 24 | 9  | -1   | 108 | 852 | 629  | 1006 | 11.3 | 267 | 3.5 |
| 2020 | 4 | 24 | 10 | -0.5 | 119 | 911 | 811  | 1005 | 12.8 | 257 | 4   |
| 2020 | 4 | 24 | 11 | -0.5 | 127 | 942 | 941  | 1005 | 14   | 254 | 4.8 |
| 2020 | 4 | 24 | 12 | -0.6 | 144 | 935 | 1003 | 1004 | 14.8 | 254 | 5.5 |
| 2020 | 4 | 24 | 13 | -0.5 | 147 | 930 | 1003 | 1004 | 15.1 | 256 | 6   |
| 2020 | 4 | 24 | 14 | -0.5 | 144 | 912 | 935  | 1004 | 15   | 257 | 6.2 |
| 2020 | 4 | 24 | 15 | -0.6 | 138 | 873 | 805  | 1003 | 14.5 | 258 | 6.1 |
| 2020 | 4 | 24 | 16 | -0.5 | 129 | 801 | 623  | 1003 | 13.8 | 256 | 5.8 |
| 2020 | 4 | 24 | 17 | 0.4  | 109 | 689 | 410  | 1003 | 12.6 | 251 | 5   |
| 2020 | 4 | 24 | 18 | 3.1  | 73  | 480 | 187  | 1003 | 10.1 | 241 | 2.9 |
| 2020 | 4 | 24 | 19 | 3.8  | 13  | 72  | 15   | 1003 | 6.9  | 230 | 2.1 |
| 2020 | 4 | 24 | 20 | 4    | 0   | 0   | 0    | 1004 | 6.3  | 222 | 2.2 |
| 2020 | 4 | 24 | 21 | 4.7  | 0   | 0   | 0    | 1004 | 5.7  | 210 | 2.2 |
| 2020 | 4 | 24 | 22 | 5.4  | 0   | 0   | 0    | 1004 | 5.4  | 204 | 2.3 |
| 2020 | 4 | 24 | 23 | 5.4  | 0   | 0   | 0    | 1003 | 5.4  | 199 | 2.4 |
| 2020 | 4 | 25 | 0  | 5.5  | 0   | 0   | 0    | 1003 | 5.5  | 197 | 2.7 |
| 2020 | 4 | 25 | 1  | 5.6  | 0   | 0   | 0    | 1003 | 5.6  | 195 | 2.9 |
| 2020 | 4 | 25 | 2  | 5.8  | 0   | 0   | 0    | 1002 | 5.8  | 194 | 3.1 |
| 2020 | 4 | 25 | 3  | 6.1  | 0   | 0   | 0    | 1002 | 6.1  | 193 | 3.2 |
| 2020 | 4 | 25 | 4  | 6.3  | 0   | 0   | 0    | 1001 | 6.3  | 192 | 3.3 |
| 2020 | 4 | 25 | 5  | 6.6  | 0   | 0   | 0    | 1001 | 6.6  | 192 | 3.4 |
| 2020 | 4 | 25 | 6  | 7    | 8   | 19  | 9    | 1001 | 7.8  | 190 | 3.9 |
| 2020 | 4 | 25 | 7  | 7.9  | 98  | 272 | 161  | 1001 | 10.6 | 188 | 4.8 |
| 2020 | 4 | 25 | 8  | 8.5  | 168 | 457 | 367  | 1001 | 13.7 | 197 | 5.9 |
| 2020 | 4 | 25 | 9  | 9.3  | 212 | 585 | 572  | 1000 | 16.4 | 210 | 6.9 |
| 2020 | 4 | 25 | 10 | 9.7  | 226 | 685 | 748  | 1000 | 18.2 | 217 | 7.1 |
| 2020 | 4 | 25 | 11 | 8.6  | 219 | 767 | 884  | 999  | 19.4 | 223 | 7.2 |

|      |   |    |    |      |     |     |     |      |      |     |     |
|------|---|----|----|------|-----|-----|-----|------|------|-----|-----|
| 2020 | 4 | 25 | 12 | 7.5  | 220 | 795 | 953 | 999  | 20.1 | 227 | 7.4 |
| 2020 | 4 | 25 | 13 | 6.9  | 218 | 803 | 959 | 998  | 20.4 | 230 | 7.8 |
| 2020 | 4 | 25 | 14 | 7.2  | 224 | 766 | 891 | 998  | 20.2 | 233 | 8.1 |
| 2020 | 4 | 25 | 15 | 9    | 239 | 665 | 749 | 997  | 19.4 | 238 | 8.1 |
| 2020 | 4 | 25 | 16 | 10   | 233 | 533 | 563 | 997  | 17.8 | 247 | 7.7 |
| 2020 | 4 | 25 | 17 | 10.3 | 190 | 381 | 358 | 998  | 15.7 | 252 | 6.6 |
| 2020 | 4 | 25 | 18 | 10.7 | 107 | 172 | 148 | 999  | 13.5 | 258 | 4.6 |
| 2020 | 4 | 25 | 19 | 10.8 | 5   | 4   | 5   | 999  | 11.2 | 266 | 3   |
| 2020 | 4 | 25 | 20 | 10.2 | 0   | 0   | 0   | 1000 | 10.5 | 282 | 2.8 |
| 2020 | 4 | 25 | 21 | 9.1  | 0   | 0   | 0   | 1002 | 9.1  | 297 | 2.1 |
| 2020 | 4 | 25 | 22 | 7.4  | 0   | 0   | 0   | 1002 | 7.4  | 310 | 1.7 |
| 2020 | 4 | 25 | 23 | 6.4  | 0   | 0   | 0   | 1003 | 6.4  | 317 | 1.5 |
| 2020 | 4 | 26 | 0  | 5.5  | 0   | 0   | 0   | 1003 | 5.5  | 318 | 1.6 |
| 2020 | 4 | 26 | 1  | 5.1  | 0   | 0   | 0   | 1003 | 5.1  | 317 | 1.8 |
| 2020 | 4 | 26 | 2  | 5    | 0   | 0   | 0   | 1003 | 5    | 316 | 1.8 |
| 2020 | 4 | 26 | 3  | 5.4  | 0   | 0   | 0   | 1003 | 5.4  | 315 | 1.9 |
| 2020 | 4 | 26 | 4  | 6    | 0   | 0   | 0   | 1003 | 6    | 315 | 2.1 |
| 2020 | 4 | 26 | 5  | 6.2  | 0   | 0   | 0   | 1004 | 6.5  | 316 | 2.8 |
| 2020 | 4 | 26 | 6  | 6.2  | 13  | 40  | 14  | 1004 | 6.6  | 316 | 2.5 |
| 2020 | 4 | 26 | 7  | 6.5  | 81  | 431 | 183 | 1005 | 8.5  | 316 | 2.9 |
| 2020 | 4 | 26 | 8  | 4.3  | 112 | 666 | 404 | 1005 | 11.5 | 323 | 3.8 |
| 2020 | 4 | 26 | 9  | 2.8  | 131 | 788 | 618 | 1006 | 13.6 | 326 | 4.4 |
| 2020 | 4 | 26 | 10 | 2.6  | 140 | 859 | 798 | 1006 | 14.9 | 327 | 4.6 |
| 2020 | 4 | 26 | 11 | 2.3  | 146 | 905 | 933 | 1006 | 15.7 | 328 | 4.8 |
| 2020 | 4 | 26 | 12 | 2    | 166 | 895 | 993 | 1006 | 16.3 | 330 | 4.8 |
| 2020 | 4 | 26 | 13 | 1.8  | 158 | 906 | 996 | 1005 | 16.8 | 335 | 4.5 |
| 2020 | 4 | 26 | 14 | 1.9  | 149 | 898 | 931 | 1005 | 17   | 336 | 4.2 |
| 2020 | 4 | 26 | 15 | 1.8  | 150 | 844 | 798 | 1004 | 16.9 | 336 | 3.9 |
| 2020 | 4 | 26 | 16 | 1.9  | 162 | 716 | 607 | 1004 | 16.4 | 334 | 3.7 |
| 2020 | 4 | 26 | 17 | 2.5  | 155 | 526 | 388 | 1005 | 15.2 | 333 | 3.2 |
| 2020 | 4 | 26 | 18 | 5.5  | 87  | 201 | 136 | 1005 | 12.3 | 325 | 2.1 |
| 2020 | 4 | 26 | 19 | 5.3  | 9   | 9   | 10  | 1006 | 9.4  | 326 | 2   |
| 2020 | 4 | 26 | 20 | 5.1  | 0   | 0   | 0   | 1007 | 8.7  | 332 | 2.2 |
| 2020 | 4 | 26 | 21 | 5.2  | 0   | 0   | 0   | 1007 | 8.3  | 339 | 2.2 |
| 2020 | 4 | 26 | 22 | 5.2  | 0   | 0   | 0   | 1008 | 7.7  | 345 | 1.9 |
| 2020 | 4 | 26 | 23 | 5.1  | 0   | 0   | 0   | 1008 | 7.2  | 348 | 1.7 |
| 2020 | 4 | 27 | 0  | 4.7  | 0   | 0   | 0   | 1008 | 6.8  | 354 | 1.7 |
| 2020 | 4 | 27 | 1  | 3.7  | 0   | 0   | 0   | 1008 | 5.7  | 359 | 1.6 |
| 2020 | 4 | 27 | 2  | 2.6  | 0   | 0   | 0   | 1008 | 4.6  | 5   | 1.4 |
| 2020 | 4 | 27 | 3  | 1.8  | 0   | 0   | 0   | 1007 | 4.1  | 10  | 1.3 |
| 2020 | 4 | 27 | 4  | 1.1  | 0   | 0   | 0   | 1007 | 3.8  | 13  | 1.3 |
| 2020 | 4 | 27 | 5  | 0.5  | 0   | 0   | 0   | 1008 | 3.6  | 15  | 1.3 |
| 2020 | 4 | 27 | 6  | 1.9  | 13  | 48  | 15  | 1008 | 5.1  | 17  | 1.1 |
| 2020 | 4 | 27 | 7  | 1.5  | 89  | 383 | 181 | 1009 | 9    | 15  | 1.7 |
| 2020 | 4 | 27 | 8  | 1.3  | 138 | 587 | 397 | 1009 | 12   | 343 | 2.1 |
| 2020 | 4 | 27 | 9  | 1.3  | 168 | 705 | 606 | 1009 | 14.7 | 321 | 2.9 |
| 2020 | 4 | 27 | 10 | 2.3  | 186 | 774 | 780 | 1009 | 15.9 | 304 | 3.2 |
| 2020 | 4 | 27 | 11 | 2.9  | 193 | 821 | 910 | 1009 | 16.8 | 292 | 3.7 |
| 2020 | 4 | 27 | 12 | 3    | 189 | 852 | 978 | 1009 | 17.2 | 286 | 4.4 |
| 2020 | 4 | 27 | 13 | 3.1  | 200 | 836 | 974 | 1008 | 17.3 | 284 | 5   |



|      |   |    |    |     |     |     |     |      |      |     |     |
|------|---|----|----|-----|-----|-----|-----|------|------|-----|-----|
| 2020 | 4 | 27 | 14 | 3.1 | 198 | 812 | 907 | 1008 | 16.9 | 285 | 5.2 |
| 2020 | 4 | 27 | 15 | 3   | 185 | 773 | 780 | 1007 | 16.4 | 289 | 5.1 |
| 2020 | 4 | 27 | 16 | 3   | 159 | 720 | 608 | 1007 | 15.5 | 295 | 4.8 |
| 2020 | 4 | 27 | 17 | 3.2 | 120 | 647 | 407 | 1007 | 14.2 | 302 | 4.4 |
| 2020 | 4 | 27 | 18 | 5.1 | 74  | 487 | 193 | 1007 | 11.8 | 305 | 2.7 |
| 2020 | 4 | 27 | 19 | 5.9 | 16  | 102 | 20  | 1008 | 8.3  | 304 | 1.6 |
| 2020 | 4 | 27 | 20 | 6.4 | 0   | 0   | 0   | 1009 | 7    | 305 | 1.5 |
| 2020 | 4 | 27 | 21 | 6   | 0   | 0   | 0   | 1009 | 6    | 307 | 1.3 |
| 2020 | 4 | 27 | 22 | 5.4 | 0   | 0   | 0   | 1009 | 5.4  | 308 | 1.2 |
| 2020 | 4 | 27 | 23 | 5.5 | 0   | 0   | 0   | 1009 | 5.5  | 308 | 1.1 |
| 2020 | 4 | 28 | 0  | 6.1 | 0   | 0   | 0   | 1009 | 6.1  | 309 | 1.1 |
| 2020 | 4 | 28 | 1  | 6.9 | 0   | 0   | 0   | 1009 | 7    | 311 | 2   |
| 2020 | 4 | 28 | 2  | 6.5 | 0   | 0   | 0   | 1009 | 6.7  | 315 | 2   |
| 2020 | 4 | 28 | 3  | 6.3 | 0   | 0   | 0   | 1009 | 6.5  | 319 | 1.9 |
| 2020 | 4 | 28 | 4  | 6.2 | 0   | 0   | 0   | 1009 | 6.4  | 322 | 1.6 |
| 2020 | 4 | 28 | 5  | 6.1 | 0   | 0   | 0   | 1010 | 6.3  | 326 | 1.5 |
| 2020 | 4 | 28 | 6  | 5.9 | 13  | 24  | 14  | 1010 | 6.4  | 334 | 1.5 |
| 2020 | 4 | 28 | 7  | 6.1 | 94  | 344 | 178 | 1011 | 7.5  | 348 | 1.4 |
| 2020 | 4 | 28 | 8  | 5.2 | 137 | 576 | 394 | 1011 | 11   | 323 | 1.9 |
| 2020 | 4 | 28 | 9  | 2.9 | 162 | 705 | 602 | 1011 | 14.5 | 308 | 2.8 |
| 2020 | 4 | 28 | 10 | 3.2 | 178 | 782 | 780 | 1011 | 16.2 | 297 | 2.9 |
| 2020 | 4 | 28 | 11 | 3.6 | 190 | 819 | 906 | 1010 | 17.4 | 287 | 3.2 |
| 2020 | 4 | 28 | 12 | 3.8 | 198 | 833 | 971 | 1009 | 18.2 | 279 | 3.6 |
| 2020 | 4 | 28 | 13 | 3.7 | 196 | 836 | 972 | 1009 | 18.6 | 274 | 4   |
| 2020 | 4 | 28 | 14 | 3.4 | 188 | 822 | 908 | 1008 | 18.6 | 269 | 4.3 |
| 2020 | 4 | 28 | 15 | 3.1 | 172 | 793 | 784 | 1007 | 18.1 | 265 | 4.5 |
| 2020 | 4 | 28 | 16 | 2.8 | 154 | 726 | 608 | 1007 | 17.2 | 262 | 4.4 |
| 2020 | 4 | 28 | 17 | 3.3 | 126 | 615 | 401 | 1007 | 15.7 | 259 | 3.9 |
| 2020 | 4 | 28 | 18 | 6.3 | 84  | 414 | 186 | 1008 | 12.8 | 256 | 2.1 |
| 2020 | 4 | 28 | 19 | 6.5 | 15  | 54  | 18  | 1008 | 9.3  | 253 | 1.5 |
| 2020 | 4 | 28 | 20 | 6.5 | 0   | 0   | 0   | 1008 | 8.2  | 250 | 1.4 |
| 2020 | 4 | 28 | 21 | 7   | 0   | 0   | 0   | 1008 | 7.4  | 246 | 1.3 |
| 2020 | 4 | 28 | 22 | 6.8 | 0   | 0   | 0   | 1008 | 6.8  | 244 | 1.3 |
| 2020 | 4 | 28 | 23 | 6.3 | 0   | 0   | 0   | 1008 | 6.3  | 241 | 1.3 |
| 2020 | 4 | 29 | 0  | 5.8 | 0   | 0   | 0   | 1007 | 5.8  | 240 | 1.3 |
| 2020 | 4 | 29 | 1  | 5.4 | 0   | 0   | 0   | 1007 | 5.4  | 241 | 1.3 |
| 2020 | 4 | 29 | 2  | 5   | 0   | 0   | 0   | 1007 | 5    | 242 | 1.3 |
| 2020 | 4 | 29 | 3  | 4.8 | 0   | 0   | 0   | 1007 | 4.8  | 245 | 1.2 |
| 2020 | 4 | 29 | 4  | 4.9 | 0   | 0   | 0   | 1007 | 4.9  | 251 | 1.2 |
| 2020 | 4 | 29 | 5  | 5   | 0   | 0   | 0   | 1008 | 5    | 257 | 1.2 |
| 2020 | 4 | 29 | 6  | 6.5 | 15  | 40  | 17  | 1008 | 6.5  | 259 | 1   |
| 2020 | 4 | 29 | 7  | 7.4 | 89  | 383 | 184 | 1009 | 10.1 | 255 | 1.2 |
| 2020 | 4 | 29 | 8  | 5.7 | 135 | 591 | 399 | 1009 | 13.5 | 264 | 1.8 |
| 2020 | 4 | 29 | 9  | 4.1 | 165 | 707 | 608 | 1009 | 16.3 | 272 | 2.3 |
| 2020 | 4 | 29 | 10 | 4.9 | 184 | 771 | 780 | 1009 | 18.1 | 269 | 2   |
| 2020 | 4 | 29 | 11 | 5.7 | 199 | 810 | 909 | 1008 | 19.5 | 256 | 1.8 |
| 2020 | 4 | 29 | 12 | 6.4 | 188 | 849 | 978 | 1008 | 20.4 | 245 | 1.8 |
| 2020 | 4 | 29 | 13 | 6.8 | 187 | 851 | 979 | 1007 | 20.9 | 239 | 2   |
| 2020 | 4 | 29 | 14 | 7   | 181 | 835 | 913 | 1007 | 21.1 | 234 | 2.2 |
| 2020 | 4 | 29 | 15 | 7.1 | 177 | 784 | 784 | 1006 | 20.9 | 231 | 2.3 |

|      |   |    |    |      |     |     |     |      |      |     |     |
|------|---|----|----|------|-----|-----|-----|------|------|-----|-----|
| 2020 | 4 | 29 | 16 | 7.2  | 155 | 725 | 610 | 1006 | 20.3 | 228 | 2.4 |
| 2020 | 4 | 29 | 17 | 8    | 125 | 626 | 406 | 1006 | 18.9 | 225 | 2   |
| 2020 | 4 | 29 | 18 | 10.4 | 82  | 439 | 192 | 1006 | 15.8 | 225 | 1.3 |
| 2020 | 4 | 29 | 19 | 7.8  | 18  | 70  | 21  | 1006 | 11.8 | 222 | 1.2 |
| 2020 | 4 | 29 | 20 | 6.5  | 0   | 0   | 0   | 1006 | 10.4 | 218 | 1.2 |
| 2020 | 4 | 29 | 21 | 5.3  | 0   | 0   | 0   | 1007 | 9.6  | 213 | 1.2 |
| 2020 | 4 | 29 | 22 | 4.2  | 0   | 0   | 0   | 1007 | 9    | 207 | 1.3 |
| 2020 | 4 | 29 | 23 | 3.6  | 0   | 0   | 0   | 1007 | 8.3  | 198 | 1.3 |
| 2020 | 4 | 30 | 0  | 3.3  | 0   | 0   | 0   | 1007 | 7.3  | 189 | 1.3 |
| 2020 | 4 | 30 | 1  | 3.3  | 0   | 0   | 0   | 1006 | 6.5  | 186 | 1.4 |
| 2020 | 4 | 30 | 2  | 3.7  | 0   | 0   | 0   | 1006 | 5.9  | 187 | 1.4 |
| 2020 | 4 | 30 | 3  | 4.5  | 0   | 0   | 0   | 1006 | 5.6  | 185 | 1.4 |
| 2020 | 4 | 30 | 4  | 5.5  | 0   | 0   | 0   | 1006 | 5.5  | 178 | 1.4 |
| 2020 | 4 | 30 | 5  | 5.4  | 0   | 0   | 0   | 1006 | 5.4  | 168 | 1.4 |
| 2020 | 4 | 30 | 6  | 7.6  | 19  | 72  | 22  | 1006 | 7.7  | 157 | 1.4 |
| 2020 | 4 | 30 | 7  | 9.1  | 83  | 445 | 195 | 1006 | 12   | 148 | 2.8 |
| 2020 | 4 | 30 | 8  | 9.9  | 122 | 639 | 410 | 1006 | 15.4 | 168 | 3.1 |
| 2020 | 4 | 30 | 9  | 10.9 | 148 | 742 | 615 | 1006 | 18.3 | 186 | 3.5 |
| 2020 | 4 | 30 | 10 | 12.4 | 169 | 795 | 785 | 1005 | 20.5 | 193 | 3.6 |
| 2020 | 4 | 30 | 11 | 13.4 | 186 | 819 | 905 | 1005 | 21.9 | 195 | 3.6 |
| 2020 | 4 | 30 | 12 | 14.1 | 348 | 572 | 881 | 1004 | 22.9 | 197 | 3.8 |
| 2020 | 4 | 30 | 13 | 14.6 | 180 | 852 | 974 | 1004 | 23.5 | 198 | 4   |
| 2020 | 4 | 30 | 14 | 14.8 | 185 | 816 | 902 | 1003 | 23.7 | 199 | 4.1 |
| 2020 | 4 | 30 | 15 | 14.9 | 168 | 788 | 779 | 1002 | 23.5 | 200 | 4.2 |
| 2020 | 4 | 30 | 16 | 15   | 163 | 697 | 602 | 1002 | 22.8 | 198 | 4.1 |
| 2020 | 4 | 30 | 17 | 15.4 | 141 | 557 | 392 | 1002 | 21.7 | 196 | 3.5 |
| 2020 | 4 | 30 | 18 | 16.2 | 97  | 335 | 181 | 1002 | 19.3 | 190 | 2   |
| 2020 | 4 | 30 | 19 | 15   | 16  | 29  | 17  | 1002 | 16.2 | 186 | 1.7 |
| 2020 | 4 | 30 | 20 | 14.5 | 0   | 0   | 0   | 1002 | 15.3 | 188 | 1.9 |
| 2020 | 4 | 30 | 21 | 14.2 | 0   | 0   | 0   | 1003 | 14.5 | 190 | 2   |
| 2020 | 4 | 30 | 22 | 13.7 | 0   | 0   | 0   | 1003 | 13.7 | 192 | 1.9 |
| 2020 | 4 | 30 | 23 | 12.9 | 0   | 0   | 0   | 1003 | 12.9 | 192 | 1.8 |
| 2020 | 5 | 1  | 0  | 12.2 | 0   | 0   | 0   | 1002 | 12.2 | 193 | 1.8 |
| 2020 | 5 | 1  | 1  | 11.7 | 0   | 0   | 0   | 1002 | 11.7 | 194 | 1.9 |
| 2020 | 5 | 1  | 2  | 11.4 | 0   | 0   | 0   | 1002 | 11.4 | 196 | 1.9 |
| 2020 | 5 | 1  | 3  | 11.4 | 0   | 0   | 0   | 1002 | 11.4 | 199 | 2   |
| 2020 | 5 | 1  | 4  | 11.3 | 0   | 0   | 0   | 1002 | 11.3 | 200 | 2   |
| 2020 | 5 | 1  | 5  | 11.1 | 0   | 0   | 0   | 1002 | 11.1 | 197 | 1.9 |
| 2020 | 5 | 1  | 6  | 13   | 16  | 24  | 17  | 1002 | 13   | 195 | 2.3 |
| 2020 | 5 | 1  | 7  | 14.4 | 103 | 294 | 178 | 1002 | 15.8 | 190 | 3.2 |
| 2020 | 5 | 1  | 8  | 16.1 | 122 | 0   | 122 | 1003 | 18.7 | 189 | 3.4 |
| 2020 | 5 | 1  | 9  | 17.2 | 201 | 598 | 580 | 1003 | 21.4 | 198 | 4.1 |
| 2020 | 5 | 1  | 10 | 17.5 | 314 | 35  | 341 | 1003 | 23.1 | 201 | 4.5 |
| 2020 | 5 | 1  | 11 | 17.6 | 257 | 690 | 865 | 1002 | 24.2 | 203 | 4.7 |
| 2020 | 5 | 1  | 12 | 17.8 | 258 | 717 | 928 | 1002 | 24.9 | 204 | 4.7 |
| 2020 | 5 | 1  | 13 | 17.8 | 263 | 711 | 927 | 1002 | 25.3 | 205 | 4.7 |
| 2020 | 5 | 1  | 14 | 17.6 | 257 | 688 | 862 | 1001 | 25.3 | 206 | 4.5 |
| 2020 | 5 | 1  | 15 | 17.3 | 233 | 657 | 744 | 1001 | 24.7 | 206 | 4.4 |
| 2020 | 5 | 1  | 16 | 17   | 212 | 576 | 575 | 1001 | 23.8 | 205 | 4   |
| 2020 | 5 | 1  | 17 | 17   | 175 | 443 | 376 | 1001 | 22.6 | 205 | 3.3 |

|      |   |   |    |      |     |     |     |      |      |     |     |
|------|---|---|----|------|-----|-----|-----|------|------|-----|-----|
| 2020 | 5 | 1 | 18 | 17.7 | 87  | 8   | 89  | 1001 | 20.5 | 201 | 1.9 |
| 2020 | 5 | 1 | 19 | 16.3 | 15  | 23  | 16  | 1001 | 17.5 | 190 | 1.4 |
| 2020 | 5 | 1 | 20 | 15.6 | 0   | 0   | 0   | 1001 | 16.3 | 186 | 1.4 |
| 2020 | 5 | 1 | 21 | 15.2 | 0   | 0   | 0   | 1002 | 15.6 | 190 | 1.5 |
| 2020 | 5 | 1 | 22 | 14.8 | 0   | 0   | 0   | 1002 | 15   | 192 | 1.5 |
| 2020 | 5 | 1 | 23 | 14.3 | 0   | 0   | 0   | 1002 | 14.3 | 194 | 1.4 |
| 2020 | 5 | 2 | 0  | 13.8 | 0   | 0   | 0   | 1001 | 13.8 | 193 | 1.5 |
| 2020 | 5 | 2 | 1  | 13.7 | 0   | 0   | 0   | 1001 | 13.7 | 196 | 1.8 |
| 2020 | 5 | 2 | 2  | 13.5 | 0   | 0   | 0   | 1001 | 13.5 | 193 | 1.8 |
| 2020 | 5 | 2 | 3  | 13.3 | 0   | 0   | 0   | 1001 | 13.3 | 191 | 1.7 |
| 2020 | 5 | 2 | 4  | 13.1 | 0   | 0   | 0   | 1001 | 13.1 | 190 | 1.6 |
| 2020 | 5 | 2 | 5  | 13   | 0   | 0   | 0   | 1001 | 13   | 190 | 1.7 |
| 2020 | 5 | 2 | 6  | 13.9 | 12  | 0   | 12  | 1001 | 13.9 | 187 | 1.8 |
| 2020 | 5 | 2 | 7  | 14.5 | 94  | 36  | 103 | 1001 | 15.4 | 176 | 2.3 |
| 2020 | 5 | 2 | 8  | 15   | 192 | 136 | 254 | 1001 | 16.3 | 164 | 2.4 |
| 2020 | 5 | 2 | 9  | 15.6 | 280 | 253 | 440 | 1002 | 18.2 | 166 | 2.7 |
| 2020 | 5 | 2 | 10 | 15.6 | 375 | 136 | 481 | 1002 | 20.2 | 169 | 2.9 |
| 2020 | 5 | 2 | 11 | 15.4 | 441 | 159 | 581 | 1001 | 20.9 | 164 | 2.8 |
| 2020 | 5 | 2 | 12 | 15.5 | 370 | 29  | 396 | 1000 | 20.8 | 163 | 2.9 |
| 2020 | 5 | 2 | 13 | 15.7 | 296 | 16  | 311 | 1000 | 20.7 | 168 | 3.2 |
| 2020 | 5 | 2 | 14 | 16   | 340 | 27  | 363 | 999  | 20.4 | 172 | 3   |
| 2020 | 5 | 2 | 15 | 16.4 | 162 | 3   | 164 | 998  | 20.2 | 167 | 2.5 |
| 2020 | 5 | 2 | 16 | 16.7 | 71  | 0   | 71  | 998  | 20.2 | 155 | 2.2 |
| 2020 | 5 | 2 | 17 | 17   | 20  | 0   | 20  | 997  | 20   | 128 | 1.9 |
| 2020 | 5 | 2 | 18 | 17.2 | 15  | 0   | 15  | 997  | 18.6 | 122 | 1.5 |
| 2020 | 5 | 2 | 19 | 16.6 | 10  | 0   | 10  | 997  | 17.6 | 127 | 2   |
| 2020 | 5 | 2 | 20 | 16.5 | 0   | 0   | 0   | 997  | 17.4 | 130 | 2.6 |
| 2020 | 5 | 2 | 21 | 16.5 | 0   | 0   | 0   | 998  | 17   | 129 | 2.7 |
| 2020 | 5 | 2 | 22 | 16.3 | 0   | 0   | 0   | 997  | 16.4 | 127 | 2.4 |
| 2020 | 5 | 2 | 23 | 16   | 0   | 0   | 0   | 997  | 16   | 129 | 2.6 |
| 2020 | 5 | 3 | 0  | 15.9 | 0   | 0   | 0   | 996  | 16   | 134 | 3   |
| 2020 | 5 | 3 | 1  | 16.1 | 0   | 0   | 0   | 995  | 16.3 | 134 | 3.3 |
| 2020 | 5 | 3 | 2  | 16.1 | 0   | 0   | 0   | 995  | 16.4 | 132 | 3.3 |
| 2020 | 5 | 3 | 3  | 16.1 | 0   | 0   | 0   | 994  | 16.4 | 130 | 3.6 |
| 2020 | 5 | 3 | 4  | 15.9 | 0   | 0   | 0   | 994  | 16.3 | 127 | 3.9 |
| 2020 | 5 | 3 | 5  | 15.7 | 0   | 0   | 0   | 994  | 16.1 | 125 | 4   |
| 2020 | 5 | 3 | 6  | 15.5 | 7   | 0   | 7   | 994  | 16   | 127 | 4.2 |
| 2020 | 5 | 3 | 7  | 16   | 29  | 0   | 29  | 994  | 16.9 | 129 | 4.7 |
| 2020 | 5 | 3 | 8  | 17   | 57  | 0   | 57  | 994  | 18.4 | 130 | 4.8 |
| 2020 | 5 | 3 | 9  | 17.9 | 261 | 45  | 290 | 994  | 20.1 | 132 | 4.8 |
| 2020 | 5 | 3 | 10 | 18.6 | 123 | 0   | 123 | 993  | 21.3 | 133 | 4.6 |
| 2020 | 5 | 3 | 11 | 19.2 | 335 | 25  | 357 | 993  | 21.8 | 130 | 4.5 |
| 2020 | 5 | 3 | 12 | 19.6 | 418 | 48  | 463 | 992  | 22.1 | 123 | 4.7 |
| 2020 | 5 | 3 | 13 | 19.6 | 168 | 6   | 174 | 991  | 22   | 117 | 4.7 |
| 2020 | 5 | 3 | 14 | 19.4 | 239 | 12  | 249 | 991  | 22   | 116 | 4.6 |
| 2020 | 5 | 3 | 15 | 19.1 | 342 | 54  | 385 | 991  | 21.5 | 117 | 4.2 |
| 2020 | 5 | 3 | 16 | 18.8 | 52  | 0   | 52  | 991  | 20.8 | 114 | 4   |
| 2020 | 5 | 3 | 17 | 18.6 | 184 | 60  | 212 | 991  | 19.8 | 108 | 3.3 |
| 2020 | 5 | 3 | 18 | 18.3 | 48  | 0   | 48  | 992  | 18.9 | 101 | 2.3 |
| 2020 | 5 | 3 | 19 | 17.7 | 12  | 0   | 12  | 992  | 17.8 | 93  | 1.3 |

|      |   |   |    |      |     |     |     |      |      |     |     |
|------|---|---|----|------|-----|-----|-----|------|------|-----|-----|
| 2020 | 5 | 3 | 20 | 17.1 | 0   | 0   | 0   | 993  | 17.1 | 84  | 1   |
| 2020 | 5 | 3 | 21 | 16.5 | 0   | 0   | 0   | 994  | 16.5 | 76  | 0.9 |
| 2020 | 5 | 3 | 22 | 16   | 0   | 0   | 0   | 994  | 16   | 68  | 0.8 |
| 2020 | 5 | 3 | 23 | 15.5 | 0   | 0   | 0   | 994  | 15.5 | 43  | 0.8 |
| 2020 | 5 | 4 | 0  | 14.8 | 0   | 0   | 0   | 994  | 14.8 | 17  | 0.9 |
| 2020 | 5 | 4 | 1  | 14.4 | 0   | 0   | 0   | 994  | 14.4 | 4   | 1   |
| 2020 | 5 | 4 | 2  | 13.9 | 0   | 0   | 0   | 993  | 13.9 | 357 | 1.1 |
| 2020 | 5 | 4 | 3  | 13.5 | 0   | 0   | 0   | 994  | 13.5 | 349 | 1.2 |
| 2020 | 5 | 4 | 4  | 13.4 | 0   | 0   | 0   | 994  | 13.4 | 344 | 1.4 |
| 2020 | 5 | 4 | 5  | 13.5 | 0   | 0   | 0   | 995  | 13.5 | 343 | 1.5 |
| 2020 | 5 | 4 | 6  | 14.4 | 16  | 11  | 17  | 995  | 14.7 | 344 | 2.3 |
| 2020 | 5 | 4 | 7  | 15.1 | 120 | 210 | 175 | 996  | 16.1 | 342 | 2.5 |
| 2020 | 5 | 4 | 8  | 16   | 157 | 10  | 162 | 996  | 18.6 | 337 | 2.7 |
| 2020 | 5 | 4 | 9  | 16.6 | 223 | 548 | 573 | 997  | 21.3 | 332 | 3.5 |
| 2020 | 5 | 4 | 10 | 17.1 | 256 | 607 | 731 | 997  | 22.7 | 328 | 3.7 |
| 2020 | 5 | 4 | 11 | 17.5 | 276 | 647 | 850 | 996  | 23.6 | 324 | 3.5 |
| 2020 | 5 | 4 | 12 | 17.8 | 253 | 715 | 925 | 996  | 24.4 | 317 | 3.5 |
| 2020 | 5 | 4 | 13 | 17.8 | 390 | 495 | 854 | 996  | 24.7 | 312 | 3.9 |
| 2020 | 5 | 4 | 14 | 17.5 | 249 | 691 | 861 | 996  | 24.4 | 311 | 4.2 |
| 2020 | 5 | 4 | 15 | 17   | 256 | 579 | 709 | 996  | 23.7 | 308 | 4   |
| 2020 | 5 | 4 | 16 | 16.3 | 219 | 555 | 573 | 996  | 22.4 | 309 | 4.4 |
| 2020 | 5 | 4 | 17 | 15   | 187 | 408 | 375 | 997  | 20.1 | 314 | 4.4 |
| 2020 | 5 | 4 | 18 | 13.6 | 97  | 164 | 140 | 998  | 17.2 | 318 | 3.4 |
| 2020 | 5 | 4 | 19 | 12.6 | 16  | 17  | 17  | 998  | 14.4 | 320 | 2   |
| 2020 | 5 | 4 | 20 | 11.7 | 0   | 0   | 0   | 998  | 12.9 | 322 | 1.7 |
| 2020 | 5 | 4 | 21 | 11   | 0   | 0   | 0   | 999  | 11.9 | 327 | 1.9 |
| 2020 | 5 | 4 | 22 | 10.4 | 0   | 0   | 0   | 1000 | 11   | 333 | 1.8 |
| 2020 | 5 | 4 | 23 | 10.1 | 0   | 0   | 0   | 999  | 10.3 | 348 | 1.2 |
| 2020 | 5 | 5 | 0  | 10   | 0   | 0   | 0   | 999  | 10   | 13  | 0.8 |
| 2020 | 5 | 5 | 1  | 10.1 | 0   | 0   | 0   | 999  | 10.1 | 57  | 0.8 |
| 2020 | 5 | 5 | 2  | 10.2 | 0   | 0   | 0   | 998  | 10.2 | 95  | 1   |
| 2020 | 5 | 5 | 3  | 10.5 | 0   | 0   | 0   | 998  | 10.5 | 111 | 1.2 |
| 2020 | 5 | 5 | 4  | 10.8 | 0   | 0   | 0   | 998  | 10.8 | 119 | 1.5 |
| 2020 | 5 | 5 | 5  | 11   | 0   | 0   | 0   | 998  | 11   | 119 | 1.8 |
| 2020 | 5 | 5 | 6  | 11.5 | 14  | 11  | 15  | 999  | 12.5 | 117 | 2.7 |
| 2020 | 5 | 5 | 7  | 11.6 | 131 | 129 | 166 | 999  | 13.9 | 111 | 3.3 |
| 2020 | 5 | 5 | 8  | 12.3 | 195 | 116 | 249 | 1000 | 15.6 | 107 | 3.4 |
| 2020 | 5 | 5 | 9  | 13.2 | 350 | 292 | 537 | 1000 | 17   | 106 | 3.1 |
| 2020 | 5 | 5 | 10 | 14   | 379 | 145 | 493 | 999  | 17.9 | 106 | 2.9 |
| 2020 | 5 | 5 | 11 | 14.9 | 419 | 309 | 694 | 998  | 19.3 | 115 | 3.1 |
| 2020 | 5 | 5 | 12 | 15.6 | 473 | 222 | 682 | 999  | 20.2 | 131 | 3.2 |
| 2020 | 5 | 5 | 13 | 16   | 437 | 61  | 494 | 999  | 20.4 | 136 | 2.6 |
| 2020 | 5 | 5 | 14 | 16   | 425 | 285 | 678 | 999  | 20.2 | 125 | 1.6 |
| 2020 | 5 | 5 | 15 | 15.8 | 378 | 177 | 517 | 999  | 19.8 | 73  | 0.8 |
| 2020 | 5 | 5 | 16 | 16   | 157 | 0   | 157 | 998  | 19.3 | 22  | 1.1 |
| 2020 | 5 | 5 | 17 | 16.1 | 161 | 14  | 167 | 998  | 18.5 | 15  | 1.2 |
| 2020 | 5 | 5 | 18 | 16.3 | 92  | 16  | 97  | 998  | 17.4 | 33  | 0.6 |
| 2020 | 5 | 5 | 19 | 15   | 17  | 0   | 17  | 997  | 16.1 | 95  | 0.8 |
| 2020 | 5 | 5 | 20 | 14.4 | 0   | 0   | 0   | 998  | 15.5 | 143 | 0.9 |
| 2020 | 5 | 5 | 21 | 14.3 | 0   | 0   | 0   | 999  | 14.5 | 163 | 1   |

|      |   |   |    |      |     |     |      |      |      |     |     |
|------|---|---|----|------|-----|-----|------|------|------|-----|-----|
| 2020 | 5 | 5 | 22 | 14.1 | 0   | 0   | 0    | 999  | 14.1 | 168 | 0.9 |
| 2020 | 5 | 5 | 23 | 14.2 | 0   | 0   | 0    | 999  | 14.3 | 155 | 0.8 |
| 2020 | 5 | 6 | 0  | 14   | 0   | 0   | 0    | 999  | 14.2 | 138 | 1.1 |
| 2020 | 5 | 6 | 1  | 13.1 | 0   | 0   | 0    | 998  | 13.1 | 134 | 1.1 |
| 2020 | 5 | 6 | 2  | 12.6 | 0   | 0   | 0    | 998  | 12.6 | 125 | 1   |
| 2020 | 5 | 6 | 3  | 12.8 | 0   | 0   | 0    | 999  | 12.8 | 88  | 0.7 |
| 2020 | 5 | 6 | 4  | 12.4 | 0   | 0   | 0    | 999  | 12.4 | 34  | 0.8 |
| 2020 | 5 | 6 | 5  | 11.8 | 0   | 0   | 0    | 1000 | 11.8 | 25  | 1   |
| 2020 | 5 | 6 | 6  | 13.3 | 21  | 30  | 23   | 1000 | 13.4 | 24  | 1.3 |
| 2020 | 5 | 6 | 7  | 14.2 | 113 | 280 | 188  | 1001 | 16   | 18  | 2.6 |
| 2020 | 5 | 6 | 8  | 14.8 | 164 | 497 | 397  | 1001 | 18.6 | 14  | 3.3 |
| 2020 | 5 | 6 | 9  | 14.7 | 183 | 651 | 602  | 1001 | 20.6 | 22  | 3.6 |
| 2020 | 5 | 6 | 10 | 14.2 | 192 | 749 | 782  | 1001 | 22.3 | 32  | 3.5 |
| 2020 | 5 | 6 | 11 | 13.9 | 203 | 795 | 911  | 1000 | 23.9 | 42  | 3.2 |
| 2020 | 5 | 6 | 12 | 13.5 | 188 | 844 | 983  | 1000 | 25.2 | 51  | 2.9 |
| 2020 | 5 | 6 | 13 | 13.1 | 201 | 824 | 977  | 999  | 25.9 | 61  | 2.9 |
| 2020 | 5 | 6 | 14 | 12.8 | 192 | 808 | 910  | 998  | 26.3 | 72  | 2.9 |
| 2020 | 5 | 6 | 15 | 12.4 | 170 | 790 | 791  | 998  | 26.4 | 86  | 2.5 |
| 2020 | 5 | 6 | 16 | 12.6 | 153 | 724 | 617  | 998  | 25.9 | 108 | 1.9 |
| 2020 | 5 | 6 | 17 | 12.9 | 126 | 615 | 411  | 999  | 25   | 141 | 1.6 |
| 2020 | 5 | 6 | 18 | 15.9 | 91  | 408 | 200  | 999  | 21.9 | 170 | 1.3 |
| 2020 | 5 | 6 | 19 | 14.7 | 23  | 65  | 27   | 1000 | 17.6 | 191 | 1.1 |
| 2020 | 5 | 6 | 20 | 14.2 | 0   | 0   | 0    | 1001 | 15.8 | 186 | 1   |
| 2020 | 5 | 6 | 21 | 13.9 | 0   | 0   | 0    | 1002 | 14.7 | 169 | 0.8 |
| 2020 | 5 | 6 | 22 | 13.5 | 0   | 0   | 0    | 1003 | 13.9 | 145 | 0.9 |
| 2020 | 5 | 6 | 23 | 12.7 | 0   | 0   | 0    | 1003 | 13.1 | 120 | 1.1 |
| 2020 | 5 | 7 | 0  | 11.2 | 0   | 0   | 0    | 1003 | 12.3 | 101 | 1.4 |
| 2020 | 5 | 7 | 1  | 9.5  | 0   | 0   | 0    | 1003 | 11.3 | 94  | 1.7 |
| 2020 | 5 | 7 | 2  | 8.3  | 0   | 0   | 0    | 1003 | 10.6 | 92  | 2.2 |
| 2020 | 5 | 7 | 3  | 7.6  | 0   | 0   | 0    | 1004 | 10.2 | 92  | 2.6 |
| 2020 | 5 | 7 | 4  | 7.2  | 0   | 0   | 0    | 1004 | 10   | 93  | 3   |
| 2020 | 5 | 7 | 5  | 7.2  | 0   | 0   | 0    | 1004 | 9.8  | 97  | 3.3 |
| 2020 | 5 | 7 | 6  | 7.4  | 26  | 106 | 34   | 1004 | 10.6 | 99  | 4.1 |
| 2020 | 5 | 7 | 7  | 7.8  | 84  | 486 | 217  | 1005 | 12.8 | 100 | 4.7 |
| 2020 | 5 | 7 | 8  | 7.5  | 115 | 686 | 437  | 1005 | 15.3 | 101 | 5.3 |
| 2020 | 5 | 7 | 9  | 7.3  | 132 | 795 | 646  | 1004 | 17.1 | 105 | 5.7 |
| 2020 | 5 | 7 | 10 | 7.7  | 143 | 859 | 822  | 1004 | 18.5 | 106 | 5.8 |
| 2020 | 5 | 7 | 11 | 8.1  | 146 | 900 | 949  | 1004 | 19.9 | 106 | 5.9 |
| 2020 | 5 | 7 | 12 | 8.2  | 352 | 575 | 895  | 1004 | 21   | 106 | 5.9 |
| 2020 | 5 | 7 | 13 | 8.2  | 135 | 936 | 1018 | 1004 | 21.6 | 107 | 5.4 |
| 2020 | 5 | 7 | 14 | 8    | 133 | 920 | 952  | 1004 | 21.8 | 106 | 4.5 |
| 2020 | 5 | 7 | 15 | 8    | 145 | 854 | 817  | 1004 | 21.8 | 105 | 3.7 |
| 2020 | 5 | 7 | 16 | 7.8  | 212 | 502 | 535  | 1004 | 21.5 | 105 | 3.2 |
| 2020 | 5 | 7 | 17 | 9.1  | 110 | 691 | 432  | 1004 | 20.4 | 110 | 2.6 |
| 2020 | 5 | 7 | 18 | 11.6 | 78  | 520 | 217  | 1004 | 17.8 | 115 | 1.7 |
| 2020 | 5 | 7 | 19 | 9.9  | 25  | 149 | 35   | 1004 | 13.9 | 118 | 1.6 |
| 2020 | 5 | 7 | 20 | 8.8  | 0   | 0   | 0    | 1004 | 12.5 | 119 | 1.9 |
| 2020 | 5 | 7 | 21 | 8.5  | 0   | 0   | 0    | 1005 | 11.6 | 115 | 2.2 |
| 2020 | 5 | 7 | 22 | 8.5  | 0   | 0   | 0    | 1005 | 11.3 | 111 | 2.5 |
| 2020 | 5 | 7 | 23 | 8.5  | 0   | 0   | 0    | 1005 | 11   | 108 | 2.8 |

|      |   |    |    |      |     |     |     |      |      |     |     |
|------|---|----|----|------|-----|-----|-----|------|------|-----|-----|
| 2020 | 5 | 8  | 0  | 8.3  | 0   | 0   | 0   | 1005 | 10.2 | 109 | 2.9 |
| 2020 | 5 | 8  | 1  | 8.2  | 0   | 0   | 0   | 1005 | 9.5  | 111 | 3.1 |
| 2020 | 5 | 8  | 2  | 8.6  | 0   | 0   | 0   | 1004 | 9.4  | 111 | 3.3 |
| 2020 | 5 | 8  | 3  | 9    | 0   | 0   | 0   | 1004 | 9.3  | 109 | 3.5 |
| 2020 | 5 | 8  | 4  | 9.1  | 0   | 0   | 0   | 1003 | 9.2  | 108 | 3.5 |
| 2020 | 5 | 8  | 5  | 9.1  | 0   | 0   | 0   | 1003 | 9.2  | 108 | 3.6 |
| 2020 | 5 | 8  | 6  | 9.3  | 24  | 23  | 26  | 1003 | 10.5 | 107 | 3.9 |
| 2020 | 5 | 8  | 7  | 10.2 | 99  | 221 | 160 | 1003 | 13   | 107 | 4.1 |
| 2020 | 5 | 8  | 8  | 11.1 | 102 | 713 | 438 | 1003 | 16.3 | 119 | 4.4 |
| 2020 | 5 | 8  | 9  | 11.7 | 127 | 786 | 636 | 1004 | 18.6 | 125 | 3.7 |
| 2020 | 5 | 8  | 10 | 12.8 | 150 | 821 | 800 | 1003 | 20.6 | 134 | 3.5 |
| 2020 | 5 | 8  | 11 | 14   | 321 | 574 | 834 | 1003 | 22   | 147 | 3.4 |
| 2020 | 5 | 8  | 12 | 14.7 | 388 | 506 | 866 | 1002 | 22.7 | 151 | 3.7 |
| 2020 | 5 | 8  | 13 | 15   | 480 | 168 | 638 | 1001 | 22.9 | 150 | 4   |
| 2020 | 5 | 8  | 14 | 15.1 | 220 | 744 | 883 | 1000 | 22.8 | 147 | 4.4 |
| 2020 | 5 | 8  | 15 | 14.8 | 379 | 135 | 486 | 1000 | 21.5 | 147 | 4.3 |
| 2020 | 5 | 8  | 16 | 14.8 | 271 | 318 | 476 | 1000 | 20   | 144 | 3.8 |
| 2020 | 5 | 8  | 17 | 15   | 119 | 0   | 119 | 1000 | 19.2 | 139 | 3.6 |
| 2020 | 5 | 8  | 18 | 14.8 | 9   | 0   | 9   | 1000 | 18   | 137 | 3.2 |
| 2020 | 5 | 8  | 19 | 14.7 | 4   | 0   | 4   | 1000 | 17   | 129 | 3.3 |
| 2020 | 5 | 8  | 20 | 14.8 | 0   | 0   | 0   | 1000 | 16.4 | 129 | 3.4 |
| 2020 | 5 | 8  | 21 | 15   | 0   | 0   | 0   | 1001 | 16.4 | 145 | 3.7 |
| 2020 | 5 | 8  | 22 | 15.5 | 0   | 0   | 0   | 1000 | 16.4 | 142 | 5   |
| 2020 | 5 | 8  | 23 | 16.1 | 0   | 0   | 0   | 998  | 16.8 | 140 | 5.9 |
| 2020 | 5 | 9  | 0  | 16.4 | 0   | 0   | 0   | 997  | 17   | 144 | 7.2 |
| 2020 | 5 | 9  | 1  | 16.4 | 0   | 0   | 0   | 995  | 17.1 | 146 | 8.3 |
| 2020 | 5 | 9  | 2  | 16.2 | 0   | 0   | 0   | 994  | 17   | 146 | 8.8 |
| 2020 | 5 | 9  | 3  | 16.3 | 0   | 0   | 0   | 994  | 17   | 153 | 8.3 |
| 2020 | 5 | 9  | 4  | 16.6 | 0   | 0   | 0   | 993  | 17.3 | 156 | 8.1 |
| 2020 | 5 | 9  | 5  | 17.1 | 0   | 0   | 0   | 992  | 17.6 | 158 | 7.4 |
| 2020 | 5 | 9  | 6  | 17.5 | 9   | 0   | 9   | 992  | 18.1 | 156 | 7.1 |
| 2020 | 5 | 9  | 7  | 18.2 | 50  | 0   | 50  | 991  | 19   | 161 | 7   |
| 2020 | 5 | 9  | 8  | 19   | 38  | 0   | 38  | 991  | 20.1 | 173 | 6.4 |
| 2020 | 5 | 9  | 9  | 19.2 | 117 | 0   | 117 | 992  | 20.4 | 187 | 5.5 |
| 2020 | 5 | 9  | 10 | 19.4 | 72  | 0   | 72  | 992  | 21.1 | 203 | 5   |
| 2020 | 5 | 9  | 11 | 19.3 | 75  | 0   | 75  | 992  | 21.9 | 217 | 4.5 |
| 2020 | 5 | 9  | 12 | 19.2 | 99  | 0   | 99  | 991  | 22.4 | 228 | 4.1 |
| 2020 | 5 | 9  | 13 | 18.8 | 274 | 680 | 918 | 991  | 22.8 | 234 | 4.3 |
| 2020 | 5 | 9  | 14 | 17.9 | 110 | 0   | 110 | 991  | 22.6 | 236 | 5   |
| 2020 | 5 | 9  | 15 | 16.6 | 220 | 672 | 751 | 992  | 21.5 | 238 | 5.3 |
| 2020 | 5 | 9  | 16 | 15.3 | 188 | 624 | 592 | 992  | 20   | 240 | 5.1 |
| 2020 | 5 | 9  | 17 | 14.3 | 110 | 0   | 110 | 992  | 18.4 | 242 | 4.7 |
| 2020 | 5 | 9  | 18 | 13.5 | 78  | 0   | 78  | 993  | 16.6 | 244 | 4.1 |
| 2020 | 5 | 9  | 19 | 13   | 27  | 64  | 32  | 993  | 14.8 | 244 | 3.2 |
| 2020 | 5 | 9  | 20 | 12.7 | 0   | 0   | 0   | 994  | 13.8 | 240 | 3   |
| 2020 | 5 | 9  | 21 | 12.5 | 0   | 0   | 0   | 994  | 13.2 | 234 | 2.9 |
| 2020 | 5 | 9  | 22 | 12.4 | 0   | 0   | 0   | 995  | 13.2 | 230 | 3   |
| 2020 | 5 | 9  | 23 | 12.5 | 0   | 0   | 0   | 994  | 13.2 | 221 | 2.8 |
| 2020 | 5 | 10 | 0  | 12.5 | 0   | 0   | 0   | 994  | 13.1 | 224 | 3.1 |
| 2020 | 5 | 10 | 1  | 12.5 | 0   | 0   | 0   | 994  | 13.1 | 233 | 3.5 |

|      |   |    |    |      |     |     |     |     |      |     |     |
|------|---|----|----|------|-----|-----|-----|-----|------|-----|-----|
| 2020 | 5 | 10 | 2  | 12.6 | 0   | 0   | 0   | 994 | 13.1 | 240 | 3.5 |
| 2020 | 5 | 10 | 3  | 12.6 | 0   | 0   | 0   | 994 | 13.1 | 247 | 3.4 |
| 2020 | 5 | 10 | 4  | 12.6 | 0   | 0   | 0   | 994 | 13.1 | 253 | 3.1 |
| 2020 | 5 | 10 | 5  | 12.6 | 0   | 0   | 0   | 994 | 13   | 257 | 3   |
| 2020 | 5 | 10 | 6  | 12.6 | 30  | 74  | 36  | 994 | 13.3 | 263 | 3.3 |
| 2020 | 5 | 10 | 7  | 12.8 | 19  | 0   | 19  | 995 | 14   | 277 | 4   |
| 2020 | 5 | 10 | 8  | 13.1 | 36  | 0   | 36  | 995 | 15   | 290 | 4.3 |
| 2020 | 5 | 10 | 9  | 13.5 | 70  | 0   | 70  | 995 | 16.3 | 299 | 4.5 |
| 2020 | 5 | 10 | 10 | 13.8 | 158 | 3   | 161 | 996 | 17.6 | 304 | 4.7 |
| 2020 | 5 | 10 | 11 | 14.1 | 227 | 11  | 237 | 996 | 18.8 | 305 | 4.8 |
| 2020 | 5 | 10 | 12 | 14.2 | 117 | 0   | 117 | 996 | 19.6 | 309 | 5   |
| 2020 | 5 | 10 | 13 | 14.2 | 146 | 3   | 149 | 996 | 20.1 | 311 | 5   |
| 2020 | 5 | 10 | 14 | 14   | 166 | 5   | 171 | 996 | 20.2 | 310 | 4.8 |
| 2020 | 5 | 10 | 15 | 13.8 | 194 | 7   | 200 | 996 | 20   | 307 | 4.5 |
| 2020 | 5 | 10 | 16 | 13.5 | 296 | 145 | 390 | 996 | 19.5 | 304 | 4.3 |
| 2020 | 5 | 10 | 17 | 13.2 | 137 | 0   | 137 | 996 | 18.3 | 299 | 4   |
| 2020 | 5 | 10 | 18 | 12.9 | 96  | 399 | 205 | 997 | 16.6 | 296 | 3.3 |
| 2020 | 5 | 10 | 19 | 12.6 | 28  | 90  | 35  | 997 | 14.1 | 297 | 2.1 |
| 2020 | 5 | 10 | 20 | 12.1 | 0   | 0   | 0   | 998 | 12.6 | 299 | 1.6 |
| 2020 | 5 | 10 | 21 | 11.4 | 0   | 0   | 0   | 999 | 11.4 | 300 | 1.2 |
| 2020 | 5 | 10 | 22 | 10.6 | 0   | 0   | 0   | 999 | 10.6 | 297 | 1.1 |
| 2020 | 5 | 10 | 23 | 10.1 | 0   | 0   | 0   | 999 | 10.1 | 294 | 1.1 |
| 2020 | 5 | 11 | 0  | 9.7  | 0   | 0   | 0   | 999 | 9.7  | 293 | 1.2 |
| 2020 | 5 | 11 | 1  | 9.5  | 0   | 0   | 0   | 999 | 9.5  | 291 | 1.2 |
| 2020 | 5 | 11 | 2  | 9.3  | 0   | 0   | 0   | 999 | 9.3  | 288 | 1.2 |
| 2020 | 5 | 11 | 3  | 9.1  | 0   | 0   | 0   | 999 | 9.1  | 286 | 1.2 |
| 2020 | 5 | 11 | 4  | 9    | 0   | 0   | 0   | 999 | 9    | 284 | 1.2 |
| 2020 | 5 | 11 | 5  | 8.8  | 0   | 0   | 0   | 999 | 8.8  | 281 | 1.3 |
| 2020 | 5 | 11 | 6  | 11.4 | 31  | 78  | 38  | 999 | 11.4 | 284 | 1.5 |
| 2020 | 5 | 11 | 7  | 12.8 | 107 | 379 | 214 | 999 | 14.4 | 283 | 2.3 |
| 2020 | 5 | 11 | 8  | 13.2 | 144 | 591 | 427 | 999 | 17.5 | 285 | 3   |
| 2020 | 5 | 11 | 9  | 13.1 | 162 | 717 | 631 | 999 | 19.9 | 289 | 3.9 |
| 2020 | 5 | 11 | 10 | 12.8 | 170 | 793 | 802 | 999 | 21.3 | 288 | 4.1 |
| 2020 | 5 | 11 | 11 | 12.5 | 175 | 836 | 926 | 998 | 22.4 | 285 | 4   |
| 2020 | 5 | 11 | 12 | 12.4 | 195 | 826 | 979 | 998 | 23   | 281 | 3.8 |
| 2020 | 5 | 11 | 13 | 12.4 | 203 | 811 | 972 | 997 | 23.4 | 279 | 3.6 |
| 2020 | 5 | 11 | 14 | 12.1 | 200 | 786 | 904 | 996 | 23.4 | 278 | 3.6 |
| 2020 | 5 | 11 | 15 | 12   | 192 | 741 | 780 | 996 | 22.9 | 276 | 3.5 |
| 2020 | 5 | 11 | 16 | 12   | 178 | 665 | 610 | 995 | 22.1 | 274 | 3.4 |
| 2020 | 5 | 11 | 17 | 12.4 | 152 | 543 | 409 | 995 | 20.6 | 269 | 3   |
| 2020 | 5 | 11 | 18 | 13.9 | 107 | 347 | 203 | 995 | 18.2 | 262 | 1.9 |
| 2020 | 5 | 11 | 19 | 13.7 | 20  | 0   | 20  | 995 | 15.6 | 252 | 1.4 |
| 2020 | 5 | 11 | 20 | 13.5 | 0   | 0   | 0   | 995 | 14.7 | 238 | 1.4 |
| 2020 | 5 | 11 | 21 | 13.2 | 0   | 0   | 0   | 995 | 14.2 | 227 | 1.4 |
| 2020 | 5 | 11 | 22 | 12.9 | 0   | 0   | 0   | 995 | 13.6 | 221 | 1.5 |
| 2020 | 5 | 11 | 23 | 12.4 | 0   | 0   | 0   | 995 | 12.4 | 227 | 1.6 |
| 2020 | 5 | 12 | 0  | 11.9 | 0   | 0   | 0   | 995 | 11.9 | 244 | 2   |
| 2020 | 5 | 12 | 1  | 12.3 | 0   | 0   | 0   | 994 | 12.3 | 255 | 2.5 |
| 2020 | 5 | 12 | 2  | 11.7 | 0   | 0   | 0   | 994 | 11.7 | 264 | 2.1 |
| 2020 | 5 | 12 | 3  | 11   | 0   | 0   | 0   | 994 | 11   | 269 | 1.8 |

|      |   |    |    |      |     |     |      |      |      |     |     |
|------|---|----|----|------|-----|-----|------|------|------|-----|-----|
| 2020 | 5 | 12 | 4  | 9.9  | 0   | 0   | 0    | 994  | 9.9  | 269 | 1.7 |
| 2020 | 5 | 12 | 5  | 9    | 0   | 0   | 0    | 994  | 9    | 267 | 1.6 |
| 2020 | 5 | 12 | 6  | 11.1 | 32  | 163 | 45   | 994  | 11.2 | 258 | 2.2 |
| 2020 | 5 | 12 | 7  | 10.6 | 80  | 524 | 230  | 994  | 13.6 | 258 | 3.1 |
| 2020 | 5 | 12 | 8  | 9.9  | 107 | 701 | 444  | 995  | 15.8 | 259 | 3.7 |
| 2020 | 5 | 12 | 9  | 9.3  | 125 | 794 | 646  | 994  | 18   | 254 | 4.2 |
| 2020 | 5 | 12 | 10 | 9.2  | 140 | 845 | 815  | 994  | 19.9 | 248 | 5   |
| 2020 | 5 | 12 | 11 | 9.2  | 157 | 859 | 930  | 994  | 21.2 | 248 | 6   |
| 2020 | 5 | 12 | 12 | 8.7  | 201 | 815 | 977  | 994  | 21.7 | 252 | 7.1 |
| 2020 | 5 | 12 | 13 | 9.3  | 247 | 747 | 957  | 993  | 20.9 | 260 | 7.5 |
| 2020 | 5 | 12 | 14 | 11.2 | 280 | 669 | 880  | 994  | 19.7 | 269 | 6.7 |
| 2020 | 5 | 12 | 15 | 11.8 | 284 | 598 | 760  | 994  | 19   | 281 | 5.7 |
| 2020 | 5 | 12 | 16 | 10.6 | 242 | 556 | 604  | 994  | 18.1 | 296 | 5.2 |
| 2020 | 5 | 12 | 17 | 8.3  | 167 | 532 | 420  | 995  | 16.5 | 306 | 4.9 |
| 2020 | 5 | 12 | 18 | 7.6  | 92  | 470 | 224  | 996  | 14.3 | 309 | 4   |
| 2020 | 5 | 12 | 19 | 8.3  | 29  | 191 | 44   | 997  | 11.5 | 306 | 2.7 |
| 2020 | 5 | 12 | 20 | 8.9  | 0   | 0   | 0    | 998  | 10.3 | 303 | 2.4 |
| 2020 | 5 | 12 | 21 | 9.3  | 0   | 0   | 0    | 999  | 9.7  | 301 | 2.2 |
| 2020 | 5 | 12 | 22 | 9.2  | 0   | 0   | 0    | 999  | 9.2  | 296 | 1.9 |
| 2020 | 5 | 12 | 23 | 8.8  | 0   | 0   | 0    | 1000 | 8.8  | 291 | 1.8 |
| 2020 | 5 | 13 | 0  | 8.6  | 0   | 0   | 0    | 1000 | 8.6  | 290 | 1.9 |
| 2020 | 5 | 13 | 1  | 8.3  | 0   | 0   | 0    | 1001 | 8.3  | 292 | 1.9 |
| 2020 | 5 | 13 | 2  | 7.8  | 0   | 0   | 0    | 1001 | 7.8  | 296 | 1.7 |
| 2020 | 5 | 13 | 3  | 7.4  | 0   | 0   | 0    | 1002 | 7.4  | 300 | 1.5 |
| 2020 | 5 | 13 | 4  | 7.2  | 0   | 0   | 0    | 1002 | 7.2  | 302 | 1.3 |
| 2020 | 5 | 13 | 5  | 7.5  | 0   | 0   | 0    | 1002 | 7.5  | 299 | 1.2 |
| 2020 | 5 | 13 | 6  | 9.9  | 31  | 206 | 49   | 1003 | 9.9  | 288 | 1   |
| 2020 | 5 | 13 | 7  | 9.7  | 73  | 579 | 239  | 1004 | 12.9 | 276 | 1.4 |
| 2020 | 5 | 13 | 8  | 7    | 94  | 753 | 457  | 1004 | 15.7 | 288 | 1.9 |
| 2020 | 5 | 13 | 9  | 6.8  | 110 | 837 | 660  | 1005 | 17.6 | 281 | 2.2 |
| 2020 | 5 | 13 | 10 | 7.4  | 121 | 887 | 831  | 1005 | 19   | 277 | 2.6 |
| 2020 | 5 | 13 | 11 | 8.1  | 127 | 918 | 954  | 1005 | 20   | 276 | 3   |
| 2020 | 5 | 13 | 12 | 8.6  | 139 | 915 | 1010 | 1005 | 20.6 | 278 | 3.2 |
| 2020 | 5 | 13 | 13 | 8.9  | 140 | 912 | 1008 | 1005 | 21   | 279 | 3.3 |
| 2020 | 5 | 13 | 14 | 8.8  | 141 | 895 | 944  | 1004 | 21.1 | 279 | 3.1 |
| 2020 | 5 | 13 | 15 | 8.5  | 138 | 854 | 818  | 1004 | 20.9 | 278 | 2.9 |
| 2020 | 5 | 13 | 16 | 8.3  | 131 | 783 | 642  | 1004 | 20.4 | 276 | 2.6 |
| 2020 | 5 | 13 | 17 | 8.5  | 122 | 645 | 429  | 1004 | 19.5 | 267 | 2.1 |
| 2020 | 5 | 13 | 18 | 11.3 | 96  | 397 | 207  | 1004 | 17.2 | 258 | 1.2 |
| 2020 | 5 | 13 | 19 | 9.8  | 25  | 52  | 29   | 1005 | 13.7 | 256 | 1.1 |
| 2020 | 5 | 13 | 20 | 8.2  | 0   | 0   | 0    | 1005 | 12.8 | 256 | 1.1 |
| 2020 | 5 | 13 | 21 | 7    | 0   | 0   | 0    | 1006 | 12.8 | 252 | 1.1 |
| 2020 | 5 | 13 | 22 | 6.1  | 0   | 0   | 0    | 1006 | 12.7 | 239 | 1   |
| 2020 | 5 | 13 | 23 | 5.6  | 0   | 0   | 0    | 1006 | 12.2 | 225 | 0.8 |
| 2020 | 5 | 14 | 0  | 4.9  | 0   | 0   | 0    | 1005 | 12.2 | 186 | 0.7 |
| 2020 | 5 | 14 | 1  | 5.1  | 0   | 0   | 0    | 1005 | 12.1 | 141 | 0.9 |
| 2020 | 5 | 14 | 2  | 5.2  | 0   | 0   | 0    | 1005 | 11.4 | 137 | 1.1 |
| 2020 | 5 | 14 | 3  | 4.6  | 0   | 0   | 0    | 1005 | 11.1 | 142 | 1.2 |
| 2020 | 5 | 14 | 4  | 4.6  | 0   | 0   | 0    | 1005 | 10.9 | 144 | 1.2 |
| 2020 | 5 | 14 | 5  | 5.4  | 0   | 0   | 0    | 1005 | 10.8 | 143 | 1.2 |



|      |   |    |    |      |     |     |     |      |      |     |     |
|------|---|----|----|------|-----|-----|-----|------|------|-----|-----|
| 2020 | 5 | 14 | 6  | 7    | 29  | 24  | 31  | 1006 | 11.4 | 142 | 1.1 |
| 2020 | 5 | 14 | 7  | 9.2  | 108 | 183 | 161 | 1006 | 14.3 | 143 | 1.2 |
| 2020 | 5 | 14 | 8  | 8.3  | 191 | 286 | 329 | 1006 | 15.9 | 147 | 1.7 |
| 2020 | 5 | 14 | 9  | 8.7  | 206 | 597 | 599 | 1006 | 16.6 | 145 | 1.7 |
| 2020 | 5 | 14 | 10 | 8.5  | 234 | 661 | 764 | 1005 | 20   | 150 | 2.6 |
| 2020 | 5 | 14 | 11 | 8.7  | 436 | 268 | 678 | 1005 | 22.2 | 156 | 2.9 |
| 2020 | 5 | 14 | 12 | 9.2  | 443 | 62  | 503 | 1004 | 23.2 | 149 | 3.3 |
| 2020 | 5 | 14 | 13 | 9.7  | 401 | 469 | 848 | 1004 | 23.7 | 147 | 3.4 |
| 2020 | 5 | 14 | 14 | 9.8  | 366 | 441 | 763 | 1003 | 23.7 | 145 | 3.4 |
| 2020 | 5 | 14 | 15 | 9.6  | 270 | 556 | 714 | 1003 | 23.2 | 146 | 3.2 |
| 2020 | 5 | 14 | 16 | 10.1 | 255 | 399 | 516 | 1002 | 22.3 | 147 | 2.8 |
| 2020 | 5 | 14 | 17 | 12   | 170 | 383 | 353 | 1002 | 20.5 | 138 | 1.8 |
| 2020 | 5 | 14 | 18 | 13.4 | 107 | 143 | 148 | 1001 | 17.7 | 132 | 1.3 |
| 2020 | 5 | 14 | 19 | 11.8 | 28  | 37  | 31  | 1001 | 15.7 | 131 | 1.4 |
| 2020 | 5 | 14 | 20 | 11.2 | 0   | 0   | 0   | 1002 | 15   | 136 | 1.5 |
| 2020 | 5 | 14 | 21 | 10.4 | 0   | 0   | 0   | 1002 | 14.6 | 131 | 2.1 |
| 2020 | 5 | 14 | 22 | 9.8  | 0   | 0   | 0   | 1001 | 14.7 | 131 | 2.7 |
| 2020 | 5 | 14 | 23 | 10.4 | 0   | 0   | 0   | 1001 | 14.7 | 135 | 2.8 |
| 2020 | 5 | 15 | 0  | 11.6 | 0   | 0   | 0   | 1000 | 14.8 | 137 | 3.3 |
| 2020 | 5 | 15 | 1  | 13   | 0   | 0   | 0   | 1000 | 15.2 | 138 | 3.8 |
| 2020 | 5 | 15 | 2  | 14.1 | 0   | 0   | 0   | 1000 | 15.6 | 147 | 4.1 |
| 2020 | 5 | 15 | 3  | 14.9 | 0   | 0   | 0   | 1000 | 16   | 156 | 4.4 |
| 2020 | 5 | 15 | 4  | 15.6 | 0   | 0   | 0   | 999  | 16.3 | 155 | 4   |
| 2020 | 5 | 15 | 5  | 16   | 0   | 0   | 0   | 998  | 16.5 | 150 | 4.1 |
| 2020 | 5 | 15 | 6  | 16.5 | 18  | 0   | 18  | 997  | 17   | 147 | 5   |
| 2020 | 5 | 15 | 7  | 16.5 | 61  | 0   | 61  | 996  | 17.3 | 146 | 5.8 |
| 2020 | 5 | 15 | 8  | 15.8 | 64  | 0   | 64  | 996  | 17.2 | 144 | 6.6 |
| 2020 | 5 | 15 | 9  | 15.6 | 79  | 0   | 79  | 995  | 17.4 | 138 | 7   |
| 2020 | 5 | 15 | 10 | 16.1 | 51  | 0   | 51  | 995  | 18.1 | 138 | 7.4 |
| 2020 | 5 | 15 | 11 | 17.3 | 211 | 10  | 220 | 994  | 19.4 | 148 | 7.2 |
| 2020 | 5 | 15 | 12 | 18.4 | 101 | 0   | 101 | 994  | 20.3 | 162 | 5.9 |
| 2020 | 5 | 15 | 13 | 19.3 | 76  | 0   | 76  | 994  | 21.4 | 183 | 4.8 |
| 2020 | 5 | 15 | 14 | 19.7 | 93  | 0   | 93  | 993  | 22   | 205 | 3.9 |
| 2020 | 5 | 15 | 15 | 19.9 | 77  | 0   | 77  | 993  | 22   | 215 | 3.1 |
| 2020 | 5 | 15 | 16 | 19.8 | 238 | 22  | 253 | 993  | 21.5 | 216 | 2.3 |
| 2020 | 5 | 15 | 17 | 19.8 | 56  | 0   | 56  | 994  | 20.9 | 209 | 1.5 |
| 2020 | 5 | 15 | 18 | 19.8 | 54  | 0   | 54  | 994  | 20.1 | 192 | 0.9 |
| 2020 | 5 | 15 | 19 | 18.7 | 14  | 0   | 14  | 994  | 18.7 | 171 | 0.7 |
| 2020 | 5 | 15 | 20 | 18.2 | 0   | 0   | 0   | 994  | 18.2 | 164 | 0.8 |
| 2020 | 5 | 15 | 21 | 17.9 | 0   | 0   | 0   | 995  | 17.9 | 168 | 0.8 |
| 2020 | 5 | 15 | 22 | 17.4 | 0   | 0   | 0   | 995  | 17.4 | 173 | 0.7 |
| 2020 | 5 | 15 | 23 | 17.1 | 0   | 0   | 0   | 995  | 17.1 | 175 | 0.7 |
| 2020 | 5 | 16 | 0  | 16.7 | 0   | 0   | 0   | 995  | 16.7 | 185 | 0.7 |
| 2020 | 5 | 16 | 1  | 16.3 | 0   | 0   | 0   | 995  | 16.3 | 200 | 0.7 |
| 2020 | 5 | 16 | 2  | 16   | 0   | 0   | 0   | 994  | 16.1 | 223 | 0.7 |
| 2020 | 5 | 16 | 3  | 15.6 | 0   | 0   | 0   | 994  | 15.7 | 252 | 0.7 |
| 2020 | 5 | 16 | 4  | 15.1 | 0   | 0   | 0   | 994  | 15.1 | 271 | 0.8 |
| 2020 | 5 | 16 | 5  | 14.7 | 0   | 0   | 0   | 994  | 14.7 | 291 | 0.9 |
| 2020 | 5 | 16 | 6  | 15.2 | 33  | 45  | 38  | 995  | 15.5 | 303 | 1.6 |
| 2020 | 5 | 16 | 7  | 15.6 | 110 | 54  | 126 | 995  | 16.5 | 311 | 1.9 |

|      |   |    |    |      |     |     |     |     |      |     |     |
|------|---|----|----|------|-----|-----|-----|-----|------|-----|-----|
| 2020 | 5 | 16 | 8  | 15.8 | 187 | 459 | 410 | 995 | 17.2 | 314 | 1.8 |
| 2020 | 5 | 16 | 9  | 16.2 | 296 | 91  | 356 | 995 | 18.4 | 315 | 1.8 |
| 2020 | 5 | 16 | 10 | 16.5 | 389 | 171 | 526 | 995 | 20   | 300 | 1.8 |
| 2020 | 5 | 16 | 11 | 16.5 | 452 | 167 | 604 | 995 | 20.8 | 298 | 1.9 |
| 2020 | 5 | 16 | 12 | 16.5 | 485 | 148 | 627 | 994 | 20.8 | 305 | 2.1 |
| 2020 | 5 | 16 | 13 | 16.7 | 482 | 216 | 688 | 994 | 21.3 | 300 | 2.3 |
| 2020 | 5 | 16 | 14 | 16.5 | 443 | 244 | 663 | 993 | 21.1 | 298 | 2.2 |
| 2020 | 5 | 16 | 15 | 16.4 | 375 | 262 | 585 | 993 | 20.6 | 297 | 2   |
| 2020 | 5 | 16 | 16 | 16.2 | 298 | 205 | 433 | 994 | 20   | 283 | 1.9 |
| 2020 | 5 | 16 | 17 | 16.2 | 204 | 147 | 276 | 994 | 19.7 | 272 | 2.1 |
| 2020 | 5 | 16 | 18 | 16.2 | 106 | 375 | 214 | 994 | 18.7 | 273 | 1.6 |
| 2020 | 5 | 16 | 19 | 15.5 | 35  | 78  | 42  | 994 | 16   | 280 | 0.9 |
| 2020 | 5 | 16 | 20 | 14.5 | 0   | 0   | 0   | 994 | 14.5 | 294 | 0.9 |
| 2020 | 5 | 16 | 21 | 13.6 | 0   | 0   | 0   | 994 | 13.6 | 299 | 0.9 |
| 2020 | 5 | 16 | 22 | 13.1 | 0   | 0   | 0   | 994 | 13.1 | 302 | 0.9 |
| 2020 | 5 | 16 | 23 | 12.9 | 0   | 0   | 0   | 994 | 12.9 | 317 | 0.8 |
| 2020 | 5 | 17 | 0  | 12.7 | 0   | 0   | 0   | 993 | 12.7 | 347 | 0.7 |
| 2020 | 5 | 17 | 1  | 12.7 | 0   | 0   | 0   | 993 | 12.7 | 353 | 0.7 |
| 2020 | 5 | 17 | 2  | 13   | 0   | 0   | 0   | 993 | 13   | 3   | 0.6 |
| 2020 | 5 | 17 | 3  | 13.1 | 0   | 0   | 0   | 993 | 13.1 | 42  | 0.3 |
| 2020 | 5 | 17 | 4  | 13.1 | 0   | 0   | 0   | 993 | 13.1 | 175 | 0.3 |
| 2020 | 5 | 17 | 5  | 12.6 | 0   | 0   | 0   | 994 | 12.6 | 188 | 0.6 |
| 2020 | 5 | 17 | 6  | 13.5 | 10  | 0   | 10  | 994 | 13.6 | 188 | 0.6 |
| 2020 | 5 | 17 | 7  | 14.3 | 102 | 12  | 106 | 994 | 15.9 | 206 | 0.8 |
| 2020 | 5 | 17 | 8  | 15.1 | 105 | 0   | 105 | 994 | 17.9 | 250 | 0.5 |
| 2020 | 5 | 17 | 9  | 15.8 | 255 | 30  | 275 | 994 | 19.8 | 294 | 0.2 |
| 2020 | 5 | 17 | 10 | 16.2 | 341 | 384 | 651 | 994 | 21.8 | 354 | 0.1 |
| 2020 | 5 | 17 | 11 | 16.4 | 256 | 696 | 886 | 993 | 23.7 | 226 | 0.2 |
| 2020 | 5 | 17 | 12 | 16.5 | 410 | 457 | 847 | 993 | 25.4 | 202 | 0.8 |
| 2020 | 5 | 17 | 13 | 16.8 | 251 | 731 | 950 | 992 | 26.1 | 187 | 1.7 |
| 2020 | 5 | 17 | 14 | 17.1 | 241 | 714 | 886 | 992 | 26.2 | 175 | 2.4 |
| 2020 | 5 | 17 | 15 | 17.3 | 372 | 279 | 596 | 991 | 25.7 | 166 | 3.1 |
| 2020 | 5 | 17 | 16 | 17.3 | 199 | 559 | 567 | 991 | 24.7 | 161 | 3.5 |
| 2020 | 5 | 17 | 17 | 17.3 | 180 | 348 | 349 | 992 | 23   | 161 | 3.4 |
| 2020 | 5 | 17 | 18 | 17.3 | 102 | 258 | 177 | 992 | 20.6 | 160 | 2.7 |
| 2020 | 5 | 17 | 19 | 16.6 | 33  | 57  | 38  | 993 | 17.7 | 161 | 1.6 |
| 2020 | 5 | 17 | 20 | 15.9 | 0   | 0   | 0   | 993 | 16.2 | 156 | 1.3 |
| 2020 | 5 | 17 | 21 | 15.4 | 0   | 0   | 0   | 993 | 15.6 | 146 | 1.2 |
| 2020 | 5 | 17 | 22 | 15   | 0   | 0   | 0   | 993 | 15   | 137 | 1.1 |
| 2020 | 5 | 17 | 23 | 14.6 | 0   | 0   | 0   | 993 | 14.6 | 132 | 1.2 |
| 2020 | 5 | 18 | 0  | 14.3 | 0   | 0   | 0   | 992 | 14.3 | 133 | 1.4 |
| 2020 | 5 | 18 | 1  | 14.5 | 0   | 0   | 0   | 991 | 14.5 | 138 | 2.2 |
| 2020 | 5 | 18 | 2  | 14.8 | 0   | 0   | 0   | 989 | 14.9 | 141 | 3.1 |
| 2020 | 5 | 18 | 3  | 14.8 | 0   | 0   | 0   | 988 | 15   | 141 | 3.4 |
| 2020 | 5 | 18 | 4  | 14.5 | 0   | 0   | 0   | 989 | 14.5 | 140 | 2   |
| 2020 | 5 | 18 | 5  | 15   | 0   | 0   | 0   | 989 | 15   | 135 | 2.6 |
| 2020 | 5 | 18 | 6  | 16   | 23  | 0   | 23  | 989 | 16.5 | 138 | 3.7 |
| 2020 | 5 | 18 | 7  | 17.2 | 65  | 0   | 65  | 989 | 18.1 | 142 | 4.4 |
| 2020 | 5 | 18 | 8  | 18   | 209 | 165 | 290 | 989 | 19.9 | 147 | 4.6 |
| 2020 | 5 | 18 | 9  | 18.6 | 305 | 185 | 427 | 989 | 21.8 | 153 | 4.4 |

|      |   |    |    |      |     |     |     |     |      |     |     |
|------|---|----|----|------|-----|-----|-----|-----|------|-----|-----|
| 2020 | 5 | 18 | 10 | 19.1 | 364 | 323 | 624 | 988 | 23.1 | 156 | 4.2 |
| 2020 | 5 | 18 | 11 | 19.4 | 437 | 87  | 516 | 988 | 23.8 | 155 | 4.3 |
| 2020 | 5 | 18 | 12 | 19.4 | 470 | 281 | 739 | 986 | 23.9 | 150 | 4.7 |
| 2020 | 5 | 18 | 13 | 19.2 | 415 | 406 | 803 | 985 | 23.7 | 143 | 5.6 |
| 2020 | 5 | 18 | 14 | 19   | 452 | 199 | 632 | 984 | 23.2 | 143 | 6.3 |
| 2020 | 5 | 18 | 15 | 18.6 | 381 | 246 | 579 | 984 | 22.8 | 148 | 6.6 |
| 2020 | 5 | 18 | 16 | 17.9 | 87  | 0   | 87  | 984 | 21.6 | 156 | 6.5 |
| 2020 | 5 | 18 | 17 | 17.5 | 154 | 4   | 156 | 984 | 20   | 177 | 4.9 |
| 2020 | 5 | 18 | 18 | 16.8 | 110 | 173 | 160 | 985 | 18.1 | 253 | 3.4 |
| 2020 | 5 | 18 | 19 | 14.2 | 25  | 16  | 26  | 986 | 15.3 | 300 | 4.3 |
| 2020 | 5 | 18 | 20 | 12.3 | 0   | 0   | 0   | 987 | 13.6 | 313 | 3.9 |
| 2020 | 5 | 18 | 21 | 12.1 | 0   | 0   | 0   | 988 | 13.3 | 307 | 2.7 |
| 2020 | 5 | 18 | 22 | 11.8 | 0   | 0   | 0   | 988 | 12.4 | 285 | 1.9 |
| 2020 | 5 | 18 | 23 | 11.5 | 0   | 0   | 0   | 988 | 11.5 | 268 | 2   |
| 2020 | 5 | 19 | 0  | 11.5 | 0   | 0   | 0   | 988 | 11.6 | 263 | 2.9 |
| 2020 | 5 | 19 | 1  | 11   | 0   | 0   | 0   | 987 | 11.3 | 262 | 3.1 |
| 2020 | 5 | 19 | 2  | 10.4 | 0   | 0   | 0   | 987 | 10.7 | 260 | 3.2 |
| 2020 | 5 | 19 | 3  | 10   | 0   | 0   | 0   | 987 | 10.4 | 256 | 3.3 |
| 2020 | 5 | 19 | 4  | 9.9  | 0   | 0   | 0   | 987 | 10.3 | 250 | 3.3 |
| 2020 | 5 | 19 | 5  | 10.1 | 0   | 0   | 0   | 987 | 10.9 | 248 | 4   |
| 2020 | 5 | 19 | 6  | 10.5 | 18  | 0   | 18  | 987 | 11.8 | 251 | 4.7 |
| 2020 | 5 | 19 | 7  | 11   | 68  | 0   | 68  | 987 | 12.8 | 256 | 5.1 |
| 2020 | 5 | 19 | 8  | 11.7 | 128 | 0   | 128 | 987 | 13.9 | 254 | 5.6 |
| 2020 | 5 | 19 | 9  | 12.1 | 103 | 0   | 103 | 987 | 15.2 | 246 | 6.6 |
| 2020 | 5 | 19 | 10 | 11.9 | 131 | 0   | 131 | 986 | 16.3 | 251 | 7.5 |
| 2020 | 5 | 19 | 11 | 11.4 | 133 | 0   | 133 | 986 | 16.8 | 263 | 7.5 |
| 2020 | 5 | 19 | 12 | 11   | 184 | 9   | 192 | 986 | 17.2 | 271 | 7.6 |
| 2020 | 5 | 19 | 13 | 10.7 | 358 | 24  | 380 | 987 | 17   | 276 | 7.8 |
| 2020 | 5 | 19 | 14 | 10.5 | 94  | 0   | 94  | 987 | 16.2 | 282 | 7.7 |
| 2020 | 5 | 19 | 15 | 10.6 | 124 | 0   | 124 | 987 | 15.4 | 288 | 7.1 |
| 2020 | 5 | 19 | 16 | 10.8 | 170 | 3   | 172 | 988 | 15   | 294 | 6.5 |
| 2020 | 5 | 19 | 17 | 10.9 | 140 | 0   | 140 | 989 | 14.4 | 299 | 5.6 |
| 2020 | 5 | 19 | 18 | 10.9 | 38  | 0   | 38  | 990 | 13.5 | 300 | 4.6 |
| 2020 | 5 | 19 | 19 | 11.1 | 37  | 101 | 47  | 991 | 12.6 | 298 | 3.3 |
| 2020 | 5 | 19 | 20 | 11.1 | 0   | 0   | 0   | 992 | 11.6 | 296 | 2.1 |
| 2020 | 5 | 19 | 21 | 10.5 | 0   | 0   | 0   | 993 | 10.5 | 297 | 1.5 |
| 2020 | 5 | 19 | 22 | 10   | 0   | 0   | 0   | 994 | 10   | 297 | 1.4 |
| 2020 | 5 | 19 | 23 | 9.7  | 0   | 0   | 0   | 994 | 9.7  | 293 | 1.4 |
| 2020 | 5 | 20 | 0  | 9.5  | 0   | 0   | 0   | 995 | 9.5  | 287 | 1.5 |
| 2020 | 5 | 20 | 1  | 9.4  | 0   | 0   | 0   | 995 | 9.4  | 287 | 1.5 |
| 2020 | 5 | 20 | 2  | 9.2  | 0   | 0   | 0   | 995 | 9.2  | 291 | 1.5 |
| 2020 | 5 | 20 | 3  | 9.1  | 0   | 0   | 0   | 995 | 9.1  | 296 | 1.4 |
| 2020 | 5 | 20 | 4  | 8.9  | 0   | 0   | 0   | 996 | 8.9  | 301 | 1.3 |
| 2020 | 5 | 20 | 5  | 8.8  | 0   | 0   | 0   | 996 | 8.8  | 309 | 1.2 |
| 2020 | 5 | 20 | 6  | 11.5 | 37  | 170 | 54  | 997 | 11.6 | 319 | 1.4 |
| 2020 | 5 | 20 | 7  | 11.2 | 86  | 502 | 236 | 998 | 13.7 | 335 | 1.9 |
| 2020 | 5 | 20 | 8  | 10.2 | 112 | 677 | 447 | 998 | 15.7 | 332 | 2.3 |
| 2020 | 5 | 20 | 9  | 10   | 131 | 772 | 647 | 999 | 17.4 | 333 | 2.7 |
| 2020 | 5 | 20 | 10 | 10.3 | 146 | 824 | 812 | 999 | 18.8 | 335 | 2.8 |
| 2020 | 5 | 20 | 11 | 10.9 | 159 | 846 | 928 | 999 | 19.8 | 334 | 2.9 |

|      |   |    |    |      |     |     |     |      |      |     |     |
|------|---|----|----|------|-----|-----|-----|------|------|-----|-----|
| 2020 | 5 | 20 | 12 | 11.5 | 152 | 879 | 995 | 999  | 20.7 | 328 | 2.9 |
| 2020 | 5 | 20 | 13 | 11.9 | 169 | 856 | 989 | 998  | 21.1 | 322 | 3   |
| 2020 | 5 | 20 | 14 | 12   | 451 | 196 | 629 | 998  | 21.1 | 320 | 3   |
| 2020 | 5 | 20 | 15 | 12   | 388 | 190 | 541 | 998  | 20.9 | 319 | 3   |
| 2020 | 5 | 20 | 16 | 11.9 | 300 | 215 | 443 | 998  | 20.3 | 318 | 2.8 |
| 2020 | 5 | 20 | 17 | 11.8 | 129 | 629 | 437 | 998  | 19.4 | 321 | 2.7 |
| 2020 | 5 | 20 | 18 | 12.3 | 94  | 465 | 231 | 999  | 17.8 | 322 | 2.2 |
| 2020 | 5 | 20 | 19 | 12   | 37  | 158 | 52  | 999  | 14.5 | 323 | 1.5 |
| 2020 | 5 | 20 | 20 | 10.9 | 0   | 0   | 0   | 1000 | 12.8 | 330 | 1.6 |
| 2020 | 5 | 20 | 21 | 10.2 | 0   | 0   | 0   | 1001 | 11.8 | 344 | 1.5 |
| 2020 | 5 | 20 | 22 | 9.7  | 0   | 0   | 0   | 1001 | 11   | 358 | 1.3 |
| 2020 | 5 | 20 | 23 | 9.3  | 0   | 0   | 0   | 1001 | 10.4 | 10  | 1.1 |
| 2020 | 5 | 21 | 0  | 9.2  | 0   | 0   | 0   | 1001 | 10   | 26  | 1   |
| 2020 | 5 | 21 | 1  | 9.4  | 0   | 0   | 0   | 1000 | 10   | 49  | 1   |
| 2020 | 5 | 21 | 2  | 9.8  | 0   | 0   | 0   | 1000 | 9.8  | 77  | 1   |
| 2020 | 5 | 21 | 3  | 9.5  | 0   | 0   | 0   | 1000 | 9.5  | 102 | 1.1 |
| 2020 | 5 | 21 | 4  | 9.4  | 0   | 0   | 0   | 1001 | 9.4  | 121 | 1.2 |
| 2020 | 5 | 21 | 5  | 9.6  | 0   | 0   | 0   | 1002 | 9.6  | 130 | 1.3 |
| 2020 | 5 | 21 | 6  | 12.5 | 39  | 96  | 49  | 1002 | 12.6 | 129 | 2.2 |
| 2020 | 5 | 21 | 7  | 13   | 114 | 162 | 163 | 1003 | 15   | 129 | 3.2 |
| 2020 | 5 | 21 | 8  | 13.3 | 170 | 511 | 423 | 1003 | 17   | 133 | 3   |
| 2020 | 5 | 21 | 9  | 13.6 | 202 | 622 | 618 | 1002 | 18.8 | 134 | 2.6 |
| 2020 | 5 | 21 | 10 | 14   | 221 | 690 | 780 | 1002 | 20.2 | 133 | 2.5 |
| 2020 | 5 | 21 | 11 | 14.4 | 240 | 722 | 897 | 1002 | 21.3 | 131 | 2.5 |
| 2020 | 5 | 21 | 12 | 14.6 | 231 | 759 | 960 | 1001 | 22.2 | 129 | 2.1 |
| 2020 | 5 | 21 | 13 | 14.8 | 245 | 737 | 953 | 1001 | 22.9 | 134 | 1.5 |
| 2020 | 5 | 21 | 14 | 14.8 | 251 | 699 | 886 | 1001 | 23.3 | 151 | 1.3 |
| 2020 | 5 | 21 | 15 | 14.8 | 226 | 672 | 768 | 1001 | 23.3 | 166 | 1.5 |
| 2020 | 5 | 21 | 16 | 14.7 | 218 | 578 | 602 | 1001 | 22.7 | 166 | 2   |
| 2020 | 5 | 21 | 17 | 14.8 | 186 | 450 | 408 | 1000 | 21.6 | 165 | 2.7 |
| 2020 | 5 | 21 | 18 | 15.2 | 130 | 268 | 210 | 1001 | 19.5 | 165 | 2.6 |
| 2020 | 5 | 21 | 19 | 14.6 | 36  | 51  | 41  | 1001 | 16.5 | 163 | 2.2 |
| 2020 | 5 | 21 | 20 | 13.7 | 0   | 0   | 0   | 1002 | 14.8 | 158 | 2.3 |
| 2020 | 5 | 21 | 21 | 13.1 | 0   | 0   | 0   | 1003 | 13.6 | 145 | 2   |
| 2020 | 5 | 21 | 22 | 12.5 | 0   | 0   | 0   | 1003 | 12.9 | 129 | 2   |
| 2020 | 5 | 21 | 23 | 12   | 0   | 0   | 0   | 1003 | 12.4 | 120 | 2.3 |
| 2020 | 5 | 22 | 0  | 11.6 | 0   | 0   | 0   | 1003 | 12.2 | 117 | 2.7 |
| 2020 | 5 | 22 | 1  | 11.4 | 0   | 0   | 0   | 1002 | 12   | 117 | 2.8 |
| 2020 | 5 | 22 | 2  | 11.3 | 0   | 0   | 0   | 1002 | 11.7 | 117 | 2.7 |
| 2020 | 5 | 22 | 3  | 11.2 | 0   | 0   | 0   | 1001 | 11.5 | 115 | 2.6 |
| 2020 | 5 | 22 | 4  | 11.1 | 0   | 0   | 0   | 1001 | 11.4 | 111 | 2.7 |
| 2020 | 5 | 22 | 5  | 11   | 0   | 0   | 0   | 1002 | 11.5 | 109 | 2.8 |
| 2020 | 5 | 22 | 6  | 11.2 | 35  | 58  | 41  | 1002 | 12.3 | 109 | 3.3 |
| 2020 | 5 | 22 | 7  | 11.4 | 132 | 290 | 220 | 1002 | 14.1 | 110 | 4.1 |
| 2020 | 5 | 22 | 8  | 11.4 | 163 | 448 | 386 | 1002 | 16   | 112 | 4.6 |
| 2020 | 5 | 22 | 9  | 11.4 | 259 | 409 | 532 | 1002 | 17.2 | 117 | 4.5 |
| 2020 | 5 | 22 | 10 | 11.8 | 260 | 631 | 772 | 1001 | 18.1 | 124 | 4.6 |
| 2020 | 5 | 22 | 11 | 12   | 366 | 480 | 802 | 1001 | 18.7 | 129 | 4.7 |
| 2020 | 5 | 22 | 12 | 12.2 | 254 | 733 | 959 | 1001 | 19.3 | 131 | 4.5 |
| 2020 | 5 | 22 | 13 | 12.8 | 255 | 731 | 957 | 1000 | 20.9 | 131 | 4.4 |

|      |   |    |    |      |     |     |     |      |      |     |     |
|------|---|----|----|------|-----|-----|-----|------|------|-----|-----|
| 2020 | 5 | 22 | 14 | 12.9 | 257 | 698 | 892 | 1000 | 21.7 | 131 | 3.9 |
| 2020 | 5 | 22 | 15 | 13   | 237 | 666 | 776 | 999  | 21.9 | 131 | 3.3 |
| 2020 | 5 | 22 | 16 | 12.9 | 210 | 606 | 614 | 999  | 21.6 | 129 | 3   |
| 2020 | 5 | 22 | 17 | 13   | 169 | 519 | 425 | 998  | 20.8 | 129 | 3   |
| 2020 | 5 | 22 | 18 | 14   | 117 | 357 | 225 | 998  | 18.9 | 132 | 2.3 |
| 2020 | 5 | 22 | 19 | 13.3 | 41  | 82  | 50  | 998  | 15.7 | 136 | 1.8 |
| 2020 | 5 | 22 | 20 | 12.5 | 0   | 0   | 0   | 999  | 14.3 | 136 | 2.1 |
| 2020 | 5 | 22 | 21 | 12.2 | 0   | 0   | 0   | 999  | 13.5 | 135 | 2.3 |
| 2020 | 5 | 22 | 22 | 12   | 0   | 0   | 0   | 1000 | 12.8 | 134 | 2.2 |
| 2020 | 5 | 22 | 23 | 12   | 0   | 0   | 0   | 1000 | 12.1 | 131 | 2.1 |
| 2020 | 5 | 23 | 0  | 11.4 | 0   | 0   | 0   | 1000 | 11.4 | 125 | 1.9 |
| 2020 | 5 | 23 | 1  | 10.8 | 0   | 0   | 0   | 1000 | 10.8 | 121 | 1.8 |
| 2020 | 5 | 23 | 2  | 10.3 | 0   | 0   | 0   | 1000 | 10.3 | 117 | 1.7 |
| 2020 | 5 | 23 | 3  | 9.9  | 0   | 0   | 0   | 999  | 9.9  | 112 | 1.6 |
| 2020 | 5 | 23 | 4  | 9.6  | 0   | 0   | 0   | 999  | 9.6  | 110 | 1.5 |
| 2020 | 5 | 23 | 5  | 9.6  | 0   | 0   | 0   | 1000 | 9.6  | 111 | 1.6 |
| 2020 | 5 | 23 | 6  | 11.2 | 43  | 114 | 56  | 1000 | 12.3 | 111 | 2.6 |
| 2020 | 5 | 23 | 7  | 12.1 | 109 | 405 | 233 | 1000 | 14.7 | 114 | 3   |
| 2020 | 5 | 23 | 8  | 13.2 | 151 | 571 | 435 | 1000 | 17.3 | 122 | 2.7 |
| 2020 | 5 | 23 | 9  | 13.9 | 185 | 660 | 628 | 1000 | 19.8 | 136 | 2   |
| 2020 | 5 | 23 | 10 | 14.2 | 212 | 708 | 786 | 1000 | 21.6 | 149 | 1.8 |
| 2020 | 5 | 23 | 11 | 14.6 | 228 | 738 | 900 | 999  | 22.8 | 158 | 1.8 |
| 2020 | 5 | 23 | 12 | 15   | 483 | 223 | 698 | 999  | 23.7 | 166 | 1.9 |
| 2020 | 5 | 23 | 13 | 15.2 | 482 | 228 | 701 | 998  | 24.2 | 175 | 2   |
| 2020 | 5 | 23 | 14 | 15.2 | 229 | 731 | 894 | 998  | 24.4 | 181 | 2.2 |
| 2020 | 5 | 23 | 15 | 15.2 | 314 | 442 | 672 | 998  | 24.3 | 185 | 2.3 |
| 2020 | 5 | 23 | 16 | 15.1 | 209 | 595 | 607 | 998  | 23.6 | 189 | 2.2 |
| 2020 | 5 | 23 | 17 | 15.3 | 172 | 495 | 417 | 998  | 22.8 | 194 | 2   |
| 2020 | 5 | 23 | 18 | 16.4 | 118 | 335 | 219 | 998  | 21.1 | 195 | 1.4 |
| 2020 | 5 | 23 | 19 | 15.8 | 40  | 88  | 49  | 998  | 17.9 | 193 | 1   |
| 2020 | 5 | 23 | 20 | 14.5 | 0   | 0   | 0   | 997  | 16.3 | 177 | 1.3 |
| 2020 | 5 | 23 | 21 | 13.6 | 0   | 0   | 0   | 997  | 15.2 | 165 | 1.4 |
| 2020 | 5 | 23 | 22 | 13   | 0   | 0   | 0   | 998  | 14.3 | 166 | 1.5 |
| 2020 | 5 | 23 | 23 | 12.6 | 0   | 0   | 0   | 999  | 13.4 | 172 | 1.2 |
| 2020 | 5 | 24 | 0  | 12.8 | 0   | 0   | 0   | 999  | 13.5 | 169 | 1.1 |
| 2020 | 5 | 24 | 1  | 12.9 | 0   | 0   | 0   | 999  | 13.4 | 171 | 1.1 |
| 2020 | 5 | 24 | 2  | 12.8 | 0   | 0   | 0   | 998  | 13.2 | 169 | 1.1 |
| 2020 | 5 | 24 | 3  | 13   | 0   | 0   | 0   | 998  | 13.3 | 163 | 1.3 |
| 2020 | 5 | 24 | 4  | 12.7 | 0   | 0   | 0   | 998  | 12.7 | 165 | 1.3 |
| 2020 | 5 | 24 | 5  | 12.4 | 0   | 0   | 0   | 998  | 12.4 | 170 | 1.3 |
| 2020 | 5 | 24 | 6  | 14.4 | 29  | 0   | 29  | 998  | 15   | 177 | 1.7 |
| 2020 | 5 | 24 | 7  | 15.7 | 95  | 0   | 95  | 998  | 17.3 | 174 | 2   |
| 2020 | 5 | 24 | 8  | 16.4 | 202 | 59  | 231 | 998  | 20.4 | 203 | 2.6 |
| 2020 | 5 | 24 | 9  | 16.8 | 295 | 270 | 476 | 998  | 22.3 | 225 | 3.7 |
| 2020 | 5 | 24 | 10 | 17.6 | 384 | 100 | 464 | 998  | 22.5 | 234 | 4.1 |
| 2020 | 5 | 24 | 11 | 18.2 | 423 | 67  | 484 | 998  | 22.6 | 244 | 4.7 |
| 2020 | 5 | 24 | 12 | 18.5 | 210 | 11  | 220 | 998  | 22.2 | 253 | 5   |
| 2020 | 5 | 24 | 13 | 18.5 | 195 | 9   | 204 | 998  | 21.5 | 263 | 4.9 |
| 2020 | 5 | 24 | 14 | 18.5 | 322 | 21  | 341 | 998  | 21   | 277 | 4.5 |
| 2020 | 5 | 24 | 15 | 18.3 | 99  | 0   | 99  | 998  | 21   | 291 | 3.8 |

|      |   |    |    |      |     |     |     |      |      |     |     |
|------|---|----|----|------|-----|-----|-----|------|------|-----|-----|
| 2020 | 5 | 24 | 16 | 18   | 85  | 0   | 85  | 997  | 21   | 303 | 3   |
| 2020 | 5 | 24 | 17 | 17.5 | 90  | 0   | 90  | 997  | 20.7 | 310 | 2.5 |
| 2020 | 5 | 24 | 18 | 17.2 | 68  | 0   | 68  | 997  | 19.5 | 313 | 1.6 |
| 2020 | 5 | 24 | 19 | 16.2 | 20  | 0   | 20  | 998  | 17   | 313 | 1   |
| 2020 | 5 | 24 | 20 | 14.7 | 0   | 0   | 0   | 999  | 15   | 321 | 1.1 |
| 2020 | 5 | 24 | 21 | 13.7 | 0   | 0   | 0   | 1000 | 13.7 | 334 | 1.1 |
| 2020 | 5 | 24 | 22 | 12.7 | 0   | 0   | 0   | 1000 | 12.7 | 349 | 1.1 |
| 2020 | 5 | 24 | 23 | 12.4 | 0   | 0   | 0   | 1000 | 12.4 | 1   | 1   |
| 2020 | 5 | 25 | 0  | 12   | 0   | 0   | 0   | 1000 | 12   | 0   | 0.9 |
| 2020 | 5 | 25 | 1  | 11.7 | 0   | 0   | 0   | 1000 | 11.7 | 1   | 1   |
| 2020 | 5 | 25 | 2  | 11.6 | 0   | 0   | 0   | 999  | 11.6 | 1   | 0.9 |
| 2020 | 5 | 25 | 3  | 10.8 | 0   | 0   | 0   | 999  | 10.8 | 1   | 1   |
| 2020 | 5 | 25 | 4  | 10.4 | 0   | 0   | 0   | 1000 | 10.4 | 4   | 1   |
| 2020 | 5 | 25 | 5  | 11   | 0   | 0   | 0   | 1000 | 11   | 1   | 1.1 |
| 2020 | 5 | 25 | 6  | 11.5 | 34  | 0   | 34  | 1000 | 12.6 | 4   | 1.5 |
| 2020 | 5 | 25 | 7  | 11.8 | 110 | 24  | 117 | 1000 | 13.4 | 6   | 1.7 |
| 2020 | 5 | 25 | 8  | 12   | 197 | 47  | 220 | 1001 | 14.5 | 349 | 1.7 |
| 2020 | 5 | 25 | 9  | 11.9 | 306 | 120 | 387 | 1000 | 15.5 | 344 | 1.9 |
| 2020 | 5 | 25 | 10 | 12.1 | 393 | 174 | 534 | 1000 | 16.5 | 344 | 2.2 |
| 2020 | 5 | 25 | 11 | 12.9 | 449 | 231 | 660 | 1000 | 18.9 | 338 | 2.6 |
| 2020 | 5 | 25 | 12 | 13.5 | 488 | 150 | 632 | 1000 | 20.4 | 333 | 2.4 |
| 2020 | 5 | 25 | 13 | 13.7 | 460 | 315 | 763 | 999  | 21.3 | 326 | 2.2 |
| 2020 | 5 | 25 | 14 | 13.7 | 440 | 92  | 524 | 999  | 21.8 | 317 | 2.1 |
| 2020 | 5 | 25 | 15 | 13.7 | 354 | 54  | 398 | 999  | 21.8 | 309 | 2.2 |
| 2020 | 5 | 25 | 16 | 13.7 | 251 | 430 | 540 | 999  | 21.3 | 305 | 2.4 |
| 2020 | 5 | 25 | 17 | 13.8 | 161 | 459 | 390 | 998  | 20.3 | 307 | 2.4 |
| 2020 | 5 | 25 | 18 | 14.8 | 112 | 224 | 180 | 998  | 18.4 | 312 | 1.5 |
| 2020 | 5 | 25 | 19 | 14.5 | 36  | 59  | 42  | 999  | 16.1 | 320 | 1.3 |
| 2020 | 5 | 25 | 20 | 13.6 | 0   | 0   | 0   | 999  | 14.5 | 331 | 1.5 |
| 2020 | 5 | 25 | 21 | 13.3 | 0   | 0   | 0   | 1000 | 13.9 | 338 | 1.5 |
| 2020 | 5 | 25 | 22 | 13   | 0   | 0   | 0   | 1000 | 13   | 347 | 1.3 |
| 2020 | 5 | 25 | 23 | 12.6 | 0   | 0   | 0   | 999  | 12.6 | 356 | 1.3 |
| 2020 | 5 | 26 | 0  | 12.3 | 0   | 0   | 0   | 999  | 12.3 | 358 | 1.2 |
| 2020 | 5 | 26 | 1  | 12.2 | 0   | 0   | 0   | 998  | 12.2 | 358 | 1.1 |
| 2020 | 5 | 26 | 2  | 12.2 | 0   | 0   | 0   | 998  | 12.2 | 5   | 1   |
| 2020 | 5 | 26 | 3  | 12.1 | 0   | 0   | 0   | 997  | 12.1 | 15  | 0.9 |
| 2020 | 5 | 26 | 4  | 12   | 0   | 0   | 0   | 997  | 12   | 17  | 0.8 |
| 2020 | 5 | 26 | 5  | 11.9 | 0   | 0   | 0   | 997  | 11.9 | 6   | 0.9 |
| 2020 | 5 | 26 | 6  | 12.7 | 13  | 0   | 13  | 998  | 13.3 | 354 | 1.5 |
| 2020 | 5 | 26 | 7  | 13.1 | 82  | 0   | 82  | 998  | 14.4 | 350 | 2.1 |
| 2020 | 5 | 26 | 8  | 13.6 | 154 | 3   | 155 | 999  | 15.7 | 342 | 2   |
| 2020 | 5 | 26 | 9  | 13.8 | 107 | 0   | 107 | 999  | 17.6 | 333 | 1.8 |
| 2020 | 5 | 26 | 10 | 14   | 202 | 8   | 208 | 998  | 18.8 | 310 | 1.5 |
| 2020 | 5 | 26 | 11 | 14.1 | 446 | 105 | 542 | 998  | 19.5 | 274 | 1.3 |
| 2020 | 5 | 26 | 12 | 14.4 | 204 | 797 | 973 | 997  | 21.1 | 261 | 2   |
| 2020 | 5 | 26 | 13 | 14.3 | 412 | 436 | 833 | 997  | 22.3 | 257 | 2.6 |
| 2020 | 5 | 26 | 14 | 14.1 | 202 | 784 | 917 | 996  | 22.5 | 261 | 3.1 |
| 2020 | 5 | 26 | 15 | 13.7 | 190 | 749 | 799 | 996  | 22.1 | 264 | 3.4 |
| 2020 | 5 | 26 | 16 | 13.5 | 173 | 684 | 633 | 996  | 21.3 | 267 | 3.6 |
| 2020 | 5 | 26 | 17 | 13.3 | 161 | 463 | 392 | 996  | 20.1 | 272 | 3.5 |

|      |   |    |    |      |     |     |      |     |      |     |     |
|------|---|----|----|------|-----|-----|------|-----|------|-----|-----|
| 2020 | 5 | 26 | 18 | 13.7 | 112 | 227 | 182  | 996 | 18.4 | 272 | 2.6 |
| 2020 | 5 | 26 | 19 | 13.9 | 41  | 58  | 47   | 997 | 15.6 | 268 | 1.5 |
| 2020 | 5 | 26 | 20 | 13.5 | 0   | 0   | 0    | 997 | 14.3 | 267 | 1.3 |
| 2020 | 5 | 26 | 21 | 14   | 0   | 0   | 0    | 998 | 14   | 266 | 1.4 |
| 2020 | 5 | 26 | 22 | 14   | 0   | 0   | 0    | 997 | 14   | 265 | 1.3 |
| 2020 | 5 | 26 | 23 | 14.2 | 0   | 0   | 0    | 997 | 14.2 | 268 | 1.3 |
| 2020 | 5 | 27 | 0  | 14.5 | 0   | 0   | 0    | 997 | 14.5 | 278 | 1.6 |
| 2020 | 5 | 27 | 1  | 14.7 | 0   | 0   | 0    | 997 | 14.7 | 294 | 1.7 |
| 2020 | 5 | 27 | 2  | 14.8 | 0   | 0   | 0    | 997 | 14.8 | 315 | 2.1 |
| 2020 | 5 | 27 | 3  | 14.6 | 0   | 0   | 0    | 997 | 14.7 | 332 | 2.4 |
| 2020 | 5 | 27 | 4  | 13.7 | 0   | 0   | 0    | 997 | 13.7 | 342 | 2.2 |
| 2020 | 5 | 27 | 5  | 12.7 | 0   | 0   | 0    | 997 | 12.7 | 346 | 1.8 |
| 2020 | 5 | 27 | 6  | 13.1 | 47  | 125 | 61   | 998 | 13.7 | 349 | 2.6 |
| 2020 | 5 | 27 | 7  | 12.6 | 119 | 136 | 161  | 998 | 15.2 | 1   | 3.2 |
| 2020 | 5 | 27 | 8  | 12.3 | 169 | 434 | 386  | 998 | 17.2 | 6   | 3.7 |
| 2020 | 5 | 27 | 9  | 12.4 | 188 | 604 | 595  | 998 | 19.1 | 4   | 3.9 |
| 2020 | 5 | 27 | 10 | 12.3 | 298 | 495 | 701  | 998 | 20.7 | 358 | 3.8 |
| 2020 | 5 | 27 | 11 | 12.4 | 165 | 851 | 942  | 997 | 21.9 | 352 | 3.6 |
| 2020 | 5 | 27 | 12 | 12.6 | 173 | 860 | 1003 | 997 | 22.6 | 345 | 3.4 |
| 2020 | 5 | 27 | 13 | 12.7 | 173 | 856 | 1000 | 997 | 22.9 | 334 | 3.4 |
| 2020 | 5 | 27 | 14 | 12.7 | 171 | 839 | 938  | 997 | 22.7 | 326 | 3.2 |
| 2020 | 5 | 27 | 15 | 12.7 | 294 | 512 | 710  | 996 | 22.2 | 319 | 3.2 |
| 2020 | 5 | 27 | 16 | 12.7 | 149 | 745 | 650  | 997 | 21.3 | 312 | 3.3 |
| 2020 | 5 | 27 | 17 | 12.7 | 177 | 396 | 376  | 997 | 20.1 | 309 | 3.5 |
| 2020 | 5 | 27 | 18 | 12.9 | 96  | 487 | 246  | 997 | 18.2 | 311 | 2.8 |
| 2020 | 5 | 27 | 19 | 13   | 41  | 189 | 63   | 997 | 15.7 | 312 | 1.9 |
| 2020 | 5 | 27 | 20 | 12.3 | 0   | 0   | 0    | 997 | 13.7 | 317 | 1.5 |
| 2020 | 5 | 27 | 21 | 11.8 | 0   | 0   | 0    | 998 | 12.7 | 323 | 1.2 |
| 2020 | 5 | 27 | 22 | 11.5 | 0   | 0   | 0    | 998 | 12   | 329 | 1.1 |
| 2020 | 5 | 27 | 23 | 11.3 | 0   | 0   | 0    | 997 | 11.8 | 336 | 1   |
| 2020 | 5 | 28 | 0  | 11.2 | 0   | 0   | 0    | 997 | 11.9 | 341 | 0.9 |
| 2020 | 5 | 28 | 1  | 11   | 0   | 0   | 0    | 997 | 12.3 | 354 | 0.7 |
| 2020 | 5 | 28 | 2  | 10.9 | 0   | 0   | 0    | 996 | 12.4 | 10  | 0.4 |
| 2020 | 5 | 28 | 3  | 10.8 | 0   | 0   | 0    | 996 | 12.2 | 328 | 0.2 |
| 2020 | 5 | 28 | 4  | 10.8 | 0   | 0   | 0    | 997 | 11.9 | 260 | 0.6 |
| 2020 | 5 | 28 | 5  | 10.8 | 0   | 0   | 0    | 997 | 11.5 | 243 | 0.8 |
| 2020 | 5 | 28 | 6  | 11.9 | 39  | 35  | 43   | 997 | 13   | 221 | 0.8 |
| 2020 | 5 | 28 | 7  | 11.9 | 154 | 197 | 216  | 997 | 15.1 | 209 | 1.6 |
| 2020 | 5 | 28 | 8  | 11.5 | 268 | 264 | 401  | 997 | 17.3 | 223 | 1.9 |
| 2020 | 5 | 28 | 9  | 11.1 | 344 | 360 | 587  | 997 | 18.6 | 230 | 2.1 |
| 2020 | 5 | 28 | 10 | 11.5 | 366 | 477 | 755  | 997 | 20.4 | 236 | 2.4 |
| 2020 | 5 | 28 | 11 | 13.3 | 344 | 587 | 880  | 997 | 22.1 | 248 | 2.7 |
| 2020 | 5 | 28 | 12 | 15.2 | 243 | 756 | 973  | 997 | 23.1 | 257 | 3.1 |
| 2020 | 5 | 28 | 13 | 15.8 | 217 | 795 | 984  | 996 | 23.5 | 263 | 3.4 |
| 2020 | 5 | 28 | 14 | 15.5 | 202 | 794 | 928  | 996 | 23.5 | 268 | 3.6 |
| 2020 | 5 | 28 | 15 | 14.9 | 169 | 796 | 818  | 996 | 23   | 274 | 3.8 |
| 2020 | 5 | 28 | 16 | 14.4 | 156 | 736 | 652  | 996 | 22   | 281 | 4   |
| 2020 | 5 | 28 | 17 | 14.3 | 138 | 628 | 453  | 997 | 20.6 | 289 | 4   |
| 2020 | 5 | 28 | 18 | 14.6 | 108 | 444 | 246  | 998 | 18.7 | 297 | 3.5 |
| 2020 | 5 | 28 | 19 | 14.7 | 46  | 149 | 63   | 998 | 16   | 305 | 2.2 |

|      |   |    |    |      |     |     |     |      |      |     |     |
|------|---|----|----|------|-----|-----|-----|------|------|-----|-----|
| 2020 | 5 | 28 | 20 | 14.1 | 0   | 0   | 0   | 999  | 14.1 | 312 | 1.6 |
| 2020 | 5 | 28 | 21 | 13.1 | 0   | 0   | 0   | 999  | 13.1 | 319 | 1.3 |
| 2020 | 5 | 28 | 22 | 12.3 | 0   | 0   | 0   | 1000 | 12.3 | 326 | 1.1 |
| 2020 | 5 | 28 | 23 | 11.8 | 0   | 0   | 0   | 1000 | 11.8 | 330 | 1   |
| 2020 | 5 | 29 | 0  | 11.4 | 0   | 0   | 0   | 1000 | 11.4 | 334 | 1   |
| 2020 | 5 | 29 | 1  | 11.1 | 0   | 0   | 0   | 1000 | 11.1 | 339 | 1.1 |
| 2020 | 5 | 29 | 2  | 10.7 | 0   | 0   | 0   | 1000 | 10.7 | 349 | 1.1 |
| 2020 | 5 | 29 | 3  | 10.3 | 0   | 0   | 0   | 1000 | 10.3 | 358 | 1.1 |
| 2020 | 5 | 29 | 4  | 10   | 0   | 0   | 0   | 1001 | 10   | 5   | 1.1 |
| 2020 | 5 | 29 | 5  | 9.8  | 0   | 0   | 0   | 1001 | 9.8  | 12  | 1.1 |
| 2020 | 5 | 29 | 6  | 12.1 | 43  | 178 | 64  | 1002 | 12.7 | 17  | 1.8 |
| 2020 | 5 | 29 | 7  | 12.7 | 102 | 453 | 244 | 1002 | 15.1 | 16  | 2.1 |
| 2020 | 5 | 29 | 8  | 13   | 142 | 606 | 447 | 1002 | 18.4 | 21  | 2.3 |
| 2020 | 5 | 29 | 9  | 13.3 | 172 | 691 | 638 | 1002 | 20.9 | 21  | 2.3 |
| 2020 | 5 | 29 | 10 | 13.5 | 284 | 539 | 724 | 1002 | 22.7 | 15  | 2.2 |
| 2020 | 5 | 29 | 11 | 13.7 | 344 | 544 | 842 | 1002 | 24   | 4   | 2.1 |
| 2020 | 5 | 29 | 12 | 13.9 | 412 | 435 | 832 | 1002 | 24.8 | 350 | 1.9 |
| 2020 | 5 | 29 | 13 | 14.3 | 411 | 465 | 861 | 1002 | 25.6 | 339 | 1.9 |
| 2020 | 5 | 29 | 14 | 14.5 | 357 | 516 | 830 | 1001 | 25.9 | 334 | 2   |
| 2020 | 5 | 29 | 15 | 14.7 | 277 | 559 | 734 | 1001 | 25.8 | 330 | 2   |
| 2020 | 5 | 29 | 16 | 15   | 240 | 461 | 552 | 1001 | 25.3 | 327 | 1.8 |
| 2020 | 5 | 29 | 17 | 15.6 | 209 | 223 | 321 | 1001 | 24.1 | 323 | 1.2 |
| 2020 | 5 | 29 | 18 | 17.8 | 117 | 375 | 235 | 1001 | 22.2 | 316 | 0.6 |
| 2020 | 5 | 29 | 19 | 16.4 | 45  | 124 | 59  | 1002 | 20   | 294 | 0.5 |
| 2020 | 5 | 29 | 20 | 15.4 | 0   | 0   | 0   | 1003 | 19   | 292 | 0.5 |
| 2020 | 5 | 29 | 21 | 14.6 | 0   | 0   | 0   | 1004 | 19   | 157 | 0.1 |
| 2020 | 5 | 29 | 22 | 14.5 | 0   | 0   | 0   | 1004 | 17.8 | 145 | 0.7 |
| 2020 | 5 | 29 | 23 | 14.5 | 0   | 0   | 0   | 1004 | 16.2 | 145 | 0.9 |
| 2020 | 5 | 30 | 0  | 14.1 | 0   | 0   | 0   | 1005 | 15.5 | 140 | 1   |
| 2020 | 5 | 30 | 1  | 13.5 | 0   | 0   | 0   | 1005 | 14.9 | 133 | 1.1 |
| 2020 | 5 | 30 | 2  | 12.8 | 0   | 0   | 0   | 1005 | 14.5 | 124 | 1.1 |
| 2020 | 5 | 30 | 3  | 12.1 | 0   | 0   | 0   | 1005 | 14.2 | 117 | 1.2 |
| 2020 | 5 | 30 | 4  | 11.5 | 0   | 0   | 0   | 1005 | 14   | 114 | 1.3 |
| 2020 | 5 | 30 | 5  | 11.2 | 0   | 0   | 0   | 1005 | 14   | 113 | 1.3 |
| 2020 | 5 | 30 | 6  | 11.8 | 38  | 36  | 42  | 1006 | 15.2 | 113 | 1.4 |
| 2020 | 5 | 30 | 7  | 11.8 | 96  | 387 | 216 | 1006 | 16.9 | 113 | 1.9 |
| 2020 | 5 | 30 | 8  | 11.4 | 210 | 85  | 253 | 1006 | 17.9 | 108 | 2.4 |
| 2020 | 5 | 30 | 9  | 12   | 308 | 184 | 432 | 1005 | 18.9 | 104 | 2.4 |
| 2020 | 5 | 30 | 10 | 12.3 | 384 | 249 | 587 | 1005 | 20.2 | 111 | 2.5 |
| 2020 | 5 | 30 | 11 | 12.5 | 390 | 395 | 752 | 1005 | 21.2 | 120 | 2.7 |
| 2020 | 5 | 30 | 12 | 12.5 | 469 | 86  | 551 | 1005 | 21.9 | 122 | 2.8 |
| 2020 | 5 | 30 | 13 | 12.7 | 452 | 65  | 515 | 1004 | 22.4 | 121 | 2.8 |
| 2020 | 5 | 30 | 14 | 12.9 | 453 | 127 | 569 | 1004 | 23.5 | 123 | 3   |
| 2020 | 5 | 30 | 15 | 12.9 | 389 | 112 | 481 | 1003 | 23.8 | 125 | 3.1 |
| 2020 | 5 | 30 | 16 | 13.6 | 195 | 587 | 592 | 1003 | 23.2 | 132 | 2.7 |
| 2020 | 5 | 30 | 17 | 15   | 158 | 4   | 160 | 1003 | 21.6 | 143 | 2.1 |
| 2020 | 5 | 30 | 18 | 16.3 | 71  | 0   | 71  | 1003 | 19.5 | 150 | 1.5 |
| 2020 | 5 | 30 | 19 | 15.8 | 28  | 0   | 28  | 1003 | 17.6 | 147 | 1.4 |
| 2020 | 5 | 30 | 20 | 15.8 | 0   | 0   | 0   | 1003 | 16.9 | 142 | 1.6 |
| 2020 | 5 | 30 | 21 | 15.9 | 0   | 0   | 0   | 1003 | 16.5 | 135 | 1.5 |



|      |   |    |    |      |     |     |      |      |      |     |     |
|------|---|----|----|------|-----|-----|------|------|------|-----|-----|
| 2020 | 5 | 30 | 22 | 15.9 | 0   | 0   | 0    | 1003 | 16.2 | 129 | 1.4 |
| 2020 | 5 | 30 | 23 | 15.7 | 0   | 0   | 0    | 1003 | 15.7 | 122 | 1.4 |
| 2020 | 5 | 31 | 0  | 15.2 | 0   | 0   | 0    | 1002 | 15.2 | 121 | 1.2 |
| 2020 | 5 | 31 | 1  | 15   | 0   | 0   | 0    | 1002 | 15   | 121 | 1   |
| 2020 | 5 | 31 | 2  | 15.1 | 0   | 0   | 0    | 1002 | 15.1 | 128 | 0.9 |
| 2020 | 5 | 31 | 3  | 15.3 | 0   | 0   | 0    | 1002 | 15.3 | 133 | 0.8 |
| 2020 | 5 | 31 | 4  | 15.4 | 0   | 0   | 0    | 1002 | 15.4 | 123 | 0.8 |
| 2020 | 5 | 31 | 5  | 15.5 | 0   | 0   | 0    | 1002 | 15.5 | 109 | 0.9 |
| 2020 | 5 | 31 | 6  | 16.3 | 39  | 101 | 51   | 1002 | 16.5 | 103 | 1.1 |
| 2020 | 5 | 31 | 7  | 16.7 | 121 | 125 | 160  | 1001 | 17.4 | 105 | 1.9 |
| 2020 | 5 | 31 | 8  | 16.6 | 212 | 93  | 259  | 1001 | 18.1 | 108 | 2.4 |
| 2020 | 5 | 31 | 9  | 16.3 | 291 | 64  | 334  | 1001 | 19   | 111 | 3   |
| 2020 | 5 | 31 | 10 | 16.4 | 354 | 52  | 396  | 1000 | 20.1 | 116 | 3.3 |
| 2020 | 5 | 31 | 11 | 16.7 | 428 | 71  | 493  | 1000 | 21.4 | 120 | 3.5 |
| 2020 | 5 | 31 | 12 | 17   | 454 | 67  | 518  | 999  | 22.8 | 125 | 3.7 |
| 2020 | 5 | 31 | 13 | 17.1 | 396 | 33  | 429  | 998  | 23.7 | 135 | 3.4 |
| 2020 | 5 | 31 | 14 | 17.1 | 389 | 41  | 427  | 998  | 23.9 | 152 | 2.8 |
| 2020 | 5 | 31 | 15 | 17   | 337 | 39  | 369  | 998  | 23.3 | 163 | 2.6 |
| 2020 | 5 | 31 | 16 | 17   | 226 | 14  | 236  | 998  | 22.8 | 168 | 2.5 |
| 2020 | 5 | 31 | 17 | 16.9 | 185 | 24  | 197  | 998  | 22.1 | 171 | 2   |
| 2020 | 5 | 31 | 18 | 17.3 | 56  | 0   | 56   | 998  | 21   | 172 | 1.3 |
| 2020 | 5 | 31 | 19 | 17.4 | 47  | 125 | 62   | 998  | 19   | 174 | 0.7 |
| 2020 | 5 | 31 | 20 | 16.6 | 0   | 0   | 0    | 998  | 18.1 | 183 | 0.7 |
| 2020 | 5 | 31 | 21 | 16.3 | 0   | 0   | 0    | 999  | 17.6 | 197 | 0.7 |
| 2020 | 5 | 31 | 22 | 16.1 | 0   | 0   | 0    | 999  | 17.3 | 221 | 0.6 |
| 2020 | 5 | 31 | 23 | 16   | 0   | 0   | 0    | 999  | 17.1 | 245 | 0.6 |
| 2020 | 6 | 1  | 0  | 15.7 | 0   | 0   | 0    | 998  | 16.8 | 263 | 0.6 |
| 2020 | 6 | 1  | 1  | 15.6 | 0   | 0   | 0    | 998  | 16.3 | 292 | 0.6 |
| 2020 | 6 | 1  | 2  | 15.6 | 0   | 0   | 0    | 998  | 15.7 | 318 | 0.7 |
| 2020 | 6 | 1  | 3  | 15.3 | 0   | 0   | 0    | 998  | 15.3 | 325 | 0.9 |
| 2020 | 6 | 1  | 4  | 15.4 | 0   | 0   | 0    | 998  | 15.4 | 329 | 1   |
| 2020 | 6 | 1  | 5  | 15.2 | 0   | 0   | 0    | 999  | 15.2 | 338 | 0.9 |
| 2020 | 6 | 1  | 6  | 16.2 | 26  | 0   | 26   | 999  | 16.7 | 330 | 1.3 |
| 2020 | 6 | 1  | 7  | 16.7 | 137 | 280 | 225  | 999  | 18.2 | 323 | 1.9 |
| 2020 | 6 | 1  | 8  | 17.2 | 214 | 114 | 272  | 1000 | 19.8 | 318 | 2.4 |
| 2020 | 6 | 1  | 9  | 17.1 | 175 | 4   | 178  | 999  | 21.1 | 318 | 2.7 |
| 2020 | 6 | 1  | 10 | 16.3 | 387 | 235 | 580  | 999  | 22.2 | 318 | 3   |
| 2020 | 6 | 1  | 11 | 15.4 | 183 | 818 | 932  | 999  | 22.9 | 314 | 3.4 |
| 2020 | 6 | 1  | 12 | 14.7 | 166 | 868 | 1006 | 999  | 23.2 | 312 | 3.9 |
| 2020 | 6 | 1  | 13 | 14   | 176 | 857 | 1006 | 999  | 23.5 | 311 | 4.2 |
| 2020 | 6 | 1  | 14 | 13.3 | 188 | 822 | 942  | 999  | 23.4 | 310 | 4.2 |
| 2020 | 6 | 1  | 15 | 12.5 | 188 | 768 | 817  | 998  | 23   | 308 | 4   |
| 2020 | 6 | 1  | 16 | 11.8 | 186 | 675 | 645  | 998  | 22.1 | 306 | 3.8 |
| 2020 | 6 | 1  | 17 | 11.7 | 148 | 604 | 455  | 998  | 20.9 | 304 | 3.3 |
| 2020 | 6 | 1  | 18 | 13.1 | 103 | 471 | 253  | 998  | 19.1 | 302 | 2.1 |
| 2020 | 6 | 1  | 19 | 13.5 | 48  | 175 | 69   | 998  | 15.9 | 305 | 1.2 |
| 2020 | 6 | 1  | 20 | 12.8 | 0   | 0   | 0    | 999  | 14.3 | 309 | 1.2 |
| 2020 | 6 | 1  | 21 | 12.7 | 0   | 0   | 0    | 999  | 13.9 | 314 | 1.1 |
| 2020 | 6 | 1  | 22 | 12.7 | 0   | 0   | 0    | 999  | 14   | 322 | 1   |
| 2020 | 6 | 1  | 23 | 12.4 | 0   | 0   | 0    | 999  | 14.2 | 320 | 0.9 |

|      |   |   |    |      |     |     |     |     |      |     |     |
|------|---|---|----|------|-----|-----|-----|-----|------|-----|-----|
| 2020 | 6 | 2 | 0  | 12   | 0   | 0   | 0   | 998 | 14.5 | 303 | 0.7 |
| 2020 | 6 | 2 | 1  | 11.8 | 0   | 0   | 0   | 998 | 14.1 | 285 | 0.8 |
| 2020 | 6 | 2 | 2  | 11.5 | 0   | 0   | 0   | 998 | 14.1 | 279 | 0.6 |
| 2020 | 6 | 2 | 3  | 11.1 | 0   | 0   | 0   | 998 | 13.9 | 265 | 0.5 |
| 2020 | 6 | 2 | 4  | 10.5 | 0   | 0   | 0   | 998 | 13.9 | 204 | 0.4 |
| 2020 | 6 | 2 | 5  | 9.6  | 0   | 0   | 0   | 997 | 12.9 | 162 | 0.8 |
| 2020 | 6 | 2 | 6  | 11.6 | 24  | 0   | 24  | 997 | 14.2 | 159 | 1   |
| 2020 | 6 | 2 | 7  | 10.9 | 84  | 0   | 84  | 997 | 16.4 | 156 | 1.8 |
| 2020 | 6 | 2 | 8  | 11.7 | 185 | 369 | 371 | 997 | 18.8 | 157 | 2.2 |
| 2020 | 6 | 2 | 9  | 10.3 | 166 | 700 | 640 | 996 | 21.3 | 169 | 2.8 |
| 2020 | 6 | 2 | 10 | 10.4 | 181 | 763 | 804 | 996 | 22.2 | 170 | 3.1 |
| 2020 | 6 | 2 | 11 | 11   | 188 | 799 | 920 | 995 | 23.1 | 177 | 3.5 |
| 2020 | 6 | 2 | 12 | 11.6 | 207 | 794 | 976 | 995 | 24.2 | 187 | 3.8 |
| 2020 | 6 | 2 | 13 | 12.2 | 484 | 235 | 712 | 995 | 24.7 | 198 | 3.9 |
| 2020 | 6 | 2 | 14 | 13   | 235 | 722 | 898 | 994 | 24.9 | 201 | 3.8 |
| 2020 | 6 | 2 | 15 | 14   | 314 | 27  | 336 | 994 | 24.7 | 201 | 3.7 |
| 2020 | 6 | 2 | 16 | 15.1 | 235 | 549 | 609 | 993 | 24.2 | 198 | 3.5 |
| 2020 | 6 | 2 | 17 | 15.9 | 211 | 401 | 416 | 993 | 23.1 | 195 | 3.2 |
| 2020 | 6 | 2 | 18 | 16.9 | 150 | 226 | 222 | 993 | 21.3 | 191 | 2.2 |
| 2020 | 6 | 2 | 19 | 17   | 44  | 49  | 50  | 994 | 19   | 189 | 1.4 |
| 2020 | 6 | 2 | 20 | 16.8 | 0   | 0   | 0   | 995 | 18.2 | 192 | 1.2 |
| 2020 | 6 | 2 | 21 | 16.8 | 0   | 0   | 0   | 995 | 17.9 | 195 | 0.9 |
| 2020 | 6 | 2 | 22 | 16.6 | 0   | 0   | 0   | 995 | 17.5 | 203 | 0.9 |
| 2020 | 6 | 2 | 23 | 16.4 | 0   | 0   | 0   | 995 | 17.2 | 214 | 0.9 |
| 2020 | 6 | 3 | 0  | 16.2 | 0   | 0   | 0   | 994 | 16.7 | 220 | 0.9 |
| 2020 | 6 | 3 | 1  | 16.2 | 0   | 0   | 0   | 994 | 16.3 | 221 | 0.9 |
| 2020 | 6 | 3 | 2  | 15.9 | 0   | 0   | 0   | 993 | 15.9 | 212 | 0.8 |
| 2020 | 6 | 3 | 3  | 15.9 | 0   | 0   | 0   | 993 | 15.9 | 201 | 0.8 |
| 2020 | 6 | 3 | 4  | 16   | 0   | 0   | 0   | 993 | 16   | 190 | 0.7 |
| 2020 | 6 | 3 | 5  | 16   | 0   | 0   | 0   | 993 | 16   | 178 | 0.7 |
| 2020 | 6 | 3 | 6  | 16.6 | 32  | 0   | 32  | 994 | 16.9 | 169 | 1   |
| 2020 | 6 | 3 | 7  | 16.8 | 91  | 0   | 91  | 994 | 17.7 | 167 | 1.7 |
| 2020 | 6 | 3 | 8  | 17.4 | 132 | 0   | 132 | 993 | 18.8 | 161 | 1.9 |
| 2020 | 6 | 3 | 9  | 18.4 | 229 | 15  | 239 | 993 | 20.5 | 165 | 1.9 |
| 2020 | 6 | 3 | 10 | 19.5 | 377 | 80  | 443 | 993 | 22.6 | 182 | 1.9 |
| 2020 | 6 | 3 | 11 | 20   | 452 | 118 | 561 | 993 | 24.1 | 186 | 2.2 |
| 2020 | 6 | 3 | 12 | 20.6 | 458 | 70  | 526 | 992 | 25.4 | 184 | 2.4 |
| 2020 | 6 | 3 | 13 | 20.9 | 377 | 27  | 404 | 992 | 26.2 | 191 | 2.5 |
| 2020 | 6 | 3 | 14 | 21   | 363 | 30  | 390 | 991 | 26.4 | 202 | 2.7 |
| 2020 | 6 | 3 | 15 | 21   | 384 | 269 | 604 | 991 | 26.2 | 209 | 2.9 |
| 2020 | 6 | 3 | 16 | 20.8 | 286 | 335 | 514 | 991 | 25.6 | 213 | 3.2 |
| 2020 | 6 | 3 | 17 | 20.7 | 213 | 224 | 328 | 991 | 24.4 | 214 | 3.2 |
| 2020 | 6 | 3 | 18 | 20.8 | 160 | 103 | 194 | 992 | 22.9 | 209 | 2.6 |
| 2020 | 6 | 3 | 19 | 20.7 | 31  | 15  | 32  | 992 | 21.4 | 199 | 1.7 |
| 2020 | 6 | 3 | 20 | 20.4 | 0   | 0   | 0   | 992 | 20.4 | 195 | 1.5 |
| 2020 | 6 | 3 | 21 | 19.9 | 0   | 0   | 0   | 992 | 19.9 | 199 | 1.4 |
| 2020 | 6 | 3 | 22 | 19.6 | 0   | 0   | 0   | 993 | 19.6 | 210 | 1.5 |
| 2020 | 6 | 3 | 23 | 19.2 | 0   | 0   | 0   | 992 | 19.2 | 219 | 1.6 |
| 2020 | 6 | 4 | 0  | 18.6 | 0   | 0   | 0   | 992 | 18.6 | 224 | 1.6 |
| 2020 | 6 | 4 | 1  | 18.2 | 0   | 0   | 0   | 992 | 18.2 | 228 | 1.6 |

|      |   |   |    |      |     |     |     |     |      |     |     |
|------|---|---|----|------|-----|-----|-----|-----|------|-----|-----|
| 2020 | 6 | 4 | 2  | 17.8 | 0   | 0   | 0   | 992 | 17.8 | 233 | 1.5 |
| 2020 | 6 | 4 | 3  | 17.1 | 0   | 0   | 0   | 992 | 17.1 | 240 | 1.1 |
| 2020 | 6 | 4 | 4  | 16.5 | 0   | 0   | 0   | 992 | 16.5 | 245 | 0.9 |
| 2020 | 6 | 4 | 5  | 16.5 | 0   | 0   | 0   | 992 | 16.5 | 241 | 0.9 |
| 2020 | 6 | 4 | 6  | 18.2 | 48  | 103 | 60  | 992 | 18.7 | 231 | 1.2 |
| 2020 | 6 | 4 | 7  | 18.4 | 121 | 363 | 236 | 993 | 20.4 | 238 | 1.8 |
| 2020 | 6 | 4 | 8  | 19   | 199 | 296 | 349 | 993 | 22.1 | 249 | 2.1 |
| 2020 | 6 | 4 | 9  | 19.8 | 201 | 623 | 624 | 993 | 23.8 | 254 | 2.3 |
| 2020 | 6 | 4 | 10 | 20.6 | 264 | 593 | 749 | 993 | 25.1 | 249 | 2.3 |
| 2020 | 6 | 4 | 11 | 21.1 | 241 | 718 | 899 | 993 | 26.1 | 241 | 2.4 |
| 2020 | 6 | 4 | 12 | 21.3 | 213 | 777 | 966 | 993 | 27   | 237 | 2.8 |
| 2020 | 6 | 4 | 13 | 21.5 | 222 | 766 | 964 | 992 | 27.4 | 238 | 3.2 |
| 2020 | 6 | 4 | 14 | 21.4 | 387 | 409 | 763 | 992 | 27.5 | 241 | 3.4 |
| 2020 | 6 | 4 | 15 | 21.2 | 208 | 702 | 785 | 992 | 27.2 | 247 | 3.5 |
| 2020 | 6 | 4 | 16 | 21   | 210 | 595 | 617 | 993 | 26.4 | 252 | 3.5 |
| 2020 | 6 | 4 | 17 | 20.8 | 198 | 437 | 422 | 993 | 25.2 | 253 | 3.3 |
| 2020 | 6 | 4 | 18 | 20.7 | 118 | 237 | 194 | 993 | 23.5 | 250 | 2.5 |
| 2020 | 6 | 4 | 19 | 20.4 | 44  | 55  | 51  | 993 | 21   | 242 | 1.2 |
| 2020 | 6 | 4 | 20 | 19.2 | 0   | 0   | 0   | 993 | 19.2 | 234 | 0.9 |
| 2020 | 6 | 4 | 21 | 18.4 | 0   | 0   | 0   | 994 | 18.4 | 230 | 0.9 |
| 2020 | 6 | 4 | 22 | 17.9 | 0   | 0   | 0   | 994 | 17.9 | 228 | 0.8 |
| 2020 | 6 | 4 | 23 | 17.5 | 0   | 0   | 0   | 994 | 17.5 | 229 | 0.8 |
| 2020 | 6 | 5 | 0  | 17.4 | 0   | 0   | 0   | 994 | 17.4 | 231 | 0.9 |
| 2020 | 6 | 5 | 1  | 17.4 | 0   | 0   | 0   | 994 | 17.4 | 241 | 0.9 |
| 2020 | 6 | 5 | 2  | 16.8 | 0   | 0   | 0   | 994 | 16.8 | 247 | 0.9 |
| 2020 | 6 | 5 | 3  | 16.8 | 0   | 0   | 0   | 994 | 16.8 | 243 | 0.9 |
| 2020 | 6 | 5 | 4  | 16.8 | 0   | 0   | 0   | 994 | 16.8 | 248 | 0.9 |
| 2020 | 6 | 5 | 5  | 16.5 | 0   | 0   | 0   | 995 | 16.5 | 249 | 0.9 |
| 2020 | 6 | 5 | 6  | 17.9 | 17  | 0   | 17  | 995 | 18.3 | 250 | 1   |
| 2020 | 6 | 5 | 7  | 18.6 | 114 | 27  | 122 | 995 | 19.9 | 265 | 1.3 |
| 2020 | 6 | 5 | 8  | 19.2 | 215 | 113 | 272 | 996 | 21.3 | 289 | 1.5 |
| 2020 | 6 | 5 | 9  | 19.8 | 302 | 246 | 469 | 996 | 22.6 | 302 | 1.7 |
| 2020 | 6 | 5 | 10 | 20.2 | 338 | 395 | 662 | 996 | 23.8 | 307 | 1.9 |
| 2020 | 6 | 5 | 11 | 20.6 | 417 | 347 | 736 | 995 | 24.5 | 304 | 1.9 |
| 2020 | 6 | 5 | 12 | 20.9 | 417 | 453 | 856 | 995 | 25   | 291 | 2.2 |
| 2020 | 6 | 5 | 13 | 20.9 | 334 | 609 | 925 | 995 | 25   | 281 | 2.4 |
| 2020 | 6 | 5 | 14 | 20.8 | 381 | 426 | 773 | 995 | 24.7 | 266 | 2.4 |
| 2020 | 6 | 5 | 15 | 20.7 | 358 | 364 | 657 | 995 | 24.3 | 251 | 2.5 |
| 2020 | 6 | 5 | 16 | 20.5 | 293 | 308 | 504 | 995 | 23.7 | 248 | 2.4 |
| 2020 | 6 | 5 | 17 | 20.4 | 240 | 332 | 411 | 995 | 22.7 | 260 | 2.2 |
| 2020 | 6 | 5 | 18 | 20.3 | 158 | 181 | 217 | 995 | 21.5 | 280 | 1.8 |
| 2020 | 6 | 5 | 19 | 19.9 | 41  | 34  | 46  | 996 | 20.1 | 297 | 1.3 |
| 2020 | 6 | 5 | 20 | 19   | 0   | 0   | 0   | 996 | 19   | 301 | 0.9 |
| 2020 | 6 | 5 | 21 | 18.7 | 0   | 0   | 0   | 996 | 18.7 | 305 | 0.7 |
| 2020 | 6 | 5 | 22 | 18.6 | 0   | 0   | 0   | 996 | 18.9 | 327 | 0.5 |
| 2020 | 6 | 5 | 23 | 18.5 | 0   | 0   | 0   | 996 | 19   | 13  | 0.5 |
| 2020 | 6 | 6 | 0  | 18.4 | 0   | 0   | 0   | 996 | 18.5 | 32  | 0.7 |
| 2020 | 6 | 6 | 1  | 18.1 | 0   | 0   | 0   | 996 | 18.1 | 42  | 0.8 |
| 2020 | 6 | 6 | 2  | 17.9 | 0   | 0   | 0   | 996 | 17.9 | 62  | 0.8 |
| 2020 | 6 | 6 | 3  | 17.8 | 0   | 0   | 0   | 995 | 17.8 | 87  | 0.9 |

|      |   |   |    |      |     |     |     |      |      |     |     |
|------|---|---|----|------|-----|-----|-----|------|------|-----|-----|
| 2020 | 6 | 6 | 4  | 17.7 | 0   | 0   | 0   | 995  | 17.7 | 108 | 1.2 |
| 2020 | 6 | 6 | 5  | 18   | 0   | 0   | 0   | 995  | 18   | 117 | 1.6 |
| 2020 | 6 | 6 | 6  | 18.9 | 33  | 22  | 36  | 996  | 19.3 | 115 | 2.3 |
| 2020 | 6 | 6 | 7  | 19.1 | 158 | 126 | 197 | 996  | 20.1 | 112 | 2.6 |
| 2020 | 6 | 6 | 8  | 19.2 | 264 | 246 | 389 | 996  | 21.2 | 116 | 3.1 |
| 2020 | 6 | 6 | 9  | 19.6 | 295 | 281 | 486 | 996  | 22.9 | 121 | 3.6 |
| 2020 | 6 | 6 | 10 | 19.9 | 403 | 386 | 719 | 996  | 24.3 | 123 | 3.4 |
| 2020 | 6 | 6 | 11 | 20.2 | 415 | 457 | 835 | 996  | 25.7 | 126 | 2.6 |
| 2020 | 6 | 6 | 12 | 20.4 | 360 | 568 | 910 | 996  | 26.8 | 133 | 2   |
| 2020 | 6 | 6 | 13 | 20.5 | 354 | 576 | 913 | 996  | 27.5 | 152 | 1.5 |
| 2020 | 6 | 6 | 14 | 20.6 | 347 | 25  | 371 | 995  | 27.8 | 181 | 1.1 |
| 2020 | 6 | 6 | 15 | 20.5 | 391 | 240 | 589 | 995  | 27.6 | 180 | 1.3 |
| 2020 | 6 | 6 | 16 | 20.6 | 315 | 135 | 407 | 995  | 26.9 | 190 | 1.8 |
| 2020 | 6 | 6 | 17 | 21.3 | 264 | 258 | 397 | 995  | 25.8 | 221 | 1.4 |
| 2020 | 6 | 6 | 18 | 21.1 | 77  | 0   | 77  | 995  | 24.5 | 250 | 1.5 |
| 2020 | 6 | 6 | 19 | 21   | 21  | 0   | 21  | 996  | 22.5 | 271 | 1.5 |
| 2020 | 6 | 6 | 20 | 20.6 | 0   | 0   | 0   | 997  | 21.1 | 272 | 1.2 |
| 2020 | 6 | 6 | 21 | 20.1 | 0   | 0   | 0   | 997  | 20.3 | 263 | 0.8 |
| 2020 | 6 | 6 | 22 | 19.6 | 0   | 0   | 0   | 998  | 19.7 | 232 | 0.5 |
| 2020 | 6 | 6 | 23 | 19.2 | 0   | 0   | 0   | 998  | 19.3 | 194 | 0.6 |
| 2020 | 6 | 7 | 0  | 18.8 | 0   | 0   | 0   | 998  | 18.8 | 173 | 0.8 |
| 2020 | 6 | 7 | 1  | 18.3 | 0   | 0   | 0   | 998  | 18.3 | 162 | 0.9 |
| 2020 | 6 | 7 | 2  | 17.7 | 0   | 0   | 0   | 998  | 17.8 | 150 | 1   |
| 2020 | 6 | 7 | 3  | 16.7 | 0   | 0   | 0   | 998  | 17.2 | 142 | 1.4 |
| 2020 | 6 | 7 | 4  | 15.6 | 0   | 0   | 0   | 998  | 16.4 | 136 | 1.4 |
| 2020 | 6 | 7 | 5  | 15   | 0   | 0   | 0   | 999  | 16.1 | 127 | 1.1 |
| 2020 | 6 | 7 | 6  | 15.2 | 38  | 33  | 42  | 1000 | 17.8 | 115 | 1.5 |
| 2020 | 6 | 7 | 7  | 14.1 | 158 | 167 | 211 | 1001 | 19.4 | 118 | 1.8 |
| 2020 | 6 | 7 | 8  | 14.5 | 246 | 319 | 408 | 1001 | 21.7 | 138 | 1.8 |
| 2020 | 6 | 7 | 9  | 16.3 | 292 | 450 | 597 | 1000 | 23.5 | 153 | 1.5 |
| 2020 | 6 | 7 | 10 | 17.5 | 317 | 538 | 758 | 1000 | 25   | 163 | 1.4 |
| 2020 | 6 | 7 | 11 | 18.3 | 336 | 585 | 873 | 999  | 26.2 | 181 | 1.5 |
| 2020 | 6 | 7 | 12 | 18.7 | 350 | 598 | 930 | 999  | 27   | 199 | 1.7 |
| 2020 | 6 | 7 | 13 | 18.9 | 354 | 592 | 929 | 999  | 27.5 | 208 | 2   |
| 2020 | 6 | 7 | 14 | 19   | 351 | 562 | 869 | 999  | 27.6 | 211 | 2.1 |
| 2020 | 6 | 7 | 15 | 19   | 354 | 482 | 751 | 998  | 27.4 | 215 | 2.1 |
| 2020 | 6 | 7 | 16 | 18.9 | 315 | 409 | 595 | 998  | 26.8 | 221 | 1.9 |
| 2020 | 6 | 7 | 17 | 19.1 | 244 | 328 | 414 | 998  | 26.1 | 230 | 1.7 |
| 2020 | 6 | 7 | 18 | 19.3 | 155 | 213 | 225 | 998  | 24.8 | 236 | 1.2 |
| 2020 | 6 | 7 | 19 | 19.5 | 49  | 62  | 57  | 999  | 22.2 | 245 | 0.6 |
| 2020 | 6 | 7 | 20 | 18.1 | 0   | 0   | 0   | 999  | 20.9 | 263 | 0.5 |
| 2020 | 6 | 7 | 21 | 17.5 | 0   | 0   | 0   | 1000 | 20.3 | 315 | 0.4 |
| 2020 | 6 | 7 | 22 | 16.9 | 0   | 0   | 0   | 1001 | 20.4 | 16  | 0.3 |
| 2020 | 6 | 7 | 23 | 16.6 | 0   | 0   | 0   | 1000 | 19.2 | 164 | 0.7 |
| 2020 | 6 | 8 | 0  | 16.2 | 0   | 0   | 0   | 1000 | 18.1 | 162 | 0.9 |
| 2020 | 6 | 8 | 1  | 15.5 | 0   | 0   | 0   | 1001 | 18   | 148 | 0.8 |
| 2020 | 6 | 8 | 2  | 15   | 0   | 0   | 0   | 1001 | 18   | 131 | 0.7 |
| 2020 | 6 | 8 | 3  | 14.4 | 0   | 0   | 0   | 1001 | 17.3 | 127 | 0.7 |
| 2020 | 6 | 8 | 4  | 13.7 | 0   | 0   | 0   | 1001 | 16.8 | 123 | 0.8 |
| 2020 | 6 | 8 | 5  | 13.3 | 0   | 0   | 0   | 1002 | 16.7 | 111 | 0.8 |

|      |   |    |    |      |     |     |     |      |      |     |     |
|------|---|----|----|------|-----|-----|-----|------|------|-----|-----|
| 2020 | 6 | 8  | 6  | 15.1 | 48  | 114 | 62  | 1002 | 18.5 | 96  | 0.9 |
| 2020 | 6 | 8  | 7  | 13.8 | 121 | 359 | 235 | 1002 | 20.2 | 87  | 1.6 |
| 2020 | 6 | 8  | 8  | 14.7 | 166 | 527 | 434 | 1002 | 22.9 | 84  | 1.5 |
| 2020 | 6 | 8  | 9  | 16   | 195 | 635 | 625 | 1002 | 25.3 | 89  | 1.4 |
| 2020 | 6 | 8  | 10 | 17   | 212 | 705 | 789 | 1002 | 27   | 106 | 1.5 |
| 2020 | 6 | 8  | 11 | 17.5 | 220 | 748 | 907 | 1002 | 28.3 | 131 | 1.8 |
| 2020 | 6 | 8  | 12 | 17.5 | 173 | 837 | 985 | 1002 | 29.1 | 151 | 2.2 |
| 2020 | 6 | 8  | 13 | 17.2 | 170 | 843 | 990 | 1001 | 29.3 | 160 | 2.7 |
| 2020 | 6 | 8  | 14 | 16.8 | 163 | 834 | 933 | 1001 | 29.1 | 160 | 3   |
| 2020 | 6 | 8  | 15 | 16   | 179 | 765 | 811 | 1001 | 28.5 | 158 | 3.1 |
| 2020 | 6 | 8  | 16 | 15.5 | 159 | 720 | 654 | 1001 | 27.6 | 156 | 2.9 |
| 2020 | 6 | 8  | 17 | 15.9 | 132 | 641 | 464 | 1002 | 26.4 | 154 | 2.3 |
| 2020 | 6 | 8  | 18 | 16.2 | 99  | 499 | 263 | 1002 | 24.6 | 150 | 1.7 |
| 2020 | 6 | 8  | 19 | 16.3 | 49  | 228 | 79  | 1002 | 21.1 | 151 | 1   |
| 2020 | 6 | 8  | 20 | 14.2 | 0   | 0   | 0   | 1003 | 19.8 | 148 | 1.1 |
| 2020 | 6 | 8  | 21 | 13.3 | 0   | 0   | 0   | 1003 | 19.3 | 143 | 1.1 |
| 2020 | 6 | 8  | 22 | 12.6 | 0   | 0   | 0   | 1004 | 19   | 136 | 1.1 |
| 2020 | 6 | 8  | 23 | 12.2 | 0   | 0   | 0   | 1004 | 18.4 | 126 | 1   |
| 2020 | 6 | 9  | 0  | 11.7 | 0   | 0   | 0   | 1003 | 18.1 | 114 | 1.1 |
| 2020 | 6 | 9  | 1  | 11.5 | 0   | 0   | 0   | 1003 | 17.3 | 108 | 1.2 |
| 2020 | 6 | 9  | 2  | 11.4 | 0   | 0   | 0   | 1003 | 16.3 | 109 | 1.3 |
| 2020 | 6 | 9  | 3  | 11.2 | 0   | 0   | 0   | 1002 | 15.7 | 112 | 1.4 |
| 2020 | 6 | 9  | 4  | 11.1 | 0   | 0   | 0   | 1002 | 15.5 | 115 | 1.4 |
| 2020 | 6 | 9  | 5  | 11.5 | 0   | 0   | 0   | 1003 | 15.5 | 116 | 1.5 |
| 2020 | 6 | 9  | 6  | 14.4 | 48  | 171 | 69  | 1003 | 18.5 | 115 | 1.4 |
| 2020 | 6 | 9  | 7  | 13.9 | 112 | 426 | 247 | 1003 | 21.3 | 113 | 2.1 |
| 2020 | 6 | 9  | 8  | 15   | 156 | 573 | 446 | 1003 | 23.4 | 119 | 2.1 |
| 2020 | 6 | 9  | 9  | 16.3 | 187 | 661 | 636 | 1003 | 26   | 135 | 2.5 |
| 2020 | 6 | 9  | 10 | 17.5 | 209 | 718 | 797 | 1003 | 27.4 | 140 | 2.9 |
| 2020 | 6 | 9  | 11 | 18.5 | 223 | 749 | 911 | 1002 | 28.3 | 144 | 3.2 |
| 2020 | 6 | 9  | 12 | 19.1 | 197 | 806 | 979 | 1002 | 28.9 | 148 | 3.3 |
| 2020 | 6 | 9  | 13 | 19.6 | 192 | 811 | 981 | 1002 | 29.1 | 150 | 3.3 |
| 2020 | 6 | 9  | 14 | 19.8 | 374 | 476 | 813 | 1001 | 29.1 | 152 | 3.2 |
| 2020 | 6 | 9  | 15 | 19.9 | 171 | 771 | 808 | 1001 | 28.9 | 154 | 3   |
| 2020 | 6 | 9  | 16 | 19.9 | 302 | 272 | 490 | 1001 | 28.4 | 156 | 2.7 |
| 2020 | 6 | 9  | 17 | 20.1 | 123 | 657 | 463 | 1001 | 27.6 | 158 | 2.3 |
| 2020 | 6 | 9  | 18 | 20.7 | 91  | 520 | 263 | 1001 | 26.1 | 162 | 1.6 |
| 2020 | 6 | 9  | 19 | 20.7 | 46  | 259 | 81  | 1001 | 23.2 | 165 | 1   |
| 2020 | 6 | 9  | 20 | 19.5 | 0   | 0   | 0   | 1002 | 21.6 | 162 | 0.9 |
| 2020 | 6 | 9  | 21 | 19.2 | 0   | 0   | 0   | 1002 | 21.1 | 151 | 0.9 |
| 2020 | 6 | 9  | 22 | 18.9 | 0   | 0   | 0   | 1002 | 20.6 | 142 | 0.9 |
| 2020 | 6 | 9  | 23 | 19.1 | 0   | 0   | 0   | 1002 | 20.6 | 137 | 0.9 |
| 2020 | 6 | 10 | 0  | 19.1 | 0   | 0   | 0   | 1001 | 20.5 | 134 | 0.9 |
| 2020 | 6 | 10 | 1  | 18.9 | 0   | 0   | 0   | 1001 | 20.2 | 131 | 1   |
| 2020 | 6 | 10 | 2  | 18.6 | 0   | 0   | 0   | 1000 | 19.8 | 127 | 1.1 |
| 2020 | 6 | 10 | 3  | 18.3 | 0   | 0   | 0   | 1000 | 19.4 | 124 | 1.1 |
| 2020 | 6 | 10 | 4  | 18.3 | 0   | 0   | 0   | 1000 | 19.4 | 121 | 1.1 |
| 2020 | 6 | 10 | 5  | 18.3 | 0   | 0   | 0   | 1000 | 19.5 | 118 | 1.1 |
| 2020 | 6 | 10 | 6  | 19.1 | 42  | 232 | 70  | 1000 | 21   | 112 | 1.4 |
| 2020 | 6 | 10 | 7  | 18.9 | 82  | 527 | 249 | 1000 | 23   | 109 | 2.3 |

|      |   |    |    |      |     |     |     |     |      |     |     |
|------|---|----|----|------|-----|-----|-----|-----|------|-----|-----|
| 2020 | 6 | 10 | 8  | 19.1 | 177 | 402 | 381 | 999 | 25.6 | 115 | 2.5 |
| 2020 | 6 | 10 | 9  | 19.4 | 121 | 766 | 640 | 999 | 26.9 | 121 | 2.6 |
| 2020 | 6 | 10 | 10 | 19.8 | 307 | 466 | 688 | 998 | 27.7 | 132 | 2.6 |
| 2020 | 6 | 10 | 11 | 20.4 | 140 | 839 | 911 | 998 | 29   | 141 | 3   |
| 2020 | 6 | 10 | 12 | 20.8 | 154 | 837 | 967 | 997 | 29.5 | 148 | 3.2 |
| 2020 | 6 | 10 | 13 | 20.8 | 467 | 304 | 763 | 996 | 29.2 | 157 | 3.3 |
| 2020 | 6 | 10 | 14 | 20.7 | 452 | 244 | 677 | 995 | 28   | 163 | 3.3 |
| 2020 | 6 | 10 | 15 | 20.9 | 366 | 59  | 415 | 995 | 26.4 | 168 | 3.2 |
| 2020 | 6 | 10 | 16 | 21.2 | 309 | 92  | 373 | 995 | 24.5 | 171 | 2.9 |
| 2020 | 6 | 10 | 17 | 21.4 | 215 | 72  | 253 | 995 | 23.2 | 167 | 2.4 |
| 2020 | 6 | 10 | 18 | 21.5 | 11  | 0   | 11  | 995 | 22.5 | 150 | 1.8 |
| 2020 | 6 | 10 | 19 | 21.4 | 25  | 0   | 25  | 995 | 21.9 | 133 | 1.6 |
| 2020 | 6 | 10 | 20 | 21   | 0   | 0   | 0   | 995 | 21.5 | 127 | 2   |
| 2020 | 6 | 10 | 21 | 20.8 | 0   | 0   | 0   | 994 | 21.2 | 126 | 2.5 |
| 2020 | 6 | 10 | 22 | 20.7 | 0   | 0   | 0   | 994 | 21.1 | 130 | 2.5 |
| 2020 | 6 | 10 | 23 | 20.7 | 0   | 0   | 0   | 994 | 21   | 133 | 2.5 |
| 2020 | 6 | 11 | 0  | 20.6 | 0   | 0   | 0   | 993 | 20.9 | 138 | 2.3 |
| 2020 | 6 | 11 | 1  | 20.6 | 0   | 0   | 0   | 992 | 20.9 | 147 | 2.2 |
| 2020 | 6 | 11 | 2  | 20.8 | 0   | 0   | 0   | 992 | 21   | 166 | 1.8 |
| 2020 | 6 | 11 | 3  | 21   | 0   | 0   | 0   | 991 | 21   | 187 | 1.5 |
| 2020 | 6 | 11 | 4  | 20.9 | 0   | 0   | 0   | 991 | 20.9 | 204 | 1.2 |
| 2020 | 6 | 11 | 5  | 20.6 | 0   | 0   | 0   | 991 | 20.6 | 226 | 0.9 |
| 2020 | 6 | 11 | 6  | 21.4 | 20  | 0   | 20  | 991 | 21.7 | 250 | 1.6 |
| 2020 | 6 | 11 | 7  | 22.2 | 60  | 0   | 60  | 991 | 22.9 | 271 | 1.8 |
| 2020 | 6 | 11 | 8  | 23   | 77  | 0   | 77  | 991 | 24.5 | 290 | 2.1 |
| 2020 | 6 | 11 | 9  | 23.3 | 146 | 693 | 616 | 991 | 26.1 | 300 | 2.1 |
| 2020 | 6 | 11 | 10 | 23.5 | 156 | 757 | 776 | 991 | 27.5 | 299 | 1.9 |
| 2020 | 6 | 11 | 11 | 23.8 | 161 | 795 | 891 | 991 | 28.6 | 291 | 1.7 |
| 2020 | 6 | 11 | 12 | 24.1 | 162 | 816 | 954 | 990 | 29.3 | 278 | 1.7 |
| 2020 | 6 | 11 | 13 | 24.1 | 165 | 815 | 957 | 990 | 29.8 | 268 | 1.8 |
| 2020 | 6 | 11 | 14 | 24.1 | 162 | 798 | 900 | 989 | 29.9 | 264 | 2.1 |
| 2020 | 6 | 11 | 15 | 24   | 154 | 767 | 790 | 989 | 29.6 | 268 | 2.5 |
| 2020 | 6 | 11 | 16 | 23.8 | 140 | 718 | 635 | 989 | 28.6 | 271 | 2.6 |
| 2020 | 6 | 11 | 17 | 23.7 | 119 | 636 | 450 | 990 | 27.5 | 271 | 2.6 |
| 2020 | 6 | 11 | 18 | 23.5 | 95  | 470 | 252 | 990 | 26   | 277 | 2.8 |
| 2020 | 6 | 11 | 19 | 23.1 | 49  | 190 | 75  | 991 | 24   | 285 | 2.4 |
| 2020 | 6 | 11 | 20 | 22.5 | 0   | 0   | 0   | 992 | 22.7 | 288 | 2   |
| 2020 | 6 | 11 | 21 | 21.8 | 0   | 0   | 0   | 993 | 22   | 297 | 1.4 |
| 2020 | 6 | 11 | 22 | 21.2 | 0   | 0   | 0   | 993 | 21.4 | 307 | 0.9 |
| 2020 | 6 | 11 | 23 | 21   | 0   | 0   | 0   | 993 | 21.1 | 315 | 0.5 |
| 2020 | 6 | 12 | 0  | 20.6 | 0   | 0   | 0   | 993 | 20.8 | 340 | 0.4 |
| 2020 | 6 | 12 | 1  | 20.2 | 0   | 0   | 0   | 992 | 20.8 | 27  | 0.2 |
| 2020 | 6 | 12 | 2  | 20.1 | 0   | 0   | 0   | 992 | 20.7 | 200 | 0.2 |
| 2020 | 6 | 12 | 3  | 20   | 0   | 0   | 0   | 992 | 20.2 | 221 | 0.5 |
| 2020 | 6 | 12 | 4  | 19.9 | 0   | 0   | 0   | 993 | 19.9 | 225 | 0.5 |
| 2020 | 6 | 12 | 5  | 19.9 | 0   | 0   | 0   | 993 | 20   | 228 | 0.5 |
| 2020 | 6 | 12 | 6  | 20.3 | 39  | 7   | 40  | 994 | 20.7 | 210 | 0.9 |
| 2020 | 6 | 12 | 7  | 20.7 | 86  | 488 | 241 | 994 | 21.7 | 205 | 1.4 |
| 2020 | 6 | 12 | 8  | 21.5 | 108 | 651 | 438 | 994 | 23.3 | 206 | 1.9 |
| 2020 | 6 | 12 | 9  | 22   | 153 | 0   | 153 | 994 | 24.7 | 201 | 2.3 |

|      |   |    |    |      |     |     |     |     |      |     |     |
|------|---|----|----|------|-----|-----|-----|-----|------|-----|-----|
| 2020 | 6 | 12 | 10 | 22.3 | 271 | 17  | 285 | 994 | 26   | 206 | 2.8 |
| 2020 | 6 | 12 | 11 | 22.4 | 444 | 96  | 532 | 994 | 26.8 | 220 | 3   |
| 2020 | 6 | 12 | 12 | 22.5 | 466 | 304 | 761 | 994 | 27.2 | 239 | 3   |
| 2020 | 6 | 12 | 13 | 22.6 | 206 | 755 | 940 | 993 | 27.6 | 250 | 2.4 |
| 2020 | 6 | 12 | 14 | 22.8 | 361 | 524 | 845 | 992 | 28.1 | 237 | 1.7 |
| 2020 | 6 | 12 | 15 | 22.6 | 303 | 505 | 721 | 992 | 28   | 225 | 1.7 |
| 2020 | 6 | 12 | 16 | 22.3 | 243 | 19  | 256 | 992 | 27.3 | 226 | 1.5 |
| 2020 | 6 | 12 | 17 | 22.4 | 224 | 157 | 306 | 992 | 26.4 | 234 | 1   |
| 2020 | 6 | 12 | 18 | 22.7 | 105 | 0   | 105 | 992 | 25.5 | 251 | 0.6 |
| 2020 | 6 | 12 | 19 | 22.9 | 47  | 72  | 57  | 992 | 24.1 | 207 | 0.2 |
| 2020 | 6 | 12 | 20 | 22.6 | 0   | 0   | 0   | 992 | 23.2 | 197 | 0.3 |
| 2020 | 6 | 12 | 21 | 22.5 | 0   | 0   | 0   | 993 | 22.8 | 177 | 0.4 |
| 2020 | 6 | 12 | 22 | 22.3 | 0   | 0   | 0   | 993 | 22.4 | 152 | 0.6 |
| 2020 | 6 | 12 | 23 | 22.1 | 0   | 0   | 0   | 992 | 22.1 | 148 | 0.9 |
| 2020 | 6 | 13 | 0  | 21.8 | 0   | 0   | 0   | 992 | 21.9 | 143 | 1   |
| 2020 | 6 | 13 | 1  | 21.6 | 0   | 0   | 0   | 991 | 21.6 | 137 | 1.1 |
| 2020 | 6 | 13 | 2  | 21.4 | 0   | 0   | 0   | 990 | 21.5 | 133 | 1.5 |
| 2020 | 6 | 13 | 3  | 21.3 | 0   | 0   | 0   | 990 | 21.5 | 140 | 1.8 |
| 2020 | 6 | 13 | 4  | 21.3 | 0   | 0   | 0   | 990 | 21.3 | 167 | 1.4 |
| 2020 | 6 | 13 | 5  | 21.1 | 0   | 0   | 0   | 991 | 21.1 | 223 | 1.3 |
| 2020 | 6 | 13 | 6  | 21.3 | 41  | 91  | 52  | 993 | 21.4 | 248 | 1.8 |
| 2020 | 6 | 13 | 7  | 21.6 | 62  | 0   | 62  | 993 | 22.1 | 257 | 2   |
| 2020 | 6 | 13 | 8  | 22.2 | 150 | 1   | 151 | 993 | 23.4 | 288 | 1.5 |
| 2020 | 6 | 13 | 9  | 22.6 | 303 | 95  | 368 | 993 | 24.7 | 320 | 0.6 |
| 2020 | 6 | 13 | 10 | 22.8 | 278 | 18  | 293 | 993 | 25.8 | 112 | 0.4 |
| 2020 | 6 | 13 | 11 | 22.9 | 393 | 42  | 432 | 993 | 26.2 | 145 | 1.5 |
| 2020 | 6 | 13 | 12 | 23.1 | 122 | 0   | 122 | 993 | 26.1 | 168 | 2.1 |
| 2020 | 6 | 13 | 13 | 23.3 | 490 | 129 | 616 | 993 | 25.6 | 180 | 2.4 |
| 2020 | 6 | 13 | 14 | 23.5 | 108 | 0   | 108 | 992 | 25.2 | 185 | 2.6 |
| 2020 | 6 | 13 | 15 | 23.8 | 276 | 17  | 290 | 992 | 25.2 | 194 | 2.6 |
| 2020 | 6 | 13 | 16 | 24   | 152 | 1   | 153 | 992 | 25.4 | 203 | 2.6 |
| 2020 | 6 | 13 | 17 | 24.1 | 126 | 0   | 126 | 992 | 25.5 | 216 | 2.5 |
| 2020 | 6 | 13 | 18 | 24.2 | 12  | 0   | 12  | 993 | 25.1 | 220 | 2.1 |
| 2020 | 6 | 13 | 19 | 23.9 | 7   | 0   | 7   | 993 | 24   | 218 | 1.2 |
| 2020 | 6 | 13 | 20 | 23.3 | 0   | 0   | 0   | 993 | 23.3 | 222 | 1.3 |
| 2020 | 6 | 13 | 21 | 23.1 | 0   | 0   | 0   | 994 | 23.1 | 227 | 1.6 |
| 2020 | 6 | 13 | 22 | 22.8 | 0   | 0   | 0   | 994 | 22.9 | 227 | 2.1 |
| 2020 | 6 | 13 | 23 | 22.5 | 0   | 0   | 0   | 994 | 22.6 | 221 | 2.3 |
| 2020 | 6 | 14 | 0  | 22.4 | 0   | 0   | 0   | 994 | 22.5 | 215 | 2.7 |
| 2020 | 6 | 14 | 1  | 22.5 | 0   | 0   | 0   | 994 | 22.6 | 217 | 3.4 |
| 2020 | 6 | 14 | 2  | 22.6 | 0   | 0   | 0   | 993 | 22.8 | 225 | 3.8 |
| 2020 | 6 | 14 | 3  | 22.2 | 0   | 0   | 0   | 993 | 22.5 | 231 | 3.2 |
| 2020 | 6 | 14 | 4  | 22.1 | 0   | 0   | 0   | 993 | 22.2 | 226 | 2.5 |
| 2020 | 6 | 14 | 5  | 22   | 0   | 0   | 0   | 992 | 22   | 211 | 2.1 |
| 2020 | 6 | 14 | 6  | 22.1 | 21  | 0   | 21  | 992 | 22.3 | 195 | 2.7 |
| 2020 | 6 | 14 | 7  | 22.6 | 81  | 0   | 81  | 992 | 22.9 | 186 | 3.3 |
| 2020 | 6 | 14 | 8  | 23.2 | 47  | 0   | 47  | 991 | 23.5 | 188 | 4   |
| 2020 | 6 | 14 | 9  | 23.9 | 115 | 0   | 115 | 991 | 24.4 | 217 | 5.5 |
| 2020 | 6 | 14 | 10 | 23.7 | 148 | 2   | 150 | 991 | 24.6 | 248 | 6.5 |
| 2020 | 6 | 14 | 11 | 22.9 | 108 | 0   | 108 | 992 | 24.5 | 272 | 5.4 |

|      |   |    |    |      |     |     |      |     |      |     |     |
|------|---|----|----|------|-----|-----|------|-----|------|-----|-----|
| 2020 | 6 | 14 | 12 | 23.4 | 115 | 0   | 115  | 992 | 26   | 293 | 4.4 |
| 2020 | 6 | 14 | 13 | 23.7 | 187 | 9   | 196  | 992 | 27.2 | 302 | 4.1 |
| 2020 | 6 | 14 | 14 | 23.5 | 316 | 19  | 334  | 992 | 27.3 | 302 | 4.3 |
| 2020 | 6 | 14 | 15 | 23   | 304 | 23  | 323  | 993 | 26.8 | 301 | 4.6 |
| 2020 | 6 | 14 | 16 | 22.3 | 177 | 645 | 624  | 994 | 25.7 | 299 | 4.5 |
| 2020 | 6 | 14 | 17 | 21.4 | 186 | 401 | 396  | 994 | 24.6 | 297 | 3.9 |
| 2020 | 6 | 14 | 18 | 20.8 | 130 | 81  | 157  | 995 | 23.3 | 293 | 3.1 |
| 2020 | 6 | 14 | 19 | 20.5 | 34  | 0   | 34   | 995 | 21.3 | 287 | 1.7 |
| 2020 | 6 | 14 | 20 | 19.8 | 0   | 0   | 0    | 996 | 19.8 | 281 | 1.3 |
| 2020 | 6 | 14 | 21 | 19.1 | 0   | 0   | 0    | 996 | 19.1 | 279 | 1.3 |
| 2020 | 6 | 14 | 22 | 18.6 | 0   | 0   | 0    | 996 | 18.6 | 276 | 1.2 |
| 2020 | 6 | 14 | 23 | 18.1 | 0   | 0   | 0    | 996 | 18.1 | 273 | 1.2 |
| 2020 | 6 | 15 | 0  | 17.8 | 0   | 0   | 0    | 996 | 17.8 | 274 | 1.2 |
| 2020 | 6 | 15 | 1  | 17.7 | 0   | 0   | 0    | 996 | 17.7 | 281 | 1.3 |
| 2020 | 6 | 15 | 2  | 17.1 | 0   | 0   | 0    | 996 | 17.1 | 287 | 1.3 |
| 2020 | 6 | 15 | 3  | 16.4 | 0   | 0   | 0    | 996 | 16.4 | 294 | 1.2 |
| 2020 | 6 | 15 | 4  | 15.9 | 0   | 0   | 0    | 996 | 15.9 | 303 | 1.1 |
| 2020 | 6 | 15 | 5  | 16.3 | 0   | 0   | 0    | 996 | 16.3 | 313 | 1   |
| 2020 | 6 | 15 | 6  | 18   | 40  | 99  | 52   | 997 | 18.2 | 304 | 0.8 |
| 2020 | 6 | 15 | 7  | 17.1 | 112 | 264 | 195  | 997 | 20.5 | 291 | 1.7 |
| 2020 | 6 | 15 | 8  | 16.3 | 150 | 508 | 407  | 997 | 22.3 | 297 | 2   |
| 2020 | 6 | 15 | 9  | 16.5 | 152 | 696 | 623  | 997 | 23.8 | 305 | 2.2 |
| 2020 | 6 | 15 | 10 | 17   | 277 | 558 | 733  | 997 | 25.1 | 306 | 2.2 |
| 2020 | 6 | 15 | 11 | 17.5 | 334 | 566 | 853  | 996 | 26   | 298 | 2.2 |
| 2020 | 6 | 15 | 12 | 17.9 | 136 | 904 | 1014 | 996 | 26.6 | 288 | 2.4 |
| 2020 | 6 | 15 | 13 | 17.8 | 136 | 901 | 1014 | 995 | 26.9 | 284 | 2.7 |
| 2020 | 6 | 15 | 14 | 17.5 | 134 | 889 | 957  | 995 | 26.8 | 285 | 2.9 |
| 2020 | 6 | 15 | 15 | 17   | 126 | 865 | 844  | 994 | 25.7 | 289 | 2.8 |
| 2020 | 6 | 15 | 16 | 16.7 | 119 | 814 | 684  | 995 | 24.4 | 290 | 2.8 |
| 2020 | 6 | 15 | 17 | 16.8 | 109 | 725 | 489  | 995 | 23.1 | 288 | 2.5 |
| 2020 | 6 | 15 | 18 | 17.3 | 87  | 574 | 281  | 995 | 21.8 | 288 | 1.9 |
| 2020 | 6 | 15 | 19 | 17.4 | 49  | 294 | 90   | 995 | 19.3 | 287 | 1.1 |
| 2020 | 6 | 15 | 20 | 16.7 | 0   | 0   | 0    | 995 | 17.8 | 282 | 1   |
| 2020 | 6 | 15 | 21 | 17.4 | 0   | 0   | 0    | 996 | 17.4 | 280 | 1   |
| 2020 | 6 | 15 | 22 | 17.4 | 0   | 0   | 0    | 995 | 17.4 | 275 | 0.9 |
| 2020 | 6 | 15 | 23 | 17.3 | 0   | 0   | 0    | 995 | 17.3 | 272 | 0.9 |
| 2020 | 6 | 16 | 0  | 17.2 | 0   | 0   | 0    | 995 | 17.2 | 272 | 1   |
| 2020 | 6 | 16 | 1  | 17.2 | 0   | 0   | 0    | 995 | 17.2 | 272 | 1.1 |
| 2020 | 6 | 16 | 2  | 17   | 0   | 0   | 0    | 994 | 17   | 277 | 1.1 |
| 2020 | 6 | 16 | 3  | 16.3 | 0   | 0   | 0    | 994 | 16.3 | 283 | 1.2 |
| 2020 | 6 | 16 | 4  | 15.5 | 0   | 0   | 0    | 994 | 15.5 | 288 | 1.2 |
| 2020 | 6 | 16 | 5  | 15.7 | 0   | 0   | 0    | 995 | 15.7 | 290 | 1.2 |
| 2020 | 6 | 16 | 6  | 18.8 | 47  | 173 | 68   | 995 | 19   | 290 | 1.8 |
| 2020 | 6 | 16 | 7  | 19.4 | 103 | 457 | 247  | 995 | 21   | 298 | 2.5 |
| 2020 | 6 | 16 | 8  | 19.1 | 131 | 638 | 453  | 995 | 22.7 | 302 | 2.5 |
| 2020 | 6 | 16 | 9  | 18.7 | 146 | 741 | 648  | 995 | 24.1 | 298 | 2.4 |
| 2020 | 6 | 16 | 10 | 18.6 | 159 | 798 | 811  | 995 | 25.4 | 296 | 2.5 |
| 2020 | 6 | 16 | 11 | 18.8 | 340 | 556 | 849  | 994 | 26.4 | 305 | 2.5 |
| 2020 | 6 | 16 | 12 | 18.7 | 393 | 521 | 899  | 994 | 27.2 | 318 | 2.3 |
| 2020 | 6 | 16 | 13 | 18.3 | 165 | 852 | 995  | 993 | 27.7 | 316 | 2.3 |



|      |   |    |    |      |     |     |     |     |      |     |     |
|------|---|----|----|------|-----|-----|-----|-----|------|-----|-----|
| 2020 | 6 | 16 | 14 | 17.9 | 162 | 835 | 936 | 993 | 26.9 | 308 | 2.3 |
| 2020 | 6 | 16 | 15 | 18.2 | 162 | 790 | 818 | 993 | 26.2 | 303 | 1.8 |
| 2020 | 6 | 16 | 16 | 17.8 | 144 | 746 | 662 | 993 | 26.1 | 307 | 2.2 |
| 2020 | 6 | 16 | 17 | 17.8 | 202 | 331 | 376 | 993 | 25   | 314 | 1.6 |
| 2020 | 6 | 16 | 18 | 19.3 | 92  | 524 | 269 | 993 | 23.1 | 311 | 1.1 |
| 2020 | 6 | 16 | 19 | 18.7 | 47  | 169 | 71  | 994 | 21   | 316 | 0.9 |
| 2020 | 6 | 16 | 20 | 17.9 | 0   | 0   | 0   | 993 | 20.1 | 334 | 0.8 |
| 2020 | 6 | 16 | 21 | 17.5 | 0   | 0   | 0   | 993 | 19.6 | 355 | 0.8 |
| 2020 | 6 | 16 | 22 | 16.9 | 0   | 0   | 0   | 994 | 19.7 | 15  | 0.8 |
| 2020 | 6 | 16 | 23 | 16.2 | 0   | 0   | 0   | 994 | 20.1 | 76  | 0.5 |
| 2020 | 6 | 17 | 0  | 16.3 | 0   | 0   | 0   | 994 | 19.4 | 129 | 0.7 |
| 2020 | 6 | 17 | 1  | 16.5 | 0   | 0   | 0   | 994 | 18.3 | 135 | 0.8 |
| 2020 | 6 | 17 | 2  | 16.7 | 0   | 0   | 0   | 994 | 17.7 | 138 | 0.9 |
| 2020 | 6 | 17 | 3  | 17   | 0   | 0   | 0   | 994 | 17.2 | 135 | 0.9 |
| 2020 | 6 | 17 | 4  | 16.7 | 0   | 0   | 0   | 994 | 16.7 | 126 | 1   |
| 2020 | 6 | 17 | 5  | 16.5 | 0   | 0   | 0   | 994 | 16.5 | 125 | 1.1 |
| 2020 | 6 | 17 | 6  | 17.7 | 38  | 198 | 62  | 994 | 17.9 | 127 | 1.3 |
| 2020 | 6 | 17 | 7  | 18.4 | 95  | 395 | 219 | 994 | 19.4 | 128 | 2.2 |
| 2020 | 6 | 17 | 8  | 18.6 | 212 | 196 | 310 | 994 | 20.6 | 136 | 2.2 |
| 2020 | 6 | 17 | 9  | 18.7 | 305 | 217 | 452 | 994 | 21.8 | 149 | 2.2 |
| 2020 | 6 | 17 | 10 | 18.6 | 289 | 21  | 306 | 994 | 23.5 | 162 | 2   |
| 2020 | 6 | 17 | 11 | 18.2 | 418 | 343 | 733 | 994 | 24.9 | 173 | 2.2 |
| 2020 | 6 | 17 | 12 | 17.9 | 490 | 146 | 632 | 993 | 24.5 | 185 | 2.5 |
| 2020 | 6 | 17 | 13 | 18.3 | 470 | 298 | 760 | 993 | 24.3 | 199 | 2.9 |
| 2020 | 6 | 17 | 14 | 18.8 | 358 | 28  | 384 | 993 | 24.7 | 215 | 3.2 |
| 2020 | 6 | 17 | 15 | 18.9 | 339 | 37  | 370 | 993 | 24.5 | 233 | 3.2 |
| 2020 | 6 | 17 | 16 | 18.8 | 320 | 134 | 413 | 993 | 23.1 | 255 | 3.1 |
| 2020 | 6 | 17 | 17 | 19.1 | 141 | 0   | 141 | 994 | 21.5 | 267 | 3.2 |
| 2020 | 6 | 17 | 18 | 18.9 | 56  | 0   | 56  | 994 | 20.1 | 267 | 2.8 |
| 2020 | 6 | 17 | 19 | 18.7 | 44  | 0   | 44  | 995 | 19.2 | 268 | 1.7 |
| 2020 | 6 | 17 | 20 | 18.4 | 0   | 0   | 0   | 995 | 18.7 | 278 | 0.9 |
| 2020 | 6 | 17 | 21 | 18.1 | 0   | 0   | 0   | 995 | 18.3 | 301 | 0.6 |
| 2020 | 6 | 17 | 22 | 17.9 | 0   | 0   | 0   | 995 | 18.1 | 327 | 0.5 |
| 2020 | 6 | 17 | 23 | 17.8 | 0   | 0   | 0   | 994 | 17.9 | 11  | 0.4 |
| 2020 | 6 | 18 | 0  | 17.8 | 0   | 0   | 0   | 993 | 17.9 | 43  | 0.5 |
| 2020 | 6 | 18 | 1  | 17.8 | 0   | 0   | 0   | 992 | 17.9 | 45  | 0.6 |
| 2020 | 6 | 18 | 2  | 17.8 | 0   | 0   | 0   | 992 | 18   | 55  | 0.9 |
| 2020 | 6 | 18 | 3  | 17.8 | 0   | 0   | 0   | 991 | 18   | 70  | 1.5 |
| 2020 | 6 | 18 | 4  | 17.7 | 0   | 0   | 0   | 991 | 17.9 | 71  | 1.4 |
| 2020 | 6 | 18 | 5  | 17.5 | 0   | 0   | 0   | 990 | 17.8 | 78  | 2.3 |
| 2020 | 6 | 18 | 6  | 17.7 | 19  | 0   | 19  | 991 | 18.3 | 79  | 1.9 |
| 2020 | 6 | 18 | 7  | 17.6 | 57  | 0   | 57  | 992 | 18.3 | 62  | 2.1 |
| 2020 | 6 | 18 | 8  | 17.4 | 55  | 0   | 55  | 991 | 18.4 | 61  | 2.7 |
| 2020 | 6 | 18 | 9  | 17.4 | 137 | 0   | 137 | 990 | 18.5 | 73  | 3.5 |
| 2020 | 6 | 18 | 10 | 17.3 | 209 | 9   | 216 | 989 | 18.8 | 77  | 3.9 |
| 2020 | 6 | 18 | 11 | 17.4 | 136 | 1   | 137 | 990 | 19.4 | 43  | 2.7 |
| 2020 | 6 | 18 | 12 | 17.5 | 179 | 8   | 187 | 989 | 19.9 | 63  | 3.2 |
| 2020 | 6 | 18 | 13 | 17.9 | 208 | 11  | 218 | 989 | 20.4 | 77  | 3   |
| 2020 | 6 | 18 | 14 | 18.2 | 249 | 13  | 261 | 988 | 20.7 | 79  | 2.8 |
| 2020 | 6 | 18 | 15 | 18.6 | 250 | 13  | 261 | 988 | 21.1 | 78  | 2.8 |

|      |   |    |    |      |     |     |     |      |      |     |     |
|------|---|----|----|------|-----|-----|-----|------|------|-----|-----|
| 2020 | 6 | 18 | 16 | 18.7 | 172 | 4   | 175 | 988  | 21   | 88  | 3.1 |
| 2020 | 6 | 18 | 17 | 18.9 | 27  | 0   | 27  | 988  | 20.6 | 98  | 2.6 |
| 2020 | 6 | 18 | 18 | 19   | 31  | 0   | 31  | 988  | 19.9 | 94  | 1.9 |
| 2020 | 6 | 18 | 19 | 19   | 36  | 0   | 36  | 989  | 19.2 | 75  | 0.9 |
| 2020 | 6 | 18 | 20 | 18.6 | 0   | 0   | 0   | 989  | 18.7 | 50  | 0.8 |
| 2020 | 6 | 18 | 21 | 18.3 | 0   | 0   | 0   | 990  | 18.5 | 38  | 1.3 |
| 2020 | 6 | 18 | 22 | 17.9 | 0   | 0   | 0   | 990  | 18.2 | 36  | 1.9 |
| 2020 | 6 | 18 | 23 | 17.4 | 0   | 0   | 0   | 990  | 17.8 | 37  | 2   |
| 2020 | 6 | 19 | 0  | 17   | 0   | 0   | 0   | 989  | 17.3 | 39  | 1.7 |
| 2020 | 6 | 19 | 1  | 16.7 | 0   | 0   | 0   | 989  | 17   | 41  | 1.4 |
| 2020 | 6 | 19 | 2  | 16.4 | 0   | 0   | 0   | 989  | 16.8 | 42  | 1.1 |
| 2020 | 6 | 19 | 3  | 16.3 | 0   | 0   | 0   | 990  | 16.6 | 31  | 0.9 |
| 2020 | 6 | 19 | 4  | 16.1 | 0   | 0   | 0   | 991  | 16.4 | 18  | 1   |
| 2020 | 6 | 19 | 5  | 15.9 | 0   | 0   | 0   | 992  | 16.3 | 12  | 1.3 |
| 2020 | 6 | 19 | 6  | 16.1 | 27  | 0   | 27  | 993  | 16.7 | 11  | 2   |
| 2020 | 6 | 19 | 7  | 16.5 | 116 | 46  | 131 | 993  | 17.3 | 16  | 2.2 |
| 2020 | 6 | 19 | 8  | 17   | 190 | 33  | 207 | 993  | 19   | 25  | 2.1 |
| 2020 | 6 | 19 | 9  | 17.1 | 309 | 152 | 411 | 993  | 21.7 | 29  | 2.3 |
| 2020 | 6 | 19 | 10 | 17   | 392 | 187 | 544 | 993  | 24.1 | 22  | 2.3 |
| 2020 | 6 | 19 | 11 | 17.3 | 148 | 837 | 916 | 993  | 25.4 | 9   | 2.3 |
| 2020 | 6 | 19 | 12 | 17.6 | 140 | 870 | 985 | 993  | 26.3 | 356 | 2.1 |
| 2020 | 6 | 19 | 13 | 17.8 | 149 | 857 | 984 | 994  | 26.8 | 338 | 2.1 |
| 2020 | 6 | 19 | 14 | 18   | 156 | 826 | 922 | 994  | 26.9 | 325 | 2.3 |
| 2020 | 6 | 19 | 15 | 18.3 | 315 | 467 | 704 | 994  | 26.7 | 320 | 2.6 |
| 2020 | 6 | 19 | 16 | 18.6 | 289 | 347 | 530 | 995  | 26   | 316 | 2.6 |
| 2020 | 6 | 19 | 17 | 19.1 | 219 | 242 | 347 | 995  | 24.7 | 314 | 2.2 |
| 2020 | 6 | 19 | 18 | 19.4 | 123 | 386 | 254 | 996  | 22.8 | 316 | 2.1 |
| 2020 | 6 | 19 | 19 | 19   | 57  | 147 | 78  | 996  | 20.7 | 319 | 1.8 |
| 2020 | 6 | 19 | 20 | 18.5 | 0   | 0   | 0   | 997  | 19.4 | 326 | 1.6 |
| 2020 | 6 | 19 | 21 | 18.2 | 0   | 0   | 0   | 997  | 18.8 | 334 | 1.3 |
| 2020 | 6 | 19 | 22 | 18   | 0   | 0   | 0   | 998  | 18.3 | 341 | 0.9 |
| 2020 | 6 | 19 | 23 | 17.8 | 0   | 0   | 0   | 998  | 18   | 348 | 0.8 |
| 2020 | 6 | 20 | 0  | 17.7 | 0   | 0   | 0   | 998  | 17.7 | 4   | 0.8 |
| 2020 | 6 | 20 | 1  | 17.6 | 0   | 0   | 0   | 998  | 17.6 | 28  | 0.8 |
| 2020 | 6 | 20 | 2  | 17.4 | 0   | 0   | 0   | 998  | 17.4 | 54  | 0.8 |
| 2020 | 6 | 20 | 3  | 17.3 | 0   | 0   | 0   | 998  | 17.3 | 78  | 0.9 |
| 2020 | 6 | 20 | 4  | 17.3 | 0   | 0   | 0   | 998  | 17.3 | 99  | 1   |
| 2020 | 6 | 20 | 5  | 17.7 | 0   | 0   | 0   | 999  | 17.7 | 115 | 1.2 |
| 2020 | 6 | 20 | 6  | 18.5 | 10  | 0   | 10  | 1000 | 19.2 | 126 | 2.1 |
| 2020 | 6 | 20 | 7  | 18.6 | 40  | 0   | 40  | 1000 | 20.4 | 137 | 2.7 |
| 2020 | 6 | 20 | 8  | 18.9 | 96  | 0   | 96  | 1000 | 21.9 | 145 | 2.8 |
| 2020 | 6 | 20 | 9  | 19.4 | 270 | 372 | 520 | 1000 | 23.4 | 145 | 2.4 |
| 2020 | 6 | 20 | 10 | 19.9 | 227 | 655 | 762 | 999  | 24.6 | 144 | 1.9 |
| 2020 | 6 | 20 | 11 | 20.1 | 230 | 710 | 881 | 999  | 25.4 | 144 | 1.7 |
| 2020 | 6 | 20 | 12 | 20.3 | 405 | 36  | 441 | 999  | 26.1 | 147 | 1.6 |
| 2020 | 6 | 20 | 13 | 20.4 | 493 | 159 | 648 | 998  | 26.5 | 155 | 1.5 |
| 2020 | 6 | 20 | 14 | 20.5 | 236 | 706 | 892 | 998  | 26.9 | 166 | 1.6 |
| 2020 | 6 | 20 | 15 | 20.4 | 384 | 289 | 625 | 997  | 26.8 | 175 | 1.6 |
| 2020 | 6 | 20 | 16 | 20.3 | 293 | 330 | 524 | 997  | 26.2 | 186 | 1.4 |
| 2020 | 6 | 20 | 17 | 20.5 | 218 | 248 | 349 | 997  | 25.4 | 205 | 1.1 |

|      |   |    |    |      |     |     |     |     |      |     |     |
|------|---|----|----|------|-----|-----|-----|-----|------|-----|-----|
| 2020 | 6 | 20 | 18 | 20.7 | 149 | 279 | 244 | 997 | 24.4 | 219 | 0.7 |
| 2020 | 6 | 20 | 19 | 20.9 | 50  | 80  | 62  | 997 | 22.8 | 229 | 0.4 |
| 2020 | 6 | 20 | 20 | 19.9 | 0   | 0   | 0   | 997 | 21.5 | 245 | 0.3 |
| 2020 | 6 | 20 | 21 | 19.3 | 0   | 0   | 0   | 998 | 20.8 | 252 | 0.3 |
| 2020 | 6 | 20 | 22 | 18.8 | 0   | 0   | 0   | 998 | 20.5 | 199 | 0.2 |
| 2020 | 6 | 20 | 23 | 18.6 | 0   | 0   | 0   | 997 | 19.8 | 136 | 0.5 |
| 2020 | 6 | 21 | 0  | 18.4 | 0   | 0   | 0   | 997 | 18.9 | 122 | 0.7 |
| 2020 | 6 | 21 | 1  | 18.2 | 0   | 0   | 0   | 997 | 18.2 | 115 | 0.7 |
| 2020 | 6 | 21 | 2  | 17.6 | 0   | 0   | 0   | 997 | 17.6 | 107 | 0.7 |
| 2020 | 6 | 21 | 3  | 17.3 | 0   | 0   | 0   | 997 | 17.3 | 95  | 0.8 |
| 2020 | 6 | 21 | 4  | 17   | 0   | 0   | 0   | 997 | 17   | 81  | 0.8 |
| 2020 | 6 | 21 | 5  | 17   | 0   | 0   | 0   | 997 | 17   | 66  | 0.8 |
| 2020 | 6 | 21 | 6  | 17.5 | 47  | 125 | 62  | 997 | 18.6 | 53  | 1.7 |
| 2020 | 6 | 21 | 7  | 17.9 | 118 | 164 | 170 | 997 | 20.7 | 41  | 1.9 |
| 2020 | 6 | 21 | 8  | 18.7 | 143 | 583 | 436 | 997 | 22.8 | 39  | 2.2 |
| 2020 | 6 | 21 | 9  | 19.4 | 163 | 687 | 626 | 996 | 24.7 | 47  | 2.3 |
| 2020 | 6 | 21 | 10 | 19.8 | 175 | 754 | 789 | 996 | 26.2 | 60  | 2.3 |
| 2020 | 6 | 21 | 11 | 19.9 | 177 | 800 | 910 | 995 | 27.4 | 74  | 2.5 |
| 2020 | 6 | 21 | 12 | 19.9 | 162 | 844 | 981 | 995 | 28.1 | 86  | 2.6 |
| 2020 | 6 | 21 | 13 | 19.9 | 158 | 848 | 985 | 994 | 28.4 | 96  | 2.6 |
| 2020 | 6 | 21 | 14 | 19.9 | 451 | 98  | 541 | 994 | 28.4 | 104 | 2.5 |
| 2020 | 6 | 21 | 15 | 19.8 | 391 | 263 | 610 | 994 | 28.1 | 112 | 2.4 |
| 2020 | 6 | 21 | 16 | 19.8 | 304 | 291 | 506 | 994 | 27.6 | 120 | 2.1 |
| 2020 | 6 | 21 | 17 | 20   | 225 | 197 | 329 | 994 | 26.8 | 133 | 1.7 |
| 2020 | 6 | 21 | 18 | 20   | 71  | 0   | 71  | 994 | 25.7 | 150 | 1.4 |
| 2020 | 6 | 21 | 19 | 20.1 | 5   | 0   | 5   | 995 | 22.7 | 171 | 0.9 |
| 2020 | 6 | 21 | 20 | 19.1 | 0   | 0   | 0   | 995 | 20.6 | 196 | 0.9 |
| 2020 | 6 | 21 | 21 | 18.7 | 0   | 0   | 0   | 996 | 19.7 | 216 | 0.9 |
| 2020 | 6 | 21 | 22 | 18.3 | 0   | 0   | 0   | 996 | 19   | 229 | 0.9 |
| 2020 | 6 | 21 | 23 | 18.1 | 0   | 0   | 0   | 996 | 18.5 | 232 | 0.7 |
| 2020 | 6 | 22 | 0  | 17.8 | 0   | 0   | 0   | 996 | 18.4 | 220 | 0.5 |
| 2020 | 6 | 22 | 1  | 17.6 | 0   | 0   | 0   | 996 | 17.9 | 171 | 0.4 |
| 2020 | 6 | 22 | 2  | 17.2 | 0   | 0   | 0   | 995 | 17.2 | 134 | 0.6 |
| 2020 | 6 | 22 | 3  | 16.6 | 0   | 0   | 0   | 995 | 16.6 | 124 | 0.8 |
| 2020 | 6 | 22 | 4  | 16.3 | 0   | 0   | 0   | 996 | 16.3 | 118 | 0.8 |
| 2020 | 6 | 22 | 5  | 16.1 | 0   | 0   | 0   | 996 | 16.1 | 116 | 0.8 |
| 2020 | 6 | 22 | 6  | 17.4 | 40  | 246 | 69  | 997 | 18.2 | 115 | 1.2 |
| 2020 | 6 | 22 | 7  | 17.6 | 79  | 549 | 251 | 997 | 20.3 | 112 | 1.2 |
| 2020 | 6 | 22 | 8  | 17.4 | 103 | 703 | 456 | 997 | 22.5 | 98  | 1.1 |
| 2020 | 6 | 22 | 9  | 17.4 | 119 | 788 | 650 | 997 | 24.3 | 85  | 1.4 |
| 2020 | 6 | 22 | 10 | 17.7 | 131 | 836 | 812 | 997 | 25.8 | 85  | 1.5 |
| 2020 | 6 | 22 | 11 | 18   | 137 | 866 | 931 | 997 | 27   | 97  | 1.7 |
| 2020 | 6 | 22 | 12 | 18.4 | 155 | 861 | 992 | 997 | 28   | 111 | 2   |
| 2020 | 6 | 22 | 13 | 18.6 | 153 | 866 | 998 | 996 | 28.5 | 120 | 2.2 |
| 2020 | 6 | 22 | 14 | 18.7 | 147 | 858 | 943 | 996 | 28.6 | 127 | 2.4 |
| 2020 | 6 | 22 | 15 | 18.8 | 144 | 826 | 832 | 995 | 28.3 | 132 | 2.5 |
| 2020 | 6 | 22 | 16 | 19   | 131 | 780 | 675 | 995 | 27.8 | 138 | 2.3 |
| 2020 | 6 | 22 | 17 | 19.4 | 113 | 702 | 485 | 995 | 27.1 | 148 | 2   |
| 2020 | 6 | 22 | 18 | 19.2 | 88  | 563 | 281 | 996 | 25.5 | 156 | 1.7 |
| 2020 | 6 | 22 | 19 | 19.6 | 49  | 300 | 93  | 997 | 21.9 | 168 | 1.1 |

|      |   |    |    |      |     |     |     |     |      |     |     |
|------|---|----|----|------|-----|-----|-----|-----|------|-----|-----|
| 2020 | 6 | 22 | 20 | 18.3 | 0   | 0   | 0   | 997 | 19.9 | 176 | 1   |
| 2020 | 6 | 22 | 21 | 17.8 | 0   | 0   | 0   | 998 | 19.1 | 180 | 0.9 |
| 2020 | 6 | 22 | 22 | 17.6 | 0   | 0   | 0   | 998 | 18.7 | 189 | 0.8 |
| 2020 | 6 | 22 | 23 | 17.3 | 0   | 0   | 0   | 998 | 18.7 | 206 | 0.6 |
| 2020 | 6 | 23 | 0  | 17   | 0   | 0   | 0   | 998 | 18.6 | 220 | 0.3 |
| 2020 | 6 | 23 | 1  | 16.8 | 0   | 0   | 0   | 998 | 18.3 | 96  | 0.3 |
| 2020 | 6 | 23 | 2  | 16.6 | 0   | 0   | 0   | 997 | 17.5 | 89  | 0.7 |
| 2020 | 6 | 23 | 3  | 16.3 | 0   | 0   | 0   | 997 | 16.8 | 89  | 0.9 |
| 2020 | 6 | 23 | 4  | 16.1 | 0   | 0   | 0   | 997 | 16.4 | 87  | 0.9 |
| 2020 | 6 | 23 | 5  | 15.9 | 0   | 0   | 0   | 997 | 16.4 | 86  | 0.9 |
| 2020 | 6 | 23 | 6  | 16.9 | 39  | 269 | 71  | 998 | 18.2 | 88  | 1.2 |
| 2020 | 6 | 23 | 7  | 17.1 | 77  | 572 | 255 | 998 | 19.9 | 94  | 2   |
| 2020 | 6 | 23 | 8  | 17.8 | 98  | 724 | 461 | 997 | 22.2 | 106 | 2   |
| 2020 | 6 | 23 | 9  | 17.9 | 166 | 655 | 607 | 997 | 24.4 | 123 | 2.4 |
| 2020 | 6 | 23 | 10 | 18.3 | 123 | 856 | 820 | 997 | 25.8 | 145 | 2.8 |
| 2020 | 6 | 23 | 11 | 18.7 | 130 | 881 | 937 | 998 | 26.9 | 160 | 2.9 |
| 2020 | 6 | 23 | 12 | 18.9 | 409 | 483 | 878 | 997 | 27.5 | 151 | 3.1 |
| 2020 | 6 | 23 | 13 | 19   | 408 | 495 | 890 | 996 | 27.7 | 152 | 3.1 |
| 2020 | 6 | 23 | 14 | 19.2 | 382 | 441 | 792 | 996 | 27.3 | 153 | 2.8 |
| 2020 | 6 | 23 | 15 | 19.7 | 130 | 839 | 829 | 996 | 26.6 | 153 | 2.2 |
| 2020 | 6 | 23 | 16 | 19.7 | 278 | 393 | 553 | 996 | 26.1 | 153 | 1.9 |
| 2020 | 6 | 23 | 17 | 19.6 | 207 | 42  | 229 | 996 | 25.1 | 153 | 1.8 |
| 2020 | 6 | 23 | 18 | 20.4 | 91  | 0   | 91  | 996 | 23.5 | 149 | 1.3 |
| 2020 | 6 | 23 | 19 | 19.4 | 34  | 0   | 34  | 996 | 21.6 | 141 | 1.2 |
| 2020 | 6 | 23 | 20 | 18.6 | 0   | 0   | 0   | 996 | 20.6 | 133 | 1.4 |
| 2020 | 6 | 23 | 21 | 18   | 0   | 0   | 0   | 996 | 20.2 | 125 | 1.8 |
| 2020 | 6 | 23 | 22 | 17.6 | 0   | 0   | 0   | 995 | 19.9 | 119 | 2.4 |
| 2020 | 6 | 23 | 23 | 17.5 | 0   | 0   | 0   | 995 | 19.7 | 118 | 2.9 |
| 2020 | 6 | 24 | 0  | 17.6 | 0   | 0   | 0   | 995 | 19.3 | 119 | 2.9 |
| 2020 | 6 | 24 | 1  | 17.7 | 0   | 0   | 0   | 994 | 19.1 | 121 | 3.3 |
| 2020 | 6 | 24 | 2  | 18   | 0   | 0   | 0   | 994 | 19   | 122 | 3.6 |
| 2020 | 6 | 24 | 3  | 18.3 | 0   | 0   | 0   | 994 | 19.1 | 123 | 3.7 |
| 2020 | 6 | 24 | 4  | 18.7 | 0   | 0   | 0   | 994 | 19.4 | 125 | 3.9 |
| 2020 | 6 | 24 | 5  | 19   | 0   | 0   | 0   | 994 | 19.7 | 127 | 4   |
| 2020 | 6 | 24 | 6  | 19.5 | 37  | 18  | 40  | 994 | 20.3 | 126 | 4.2 |
| 2020 | 6 | 24 | 7  | 20.1 | 49  | 0   | 49  | 993 | 21.2 | 125 | 4.4 |
| 2020 | 6 | 24 | 8  | 21   | 209 | 91  | 254 | 993 | 22.7 | 129 | 5   |
| 2020 | 6 | 24 | 9  | 21.7 | 149 | 0   | 149 | 992 | 24.3 | 139 | 6   |
| 2020 | 6 | 24 | 10 | 21.7 | 392 | 158 | 520 | 992 | 24.9 | 145 | 6.9 |
| 2020 | 6 | 24 | 11 | 21.7 | 236 | 12  | 247 | 991 | 24.6 | 147 | 7.1 |
| 2020 | 6 | 24 | 12 | 21.9 | 289 | 16  | 304 | 991 | 24.1 | 148 | 6.9 |
| 2020 | 6 | 24 | 13 | 22.1 | 116 | 0   | 116 | 990 | 23.7 | 149 | 6.6 |
| 2020 | 6 | 24 | 14 | 22.4 | 133 | 1   | 133 | 990 | 23.7 | 150 | 6.2 |
| 2020 | 6 | 24 | 15 | 22.8 | 122 | 0   | 122 | 989 | 24.1 | 152 | 5.9 |
| 2020 | 6 | 24 | 16 | 23   | 62  | 0   | 62  | 989 | 24   | 156 | 5.2 |
| 2020 | 6 | 24 | 17 | 23.2 | 38  | 0   | 38  | 989 | 23.7 | 163 | 4.2 |
| 2020 | 6 | 24 | 18 | 23.2 | 99  | 0   | 99  | 989 | 23.5 | 172 | 3.1 |
| 2020 | 6 | 24 | 19 | 22.9 | 32  | 0   | 32  | 989 | 23   | 184 | 2   |
| 2020 | 6 | 24 | 20 | 22.2 | 0   | 0   | 0   | 990 | 22.2 | 203 | 1.5 |
| 2020 | 6 | 24 | 21 | 21.8 | 0   | 0   | 0   | 990 | 21.8 | 210 | 1.3 |

|      |   |    |    |      |     |     |     |     |      |     |     |
|------|---|----|----|------|-----|-----|-----|-----|------|-----|-----|
| 2020 | 6 | 24 | 22 | 21.4 | 0   | 0   | 0   | 990 | 21.4 | 214 | 1.2 |
| 2020 | 6 | 24 | 23 | 21   | 0   | 0   | 0   | 990 | 21   | 209 | 1.1 |
| 2020 | 6 | 25 | 0  | 20.9 | 0   | 0   | 0   | 990 | 20.9 | 209 | 1.2 |
| 2020 | 6 | 25 | 1  | 20.9 | 0   | 0   | 0   | 990 | 20.9 | 217 | 1.4 |
| 2020 | 6 | 25 | 2  | 20.8 | 0   | 0   | 0   | 990 | 20.8 | 226 | 1.4 |
| 2020 | 6 | 25 | 3  | 20.5 | 0   | 0   | 0   | 990 | 20.5 | 230 | 1.3 |
| 2020 | 6 | 25 | 4  | 20.3 | 0   | 0   | 0   | 990 | 20.3 | 231 | 1.3 |
| 2020 | 6 | 25 | 5  | 20.3 | 0   | 0   | 0   | 990 | 20.3 | 230 | 1.3 |
| 2020 | 6 | 25 | 6  | 21   | 13  | 0   | 13  | 991 | 21.2 | 226 | 2   |
| 2020 | 6 | 25 | 7  | 21.1 | 24  | 0   | 24  | 991 | 21.6 | 224 | 2.2 |
| 2020 | 6 | 25 | 8  | 21.1 | 130 | 0   | 130 | 991 | 21.9 | 226 | 2.3 |
| 2020 | 6 | 25 | 9  | 21.1 | 151 | 0   | 151 | 991 | 22.2 | 227 | 2.1 |
| 2020 | 6 | 25 | 10 | 21.2 | 86  | 0   | 86  | 991 | 22.8 | 225 | 2.2 |
| 2020 | 6 | 25 | 11 | 21.2 | 156 | 5   | 160 | 991 | 23.4 | 226 | 2.7 |
| 2020 | 6 | 25 | 12 | 21.2 | 77  | 0   | 77  | 991 | 23.8 | 231 | 3   |
| 2020 | 6 | 25 | 13 | 21.2 | 140 | 2   | 142 | 990 | 23.8 | 235 | 2.9 |
| 2020 | 6 | 25 | 14 | 21.2 | 154 | 5   | 158 | 990 | 24.1 | 238 | 2.9 |
| 2020 | 6 | 25 | 15 | 21.4 | 200 | 8   | 207 | 990 | 24.6 | 243 | 3.4 |
| 2020 | 6 | 25 | 16 | 21   | 322 | 140 | 420 | 990 | 24.2 | 249 | 3.6 |
| 2020 | 6 | 25 | 17 | 20.5 | 229 | 146 | 307 | 991 | 23.3 | 256 | 3.4 |
| 2020 | 6 | 25 | 18 | 20.1 | 13  | 0   | 13  | 991 | 22.1 | 260 | 2.7 |
| 2020 | 6 | 25 | 19 | 19.7 | 50  | 43  | 57  | 992 | 20.7 | 264 | 1.6 |
| 2020 | 6 | 25 | 20 | 19.2 | 0   | 0   | 0   | 992 | 19.6 | 266 | 1.2 |
| 2020 | 6 | 25 | 21 | 18.9 | 0   | 0   | 0   | 993 | 19   | 267 | 1.1 |
| 2020 | 6 | 25 | 22 | 18.6 | 0   | 0   | 0   | 993 | 18.6 | 266 | 1   |
| 2020 | 6 | 25 | 23 | 18.4 | 0   | 0   | 0   | 993 | 18.4 | 263 | 0.9 |
| 2020 | 6 | 26 | 0  | 18.2 | 0   | 0   | 0   | 993 | 18.2 | 259 | 1   |
| 2020 | 6 | 26 | 1  | 18.2 | 0   | 0   | 0   | 993 | 18.2 | 260 | 1.2 |
| 2020 | 6 | 26 | 2  | 18.2 | 0   | 0   | 0   | 993 | 18.2 | 262 | 1.5 |
| 2020 | 6 | 26 | 3  | 17.8 | 0   | 0   | 0   | 994 | 17.8 | 267 | 1.5 |
| 2020 | 6 | 26 | 4  | 17.6 | 0   | 0   | 0   | 994 | 17.6 | 273 | 1.6 |
| 2020 | 6 | 26 | 5  | 17.7 | 0   | 0   | 0   | 995 | 17.7 | 278 | 1.6 |
| 2020 | 6 | 26 | 6  | 18.6 | 12  | 0   | 12  | 995 | 19.3 | 283 | 2.5 |
| 2020 | 6 | 26 | 7  | 18.5 | 38  | 0   | 38  | 996 | 20.5 | 291 | 2.9 |
| 2020 | 6 | 26 | 8  | 18.5 | 148 | 1   | 149 | 996 | 21.7 | 296 | 2.8 |
| 2020 | 6 | 26 | 9  | 19   | 299 | 95  | 363 | 996 | 23.1 | 296 | 2.3 |
| 2020 | 6 | 26 | 10 | 19.7 | 180 | 741 | 782 | 995 | 24.5 | 292 | 1.9 |
| 2020 | 6 | 26 | 11 | 20.3 | 194 | 769 | 898 | 995 | 25.6 | 282 | 1.7 |
| 2020 | 6 | 26 | 12 | 20.7 | 153 | 848 | 976 | 995 | 26.5 | 281 | 1.8 |
| 2020 | 6 | 26 | 13 | 20.9 | 161 | 836 | 977 | 994 | 27.1 | 281 | 2   |
| 2020 | 6 | 26 | 14 | 20.9 | 169 | 804 | 916 | 995 | 27.3 | 279 | 2.3 |
| 2020 | 6 | 26 | 15 | 20.9 | 186 | 730 | 795 | 995 | 27   | 275 | 2.4 |
| 2020 | 6 | 26 | 16 | 20.6 | 178 | 656 | 638 | 995 | 26.4 | 272 | 2.3 |
| 2020 | 6 | 26 | 17 | 20.4 | 158 | 548 | 450 | 995 | 25.5 | 273 | 2.2 |
| 2020 | 6 | 26 | 18 | 20.5 | 123 | 388 | 256 | 995 | 24.1 | 277 | 1.5 |
| 2020 | 6 | 26 | 19 | 20.3 | 59  | 153 | 81  | 995 | 22.1 | 281 | 0.9 |
| 2020 | 6 | 26 | 20 | 19.5 | 0   | 0   | 0   | 995 | 20.9 | 289 | 0.7 |
| 2020 | 6 | 26 | 21 | 18.9 | 0   | 0   | 0   | 996 | 20.5 | 294 | 0.6 |
| 2020 | 6 | 26 | 22 | 18.3 | 0   | 0   | 0   | 996 | 20.3 | 310 | 0.5 |
| 2020 | 6 | 26 | 23 | 17.9 | 0   | 0   | 0   | 996 | 20.1 | 348 | 0.5 |

|      |   |    |    |      |     |     |     |     |      |     |     |
|------|---|----|----|------|-----|-----|-----|-----|------|-----|-----|
| 2020 | 6 | 27 | 0  | 17.7 | 0   | 0   | 0   | 996 | 19.4 | 24  | 0.7 |
| 2020 | 6 | 27 | 1  | 17.4 | 0   | 0   | 0   | 995 | 18.9 | 39  | 0.8 |
| 2020 | 6 | 27 | 2  | 17.2 | 0   | 0   | 0   | 995 | 18.4 | 48  | 0.8 |
| 2020 | 6 | 27 | 3  | 17   | 0   | 0   | 0   | 994 | 18.2 | 57  | 0.9 |
| 2020 | 6 | 27 | 4  | 16.8 | 0   | 0   | 0   | 994 | 18   | 64  | 0.9 |
| 2020 | 6 | 27 | 5  | 16.8 | 0   | 0   | 0   | 994 | 17.9 | 70  | 0.9 |
| 2020 | 6 | 27 | 6  | 18   | 32  | 0   | 32  | 994 | 19.1 | 76  | 0.8 |
| 2020 | 6 | 27 | 7  | 18.3 | 112 | 39  | 124 | 994 | 20.8 | 83  | 1.3 |
| 2020 | 6 | 27 | 8  | 18.4 | 139 | 531 | 403 | 994 | 21.8 | 91  | 1.3 |
| 2020 | 6 | 27 | 9  | 18.9 | 300 | 100 | 367 | 994 | 23   | 91  | 1.1 |
| 2020 | 6 | 27 | 10 | 18.8 | 390 | 167 | 526 | 994 | 24.6 | 97  | 0.8 |
| 2020 | 6 | 27 | 11 | 19   | 453 | 145 | 586 | 994 | 25.6 | 122 | 1.2 |
| 2020 | 6 | 27 | 12 | 19.4 | 488 | 138 | 622 | 993 | 26.2 | 132 | 1.8 |
| 2020 | 6 | 27 | 13 | 19.6 | 419 | 423 | 831 | 993 | 27.1 | 140 | 2   |
| 2020 | 6 | 27 | 14 | 19.7 | 361 | 526 | 850 | 993 | 27.5 | 146 | 1.7 |
| 2020 | 6 | 27 | 15 | 19.3 | 344 | 399 | 677 | 992 | 27.9 | 143 | 1.2 |
| 2020 | 6 | 27 | 16 | 18.1 | 295 | 333 | 528 | 992 | 27.8 | 145 | 1.1 |
| 2020 | 6 | 27 | 17 | 17.2 | 178 | 515 | 453 | 991 | 27.4 | 151 | 0.8 |
| 2020 | 6 | 27 | 18 | 20.1 | 108 | 0   | 108 | 991 | 26.2 | 158 | 0.5 |
| 2020 | 6 | 27 | 19 | 18.5 | 59  | 155 | 82  | 991 | 24.7 | 202 | 0.5 |
| 2020 | 6 | 27 | 20 | 17.4 | 0   | 0   | 0   | 992 | 23.2 | 231 | 0.5 |
| 2020 | 6 | 27 | 21 | 17.3 | 0   | 0   | 0   | 992 | 22.1 | 273 | 0.6 |
| 2020 | 6 | 27 | 22 | 17.6 | 0   | 0   | 0   | 993 | 20.8 | 304 | 0.8 |
| 2020 | 6 | 27 | 23 | 17.3 | 0   | 0   | 0   | 992 | 19.7 | 328 | 0.9 |
| 2020 | 6 | 28 | 0  | 17   | 0   | 0   | 0   | 992 | 18.8 | 341 | 0.9 |
| 2020 | 6 | 28 | 1  | 16.6 | 0   | 0   | 0   | 992 | 18.1 | 348 | 1   |
| 2020 | 6 | 28 | 2  | 16.2 | 0   | 0   | 0   | 992 | 17.6 | 351 | 1   |
| 2020 | 6 | 28 | 3  | 15.8 | 0   | 0   | 0   | 992 | 17.2 | 352 | 1.1 |
| 2020 | 6 | 28 | 4  | 15.4 | 0   | 0   | 0   | 992 | 16.8 | 354 | 1.1 |
| 2020 | 6 | 28 | 5  | 15.4 | 0   | 0   | 0   | 992 | 16.8 | 354 | 1.1 |
| 2020 | 6 | 28 | 6  | 17   | 43  | 115 | 56  | 993 | 19.2 | 356 | 1.4 |
| 2020 | 6 | 28 | 7  | 17   | 124 | 323 | 223 | 993 | 20.8 | 354 | 1.9 |
| 2020 | 6 | 28 | 8  | 17.2 | 201 | 419 | 410 | 993 | 22.7 | 344 | 2   |
| 2020 | 6 | 28 | 9  | 18.1 | 263 | 387 | 521 | 993 | 24.6 | 336 | 2.4 |
| 2020 | 6 | 28 | 10 | 20.1 | 333 | 396 | 654 | 993 | 26   | 330 | 2.7 |
| 2020 | 6 | 28 | 11 | 21.4 | 371 | 458 | 789 | 993 | 26.9 | 324 | 2.8 |
| 2020 | 6 | 28 | 12 | 21.8 | 479 | 252 | 723 | 993 | 27.5 | 313 | 2.9 |
| 2020 | 6 | 28 | 13 | 21.7 | 401 | 510 | 898 | 993 | 27.9 | 305 | 3.1 |
| 2020 | 6 | 28 | 14 | 21.5 | 346 | 555 | 862 | 993 | 27.9 | 302 | 3.1 |
| 2020 | 6 | 28 | 15 | 21.1 | 373 | 334 | 651 | 993 | 27.6 | 302 | 3   |
| 2020 | 6 | 28 | 16 | 20.7 | 182 | 676 | 656 | 993 | 26.9 | 301 | 2.9 |
| 2020 | 6 | 28 | 17 | 20.6 | 156 | 589 | 470 | 993 | 26   | 301 | 2.6 |
| 2020 | 6 | 28 | 18 | 20.8 | 117 | 445 | 270 | 993 | 24.4 | 303 | 2   |
| 2020 | 6 | 28 | 19 | 20.5 | 59  | 201 | 89  | 993 | 21.7 | 308 | 1.2 |
| 2020 | 6 | 28 | 20 | 19.4 | 0   | 0   | 0   | 994 | 19.9 | 318 | 1   |
| 2020 | 6 | 28 | 21 | 18.9 | 0   | 0   | 0   | 994 | 19   | 331 | 0.9 |
| 2020 | 6 | 28 | 22 | 18.4 | 0   | 0   | 0   | 994 | 18.4 | 342 | 0.9 |
| 2020 | 6 | 28 | 23 | 18   | 0   | 0   | 0   | 995 | 18   | 353 | 0.9 |
| 2020 | 6 | 29 | 0  | 17.4 | 0   | 0   | 0   | 994 | 17.4 | 18  | 0.9 |
| 2020 | 6 | 29 | 1  | 17.1 | 0   | 0   | 0   | 994 | 17.1 | 43  | 0.9 |

|      |   |    |    |      |     |     |     |     |      |     |     |
|------|---|----|----|------|-----|-----|-----|-----|------|-----|-----|
| 2020 | 6 | 29 | 2  | 16.9 | 0   | 0   | 0   | 993 | 16.9 | 64  | 0.9 |
| 2020 | 6 | 29 | 3  | 16.5 | 0   | 0   | 0   | 993 | 16.5 | 88  | 1   |
| 2020 | 6 | 29 | 4  | 16.5 | 0   | 0   | 0   | 994 | 16.5 | 111 | 1   |
| 2020 | 6 | 29 | 5  | 17   | 0   | 0   | 0   | 994 | 17   | 111 | 1.2 |
| 2020 | 6 | 29 | 6  | 18.1 | 29  | 0   | 29  | 994 | 18.4 | 120 | 1.7 |
| 2020 | 6 | 29 | 7  | 19.1 | 107 | 19  | 112 | 994 | 19.9 | 123 | 2.6 |
| 2020 | 6 | 29 | 8  | 20   | 145 | 0   | 145 | 994 | 21.1 | 128 | 2.8 |
| 2020 | 6 | 29 | 9  | 20.6 | 167 | 3   | 168 | 993 | 22.2 | 138 | 3.2 |
| 2020 | 6 | 29 | 10 | 20.7 | 226 | 11  | 235 | 993 | 22.7 | 143 | 3.8 |
| 2020 | 6 | 29 | 11 | 20.7 | 185 | 8   | 193 | 992 | 22.4 | 138 | 4.3 |
| 2020 | 6 | 29 | 12 | 20.5 | 148 | 4   | 152 | 991 | 22.2 | 130 | 4.8 |
| 2020 | 6 | 29 | 13 | 20.1 | 166 | 7   | 172 | 990 | 21.8 | 126 | 5.3 |
| 2020 | 6 | 29 | 14 | 19.7 | 269 | 14  | 283 | 989 | 21.6 | 121 | 6   |
| 2020 | 6 | 29 | 15 | 19.6 | 89  | 0   | 89  | 988 | 21.4 | 119 | 6.6 |
| 2020 | 6 | 29 | 16 | 19.8 | 307 | 70  | 356 | 986 | 21.5 | 116 | 7.2 |
| 2020 | 6 | 29 | 17 | 20   | 169 | 7   | 173 | 984 | 21.3 | 114 | 7.5 |
| 2020 | 6 | 29 | 18 | 20.7 | 105 | 0   | 105 | 983 | 21.5 | 120 | 8.1 |
| 2020 | 6 | 29 | 19 | 21.4 | 51  | 57  | 60  | 981 | 22   | 133 | 8.4 |
| 2020 | 6 | 29 | 20 | 22.1 | 0   | 0   | 0   | 980 | 22.5 | 152 | 7.9 |
| 2020 | 6 | 29 | 21 | 22.6 | 0   | 0   | 0   | 979 | 22.9 | 170 | 7.1 |
| 2020 | 6 | 29 | 22 | 22.4 | 0   | 0   | 0   | 978 | 22.6 | 179 | 6.2 |
| 2020 | 6 | 29 | 23 | 22.1 | 0   | 0   | 0   | 977 | 22.3 | 184 | 5.6 |
| 2020 | 6 | 30 | 0  | 21.9 | 0   | 0   | 0   | 976 | 22   | 191 | 5.6 |
| 2020 | 6 | 30 | 1  | 21   | 0   | 0   | 0   | 975 | 21.2 | 199 | 6   |
| 2020 | 6 | 30 | 2  | 19.9 | 0   | 0   | 0   | 975 | 20.1 | 207 | 5.8 |
| 2020 | 6 | 30 | 3  | 19.4 | 0   | 0   | 0   | 975 | 19.6 | 220 | 5.8 |
| 2020 | 6 | 30 | 4  | 19.3 | 0   | 0   | 0   | 976 | 19.5 | 233 | 5.9 |
| 2020 | 6 | 30 | 5  | 19.4 | 0   | 0   | 0   | 976 | 19.6 | 245 | 6   |
| 2020 | 6 | 30 | 6  | 19.8 | 44  | 77  | 52  | 977 | 20.1 | 255 | 6.4 |
| 2020 | 6 | 30 | 7  | 19.8 | 127 | 291 | 216 | 979 | 20.4 | 264 | 6.6 |
| 2020 | 6 | 30 | 8  | 19.3 | 184 | 451 | 407 | 980 | 20.7 | 273 | 6.7 |
| 2020 | 6 | 30 | 9  | 19   | 161 | 2   | 163 | 981 | 21.5 | 279 | 6.9 |
| 2020 | 6 | 30 | 10 | 18.7 | 153 | 3   | 155 | 982 | 22.3 | 284 | 7.1 |
| 2020 | 6 | 30 | 11 | 18.6 | 174 | 7   | 180 | 983 | 22.8 | 287 | 7.1 |
| 2020 | 6 | 30 | 12 | 18.5 | 250 | 13  | 263 | 983 | 23   | 288 | 7.1 |
| 2020 | 6 | 30 | 13 | 18.4 | 416 | 39  | 454 | 984 | 23   | 286 | 6.9 |
| 2020 | 6 | 30 | 14 | 18.2 | 429 | 64  | 489 | 984 | 22.8 | 284 | 6.8 |
| 2020 | 6 | 30 | 15 | 18   | 214 | 10  | 222 | 984 | 22.3 | 284 | 6.4 |
| 2020 | 6 | 30 | 16 | 17.8 | 89  | 0   | 89  | 985 | 21.8 | 284 | 5.9 |
| 2020 | 6 | 30 | 17 | 17.6 | 59  | 0   | 59  | 985 | 21.1 | 285 | 5.3 |
| 2020 | 6 | 30 | 18 | 17.7 | 21  | 0   | 21  | 985 | 20.2 | 286 | 4.3 |
| 2020 | 6 | 30 | 19 | 17.9 | 7   | 0   | 7   | 986 | 19   | 285 | 3.4 |
| 2020 | 6 | 30 | 20 | 18   | 0   | 0   | 0   | 987 | 18.4 | 285 | 3   |
| 2020 | 6 | 30 | 21 | 18   | 0   | 0   | 0   | 987 | 18.3 | 288 | 2.5 |
| 2020 | 6 | 30 | 22 | 18   | 0   | 0   | 0   | 988 | 18.1 | 293 | 2.2 |
| 2020 | 6 | 30 | 23 | 17.8 | 0   | 0   | 0   | 988 | 17.9 | 301 | 2.1 |
| 2020 | 7 | 1  | 0  | 17.6 | 0   | 0   | 0   | 988 | 17.6 | 313 | 2.1 |
| 2020 | 7 | 1  | 1  | 17.4 | 0   | 0   | 0   | 989 | 17.4 | 321 | 2.1 |
| 2020 | 7 | 1  | 2  | 17.1 | 0   | 0   | 0   | 989 | 17.1 | 324 | 2   |
| 2020 | 7 | 1  | 3  | 16.9 | 0   | 0   | 0   | 989 | 16.9 | 325 | 2.1 |

|      |   |   |    |      |     |     |     |      |      |     |     |
|------|---|---|----|------|-----|-----|-----|------|------|-----|-----|
| 2020 | 7 | 1 | 4  | 16.8 | 0   | 0   | 0   | 990  | 16.9 | 325 | 2.3 |
| 2020 | 7 | 1 | 5  | 16.9 | 0   | 0   | 0   | 991  | 17   | 328 | 2.7 |
| 2020 | 7 | 1 | 6  | 17.7 | 35  | 212 | 58  | 991  | 18.2 | 332 | 3.3 |
| 2020 | 7 | 1 | 7  | 18.1 | 91  | 435 | 223 | 992  | 19.4 | 339 | 3.7 |
| 2020 | 7 | 1 | 8  | 18.1 | 182 | 350 | 355 | 992  | 20.8 | 343 | 3.9 |
| 2020 | 7 | 1 | 9  | 18   | 224 | 484 | 547 | 993  | 22   | 343 | 4.1 |
| 2020 | 7 | 1 | 10 | 17.8 | 261 | 593 | 740 | 993  | 22.9 | 339 | 4.2 |
| 2020 | 7 | 1 | 11 | 18   | 271 | 645 | 860 | 993  | 23.9 | 336 | 4.2 |
| 2020 | 7 | 1 | 12 | 18.4 | 172 | 815 | 962 | 993  | 24.6 | 333 | 4   |
| 2020 | 7 | 1 | 13 | 18.7 | 192 | 790 | 962 | 993  | 25.1 | 328 | 3.9 |
| 2020 | 7 | 1 | 14 | 18.7 | 215 | 740 | 902 | 993  | 25   | 321 | 3.9 |
| 2020 | 7 | 1 | 15 | 18.5 | 172 | 759 | 806 | 994  | 24.9 | 314 | 3.8 |
| 2020 | 7 | 1 | 16 | 18.1 | 321 | 123 | 407 | 994  | 24.5 | 309 | 3.6 |
| 2020 | 7 | 1 | 17 | 17.9 | 142 | 0   | 142 | 994  | 23.8 | 309 | 2.9 |
| 2020 | 7 | 1 | 18 | 18.3 | 69  | 0   | 69  | 995  | 22.7 | 308 | 1.9 |
| 2020 | 7 | 1 | 19 | 18.3 | 56  | 204 | 87  | 995  | 20.3 | 305 | 1   |
| 2020 | 7 | 1 | 20 | 17.2 | 0   | 0   | 0   | 996  | 19.3 | 303 | 0.9 |
| 2020 | 7 | 1 | 21 | 16.8 | 0   | 0   | 0   | 996  | 19.2 | 293 | 0.7 |
| 2020 | 7 | 1 | 22 | 16.5 | 0   | 0   | 0   | 997  | 19.2 | 274 | 0.6 |
| 2020 | 7 | 1 | 23 | 16.5 | 0   | 0   | 0   | 997  | 18.5 | 259 | 0.7 |
| 2020 | 7 | 2 | 0  | 16.3 | 0   | 0   | 0   | 997  | 17.8 | 252 | 0.7 |
| 2020 | 7 | 2 | 1  | 16.1 | 0   | 0   | 0   | 997  | 17.4 | 238 | 0.6 |
| 2020 | 7 | 2 | 2  | 16   | 0   | 0   | 0   | 997  | 17.7 | 229 | 0.4 |
| 2020 | 7 | 2 | 3  | 15.7 | 0   | 0   | 0   | 997  | 17.8 | 156 | 0.1 |
| 2020 | 7 | 2 | 4  | 15.2 | 0   | 0   | 0   | 997  | 17.2 | 92  | 0.4 |
| 2020 | 7 | 2 | 5  | 14.9 | 0   | 0   | 0   | 997  | 16.6 | 89  | 0.6 |
| 2020 | 7 | 2 | 6  | 16.3 | 5   | 0   | 5   | 998  | 18.2 | 85  | 0.8 |
| 2020 | 7 | 2 | 7  | 16   | 12  | 0   | 12  | 998  | 19.4 | 82  | 1.2 |
| 2020 | 7 | 2 | 8  | 16.2 | 199 | 65  | 231 | 999  | 21.9 | 68  | 0.7 |
| 2020 | 7 | 2 | 9  | 16.8 | 247 | 26  | 264 | 999  | 24.4 | 39  | 0.4 |
| 2020 | 7 | 2 | 10 | 17.8 | 337 | 43  | 372 | 998  | 25.8 | 82  | 0.2 |
| 2020 | 7 | 2 | 11 | 18.3 | 444 | 109 | 544 | 998  | 26.4 | 162 | 0.5 |
| 2020 | 7 | 2 | 12 | 18.8 | 488 | 163 | 646 | 998  | 26.8 | 176 | 1   |
| 2020 | 7 | 2 | 13 | 19   | 491 | 185 | 672 | 998  | 26.6 | 181 | 1.4 |
| 2020 | 7 | 2 | 14 | 19.2 | 448 | 93  | 534 | 998  | 26.5 | 180 | 1.5 |
| 2020 | 7 | 2 | 15 | 19.3 | 336 | 414 | 682 | 998  | 26.1 | 179 | 1.6 |
| 2020 | 7 | 2 | 16 | 19.4 | 324 | 392 | 599 | 998  | 25.7 | 177 | 1.5 |
| 2020 | 7 | 2 | 17 | 19.8 | 260 | 302 | 421 | 998  | 25.1 | 170 | 1.2 |
| 2020 | 7 | 2 | 18 | 19.7 | 169 | 179 | 231 | 999  | 24.2 | 158 | 1.1 |
| 2020 | 7 | 2 | 19 | 20.4 | 52  | 51  | 59  | 999  | 22.3 | 150 | 0.8 |
| 2020 | 7 | 2 | 20 | 19.4 | 0   | 0   | 0   | 999  | 21   | 145 | 0.8 |
| 2020 | 7 | 2 | 21 | 19.4 | 0   | 0   | 0   | 1000 | 20.6 | 136 | 0.8 |
| 2020 | 7 | 2 | 22 | 19.3 | 0   | 0   | 0   | 1000 | 20.1 | 123 | 0.8 |
| 2020 | 7 | 2 | 23 | 19.1 | 0   | 0   | 0   | 1000 | 19.7 | 113 | 0.9 |
| 2020 | 7 | 3 | 0  | 18.8 | 0   | 0   | 0   | 1000 | 19.3 | 105 | 0.9 |
| 2020 | 7 | 3 | 1  | 18.4 | 0   | 0   | 0   | 999  | 18.9 | 99  | 1.1 |
| 2020 | 7 | 3 | 2  | 18   | 0   | 0   | 0   | 1000 | 18.6 | 101 | 1.2 |
| 2020 | 7 | 3 | 3  | 17.6 | 0   | 0   | 0   | 1000 | 18.3 | 104 | 1.3 |
| 2020 | 7 | 3 | 4  | 17.2 | 0   | 0   | 0   | 1000 | 18.1 | 108 | 1.5 |
| 2020 | 7 | 3 | 5  | 16.8 | 0   | 0   | 0   | 1000 | 17.9 | 107 | 1.6 |



|      |   |   |    |      |     |    |     |      |      |     |     |
|------|---|---|----|------|-----|----|-----|------|------|-----|-----|
| 2020 | 7 | 3 | 6  | 16.7 | 9   | 0  | 9   | 1000 | 18.3 | 103 | 1.9 |
| 2020 | 7 | 3 | 7  | 16.6 | 73  | 0  | 73  | 1000 | 18.7 | 99  | 2.5 |
| 2020 | 7 | 3 | 8  | 16.9 | 69  | 0  | 69  | 999  | 19.3 | 100 | 2.8 |
| 2020 | 7 | 3 | 9  | 17.5 | 116 | 0  | 116 | 999  | 19.9 | 102 | 2.9 |
| 2020 | 7 | 3 | 10 | 17.8 | 263 | 16 | 276 | 999  | 20.6 | 104 | 3.5 |
| 2020 | 7 | 3 | 11 | 18.1 | 397 | 47 | 440 | 998  | 21.4 | 104 | 3.9 |
| 2020 | 7 | 3 | 12 | 18.3 | 426 | 47 | 471 | 997  | 22.1 | 103 | 4.4 |
| 2020 | 7 | 3 | 13 | 18.6 | 340 | 21 | 360 | 996  | 22.9 | 104 | 5   |
| 2020 | 7 | 3 | 14 | 18.7 | 197 | 9  | 206 | 995  | 23.5 | 105 | 5.1 |
| 2020 | 7 | 3 | 15 | 18.7 | 147 | 2  | 149 | 995  | 23.5 | 107 | 4.8 |
| 2020 | 7 | 3 | 16 | 18.8 | 193 | 7  | 197 | 995  | 22.5 | 106 | 4   |
| 2020 | 7 | 3 | 17 | 19.2 | 159 | 2  | 160 | 995  | 21.9 | 98  | 3.1 |
| 2020 | 7 | 3 | 18 | 19.4 | 120 | 15 | 125 | 995  | 21.2 | 83  | 2.4 |
| 2020 | 7 | 3 | 19 | 19.3 | 19  | 0  | 19  | 996  | 20   | 71  | 1.5 |
| 2020 | 7 | 3 | 20 | 18.9 | 0   | 0  | 0   | 996  | 19.4 | 58  | 1.3 |
| 2020 | 7 | 3 | 21 | 18.7 | 0   | 0  | 0   | 996  | 19.1 | 48  | 1.4 |
| 2020 | 7 | 3 | 22 | 18.5 | 0   | 0  | 0   | 996  | 18.9 | 45  | 1.7 |
| 2020 | 7 | 3 | 23 | 18   | 0   | 0  | 0   | 995  | 18.5 | 48  | 1.8 |
| 2020 | 7 | 4 | 0  | 17.5 | 0   | 0  | 0   | 995  | 17.9 | 48  | 1.4 |
| 2020 | 7 | 4 | 1  | 17.2 | 0   | 0  | 0   | 995  | 17.6 | 48  | 1.2 |
| 2020 | 7 | 4 | 2  | 17.1 | 0   | 0  | 0   | 995  | 17.5 | 47  | 1.2 |
| 2020 | 7 | 4 | 3  | 17   | 0   | 0  | 0   | 995  | 17.4 | 45  | 1.1 |
| 2020 | 7 | 4 | 4  | 16.8 | 0   | 0  | 0   | 995  | 17.2 | 44  | 1   |
| 2020 | 7 | 4 | 5  | 16.8 | 0   | 0  | 0   | 995  | 17.2 | 39  | 0.9 |
| 2020 | 7 | 4 | 6  | 17   | 25  | 0  | 25  | 996  | 17.8 | 41  | 1.4 |
| 2020 | 7 | 4 | 7  | 17.4 | 93  | 0  | 93  | 996  | 19.1 | 53  | 1.4 |
| 2020 | 7 | 4 | 8  | 17.2 | 122 | 0  | 122 | 996  | 20.4 | 64  | 1.1 |
| 2020 | 7 | 4 | 9  | 17.4 | 232 | 19 | 244 | 996  | 21.7 | 93  | 0.4 |
| 2020 | 7 | 4 | 10 | 17.8 | 297 | 24 | 317 | 996  | 22.8 | 218 | 0.7 |
| 2020 | 7 | 4 | 11 | 18.4 | 388 | 42 | 427 | 995  | 23.6 | 221 | 1.4 |
| 2020 | 7 | 4 | 12 | 18.8 | 181 | 8  | 189 | 994  | 24   | 223 | 1.7 |
| 2020 | 7 | 4 | 13 | 19.2 | 308 | 17 | 325 | 994  | 24.5 | 232 | 1.8 |
| 2020 | 7 | 4 | 14 | 19.2 | 390 | 39 | 426 | 993  | 24.3 | 238 | 1.8 |
| 2020 | 7 | 4 | 15 | 19.2 | 146 | 2  | 147 | 993  | 23.9 | 240 | 2.2 |
| 2020 | 7 | 4 | 16 | 19.3 | 148 | 0  | 149 | 994  | 23.4 | 246 | 2.6 |
| 2020 | 7 | 4 | 17 | 19.3 | 30  | 0  | 30  | 994  | 22.6 | 256 | 2.5 |
| 2020 | 7 | 4 | 18 | 19.4 | 22  | 0  | 22  | 994  | 21.6 | 265 | 1.7 |
| 2020 | 7 | 4 | 19 | 19.3 | 7   | 0  | 7   | 995  | 20.4 | 271 | 0.8 |
| 2020 | 7 | 4 | 20 | 18.3 | 0   | 0  | 0   | 995  | 19.3 | 263 | 0.7 |
| 2020 | 7 | 4 | 21 | 17.6 | 0   | 0  | 0   | 995  | 18.9 | 245 | 0.7 |
| 2020 | 7 | 4 | 22 | 17.2 | 0   | 0  | 0   | 995  | 18.4 | 224 | 0.7 |
| 2020 | 7 | 4 | 23 | 17   | 0   | 0  | 0   | 995  | 17.8 | 208 | 0.8 |
| 2020 | 7 | 5 | 0  | 16.7 | 0   | 0  | 0   | 995  | 17.4 | 195 | 0.8 |
| 2020 | 7 | 5 | 1  | 16.7 | 0   | 0  | 0   | 995  | 17.1 | 185 | 0.8 |
| 2020 | 7 | 5 | 2  | 16.6 | 0   | 0  | 0   | 994  | 17   | 171 | 0.8 |
| 2020 | 7 | 5 | 3  | 16.6 | 0   | 0  | 0   | 994  | 16.9 | 166 | 0.7 |
| 2020 | 7 | 5 | 4  | 16.8 | 0   | 0  | 0   | 995  | 17.1 | 154 | 0.6 |
| 2020 | 7 | 5 | 5  | 16.8 | 0   | 0  | 0   | 995  | 17.2 | 138 | 0.6 |
| 2020 | 7 | 5 | 6  | 17.8 | 16  | 0  | 16  | 995  | 18.5 | 123 | 0.9 |
| 2020 | 7 | 5 | 7  | 18.2 | 99  | 5  | 101 | 995  | 20.1 | 135 | 1.1 |

|      |   |   |    |      |     |     |     |     |      |     |     |
|------|---|---|----|------|-----|-----|-----|-----|------|-----|-----|
| 2020 | 7 | 5 | 8  | 18.7 | 206 | 127 | 268 | 995 | 21.7 | 154 | 1.3 |
| 2020 | 7 | 5 | 9  | 19   | 293 | 87  | 350 | 994 | 22.9 | 165 | 1.8 |
| 2020 | 7 | 5 | 10 | 19.5 | 383 | 209 | 552 | 994 | 24   | 164 | 2.4 |
| 2020 | 7 | 5 | 11 | 20.1 | 385 | 41  | 423 | 993 | 25   | 163 | 2.6 |
| 2020 | 7 | 5 | 12 | 20.5 | 385 | 30  | 414 | 992 | 25.8 | 171 | 2.9 |
| 2020 | 7 | 5 | 13 | 20.6 | 481 | 254 | 728 | 992 | 25.8 | 175 | 3.1 |
| 2020 | 7 | 5 | 14 | 20.8 | 460 | 128 | 579 | 991 | 25.8 | 174 | 3.2 |
| 2020 | 7 | 5 | 15 | 20.7 | 332 | 32  | 359 | 991 | 25.6 | 170 | 3   |
| 2020 | 7 | 5 | 16 | 20.7 | 192 | 634 | 636 | 991 | 25.3 | 163 | 3   |
| 2020 | 7 | 5 | 17 | 20.7 | 228 | 114 | 289 | 991 | 24.7 | 162 | 2.8 |
| 2020 | 7 | 5 | 18 | 21   | 134 | 96  | 168 | 991 | 23.5 | 162 | 2.1 |
| 2020 | 7 | 5 | 19 | 21.1 | 58  | 170 | 84  | 992 | 21.8 | 159 | 1.2 |
| 2020 | 7 | 5 | 20 | 20.5 | 0   | 0   | 0   | 991 | 20.5 | 154 | 1   |
| 2020 | 7 | 5 | 21 | 19.9 | 0   | 0   | 0   | 991 | 19.9 | 146 | 1   |
| 2020 | 7 | 5 | 22 | 19.5 | 0   | 0   | 0   | 991 | 19.5 | 140 | 1.1 |
| 2020 | 7 | 5 | 23 | 19.2 | 0   | 0   | 0   | 991 | 19.2 | 136 | 1.1 |
| 2020 | 7 | 6 | 0  | 18.9 | 0   | 0   | 0   | 990 | 18.9 | 129 | 1.2 |
| 2020 | 7 | 6 | 1  | 18.9 | 0   | 0   | 0   | 990 | 18.9 | 121 | 1.3 |
| 2020 | 7 | 6 | 2  | 18.8 | 0   | 0   | 0   | 989 | 18.8 | 119 | 1.2 |
| 2020 | 7 | 6 | 3  | 18.8 | 0   | 0   | 0   | 989 | 18.8 | 122 | 1.2 |
| 2020 | 7 | 6 | 4  | 18.9 | 0   | 0   | 0   | 989 | 19   | 119 | 1.1 |
| 2020 | 7 | 6 | 5  | 19.1 | 0   | 0   | 0   | 989 | 19.2 | 104 | 1.4 |
| 2020 | 7 | 6 | 6  | 19.7 | 33  | 53  | 39  | 989 | 20   | 97  | 2.2 |
| 2020 | 7 | 6 | 7  | 20.6 | 71  | 0   | 71  | 988 | 21.3 | 100 | 3   |
| 2020 | 7 | 6 | 8  | 21.6 | 204 | 110 | 258 | 988 | 22.7 | 106 | 2.9 |
| 2020 | 7 | 6 | 9  | 22.1 | 280 | 304 | 482 | 988 | 23.6 | 107 | 2.7 |
| 2020 | 7 | 6 | 10 | 22.5 | 229 | 11  | 237 | 988 | 24.2 | 107 | 2.7 |
| 2020 | 7 | 6 | 11 | 23.2 | 288 | 16  | 303 | 989 | 25.9 | 118 | 2.5 |
| 2020 | 7 | 6 | 12 | 23.1 | 273 | 15  | 287 | 989 | 26.2 | 132 | 2.4 |
| 2020 | 7 | 6 | 13 | 23.1 | 240 | 13  | 252 | 988 | 26.1 | 140 | 2.5 |
| 2020 | 7 | 6 | 14 | 23.6 | 195 | 9   | 204 | 988 | 26.5 | 144 | 2.8 |
| 2020 | 7 | 6 | 15 | 23.7 | 161 | 4   | 164 | 988 | 26.6 | 154 | 2.9 |
| 2020 | 7 | 6 | 16 | 23.7 | 229 | 14  | 239 | 989 | 26.2 | 160 | 2.9 |
| 2020 | 7 | 6 | 17 | 23.8 | 28  | 0   | 28  | 989 | 25.5 | 164 | 2.7 |
| 2020 | 7 | 6 | 18 | 23.8 | 12  | 0   | 12  | 989 | 24.7 | 170 | 2.1 |
| 2020 | 7 | 6 | 19 | 23.3 | 5   | 0   | 5   | 989 | 23.3 | 177 | 1.2 |
| 2020 | 7 | 6 | 20 | 22.4 | 0   | 0   | 0   | 990 | 22.4 | 183 | 1.1 |
| 2020 | 7 | 6 | 21 | 21.9 | 0   | 0   | 0   | 990 | 21.9 | 194 | 1.1 |
| 2020 | 7 | 6 | 22 | 21.4 | 0   | 0   | 0   | 990 | 21.4 | 207 | 1   |
| 2020 | 7 | 6 | 23 | 20.9 | 0   | 0   | 0   | 990 | 20.9 | 221 | 1   |
| 2020 | 7 | 7 | 0  | 20.5 | 0   | 0   | 0   | 990 | 20.5 | 238 | 0.9 |
| 2020 | 7 | 7 | 1  | 20.3 | 0   | 0   | 0   | 990 | 20.3 | 251 | 0.9 |
| 2020 | 7 | 7 | 2  | 19.9 | 0   | 0   | 0   | 990 | 19.9 | 251 | 0.8 |
| 2020 | 7 | 7 | 3  | 19.7 | 0   | 0   | 0   | 990 | 19.7 | 234 | 0.8 |
| 2020 | 7 | 7 | 4  | 19.5 | 0   | 0   | 0   | 992 | 19.5 | 251 | 0.9 |
| 2020 | 7 | 7 | 5  | 19.5 | 0   | 0   | 0   | 992 | 19.5 | 248 | 0.8 |
| 2020 | 7 | 7 | 6  | 20.8 | 37  | 63  | 43  | 993 | 21.1 | 232 | 1.3 |
| 2020 | 7 | 7 | 7  | 21.5 | 121 | 282 | 204 | 993 | 22.6 | 230 | 1.4 |
| 2020 | 7 | 7 | 8  | 21.7 | 176 | 450 | 396 | 993 | 24   | 225 | 1.2 |
| 2020 | 7 | 7 | 9  | 21.4 | 212 | 563 | 584 | 993 | 25.6 | 232 | 0.5 |

|      |   |   |    |      |     |     |     |     |      |     |     |
|------|---|---|----|------|-----|-----|-----|-----|------|-----|-----|
| 2020 | 7 | 7 | 10 | 21.3 | 237 | 631 | 745 | 992 | 27.1 | 304 | 0.1 |
| 2020 | 7 | 7 | 11 | 21.7 | 261 | 659 | 860 | 992 | 28   | 155 | 1   |
| 2020 | 7 | 7 | 12 | 22.2 | 310 | 624 | 912 | 992 | 28.6 | 157 | 1.8 |
| 2020 | 7 | 7 | 13 | 22.5 | 312 | 624 | 920 | 992 | 28.9 | 166 | 1.6 |
| 2020 | 7 | 7 | 14 | 22.6 | 389 | 412 | 771 | 991 | 29.2 | 190 | 1.2 |
| 2020 | 7 | 7 | 15 | 22.7 | 274 | 591 | 768 | 991 | 29.1 | 223 | 1.3 |
| 2020 | 7 | 7 | 16 | 22.8 | 251 | 522 | 617 | 991 | 28.7 | 249 | 1.7 |
| 2020 | 7 | 7 | 17 | 23.1 | 193 | 23  | 205 | 991 | 27.7 | 268 | 1.8 |
| 2020 | 7 | 7 | 18 | 23.1 | 153 | 263 | 244 | 991 | 26.2 | 287 | 1.9 |
| 2020 | 7 | 7 | 19 | 22.6 | 59  | 79  | 71  | 992 | 23.9 | 302 | 1.6 |
| 2020 | 7 | 7 | 20 | 21.7 | 0   | 0   | 0   | 993 | 22.3 | 312 | 1.7 |
| 2020 | 7 | 7 | 21 | 21.2 | 0   | 0   | 0   | 993 | 21.4 | 320 | 1.6 |
| 2020 | 7 | 7 | 22 | 20.7 | 0   | 0   | 0   | 993 | 20.8 | 328 | 1.3 |
| 2020 | 7 | 7 | 23 | 20.3 | 0   | 0   | 0   | 993 | 20.3 | 330 | 1.1 |
| 2020 | 7 | 8 | 0  | 19.9 | 0   | 0   | 0   | 993 | 19.9 | 325 | 1.1 |
| 2020 | 7 | 8 | 1  | 19.6 | 0   | 0   | 0   | 993 | 19.6 | 317 | 1.1 |
| 2020 | 7 | 8 | 2  | 19.3 | 0   | 0   | 0   | 993 | 19.3 | 314 | 1.2 |
| 2020 | 7 | 8 | 3  | 18.9 | 0   | 0   | 0   | 993 | 18.9 | 317 | 1.2 |
| 2020 | 7 | 8 | 4  | 18.7 | 0   | 0   | 0   | 993 | 18.7 | 321 | 1.2 |
| 2020 | 7 | 8 | 5  | 18.7 | 0   | 0   | 0   | 993 | 18.7 | 324 | 1.1 |
| 2020 | 7 | 8 | 6  | 20.4 | 37  | 70  | 43  | 994 | 20.9 | 329 | 1.9 |
| 2020 | 7 | 8 | 7  | 20.5 | 120 | 304 | 210 | 994 | 22.2 | 341 | 2.2 |
| 2020 | 7 | 8 | 8  | 20.8 | 171 | 484 | 406 | 994 | 23.6 | 350 | 2   |
| 2020 | 7 | 8 | 9  | 21.1 | 204 | 598 | 598 | 994 | 25.1 | 357 | 1.6 |
| 2020 | 7 | 8 | 10 | 21.4 | 249 | 604 | 735 | 994 | 26.5 | 360 | 1.1 |
| 2020 | 7 | 8 | 11 | 21.6 | 419 | 325 | 714 | 993 | 27.5 | 349 | 0.7 |
| 2020 | 7 | 8 | 12 | 21.6 | 405 | 487 | 875 | 993 | 28.1 | 313 | 0.7 |
| 2020 | 7 | 8 | 13 | 21.4 | 419 | 402 | 810 | 992 | 28   | 298 | 1   |
| 2020 | 7 | 8 | 14 | 21.3 | 383 | 437 | 788 | 992 | 27.5 | 291 | 1.4 |
| 2020 | 7 | 8 | 15 | 21.6 | 382 | 301 | 633 | 992 | 27   | 291 | 1.6 |
| 2020 | 7 | 8 | 16 | 21.8 | 251 | 21  | 266 | 992 | 26.5 | 294 | 1.8 |
| 2020 | 7 | 8 | 17 | 21.8 | 188 | 19  | 198 | 992 | 25.3 | 298 | 2.1 |
| 2020 | 7 | 8 | 18 | 21.4 | 113 | 349 | 233 | 992 | 23.6 | 304 | 2.4 |
| 2020 | 7 | 8 | 19 | 21   | 61  | 130 | 80  | 993 | 21.9 | 318 | 1.6 |
| 2020 | 7 | 8 | 20 | 20.6 | 0   | 0   | 0   | 993 | 20.9 | 343 | 1   |
| 2020 | 7 | 8 | 21 | 20.2 | 0   | 0   | 0   | 993 | 20.4 | 2   | 0.8 |
| 2020 | 7 | 8 | 22 | 19.9 | 0   | 0   | 0   | 993 | 20   | 18  | 0.7 |
| 2020 | 7 | 8 | 23 | 19.7 | 0   | 0   | 0   | 993 | 19.9 | 34  | 0.6 |
| 2020 | 7 | 9 | 0  | 19.5 | 0   | 0   | 0   | 992 | 19.8 | 52  | 0.6 |
| 2020 | 7 | 9 | 1  | 19.2 | 0   | 0   | 0   | 992 | 19.2 | 75  | 0.8 |
| 2020 | 7 | 9 | 2  | 18.5 | 0   | 0   | 0   | 991 | 18.5 | 97  | 0.9 |
| 2020 | 7 | 9 | 3  | 18.1 | 0   | 0   | 0   | 992 | 18.1 | 113 | 0.9 |
| 2020 | 7 | 9 | 4  | 17.7 | 0   | 0   | 0   | 992 | 17.7 | 116 | 0.9 |
| 2020 | 7 | 9 | 5  | 17.6 | 0   | 0   | 0   | 992 | 17.6 | 111 | 1   |
| 2020 | 7 | 9 | 6  | 19.3 | 36  | 99  | 45  | 992 | 20   | 106 | 2.1 |
| 2020 | 7 | 9 | 7  | 19.5 | 109 | 356 | 213 | 992 | 21.7 | 104 | 2.6 |
| 2020 | 7 | 9 | 8  | 19.6 | 160 | 514 | 409 | 992 | 23.6 | 105 | 2.7 |
| 2020 | 7 | 9 | 9  | 20.2 | 201 | 598 | 594 | 992 | 25.2 | 110 | 2.9 |
| 2020 | 7 | 9 | 10 | 21.2 | 233 | 649 | 753 | 992 | 26.5 | 115 | 2.9 |
| 2020 | 7 | 9 | 11 | 22.2 | 407 | 56  | 457 | 992 | 27.4 | 114 | 2.8 |

|      |   |    |    |      |     |     |     |     |      |     |     |
|------|---|----|----|------|-----|-----|-----|-----|------|-----|-----|
| 2020 | 7 | 9  | 12 | 23   | 476 | 103 | 576 | 991 | 28.1 | 107 | 3   |
| 2020 | 7 | 9  | 13 | 23.4 | 485 | 230 | 709 | 991 | 28.3 | 102 | 3.2 |
| 2020 | 7 | 9  | 14 | 23.5 | 267 | 657 | 876 | 990 | 28.2 | 105 | 3.6 |
| 2020 | 7 | 9  | 15 | 23.5 | 181 | 7   | 187 | 990 | 27.7 | 108 | 3.9 |
| 2020 | 7 | 9  | 16 | 23.7 | 211 | 10  | 218 | 990 | 27.2 | 108 | 4   |
| 2020 | 7 | 9  | 17 | 23.7 | 124 | 0   | 124 | 990 | 26.5 | 112 | 3.9 |
| 2020 | 7 | 9  | 18 | 23.8 | 11  | 0   | 11  | 990 | 25.5 | 115 | 3.2 |
| 2020 | 7 | 9  | 19 | 23.7 | 48  | 8   | 49  | 990 | 24.1 | 114 | 2   |
| 2020 | 7 | 9  | 20 | 23.2 | 0   | 0   | 0   | 990 | 23.3 | 118 | 2   |
| 2020 | 7 | 9  | 21 | 23   | 0   | 0   | 0   | 991 | 23.2 | 126 | 2.6 |
| 2020 | 7 | 9  | 22 | 22.8 | 0   | 0   | 0   | 991 | 23   | 131 | 2.6 |
| 2020 | 7 | 9  | 23 | 22.7 | 0   | 0   | 0   | 991 | 22.8 | 132 | 2.5 |
| 2020 | 7 | 10 | 0  | 22.5 | 0   | 0   | 0   | 990 | 22.7 | 136 | 2.9 |
| 2020 | 7 | 10 | 1  | 22.4 | 0   | 0   | 0   | 990 | 22.7 | 142 | 3.5 |
| 2020 | 7 | 10 | 2  | 22.2 | 0   | 0   | 0   | 989 | 22.4 | 135 | 4   |
| 2020 | 7 | 10 | 3  | 22.1 | 0   | 0   | 0   | 988 | 22.3 | 128 | 4.5 |
| 2020 | 7 | 10 | 4  | 22   | 0   | 0   | 0   | 988 | 22.3 | 127 | 4.4 |
| 2020 | 7 | 10 | 5  | 22.1 | 0   | 0   | 0   | 988 | 22.5 | 123 | 4.6 |
| 2020 | 7 | 10 | 6  | 22.6 | 20  | 0   | 20  | 988 | 23   | 125 | 4.5 |
| 2020 | 7 | 10 | 7  | 23.1 | 99  | 12  | 103 | 988 | 23.4 | 121 | 4.1 |
| 2020 | 7 | 10 | 8  | 23.5 | 198 | 79  | 236 | 987 | 23.8 | 114 | 4.4 |
| 2020 | 7 | 10 | 9  | 23.9 | 216 | 498 | 543 | 987 | 24.5 | 116 | 3.6 |
| 2020 | 7 | 10 | 10 | 24.5 | 377 | 237 | 567 | 987 | 26.1 | 118 | 3.3 |
| 2020 | 7 | 10 | 11 | 25   | 267 | 14  | 280 | 987 | 27.8 | 109 | 2.6 |
| 2020 | 7 | 10 | 12 | 25.5 | 216 | 11  | 226 | 987 | 29.2 | 127 | 1.9 |
| 2020 | 7 | 10 | 13 | 25.6 | 255 | 14  | 269 | 987 | 29.7 | 184 | 2.2 |
| 2020 | 7 | 10 | 14 | 25.5 | 181 | 8   | 189 | 987 | 29.7 | 216 | 3.3 |
| 2020 | 7 | 10 | 15 | 25.1 | 152 | 777 | 801 | 987 | 29.2 | 234 | 4.1 |
| 2020 | 7 | 10 | 16 | 24.6 | 258 | 24  | 275 | 987 | 27.7 | 244 | 4.4 |
| 2020 | 7 | 10 | 17 | 23.9 | 125 | 633 | 461 | 988 | 25.9 | 250 | 4.2 |
| 2020 | 7 | 10 | 18 | 23.1 | 101 | 470 | 262 | 988 | 24.4 | 254 | 3.7 |
| 2020 | 7 | 10 | 19 | 22.6 | 53  | 199 | 82  | 989 | 23.1 | 253 | 2.4 |
| 2020 | 7 | 10 | 20 | 22.2 | 0   | 0   | 0   | 990 | 22.3 | 246 | 1.6 |
| 2020 | 7 | 10 | 21 | 21.8 | 0   | 0   | 0   | 991 | 21.8 | 237 | 1.3 |
| 2020 | 7 | 10 | 22 | 21.5 | 0   | 0   | 0   | 991 | 21.5 | 228 | 1.3 |
| 2020 | 7 | 10 | 23 | 21.4 | 0   | 0   | 0   | 991 | 21.4 | 228 | 1.4 |
| 2020 | 7 | 11 | 0  | 21.3 | 0   | 0   | 0   | 991 | 21.3 | 230 | 1.3 |
| 2020 | 7 | 11 | 1  | 21.2 | 0   | 0   | 0   | 991 | 21.2 | 233 | 1.4 |
| 2020 | 7 | 11 | 2  | 21.3 | 0   | 0   | 0   | 992 | 21.3 | 255 | 1.4 |
| 2020 | 7 | 11 | 3  | 21.3 | 0   | 0   | 0   | 992 | 21.3 | 269 | 1.2 |
| 2020 | 7 | 11 | 4  | 21.2 | 0   | 0   | 0   | 992 | 21.2 | 280 | 1.2 |
| 2020 | 7 | 11 | 5  | 21.3 | 0   | 0   | 0   | 993 | 21.3 | 292 | 1.5 |
| 2020 | 7 | 11 | 6  | 21.9 | 24  | 0   | 24  | 994 | 22.1 | 299 | 2.2 |
| 2020 | 7 | 11 | 7  | 22.4 | 109 | 78  | 131 | 994 | 22.9 | 308 | 2.1 |
| 2020 | 7 | 11 | 8  | 22.6 | 66  | 0   | 66  | 994 | 23.7 | 319 | 2.1 |
| 2020 | 7 | 11 | 9  | 22.5 | 271 | 331 | 487 | 995 | 24.3 | 323 | 2.3 |
| 2020 | 7 | 11 | 10 | 22.4 | 355 | 63  | 405 | 995 | 25   | 330 | 2.3 |
| 2020 | 7 | 11 | 11 | 22.2 | 449 | 169 | 602 | 995 | 25.5 | 348 | 1.9 |
| 2020 | 7 | 11 | 12 | 22.1 | 486 | 154 | 634 | 994 | 25.8 | 357 | 1.7 |
| 2020 | 7 | 11 | 13 | 22.1 | 489 | 197 | 680 | 994 | 26.1 | 351 | 1.7 |

|      |   |    |    |      |     |     |     |     |      |     |     |
|------|---|----|----|------|-----|-----|-----|-----|------|-----|-----|
| 2020 | 7 | 11 | 14 | 22.5 | 455 | 112 | 559 | 994 | 27.3 | 354 | 1.8 |
| 2020 | 7 | 11 | 15 | 22.5 | 378 | 311 | 638 | 994 | 28   | 8   | 1.5 |
| 2020 | 7 | 11 | 16 | 22.2 | 318 | 108 | 394 | 994 | 28.1 | 353 | 0.8 |
| 2020 | 7 | 11 | 17 | 22.6 | 225 | 203 | 332 | 995 | 27.9 | 271 | 0.5 |
| 2020 | 7 | 11 | 18 | 22.3 | 124 | 256 | 212 | 995 | 27.3 | 225 | 0.7 |
| 2020 | 7 | 11 | 19 | 22.4 | 49  | 150 | 70  | 996 | 25   | 223 | 0.6 |
| 2020 | 7 | 11 | 20 | 21.7 | 0   | 0   | 0   | 996 | 23.9 | 169 | 0.5 |
| 2020 | 7 | 11 | 21 | 21.9 | 0   | 0   | 0   | 997 | 22.8 | 127 | 1.1 |
| 2020 | 7 | 11 | 22 | 21.6 | 0   | 0   | 0   | 997 | 22   | 123 | 1.9 |
| 2020 | 7 | 11 | 23 | 21   | 0   | 0   | 0   | 997 | 21.4 | 123 | 2.7 |
| 2020 | 7 | 12 | 0  | 20.2 | 0   | 0   | 0   | 997 | 20.7 | 118 | 2.9 |
| 2020 | 7 | 12 | 1  | 19.6 | 0   | 0   | 0   | 997 | 20.2 | 115 | 2.8 |
| 2020 | 7 | 12 | 2  | 19.2 | 0   | 0   | 0   | 997 | 19.8 | 113 | 2.8 |
| 2020 | 7 | 12 | 3  | 18.9 | 0   | 0   | 0   | 998 | 19.4 | 108 | 2.6 |
| 2020 | 7 | 12 | 4  | 18.7 | 0   | 0   | 0   | 998 | 19.2 | 107 | 2.6 |
| 2020 | 7 | 12 | 5  | 18.5 | 0   | 0   | 0   | 998 | 19   | 111 | 2.8 |
| 2020 | 7 | 12 | 6  | 18.5 | 10  | 0   | 10  | 998 | 19.2 | 113 | 3.1 |
| 2020 | 7 | 12 | 7  | 18.9 | 52  | 0   | 52  | 999 | 20.1 | 115 | 3.5 |
| 2020 | 7 | 12 | 8  | 19.3 | 170 | 19  | 179 | 999 | 20.7 | 119 | 3.5 |
| 2020 | 7 | 12 | 9  | 19.5 | 172 | 3   | 174 | 999 | 21   | 122 | 4.1 |
| 2020 | 7 | 12 | 10 | 19.7 | 129 | 0   | 129 | 998 | 21.3 | 119 | 4.5 |
| 2020 | 7 | 12 | 11 | 19.9 | 172 | 6   | 178 | 998 | 21.8 | 113 | 4.6 |
| 2020 | 7 | 12 | 12 | 20.2 | 293 | 16  | 308 | 997 | 22.3 | 110 | 4.7 |
| 2020 | 7 | 12 | 13 | 20.3 | 315 | 18  | 333 | 997 | 22.4 | 111 | 4.8 |
| 2020 | 7 | 12 | 14 | 20.2 | 251 | 13  | 262 | 996 | 22.1 | 110 | 5.1 |
| 2020 | 7 | 12 | 15 | 20.1 | 63  | 0   | 63  | 995 | 21.7 | 109 | 5.3 |
| 2020 | 7 | 12 | 16 | 19.9 | 50  | 0   | 50  | 995 | 21.1 | 110 | 5.1 |
| 2020 | 7 | 12 | 17 | 19.6 | 61  | 0   | 61  | 994 | 20.5 | 111 | 4.7 |
| 2020 | 7 | 12 | 18 | 19.3 | 13  | 0   | 13  | 994 | 20.1 | 109 | 4.8 |
| 2020 | 7 | 12 | 19 | 19   | 6   | 0   | 6   | 994 | 19.7 | 111 | 5.1 |
| 2020 | 7 | 12 | 20 | 18.9 | 0   | 0   | 0   | 994 | 19.6 | 112 | 5.5 |
| 2020 | 7 | 12 | 21 | 18.9 | 0   | 0   | 0   | 994 | 19.6 | 114 | 5.7 |
| 2020 | 7 | 12 | 22 | 19   | 0   | 0   | 0   | 993 | 19.6 | 116 | 5.8 |
| 2020 | 7 | 12 | 23 | 19.3 | 0   | 0   | 0   | 993 | 19.8 | 120 | 5.5 |
| 2020 | 7 | 13 | 0  | 19.6 | 0   | 0   | 0   | 992 | 20.1 | 130 | 5.2 |
| 2020 | 7 | 13 | 1  | 20.3 | 0   | 0   | 0   | 992 | 20.5 | 139 | 4.4 |
| 2020 | 7 | 13 | 2  | 20.9 | 0   | 0   | 0   | 991 | 21   | 142 | 3.7 |
| 2020 | 7 | 13 | 3  | 21.6 | 0   | 0   | 0   | 991 | 21.7 | 146 | 3.6 |
| 2020 | 7 | 13 | 4  | 22.4 | 0   | 0   | 0   | 991 | 22.6 | 154 | 3.9 |
| 2020 | 7 | 13 | 5  | 22.9 | 0   | 0   | 0   | 990 | 23.1 | 154 | 4   |
| 2020 | 7 | 13 | 6  | 22.9 | 28  | 8   | 29  | 989 | 23.1 | 145 | 4.4 |
| 2020 | 7 | 13 | 7  | 23.3 | 108 | 97  | 135 | 988 | 23.5 | 153 | 4.1 |
| 2020 | 7 | 13 | 8  | 24.6 | 160 | 10  | 165 | 988 | 25.1 | 200 | 3.9 |
| 2020 | 7 | 13 | 9  | 25   | 238 | 23  | 253 | 988 | 25.7 | 231 | 4.3 |
| 2020 | 7 | 13 | 10 | 25.1 | 50  | 0   | 50  | 988 | 25.7 | 240 | 3.9 |
| 2020 | 7 | 13 | 11 | 25.2 | 143 | 2   | 145 | 988 | 25.9 | 243 | 3.9 |
| 2020 | 7 | 13 | 12 | 25.1 | 97  | 0   | 97  | 988 | 25.8 | 250 | 4.1 |
| 2020 | 7 | 13 | 13 | 24.4 | 183 | 9   | 191 | 988 | 25.4 | 257 | 4.4 |
| 2020 | 7 | 13 | 14 | 23.4 | 361 | 29  | 388 | 988 | 24.7 | 256 | 4.4 |
| 2020 | 7 | 13 | 15 | 22.8 | 364 | 53  | 409 | 988 | 24.4 | 250 | 4.3 |

|      |   |    |    |      |     |     |     |     |      |     |     |
|------|---|----|----|------|-----|-----|-----|-----|------|-----|-----|
| 2020 | 7 | 13 | 16 | 22.3 | 290 | 49  | 324 | 988 | 23.9 | 242 | 4.1 |
| 2020 | 7 | 13 | 17 | 21.7 | 224 | 209 | 334 | 988 | 23.2 | 235 | 3.7 |
| 2020 | 7 | 13 | 18 | 21.5 | 27  | 0   | 27  | 988 | 22.5 | 225 | 3.3 |
| 2020 | 7 | 13 | 19 | 21.2 | 50  | 200 | 79  | 989 | 21.6 | 209 | 2.6 |
| 2020 | 7 | 13 | 20 | 20.8 | 0   | 0   | 0   | 989 | 21   | 201 | 2.7 |
| 2020 | 7 | 13 | 21 | 20.5 | 0   | 0   | 0   | 989 | 20.7 | 195 | 2.9 |
| 2020 | 7 | 13 | 22 | 20.3 | 0   | 0   | 0   | 989 | 20.5 | 191 | 3.1 |
| 2020 | 7 | 13 | 23 | 20   | 0   | 0   | 0   | 989 | 20.3 | 188 | 3.4 |
| 2020 | 7 | 14 | 0  | 19.9 | 0   | 0   | 0   | 988 | 20.1 | 188 | 3.4 |
| 2020 | 7 | 14 | 1  | 19.7 | 0   | 0   | 0   | 988 | 20   | 191 | 3.4 |
| 2020 | 7 | 14 | 2  | 19.7 | 0   | 0   | 0   | 988 | 19.9 | 197 | 3.4 |
| 2020 | 7 | 14 | 3  | 19.7 | 0   | 0   | 0   | 987 | 19.9 | 215 | 3.4 |
| 2020 | 7 | 14 | 4  | 19.9 | 0   | 0   | 0   | 988 | 20   | 237 | 3.6 |
| 2020 | 7 | 14 | 5  | 19.8 | 0   | 0   | 0   | 988 | 20   | 250 | 3.8 |
| 2020 | 7 | 14 | 6  | 19.8 | 11  | 0   | 11  | 989 | 20.1 | 253 | 4.3 |
| 2020 | 7 | 14 | 7  | 19.7 | 24  | 0   | 24  | 989 | 20.4 | 256 | 4.9 |
| 2020 | 7 | 14 | 8  | 19.6 | 169 | 19  | 178 | 989 | 21   | 260 | 5.2 |
| 2020 | 7 | 14 | 9  | 19.6 | 276 | 61  | 316 | 989 | 21.6 | 260 | 5.2 |
| 2020 | 7 | 14 | 10 | 19.8 | 265 | 17  | 279 | 989 | 22.3 | 261 | 5.1 |
| 2020 | 7 | 14 | 11 | 19.9 | 336 | 24  | 358 | 989 | 22.8 | 263 | 4.9 |
| 2020 | 7 | 14 | 12 | 20.2 | 212 | 11  | 223 | 989 | 23.4 | 266 | 4.8 |
| 2020 | 7 | 14 | 13 | 20.5 | 162 | 6   | 168 | 989 | 23.7 | 270 | 4.5 |
| 2020 | 7 | 14 | 14 | 20.7 | 203 | 10  | 212 | 988 | 24   | 277 | 4.1 |
| 2020 | 7 | 14 | 15 | 20.9 | 186 | 7   | 192 | 988 | 24.1 | 288 | 3.7 |
| 2020 | 7 | 14 | 16 | 21   | 194 | 7   | 199 | 988 | 23.7 | 303 | 3.3 |
| 2020 | 7 | 14 | 17 | 21.1 | 155 | 1   | 156 | 988 | 22.7 | 317 | 2.6 |
| 2020 | 7 | 14 | 18 | 21   | 82  | 0   | 82  | 989 | 21.8 | 327 | 2.7 |
| 2020 | 7 | 14 | 19 | 20.7 | 5   | 0   | 5   | 990 | 21.1 | 340 | 2.6 |
| 2020 | 7 | 14 | 20 | 20.2 | 0   | 0   | 0   | 990 | 20.5 | 349 | 2.5 |
| 2020 | 7 | 14 | 21 | 19.9 | 0   | 0   | 0   | 991 | 20.2 | 348 | 2.2 |
| 2020 | 7 | 14 | 22 | 19.7 | 0   | 0   | 0   | 992 | 19.9 | 341 | 1.9 |
| 2020 | 7 | 14 | 23 | 19.5 | 0   | 0   | 0   | 992 | 19.7 | 342 | 1.7 |
| 2020 | 7 | 15 | 0  | 19.3 | 0   | 0   | 0   | 992 | 19.5 | 339 | 1.7 |
| 2020 | 7 | 15 | 1  | 19.2 | 0   | 0   | 0   | 992 | 19.4 | 335 | 1.8 |
| 2020 | 7 | 15 | 2  | 19   | 0   | 0   | 0   | 992 | 19.2 | 331 | 1.9 |
| 2020 | 7 | 15 | 3  | 18.8 | 0   | 0   | 0   | 992 | 19   | 330 | 1.7 |
| 2020 | 7 | 15 | 4  | 18.5 | 0   | 0   | 0   | 993 | 18.6 | 331 | 1.3 |
| 2020 | 7 | 15 | 5  | 18.3 | 0   | 0   | 0   | 993 | 18.4 | 330 | 1   |
| 2020 | 7 | 15 | 6  | 19.3 | 8   | 0   | 8   | 993 | 19.7 | 326 | 1.3 |
| 2020 | 7 | 15 | 7  | 19.3 | 45  | 0   | 45  | 993 | 20.7 | 314 | 1   |
| 2020 | 7 | 15 | 8  | 19.5 | 154 | 7   | 157 | 994 | 21.7 | 288 | 1   |
| 2020 | 7 | 15 | 9  | 19.6 | 147 | 0   | 147 | 993 | 22.6 | 271 | 1.3 |
| 2020 | 7 | 15 | 10 | 20   | 171 | 5   | 175 | 993 | 23.6 | 258 | 1.6 |
| 2020 | 7 | 15 | 11 | 20.3 | 74  | 0   | 74  | 993 | 24.5 | 253 | 2   |
| 2020 | 7 | 15 | 12 | 20.4 | 90  | 0   | 90  | 992 | 24.9 | 254 | 2.3 |
| 2020 | 7 | 15 | 13 | 20.3 | 124 | 0   | 124 | 992 | 24.7 | 261 | 2.5 |
| 2020 | 7 | 15 | 14 | 20.3 | 164 | 6   | 170 | 992 | 24.3 | 269 | 2.7 |
| 2020 | 7 | 15 | 15 | 20   | 151 | 3   | 153 | 992 | 23.8 | 275 | 2.7 |
| 2020 | 7 | 15 | 16 | 19.6 | 153 | 1   | 153 | 992 | 23.1 | 281 | 2.5 |
| 2020 | 7 | 15 | 17 | 19.3 | 85  | 0   | 85  | 992 | 22.4 | 285 | 2.3 |

|      |   |    |    |      |     |     |     |     |      |     |     |
|------|---|----|----|------|-----|-----|-----|-----|------|-----|-----|
| 2020 | 7 | 15 | 18 | 19.4 | 95  | 0   | 95  | 993 | 21.5 | 285 | 1.7 |
| 2020 | 7 | 15 | 19 | 19.4 | 6   | 0   | 6   | 993 | 20.3 | 277 | 0.9 |
| 2020 | 7 | 15 | 20 | 19   | 0   | 0   | 0   | 994 | 19.5 | 260 | 0.7 |
| 2020 | 7 | 15 | 21 | 18.7 | 0   | 0   | 0   | 994 | 19   | 248 | 0.7 |
| 2020 | 7 | 15 | 22 | 18.3 | 0   | 0   | 0   | 995 | 18.7 | 238 | 0.6 |
| 2020 | 7 | 15 | 23 | 18   | 0   | 0   | 0   | 994 | 18.3 | 226 | 0.6 |
| 2020 | 7 | 16 | 0  | 17.9 | 0   | 0   | 0   | 995 | 18.1 | 224 | 0.6 |
| 2020 | 7 | 16 | 1  | 17.7 | 0   | 0   | 0   | 995 | 18   | 229 | 0.6 |
| 2020 | 7 | 16 | 2  | 17.6 | 0   | 0   | 0   | 994 | 18.1 | 242 | 0.5 |
| 2020 | 7 | 16 | 3  | 17.6 | 0   | 0   | 0   | 994 | 18.4 | 304 | 0.1 |
| 2020 | 7 | 16 | 4  | 17.4 | 0   | 0   | 0   | 994 | 18   | 63  | 0.4 |
| 2020 | 7 | 16 | 5  | 17.3 | 0   | 0   | 0   | 995 | 17.7 | 79  | 0.6 |
| 2020 | 7 | 16 | 6  | 18.2 | 15  | 0   | 15  | 995 | 18.9 | 93  | 0.9 |
| 2020 | 7 | 16 | 7  | 18.7 | 75  | 463 | 205 | 995 | 20.3 | 102 | 1   |
| 2020 | 7 | 16 | 8  | 18.9 | 103 | 637 | 405 | 995 | 21.9 | 112 | 0.8 |
| 2020 | 7 | 16 | 9  | 19.2 | 122 | 732 | 598 | 995 | 23.4 | 125 | 0.6 |
| 2020 | 7 | 16 | 10 | 19.7 | 138 | 788 | 765 | 995 | 24.9 | 123 | 0.3 |
| 2020 | 7 | 16 | 11 | 20.1 | 147 | 823 | 889 | 995 | 26   | 36  | 0.2 |
| 2020 | 7 | 16 | 12 | 20.4 | 280 | 15  | 294 | 994 | 26.7 | 348 | 0.5 |
| 2020 | 7 | 16 | 13 | 20.5 | 129 | 877 | 978 | 993 | 27.1 | 327 | 0.7 |
| 2020 | 7 | 16 | 14 | 20.6 | 123 | 870 | 927 | 993 | 27.5 | 318 | 1   |
| 2020 | 7 | 16 | 15 | 20.5 | 121 | 838 | 818 | 993 | 27.5 | 312 | 1.1 |
| 2020 | 7 | 16 | 16 | 20.5 | 117 | 783 | 661 | 993 | 27.3 | 308 | 1.1 |
| 2020 | 7 | 16 | 17 | 21   | 103 | 698 | 472 | 993 | 26.7 | 289 | 0.8 |
| 2020 | 7 | 16 | 18 | 20.9 | 84  | 540 | 266 | 993 | 25.7 | 284 | 0.8 |
| 2020 | 7 | 16 | 19 | 21.5 | 45  | 261 | 82  | 994 | 23.5 | 273 | 0.7 |
| 2020 | 7 | 16 | 20 | 20.9 | 0   | 0   | 0   | 994 | 22   | 269 | 0.8 |
| 2020 | 7 | 16 | 21 | 20.4 | 0   | 0   | 0   | 995 | 21.1 | 272 | 0.8 |
| 2020 | 7 | 16 | 22 | 19.9 | 0   | 0   | 0   | 996 | 20.4 | 279 | 0.7 |
| 2020 | 7 | 16 | 23 | 19.4 | 0   | 0   | 0   | 996 | 19.7 | 290 | 0.7 |
| 2020 | 7 | 17 | 0  | 19.1 | 0   | 0   | 0   | 996 | 19.1 | 306 | 0.7 |
| 2020 | 7 | 17 | 1  | 18.6 | 0   | 0   | 0   | 996 | 18.6 | 326 | 0.7 |
| 2020 | 7 | 17 | 2  | 18.1 | 0   | 0   | 0   | 996 | 18.1 | 347 | 0.8 |
| 2020 | 7 | 17 | 3  | 17.9 | 0   | 0   | 0   | 996 | 17.9 | 4   | 0.8 |
| 2020 | 7 | 17 | 4  | 17.9 | 0   | 0   | 0   | 996 | 17.9 | 17  | 0.8 |
| 2020 | 7 | 17 | 5  | 18.1 | 0   | 0   | 0   | 997 | 18.2 | 28  | 0.6 |
| 2020 | 7 | 17 | 6  | 18.9 | 28  | 98  | 36  | 997 | 19.7 | 59  | 0.4 |
| 2020 | 7 | 17 | 7  | 19.5 | 93  | 375 | 198 | 997 | 21.6 | 71  | 0.5 |
| 2020 | 7 | 17 | 8  | 20.1 | 140 | 536 | 393 | 997 | 23.5 | 67  | 0.6 |
| 2020 | 7 | 17 | 9  | 20.7 | 177 | 622 | 580 | 997 | 25   | 67  | 0.7 |
| 2020 | 7 | 17 | 10 | 21.1 | 204 | 678 | 744 | 997 | 26.2 | 64  | 0.6 |
| 2020 | 7 | 17 | 11 | 21.4 | 218 | 716 | 864 | 996 | 27.1 | 58  | 0.6 |
| 2020 | 7 | 17 | 12 | 21.6 | 176 | 806 | 949 | 996 | 27.9 | 47  | 0.6 |
| 2020 | 7 | 17 | 13 | 21.7 | 181 | 803 | 957 | 995 | 28.4 | 39  | 0.6 |
| 2020 | 7 | 17 | 14 | 21.7 | 179 | 785 | 904 | 995 | 28.5 | 33  | 0.5 |
| 2020 | 7 | 17 | 15 | 21.6 | 182 | 735 | 792 | 995 | 28.4 | 2   | 0.5 |
| 2020 | 7 | 17 | 16 | 21.7 | 181 | 649 | 632 | 995 | 28   | 328 | 0.6 |
| 2020 | 7 | 17 | 17 | 22.3 | 164 | 532 | 444 | 995 | 27   | 295 | 0.8 |
| 2020 | 7 | 17 | 18 | 22.3 | 129 | 173 | 187 | 996 | 25.8 | 294 | 0.8 |
| 2020 | 7 | 17 | 19 | 22.4 | 47  | 73  | 57  | 996 | 24.1 | 261 | 0.3 |

|      |   |    |    |      |     |     |     |     |      |     |     |
|------|---|----|----|------|-----|-----|-----|-----|------|-----|-----|
| 2020 | 7 | 17 | 20 | 21.9 | 0   | 0   | 0   | 997 | 23.1 | 204 | 0.7 |
| 2020 | 7 | 17 | 21 | 21.5 | 0   | 0   | 0   | 997 | 22.2 | 177 | 1   |
| 2020 | 7 | 17 | 22 | 20.8 | 0   | 0   | 0   | 997 | 21.4 | 166 | 1.2 |
| 2020 | 7 | 17 | 23 | 20.1 | 0   | 0   | 0   | 997 | 20.6 | 158 | 1.3 |
| 2020 | 7 | 18 | 0  | 19.3 | 0   | 0   | 0   | 997 | 19.7 | 143 | 1.4 |
| 2020 | 7 | 18 | 1  | 18.6 | 0   | 0   | 0   | 996 | 19   | 129 | 1.2 |
| 2020 | 7 | 18 | 2  | 18.2 | 0   | 0   | 0   | 996 | 18.6 | 126 | 1.1 |
| 2020 | 7 | 18 | 3  | 18   | 0   | 0   | 0   | 996 | 18.3 | 121 | 1.1 |
| 2020 | 7 | 18 | 4  | 17.9 | 0   | 0   | 0   | 996 | 18.1 | 118 | 1.3 |
| 2020 | 7 | 18 | 5  | 17.9 | 0   | 0   | 0   | 996 | 18   | 116 | 1.5 |
| 2020 | 7 | 18 | 6  | 18.1 | 24  | 0   | 24  | 997 | 18.7 | 118 | 2.2 |
| 2020 | 7 | 18 | 7  | 18.3 | 96  | 17  | 101 | 997 | 19.8 | 126 | 2.6 |
| 2020 | 7 | 18 | 8  | 18.7 | 178 | 36  | 195 | 998 | 21.3 | 129 | 2.9 |
| 2020 | 7 | 18 | 9  | 18.8 | 168 | 2   | 169 | 998 | 22   | 126 | 2.9 |
| 2020 | 7 | 18 | 10 | 18.9 | 371 | 103 | 453 | 998 | 22.6 | 125 | 2.8 |
| 2020 | 7 | 18 | 11 | 19.1 | 346 | 27  | 371 | 998 | 23.3 | 125 | 2.2 |
| 2020 | 7 | 18 | 12 | 19.1 | 468 | 95  | 559 | 997 | 23.6 | 126 | 1.9 |
| 2020 | 7 | 18 | 13 | 19.2 | 241 | 13  | 254 | 997 | 23.5 | 126 | 2.6 |
| 2020 | 7 | 18 | 14 | 19.6 | 449 | 251 | 680 | 996 | 23.7 | 128 | 3.2 |
| 2020 | 7 | 18 | 15 | 20   | 283 | 18  | 298 | 996 | 23.7 | 130 | 3.4 |
| 2020 | 7 | 18 | 16 | 20.5 | 262 | 27  | 281 | 996 | 23.6 | 133 | 3.5 |
| 2020 | 7 | 18 | 17 | 21   | 131 | 602 | 447 | 996 | 23.1 | 137 | 3   |
| 2020 | 7 | 18 | 18 | 21.3 | 26  | 0   | 26  | 996 | 22.4 | 133 | 2.1 |
| 2020 | 7 | 18 | 19 | 21.1 | 24  | 0   | 24  | 996 | 21.6 | 123 | 1.8 |
| 2020 | 7 | 18 | 20 | 20.7 | 0   | 0   | 0   | 997 | 21.2 | 120 | 2.3 |
| 2020 | 7 | 18 | 21 | 20.6 | 0   | 0   | 0   | 997 | 21   | 122 | 2.5 |
| 2020 | 7 | 18 | 22 | 20.5 | 0   | 0   | 0   | 997 | 20.7 | 120 | 2.8 |
| 2020 | 7 | 18 | 23 | 20.3 | 0   | 0   | 0   | 996 | 20.5 | 116 | 3.2 |
| 2020 | 7 | 19 | 0  | 20.1 | 0   | 0   | 0   | 996 | 20.3 | 115 | 3.5 |
| 2020 | 7 | 19 | 1  | 20   | 0   | 0   | 0   | 995 | 20.2 | 116 | 3.4 |
| 2020 | 7 | 19 | 2  | 20.1 | 0   | 0   | 0   | 995 | 20.3 | 118 | 3.7 |
| 2020 | 7 | 19 | 3  | 20.2 | 0   | 0   | 0   | 994 | 20.5 | 119 | 4   |
| 2020 | 7 | 19 | 4  | 20.5 | 0   | 0   | 0   | 995 | 20.7 | 118 | 4   |
| 2020 | 7 | 19 | 5  | 20.6 | 0   | 0   | 0   | 995 | 20.9 | 116 | 4.1 |
| 2020 | 7 | 19 | 6  | 21.1 | 25  | 20  | 27  | 995 | 21.5 | 117 | 4.4 |
| 2020 | 7 | 19 | 7  | 22   | 103 | 114 | 134 | 995 | 22.4 | 124 | 4.7 |
| 2020 | 7 | 19 | 8  | 23.1 | 159 | 461 | 375 | 995 | 23.7 | 131 | 4.9 |
| 2020 | 7 | 19 | 9  | 24.2 | 193 | 571 | 562 | 995 | 25.2 | 138 | 5.1 |
| 2020 | 7 | 19 | 10 | 25.1 | 268 | 17  | 282 | 994 | 26.6 | 146 | 5.4 |
| 2020 | 7 | 19 | 11 | 25.6 | 90  | 0   | 90  | 994 | 27.6 | 153 | 5.4 |
| 2020 | 7 | 19 | 12 | 25.9 | 473 | 107 | 576 | 993 | 28.3 | 158 | 5.4 |
| 2020 | 7 | 19 | 13 | 26.3 | 473 | 269 | 732 | 993 | 29.2 | 161 | 5.5 |
| 2020 | 7 | 19 | 14 | 26.3 | 425 | 65  | 485 | 992 | 29.5 | 164 | 5.6 |
| 2020 | 7 | 19 | 15 | 26   | 302 | 23  | 321 | 992 | 29.3 | 168 | 5.7 |
| 2020 | 7 | 19 | 16 | 25.7 | 215 | 11  | 222 | 992 | 28.3 | 169 | 5.3 |
| 2020 | 7 | 19 | 17 | 25.7 | 224 | 119 | 287 | 992 | 27.3 | 163 | 4.9 |
| 2020 | 7 | 19 | 18 | 25.3 | 69  | 0   | 69  | 992 | 26.2 | 160 | 4.9 |
| 2020 | 7 | 19 | 19 | 24.8 | 43  | 3   | 44  | 993 | 25.3 | 160 | 5.1 |
| 2020 | 7 | 19 | 20 | 24.5 | 0   | 0   | 0   | 993 | 24.8 | 161 | 5.3 |
| 2020 | 7 | 19 | 21 | 24.3 | 0   | 0   | 0   | 993 | 24.7 | 163 | 5.5 |



|      |   |    |    |      |     |     |     |      |      |     |     |
|------|---|----|----|------|-----|-----|-----|------|------|-----|-----|
| 2020 | 7 | 19 | 22 | 24.3 | 0   | 0   | 0   | 993  | 24.6 | 166 | 5.4 |
| 2020 | 7 | 19 | 23 | 24.3 | 0   | 0   | 0   | 993  | 24.6 | 170 | 5.2 |
| 2020 | 7 | 20 | 0  | 24.2 | 0   | 0   | 0   | 993  | 24.4 | 173 | 5.1 |
| 2020 | 7 | 20 | 1  | 24.1 | 0   | 0   | 0   | 992  | 24.3 | 176 | 5   |
| 2020 | 7 | 20 | 2  | 24   | 0   | 0   | 0   | 992  | 24.1 | 180 | 4.9 |
| 2020 | 7 | 20 | 3  | 23.8 | 0   | 0   | 0   | 993  | 23.9 | 186 | 4.5 |
| 2020 | 7 | 20 | 4  | 23.7 | 0   | 0   | 0   | 993  | 23.8 | 191 | 4   |
| 2020 | 7 | 20 | 5  | 23.6 | 0   | 0   | 0   | 993  | 23.7 | 195 | 3.5 |
| 2020 | 7 | 20 | 6  | 23.8 | 9   | 0   | 9   | 994  | 23.9 | 201 | 3.4 |
| 2020 | 7 | 20 | 7  | 24.2 | 31  | 0   | 31  | 995  | 24.6 | 217 | 3.6 |
| 2020 | 7 | 20 | 8  | 24.1 | 91  | 0   | 91  | 995  | 25   | 232 | 3.8 |
| 2020 | 7 | 20 | 9  | 23.8 | 166 | 2   | 168 | 995  | 25.7 | 236 | 3.7 |
| 2020 | 7 | 20 | 10 | 23.7 | 376 | 131 | 479 | 996  | 26.7 | 237 | 3.7 |
| 2020 | 7 | 20 | 11 | 23.7 | 277 | 15  | 290 | 996  | 27.5 | 239 | 3.8 |
| 2020 | 7 | 20 | 12 | 23.7 | 372 | 28  | 399 | 996  | 27.8 | 243 | 3.9 |
| 2020 | 7 | 20 | 13 | 23.4 | 487 | 166 | 648 | 995  | 27.5 | 247 | 3.8 |
| 2020 | 7 | 20 | 14 | 23.2 | 406 | 49  | 451 | 995  | 27.2 | 247 | 3.6 |
| 2020 | 7 | 20 | 15 | 23.2 | 384 | 276 | 613 | 995  | 27.1 | 246 | 3.5 |
| 2020 | 7 | 20 | 16 | 23   | 287 | 49  | 321 | 996  | 26.6 | 248 | 3.3 |
| 2020 | 7 | 20 | 17 | 22.7 | 170 | 8   | 174 | 996  | 25.6 | 253 | 2.9 |
| 2020 | 7 | 20 | 18 | 22.5 | 128 | 160 | 181 | 996  | 24.4 | 259 | 2.3 |
| 2020 | 7 | 20 | 19 | 22.5 | 45  | 103 | 59  | 997  | 23.1 | 269 | 1.4 |
| 2020 | 7 | 20 | 20 | 22.2 | 0   | 0   | 0   | 997  | 22.4 | 278 | 1.2 |
| 2020 | 7 | 20 | 21 | 22   | 0   | 0   | 0   | 998  | 22.1 | 279 | 1   |
| 2020 | 7 | 20 | 22 | 21.8 | 0   | 0   | 0   | 998  | 21.8 | 276 | 0.9 |
| 2020 | 7 | 20 | 23 | 21.6 | 0   | 0   | 0   | 999  | 21.6 | 277 | 0.7 |
| 2020 | 7 | 21 | 0  | 21.3 | 0   | 0   | 0   | 999  | 21.3 | 280 | 0.6 |
| 2020 | 7 | 21 | 1  | 21.1 | 0   | 0   | 0   | 998  | 21.1 | 282 | 0.6 |
| 2020 | 7 | 21 | 2  | 20.8 | 0   | 0   | 0   | 998  | 20.8 | 289 | 0.6 |
| 2020 | 7 | 21 | 3  | 20.4 | 0   | 0   | 0   | 998  | 20.5 | 300 | 0.7 |
| 2020 | 7 | 21 | 4  | 20.1 | 0   | 0   | 0   | 999  | 20.2 | 316 | 0.7 |
| 2020 | 7 | 21 | 5  | 20   | 0   | 0   | 0   | 999  | 20   | 335 | 0.7 |
| 2020 | 7 | 21 | 6  | 21   | 19  | 0   | 19  | 1000 | 21.4 | 342 | 1.1 |
| 2020 | 7 | 21 | 7  | 21.4 | 90  | 4   | 92  | 1000 | 22.6 | 341 | 1.4 |
| 2020 | 7 | 21 | 8  | 21.7 | 194 | 139 | 258 | 1000 | 23.9 | 337 | 1.4 |
| 2020 | 7 | 21 | 9  | 22   | 288 | 191 | 411 | 1000 | 25.3 | 330 | 1.4 |
| 2020 | 7 | 21 | 10 | 22.2 | 370 | 105 | 453 | 1000 | 26.6 | 331 | 1.3 |
| 2020 | 7 | 21 | 11 | 22.5 | 153 | 803 | 873 | 1000 | 27.7 | 317 | 1   |
| 2020 | 7 | 21 | 12 | 22.8 | 459 | 312 | 757 | 1000 | 28.4 | 279 | 1.2 |
| 2020 | 7 | 21 | 13 | 22.8 | 409 | 421 | 815 | 1000 | 28.5 | 260 | 1.5 |
| 2020 | 7 | 21 | 14 | 22.9 | 454 | 215 | 652 | 999  | 28.4 | 252 | 1.3 |
| 2020 | 7 | 21 | 15 | 22.8 | 398 | 139 | 513 | 999  | 27.8 | 237 | 1.1 |
| 2020 | 7 | 21 | 16 | 23   | 303 | 278 | 494 | 999  | 27.3 | 208 | 1.1 |
| 2020 | 7 | 21 | 17 | 23.7 | 204 | 306 | 364 | 999  | 26.6 | 194 | 1.2 |
| 2020 | 7 | 21 | 18 | 23.5 | 128 | 104 | 163 | 999  | 25.5 | 194 | 1.4 |
| 2020 | 7 | 21 | 19 | 23.6 | 5   | 0   | 5   | 999  | 24.2 | 193 | 1.1 |
| 2020 | 7 | 21 | 20 | 23.3 | 0   | 0   | 0   | 999  | 23.5 | 194 | 1   |
| 2020 | 7 | 21 | 21 | 23.2 | 0   | 0   | 0   | 1000 | 23.2 | 194 | 0.8 |
| 2020 | 7 | 21 | 22 | 23   | 0   | 0   | 0   | 1000 | 23   | 183 | 0.6 |
| 2020 | 7 | 21 | 23 | 22.7 | 0   | 0   | 0   | 1000 | 22.7 | 158 | 0.6 |

|      |   |    |    |      |     |     |     |     |      |     |     |
|------|---|----|----|------|-----|-----|-----|-----|------|-----|-----|
| 2020 | 7 | 22 | 0  | 22.4 | 0   | 0   | 0   | 999 | 22.4 | 147 | 0.8 |
| 2020 | 7 | 22 | 1  | 22.2 | 0   | 0   | 0   | 999 | 22.2 | 146 | 0.9 |
| 2020 | 7 | 22 | 2  | 22.1 | 0   | 0   | 0   | 998 | 22.1 | 145 | 1.2 |
| 2020 | 7 | 22 | 3  | 22   | 0   | 0   | 0   | 998 | 22   | 149 | 1.4 |
| 2020 | 7 | 22 | 4  | 21.8 | 0   | 0   | 0   | 997 | 21.9 | 161 | 1.5 |
| 2020 | 7 | 22 | 5  | 21.8 | 0   | 0   | 0   | 998 | 21.8 | 171 | 1.5 |
| 2020 | 7 | 22 | 6  | 22.1 | 20  | 0   | 20  | 998 | 22.3 | 188 | 1.8 |
| 2020 | 7 | 22 | 7  | 22.6 | 97  | 35  | 106 | 998 | 22.9 | 203 | 1.8 |
| 2020 | 7 | 22 | 8  | 23.2 | 137 | 0   | 137 | 998 | 23.6 | 208 | 1.6 |
| 2020 | 7 | 22 | 9  | 23.8 | 162 | 1   | 163 | 998 | 24.3 | 219 | 1.6 |
| 2020 | 7 | 22 | 10 | 24.3 | 157 | 3   | 160 | 998 | 25.5 | 236 | 2.3 |
| 2020 | 7 | 22 | 11 | 23.9 | 146 | 3   | 148 | 998 | 26.1 | 243 | 2.7 |
| 2020 | 7 | 22 | 12 | 23.4 | 249 | 13  | 262 | 997 | 25.7 | 246 | 2.4 |
| 2020 | 7 | 22 | 13 | 23.2 | 276 | 15  | 291 | 997 | 25.5 | 256 | 2.4 |
| 2020 | 7 | 22 | 14 | 23.1 | 145 | 3   | 148 | 997 | 25.9 | 270 | 2.6 |
| 2020 | 7 | 22 | 15 | 22.6 | 78  | 0   | 78  | 997 | 25.4 | 278 | 2.8 |
| 2020 | 7 | 22 | 16 | 22.4 | 253 | 24  | 270 | 998 | 24.2 | 280 | 2.5 |
| 2020 | 7 | 22 | 17 | 22.3 | 119 | 0   | 119 | 998 | 23.4 | 285 | 1.8 |
| 2020 | 7 | 22 | 18 | 22.3 | 112 | 9   | 115 | 997 | 23   | 299 | 1.1 |
| 2020 | 7 | 22 | 19 | 21.9 | 25  | 0   | 25  | 997 | 22.2 | 305 | 0.5 |
| 2020 | 7 | 22 | 20 | 21.4 | 0   | 0   | 0   | 997 | 22   | 285 | 0.4 |
| 2020 | 7 | 22 | 21 | 21.2 | 0   | 0   | 0   | 997 | 21.9 | 201 | 0.3 |
| 2020 | 7 | 22 | 22 | 21.1 | 0   | 0   | 0   | 997 | 21.4 | 169 | 0.6 |
| 2020 | 7 | 22 | 23 | 20.9 | 0   | 0   | 0   | 997 | 21   | 165 | 0.7 |
| 2020 | 7 | 23 | 0  | 20.7 | 0   | 0   | 0   | 997 | 20.7 | 160 | 0.7 |
| 2020 | 7 | 23 | 1  | 20.6 | 0   | 0   | 0   | 997 | 20.7 | 151 | 0.7 |
| 2020 | 7 | 23 | 2  | 20.6 | 0   | 0   | 0   | 996 | 20.7 | 135 | 0.6 |
| 2020 | 7 | 23 | 3  | 20.6 | 0   | 0   | 0   | 997 | 20.7 | 122 | 0.8 |
| 2020 | 7 | 23 | 4  | 20.7 | 0   | 0   | 0   | 997 | 20.8 | 118 | 1.2 |
| 2020 | 7 | 23 | 5  | 20.9 | 0   | 0   | 0   | 997 | 21   | 120 | 1.9 |
| 2020 | 7 | 23 | 6  | 21.3 | 8   | 0   | 8   | 997 | 21.5 | 123 | 2.6 |
| 2020 | 7 | 23 | 7  | 21.8 | 29  | 0   | 29  | 997 | 22.1 | 126 | 3.1 |
| 2020 | 7 | 23 | 8  | 22.5 | 58  | 0   | 58  | 997 | 22.7 | 127 | 3.4 |
| 2020 | 7 | 23 | 9  | 23.2 | 35  | 0   | 35  | 996 | 23.6 | 130 | 3.8 |
| 2020 | 7 | 23 | 10 | 23.8 | 55  | 0   | 55  | 996 | 24.4 | 129 | 4.7 |
| 2020 | 7 | 23 | 11 | 23.9 | 90  | 0   | 90  | 995 | 24.8 | 129 | 5.7 |
| 2020 | 7 | 23 | 12 | 23.8 | 219 | 11  | 230 | 994 | 25   | 132 | 6.4 |
| 2020 | 7 | 23 | 13 | 23.6 | 94  | 0   | 94  | 992 | 24.9 | 134 | 7.1 |
| 2020 | 7 | 23 | 14 | 23.7 | 137 | 1   | 138 | 991 | 24.9 | 137 | 7.6 |
| 2020 | 7 | 23 | 15 | 23.9 | 251 | 13  | 262 | 990 | 24.8 | 142 | 7.4 |
| 2020 | 7 | 23 | 16 | 24.2 | 58  | 0   | 58  | 990 | 24.8 | 150 | 6.4 |
| 2020 | 7 | 23 | 17 | 24.4 | 37  | 0   | 37  | 989 | 24.8 | 158 | 5.5 |
| 2020 | 7 | 23 | 18 | 24.5 | 142 | 254 | 225 | 989 | 24.7 | 165 | 4.9 |
| 2020 | 7 | 23 | 19 | 24.3 | 42  | 19  | 44  | 988 | 24.4 | 161 | 4.6 |
| 2020 | 7 | 23 | 20 | 24.1 | 0   | 0   | 0   | 987 | 24.2 | 158 | 4.4 |
| 2020 | 7 | 23 | 21 | 23.9 | 0   | 0   | 0   | 987 | 24   | 176 | 4.5 |
| 2020 | 7 | 23 | 22 | 22.7 | 0   | 0   | 0   | 986 | 23.1 | 200 | 5.2 |
| 2020 | 7 | 23 | 23 | 21.4 | 0   | 0   | 0   | 986 | 21.7 | 191 | 5   |
| 2020 | 7 | 24 | 0  | 21.1 | 0   | 0   | 0   | 985 | 21.4 | 184 | 5.3 |
| 2020 | 7 | 24 | 1  | 21.1 | 0   | 0   | 0   | 984 | 21.4 | 184 | 5.7 |

|      |   |    |    |      |     |     |     |     |      |     |     |
|------|---|----|----|------|-----|-----|-----|-----|------|-----|-----|
| 2020 | 7 | 24 | 2  | 21.2 | 0   | 0   | 0   | 983 | 21.5 | 188 | 5.7 |
| 2020 | 7 | 24 | 3  | 21.3 | 0   | 0   | 0   | 983 | 21.5 | 198 | 5.3 |
| 2020 | 7 | 24 | 4  | 21.3 | 0   | 0   | 0   | 983 | 21.5 | 209 | 4.7 |
| 2020 | 7 | 24 | 5  | 21.2 | 0   | 0   | 0   | 984 | 21.4 | 215 | 4.3 |
| 2020 | 7 | 24 | 6  | 21.1 | 10  | 0   | 10  | 984 | 21.4 | 214 | 4.4 |
| 2020 | 7 | 24 | 7  | 21.3 | 61  | 0   | 61  | 984 | 21.8 | 214 | 4.6 |
| 2020 | 7 | 24 | 8  | 21.3 | 41  | 0   | 41  | 984 | 22.3 | 217 | 4.8 |
| 2020 | 7 | 24 | 9  | 21.4 | 75  | 0   | 75  | 984 | 23   | 216 | 4.9 |
| 2020 | 7 | 24 | 10 | 21.5 | 136 | 0   | 136 | 984 | 23.7 | 216 | 5   |
| 2020 | 7 | 24 | 11 | 21.5 | 193 | 9   | 201 | 984 | 24.1 | 215 | 5   |
| 2020 | 7 | 24 | 12 | 21.4 | 332 | 20  | 351 | 984 | 24.3 | 212 | 4.9 |
| 2020 | 7 | 24 | 13 | 21.5 | 110 | 0   | 110 | 984 | 24.4 | 207 | 4.5 |
| 2020 | 7 | 24 | 14 | 21.7 | 165 | 6   | 171 | 984 | 24.6 | 203 | 3.9 |
| 2020 | 7 | 24 | 15 | 21.9 | 264 | 15  | 277 | 983 | 24.7 | 202 | 3.1 |
| 2020 | 7 | 24 | 16 | 22   | 257 | 26  | 275 | 983 | 24.7 | 211 | 2.2 |
| 2020 | 7 | 24 | 17 | 22   | 148 | 0   | 148 | 984 | 24.4 | 246 | 1.4 |
| 2020 | 7 | 24 | 18 | 22.3 | 24  | 0   | 24  | 984 | 23.7 | 289 | 1.4 |
| 2020 | 7 | 24 | 19 | 22.1 | 42  | 196 | 67  | 984 | 22.4 | 301 | 1.2 |
| 2020 | 7 | 24 | 20 | 21.7 | 0   | 0   | 0   | 985 | 21.8 | 298 | 1.7 |
| 2020 | 7 | 24 | 21 | 21.5 | 0   | 0   | 0   | 986 | 21.6 | 294 | 2.1 |
| 2020 | 7 | 24 | 22 | 21.3 | 0   | 0   | 0   | 986 | 21.4 | 290 | 2.3 |
| 2020 | 7 | 24 | 23 | 21.2 | 0   | 0   | 0   | 987 | 21.2 | 287 | 2.4 |
| 2020 | 7 | 25 | 0  | 21   | 0   | 0   | 0   | 987 | 21.1 | 283 | 2.6 |
| 2020 | 7 | 25 | 1  | 20.9 | 0   | 0   | 0   | 987 | 21   | 281 | 2.7 |
| 2020 | 7 | 25 | 2  | 20.8 | 0   | 0   | 0   | 987 | 20.9 | 278 | 2.6 |
| 2020 | 7 | 25 | 3  | 20.7 | 0   | 0   | 0   | 987 | 20.7 | 276 | 2.4 |
| 2020 | 7 | 25 | 4  | 20.5 | 0   | 0   | 0   | 987 | 20.5 | 276 | 2   |
| 2020 | 7 | 25 | 5  | 20.4 | 0   | 0   | 0   | 988 | 20.4 | 275 | 1.7 |
| 2020 | 7 | 25 | 6  | 21   | 9   | 0   | 9   | 988 | 21.2 | 277 | 2   |
| 2020 | 7 | 25 | 7  | 21.5 | 53  | 0   | 53  | 989 | 22.2 | 283 | 2.2 |
| 2020 | 7 | 25 | 8  | 21.8 | 101 | 607 | 380 | 989 | 23.2 | 296 | 2.6 |
| 2020 | 7 | 25 | 9  | 21.8 | 136 | 0   | 136 | 990 | 24.1 | 303 | 2.8 |
| 2020 | 7 | 25 | 10 | 21.9 | 190 | 7   | 195 | 990 | 25.1 | 308 | 2.8 |
| 2020 | 7 | 25 | 11 | 22   | 73  | 0   | 73  | 989 | 26   | 302 | 2.6 |
| 2020 | 7 | 25 | 12 | 22.1 | 479 | 195 | 665 | 989 | 26.6 | 295 | 2.8 |
| 2020 | 7 | 25 | 13 | 22.2 | 240 | 13  | 252 | 989 | 26.8 | 293 | 3.1 |
| 2020 | 7 | 25 | 14 | 22.2 | 92  | 0   | 92  | 990 | 26.5 | 294 | 3.5 |
| 2020 | 7 | 25 | 15 | 22.1 | 86  | 0   | 86  | 990 | 25.8 | 298 | 3.7 |
| 2020 | 7 | 25 | 16 | 21.9 | 124 | 0   | 124 | 990 | 25.2 | 301 | 3.7 |
| 2020 | 7 | 25 | 17 | 21.7 | 187 | 23  | 198 | 991 | 24.3 | 303 | 3.2 |
| 2020 | 7 | 25 | 18 | 21.6 | 93  | 456 | 241 | 991 | 23.4 | 300 | 2.4 |
| 2020 | 7 | 25 | 19 | 21.5 | 44  | 169 | 65  | 992 | 22.1 | 291 | 1.4 |
| 2020 | 7 | 25 | 20 | 21.1 | 0   | 0   | 0   | 992 | 21.2 | 281 | 1.3 |
| 2020 | 7 | 25 | 21 | 20.7 | 0   | 0   | 0   | 993 | 20.7 | 272 | 1.2 |
| 2020 | 7 | 25 | 22 | 20.5 | 0   | 0   | 0   | 993 | 20.5 | 261 | 1.2 |
| 2020 | 7 | 25 | 23 | 20.3 | 0   | 0   | 0   | 994 | 20.3 | 250 | 1.1 |
| 2020 | 7 | 26 | 0  | 20   | 0   | 0   | 0   | 994 | 20   | 239 | 1.1 |
| 2020 | 7 | 26 | 1  | 19.7 | 0   | 0   | 0   | 994 | 19.7 | 229 | 1.1 |
| 2020 | 7 | 26 | 2  | 19.5 | 0   | 0   | 0   | 994 | 19.5 | 223 | 1.1 |
| 2020 | 7 | 26 | 3  | 19.3 | 0   | 0   | 0   | 994 | 19.3 | 219 | 1   |

|      |   |    |    |      |     |     |     |     |      |     |     |
|------|---|----|----|------|-----|-----|-----|-----|------|-----|-----|
| 2020 | 7 | 26 | 4  | 19   | 0   | 0   | 0   | 994 | 19   | 215 | 0.9 |
| 2020 | 7 | 26 | 5  | 18.9 | 0   | 0   | 0   | 994 | 18.9 | 205 | 0.8 |
| 2020 | 7 | 26 | 6  | 19.9 | 22  | 116 | 29  | 995 | 20.4 | 184 | 1.5 |
| 2020 | 7 | 26 | 7  | 20.4 | 97  | 76  | 117 | 995 | 21.7 | 187 | 2   |
| 2020 | 7 | 26 | 8  | 20.8 | 167 | 26  | 179 | 995 | 23.1 | 192 | 2.1 |
| 2020 | 7 | 26 | 9  | 21.1 | 283 | 110 | 353 | 995 | 24.3 | 188 | 2.2 |
| 2020 | 7 | 26 | 10 | 21.4 | 117 | 813 | 755 | 995 | 25.4 | 180 | 2.4 |
| 2020 | 7 | 26 | 11 | 21.6 | 439 | 134 | 558 | 995 | 26   | 175 | 2.6 |
| 2020 | 7 | 26 | 12 | 21.8 | 125 | 866 | 949 | 995 | 26.6 | 175 | 2.7 |
| 2020 | 7 | 26 | 13 | 21.9 | 130 | 862 | 957 | 995 | 26.8 | 174 | 2.6 |
| 2020 | 7 | 26 | 14 | 21.5 | 401 | 48  | 445 | 995 | 26.1 | 173 | 2.4 |
| 2020 | 7 | 26 | 15 | 21.4 | 68  | 0   | 68  | 995 | 25.4 | 171 | 2   |
| 2020 | 7 | 26 | 16 | 21.5 | 308 | 229 | 465 | 995 | 25   | 164 | 1.8 |
| 2020 | 7 | 26 | 17 | 21.6 | 215 | 215 | 326 | 995 | 24.5 | 156 | 1.5 |
| 2020 | 7 | 26 | 18 | 21.6 | 76  | 0   | 76  | 995 | 23.7 | 155 | 1.1 |
| 2020 | 7 | 26 | 19 | 21.5 | 39  | 5   | 39  | 995 | 22.4 | 158 | 0.6 |
| 2020 | 7 | 26 | 20 | 20.9 | 0   | 0   | 0   | 996 | 21.7 | 162 | 0.6 |
| 2020 | 7 | 26 | 21 | 20.7 | 0   | 0   | 0   | 996 | 21.4 | 160 | 0.5 |
| 2020 | 7 | 26 | 22 | 20.2 | 0   | 0   | 0   | 996 | 21   | 148 | 0.5 |
| 2020 | 7 | 26 | 23 | 19.9 | 0   | 0   | 0   | 996 | 20.2 | 134 | 0.6 |
| 2020 | 7 | 27 | 0  | 19.7 | 0   | 0   | 0   | 995 | 19.7 | 130 | 0.8 |
| 2020 | 7 | 27 | 1  | 19.6 | 0   | 0   | 0   | 995 | 19.6 | 124 | 1   |
| 2020 | 7 | 27 | 2  | 19.4 | 0   | 0   | 0   | 995 | 19.4 | 120 | 0.9 |
| 2020 | 7 | 27 | 3  | 19.3 | 0   | 0   | 0   | 995 | 19.3 | 120 | 0.8 |
| 2020 | 7 | 27 | 4  | 19.5 | 0   | 0   | 0   | 995 | 19.5 | 120 | 0.8 |
| 2020 | 7 | 27 | 5  | 19.6 | 0   | 0   | 0   | 995 | 19.6 | 118 | 0.8 |
| 2020 | 7 | 27 | 6  | 20.5 | 21  | 13  | 21  | 996 | 20.5 | 120 | 0.9 |
| 2020 | 7 | 27 | 7  | 21.5 | 96  | 144 | 133 | 996 | 22.7 | 130 | 1.8 |
| 2020 | 7 | 27 | 8  | 21.8 | 172 | 35  | 187 | 996 | 23.6 | 141 | 1.9 |
| 2020 | 7 | 27 | 9  | 22   | 220 | 17  | 231 | 996 | 24.4 | 143 | 2   |
| 2020 | 7 | 27 | 10 | 22.1 | 290 | 24  | 309 | 996 | 24.8 | 137 | 2.2 |
| 2020 | 7 | 27 | 11 | 22   | 430 | 248 | 651 | 996 | 24.7 | 134 | 2.3 |
| 2020 | 7 | 27 | 12 | 21.9 | 473 | 122 | 589 | 996 | 24.4 | 127 | 2.4 |
| 2020 | 7 | 27 | 13 | 21.9 | 354 | 24  | 377 | 996 | 24.2 | 113 | 2.3 |
| 2020 | 7 | 27 | 14 | 21.9 | 286 | 16  | 301 | 996 | 24.2 | 97  | 2.3 |
| 2020 | 7 | 27 | 15 | 22   | 376 | 76  | 438 | 995 | 24.1 | 84  | 2.2 |
| 2020 | 7 | 27 | 16 | 22.2 | 46  | 0   | 46  | 995 | 23.9 | 74  | 2.2 |
| 2020 | 7 | 27 | 17 | 22.5 | 25  | 0   | 25  | 994 | 23.8 | 69  | 2.6 |
| 2020 | 7 | 27 | 18 | 22.8 | 119 | 43  | 132 | 994 | 23.4 | 69  | 1.9 |
| 2020 | 7 | 27 | 19 | 22.5 | 6   | 0   | 6   | 994 | 22.6 | 68  | 1.1 |
| 2020 | 7 | 27 | 20 | 22.3 | 0   | 0   | 0   | 994 | 22.4 | 74  | 0.9 |
| 2020 | 7 | 27 | 21 | 22.2 | 0   | 0   | 0   | 995 | 22.2 | 92  | 0.7 |
| 2020 | 7 | 27 | 22 | 22.2 | 0   | 0   | 0   | 995 | 22.2 | 124 | 0.5 |
| 2020 | 7 | 27 | 23 | 22.2 | 0   | 0   | 0   | 995 | 22.2 | 166 | 0.6 |
| 2020 | 7 | 28 | 0  | 22.1 | 0   | 0   | 0   | 995 | 22.1 | 182 | 0.8 |
| 2020 | 7 | 28 | 1  | 22.1 | 0   | 0   | 0   | 995 | 22.1 | 185 | 1.1 |
| 2020 | 7 | 28 | 2  | 22.5 | 0   | 0   | 0   | 995 | 22.5 | 191 | 1.8 |
| 2020 | 7 | 28 | 3  | 22.8 | 0   | 0   | 0   | 995 | 22.8 | 197 | 2.6 |
| 2020 | 7 | 28 | 4  | 22.8 | 0   | 0   | 0   | 995 | 22.9 | 210 | 2.5 |
| 2020 | 7 | 28 | 5  | 22.8 | 0   | 0   | 0   | 996 | 22.8 | 232 | 2.2 |

|      |   |    |    |      |     |     |     |      |      |     |     |
|------|---|----|----|------|-----|-----|-----|------|------|-----|-----|
| 2020 | 7 | 28 | 6  | 23   | 8   | 4   | 8   | 997  | 23   | 241 | 1.6 |
| 2020 | 7 | 28 | 7  | 23.3 | 86  | 3   | 87  | 998  | 23.7 | 237 | 1.6 |
| 2020 | 7 | 28 | 8  | 23.6 | 186 | 92  | 228 | 998  | 24.6 | 234 | 1.5 |
| 2020 | 7 | 28 | 9  | 24.1 | 280 | 100 | 343 | 998  | 25.7 | 227 | 1.4 |
| 2020 | 7 | 28 | 10 | 24.5 | 360 | 90  | 430 | 998  | 26.7 | 211 | 1.6 |
| 2020 | 7 | 28 | 11 | 25   | 318 | 21  | 336 | 998  | 27.2 | 196 | 2   |
| 2020 | 7 | 28 | 12 | 25.4 | 426 | 53  | 476 | 998  | 27.5 | 190 | 2.3 |
| 2020 | 7 | 28 | 13 | 25.7 | 454 | 74  | 525 | 998  | 27.5 | 187 | 2.6 |
| 2020 | 7 | 28 | 14 | 25.9 | 254 | 13  | 265 | 998  | 27.5 | 182 | 2.7 |
| 2020 | 7 | 28 | 15 | 26   | 373 | 72  | 432 | 997  | 27.7 | 177 | 2.8 |
| 2020 | 7 | 28 | 16 | 26   | 55  | 0   | 55  | 997  | 27.7 | 173 | 2.8 |
| 2020 | 7 | 28 | 17 | 25.9 | 222 | 349 | 401 | 998  | 27.1 | 167 | 2.5 |
| 2020 | 7 | 28 | 18 | 25.8 | 90  | 0   | 90  | 998  | 26.2 | 156 | 1.9 |
| 2020 | 7 | 28 | 19 | 25   | 21  | 0   | 21  | 998  | 25   | 149 | 1.5 |
| 2020 | 7 | 28 | 20 | 24.6 | 0   | 0   | 0   | 998  | 24.6 | 145 | 1.6 |
| 2020 | 7 | 28 | 21 | 24.3 | 0   | 0   | 0   | 999  | 24.3 | 145 | 1.5 |
| 2020 | 7 | 28 | 22 | 24   | 0   | 0   | 0   | 999  | 24   | 147 | 1.4 |
| 2020 | 7 | 28 | 23 | 23.8 | 0   | 0   | 0   | 999  | 23.8 | 150 | 1.2 |
| 2020 | 7 | 29 | 0  | 23.7 | 0   | 0   | 0   | 999  | 23.7 | 159 | 1.2 |
| 2020 | 7 | 29 | 1  | 23.6 | 0   | 0   | 0   | 999  | 23.6 | 172 | 1.1 |
| 2020 | 7 | 29 | 2  | 23.5 | 0   | 0   | 0   | 999  | 23.5 | 180 | 1.1 |
| 2020 | 7 | 29 | 3  | 23.4 | 0   | 0   | 0   | 999  | 23.4 | 186 | 1.1 |
| 2020 | 7 | 29 | 4  | 23.3 | 0   | 0   | 0   | 999  | 23.3 | 188 | 1.2 |
| 2020 | 7 | 29 | 5  | 23.2 | 0   | 0   | 0   | 1000 | 23.2 | 189 | 1.2 |
| 2020 | 7 | 29 | 6  | 23.9 | 12  | 0   | 12  | 1000 | 23.9 | 181 | 1.5 |
| 2020 | 7 | 29 | 7  | 24.4 | 72  | 0   | 72  | 1000 | 24.6 | 173 | 2.1 |
| 2020 | 7 | 29 | 8  | 24.7 | 146 | 5   | 148 | 1001 | 25.1 | 176 | 2.3 |
| 2020 | 7 | 29 | 9  | 24.9 | 170 | 3   | 171 | 1001 | 25.7 | 181 | 2.5 |
| 2020 | 7 | 29 | 10 | 25.1 | 199 | 7   | 204 | 1001 | 26.3 | 185 | 2.7 |
| 2020 | 7 | 29 | 11 | 25.3 | 284 | 16  | 298 | 1000 | 26.9 | 189 | 2.9 |
| 2020 | 7 | 29 | 12 | 25.5 | 287 | 15  | 301 | 1000 | 27.4 | 193 | 3.1 |
| 2020 | 7 | 29 | 13 | 25.4 | 440 | 61  | 498 | 1000 | 27.5 | 195 | 3.1 |
| 2020 | 7 | 29 | 14 | 25.2 | 107 | 0   | 107 | 1000 | 27.4 | 195 | 3   |
| 2020 | 7 | 29 | 15 | 25.1 | 394 | 148 | 515 | 1000 | 27.3 | 194 | 2.9 |
| 2020 | 7 | 29 | 16 | 25   | 281 | 47  | 313 | 1000 | 27.1 | 190 | 2.6 |
| 2020 | 7 | 29 | 17 | 25.1 | 216 | 126 | 280 | 1000 | 26.6 | 182 | 2.1 |
| 2020 | 7 | 29 | 18 | 25.2 | 13  | 0   | 13  | 1000 | 25.9 | 168 | 1.5 |
| 2020 | 7 | 29 | 19 | 24.7 | 44  | 104 | 56  | 1001 | 24.7 | 158 | 0.9 |
| 2020 | 7 | 29 | 20 | 24.1 | 0   | 0   | 0   | 1001 | 24.1 | 154 | 1   |
| 2020 | 7 | 29 | 21 | 23.9 | 0   | 0   | 0   | 1001 | 23.9 | 150 | 1.2 |
| 2020 | 7 | 29 | 22 | 23.9 | 0   | 0   | 0   | 1001 | 23.9 | 149 | 1.4 |
| 2020 | 7 | 29 | 23 | 23.8 | 0   | 0   | 0   | 1001 | 23.8 | 152 | 1.6 |
| 2020 | 7 | 30 | 0  | 23.7 | 0   | 0   | 0   | 1001 | 23.7 | 160 | 1.4 |
| 2020 | 7 | 30 | 1  | 23.6 | 0   | 0   | 0   | 1001 | 23.6 | 171 | 1.2 |
| 2020 | 7 | 30 | 2  | 23.6 | 0   | 0   | 0   | 1001 | 23.6 | 187 | 1.1 |
| 2020 | 7 | 30 | 3  | 23.6 | 0   | 0   | 0   | 1001 | 23.6 | 200 | 1.1 |
| 2020 | 7 | 30 | 4  | 23.4 | 0   | 0   | 0   | 1002 | 23.4 | 207 | 1.1 |
| 2020 | 7 | 30 | 5  | 23.3 | 0   | 0   | 0   | 1002 | 23.3 | 213 | 1.1 |
| 2020 | 7 | 30 | 6  | 23.9 | 7   | 0   | 7   | 1002 | 23.9 | 213 | 1.2 |
| 2020 | 7 | 30 | 7  | 24.7 | 82  | 0   | 82  | 1003 | 24.8 | 212 | 1.7 |

|      |   |    |    |      |     |     |     |      |      |     |     |
|------|---|----|----|------|-----|-----|-----|------|------|-----|-----|
| 2020 | 7 | 30 | 8  | 25.2 | 186 | 119 | 240 | 1003 | 25.5 | 218 | 1.9 |
| 2020 | 7 | 30 | 9  | 25.6 | 282 | 139 | 370 | 1003 | 26.6 | 238 | 2.2 |
| 2020 | 7 | 30 | 10 | 25.6 | 355 | 82  | 419 | 1003 | 27.2 | 246 | 2.3 |
| 2020 | 7 | 30 | 11 | 25.5 | 138 | 817 | 863 | 1002 | 27.5 | 245 | 2.2 |
| 2020 | 7 | 30 | 12 | 25.5 | 423 | 363 | 767 | 1002 | 27.6 | 243 | 2.2 |
| 2020 | 7 | 30 | 13 | 25.5 | 474 | 116 | 585 | 1002 | 27.7 | 239 | 2.1 |
| 2020 | 7 | 30 | 14 | 25.5 | 405 | 53  | 453 | 1002 | 27.6 | 231 | 1.9 |
| 2020 | 7 | 30 | 15 | 25.5 | 386 | 107 | 474 | 1001 | 27.5 | 222 | 1.9 |
| 2020 | 7 | 30 | 16 | 25.6 | 306 | 105 | 378 | 1001 | 27.1 | 220 | 1.8 |
| 2020 | 7 | 30 | 17 | 25.6 | 86  | 0   | 86  | 1001 | 26.7 | 224 | 1.5 |
| 2020 | 7 | 30 | 18 | 25.5 | 117 | 198 | 179 | 1001 | 26   | 227 | 1.1 |
| 2020 | 7 | 30 | 19 | 24.9 | 17  | 0   | 17  | 1001 | 24.9 | 226 | 0.7 |
| 2020 | 7 | 30 | 20 | 24.3 | 0   | 0   | 0   | 1002 | 24.3 | 225 | 0.7 |
| 2020 | 7 | 30 | 21 | 24   | 0   | 0   | 0   | 1002 | 24   | 221 | 0.7 |
| 2020 | 7 | 30 | 22 | 23.8 | 0   | 0   | 0   | 1002 | 23.8 | 214 | 0.7 |
| 2020 | 7 | 30 | 23 | 23.6 | 0   | 0   | 0   | 1002 | 23.6 | 208 | 0.7 |
| 2020 | 7 | 31 | 0  | 23.4 | 0   | 0   | 0   | 1002 | 23.4 | 209 | 0.7 |
| 2020 | 7 | 31 | 1  | 23.2 | 0   | 0   | 0   | 1001 | 23.2 | 212 | 0.7 |
| 2020 | 7 | 31 | 2  | 23   | 0   | 0   | 0   | 1001 | 23   | 217 | 0.7 |
| 2020 | 7 | 31 | 3  | 22.9 | 0   | 0   | 0   | 1001 | 22.9 | 222 | 0.7 |
| 2020 | 7 | 31 | 4  | 22.8 | 0   | 0   | 0   | 1002 | 22.8 | 220 | 0.7 |
| 2020 | 7 | 31 | 5  | 22.7 | 0   | 0   | 0   | 1002 | 22.8 | 212 | 0.7 |
| 2020 | 7 | 31 | 6  | 23.4 | 11  | 0   | 11  | 1002 | 23.4 | 200 | 0.5 |
| 2020 | 7 | 31 | 7  | 24.3 | 62  | 0   | 62  | 1003 | 24.5 | 195 | 0.9 |
| 2020 | 7 | 31 | 8  | 24.7 | 179 | 232 | 283 | 1003 | 25.9 | 213 | 1.1 |
| 2020 | 7 | 31 | 9  | 24.7 | 280 | 120 | 355 | 1003 | 27.2 | 222 | 1.2 |
| 2020 | 7 | 31 | 10 | 24.5 | 141 | 766 | 736 | 1003 | 27.8 | 218 | 1.4 |
| 2020 | 7 | 31 | 11 | 24.4 | 156 | 794 | 859 | 1002 | 28   | 209 | 1.6 |
| 2020 | 7 | 31 | 12 | 24.6 | 473 | 202 | 663 | 1002 | 28.3 | 205 | 1.7 |
| 2020 | 7 | 31 | 13 | 24.8 | 421 | 373 | 777 | 1001 | 28.6 | 210 | 1.8 |
| 2020 | 7 | 31 | 14 | 24.9 | 451 | 170 | 606 | 1001 | 28.8 | 221 | 1.8 |
| 2020 | 7 | 31 | 15 | 24.9 | 323 | 421 | 666 | 1001 | 28.8 | 234 | 1.7 |
| 2020 | 7 | 31 | 16 | 25.3 | 294 | 281 | 484 | 1001 | 28.6 | 243 | 1.4 |
| 2020 | 7 | 31 | 17 | 25.1 | 172 | 422 | 385 | 1001 | 28.2 | 249 | 1.2 |
| 2020 | 7 | 31 | 18 | 25.2 | 83  | 0   | 83  | 1001 | 27.1 | 248 | 0.9 |
| 2020 | 7 | 31 | 19 | 24.5 | 35  | 20  | 38  | 1001 | 25.4 | 247 | 0.8 |
| 2020 | 7 | 31 | 20 | 24   | 0   | 0   | 0   | 1001 | 24.7 | 243 | 0.8 |
| 2020 | 7 | 31 | 21 | 23.6 | 0   | 0   | 0   | 1001 | 24.3 | 228 | 0.7 |
| 2020 | 7 | 31 | 22 | 23.3 | 0   | 0   | 0   | 1001 | 23.8 | 209 | 0.7 |
| 2020 | 7 | 31 | 23 | 23   | 0   | 0   | 0   | 1001 | 23.2 | 200 | 0.7 |
| 2020 | 8 | 1  | 0  | 22.8 | 0   | 0   | 0   | 1001 | 22.9 | 200 | 0.8 |
| 2020 | 8 | 1  | 1  | 22.6 | 0   | 0   | 0   | 1001 | 22.6 | 203 | 0.7 |
| 2020 | 8 | 1  | 2  | 22.5 | 0   | 0   | 0   | 1001 | 22.5 | 198 | 0.6 |
| 2020 | 8 | 1  | 3  | 22.4 | 0   | 0   | 0   | 1000 | 22.5 | 177 | 0.6 |
| 2020 | 8 | 1  | 4  | 22.2 | 0   | 0   | 0   | 1000 | 22.3 | 160 | 0.7 |
| 2020 | 8 | 1  | 5  | 22   | 0   | 0   | 0   | 1001 | 22   | 155 | 0.7 |
| 2020 | 8 | 1  | 6  | 22.7 | 15  | 0   | 15  | 1001 | 22.9 | 153 | 1   |
| 2020 | 8 | 1  | 7  | 23.3 | 92  | 76  | 111 | 1001 | 24.2 | 155 | 1.9 |
| 2020 | 8 | 1  | 8  | 24.1 | 183 | 180 | 263 | 1001 | 25.8 | 178 | 2.3 |
| 2020 | 8 | 1  | 9  | 24.3 | 213 | 470 | 508 | 1001 | 27.1 | 187 | 2.6 |

|      |   |   |    |      |     |     |     |      |      |     |     |
|------|---|---|----|------|-----|-----|-----|------|------|-----|-----|
| 2020 | 8 | 1 | 10 | 24.3 | 138 | 776 | 741 | 1000 | 28   | 187 | 2.8 |
| 2020 | 8 | 1 | 11 | 24.4 | 418 | 282 | 668 | 1000 | 28.6 | 190 | 3   |
| 2020 | 8 | 1 | 12 | 24.7 | 462 | 257 | 705 | 999  | 29.1 | 197 | 3.1 |
| 2020 | 8 | 1 | 13 | 24.9 | 474 | 121 | 590 | 999  | 29.3 | 203 | 3.2 |
| 2020 | 8 | 1 | 14 | 24.9 | 296 | 17  | 311 | 999  | 29.2 | 207 | 3.1 |
| 2020 | 8 | 1 | 15 | 24.8 | 162 | 4   | 165 | 999  | 28.7 | 207 | 3   |
| 2020 | 8 | 1 | 16 | 25   | 167 | 2   | 169 | 998  | 28   | 201 | 2.5 |
| 2020 | 8 | 1 | 17 | 25.2 | 90  | 0   | 90  | 998  | 27.3 | 188 | 2.1 |
| 2020 | 8 | 1 | 18 | 25.3 | 118 | 108 | 152 | 998  | 26.3 | 175 | 1.7 |
| 2020 | 8 | 1 | 19 | 24.8 | 17  | 0   | 17  | 998  | 25   | 169 | 1.6 |
| 2020 | 8 | 1 | 20 | 24.5 | 0   | 0   | 0   | 998  | 24.5 | 166 | 1.7 |
| 2020 | 8 | 1 | 21 | 24.3 | 0   | 0   | 0   | 999  | 24.3 | 168 | 1.7 |
| 2020 | 8 | 1 | 22 | 24   | 0   | 0   | 0   | 999  | 24   | 177 | 1.6 |
| 2020 | 8 | 1 | 23 | 23.7 | 0   | 0   | 0   | 999  | 23.7 | 183 | 1.5 |
| 2020 | 8 | 2 | 0  | 23.5 | 0   | 0   | 0   | 998  | 23.5 | 185 | 1.4 |
| 2020 | 8 | 2 | 1  | 23.3 | 0   | 0   | 0   | 998  | 23.3 | 186 | 1.3 |
| 2020 | 8 | 2 | 2  | 23.2 | 0   | 0   | 0   | 998  | 23.2 | 189 | 1.3 |
| 2020 | 8 | 2 | 3  | 23.1 | 0   | 0   | 0   | 998  | 23.1 | 190 | 1.3 |
| 2020 | 8 | 2 | 4  | 23.3 | 0   | 0   | 0   | 998  | 23.3 | 189 | 1.4 |
| 2020 | 8 | 2 | 5  | 23.6 | 0   | 0   | 0   | 998  | 23.6 | 189 | 1.6 |
| 2020 | 8 | 2 | 6  | 24.6 | 17  | 51  | 20  | 999  | 24.7 | 188 | 2.2 |
| 2020 | 8 | 2 | 7  | 25.4 | 74  | 404 | 174 | 999  | 25.8 | 184 | 2.8 |
| 2020 | 8 | 2 | 8  | 26   | 157 | 17  | 165 | 999  | 27   | 197 | 3.4 |
| 2020 | 8 | 2 | 9  | 26   | 268 | 265 | 434 | 999  | 27.8 | 201 | 3.7 |
| 2020 | 8 | 2 | 10 | 25.9 | 368 | 155 | 488 | 999  | 28.4 | 202 | 3.9 |
| 2020 | 8 | 2 | 11 | 25.5 | 308 | 20  | 325 | 998  | 28.6 | 204 | 4   |
| 2020 | 8 | 2 | 12 | 25.5 | 410 | 384 | 773 | 998  | 28.8 | 207 | 4   |
| 2020 | 8 | 2 | 13 | 25.5 | 470 | 243 | 701 | 998  | 28.8 | 211 | 3.8 |
| 2020 | 8 | 2 | 14 | 25.6 | 424 | 309 | 704 | 998  | 28.6 | 212 | 3.5 |
| 2020 | 8 | 2 | 15 | 25.9 | 386 | 221 | 565 | 997  | 28.4 | 210 | 3   |
| 2020 | 8 | 2 | 16 | 26.3 | 284 | 317 | 498 | 997  | 28.2 | 205 | 2.6 |
| 2020 | 8 | 2 | 17 | 26.4 | 189 | 32  | 205 | 997  | 27.7 | 197 | 2.5 |
| 2020 | 8 | 2 | 18 | 26.2 | 117 | 102 | 149 | 997  | 26.9 | 187 | 2.2 |
| 2020 | 8 | 2 | 19 | 25.7 | 33  | 7   | 34  | 997  | 25.9 | 185 | 2.2 |
| 2020 | 8 | 2 | 20 | 25.3 | 0   | 0   | 0   | 997  | 25.5 | 186 | 2.2 |
| 2020 | 8 | 2 | 21 | 24.9 | 0   | 0   | 0   | 997  | 25.2 | 188 | 2.4 |
| 2020 | 8 | 2 | 22 | 24.7 | 0   | 0   | 0   | 997  | 24.9 | 186 | 2.5 |
| 2020 | 8 | 2 | 23 | 24.6 | 0   | 0   | 0   | 997  | 24.6 | 183 | 2.5 |
| 2020 | 8 | 3 | 0  | 24.3 | 0   | 0   | 0   | 997  | 24.3 | 183 | 2.3 |
| 2020 | 8 | 3 | 1  | 24.3 | 0   | 0   | 0   | 997  | 24.3 | 187 | 2.2 |
| 2020 | 8 | 3 | 2  | 24.3 | 0   | 0   | 0   | 997  | 24.3 | 189 | 2.2 |
| 2020 | 8 | 3 | 3  | 24.4 | 0   | 0   | 0   | 997  | 24.4 | 193 | 2.4 |
| 2020 | 8 | 3 | 4  | 24.8 | 0   | 0   | 0   | 998  | 24.8 | 200 | 3.1 |
| 2020 | 8 | 3 | 5  | 24.8 | 0   | 0   | 0   | 998  | 24.8 | 203 | 3   |
| 2020 | 8 | 3 | 6  | 24.9 | 12  | 13  | 13  | 998  | 25.1 | 203 | 3.1 |
| 2020 | 8 | 3 | 7  | 25.3 | 30  | 0   | 30  | 999  | 25.7 | 202 | 3.2 |
| 2020 | 8 | 3 | 8  | 25.8 | 85  | 0   | 85  | 999  | 26.5 | 201 | 3.3 |
| 2020 | 8 | 3 | 9  | 26   | 276 | 205 | 404 | 999  | 27.3 | 204 | 3.7 |
| 2020 | 8 | 3 | 10 | 26.1 | 314 | 38  | 344 | 999  | 28   | 205 | 3.8 |
| 2020 | 8 | 3 | 11 | 26.2 | 412 | 299 | 676 | 998  | 28.5 | 205 | 3.9 |

|      |   |   |    |      |     |     |     |      |      |     |     |
|------|---|---|----|------|-----|-----|-----|------|------|-----|-----|
| 2020 | 8 | 3 | 12 | 26.3 | 409 | 386 | 773 | 998  | 28.7 | 207 | 4   |
| 2020 | 8 | 3 | 13 | 26.3 | 447 | 327 | 758 | 998  | 28.7 | 212 | 3.9 |
| 2020 | 8 | 3 | 14 | 26.2 | 444 | 222 | 645 | 998  | 28.5 | 216 | 3.7 |
| 2020 | 8 | 3 | 15 | 26.2 | 362 | 64  | 414 | 998  | 28.2 | 213 | 3.3 |
| 2020 | 8 | 3 | 16 | 26.3 | 203 | 9   | 209 | 998  | 27.8 | 207 | 3   |
| 2020 | 8 | 3 | 17 | 26.3 | 202 | 252 | 328 | 998  | 27.2 | 202 | 2.5 |
| 2020 | 8 | 3 | 18 | 26.1 | 113 | 345 | 218 | 998  | 26.4 | 189 | 2.1 |
| 2020 | 8 | 3 | 19 | 25.6 | 39  | 93  | 48  | 998  | 25.6 | 176 | 2.2 |
| 2020 | 8 | 3 | 20 | 25.3 | 0   | 0   | 0   | 998  | 25.3 | 175 | 2.5 |
| 2020 | 8 | 3 | 21 | 25.1 | 0   | 0   | 0   | 998  | 25.1 | 176 | 2.4 |
| 2020 | 8 | 3 | 22 | 24.8 | 0   | 0   | 0   | 999  | 24.8 | 178 | 2.2 |
| 2020 | 8 | 3 | 23 | 24.7 | 0   | 0   | 0   | 999  | 24.7 | 180 | 2.2 |
| 2020 | 8 | 4 | 0  | 24.7 | 0   | 0   | 0   | 999  | 24.7 | 186 | 2.5 |
| 2020 | 8 | 4 | 1  | 24.5 | 0   | 0   | 0   | 999  | 24.5 | 184 | 2   |
| 2020 | 8 | 4 | 2  | 24.2 | 0   | 0   | 0   | 998  | 24.2 | 179 | 1.6 |
| 2020 | 8 | 4 | 3  | 23.9 | 0   | 0   | 0   | 998  | 23.9 | 170 | 1.4 |
| 2020 | 8 | 4 | 4  | 23.8 | 0   | 0   | 0   | 999  | 23.8 | 161 | 1.4 |
| 2020 | 8 | 4 | 5  | 23.7 | 0   | 0   | 0   | 999  | 23.7 | 155 | 1.3 |
| 2020 | 8 | 4 | 6  | 24.6 | 10  | 0   | 10  | 1000 | 24.6 | 152 | 1.7 |
| 2020 | 8 | 4 | 7  | 25.2 | 90  | 88  | 111 | 1000 | 25.7 | 153 | 2.3 |
| 2020 | 8 | 4 | 8  | 25.5 | 182 | 117 | 234 | 1001 | 26.6 | 161 | 2.6 |
| 2020 | 8 | 4 | 9  | 25.6 | 230 | 425 | 494 | 1001 | 27.3 | 168 | 3   |
| 2020 | 8 | 4 | 10 | 25.7 | 353 | 266 | 559 | 1001 | 28   | 169 | 3.3 |
| 2020 | 8 | 4 | 11 | 25.8 | 387 | 366 | 708 | 1000 | 28.6 | 167 | 3.6 |
| 2020 | 8 | 4 | 12 | 25.9 | 394 | 424 | 793 | 1000 | 29.1 | 164 | 3.9 |
| 2020 | 8 | 4 | 13 | 26   | 209 | 745 | 915 | 999  | 29.5 | 163 | 4.2 |
| 2020 | 8 | 4 | 14 | 25.9 | 216 | 712 | 859 | 999  | 29.2 | 165 | 4.1 |
| 2020 | 8 | 4 | 15 | 26   | 373 | 276 | 596 | 1000 | 28.6 | 166 | 3.7 |
| 2020 | 8 | 4 | 16 | 26.2 | 273 | 351 | 508 | 1000 | 28   | 164 | 3.3 |
| 2020 | 8 | 4 | 17 | 26.3 | 200 | 61  | 231 | 1000 | 27.5 | 162 | 3.1 |
| 2020 | 8 | 4 | 18 | 26.1 | 128 | 260 | 206 | 1000 | 26.8 | 161 | 2.8 |
| 2020 | 8 | 4 | 19 | 25.7 | 34  | 51  | 39  | 1000 | 25.9 | 161 | 2.2 |
| 2020 | 8 | 4 | 20 | 25.5 | 0   | 0   | 0   | 1001 | 25.6 | 161 | 2.3 |
| 2020 | 8 | 4 | 21 | 25.4 | 0   | 0   | 0   | 1001 | 25.4 | 161 | 2.4 |
| 2020 | 8 | 4 | 22 | 24.9 | 0   | 0   | 0   | 1001 | 24.9 | 151 | 2.1 |
| 2020 | 8 | 4 | 23 | 24.9 | 0   | 0   | 0   | 1001 | 24.9 | 143 | 2.3 |
| 2020 | 8 | 5 | 0  | 25   | 0   | 0   | 0   | 1000 | 25   | 139 | 2.5 |
| 2020 | 8 | 5 | 1  | 25.1 | 0   | 0   | 0   | 1000 | 25.1 | 140 | 2.7 |
| 2020 | 8 | 5 | 2  | 25.2 | 0   | 0   | 0   | 1000 | 25.2 | 143 | 2.8 |
| 2020 | 8 | 5 | 3  | 25.2 | 0   | 0   | 0   | 1000 | 25.2 | 145 | 2.7 |
| 2020 | 8 | 5 | 4  | 25.2 | 0   | 0   | 0   | 1001 | 25.2 | 145 | 2.4 |
| 2020 | 8 | 5 | 5  | 25.2 | 0   | 0   | 0   | 1001 | 25.2 | 145 | 2.4 |
| 2020 | 8 | 5 | 6  | 25.4 | 3   | 0   | 3   | 1001 | 25.5 | 145 | 2.7 |
| 2020 | 8 | 5 | 7  | 26   | 85  | 28  | 92  | 1002 | 26.2 | 144 | 3.1 |
| 2020 | 8 | 5 | 8  | 26.5 | 181 | 111 | 230 | 1002 | 26.9 | 145 | 3.4 |
| 2020 | 8 | 5 | 9  | 26.7 | 273 | 220 | 409 | 1002 | 27.5 | 154 | 3.8 |
| 2020 | 8 | 5 | 10 | 26.6 | 365 | 138 | 471 | 1001 | 28.1 | 156 | 4.3 |
| 2020 | 8 | 5 | 11 | 26.5 | 433 | 164 | 577 | 1001 | 28.5 | 159 | 4.8 |
| 2020 | 8 | 5 | 12 | 26.4 | 392 | 432 | 797 | 1000 | 28.9 | 162 | 5   |
| 2020 | 8 | 5 | 13 | 26.5 | 466 | 104 | 564 | 1000 | 29.1 | 164 | 5.2 |



|      |   |   |    |      |     |     |     |      |      |     |     |
|------|---|---|----|------|-----|-----|-----|------|------|-----|-----|
| 2020 | 8 | 5 | 14 | 26.5 | 436 | 99  | 525 | 1000 | 29   | 163 | 5.1 |
| 2020 | 8 | 5 | 15 | 26.6 | 352 | 357 | 640 | 999  | 28.8 | 161 | 4.9 |
| 2020 | 8 | 5 | 16 | 26.8 | 295 | 249 | 461 | 999  | 28.4 | 158 | 4.8 |
| 2020 | 8 | 5 | 17 | 26.8 | 202 | 234 | 318 | 999  | 27.8 | 154 | 4.9 |
| 2020 | 8 | 5 | 18 | 26.4 | 135 | 206 | 197 | 998  | 27   | 152 | 4.9 |
| 2020 | 8 | 5 | 19 | 26   | 30  | 31  | 33  | 998  | 26.2 | 153 | 4.9 |
| 2020 | 8 | 5 | 20 | 25.8 | 0   | 0   | 0   | 999  | 26   | 158 | 5   |
| 2020 | 8 | 5 | 21 | 25.7 | 0   | 0   | 0   | 999  | 25.9 | 163 | 5.1 |
| 2020 | 8 | 5 | 22 | 25.7 | 0   | 0   | 0   | 999  | 25.9 | 168 | 5.2 |
| 2020 | 8 | 5 | 23 | 25.6 | 0   | 0   | 0   | 999  | 25.9 | 172 | 5.3 |
| 2020 | 8 | 6 | 0  | 25.5 | 0   | 0   | 0   | 998  | 25.8 | 179 | 5.5 |
| 2020 | 8 | 6 | 1  | 25.4 | 0   | 0   | 0   | 998  | 25.6 | 185 | 5.7 |
| 2020 | 8 | 6 | 2  | 25.2 | 0   | 0   | 0   | 997  | 25.4 | 188 | 5.8 |
| 2020 | 8 | 6 | 3  | 25   | 0   | 0   | 0   | 997  | 25.3 | 192 | 5.8 |
| 2020 | 8 | 6 | 4  | 24.9 | 0   | 0   | 0   | 997  | 25.2 | 196 | 5.8 |
| 2020 | 8 | 6 | 5  | 24.9 | 0   | 0   | 0   | 997  | 25.1 | 201 | 5.8 |
| 2020 | 8 | 6 | 6  | 25   | 3   | 0   | 3   | 997  | 25.2 | 206 | 5.6 |
| 2020 | 8 | 6 | 7  | 25.2 | 10  | 0   | 10  | 997  | 25.5 | 212 | 5.4 |
| 2020 | 8 | 6 | 8  | 25.5 | 44  | 0   | 44  | 997  | 25.8 | 219 | 5   |
| 2020 | 8 | 6 | 9  | 25.8 | 86  | 0   | 86  | 997  | 26   | 222 | 4.6 |
| 2020 | 8 | 6 | 10 | 26   | 113 | 0   | 113 | 997  | 26.4 | 221 | 4.5 |
| 2020 | 8 | 6 | 11 | 26.3 | 338 | 28  | 363 | 997  | 27   | 221 | 4.7 |
| 2020 | 8 | 6 | 12 | 26.6 | 74  | 0   | 74  | 996  | 27.9 | 223 | 5   |
| 2020 | 8 | 6 | 13 | 26.7 | 273 | 15  | 287 | 996  | 28.7 | 228 | 5   |
| 2020 | 8 | 6 | 14 | 26.6 | 114 | 0   | 114 | 996  | 28.9 | 234 | 4.9 |
| 2020 | 8 | 6 | 15 | 26.4 | 327 | 37  | 357 | 995  | 28.7 | 237 | 4.8 |
| 2020 | 8 | 6 | 16 | 26.2 | 65  | 0   | 65  | 996  | 28.1 | 237 | 4.4 |
| 2020 | 8 | 6 | 17 | 25.9 | 205 | 198 | 302 | 996  | 27.3 | 235 | 3.8 |
| 2020 | 8 | 6 | 18 | 25.7 | 105 | 24  | 112 | 996  | 26.4 | 233 | 2.8 |
| 2020 | 8 | 6 | 19 | 25.4 | 26  | 0   | 26  | 996  | 25.5 | 230 | 2   |
| 2020 | 8 | 6 | 20 | 25.2 | 0   | 0   | 0   | 997  | 25.2 | 224 | 1.6 |
| 2020 | 8 | 6 | 21 | 24.9 | 0   | 0   | 0   | 997  | 24.9 | 214 | 1.3 |
| 2020 | 8 | 6 | 22 | 24.8 | 0   | 0   | 0   | 997  | 24.8 | 210 | 1.2 |
| 2020 | 8 | 6 | 23 | 24.7 | 0   | 0   | 0   | 997  | 24.7 | 209 | 1.2 |
| 2020 | 8 | 7 | 0  | 24.5 | 0   | 0   | 0   | 996  | 24.5 | 209 | 1.1 |
| 2020 | 8 | 7 | 1  | 24.5 | 0   | 0   | 0   | 996  | 24.5 | 212 | 1.3 |
| 2020 | 8 | 7 | 2  | 24.4 | 0   | 0   | 0   | 996  | 24.4 | 216 | 1.3 |
| 2020 | 8 | 7 | 3  | 24.3 | 0   | 0   | 0   | 996  | 24.3 | 217 | 1.1 |
| 2020 | 8 | 7 | 4  | 24.3 | 0   | 0   | 0   | 995  | 24.3 | 212 | 1.1 |
| 2020 | 8 | 7 | 5  | 24.4 | 0   | 0   | 0   | 995  | 24.4 | 213 | 1.2 |
| 2020 | 8 | 7 | 6  | 24.9 | 5   | 2   | 5   | 995  | 24.9 | 208 | 1.5 |
| 2020 | 8 | 7 | 7  | 25.6 | 47  | 0   | 47  | 995  | 25.7 | 201 | 2.2 |
| 2020 | 8 | 7 | 8  | 26   | 51  | 0   | 51  | 995  | 26.4 | 206 | 2.6 |
| 2020 | 8 | 7 | 9  | 26.1 | 70  | 0   | 70  | 996  | 26.7 | 207 | 3   |
| 2020 | 8 | 7 | 10 | 25.8 | 74  | 0   | 74  | 995  | 26.6 | 201 | 3.4 |
| 2020 | 8 | 7 | 11 | 25.3 | 115 | 0   | 115 | 995  | 26.3 | 197 | 3.8 |
| 2020 | 8 | 7 | 12 | 25.2 | 85  | 0   | 85  | 995  | 26.2 | 194 | 3.7 |
| 2020 | 8 | 7 | 13 | 25.3 | 82  | 0   | 82  | 994  | 26.4 | 188 | 3.3 |
| 2020 | 8 | 7 | 14 | 25.5 | 73  | 0   | 73  | 994  | 26.6 | 178 | 3.1 |
| 2020 | 8 | 7 | 15 | 25.8 | 58  | 0   | 58  | 993  | 26.7 | 173 | 3.1 |

|      |   |   |    |      |     |     |     |     |      |     |     |
|------|---|---|----|------|-----|-----|-----|-----|------|-----|-----|
| 2020 | 8 | 7 | 16 | 25.9 | 54  | 0   | 54  | 993 | 26.5 | 174 | 3   |
| 2020 | 8 | 7 | 17 | 25.7 | 41  | 0   | 41  | 993 | 26.2 | 182 | 3.1 |
| 2020 | 8 | 7 | 18 | 25.6 | 22  | 0   | 22  | 993 | 25.8 | 183 | 3.4 |
| 2020 | 8 | 7 | 19 | 25.2 | 8   | 0   | 8   | 992 | 25.4 | 183 | 3.3 |
| 2020 | 8 | 7 | 20 | 25   | 0   | 0   | 0   | 993 | 25.2 | 188 | 3.6 |
| 2020 | 8 | 7 | 21 | 24.9 | 0   | 0   | 0   | 993 | 25   | 193 | 3.7 |
| 2020 | 8 | 7 | 22 | 24.9 | 0   | 0   | 0   | 993 | 25   | 192 | 3.4 |
| 2020 | 8 | 7 | 23 | 24.9 | 0   | 0   | 0   | 993 | 24.9 | 192 | 3.1 |
| 2020 | 8 | 8 | 0  | 24.9 | 0   | 0   | 0   | 993 | 24.9 | 193 | 2.7 |
| 2020 | 8 | 8 | 1  | 24.9 | 0   | 0   | 0   | 993 | 24.9 | 198 | 2.6 |
| 2020 | 8 | 8 | 2  | 24.9 | 0   | 0   | 0   | 992 | 24.9 | 204 | 2.6 |
| 2020 | 8 | 8 | 3  | 24.9 | 0   | 0   | 0   | 992 | 24.9 | 208 | 2.7 |
| 2020 | 8 | 8 | 4  | 24.7 | 0   | 0   | 0   | 992 | 24.7 | 212 | 2.6 |
| 2020 | 8 | 8 | 5  | 24.7 | 0   | 0   | 0   | 992 | 24.8 | 221 | 2.9 |
| 2020 | 8 | 8 | 6  | 25.1 | 5   | 0   | 5   | 992 | 25.1 | 226 | 3.4 |
| 2020 | 8 | 8 | 7  | 25.7 | 35  | 0   | 35  | 992 | 25.8 | 226 | 3.6 |
| 2020 | 8 | 8 | 8  | 26.3 | 96  | 0   | 96  | 992 | 26.6 | 225 | 3.8 |
| 2020 | 8 | 8 | 9  | 26.5 | 32  | 0   | 32  | 992 | 27   | 224 | 4   |
| 2020 | 8 | 8 | 10 | 26.4 | 51  | 0   | 51  | 992 | 27.1 | 220 | 3.9 |
| 2020 | 8 | 8 | 11 | 26.3 | 160 | 5   | 164 | 992 | 27.1 | 212 | 3.7 |
| 2020 | 8 | 8 | 12 | 26.3 | 112 | 0   | 112 | 992 | 27.2 | 203 | 3.6 |
| 2020 | 8 | 8 | 13 | 26.4 | 301 | 17  | 317 | 992 | 27.3 | 199 | 3.5 |
| 2020 | 8 | 8 | 14 | 26.6 | 191 | 8   | 199 | 991 | 27.5 | 197 | 3.4 |
| 2020 | 8 | 8 | 15 | 26.6 | 311 | 30  | 335 | 991 | 27.6 | 193 | 3.3 |
| 2020 | 8 | 8 | 16 | 26.6 | 206 | 10  | 213 | 991 | 27.3 | 185 | 3.2 |
| 2020 | 8 | 8 | 17 | 26.5 | 205 | 125 | 266 | 991 | 26.8 | 175 | 3   |
| 2020 | 8 | 8 | 18 | 26.2 | 66  | 0   | 66  | 991 | 26.3 | 170 | 2.9 |
| 2020 | 8 | 8 | 19 | 25.8 | 16  | 0   | 16  | 991 | 25.8 | 167 | 2.9 |
| 2020 | 8 | 8 | 20 | 25.6 | 0   | 0   | 0   | 992 | 25.6 | 167 | 3.1 |
| 2020 | 8 | 8 | 21 | 25.4 | 0   | 0   | 0   | 992 | 25.5 | 170 | 3.4 |
| 2020 | 8 | 8 | 22 | 25.4 | 0   | 0   | 0   | 992 | 25.5 | 175 | 3.8 |
| 2020 | 8 | 8 | 23 | 25.4 | 0   | 0   | 0   | 992 | 25.5 | 179 | 3.9 |
| 2020 | 8 | 9 | 0  | 25.4 | 0   | 0   | 0   | 992 | 25.5 | 182 | 4.1 |
| 2020 | 8 | 9 | 1  | 25.3 | 0   | 0   | 0   | 992 | 25.4 | 188 | 4.2 |
| 2020 | 8 | 9 | 2  | 25.3 | 0   | 0   | 0   | 992 | 25.3 | 191 | 4.2 |
| 2020 | 8 | 9 | 3  | 25.3 | 0   | 0   | 0   | 992 | 25.3 | 192 | 4.2 |
| 2020 | 8 | 9 | 4  | 25.3 | 0   | 0   | 0   | 992 | 25.3 | 194 | 4.6 |
| 2020 | 8 | 9 | 5  | 25.3 | 0   | 0   | 0   | 992 | 25.4 | 194 | 4.8 |
| 2020 | 8 | 9 | 6  | 25.4 | 6   | 0   | 6   | 992 | 25.5 | 195 | 4.6 |
| 2020 | 8 | 9 | 7  | 25.8 | 56  | 0   | 56  | 993 | 26   | 195 | 4.7 |
| 2020 | 8 | 9 | 8  | 26.3 | 178 | 146 | 241 | 993 | 26.7 | 195 | 4.8 |
| 2020 | 8 | 9 | 9  | 26.6 | 176 | 584 | 534 | 993 | 27.3 | 196 | 5   |
| 2020 | 8 | 9 | 10 | 26.6 | 360 | 209 | 520 | 994 | 27.7 | 197 | 5.3 |
| 2020 | 8 | 9 | 11 | 26.5 | 428 | 204 | 606 | 994 | 28   | 198 | 5.5 |
| 2020 | 8 | 9 | 12 | 26.4 | 464 | 226 | 674 | 993 | 28.2 | 198 | 5.4 |
| 2020 | 8 | 9 | 13 | 26.4 | 161 | 807 | 920 | 993 | 28.4 | 196 | 5.2 |
| 2020 | 8 | 9 | 14 | 26.3 | 390 | 376 | 726 | 992 | 28.6 | 192 | 5   |
| 2020 | 8 | 9 | 15 | 26.3 | 141 | 779 | 762 | 992 | 28.6 | 189 | 4.8 |
| 2020 | 8 | 9 | 16 | 26.3 | 119 | 746 | 609 | 992 | 28.4 | 187 | 4.5 |
| 2020 | 8 | 9 | 17 | 26.3 | 93  | 683 | 423 | 992 | 28   | 183 | 3.8 |

|      |   |    |    |      |     |     |     |     |      |     |     |
|------|---|----|----|------|-----|-----|-----|-----|------|-----|-----|
| 2020 | 8 | 9  | 18 | 26.1 | 66  | 541 | 221 | 992 | 27.1 | 174 | 3.2 |
| 2020 | 8 | 9  | 19 | 25.6 | 28  | 203 | 44  | 992 | 25.9 | 162 | 2.7 |
| 2020 | 8 | 9  | 20 | 25.5 | 0   | 0   | 0   | 993 | 25.5 | 156 | 2.9 |
| 2020 | 8 | 9  | 21 | 25.3 | 0   | 0   | 0   | 993 | 25.3 | 154 | 3.1 |
| 2020 | 8 | 9  | 22 | 25.2 | 0   | 0   | 0   | 993 | 25.2 | 153 | 3.1 |
| 2020 | 8 | 9  | 23 | 25.1 | 0   | 0   | 0   | 993 | 25.1 | 154 | 3   |
| 2020 | 8 | 10 | 0  | 25.1 | 0   | 0   | 0   | 992 | 25.1 | 157 | 3   |
| 2020 | 8 | 10 | 1  | 25.2 | 0   | 0   | 0   | 992 | 25.3 | 165 | 3.2 |
| 2020 | 8 | 10 | 2  | 25.3 | 0   | 0   | 0   | 992 | 25.4 | 168 | 3.3 |
| 2020 | 8 | 10 | 3  | 25.3 | 0   | 0   | 0   | 992 | 25.3 | 169 | 3.1 |
| 2020 | 8 | 10 | 4  | 25.2 | 0   | 0   | 0   | 993 | 25.2 | 166 | 2.8 |
| 2020 | 8 | 10 | 5  | 25.1 | 0   | 0   | 0   | 993 | 25.1 | 161 | 2.5 |
| 2020 | 8 | 10 | 6  | 25.4 | 9   | 0   | 9   | 993 | 25.6 | 154 | 2.7 |
| 2020 | 8 | 10 | 7  | 26.1 | 57  | 470 | 165 | 993 | 26.3 | 144 | 2.8 |
| 2020 | 8 | 10 | 8  | 26.3 | 88  | 636 | 362 | 993 | 27.1 | 141 | 2.7 |
| 2020 | 8 | 10 | 9  | 26.7 | 247 | 340 | 454 | 992 | 27.8 | 140 | 2.7 |
| 2020 | 8 | 10 | 10 | 26.9 | 308 | 37  | 336 | 992 | 28.3 | 141 | 2.7 |
| 2020 | 8 | 10 | 11 | 27   | 146 | 2   | 148 | 992 | 28.8 | 141 | 2.5 |
| 2020 | 8 | 10 | 12 | 26.9 | 81  | 0   | 81  | 991 | 29.2 | 146 | 2   |
| 2020 | 8 | 10 | 13 | 26.8 | 85  | 0   | 85  | 991 | 29.3 | 174 | 1.4 |
| 2020 | 8 | 10 | 14 | 26.9 | 72  | 0   | 72  | 990 | 29.1 | 234 | 1.6 |
| 2020 | 8 | 10 | 15 | 27   | 70  | 0   | 70  | 990 | 28.5 | 255 | 2.3 |
| 2020 | 8 | 10 | 16 | 26.9 | 241 | 24  | 257 | 990 | 27.7 | 250 | 2.8 |
| 2020 | 8 | 10 | 17 | 26.4 | 135 | 0   | 135 | 991 | 26.9 | 240 | 3.3 |
| 2020 | 8 | 10 | 18 | 25.7 | 64  | 0   | 64  | 992 | 26   | 228 | 3   |
| 2020 | 8 | 10 | 19 | 25.1 | 6   | 0   | 6   | 993 | 25.1 | 212 | 2.2 |
| 2020 | 8 | 10 | 20 | 24.9 | 0   | 0   | 0   | 993 | 24.9 | 195 | 2.1 |
| 2020 | 8 | 10 | 21 | 25   | 0   | 0   | 0   | 994 | 25.1 | 182 | 2.4 |
| 2020 | 8 | 10 | 22 | 25.2 | 0   | 0   | 0   | 994 | 25.2 | 175 | 2.6 |
| 2020 | 8 | 10 | 23 | 25.3 | 0   | 0   | 0   | 994 | 25.3 | 177 | 2.8 |
| 2020 | 8 | 11 | 0  | 25.4 | 0   | 0   | 0   | 994 | 25.4 | 184 | 2.8 |
| 2020 | 8 | 11 | 1  | 25.3 | 0   | 0   | 0   | 995 | 25.3 | 190 | 2.6 |
| 2020 | 8 | 11 | 2  | 25   | 0   | 0   | 0   | 995 | 25   | 189 | 2.3 |
| 2020 | 8 | 11 | 3  | 24.7 | 0   | 0   | 0   | 995 | 24.7 | 185 | 2.2 |
| 2020 | 8 | 11 | 4  | 24.6 | 0   | 0   | 0   | 995 | 24.6 | 180 | 2.3 |
| 2020 | 8 | 11 | 5  | 24.6 | 0   | 0   | 0   | 996 | 24.6 | 177 | 2.4 |
| 2020 | 8 | 11 | 6  | 25.1 | 5   | 0   | 5   | 997 | 25.1 | 177 | 2.7 |
| 2020 | 8 | 11 | 7  | 25.8 | 60  | 0   | 60  | 997 | 26   | 177 | 2.9 |
| 2020 | 8 | 11 | 8  | 26.2 | 153 | 344 | 300 | 998 | 26.7 | 190 | 3.4 |
| 2020 | 8 | 11 | 9  | 26.3 | 104 | 0   | 104 | 998 | 27.3 | 198 | 3.9 |
| 2020 | 8 | 11 | 10 | 26.4 | 360 | 136 | 463 | 998 | 27.8 | 207 | 4.3 |
| 2020 | 8 | 11 | 11 | 26.4 | 292 | 18  | 307 | 999 | 28.1 | 215 | 4.8 |
| 2020 | 8 | 11 | 12 | 26.3 | 255 | 13  | 267 | 999 | 28.2 | 220 | 4.8 |
| 2020 | 8 | 11 | 13 | 26.3 | 412 | 47  | 457 | 999 | 28.1 | 220 | 4.5 |
| 2020 | 8 | 11 | 14 | 26.5 | 223 | 11  | 233 | 999 | 28   | 217 | 3.9 |
| 2020 | 8 | 11 | 15 | 26.8 | 334 | 44  | 369 | 999 | 27.9 | 207 | 3.2 |
| 2020 | 8 | 11 | 16 | 27.1 | 188 | 6   | 191 | 999 | 27.8 | 193 | 2.7 |
| 2020 | 8 | 11 | 17 | 27.1 | 130 | 0   | 130 | 999 | 27.6 | 187 | 2.6 |
| 2020 | 8 | 11 | 18 | 26.8 | 106 | 129 | 142 | 999 | 27   | 191 | 2.4 |
| 2020 | 8 | 11 | 19 | 26.4 | 28  | 56  | 33  | 999 | 26.5 | 199 | 2.6 |

|      |   |    |    |      |     |     |     |      |      |     |     |
|------|---|----|----|------|-----|-----|-----|------|------|-----|-----|
| 2020 | 8 | 11 | 20 | 26.3 | 0   | 0   | 0   | 1000 | 26.3 | 205 | 2.6 |
| 2020 | 8 | 11 | 21 | 26.1 | 0   | 0   | 0   | 1001 | 26.1 | 210 | 2.7 |
| 2020 | 8 | 11 | 22 | 26   | 0   | 0   | 0   | 1001 | 26   | 212 | 2.7 |
| 2020 | 8 | 11 | 23 | 25.9 | 0   | 0   | 0   | 1001 | 25.9 | 212 | 2.7 |
| 2020 | 8 | 12 | 0  | 25.8 | 0   | 0   | 0   | 1000 | 25.8 | 212 | 2.7 |
| 2020 | 8 | 12 | 1  | 25.8 | 0   | 0   | 0   | 1000 | 25.8 | 214 | 2.9 |
| 2020 | 8 | 12 | 2  | 25.7 | 0   | 0   | 0   | 1000 | 25.7 | 212 | 2.7 |
| 2020 | 8 | 12 | 3  | 25.5 | 0   | 0   | 0   | 1000 | 25.5 | 206 | 2.4 |
| 2020 | 8 | 12 | 4  | 25.4 | 0   | 0   | 0   | 1000 | 25.4 | 203 | 2.5 |
| 2020 | 8 | 12 | 5  | 25.4 | 0   | 0   | 0   | 1001 | 25.4 | 202 | 2.4 |
| 2020 | 8 | 12 | 6  | 25.7 | 4   | 0   | 4   | 1001 | 25.7 | 198 | 2.5 |
| 2020 | 8 | 12 | 7  | 26.2 | 82  | 131 | 111 | 1001 | 26.3 | 194 | 2.7 |
| 2020 | 8 | 12 | 8  | 26.7 | 126 | 510 | 343 | 1002 | 27   | 197 | 3   |
| 2020 | 8 | 12 | 9  | 27.1 | 234 | 380 | 465 | 1002 | 27.7 | 204 | 3   |
| 2020 | 8 | 12 | 10 | 27.3 | 253 | 537 | 661 | 1001 | 28.6 | 207 | 2.9 |
| 2020 | 8 | 12 | 11 | 27.3 | 427 | 183 | 585 | 1001 | 29.1 | 210 | 2.8 |
| 2020 | 8 | 12 | 12 | 27.4 | 440 | 76  | 510 | 1001 | 29.4 | 213 | 2.8 |
| 2020 | 8 | 12 | 13 | 27.4 | 304 | 17  | 320 | 1000 | 29.6 | 216 | 3   |
| 2020 | 8 | 12 | 14 | 27.2 | 380 | 43  | 419 | 1000 | 29.4 | 219 | 3.1 |
| 2020 | 8 | 12 | 15 | 27.1 | 217 | 9   | 225 | 1000 | 28.8 | 221 | 2.8 |
| 2020 | 8 | 12 | 16 | 27   | 193 | 7   | 198 | 1000 | 28.4 | 220 | 2.5 |
| 2020 | 8 | 12 | 17 | 27   | 195 | 213 | 296 | 1000 | 27.9 | 216 | 1.9 |
| 2020 | 8 | 12 | 18 | 26.8 | 70  | 0   | 70  | 1001 | 27.2 | 208 | 1.3 |
| 2020 | 8 | 12 | 19 | 26   | 12  | 0   | 12  | 1001 | 26.1 | 197 | 1   |
| 2020 | 8 | 12 | 20 | 25.6 | 0   | 0   | 0   | 1001 | 25.6 | 188 | 1   |
| 2020 | 8 | 12 | 21 | 25.3 | 0   | 0   | 0   | 1001 | 25.3 | 183 | 1.1 |
| 2020 | 8 | 12 | 22 | 25   | 0   | 0   | 0   | 1001 | 25   | 179 | 1.2 |
| 2020 | 8 | 12 | 23 | 24.9 | 0   | 0   | 0   | 1001 | 24.9 | 176 | 1.2 |
| 2020 | 8 | 13 | 0  | 24.7 | 0   | 0   | 0   | 1000 | 24.7 | 177 | 1.3 |
| 2020 | 8 | 13 | 1  | 24.6 | 0   | 0   | 0   | 1000 | 24.6 | 181 | 1.4 |
| 2020 | 8 | 13 | 2  | 24.6 | 0   | 0   | 0   | 1000 | 24.6 | 190 | 1.4 |
| 2020 | 8 | 13 | 3  | 24.7 | 0   | 0   | 0   | 1000 | 24.7 | 193 | 1.6 |
| 2020 | 8 | 13 | 4  | 24.8 | 0   | 0   | 0   | 1000 | 24.8 | 193 | 1.8 |
| 2020 | 8 | 13 | 5  | 24.8 | 0   | 0   | 0   | 1000 | 24.8 | 192 | 2   |
| 2020 | 8 | 13 | 6  | 25.4 | 10  | 29  | 11  | 1000 | 25.4 | 190 | 2.5 |
| 2020 | 8 | 13 | 7  | 26   | 62  | 427 | 158 | 1000 | 26.4 | 187 | 3.1 |
| 2020 | 8 | 13 | 8  | 26.3 | 91  | 628 | 358 | 1000 | 27.4 | 194 | 3.5 |
| 2020 | 8 | 13 | 9  | 26.4 | 112 | 727 | 553 | 1000 | 28.3 | 200 | 3.7 |
| 2020 | 8 | 13 | 10 | 26.4 | 131 | 778 | 720 | 999  | 29.1 | 206 | 3.9 |
| 2020 | 8 | 13 | 11 | 26.5 | 145 | 804 | 841 | 999  | 29.8 | 211 | 4.1 |
| 2020 | 8 | 13 | 12 | 26.6 | 147 | 824 | 911 | 998  | 30.2 | 213 | 4.1 |
| 2020 | 8 | 13 | 13 | 26.6 | 150 | 823 | 917 | 998  | 30.4 | 212 | 4   |
| 2020 | 8 | 13 | 14 | 26.5 | 146 | 809 | 863 | 997  | 30.4 | 208 | 3.9 |
| 2020 | 8 | 13 | 15 | 26.4 | 144 | 769 | 750 | 997  | 30.2 | 205 | 3.8 |
| 2020 | 8 | 13 | 16 | 26.3 | 128 | 719 | 593 | 997  | 29.7 | 202 | 3.5 |
| 2020 | 8 | 13 | 17 | 26.4 | 107 | 627 | 403 | 997  | 28.9 | 201 | 3   |
| 2020 | 8 | 13 | 18 | 26.6 | 77  | 454 | 201 | 997  | 27.8 | 198 | 2.1 |
| 2020 | 8 | 13 | 19 | 26.1 | 25  | 110 | 33  | 997  | 26.4 | 191 | 1.4 |
| 2020 | 8 | 13 | 20 | 25.8 | 0   | 0   | 0   | 997  | 25.9 | 180 | 1.4 |
| 2020 | 8 | 13 | 21 | 25.6 | 0   | 0   | 0   | 997  | 25.6 | 174 | 1.6 |

|      |   |    |    |      |     |     |     |     |      |     |     |
|------|---|----|----|------|-----|-----|-----|-----|------|-----|-----|
| 2020 | 8 | 13 | 22 | 25.3 | 0   | 0   | 0   | 997 | 25.3 | 171 | 1.8 |
| 2020 | 8 | 13 | 23 | 25   | 0   | 0   | 0   | 996 | 25   | 171 | 1.9 |
| 2020 | 8 | 14 | 0  | 25   | 0   | 0   | 0   | 996 | 25   | 174 | 2.2 |
| 2020 | 8 | 14 | 1  | 25   | 0   | 0   | 0   | 996 | 25   | 180 | 2.3 |
| 2020 | 8 | 14 | 2  | 25   | 0   | 0   | 0   | 996 | 25   | 185 | 2.3 |
| 2020 | 8 | 14 | 3  | 24.9 | 0   | 0   | 0   | 996 | 24.9 | 188 | 2.3 |
| 2020 | 8 | 14 | 4  | 24.9 | 0   | 0   | 0   | 996 | 24.9 | 191 | 2.2 |
| 2020 | 8 | 14 | 5  | 24.8 | 0   | 0   | 0   | 996 | 24.8 | 194 | 2.3 |
| 2020 | 8 | 14 | 6  | 25.4 | 7   | 12  | 7   | 996 | 25.5 | 197 | 2.7 |
| 2020 | 8 | 14 | 7  | 26.1 | 82  | 281 | 144 | 996 | 26.8 | 209 | 3.4 |
| 2020 | 8 | 14 | 8  | 26.6 | 133 | 481 | 337 | 996 | 27.9 | 223 | 3.7 |
| 2020 | 8 | 14 | 9  | 27   | 160 | 615 | 532 | 996 | 29   | 232 | 3.7 |
| 2020 | 8 | 14 | 10 | 27.1 | 175 | 696 | 701 | 996 | 29.9 | 232 | 3.6 |
| 2020 | 8 | 14 | 11 | 27.1 | 185 | 741 | 825 | 995 | 30.5 | 219 | 3.8 |
| 2020 | 8 | 14 | 12 | 27.2 | 199 | 750 | 892 | 994 | 30.8 | 210 | 4.4 |
| 2020 | 8 | 14 | 13 | 27.3 | 451 | 89  | 533 | 994 | 31.1 | 218 | 4.3 |
| 2020 | 8 | 14 | 14 | 27.3 | 206 | 719 | 842 | 995 | 31.1 | 235 | 3.8 |
| 2020 | 8 | 14 | 15 | 27.1 | 360 | 283 | 583 | 995 | 30.8 | 242 | 3.4 |
| 2020 | 8 | 14 | 16 | 26.9 | 206 | 515 | 538 | 995 | 30.3 | 240 | 2.9 |
| 2020 | 8 | 14 | 17 | 27   | 176 | 324 | 328 | 995 | 29.6 | 236 | 2.3 |
| 2020 | 8 | 14 | 18 | 27   | 105 | 294 | 184 | 995 | 28.5 | 232 | 1.7 |
| 2020 | 8 | 14 | 19 | 26.6 | 22  | 50  | 25  | 996 | 26.9 | 229 | 1.1 |
| 2020 | 8 | 14 | 20 | 26.3 | 0   | 0   | 0   | 996 | 26.4 | 222 | 1   |
| 2020 | 8 | 14 | 21 | 26.1 | 0   | 0   | 0   | 996 | 26.1 | 213 | 1   |
| 2020 | 8 | 14 | 22 | 25.7 | 0   | 0   | 0   | 996 | 25.7 | 205 | 1.1 |
| 2020 | 8 | 14 | 23 | 25.4 | 0   | 0   | 0   | 996 | 25.4 | 199 | 1.1 |
| 2020 | 8 | 15 | 0  | 25.1 | 0   | 0   | 0   | 996 | 25.1 | 199 | 1.2 |
| 2020 | 8 | 15 | 1  | 24.9 | 0   | 0   | 0   | 996 | 24.9 | 202 | 1.3 |
| 2020 | 8 | 15 | 2  | 24.7 | 0   | 0   | 0   | 996 | 24.7 | 204 | 1.3 |
| 2020 | 8 | 15 | 3  | 24.5 | 0   | 0   | 0   | 996 | 24.5 | 204 | 1.3 |
| 2020 | 8 | 15 | 4  | 24.3 | 0   | 0   | 0   | 996 | 24.3 | 203 | 1.4 |
| 2020 | 8 | 15 | 5  | 24.2 | 0   | 0   | 0   | 997 | 24.2 | 206 | 1.4 |
| 2020 | 8 | 15 | 6  | 25.3 | 0   | 0   | 0   | 998 | 25.3 | 211 | 2   |
| 2020 | 8 | 15 | 7  | 26   | 77  | 314 | 146 | 998 | 26.6 | 214 | 2.7 |
| 2020 | 8 | 15 | 8  | 26.1 | 123 | 521 | 342 | 998 | 27.7 | 218 | 2.9 |
| 2020 | 8 | 15 | 9  | 26.1 | 153 | 635 | 536 | 998 | 28.9 | 222 | 3   |
| 2020 | 8 | 15 | 10 | 26.1 | 175 | 701 | 704 | 998 | 29.8 | 226 | 3   |
| 2020 | 8 | 15 | 11 | 26.1 | 190 | 740 | 828 | 998 | 30.5 | 228 | 3   |
| 2020 | 8 | 15 | 12 | 26.1 | 153 | 822 | 911 | 997 | 31   | 231 | 3   |
| 2020 | 8 | 15 | 13 | 26   | 153 | 824 | 919 | 997 | 31.3 | 232 | 3   |
| 2020 | 8 | 15 | 14 | 25.8 | 152 | 808 | 865 | 997 | 31.2 | 232 | 2.9 |
| 2020 | 8 | 15 | 15 | 25.6 | 146 | 774 | 752 | 997 | 30.9 | 232 | 2.8 |
| 2020 | 8 | 15 | 16 | 25.6 | 132 | 718 | 592 | 997 | 30.4 | 228 | 2.4 |
| 2020 | 8 | 15 | 17 | 25.4 | 109 | 627 | 401 | 997 | 29.7 | 221 | 1.9 |
| 2020 | 8 | 15 | 18 | 24.8 | 76  | 461 | 199 | 998 | 28.1 | 214 | 1.5 |
| 2020 | 8 | 15 | 19 | 24.5 | 23  | 126 | 30  | 998 | 25.8 | 201 | 0.9 |
| 2020 | 8 | 15 | 20 | 23.9 | 0   | 0   | 0   | 998 | 24.9 | 189 | 1   |
| 2020 | 8 | 15 | 21 | 23.5 | 0   | 0   | 0   | 999 | 24.1 | 183 | 1.1 |
| 2020 | 8 | 15 | 22 | 23.2 | 0   | 0   | 0   | 999 | 23.6 | 183 | 1.2 |
| 2020 | 8 | 15 | 23 | 23   | 0   | 0   | 0   | 999 | 23.1 | 185 | 1.2 |

|      |   |    |    |      |     |     |     |      |      |     |     |
|------|---|----|----|------|-----|-----|-----|------|------|-----|-----|
| 2020 | 8 | 16 | 0  | 22.7 | 0   | 0   | 0   | 999  | 22.7 | 188 | 1.1 |
| 2020 | 8 | 16 | 1  | 22.5 | 0   | 0   | 0   | 999  | 22.5 | 193 | 1   |
| 2020 | 8 | 16 | 2  | 22.3 | 0   | 0   | 0   | 999  | 22.3 | 196 | 1   |
| 2020 | 8 | 16 | 3  | 22.2 | 0   | 0   | 0   | 999  | 22.2 | 196 | 1   |
| 2020 | 8 | 16 | 4  | 22.1 | 0   | 0   | 0   | 999  | 22.1 | 195 | 1   |
| 2020 | 8 | 16 | 5  | 22   | 0   | 0   | 0   | 999  | 22   | 193 | 1   |
| 2020 | 8 | 16 | 6  | 23.6 | 0   | 0   | 0   | 1000 | 23.6 | 189 | 1.3 |
| 2020 | 8 | 16 | 7  | 24.9 | 64  | 409 | 152 | 1000 | 25.6 | 188 | 2.2 |
| 2020 | 8 | 16 | 8  | 25.4 | 99  | 605 | 352 | 1000 | 27.1 | 208 | 2.7 |
| 2020 | 8 | 16 | 9  | 25.9 | 124 | 708 | 549 | 1000 | 28.4 | 218 | 2.9 |
| 2020 | 8 | 16 | 10 | 26.2 | 142 | 768 | 720 | 1000 | 29.3 | 224 | 2.9 |
| 2020 | 8 | 16 | 11 | 26.4 | 154 | 803 | 846 | 999  | 30.1 | 225 | 2.9 |
| 2020 | 8 | 16 | 12 | 26.6 | 154 | 829 | 917 | 999  | 30.7 | 226 | 2.8 |
| 2020 | 8 | 16 | 13 | 26.7 | 155 | 830 | 924 | 999  | 31   | 229 | 2.7 |
| 2020 | 8 | 16 | 14 | 26.5 | 152 | 815 | 868 | 999  | 31.1 | 232 | 2.6 |
| 2020 | 8 | 16 | 15 | 26.3 | 140 | 788 | 755 | 998  | 30.9 | 235 | 2.5 |
| 2020 | 8 | 16 | 16 | 26.1 | 123 | 738 | 595 | 998  | 30.4 | 237 | 2.3 |
| 2020 | 8 | 16 | 17 | 26.3 | 103 | 647 | 401 | 998  | 29.7 | 238 | 1.8 |
| 2020 | 8 | 16 | 18 | 26.2 | 73  | 471 | 196 | 999  | 28.5 | 237 | 1.3 |
| 2020 | 8 | 16 | 19 | 25.6 | 21  | 113 | 28  | 999  | 26.4 | 232 | 0.8 |
| 2020 | 8 | 16 | 20 | 25   | 0   | 0   | 0   | 1000 | 25.6 | 223 | 0.8 |
| 2020 | 8 | 16 | 21 | 24.6 | 0   | 0   | 0   | 1000 | 25   | 215 | 0.8 |
| 2020 | 8 | 16 | 22 | 24.3 | 0   | 0   | 0   | 1000 | 24.4 | 211 | 0.8 |
| 2020 | 8 | 16 | 23 | 23.9 | 0   | 0   | 0   | 1001 | 23.9 | 209 | 0.8 |
| 2020 | 8 | 17 | 0  | 23.5 | 0   | 0   | 0   | 1001 | 23.5 | 210 | 0.8 |
| 2020 | 8 | 17 | 1  | 23.2 | 0   | 0   | 0   | 1001 | 23.2 | 215 | 0.8 |
| 2020 | 8 | 17 | 2  | 23   | 0   | 0   | 0   | 1000 | 23   | 222 | 0.9 |
| 2020 | 8 | 17 | 3  | 22.9 | 0   | 0   | 0   | 1000 | 22.9 | 230 | 0.9 |
| 2020 | 8 | 17 | 4  | 22.9 | 0   | 0   | 0   | 1001 | 22.9 | 233 | 0.9 |
| 2020 | 8 | 17 | 5  | 22.9 | 0   | 0   | 0   | 1001 | 22.9 | 233 | 0.9 |
| 2020 | 8 | 17 | 6  | 24.1 | 0   | 0   | 0   | 1002 | 24.1 | 228 | 0.8 |
| 2020 | 8 | 17 | 7  | 25.2 | 62  | 431 | 154 | 1002 | 26.1 | 231 | 1.7 |
| 2020 | 8 | 17 | 8  | 25.4 | 88  | 655 | 361 | 1002 | 27.3 | 237 | 1.9 |
| 2020 | 8 | 17 | 9  | 25.4 | 102 | 772 | 564 | 1002 | 28.4 | 238 | 1.8 |
| 2020 | 8 | 17 | 10 | 25.4 | 111 | 836 | 738 | 1002 | 29.4 | 239 | 1.7 |
| 2020 | 8 | 17 | 11 | 25.5 | 117 | 869 | 864 | 1002 | 30.2 | 243 | 1.6 |
| 2020 | 8 | 17 | 12 | 25.8 | 127 | 876 | 931 | 1001 | 30.7 | 249 | 1.6 |
| 2020 | 8 | 17 | 13 | 25.9 | 127 | 875 | 937 | 1001 | 31.1 | 254 | 1.7 |
| 2020 | 8 | 17 | 14 | 25.9 | 126 | 860 | 880 | 1001 | 31.3 | 260 | 1.7 |
| 2020 | 8 | 17 | 15 | 25.9 | 121 | 824 | 763 | 1001 | 31.1 | 264 | 1.6 |
| 2020 | 8 | 17 | 16 | 25.7 | 114 | 762 | 598 | 1001 | 30.8 | 267 | 1.6 |
| 2020 | 8 | 17 | 17 | 26   | 98  | 660 | 401 | 1001 | 30.2 | 269 | 1.2 |
| 2020 | 8 | 17 | 18 | 25.7 | 70  | 479 | 194 | 1001 | 29.1 | 272 | 1.1 |
| 2020 | 8 | 17 | 19 | 25.7 | 20  | 116 | 26  | 1001 | 26.7 | 277 | 0.9 |
| 2020 | 8 | 17 | 20 | 25   | 0   | 0   | 0   | 1001 | 25.7 | 284 | 1   |
| 2020 | 8 | 17 | 21 | 24.6 | 0   | 0   | 0   | 1001 | 24.9 | 292 | 1   |
| 2020 | 8 | 17 | 22 | 24.3 | 0   | 0   | 0   | 1001 | 24.3 | 301 | 0.9 |
| 2020 | 8 | 17 | 23 | 23.8 | 0   | 0   | 0   | 1001 | 23.8 | 311 | 0.8 |
| 2020 | 8 | 18 | 0  | 23.5 | 0   | 0   | 0   | 1001 | 23.5 | 321 | 0.7 |
| 2020 | 8 | 18 | 1  | 23.2 | 0   | 0   | 0   | 1001 | 23.2 | 329 | 0.8 |

|      |   |    |    |      |     |     |     |      |      |     |     |
|------|---|----|----|------|-----|-----|-----|------|------|-----|-----|
| 2020 | 8 | 18 | 2  | 23   | 0   | 0   | 0   | 1001 | 23   | 335 | 0.8 |
| 2020 | 8 | 18 | 3  | 22.8 | 0   | 0   | 0   | 1001 | 22.8 | 341 | 0.8 |
| 2020 | 8 | 18 | 4  | 22.4 | 0   | 0   | 0   | 1001 | 22.4 | 345 | 0.9 |
| 2020 | 8 | 18 | 5  | 22.1 | 0   | 0   | 0   | 1001 | 22.1 | 351 | 0.9 |
| 2020 | 8 | 18 | 6  | 23.1 | 0   | 0   | 0   | 1002 | 23.1 | 357 | 0.9 |
| 2020 | 8 | 18 | 7  | 24.1 | 61  | 427 | 152 | 1002 | 25.1 | 358 | 1.7 |
| 2020 | 8 | 18 | 8  | 24.3 | 90  | 646 | 357 | 1002 | 26.5 | 352 | 1.7 |
| 2020 | 8 | 18 | 9  | 24.4 | 105 | 762 | 560 | 1002 | 27.8 | 349 | 1.7 |
| 2020 | 8 | 18 | 10 | 24.5 | 114 | 826 | 732 | 1002 | 28.9 | 347 | 1.7 |
| 2020 | 8 | 18 | 11 | 24.6 | 119 | 864 | 860 | 1002 | 29.8 | 345 | 1.6 |
| 2020 | 8 | 18 | 12 | 24.7 | 121 | 881 | 929 | 1001 | 30.5 | 339 | 1.5 |
| 2020 | 8 | 18 | 13 | 24.8 | 121 | 884 | 936 | 1000 | 30.9 | 326 | 1.5 |
| 2020 | 8 | 18 | 14 | 24.7 | 118 | 870 | 879 | 1000 | 31.1 | 313 | 1.6 |
| 2020 | 8 | 18 | 15 | 24.7 | 113 | 839 | 764 | 999  | 30.9 | 304 | 1.7 |
| 2020 | 8 | 18 | 16 | 24.7 | 103 | 784 | 598 | 999  | 30.4 | 300 | 1.7 |
| 2020 | 8 | 18 | 17 | 25.1 | 87  | 692 | 402 | 999  | 29.9 | 299 | 1.4 |
| 2020 | 8 | 18 | 18 | 24.8 | 62  | 519 | 195 | 999  | 28.4 | 299 | 1.2 |
| 2020 | 8 | 18 | 19 | 24.1 | 17  | 141 | 24  | 1000 | 25.9 | 301 | 0.9 |
| 2020 | 8 | 18 | 20 | 23.4 | 0   | 0   | 0   | 1000 | 25   | 307 | 0.9 |
| 2020 | 8 | 18 | 21 | 22.9 | 0   | 0   | 0   | 1000 | 24.4 | 315 | 0.9 |
| 2020 | 8 | 18 | 22 | 22.4 | 0   | 0   | 0   | 1000 | 23.8 | 321 | 0.9 |
| 2020 | 8 | 18 | 23 | 22   | 0   | 0   | 0   | 1000 | 23.5 | 325 | 0.9 |
| 2020 | 8 | 19 | 0  | 21.6 | 0   | 0   | 0   | 1000 | 23.1 | 329 | 0.9 |
| 2020 | 8 | 19 | 1  | 21.3 | 0   | 0   | 0   | 1000 | 22.6 | 333 | 0.9 |
| 2020 | 8 | 19 | 2  | 21   | 0   | 0   | 0   | 1000 | 22.1 | 338 | 0.9 |
| 2020 | 8 | 19 | 3  | 20.7 | 0   | 0   | 0   | 1000 | 21.7 | 344 | 0.9 |
| 2020 | 8 | 19 | 4  | 20.4 | 0   | 0   | 0   | 1000 | 21.3 | 350 | 0.9 |
| 2020 | 8 | 19 | 5  | 20.1 | 0   | 0   | 0   | 1000 | 20.9 | 357 | 0.9 |
| 2020 | 8 | 19 | 6  | 21   | 0   | 0   | 0   | 1000 | 21.7 | 5   | 0.8 |
| 2020 | 8 | 19 | 7  | 21.3 | 58  | 445 | 151 | 1000 | 23.6 | 11  | 1.4 |
| 2020 | 8 | 19 | 8  | 21.8 | 88  | 653 | 357 | 1000 | 25.6 | 358 | 1.5 |
| 2020 | 8 | 19 | 9  | 22.5 | 107 | 758 | 559 | 1000 | 27.2 | 349 | 1.4 |
| 2020 | 8 | 19 | 10 | 23.2 | 123 | 811 | 728 | 1000 | 28.5 | 338 | 1.4 |
| 2020 | 8 | 19 | 11 | 23.6 | 134 | 841 | 853 | 999  | 29.5 | 325 | 1.4 |
| 2020 | 8 | 19 | 12 | 23.9 | 137 | 858 | 922 | 999  | 30.3 | 316 | 1.5 |
| 2020 | 8 | 19 | 13 | 24.3 | 132 | 865 | 928 | 998  | 30.8 | 309 | 1.6 |
| 2020 | 8 | 19 | 14 | 24.7 | 125 | 856 | 871 | 998  | 30.9 | 306 | 1.9 |
| 2020 | 8 | 19 | 15 | 24.8 | 118 | 826 | 756 | 998  | 30.7 | 308 | 2.1 |
| 2020 | 8 | 19 | 16 | 24.9 | 109 | 766 | 591 | 997  | 30.2 | 312 | 2.1 |
| 2020 | 8 | 19 | 17 | 25.2 | 94  | 664 | 394 | 998  | 29.4 | 317 | 1.7 |
| 2020 | 8 | 19 | 18 | 25.1 | 64  | 495 | 188 | 998  | 27.7 | 320 | 1.2 |
| 2020 | 8 | 19 | 19 | 23.9 | 16  | 124 | 22  | 998  | 25.4 | 321 | 0.9 |
| 2020 | 8 | 19 | 20 | 23.2 | 0   | 0   | 0   | 999  | 24.5 | 325 | 0.9 |
| 2020 | 8 | 19 | 21 | 22.8 | 0   | 0   | 0   | 999  | 23.9 | 329 | 0.9 |
| 2020 | 8 | 19 | 22 | 22.5 | 0   | 0   | 0   | 1000 | 23.3 | 331 | 0.9 |
| 2020 | 8 | 19 | 23 | 22.3 | 0   | 0   | 0   | 1000 | 22.7 | 333 | 0.9 |
| 2020 | 8 | 20 | 0  | 22.2 | 0   | 0   | 0   | 1000 | 22.3 | 335 | 0.9 |
| 2020 | 8 | 20 | 1  | 21.8 | 0   | 0   | 0   | 1000 | 21.8 | 338 | 0.9 |
| 2020 | 8 | 20 | 2  | 21.5 | 0   | 0   | 0   | 1000 | 21.5 | 342 | 0.9 |
| 2020 | 8 | 20 | 3  | 21.2 | 0   | 0   | 0   | 999  | 21.2 | 348 | 0.9 |

|      |   |    |    |      |     |     |     |      |      |     |     |
|------|---|----|----|------|-----|-----|-----|------|------|-----|-----|
| 2020 | 8 | 20 | 4  | 21.1 | 0   | 0   | 0   | 999  | 21.1 | 356 | 0.9 |
| 2020 | 8 | 20 | 5  | 21   | 0   | 0   | 0   | 1000 | 21   | 1   | 0.9 |
| 2020 | 8 | 20 | 6  | 22   | 0   | 0   | 0   | 1000 | 22   | 6   | 0.8 |
| 2020 | 8 | 20 | 7  | 23   | 49  | 497 | 153 | 1000 | 24.2 | 5   | 1.4 |
| 2020 | 8 | 20 | 8  | 23   | 72  | 703 | 360 | 1001 | 25.9 | 353 | 1.4 |
| 2020 | 8 | 20 | 9  | 23.2 | 84  | 807 | 563 | 1001 | 27.5 | 347 | 1.6 |
| 2020 | 8 | 20 | 10 | 23.7 | 94  | 861 | 734 | 1000 | 28.7 | 344 | 1.6 |
| 2020 | 8 | 20 | 11 | 24.1 | 100 | 890 | 859 | 1000 | 29.7 | 341 | 1.5 |
| 2020 | 8 | 20 | 12 | 24.4 | 99  | 910 | 929 | 999  | 30.5 | 337 | 1.3 |
| 2020 | 8 | 20 | 13 | 24.4 | 100 | 910 | 935 | 999  | 31.2 | 324 | 1   |
| 2020 | 8 | 20 | 14 | 24.5 | 98  | 897 | 878 | 999  | 31.5 | 294 | 1   |
| 2020 | 8 | 20 | 15 | 24.6 | 94  | 868 | 762 | 999  | 31.4 | 278 | 1.3 |
| 2020 | 8 | 20 | 16 | 24.8 | 87  | 813 | 596 | 999  | 30.8 | 279 | 1.6 |
| 2020 | 8 | 20 | 17 | 25.1 | 75  | 720 | 397 | 999  | 30.2 | 285 | 1.5 |
| 2020 | 8 | 20 | 18 | 25   | 55  | 542 | 189 | 999  | 28.3 | 290 | 1.2 |
| 2020 | 8 | 20 | 19 | 24.2 | 14  | 142 | 20  | 1000 | 25.5 | 297 | 1   |
| 2020 | 8 | 20 | 20 | 23.6 | 0   | 0   | 0   | 1000 | 24.5 | 308 | 1   |
| 2020 | 8 | 20 | 21 | 23.3 | 0   | 0   | 0   | 1001 | 23.8 | 322 | 1   |
| 2020 | 8 | 20 | 22 | 23.1 | 0   | 0   | 0   | 1001 | 23.2 | 334 | 1   |
| 2020 | 8 | 20 | 23 | 22.7 | 0   | 0   | 0   | 1001 | 22.7 | 345 | 1   |
| 2020 | 8 | 21 | 0  | 22.3 | 0   | 0   | 0   | 1001 | 22.3 | 359 | 0.9 |
| 2020 | 8 | 21 | 1  | 21.9 | 0   | 0   | 0   | 1001 | 21.9 | 11  | 0.9 |
| 2020 | 8 | 21 | 2  | 21.5 | 0   | 0   | 0   | 1001 | 21.5 | 22  | 0.9 |
| 2020 | 8 | 21 | 3  | 21.2 | 0   | 0   | 0   | 1001 | 21.2 | 34  | 0.9 |
| 2020 | 8 | 21 | 4  | 21   | 0   | 0   | 0   | 1001 | 21   | 48  | 0.9 |
| 2020 | 8 | 21 | 5  | 20.8 | 0   | 0   | 0   | 1001 | 20.8 | 64  | 0.9 |
| 2020 | 8 | 21 | 6  | 21.7 | 0   | 0   | 0   | 1001 | 21.9 | 82  | 0.9 |
| 2020 | 8 | 21 | 7  | 22.6 | 55  | 433 | 144 | 1002 | 23.9 | 99  | 1.8 |
| 2020 | 8 | 21 | 8  | 23.7 | 88  | 630 | 345 | 1002 | 26.1 | 118 | 1.6 |
| 2020 | 8 | 21 | 9  | 24.3 | 113 | 727 | 543 | 1002 | 28.2 | 136 | 1.3 |
| 2020 | 8 | 21 | 10 | 24.8 | 132 | 778 | 710 | 1002 | 29.3 | 147 | 1   |
| 2020 | 8 | 21 | 11 | 25.3 | 148 | 804 | 833 | 1002 | 30.2 | 153 | 0.9 |
| 2020 | 8 | 21 | 12 | 25.6 | 173 | 796 | 898 | 1001 | 30.9 | 150 | 0.8 |
| 2020 | 8 | 21 | 13 | 25.8 | 175 | 796 | 903 | 1001 | 31.4 | 145 | 0.8 |
| 2020 | 8 | 21 | 14 | 25.8 | 171 | 778 | 845 | 1001 | 31.6 | 144 | 0.7 |
| 2020 | 8 | 21 | 15 | 25.7 | 164 | 737 | 729 | 1000 | 31.6 | 146 | 0.7 |
| 2020 | 8 | 21 | 16 | 25.5 | 150 | 667 | 565 | 1000 | 31.4 | 150 | 0.6 |
| 2020 | 8 | 21 | 17 | 25.9 | 126 | 554 | 372 | 1000 | 30.7 | 149 | 0.4 |
| 2020 | 8 | 21 | 18 | 25.4 | 83  | 363 | 171 | 1000 | 29.4 | 138 | 0.6 |
| 2020 | 8 | 21 | 19 | 24.7 | 13  | 45  | 15  | 1001 | 27.8 | 167 | 0.6 |
| 2020 | 8 | 21 | 20 | 24.4 | 0   | 0   | 0   | 1001 | 26.4 | 179 | 0.8 |
| 2020 | 8 | 21 | 21 | 24.3 | 0   | 0   | 0   | 1001 | 25.2 | 179 | 0.9 |
| 2020 | 8 | 21 | 22 | 24.2 | 0   | 0   | 0   | 1001 | 24.4 | 176 | 0.9 |
| 2020 | 8 | 21 | 23 | 24   | 0   | 0   | 0   | 1001 | 24   | 174 | 0.9 |
| 2020 | 8 | 22 | 0  | 23.7 | 0   | 0   | 0   | 1001 | 23.7 | 166 | 0.9 |
| 2020 | 8 | 22 | 1  | 23.3 | 0   | 0   | 0   | 1001 | 23.3 | 150 | 0.8 |
| 2020 | 8 | 22 | 2  | 23   | 0   | 0   | 0   | 1001 | 23   | 133 | 0.8 |
| 2020 | 8 | 22 | 3  | 22.9 | 0   | 0   | 0   | 1001 | 22.9 | 117 | 0.8 |
| 2020 | 8 | 22 | 4  | 22.8 | 0   | 0   | 0   | 1001 | 22.8 | 107 | 0.9 |
| 2020 | 8 | 22 | 5  | 22.8 | 0   | 0   | 0   | 1001 | 22.8 | 104 | 1.1 |



|      |   |    |    |      |     |     |     |      |      |     |     |
|------|---|----|----|------|-----|-----|-----|------|------|-----|-----|
| 2020 | 8 | 22 | 6  | 23.1 | 0   | 0   | 0   | 1002 | 23.3 | 104 | 1.6 |
| 2020 | 8 | 22 | 7  | 23.4 | 73  | 107 | 95  | 1002 | 24.2 | 106 | 2.6 |
| 2020 | 8 | 22 | 8  | 23.6 | 162 | 195 | 241 | 1002 | 25   | 106 | 2.8 |
| 2020 | 8 | 22 | 9  | 23.7 | 184 | 7   | 188 | 1002 | 25.8 | 105 | 2.7 |
| 2020 | 8 | 22 | 10 | 23.9 | 331 | 71  | 383 | 1001 | 26.7 | 103 | 2.5 |
| 2020 | 8 | 22 | 11 | 24.1 | 375 | 54  | 421 | 1001 | 27.5 | 103 | 2.2 |
| 2020 | 8 | 22 | 12 | 24.1 | 445 | 248 | 671 | 1000 | 27.8 | 108 | 2   |
| 2020 | 8 | 22 | 13 | 24.1 | 433 | 308 | 714 | 1000 | 27.9 | 118 | 1.8 |
| 2020 | 8 | 22 | 14 | 24.1 | 414 | 262 | 641 | 999  | 28.2 | 128 | 1.8 |
| 2020 | 8 | 22 | 15 | 24.2 | 304 | 33  | 329 | 999  | 28.4 | 139 | 1.7 |
| 2020 | 8 | 22 | 16 | 24.2 | 259 | 307 | 449 | 999  | 28.3 | 151 | 1.5 |
| 2020 | 8 | 22 | 17 | 24.5 | 183 | 128 | 239 | 998  | 27.8 | 160 | 1.3 |
| 2020 | 8 | 22 | 18 | 24.6 | 50  | 0   | 50  | 998  | 26.8 | 165 | 0.9 |
| 2020 | 8 | 22 | 19 | 23.9 | 5   | 0   | 5   | 998  | 25.3 | 164 | 0.7 |
| 2020 | 8 | 22 | 20 | 23.5 | 0   | 0   | 0   | 999  | 25   | 159 | 0.6 |
| 2020 | 8 | 22 | 21 | 23.1 | 0   | 0   | 0   | 999  | 24.8 | 144 | 0.5 |
| 2020 | 8 | 22 | 22 | 22.9 | 0   | 0   | 0   | 999  | 24.4 | 120 | 0.5 |
| 2020 | 8 | 22 | 23 | 22.8 | 0   | 0   | 0   | 998  | 23.8 | 113 | 0.6 |
| 2020 | 8 | 23 | 0  | 22.8 | 0   | 0   | 0   | 998  | 23.1 | 118 | 0.7 |
| 2020 | 8 | 23 | 1  | 22.6 | 0   | 0   | 0   | 997  | 22.6 | 123 | 0.7 |
| 2020 | 8 | 23 | 2  | 22.3 | 0   | 0   | 0   | 997  | 22.3 | 126 | 0.8 |
| 2020 | 8 | 23 | 3  | 22.1 | 0   | 0   | 0   | 997  | 22.1 | 128 | 0.8 |
| 2020 | 8 | 23 | 4  | 22.1 | 0   | 0   | 0   | 997  | 22.1 | 130 | 0.8 |
| 2020 | 8 | 23 | 5  | 22   | 0   | 0   | 0   | 997  | 22   | 128 | 0.8 |
| 2020 | 8 | 23 | 6  | 22.8 | 0   | 0   | 0   | 997  | 22.8 | 123 | 0.8 |
| 2020 | 8 | 23 | 7  | 23.4 | 71  | 42  | 80  | 998  | 24.1 | 116 | 1.4 |
| 2020 | 8 | 23 | 8  | 23.5 | 124 | 496 | 324 | 998  | 25.7 | 110 | 1.3 |
| 2020 | 8 | 23 | 9  | 23.4 | 257 | 96  | 313 | 997  | 27.5 | 104 | 0.6 |
| 2020 | 8 | 23 | 10 | 23.3 | 341 | 242 | 520 | 997  | 28.9 | 97  | 0.1 |
| 2020 | 8 | 23 | 11 | 23.7 | 412 | 220 | 599 | 996  | 29.8 | 260 | 0.2 |
| 2020 | 8 | 23 | 12 | 24   | 227 | 710 | 870 | 996  | 30.3 | 254 | 0.6 |
| 2020 | 8 | 23 | 13 | 24.2 | 233 | 702 | 873 | 995  | 30.5 | 245 | 1.1 |
| 2020 | 8 | 23 | 14 | 24.3 | 232 | 675 | 814 | 995  | 30.5 | 241 | 1.4 |
| 2020 | 8 | 23 | 15 | 24.3 | 222 | 627 | 698 | 995  | 30.2 | 243 | 1.5 |
| 2020 | 8 | 23 | 16 | 24.3 | 195 | 559 | 539 | 994  | 29.8 | 245 | 1.4 |
| 2020 | 8 | 23 | 17 | 24.8 | 143 | 5   | 145 | 994  | 29.2 | 251 | 0.9 |
| 2020 | 8 | 23 | 18 | 24.7 | 94  | 258 | 155 | 994  | 28.2 | 253 | 0.6 |
| 2020 | 8 | 23 | 19 | 24.5 | 7   | 0   | 7   | 994  | 26.5 | 275 | 0.4 |
| 2020 | 8 | 23 | 20 | 24   | 0   | 0   | 0   | 995  | 25.7 | 304 | 0.3 |
| 2020 | 8 | 23 | 21 | 23.6 | 0   | 0   | 0   | 996  | 25.2 | 325 | 0.3 |
| 2020 | 8 | 23 | 22 | 23.2 | 0   | 0   | 0   | 996  | 24.9 | 343 | 0.3 |
| 2020 | 8 | 23 | 23 | 22.7 | 0   | 0   | 0   | 996  | 24.9 | 71  | 0.2 |
| 2020 | 8 | 24 | 0  | 22.6 | 0   | 0   | 0   | 995  | 24.4 | 100 | 0.4 |
| 2020 | 8 | 24 | 1  | 22.5 | 0   | 0   | 0   | 995  | 23.8 | 100 | 0.6 |
| 2020 | 8 | 24 | 2  | 22.3 | 0   | 0   | 0   | 994  | 23.1 | 108 | 0.7 |
| 2020 | 8 | 24 | 3  | 22.2 | 0   | 0   | 0   | 994  | 22.5 | 119 | 0.8 |
| 2020 | 8 | 24 | 4  | 22.1 | 0   | 0   | 0   | 994  | 22.1 | 127 | 0.9 |
| 2020 | 8 | 24 | 5  | 22   | 0   | 0   | 0   | 994  | 22   | 131 | 1   |
| 2020 | 8 | 24 | 6  | 23   | 0   | 0   | 0   | 994  | 23   | 133 | 1.5 |
| 2020 | 8 | 24 | 7  | 23.8 | 72  | 273 | 127 | 994  | 24.8 | 134 | 2.5 |

|      |   |    |    |      |     |     |     |     |      |     |     |
|------|---|----|----|------|-----|-----|-----|-----|------|-----|-----|
| 2020 | 8 | 24 | 8  | 24.2 | 122 | 499 | 322 | 994 | 26.4 | 139 | 2.7 |
| 2020 | 8 | 24 | 9  | 24.5 | 150 | 630 | 518 | 994 | 27.7 | 143 | 2.8 |
| 2020 | 8 | 24 | 10 | 24.7 | 166 | 709 | 688 | 994 | 28.8 | 148 | 2.8 |
| 2020 | 8 | 24 | 11 | 25   | 175 | 755 | 813 | 994 | 29.7 | 154 | 2.7 |
| 2020 | 8 | 24 | 12 | 25.2 | 167 | 795 | 886 | 993 | 30.4 | 160 | 2.6 |
| 2020 | 8 | 24 | 13 | 25.4 | 165 | 800 | 892 | 993 | 30.8 | 165 | 2.5 |
| 2020 | 8 | 24 | 14 | 25.5 | 159 | 789 | 836 | 992 | 31   | 170 | 2.4 |
| 2020 | 8 | 24 | 15 | 25.5 | 149 | 755 | 721 | 992 | 30.9 | 172 | 2.3 |
| 2020 | 8 | 24 | 16 | 25.8 | 131 | 697 | 558 | 992 | 30.4 | 168 | 1.9 |
| 2020 | 8 | 24 | 17 | 25.6 | 104 | 600 | 364 | 992 | 29.7 | 162 | 1.7 |
| 2020 | 8 | 24 | 18 | 25.9 | 69  | 408 | 163 | 992 | 27.9 | 155 | 1.2 |
| 2020 | 8 | 24 | 19 | 25   | 10  | 39  | 11  | 992 | 26.1 | 149 | 1   |
| 2020 | 8 | 24 | 20 | 24.6 | 0   | 0   | 0   | 993 | 25.4 | 142 | 1.1 |
| 2020 | 8 | 24 | 21 | 24.2 | 0   | 0   | 0   | 993 | 24.8 | 136 | 1.2 |
| 2020 | 8 | 24 | 22 | 24   | 0   | 0   | 0   | 993 | 24.4 | 130 | 1.4 |
| 2020 | 8 | 24 | 23 | 24   | 0   | 0   | 0   | 993 | 24.1 | 127 | 1.7 |
| 2020 | 8 | 25 | 0  | 24   | 0   | 0   | 0   | 992 | 24   | 126 | 2.1 |
| 2020 | 8 | 25 | 1  | 24.1 | 0   | 0   | 0   | 992 | 24.1 | 125 | 2.3 |
| 2020 | 8 | 25 | 2  | 23.9 | 0   | 0   | 0   | 992 | 23.9 | 121 | 2.1 |
| 2020 | 8 | 25 | 3  | 23.8 | 0   | 0   | 0   | 992 | 23.8 | 118 | 2   |
| 2020 | 8 | 25 | 4  | 23.6 | 0   | 0   | 0   | 992 | 23.6 | 115 | 1.9 |
| 2020 | 8 | 25 | 5  | 23.4 | 0   | 0   | 0   | 992 | 23.4 | 116 | 1.9 |
| 2020 | 8 | 25 | 6  | 23.9 | 0   | 0   | 0   | 993 | 24.1 | 116 | 2.4 |
| 2020 | 8 | 25 | 7  | 24.7 | 60  | 360 | 131 | 993 | 25.6 | 114 | 2.9 |
| 2020 | 8 | 25 | 8  | 25.2 | 99  | 574 | 328 | 993 | 27.3 | 115 | 3.2 |
| 2020 | 8 | 25 | 9  | 25.4 | 128 | 679 | 523 | 993 | 28.8 | 118 | 3.7 |
| 2020 | 8 | 25 | 10 | 25.6 | 151 | 734 | 690 | 993 | 29.7 | 120 | 4.1 |
| 2020 | 8 | 25 | 11 | 25.9 | 169 | 762 | 812 | 993 | 30.4 | 123 | 4.4 |
| 2020 | 8 | 25 | 12 | 26   | 389 | 43  | 427 | 992 | 30.8 | 124 | 4.5 |
| 2020 | 8 | 25 | 13 | 26.1 | 139 | 1   | 140 | 992 | 31   | 124 | 4.5 |
| 2020 | 8 | 25 | 14 | 26   | 150 | 798 | 832 | 991 | 31   | 124 | 4.3 |
| 2020 | 8 | 25 | 15 | 25.9 | 142 | 761 | 716 | 991 | 30.7 | 123 | 4.1 |
| 2020 | 8 | 25 | 16 | 25.9 | 130 | 693 | 552 | 991 | 30.2 | 120 | 3.6 |
| 2020 | 8 | 25 | 17 | 26   | 108 | 580 | 357 | 991 | 29.4 | 113 | 2.8 |
| 2020 | 8 | 25 | 18 | 26   | 71  | 378 | 157 | 991 | 27.8 | 102 | 1.8 |
| 2020 | 8 | 25 | 19 | 24.9 | 9   | 28  | 9   | 992 | 26.2 | 94  | 1.7 |
| 2020 | 8 | 25 | 20 | 24.3 | 0   | 0   | 0   | 992 | 25.7 | 92  | 2   |
| 2020 | 8 | 25 | 21 | 23.8 | 0   | 0   | 0   | 992 | 25.4 | 94  | 2.4 |
| 2020 | 8 | 25 | 22 | 23.8 | 0   | 0   | 0   | 992 | 25.2 | 97  | 2.6 |
| 2020 | 8 | 25 | 23 | 24   | 0   | 0   | 0   | 992 | 25   | 98  | 2.6 |
| 2020 | 8 | 26 | 0  | 24.3 | 0   | 0   | 0   | 992 | 25   | 98  | 2.8 |
| 2020 | 8 | 26 | 1  | 24.8 | 0   | 0   | 0   | 991 | 25.2 | 100 | 3.1 |
| 2020 | 8 | 26 | 2  | 25.4 | 0   | 0   | 0   | 991 | 25.4 | 101 | 3.4 |
| 2020 | 8 | 26 | 3  | 25.6 | 0   | 0   | 0   | 991 | 25.7 | 107 | 4   |
| 2020 | 8 | 26 | 4  | 25.7 | 0   | 0   | 0   | 990 | 25.7 | 110 | 4.2 |
| 2020 | 8 | 26 | 5  | 25.7 | 0   | 0   | 0   | 990 | 25.8 | 111 | 4.3 |
| 2020 | 8 | 26 | 6  | 25.9 | 0   | 0   | 0   | 990 | 26   | 112 | 4.4 |
| 2020 | 8 | 26 | 7  | 26.3 | 59  | 0   | 59  | 990 | 26.5 | 113 | 4.7 |
| 2020 | 8 | 26 | 8  | 26.8 | 161 | 158 | 224 | 990 | 27.3 | 113 | 5.1 |
| 2020 | 8 | 26 | 9  | 26.9 | 249 | 252 | 396 | 990 | 27.9 | 117 | 6.2 |

|      |   |    |    |      |     |     |     |     |      |     |      |
|------|---|----|----|------|-----|-----|-----|-----|------|-----|------|
| 2020 | 8 | 26 | 10 | 26.5 | 343 | 217 | 502 | 990 | 28.5 | 118 | 6.8  |
| 2020 | 8 | 26 | 11 | 26.2 | 248 | 13  | 259 | 989 | 28.8 | 118 | 7.4  |
| 2020 | 8 | 26 | 12 | 25.9 | 257 | 13  | 269 | 988 | 29   | 117 | 7.9  |
| 2020 | 8 | 26 | 13 | 25.7 | 345 | 26  | 369 | 987 | 29   | 117 | 8.3  |
| 2020 | 8 | 26 | 14 | 25.4 | 243 | 12  | 253 | 986 | 28.5 | 118 | 8.6  |
| 2020 | 8 | 26 | 15 | 25.2 | 86  | 0   | 86  | 985 | 27.6 | 119 | 8.7  |
| 2020 | 8 | 26 | 16 | 25.4 | 33  | 0   | 33  | 985 | 27   | 118 | 9    |
| 2020 | 8 | 26 | 17 | 25.4 | 128 | 0   | 128 | 984 | 26.5 | 120 | 9.5  |
| 2020 | 8 | 26 | 18 | 25.5 | 38  | 0   | 38  | 983 | 26.2 | 122 | 9.7  |
| 2020 | 8 | 26 | 19 | 25.7 | 1   | 0   | 1   | 983 | 26.3 | 128 | 10.1 |
| 2020 | 8 | 26 | 20 | 25.7 | 0   | 0   | 0   | 984 | 26.2 | 135 | 10   |
| 2020 | 8 | 26 | 21 | 25.6 | 0   | 0   | 0   | 984 | 26.2 | 142 | 9.8  |
| 2020 | 8 | 26 | 22 | 25.6 | 0   | 0   | 0   | 984 | 26.2 | 149 | 9.6  |
| 2020 | 8 | 26 | 23 | 25.7 | 0   | 0   | 0   | 985 | 26.2 | 154 | 9.4  |
| 2020 | 8 | 27 | 0  | 25.7 | 0   | 0   | 0   | 985 | 26.2 | 159 | 8.9  |
| 2020 | 8 | 27 | 1  | 25.7 | 0   | 0   | 0   | 985 | 26.2 | 164 | 8.4  |
| 2020 | 8 | 27 | 2  | 25.7 | 0   | 0   | 0   | 986 | 26.2 | 170 | 7.8  |
| 2020 | 8 | 27 | 3  | 25.7 | 0   | 0   | 0   | 986 | 26.1 | 174 | 7.2  |
| 2020 | 8 | 27 | 4  | 25.6 | 0   | 0   | 0   | 987 | 26   | 178 | 6.6  |
| 2020 | 8 | 27 | 5  | 25.5 | 0   | 0   | 0   | 988 | 25.9 | 181 | 6.1  |
| 2020 | 8 | 27 | 6  | 25.4 | 0   | 0   | 0   | 989 | 25.8 | 182 | 5.4  |
| 2020 | 8 | 27 | 7  | 25.8 | 69  | 74  | 83  | 989 | 26.2 | 179 | 4.9  |
| 2020 | 8 | 27 | 8  | 26.3 | 158 | 191 | 234 | 990 | 27   | 173 | 4.7  |
| 2020 | 8 | 27 | 9  | 26.6 | 257 | 166 | 354 | 990 | 27.7 | 171 | 4.6  |
| 2020 | 8 | 27 | 10 | 26.5 | 345 | 154 | 458 | 991 | 28.4 | 172 | 4.6  |
| 2020 | 8 | 27 | 11 | 26.4 | 319 | 26  | 341 | 991 | 28.8 | 172 | 4.3  |
| 2020 | 8 | 27 | 12 | 26.5 | 238 | 12  | 248 | 991 | 29   | 168 | 4    |
| 2020 | 8 | 27 | 13 | 26.5 | 420 | 423 | 801 | 991 | 29.1 | 161 | 3.9  |
| 2020 | 8 | 27 | 14 | 26.5 | 421 | 375 | 740 | 991 | 28.8 | 155 | 3.9  |
| 2020 | 8 | 27 | 15 | 26.7 | 330 | 62  | 377 | 991 | 28.4 | 150 | 3.5  |
| 2020 | 8 | 27 | 16 | 26.8 | 229 | 30  | 247 | 991 | 27.9 | 147 | 2.9  |
| 2020 | 8 | 27 | 17 | 26.8 | 211 | 219 | 303 | 992 | 27.5 | 141 | 2.2  |
| 2020 | 8 | 27 | 18 | 26.5 | 61  | 0   | 61  | 992 | 26.7 | 137 | 1.7  |
| 2020 | 8 | 27 | 19 | 26   | 0   | 0   | 0   | 992 | 26.1 | 136 | 1.7  |
| 2020 | 8 | 27 | 20 | 25.8 | 0   | 0   | 0   | 993 | 25.8 | 137 | 1.8  |
| 2020 | 8 | 27 | 21 | 25.6 | 0   | 0   | 0   | 993 | 25.6 | 138 | 1.7  |
| 2020 | 8 | 27 | 22 | 25.4 | 0   | 0   | 0   | 993 | 25.4 | 141 | 1.6  |
| 2020 | 8 | 27 | 23 | 25.3 | 0   | 0   | 0   | 993 | 25.3 | 144 | 1.5  |
| 2020 | 8 | 28 | 0  | 25.2 | 0   | 0   | 0   | 993 | 25.2 | 149 | 1.5  |
| 2020 | 8 | 28 | 1  | 25   | 0   | 0   | 0   | 994 | 25   | 154 | 1.5  |
| 2020 | 8 | 28 | 2  | 24.9 | 0   | 0   | 0   | 994 | 24.9 | 155 | 1.4  |
| 2020 | 8 | 28 | 3  | 24.7 | 0   | 0   | 0   | 994 | 24.7 | 153 | 1.4  |
| 2020 | 8 | 28 | 4  | 24.7 | 0   | 0   | 0   | 994 | 24.7 | 152 | 1.5  |
| 2020 | 8 | 28 | 5  | 24.7 | 0   | 0   | 0   | 994 | 24.7 | 151 | 1.5  |
| 2020 | 8 | 28 | 6  | 25   | 0   | 0   | 0   | 995 | 25   | 150 | 1.5  |
| 2020 | 8 | 28 | 7  | 25.9 | 75  | 211 | 115 | 995 | 26   | 145 | 2.1  |
| 2020 | 8 | 28 | 8  | 26.1 | 135 | 434 | 305 | 995 | 26.7 | 146 | 2.3  |
| 2020 | 8 | 28 | 9  | 26.1 | 170 | 569 | 498 | 995 | 27.3 | 147 | 2.4  |
| 2020 | 8 | 28 | 10 | 26.2 | 190 | 653 | 666 | 995 | 28   | 142 | 2.3  |
| 2020 | 8 | 28 | 11 | 26.2 | 196 | 710 | 790 | 995 | 28.8 | 138 | 2.3  |

|      |   |    |    |      |     |     |     |      |      |     |     |
|------|---|----|----|------|-----|-----|-----|------|------|-----|-----|
| 2020 | 8 | 28 | 12 | 26.2 | 203 | 731 | 856 | 995  | 29.4 | 138 | 2.2 |
| 2020 | 8 | 28 | 13 | 26.2 | 197 | 742 | 863 | 994  | 29.9 | 142 | 2.1 |
| 2020 | 8 | 28 | 14 | 26.1 | 384 | 339 | 671 | 994  | 30.2 | 147 | 2.1 |
| 2020 | 8 | 28 | 15 | 26   | 278 | 24  | 296 | 994  | 30.2 | 150 | 2.1 |
| 2020 | 8 | 28 | 16 | 26.1 | 156 | 623 | 528 | 994  | 29.8 | 152 | 2   |
| 2020 | 8 | 28 | 17 | 26.3 | 125 | 507 | 336 | 995  | 29.1 | 152 | 1.7 |
| 2020 | 8 | 28 | 18 | 26.2 | 77  | 301 | 141 | 995  | 27.7 | 149 | 1.3 |
| 2020 | 8 | 28 | 19 | 25.7 | 0   | 0   | 0   | 995  | 26.1 | 143 | 1.1 |
| 2020 | 8 | 28 | 20 | 25.5 | 0   | 0   | 0   | 996  | 25.6 | 135 | 1.2 |
| 2020 | 8 | 28 | 21 | 25.2 | 0   | 0   | 0   | 996  | 25.2 | 129 | 1.4 |
| 2020 | 8 | 28 | 22 | 25   | 0   | 0   | 0   | 996  | 25   | 122 | 1.6 |
| 2020 | 8 | 28 | 23 | 24.9 | 0   | 0   | 0   | 996  | 24.9 | 117 | 1.8 |
| 2020 | 8 | 29 | 0  | 24.9 | 0   | 0   | 0   | 996  | 24.9 | 112 | 2.1 |
| 2020 | 8 | 29 | 1  | 25   | 0   | 0   | 0   | 995  | 25   | 112 | 2.3 |
| 2020 | 8 | 29 | 2  | 25.1 | 0   | 0   | 0   | 995  | 25.1 | 116 | 2.3 |
| 2020 | 8 | 29 | 3  | 25.3 | 0   | 0   | 0   | 995  | 25.3 | 130 | 2.2 |
| 2020 | 8 | 29 | 4  | 25.4 | 0   | 0   | 0   | 995  | 25.4 | 159 | 2   |
| 2020 | 8 | 29 | 5  | 25.4 | 0   | 0   | 0   | 995  | 25.4 | 183 | 2.2 |
| 2020 | 8 | 29 | 6  | 25.4 | 0   | 0   | 0   | 996  | 25.4 | 197 | 2.4 |
| 2020 | 8 | 29 | 7  | 25.7 | 57  | 353 | 123 | 997  | 25.8 | 197 | 2.4 |
| 2020 | 8 | 29 | 8  | 25.9 | 93  | 0   | 93  | 997  | 26.4 | 195 | 2.6 |
| 2020 | 8 | 29 | 9  | 25.9 | 245 | 255 | 392 | 997  | 27.2 | 191 | 2.7 |
| 2020 | 8 | 29 | 10 | 25.9 | 120 | 783 | 688 | 998  | 28.2 | 188 | 2.7 |
| 2020 | 8 | 29 | 11 | 25.8 | 311 | 24  | 331 | 997  | 29   | 190 | 2.6 |
| 2020 | 8 | 29 | 12 | 25.8 | 142 | 821 | 873 | 997  | 29.4 | 195 | 2.6 |
| 2020 | 8 | 29 | 13 | 25.9 | 138 | 827 | 878 | 997  | 29.8 | 202 | 2.6 |
| 2020 | 8 | 29 | 14 | 25.9 | 135 | 810 | 818 | 997  | 29.7 | 209 | 2.5 |
| 2020 | 8 | 29 | 15 | 25.9 | 152 | 1   | 152 | 997  | 29.6 | 218 | 2.4 |
| 2020 | 8 | 29 | 16 | 25.8 | 158 | 0   | 158 | 997  | 29.3 | 225 | 2   |
| 2020 | 8 | 29 | 17 | 26.1 | 16  | 0   | 16  | 997  | 28.8 | 230 | 1.4 |
| 2020 | 8 | 29 | 18 | 25.8 | 7   | 0   | 7   | 997  | 27.8 | 233 | 1   |
| 2020 | 8 | 29 | 19 | 25.4 | 0   | 0   | 0   | 998  | 26.3 | 238 | 0.7 |
| 2020 | 8 | 29 | 20 | 24.9 | 0   | 0   | 0   | 998  | 25.8 | 247 | 0.7 |
| 2020 | 8 | 29 | 21 | 24.5 | 0   | 0   | 0   | 999  | 25.3 | 259 | 0.7 |
| 2020 | 8 | 29 | 22 | 24.1 | 0   | 0   | 0   | 999  | 24.8 | 266 | 0.7 |
| 2020 | 8 | 29 | 23 | 23.8 | 0   | 0   | 0   | 999  | 24.4 | 268 | 0.7 |
| 2020 | 8 | 30 | 0  | 23.6 | 0   | 0   | 0   | 999  | 24.2 | 268 | 0.6 |
| 2020 | 8 | 30 | 1  | 23.4 | 0   | 0   | 0   | 999  | 24.2 | 267 | 0.4 |
| 2020 | 8 | 30 | 2  | 23.2 | 0   | 0   | 0   | 998  | 24.4 | 252 | 0.1 |
| 2020 | 8 | 30 | 3  | 23   | 0   | 0   | 0   | 998  | 24.1 | 94  | 0.3 |
| 2020 | 8 | 30 | 4  | 22.8 | 0   | 0   | 0   | 998  | 23.6 | 91  | 0.6 |
| 2020 | 8 | 30 | 5  | 22.5 | 0   | 0   | 0   | 998  | 23.3 | 93  | 0.7 |
| 2020 | 8 | 30 | 6  | 23   | 0   | 0   | 0   | 999  | 23.6 | 93  | 0.7 |
| 2020 | 8 | 30 | 7  | 23.5 | 65  | 147 | 92  | 999  | 25.2 | 80  | 0.9 |
| 2020 | 8 | 30 | 8  | 23.6 | 72  | 661 | 329 | 1000 | 27.2 | 0   | 0.5 |
| 2020 | 8 | 30 | 9  | 24.1 | 88  | 767 | 527 | 1000 | 28.6 | 324 | 0.8 |
| 2020 | 8 | 30 | 10 | 24.5 | 99  | 824 | 695 | 1000 | 29.8 | 303 | 0.8 |
| 2020 | 8 | 30 | 11 | 24.9 | 106 | 855 | 817 | 999  | 30.6 | 275 | 0.8 |
| 2020 | 8 | 30 | 12 | 25.3 | 114 | 864 | 882 | 999  | 31.1 | 264 | 1   |
| 2020 | 8 | 30 | 13 | 25.5 | 116 | 861 | 884 | 998  | 31.4 | 270 | 1.3 |

|      |   |    |    |      |     |     |     |      |      |     |     |
|------|---|----|----|------|-----|-----|-----|------|------|-----|-----|
| 2020 | 8 | 30 | 14 | 25.6 | 115 | 843 | 823 | 998  | 31.4 | 282 | 1.5 |
| 2020 | 8 | 30 | 15 | 25.6 | 112 | 805 | 705 | 998  | 31   | 295 | 1.7 |
| 2020 | 8 | 30 | 16 | 25.7 | 104 | 737 | 539 | 998  | 30.4 | 307 | 1.9 |
| 2020 | 8 | 30 | 17 | 26.1 | 86  | 631 | 343 | 998  | 29.5 | 319 | 1.7 |
| 2020 | 8 | 30 | 18 | 25.8 | 72  | 190 | 111 | 998  | 28   | 332 | 1.5 |
| 2020 | 8 | 30 | 19 | 25.4 | 0   | 0   | 0   | 999  | 26.2 | 345 | 1.2 |
| 2020 | 8 | 30 | 20 | 24.8 | 0   | 0   | 0   | 999  | 25.5 | 0   | 1.4 |
| 2020 | 8 | 30 | 21 | 24.4 | 0   | 0   | 0   | 999  | 24.9 | 13  | 1.5 |
| 2020 | 8 | 30 | 22 | 24.2 | 0   | 0   | 0   | 999  | 24.5 | 22  | 1.5 |
| 2020 | 8 | 30 | 23 | 24.1 | 0   | 0   | 0   | 999  | 24.3 | 32  | 1.4 |
| 2020 | 8 | 31 | 0  | 24   | 0   | 0   | 0   | 999  | 24.1 | 42  | 1.3 |
| 2020 | 8 | 31 | 1  | 24   | 0   | 0   | 0   | 999  | 24   | 57  | 1.1 |
| 2020 | 8 | 31 | 2  | 23.9 | 0   | 0   | 0   | 999  | 23.9 | 75  | 1.2 |
| 2020 | 8 | 31 | 3  | 23.9 | 0   | 0   | 0   | 999  | 23.9 | 90  | 1.3 |
| 2020 | 8 | 31 | 4  | 23.8 | 0   | 0   | 0   | 999  | 23.8 | 102 | 1.5 |
| 2020 | 8 | 31 | 5  | 23.7 | 0   | 0   | 0   | 999  | 23.7 | 106 | 1.6 |
| 2020 | 8 | 31 | 6  | 24   | 0   | 0   | 0   | 1000 | 24.1 | 105 | 1.8 |
| 2020 | 8 | 31 | 7  | 24.3 | 63  | 292 | 116 | 1000 | 25.1 | 102 | 2.6 |
| 2020 | 8 | 31 | 8  | 24.6 | 104 | 537 | 311 | 1000 | 26.3 | 99  | 2.9 |
| 2020 | 8 | 31 | 9  | 25   | 123 | 676 | 509 | 1000 | 27.6 | 97  | 2.9 |
| 2020 | 8 | 31 | 10 | 25.4 | 133 | 757 | 679 | 1000 | 28.8 | 97  | 2.6 |
| 2020 | 8 | 31 | 11 | 25.8 | 136 | 806 | 804 | 999  | 29.7 | 95  | 2.4 |
| 2020 | 8 | 31 | 12 | 26.1 | 132 | 833 | 871 | 999  | 30.4 | 95  | 2.3 |
| 2020 | 8 | 31 | 13 | 26.2 | 135 | 830 | 873 | 998  | 30.8 | 99  | 2.2 |
| 2020 | 8 | 31 | 14 | 26.2 | 79  | 0   | 79  | 998  | 30.9 | 104 | 2.2 |
| 2020 | 8 | 31 | 15 | 26.1 | 213 | 9   | 219 | 997  | 30.6 | 108 | 2.2 |
| 2020 | 8 | 31 | 16 | 26.3 | 193 | 11  | 200 | 997  | 30   | 116 | 2.2 |
| 2020 | 8 | 31 | 17 | 26.7 | 57  | 0   | 57  | 998  | 29.2 | 125 | 2   |
| 2020 | 8 | 31 | 18 | 26.5 | 61  | 0   | 61  | 998  | 27.7 | 131 | 1.6 |
| 2020 | 8 | 31 | 19 | 26   | 0   | 0   | 0   | 998  | 26.3 | 131 | 1.3 |
| 2020 | 8 | 31 | 20 | 25.5 | 0   | 0   | 0   | 999  | 25.7 | 122 | 1.6 |
| 2020 | 8 | 31 | 21 | 24.7 | 0   | 0   | 0   | 999  | 24.9 | 110 | 1.8 |
| 2020 | 8 | 31 | 22 | 23.9 | 0   | 0   | 0   | 999  | 24.1 | 100 | 1.8 |
| 2020 | 8 | 31 | 23 | 23.1 | 0   | 0   | 0   | 998  | 23.2 | 95  | 1.8 |
| 2020 | 9 | 1  | 0  | 22.3 | 0   | 0   | 0   | 998  | 22.6 | 94  | 1.8 |
| 2020 | 9 | 1  | 1  | 21.8 | 0   | 0   | 0   | 998  | 22.1 | 93  | 1.9 |
| 2020 | 9 | 1  | 2  | 21.5 | 0   | 0   | 0   | 997  | 21.8 | 93  | 2.1 |
| 2020 | 9 | 1  | 3  | 21.3 | 0   | 0   | 0   | 997  | 21.6 | 95  | 2.2 |
| 2020 | 9 | 1  | 4  | 21.2 | 0   | 0   | 0   | 997  | 21.4 | 96  | 2.3 |
| 2020 | 9 | 1  | 5  | 21.1 | 0   | 0   | 0   | 997  | 21.4 | 95  | 2.3 |
| 2020 | 9 | 1  | 6  | 21.2 | 0   | 0   | 0   | 997  | 21.6 | 91  | 2.6 |
| 2020 | 9 | 1  | 7  | 22   | 55  | 353 | 119 | 997  | 22.8 | 88  | 3.2 |
| 2020 | 9 | 1  | 8  | 23   | 93  | 581 | 316 | 997  | 24.6 | 92  | 3.8 |
| 2020 | 9 | 1  | 9  | 23.8 | 118 | 690 | 510 | 997  | 26.4 | 95  | 3.8 |
| 2020 | 9 | 1  | 10 | 24.4 | 141 | 743 | 675 | 996  | 27.8 | 95  | 3.6 |
| 2020 | 9 | 1  | 11 | 25   | 162 | 763 | 793 | 996  | 28.8 | 95  | 3.3 |
| 2020 | 9 | 1  | 12 | 25.4 | 165 | 785 | 859 | 995  | 29.6 | 98  | 3   |
| 2020 | 9 | 1  | 13 | 25.6 | 420 | 302 | 688 | 995  | 30   | 105 | 2.7 |
| 2020 | 9 | 1  | 14 | 25.5 | 218 | 10  | 226 | 995  | 29.8 | 112 | 2.5 |
| 2020 | 9 | 1  | 15 | 25.6 | 180 | 5   | 184 | 994  | 29.2 | 117 | 2.1 |

|      |   |   |    |      |     |     |     |     |      |     |      |
|------|---|---|----|------|-----|-----|-----|-----|------|-----|------|
| 2020 | 9 | 1 | 16 | 25.7 | 233 | 42  | 257 | 994 | 28.5 | 118 | 1.7  |
| 2020 | 9 | 1 | 17 | 25.6 | 66  | 0   | 66  | 994 | 27.7 | 116 | 1.5  |
| 2020 | 9 | 1 | 18 | 25.9 | 66  | 2   | 66  | 994 | 26.7 | 111 | 0.8  |
| 2020 | 9 | 1 | 19 | 25.4 | 0   | 0   | 0   | 995 | 26   | 105 | 0.7  |
| 2020 | 9 | 1 | 20 | 25.1 | 0   | 0   | 0   | 995 | 25.6 | 91  | 0.8  |
| 2020 | 9 | 1 | 21 | 25   | 0   | 0   | 0   | 995 | 25.3 | 82  | 1    |
| 2020 | 9 | 1 | 22 | 24.8 | 0   | 0   | 0   | 995 | 25   | 80  | 1.3  |
| 2020 | 9 | 1 | 23 | 24.6 | 0   | 0   | 0   | 995 | 24.8 | 77  | 1.7  |
| 2020 | 9 | 2 | 0  | 24.3 | 0   | 0   | 0   | 994 | 24.5 | 74  | 2.1  |
| 2020 | 9 | 2 | 1  | 24.1 | 0   | 0   | 0   | 994 | 24.3 | 69  | 2.3  |
| 2020 | 9 | 2 | 2  | 23.9 | 0   | 0   | 0   | 993 | 24.2 | 65  | 2.4  |
| 2020 | 9 | 2 | 3  | 23.7 | 0   | 0   | 0   | 993 | 24.1 | 62  | 2.4  |
| 2020 | 9 | 2 | 4  | 23.7 | 0   | 0   | 0   | 993 | 24   | 61  | 2.5  |
| 2020 | 9 | 2 | 5  | 23.7 | 0   | 0   | 0   | 993 | 24   | 61  | 2.5  |
| 2020 | 9 | 2 | 6  | 23.7 | 0   | 0   | 0   | 993 | 24   | 59  | 2.6  |
| 2020 | 9 | 2 | 7  | 24   | 32  | 0   | 32  | 993 | 24.4 | 55  | 3    |
| 2020 | 9 | 2 | 8  | 24.5 | 56  | 0   | 56  | 992 | 25   | 53  | 3.2  |
| 2020 | 9 | 2 | 9  | 24.9 | 128 | 0   | 128 | 992 | 25.7 | 54  | 3.5  |
| 2020 | 9 | 2 | 10 | 24.5 | 231 | 13  | 240 | 991 | 25.9 | 55  | 4.1  |
| 2020 | 9 | 2 | 11 | 24.4 | 346 | 40  | 379 | 990 | 26   | 48  | 4.4  |
| 2020 | 9 | 2 | 12 | 24.6 | 407 | 64  | 463 | 988 | 26.3 | 44  | 4.7  |
| 2020 | 9 | 2 | 13 | 24.9 | 250 | 13  | 261 | 986 | 26.6 | 43  | 5.2  |
| 2020 | 9 | 2 | 14 | 25.1 | 121 | 0   | 121 | 985 | 26.7 | 42  | 5.6  |
| 2020 | 9 | 2 | 15 | 25.1 | 65  | 0   | 65  | 983 | 26.5 | 40  | 5.8  |
| 2020 | 9 | 2 | 16 | 24.9 | 38  | 0   | 38  | 983 | 26.1 | 39  | 6    |
| 2020 | 9 | 2 | 17 | 24.6 | 14  | 0   | 14  | 982 | 25.7 | 39  | 6.3  |
| 2020 | 9 | 2 | 18 | 24.4 | 9   | 0   | 9   | 981 | 25.3 | 40  | 6.6  |
| 2020 | 9 | 2 | 19 | 24.2 | 0   | 0   | 0   | 980 | 25   | 40  | 6.9  |
| 2020 | 9 | 2 | 20 | 24.2 | 0   | 0   | 0   | 979 | 25   | 36  | 6.9  |
| 2020 | 9 | 2 | 21 | 24.2 | 0   | 0   | 0   | 977 | 24.8 | 24  | 6.9  |
| 2020 | 9 | 2 | 22 | 24.2 | 0   | 0   | 0   | 975 | 24.6 | 6   | 7.2  |
| 2020 | 9 | 2 | 23 | 24   | 0   | 0   | 0   | 973 | 24.3 | 348 | 8.3  |
| 2020 | 9 | 3 | 0  | 23.7 | 0   | 0   | 0   | 972 | 24   | 335 | 9.5  |
| 2020 | 9 | 3 | 1  | 23.4 | 0   | 0   | 0   | 972 | 23.6 | 323 | 10.1 |
| 2020 | 9 | 3 | 2  | 23.1 | 0   | 0   | 0   | 972 | 23.2 | 310 | 9.9  |
| 2020 | 9 | 3 | 3  | 22.6 | 0   | 0   | 0   | 974 | 22.7 | 299 | 9.6  |
| 2020 | 9 | 3 | 4  | 21.6 | 0   | 0   | 0   | 976 | 21.9 | 296 | 9.4  |
| 2020 | 9 | 3 | 5  | 20.5 | 0   | 0   | 0   | 980 | 21   | 296 | 9.2  |
| 2020 | 9 | 3 | 6  | 19.5 | 0   | 0   | 0   | 983 | 20.4 | 294 | 8    |
| 2020 | 9 | 3 | 7  | 19.3 | 74  | 178 | 105 | 986 | 20.7 | 290 | 6.7  |
| 2020 | 9 | 3 | 8  | 19.7 | 128 | 463 | 304 | 988 | 21.8 | 284 | 5.9  |
| 2020 | 9 | 3 | 9  | 20   | 153 | 629 | 508 | 990 | 23   | 277 | 5.6  |
| 2020 | 9 | 3 | 10 | 20.6 | 162 | 731 | 684 | 991 | 24.4 | 269 | 5.5  |
| 2020 | 9 | 3 | 11 | 21.3 | 170 | 785 | 815 | 991 | 25.6 | 263 | 5.2  |
| 2020 | 9 | 3 | 12 | 21.9 | 183 | 792 | 879 | 991 | 26.3 | 257 | 5    |
| 2020 | 9 | 3 | 13 | 22.3 | 430 | 249 | 650 | 992 | 26.6 | 253 | 5.1  |
| 2020 | 9 | 3 | 14 | 22.3 | 399 | 109 | 489 | 992 | 26.5 | 250 | 5.3  |
| 2020 | 9 | 3 | 15 | 22   | 196 | 678 | 686 | 993 | 25.8 | 252 | 5.4  |
| 2020 | 9 | 3 | 16 | 21.5 | 167 | 618 | 521 | 994 | 24.9 | 256 | 5.1  |
| 2020 | 9 | 3 | 17 | 20.9 | 123 | 519 | 326 | 995 | 23.8 | 259 | 4.2  |

|      |   |   |    |      |     |     |     |      |      |     |     |
|------|---|---|----|------|-----|-----|-----|------|------|-----|-----|
| 2020 | 9 | 3 | 18 | 20.5 | 67  | 331 | 129 | 996  | 22.2 | 259 | 2.6 |
| 2020 | 9 | 3 | 19 | 19.8 | 0   | 0   | 0   | 996  | 20.5 | 252 | 1.6 |
| 2020 | 9 | 3 | 20 | 19.4 | 0   | 0   | 0   | 997  | 19.8 | 242 | 1.3 |
| 2020 | 9 | 3 | 21 | 19.2 | 0   | 0   | 0   | 998  | 19.3 | 232 | 1.3 |
| 2020 | 9 | 3 | 22 | 18.9 | 0   | 0   | 0   | 999  | 18.9 | 223 | 1.3 |
| 2020 | 9 | 3 | 23 | 18.6 | 0   | 0   | 0   | 999  | 18.6 | 215 | 1.3 |
| 2020 | 9 | 4 | 0  | 18.3 | 0   | 0   | 0   | 999  | 18.3 | 212 | 1.3 |
| 2020 | 9 | 4 | 1  | 18   | 0   | 0   | 0   | 999  | 18   | 213 | 1.4 |
| 2020 | 9 | 4 | 2  | 17.8 | 0   | 0   | 0   | 999  | 17.8 | 210 | 1.4 |
| 2020 | 9 | 4 | 3  | 17.7 | 0   | 0   | 0   | 999  | 17.7 | 208 | 1.4 |
| 2020 | 9 | 4 | 4  | 17.5 | 0   | 0   | 0   | 1000 | 17.5 | 208 | 1.4 |
| 2020 | 9 | 4 | 5  | 17.3 | 0   | 0   | 0   | 1000 | 17.3 | 204 | 1.3 |
| 2020 | 9 | 4 | 6  | 17.7 | 0   | 0   | 0   | 1000 | 17.7 | 197 | 1.2 |
| 2020 | 9 | 4 | 7  | 19.2 | 68  | 236 | 109 | 1001 | 20.5 | 190 | 2   |
| 2020 | 9 | 4 | 8  | 19.5 | 128 | 476 | 308 | 1001 | 22.4 | 199 | 2.1 |
| 2020 | 9 | 4 | 9  | 19.3 | 166 | 609 | 508 | 1001 | 24.3 | 219 | 2.4 |
| 2020 | 9 | 4 | 10 | 19.5 | 196 | 675 | 676 | 1001 | 25.6 | 226 | 2.4 |
| 2020 | 9 | 4 | 11 | 19.8 | 218 | 706 | 796 | 1001 | 26.5 | 225 | 2.3 |
| 2020 | 9 | 4 | 12 | 20   | 209 | 753 | 869 | 1001 | 27.1 | 225 | 2.4 |
| 2020 | 9 | 4 | 13 | 20.1 | 222 | 731 | 864 | 1000 | 27.3 | 225 | 2.4 |
| 2020 | 9 | 4 | 14 | 20.1 | 334 | 34  | 362 | 1000 | 27.3 | 225 | 2.4 |
| 2020 | 9 | 4 | 15 | 20   | 315 | 317 | 543 | 1000 | 27   | 224 | 2.2 |
| 2020 | 9 | 4 | 16 | 20.5 | 241 | 68  | 279 | 1000 | 26.5 | 221 | 1.7 |
| 2020 | 9 | 4 | 17 | 20   | 194 | 232 | 284 | 1000 | 25.8 | 219 | 1.5 |
| 2020 | 9 | 4 | 18 | 20.6 | 32  | 0   | 32  | 1000 | 23.7 | 209 | 0.9 |
| 2020 | 9 | 4 | 19 | 19.3 | 0   | 0   | 0   | 1001 | 22.1 | 192 | 0.9 |
| 2020 | 9 | 4 | 20 | 18.8 | 0   | 0   | 0   | 1001 | 21.2 | 179 | 1   |
| 2020 | 9 | 4 | 21 | 18.4 | 0   | 0   | 0   | 1002 | 20.5 | 170 | 1   |
| 2020 | 9 | 4 | 22 | 18.3 | 0   | 0   | 0   | 1002 | 20.4 | 161 | 0.9 |
| 2020 | 9 | 4 | 23 | 18   | 0   | 0   | 0   | 1001 | 20.4 | 153 | 0.9 |
| 2020 | 9 | 5 | 0  | 17.8 | 0   | 0   | 0   | 1001 | 20.2 | 146 | 0.8 |
| 2020 | 9 | 5 | 1  | 17.7 | 0   | 0   | 0   | 1001 | 19.9 | 134 | 0.8 |
| 2020 | 9 | 5 | 2  | 17.6 | 0   | 0   | 0   | 1001 | 19.8 | 124 | 0.8 |
| 2020 | 9 | 5 | 3  | 17.5 | 0   | 0   | 0   | 1001 | 19.5 | 105 | 0.8 |
| 2020 | 9 | 5 | 4  | 17.6 | 0   | 0   | 0   | 1001 | 19   | 104 | 0.8 |
| 2020 | 9 | 5 | 5  | 17.6 | 0   | 0   | 0   | 1001 | 18.6 | 108 | 0.9 |
| 2020 | 9 | 5 | 6  | 18   | 0   | 0   | 0   | 1002 | 18.8 | 105 | 1   |
| 2020 | 9 | 5 | 7  | 19.3 | 41  | 0   | 41  | 1002 | 20.3 | 107 | 1.3 |
| 2020 | 9 | 5 | 8  | 19.8 | 132 | 14  | 137 | 1002 | 21.4 | 114 | 2.2 |
| 2020 | 9 | 5 | 9  | 20.6 | 245 | 111 | 307 | 1002 | 22.3 | 123 | 2.6 |
| 2020 | 9 | 5 | 10 | 21   | 308 | 59  | 349 | 1002 | 23.2 | 133 | 2.5 |
| 2020 | 9 | 5 | 11 | 21   | 55  | 0   | 55  | 1002 | 23.5 | 135 | 2.3 |
| 2020 | 9 | 5 | 12 | 20.9 | 338 | 27  | 362 | 1001 | 23.5 | 127 | 2.5 |
| 2020 | 9 | 5 | 13 | 20.6 | 78  | 0   | 78  | 1001 | 23.4 | 125 | 2.8 |
| 2020 | 9 | 5 | 14 | 20.2 | 207 | 8   | 214 | 1001 | 23.2 | 119 | 2.8 |
| 2020 | 9 | 5 | 15 | 20   | 152 | 0   | 152 | 1000 | 22.9 | 114 | 2.6 |
| 2020 | 9 | 5 | 16 | 20   | 121 | 0   | 121 | 1000 | 22.4 | 103 | 1.9 |
| 2020 | 9 | 5 | 17 | 20   | 130 | 8   | 134 | 999  | 21.8 | 76  | 1.7 |
| 2020 | 9 | 5 | 18 | 19.8 | 7   | 0   | 7   | 1000 | 20.6 | 86  | 0.8 |
| 2020 | 9 | 5 | 19 | 18.7 | 0   | 0   | 0   | 1001 | 19.4 | 124 | 0.8 |

|      |   |   |    |      |     |     |     |      |      |     |      |
|------|---|---|----|------|-----|-----|-----|------|------|-----|------|
| 2020 | 9 | 5 | 20 | 18.4 | 0   | 0   | 0   | 1001 | 18.9 | 106 | 1.2  |
| 2020 | 9 | 5 | 21 | 18   | 0   | 0   | 0   | 1000 | 18.4 | 90  | 1.3  |
| 2020 | 9 | 5 | 22 | 17.6 | 0   | 0   | 0   | 1000 | 17.9 | 79  | 1.1  |
| 2020 | 9 | 5 | 23 | 17.2 | 0   | 0   | 0   | 1000 | 17.4 | 74  | 1    |
| 2020 | 9 | 6 | 0  | 16.8 | 0   | 0   | 0   | 999  | 17.1 | 69  | 0.9  |
| 2020 | 9 | 6 | 1  | 16.5 | 0   | 0   | 0   | 999  | 16.8 | 66  | 0.9  |
| 2020 | 9 | 6 | 2  | 16.3 | 0   | 0   | 0   | 999  | 16.6 | 67  | 0.9  |
| 2020 | 9 | 6 | 3  | 16.1 | 0   | 0   | 0   | 999  | 16.5 | 60  | 0.9  |
| 2020 | 9 | 6 | 4  | 15.9 | 0   | 0   | 0   | 998  | 16.4 | 47  | 1    |
| 2020 | 9 | 6 | 5  | 15.8 | 0   | 0   | 0   | 998  | 16.4 | 39  | 1.3  |
| 2020 | 9 | 6 | 6  | 15.9 | 0   | 0   | 0   | 998  | 16.6 | 38  | 1.9  |
| 2020 | 9 | 6 | 7  | 16.4 | 10  | 0   | 10  | 998  | 17.1 | 42  | 2.5  |
| 2020 | 9 | 6 | 8  | 17.5 | 55  | 0   | 55  | 998  | 18.2 | 42  | 2.7  |
| 2020 | 9 | 6 | 9  | 18.9 | 165 | 3   | 167 | 997  | 20.2 | 39  | 2.8  |
| 2020 | 9 | 6 | 10 | 19.6 | 213 | 9   | 219 | 996  | 21.3 | 38  | 3.1  |
| 2020 | 9 | 6 | 11 | 20.4 | 353 | 48  | 392 | 995  | 22.1 | 37  | 3.3  |
| 2020 | 9 | 6 | 12 | 21.2 | 381 | 47  | 422 | 994  | 23.4 | 40  | 3.4  |
| 2020 | 9 | 6 | 13 | 21.4 | 248 | 13  | 259 | 993  | 24   | 42  | 3.4  |
| 2020 | 9 | 6 | 14 | 21.5 | 150 | 2   | 151 | 993  | 23.9 | 37  | 3.2  |
| 2020 | 9 | 6 | 15 | 21.6 | 120 | 0   | 120 | 992  | 23.4 | 30  | 3.1  |
| 2020 | 9 | 6 | 16 | 21.4 | 28  | 0   | 28  | 991  | 22.7 | 28  | 3.3  |
| 2020 | 9 | 6 | 17 | 20.7 | 20  | 0   | 20  | 991  | 21.8 | 30  | 3.9  |
| 2020 | 9 | 6 | 18 | 19.8 | 6   | 0   | 6   | 990  | 20.8 | 32  | 4.3  |
| 2020 | 9 | 6 | 19 | 19   | 0   | 0   | 0   | 990  | 20   | 31  | 4.7  |
| 2020 | 9 | 6 | 20 | 18.5 | 0   | 0   | 0   | 989  | 19.5 | 27  | 5    |
| 2020 | 9 | 6 | 21 | 18.1 | 0   | 0   | 0   | 988  | 19   | 22  | 5.2  |
| 2020 | 9 | 6 | 22 | 17.8 | 0   | 0   | 0   | 987  | 18.6 | 17  | 5.7  |
| 2020 | 9 | 6 | 23 | 17.4 | 0   | 0   | 0   | 985  | 18.2 | 11  | 6.3  |
| 2020 | 9 | 7 | 0  | 17.1 | 0   | 0   | 0   | 983  | 17.9 | 7   | 7    |
| 2020 | 9 | 7 | 1  | 16.9 | 0   | 0   | 0   | 981  | 17.8 | 7   | 7.6  |
| 2020 | 9 | 7 | 2  | 16.8 | 0   | 0   | 0   | 979  | 17.7 | 7   | 8.1  |
| 2020 | 9 | 7 | 3  | 16.7 | 0   | 0   | 0   | 977  | 17.6 | 4   | 8.5  |
| 2020 | 9 | 7 | 4  | 16.6 | 0   | 0   | 0   | 976  | 17.5 | 358 | 9    |
| 2020 | 9 | 7 | 5  | 16.5 | 0   | 0   | 0   | 975  | 17.4 | 351 | 9.5  |
| 2020 | 9 | 7 | 6  | 16.5 | 0   | 0   | 0   | 975  | 17.3 | 345 | 9.9  |
| 2020 | 9 | 7 | 7  | 16.6 | 27  | 0   | 27  | 975  | 17.4 | 340 | 10.1 |
| 2020 | 9 | 7 | 8  | 17   | 75  | 0   | 75  | 975  | 17.9 | 333 | 10.2 |
| 2020 | 9 | 7 | 9  | 17.7 | 93  | 0   | 93  | 975  | 18.8 | 325 | 10.2 |
| 2020 | 9 | 7 | 10 | 18.5 | 58  | 0   | 58  | 976  | 19.9 | 315 | 10   |
| 2020 | 9 | 7 | 11 | 18.9 | 361 | 56  | 406 | 977  | 20.6 | 306 | 9.6  |
| 2020 | 9 | 7 | 12 | 19.3 | 91  | 0   | 91  | 978  | 20.9 | 299 | 9    |
| 2020 | 9 | 7 | 13 | 19.7 | 110 | 0   | 110 | 980  | 21.1 | 292 | 8.3  |
| 2020 | 9 | 7 | 14 | 19.9 | 69  | 0   | 69  | 982  | 21.4 | 284 | 7.7  |
| 2020 | 9 | 7 | 15 | 20.1 | 140 | 0   | 140 | 984  | 21.6 | 275 | 7.3  |
| 2020 | 9 | 7 | 16 | 20.2 | 45  | 0   | 45  | 986  | 21.5 | 270 | 6.9  |
| 2020 | 9 | 7 | 17 | 20.1 | 43  | 0   | 43  | 988  | 21.3 | 265 | 6.2  |
| 2020 | 9 | 7 | 18 | 19.9 | 64  | 237 | 104 | 989  | 20.8 | 262 | 5.4  |
| 2020 | 9 | 7 | 19 | 19.8 | 0   | 0   | 0   | 991  | 20.6 | 258 | 4.6  |
| 2020 | 9 | 7 | 20 | 19.8 | 0   | 0   | 0   | 992  | 20.3 | 248 | 3.9  |
| 2020 | 9 | 7 | 21 | 19.6 | 0   | 0   | 0   | 993  | 19.9 | 237 | 3.5  |



|      |   |   |    |      |     |     |     |      |      |     |     |
|------|---|---|----|------|-----|-----|-----|------|------|-----|-----|
| 2020 | 9 | 7 | 22 | 19.4 | 0   | 0   | 0   | 994  | 19.4 | 225 | 3.1 |
| 2020 | 9 | 7 | 23 | 19.3 | 0   | 0   | 0   | 994  | 19.3 | 218 | 3.1 |
| 2020 | 9 | 8 | 0  | 19.2 | 0   | 0   | 0   | 995  | 19.2 | 215 | 3   |
| 2020 | 9 | 8 | 1  | 19.1 | 0   | 0   | 0   | 995  | 19.1 | 214 | 3   |
| 2020 | 9 | 8 | 2  | 19.1 | 0   | 0   | 0   | 996  | 19.1 | 214 | 2.8 |
| 2020 | 9 | 8 | 3  | 19.1 | 0   | 0   | 0   | 996  | 19.1 | 214 | 2.7 |
| 2020 | 9 | 8 | 4  | 19.1 | 0   | 0   | 0   | 997  | 19.1 | 215 | 2.6 |
| 2020 | 9 | 8 | 5  | 19.2 | 0   | 0   | 0   | 997  | 19.2 | 214 | 2.5 |
| 2020 | 9 | 8 | 6  | 19.5 | 0   | 0   | 0   | 998  | 19.5 | 212 | 2.4 |
| 2020 | 9 | 8 | 7  | 20.8 | 69  | 125 | 90  | 999  | 21.1 | 210 | 3   |
| 2020 | 9 | 8 | 8  | 21.8 | 159 | 318 | 276 | 999  | 22.6 | 215 | 3.2 |
| 2020 | 9 | 8 | 9  | 22.4 | 143 | 0   | 143 | 1000 | 24   | 228 | 3.7 |
| 2020 | 9 | 8 | 10 | 22.3 | 263 | 522 | 629 | 1000 | 25   | 234 | 3.7 |
| 2020 | 9 | 8 | 11 | 22.2 | 391 | 120 | 487 | 1000 | 25.7 | 238 | 3.8 |
| 2020 | 9 | 8 | 12 | 22.1 | 354 | 512 | 796 | 1000 | 26.1 | 241 | 3.7 |
| 2020 | 9 | 8 | 13 | 22.1 | 354 | 513 | 797 | 1000 | 26.4 | 243 | 3.5 |
| 2020 | 9 | 8 | 14 | 22.2 | 334 | 499 | 737 | 999  | 26.5 | 244 | 3.2 |
| 2020 | 9 | 8 | 15 | 22.2 | 311 | 434 | 616 | 999  | 26.4 | 242 | 2.8 |
| 2020 | 9 | 8 | 16 | 22.6 | 152 | 0   | 152 | 999  | 26.2 | 238 | 2.1 |
| 2020 | 9 | 8 | 17 | 22.9 | 183 | 214 | 262 | 999  | 25.5 | 232 | 1.5 |
| 2020 | 9 | 8 | 18 | 22.5 | 63  | 65  | 73  | 1000 | 23.6 | 220 | 0.9 |
| 2020 | 9 | 8 | 19 | 21.4 | 0   | 0   | 0   | 1000 | 22.2 | 204 | 1   |
| 2020 | 9 | 8 | 20 | 21.1 | 0   | 0   | 0   | 1001 | 21.7 | 194 | 1.1 |
| 2020 | 9 | 8 | 21 | 20.9 | 0   | 0   | 0   | 1001 | 21.2 | 188 | 1.2 |
| 2020 | 9 | 8 | 22 | 20.7 | 0   | 0   | 0   | 1001 | 20.8 | 183 | 1.2 |
| 2020 | 9 | 8 | 23 | 20.6 | 0   | 0   | 0   | 1001 | 20.6 | 178 | 1.3 |
| 2020 | 9 | 9 | 0  | 20.4 | 0   | 0   | 0   | 1000 | 20.4 | 177 | 1.4 |
| 2020 | 9 | 9 | 1  | 20.2 | 0   | 0   | 0   | 1000 | 20.2 | 180 | 1.4 |
| 2020 | 9 | 9 | 2  | 20   | 0   | 0   | 0   | 1000 | 20   | 185 | 1.3 |
| 2020 | 9 | 9 | 3  | 19.9 | 0   | 0   | 0   | 1000 | 19.9 | 192 | 1.1 |
| 2020 | 9 | 9 | 4  | 19.8 | 0   | 0   | 0   | 1000 | 19.8 | 200 | 1   |
| 2020 | 9 | 9 | 5  | 19.7 | 0   | 0   | 0   | 1000 | 19.7 | 204 | 1   |
| 2020 | 9 | 9 | 6  | 19.8 | 0   | 0   | 0   | 1000 | 19.8 | 208 | 0.9 |
| 2020 | 9 | 9 | 7  | 20.8 | 39  | 0   | 39  | 1000 | 21.2 | 204 | 1.2 |
| 2020 | 9 | 9 | 8  | 21.1 | 181 | 210 | 258 | 1000 | 22.3 | 201 | 1.7 |
| 2020 | 9 | 9 | 9  | 20.8 | 221 | 46  | 247 | 1000 | 23.6 | 216 | 1.9 |
| 2020 | 9 | 9 | 10 | 20.4 | 119 | 0   | 119 | 1000 | 24.6 | 227 | 2.2 |
| 2020 | 9 | 9 | 11 | 20.5 | 69  | 0   | 69  | 999  | 25.2 | 229 | 2.7 |
| 2020 | 9 | 9 | 12 | 20.6 | 322 | 24  | 343 | 998  | 25.6 | 230 | 3.1 |
| 2020 | 9 | 9 | 13 | 20.6 | 340 | 29  | 365 | 998  | 25.8 | 230 | 3.3 |
| 2020 | 9 | 9 | 14 | 20.5 | 262 | 614 | 756 | 997  | 25.7 | 230 | 3.5 |
| 2020 | 9 | 9 | 15 | 20.4 | 250 | 546 | 632 | 997  | 25.3 | 229 | 3.4 |
| 2020 | 9 | 9 | 16 | 20.4 | 219 | 447 | 464 | 996  | 24.7 | 228 | 3   |
| 2020 | 9 | 9 | 17 | 20.8 | 89  | 0   | 89  | 996  | 23.8 | 227 | 2.2 |
| 2020 | 9 | 9 | 18 | 20.8 | 28  | 0   | 28  | 997  | 22   | 222 | 1.2 |
| 2020 | 9 | 9 | 19 | 20   | 0   | 0   | 0   | 997  | 20.6 | 210 | 1   |
| 2020 | 9 | 9 | 20 | 19.8 | 0   | 0   | 0   | 997  | 20.1 | 201 | 1.1 |
| 2020 | 9 | 9 | 21 | 19.7 | 0   | 0   | 0   | 997  | 19.7 | 197 | 1.1 |
| 2020 | 9 | 9 | 22 | 19.4 | 0   | 0   | 0   | 997  | 19.4 | 196 | 1.2 |
| 2020 | 9 | 9 | 23 | 19.2 | 0   | 0   | 0   | 997  | 19.2 | 197 | 1.2 |

|      |   |    |    |      |     |     |     |      |      |     |     |
|------|---|----|----|------|-----|-----|-----|------|------|-----|-----|
| 2020 | 9 | 10 | 0  | 19.1 | 0   | 0   | 0   | 997  | 19.1 | 199 | 1.2 |
| 2020 | 9 | 10 | 1  | 18.9 | 0   | 0   | 0   | 996  | 18.9 | 206 | 1.1 |
| 2020 | 9 | 10 | 2  | 18.7 | 0   | 0   | 0   | 996  | 18.7 | 213 | 1   |
| 2020 | 9 | 10 | 3  | 18.6 | 0   | 0   | 0   | 996  | 18.6 | 221 | 1   |
| 2020 | 9 | 10 | 4  | 18.7 | 0   | 0   | 0   | 996  | 18.7 | 227 | 1   |
| 2020 | 9 | 10 | 5  | 18.9 | 0   | 0   | 0   | 996  | 19   | 233 | 0.9 |
| 2020 | 9 | 10 | 6  | 19.1 | 0   | 0   | 0   | 996  | 19.3 | 229 | 0.7 |
| 2020 | 9 | 10 | 7  | 20.5 | 62  | 226 | 98  | 996  | 20.9 | 197 | 0.5 |
| 2020 | 9 | 10 | 8  | 20.2 | 129 | 17  | 135 | 997  | 22.2 | 148 | 0.2 |
| 2020 | 9 | 10 | 9  | 18.5 | 143 | 644 | 495 | 997  | 23.6 | 345 | 0.1 |
| 2020 | 9 | 10 | 10 | 17.8 | 299 | 335 | 533 | 997  | 25.5 | 281 | 0.3 |
| 2020 | 9 | 10 | 11 | 17.3 | 392 | 173 | 531 | 997  | 26.4 | 262 | 0.5 |
| 2020 | 9 | 10 | 12 | 17.4 | 415 | 99  | 500 | 997  | 26.7 | 245 | 0.8 |
| 2020 | 9 | 10 | 13 | 17.7 | 177 | 789 | 853 | 996  | 27   | 238 | 1   |
| 2020 | 9 | 10 | 14 | 17.9 | 388 | 210 | 556 | 996  | 26.6 | 245 | 1.2 |
| 2020 | 9 | 10 | 15 | 18.2 | 256 | 459 | 575 | 996  | 26.5 | 262 | 1.3 |
| 2020 | 9 | 10 | 16 | 17.9 | 205 | 483 | 468 | 996  | 25.9 | 278 | 1.1 |
| 2020 | 9 | 10 | 17 | 18.1 | 174 | 247 | 263 | 997  | 24.8 | 294 | 1   |
| 2020 | 9 | 10 | 18 | 19.4 | 35  | 0   | 35  | 997  | 23.4 | 312 | 0.7 |
| 2020 | 9 | 10 | 19 | 17.9 | 0   | 0   | 0   | 997  | 22.7 | 326 | 0.8 |
| 2020 | 9 | 10 | 20 | 17.5 | 0   | 0   | 0   | 998  | 22.3 | 347 | 0.7 |
| 2020 | 9 | 10 | 21 | 17.6 | 0   | 0   | 0   | 998  | 21.5 | 15  | 0.8 |
| 2020 | 9 | 10 | 22 | 17.8 | 0   | 0   | 0   | 998  | 20.7 | 35  | 0.8 |
| 2020 | 9 | 10 | 23 | 17.6 | 0   | 0   | 0   | 999  | 20   | 53  | 0.9 |
| 2020 | 9 | 11 | 0  | 17.1 | 0   | 0   | 0   | 999  | 19.8 | 70  | 0.9 |
| 2020 | 9 | 11 | 1  | 16.9 | 0   | 0   | 0   | 999  | 19.5 | 93  | 0.8 |
| 2020 | 9 | 11 | 2  | 17.3 | 0   | 0   | 0   | 999  | 19.2 | 109 | 0.9 |
| 2020 | 9 | 11 | 3  | 17.5 | 0   | 0   | 0   | 999  | 18.9 | 120 | 0.9 |
| 2020 | 9 | 11 | 4  | 17.7 | 0   | 0   | 0   | 999  | 18.6 | 130 | 0.9 |
| 2020 | 9 | 11 | 5  | 18   | 0   | 0   | 0   | 1000 | 18.6 | 138 | 1.1 |
| 2020 | 9 | 11 | 6  | 18.5 | 0   | 0   | 0   | 1000 | 18.9 | 148 | 1   |
| 2020 | 9 | 11 | 7  | 19.9 | 42  | 0   | 42  | 1000 | 20.5 | 172 | 0.9 |
| 2020 | 9 | 11 | 8  | 19.8 | 14  | 0   | 14  | 1001 | 21.8 | 189 | 1.1 |
| 2020 | 9 | 11 | 9  | 19.3 | 159 | 1   | 159 | 1001 | 22.9 | 188 | 0.9 |
| 2020 | 9 | 11 | 10 | 18.8 | 95  | 0   | 95  | 1001 | 23.6 | 152 | 0.6 |
| 2020 | 9 | 11 | 11 | 19   | 52  | 0   | 52  | 1000 | 24.1 | 95  | 1.3 |
| 2020 | 9 | 11 | 12 | 20.2 | 264 | 14  | 276 | 1000 | 25   | 91  | 2.3 |
| 2020 | 9 | 11 | 13 | 20.8 | 154 | 3   | 156 | 1000 | 25.1 | 102 | 2.7 |
| 2020 | 9 | 11 | 14 | 21.1 | 121 | 0   | 121 | 1000 | 24.7 | 119 | 2.6 |
| 2020 | 9 | 11 | 15 | 21.4 | 59  | 0   | 59  | 1000 | 23.7 | 124 | 2.2 |
| 2020 | 9 | 11 | 16 | 21.2 | 118 | 0   | 118 | 1001 | 23   | 127 | 2   |
| 2020 | 9 | 11 | 17 | 21.3 | 127 | 18  | 133 | 1001 | 22.4 | 127 | 1.3 |
| 2020 | 9 | 11 | 18 | 20.9 | 17  | 0   | 17  | 1001 | 21.6 | 123 | 0.9 |
| 2020 | 9 | 11 | 19 | 20.2 | 0   | 0   | 0   | 1001 | 20.8 | 108 | 0.9 |
| 2020 | 9 | 11 | 20 | 19.6 | 0   | 0   | 0   | 1001 | 20.1 | 100 | 1   |
| 2020 | 9 | 11 | 21 | 19.7 | 0   | 0   | 0   | 1002 | 20.1 | 100 | 1.2 |
| 2020 | 9 | 11 | 22 | 19.5 | 0   | 0   | 0   | 1001 | 19.8 | 95  | 1.3 |
| 2020 | 9 | 11 | 23 | 19.2 | 0   | 0   | 0   | 1001 | 19.4 | 96  | 1.6 |
| 2020 | 9 | 12 | 0  | 18.9 | 0   | 0   | 0   | 1001 | 19.1 | 94  | 1.8 |
| 2020 | 9 | 12 | 1  | 18.5 | 0   | 0   | 0   | 1001 | 18.8 | 91  | 2.1 |

|      |   |    |    |      |     |     |     |      |      |     |     |
|------|---|----|----|------|-----|-----|-----|------|------|-----|-----|
| 2020 | 9 | 12 | 2  | 18.1 | 0   | 0   | 0   | 1001 | 18.4 | 89  | 2.2 |
| 2020 | 9 | 12 | 3  | 17.7 | 0   | 0   | 0   | 1000 | 18   | 88  | 2.1 |
| 2020 | 9 | 12 | 4  | 17.2 | 0   | 0   | 0   | 1000 | 17.4 | 87  | 2   |
| 2020 | 9 | 12 | 5  | 16.9 | 0   | 0   | 0   | 1000 | 17.1 | 84  | 2.1 |
| 2020 | 9 | 12 | 6  | 16.8 | 0   | 0   | 0   | 1001 | 17   | 79  | 2   |
| 2020 | 9 | 12 | 7  | 17.4 | 28  | 0   | 28  | 1001 | 18.2 | 75  | 2.7 |
| 2020 | 9 | 12 | 8  | 18   | 143 | 120 | 186 | 1001 | 19.4 | 72  | 3.1 |
| 2020 | 9 | 12 | 9  | 18.7 | 163 | 579 | 477 | 1001 | 21   | 71  | 3.3 |
| 2020 | 9 | 12 | 10 | 19.2 | 187 | 661 | 644 | 1001 | 22.7 | 67  | 3   |
| 2020 | 9 | 12 | 11 | 19.8 | 387 | 197 | 543 | 1000 | 24.1 | 56  | 2.5 |
| 2020 | 9 | 12 | 12 | 20.2 | 407 | 90  | 483 | 1000 | 25   | 47  | 2.1 |
| 2020 | 9 | 12 | 13 | 20.5 | 333 | 28  | 357 | 1000 | 25.5 | 41  | 1.8 |
| 2020 | 9 | 12 | 14 | 20.5 | 233 | 11  | 241 | 1000 | 25.8 | 34  | 1.6 |
| 2020 | 9 | 12 | 15 | 20.3 | 122 | 784 | 659 | 999  | 25.5 | 29  | 1.5 |
| 2020 | 9 | 12 | 16 | 20.6 | 222 | 271 | 367 | 1000 | 24.9 | 27  | 1.3 |
| 2020 | 9 | 12 | 17 | 20.9 | 135 | 56  | 155 | 1000 | 24.2 | 35  | 1   |
| 2020 | 9 | 12 | 18 | 21.1 | 11  | 0   | 11  | 1001 | 22.8 | 52  | 0.6 |
| 2020 | 9 | 12 | 19 | 20.8 | 0   | 0   | 0   | 1001 | 21.7 | 71  | 0.5 |
| 2020 | 9 | 12 | 20 | 20.6 | 0   | 0   | 0   | 1002 | 21.1 | 90  | 0.7 |
| 2020 | 9 | 12 | 21 | 20.3 | 0   | 0   | 0   | 1002 | 20.8 | 104 | 1.1 |
| 2020 | 9 | 12 | 22 | 20   | 0   | 0   | 0   | 1002 | 20.6 | 112 | 1.9 |
| 2020 | 9 | 12 | 23 | 19.8 | 0   | 0   | 0   | 1002 | 20.3 | 115 | 2.4 |
| 2020 | 9 | 13 | 0  | 19.4 | 0   | 0   | 0   | 1002 | 19.8 | 112 | 2.5 |
| 2020 | 9 | 13 | 1  | 18.7 | 0   | 0   | 0   | 1002 | 19.2 | 108 | 2.5 |
| 2020 | 9 | 13 | 2  | 18   | 0   | 0   | 0   | 1002 | 18.6 | 105 | 2.5 |
| 2020 | 9 | 13 | 3  | 17.5 | 0   | 0   | 0   | 1002 | 18.1 | 101 | 2.1 |
| 2020 | 9 | 13 | 4  | 17.2 | 0   | 0   | 0   | 1002 | 17.8 | 96  | 1.9 |
| 2020 | 9 | 13 | 5  | 17   | 0   | 0   | 0   | 1003 | 17.5 | 92  | 1.8 |
| 2020 | 9 | 13 | 6  | 17   | 0   | 0   | 0   | 1003 | 17.4 | 90  | 1.7 |
| 2020 | 9 | 13 | 7  | 17.3 | 7   | 0   | 7   | 1004 | 18.1 | 90  | 2.1 |
| 2020 | 9 | 13 | 8  | 17.5 | 22  | 0   | 22  | 1004 | 18.9 | 91  | 2.5 |
| 2020 | 9 | 13 | 9  | 17.7 | 41  | 0   | 41  | 1004 | 19.9 | 93  | 2.5 |
| 2020 | 9 | 13 | 10 | 18.1 | 265 | 28  | 285 | 1004 | 21.3 | 101 | 2.2 |
| 2020 | 9 | 13 | 11 | 18.4 | 289 | 21  | 306 | 1003 | 22.7 | 116 | 1.6 |
| 2020 | 9 | 13 | 12 | 18.8 | 184 | 6   | 189 | 1003 | 23.4 | 136 | 1.3 |
| 2020 | 9 | 13 | 13 | 19.1 | 172 | 5   | 176 | 1002 | 23.8 | 150 | 1.1 |
| 2020 | 9 | 13 | 14 | 19.3 | 381 | 129 | 483 | 1002 | 23.9 | 164 | 0.9 |
| 2020 | 9 | 13 | 15 | 19.4 | 315 | 117 | 395 | 1002 | 24   | 183 | 0.7 |
| 2020 | 9 | 13 | 16 | 19.3 | 229 | 201 | 335 | 1002 | 23.8 | 193 | 0.6 |
| 2020 | 9 | 13 | 17 | 19.7 | 114 | 1   | 115 | 1002 | 23.3 | 198 | 0.4 |
| 2020 | 9 | 13 | 18 | 20.1 | 11  | 0   | 11  | 1002 | 22.1 | 228 | 0.3 |
| 2020 | 9 | 13 | 19 | 19.6 | 0   | 0   | 0   | 1002 | 21   | 251 | 0.4 |
| 2020 | 9 | 13 | 20 | 19.3 | 0   | 0   | 0   | 1003 | 20.4 | 272 | 0.4 |
| 2020 | 9 | 13 | 21 | 19   | 0   | 0   | 0   | 1003 | 19.9 | 293 | 0.4 |
| 2020 | 9 | 13 | 22 | 18.7 | 0   | 0   | 0   | 1003 | 19.5 | 308 | 0.5 |
| 2020 | 9 | 13 | 23 | 18.5 | 0   | 0   | 0   | 1003 | 19.2 | 317 | 0.5 |
| 2020 | 9 | 14 | 0  | 18.3 | 0   | 0   | 0   | 1003 | 19   | 328 | 0.5 |
| 2020 | 9 | 14 | 1  | 18.1 | 0   | 0   | 0   | 1003 | 18.7 | 343 | 0.5 |
| 2020 | 9 | 14 | 2  | 17.9 | 0   | 0   | 0   | 1002 | 18.4 | 356 | 0.6 |
| 2020 | 9 | 14 | 3  | 17.5 | 0   | 0   | 0   | 1002 | 18   | 7   | 0.6 |

|      |   |    |    |      |     |     |     |      |      |     |     |
|------|---|----|----|------|-----|-----|-----|------|------|-----|-----|
| 2020 | 9 | 14 | 4  | 17.2 | 0   | 0   | 0   | 1002 | 17.6 | 17  | 0.7 |
| 2020 | 9 | 14 | 5  | 16.9 | 0   | 0   | 0   | 1002 | 17.4 | 28  | 0.7 |
| 2020 | 9 | 14 | 6  | 16.8 | 0   | 0   | 0   | 1003 | 17.4 | 35  | 0.7 |
| 2020 | 9 | 14 | 7  | 17.7 | 47  | 311 | 93  | 1003 | 18.9 | 37  | 0.9 |
| 2020 | 9 | 14 | 8  | 18   | 88  | 581 | 293 | 1003 | 20.8 | 25  | 0.8 |
| 2020 | 9 | 14 | 9  | 18.2 | 111 | 718 | 496 | 1003 | 22.7 | 11  | 0.9 |
| 2020 | 9 | 14 | 10 | 18.5 | 125 | 792 | 668 | 1003 | 23.9 | 9   | 1   |
| 2020 | 9 | 14 | 11 | 18.8 | 137 | 827 | 791 | 1002 | 24.9 | 351 | 1   |
| 2020 | 9 | 14 | 12 | 19   | 147 | 837 | 854 | 1002 | 25.5 | 325 | 1.2 |
| 2020 | 9 | 14 | 13 | 19   | 148 | 832 | 849 | 1001 | 25.7 | 312 | 1.5 |
| 2020 | 9 | 14 | 14 | 19.1 | 349 | 344 | 619 | 1001 | 25.8 | 310 | 1.8 |
| 2020 | 9 | 14 | 15 | 19   | 156 | 721 | 644 | 1000 | 25.3 | 312 | 2   |
| 2020 | 9 | 14 | 16 | 19.4 | 216 | 57  | 246 | 1000 | 24.1 | 314 | 1.7 |
| 2020 | 9 | 14 | 17 | 19.2 | 107 | 476 | 269 | 1001 | 22.9 | 327 | 1.7 |
| 2020 | 9 | 14 | 18 | 19.3 | 50  | 198 | 77  | 1001 | 21   | 342 | 1.3 |
| 2020 | 9 | 14 | 19 | 18.6 | 0   | 0   | 0   | 1001 | 19.9 | 351 | 1.3 |
| 2020 | 9 | 14 | 20 | 18.2 | 0   | 0   | 0   | 1002 | 19.2 | 1   | 1.4 |
| 2020 | 9 | 14 | 21 | 17.8 | 0   | 0   | 0   | 1002 | 18.7 | 12  | 1.3 |
| 2020 | 9 | 14 | 22 | 17.6 | 0   | 0   | 0   | 1002 | 18.3 | 19  | 1.2 |
| 2020 | 9 | 14 | 23 | 17.5 | 0   | 0   | 0   | 1002 | 18.1 | 25  | 1   |
| 2020 | 9 | 15 | 0  | 17.4 | 0   | 0   | 0   | 1001 | 17.9 | 29  | 1   |
| 2020 | 9 | 15 | 1  | 17.1 | 0   | 0   | 0   | 1001 | 17.4 | 32  | 0.9 |
| 2020 | 9 | 15 | 2  | 17   | 0   | 0   | 0   | 1001 | 17.3 | 43  | 1   |
| 2020 | 9 | 15 | 3  | 16.7 | 0   | 0   | 0   | 1001 | 16.8 | 46  | 0.9 |
| 2020 | 9 | 15 | 4  | 16.3 | 0   | 0   | 0   | 1001 | 16.5 | 40  | 0.9 |
| 2020 | 9 | 15 | 5  | 16.2 | 0   | 0   | 0   | 1002 | 16.3 | 36  | 0.9 |
| 2020 | 9 | 15 | 6  | 16   | 0   | 0   | 0   | 1002 | 16.1 | 44  | 0.9 |
| 2020 | 9 | 15 | 7  | 17.1 | 53  | 245 | 89  | 1002 | 18.4 | 56  | 1.6 |
| 2020 | 9 | 15 | 8  | 17.8 | 106 | 500 | 281 | 1002 | 19.5 | 69  | 1.8 |
| 2020 | 9 | 15 | 9  | 18.3 | 136 | 645 | 480 | 1001 | 21.1 | 89  | 1.7 |
| 2020 | 9 | 15 | 10 | 18.4 | 208 | 575 | 601 | 1001 | 23.7 | 112 | 1.7 |
| 2020 | 9 | 15 | 11 | 18.5 | 165 | 768 | 770 | 1001 | 25.1 | 132 | 1.7 |
| 2020 | 9 | 15 | 12 | 18.9 | 178 | 773 | 828 | 1000 | 24.8 | 137 | 1.7 |
| 2020 | 9 | 15 | 13 | 19.3 | 414 | 193 | 576 | 1000 | 24.8 | 147 | 1.9 |
| 2020 | 9 | 15 | 14 | 19.8 | 87  | 0   | 87  | 1000 | 25.5 | 157 | 2   |
| 2020 | 9 | 15 | 15 | 20.1 | 295 | 67  | 341 | 999  | 25.1 | 158 | 1.8 |
| 2020 | 9 | 15 | 16 | 20.4 | 218 | 251 | 349 | 999  | 24.4 | 159 | 1.7 |
| 2020 | 9 | 15 | 17 | 20.4 | 121 | 22  | 129 | 999  | 23.6 | 159 | 1.4 |
| 2020 | 9 | 15 | 18 | 20.6 | 35  | 0   | 35  | 999  | 22   | 164 | 0.9 |
| 2020 | 9 | 15 | 19 | 19.9 | 0   | 0   | 0   | 1000 | 20.7 | 162 | 0.9 |
| 2020 | 9 | 15 | 20 | 19.6 | 0   | 0   | 0   | 1000 | 20.1 | 159 | 1.1 |
| 2020 | 9 | 15 | 21 | 19.4 | 0   | 0   | 0   | 1000 | 19.7 | 152 | 1.1 |
| 2020 | 9 | 15 | 22 | 19.3 | 0   | 0   | 0   | 999  | 19.3 | 143 | 1.1 |
| 2020 | 9 | 15 | 23 | 19   | 0   | 0   | 0   | 999  | 19   | 138 | 1.1 |
| 2020 | 9 | 16 | 0  | 18.7 | 0   | 0   | 0   | 999  | 18.7 | 135 | 1.1 |
| 2020 | 9 | 16 | 1  | 18.6 | 0   | 0   | 0   | 999  | 18.6 | 131 | 1.1 |
| 2020 | 9 | 16 | 2  | 18.8 | 0   | 0   | 0   | 999  | 18.8 | 130 | 1.1 |
| 2020 | 9 | 16 | 3  | 18.8 | 0   | 0   | 0   | 998  | 18.8 | 128 | 1.1 |
| 2020 | 9 | 16 | 4  | 18.8 | 0   | 0   | 0   | 998  | 18.8 | 124 | 1.1 |
| 2020 | 9 | 16 | 5  | 18.9 | 0   | 0   | 0   | 998  | 18.9 | 124 | 1.2 |

|      |   |    |    |      |     |     |     |      |      |     |     |
|------|---|----|----|------|-----|-----|-----|------|------|-----|-----|
| 2020 | 9 | 16 | 6  | 19.1 | 0   | 0   | 0   | 998  | 19.2 | 126 | 1.4 |
| 2020 | 9 | 16 | 7  | 20.2 | 6   | 0   | 6   | 998  | 20.5 | 127 | 2.4 |
| 2020 | 9 | 16 | 8  | 20.9 | 21  | 0   | 21  | 998  | 21.6 | 134 | 2.9 |
| 2020 | 9 | 16 | 9  | 21   | 159 | 1   | 160 | 998  | 22.5 | 144 | 3.4 |
| 2020 | 9 | 16 | 10 | 21   | 295 | 59  | 335 | 998  | 23.4 | 155 | 3.5 |
| 2020 | 9 | 16 | 11 | 21.1 | 380 | 198 | 536 | 997  | 24   | 164 | 3.3 |
| 2020 | 9 | 16 | 12 | 21.4 | 232 | 674 | 796 | 997  | 24.6 | 174 | 3.3 |
| 2020 | 9 | 16 | 13 | 21.8 | 154 | 3   | 156 | 996  | 25.4 | 183 | 3   |
| 2020 | 9 | 16 | 14 | 22   | 66  | 0   | 66  | 996  | 25.7 | 196 | 2.7 |
| 2020 | 9 | 16 | 15 | 22   | 202 | 603 | 605 | 996  | 25.6 | 206 | 2.4 |
| 2020 | 9 | 16 | 16 | 22.1 | 170 | 7   | 173 | 996  | 25.1 | 210 | 2   |
| 2020 | 9 | 16 | 17 | 22.4 | 125 | 368 | 247 | 996  | 24.4 | 210 | 1.4 |
| 2020 | 9 | 16 | 18 | 22.2 | 49  | 112 | 63  | 996  | 22.9 | 221 | 0.8 |
| 2020 | 9 | 16 | 19 | 21.6 | 0   | 0   | 0   | 997  | 22   | 224 | 0.6 |
| 2020 | 9 | 16 | 20 | 21.2 | 0   | 0   | 0   | 997  | 21.6 | 241 | 0.6 |
| 2020 | 9 | 16 | 21 | 21   | 0   | 0   | 0   | 998  | 21.2 | 271 | 0.6 |
| 2020 | 9 | 16 | 22 | 20.8 | 0   | 0   | 0   | 998  | 20.9 | 298 | 0.6 |
| 2020 | 9 | 16 | 23 | 20.6 | 0   | 0   | 0   | 997  | 20.6 | 318 | 0.6 |
| 2020 | 9 | 17 | 0  | 20.3 | 0   | 0   | 0   | 998  | 20.3 | 318 | 0.7 |
| 2020 | 9 | 17 | 1  | 20   | 0   | 0   | 0   | 998  | 20   | 325 | 0.7 |
| 2020 | 9 | 17 | 2  | 19.6 | 0   | 0   | 0   | 997  | 19.6 | 324 | 0.8 |
| 2020 | 9 | 17 | 3  | 19.3 | 0   | 0   | 0   | 998  | 19.3 | 320 | 0.9 |
| 2020 | 9 | 17 | 4  | 19.2 | 0   | 0   | 0   | 997  | 19.2 | 326 | 0.9 |
| 2020 | 9 | 17 | 5  | 19.2 | 0   | 0   | 0   | 998  | 19.2 | 322 | 1   |
| 2020 | 9 | 17 | 6  | 19.2 | 0   | 0   | 0   | 998  | 19.2 | 326 | 0.9 |
| 2020 | 9 | 17 | 7  | 19.9 | 42  | 0   | 42  | 999  | 19.9 | 322 | 0.8 |
| 2020 | 9 | 17 | 8  | 20.8 | 106 | 0   | 106 | 999  | 21   | 299 | 0.8 |
| 2020 | 9 | 17 | 9  | 20.6 | 124 | 0   | 124 | 999  | 21.7 | 324 | 0.5 |
| 2020 | 9 | 17 | 10 | 19.3 | 304 | 81  | 360 | 999  | 22.5 | 303 | 0.6 |
| 2020 | 9 | 17 | 11 | 18.7 | 376 | 122 | 472 | 999  | 23.3 | 244 | 0.7 |
| 2020 | 9 | 17 | 12 | 18.3 | 386 | 70  | 444 | 998  | 22.9 | 201 | 1.2 |
| 2020 | 9 | 17 | 13 | 18.4 | 272 | 16  | 285 | 998  | 23   | 186 | 1.4 |
| 2020 | 9 | 17 | 14 | 18.7 | 255 | 15  | 266 | 997  | 23.7 | 191 | 1.2 |
| 2020 | 9 | 17 | 15 | 18.6 | 83  | 0   | 83  | 997  | 23.7 | 212 | 1.1 |
| 2020 | 9 | 17 | 16 | 18.8 | 105 | 0   | 105 | 998  | 23.2 | 231 | 1.3 |
| 2020 | 9 | 17 | 17 | 19.3 | 13  | 0   | 13  | 998  | 22.3 | 253 | 1.1 |
| 2020 | 9 | 17 | 18 | 19.6 | 39  | 15  | 41  | 998  | 21   | 280 | 1   |
| 2020 | 9 | 17 | 19 | 19.5 | 0   | 0   | 0   | 999  | 20.1 | 296 | 1.1 |
| 2020 | 9 | 17 | 20 | 19.3 | 0   | 0   | 0   | 999  | 19.6 | 305 | 1.1 |
| 2020 | 9 | 17 | 21 | 19.2 | 0   | 0   | 0   | 999  | 19.3 | 313 | 1   |
| 2020 | 9 | 17 | 22 | 19   | 0   | 0   | 0   | 999  | 19.1 | 320 | 1.1 |
| 2020 | 9 | 17 | 23 | 18.8 | 0   | 0   | 0   | 999  | 18.9 | 323 | 1.1 |
| 2020 | 9 | 18 | 0  | 18.5 | 0   | 0   | 0   | 999  | 18.7 | 313 | 1   |
| 2020 | 9 | 18 | 1  | 18.3 | 0   | 0   | 0   | 999  | 18.4 | 295 | 0.9 |
| 2020 | 9 | 18 | 2  | 18.1 | 0   | 0   | 0   | 1000 | 18.3 | 285 | 1.2 |
| 2020 | 9 | 18 | 3  | 17.9 | 0   | 0   | 0   | 1000 | 18.1 | 283 | 1.4 |
| 2020 | 9 | 18 | 4  | 17.5 | 0   | 0   | 0   | 1000 | 17.9 | 276 | 1.4 |
| 2020 | 9 | 18 | 5  | 17   | 0   | 0   | 0   | 1001 | 17.5 | 264 | 1.2 |
| 2020 | 9 | 18 | 6  | 17   | 0   | 0   | 0   | 1001 | 17.4 | 243 | 1.2 |
| 2020 | 9 | 18 | 7  | 17.4 | 46  | 189 | 72  | 1001 | 18   | 223 | 1.8 |

|      |   |    |    |      |     |     |     |      |      |     |     |
|------|---|----|----|------|-----|-----|-----|------|------|-----|-----|
| 2020 | 9 | 18 | 8  | 17.6 | 49  | 0   | 49  | 1002 | 18.7 | 218 | 2.5 |
| 2020 | 9 | 18 | 9  | 17.8 | 169 | 6   | 172 | 1002 | 20.1 | 231 | 2.9 |
| 2020 | 9 | 18 | 10 | 17.9 | 151 | 0   | 151 | 1002 | 21.4 | 245 | 3.1 |
| 2020 | 9 | 18 | 11 | 17.9 | 286 | 22  | 304 | 1002 | 21.9 | 254 | 3.2 |
| 2020 | 9 | 18 | 12 | 18   | 304 | 22  | 322 | 1002 | 22.1 | 261 | 3.3 |
| 2020 | 9 | 18 | 13 | 17.8 | 391 | 286 | 628 | 1002 | 22.3 | 269 | 3.1 |
| 2020 | 9 | 18 | 14 | 17.3 | 279 | 499 | 662 | 1001 | 22.4 | 279 | 2.9 |
| 2020 | 9 | 18 | 15 | 16.9 | 296 | 254 | 464 | 1002 | 22.3 | 289 | 2.6 |
| 2020 | 9 | 18 | 16 | 16.4 | 217 | 193 | 315 | 1002 | 21.9 | 296 | 2.2 |
| 2020 | 9 | 18 | 17 | 16.2 | 109 | 326 | 214 | 1002 | 20.7 | 302 | 1.7 |
| 2020 | 9 | 18 | 18 | 15.8 | 39  | 96  | 50  | 1002 | 18.3 | 305 | 1   |
| 2020 | 9 | 18 | 19 | 14.2 | 0   | 0   | 0   | 1003 | 16.8 | 305 | 1.1 |
| 2020 | 9 | 18 | 20 | 13.7 | 0   | 0   | 0   | 1004 | 16.3 | 301 | 1.1 |
| 2020 | 9 | 18 | 21 | 13.4 | 0   | 0   | 0   | 1004 | 15.9 | 296 | 1.1 |
| 2020 | 9 | 18 | 22 | 13.4 | 0   | 0   | 0   | 1004 | 15.5 | 291 | 1.2 |
| 2020 | 9 | 18 | 23 | 13.5 | 0   | 0   | 0   | 1004 | 15.2 | 288 | 1.2 |
| 2020 | 9 | 19 | 0  | 13.6 | 0   | 0   | 0   | 1004 | 15   | 289 | 1.2 |
| 2020 | 9 | 19 | 1  | 13.8 | 0   | 0   | 0   | 1004 | 14.7 | 289 | 1.2 |
| 2020 | 9 | 19 | 2  | 14   | 0   | 0   | 0   | 1004 | 14.3 | 285 | 1.2 |
| 2020 | 9 | 19 | 3  | 14   | 0   | 0   | 0   | 1004 | 14   | 279 | 1.2 |
| 2020 | 9 | 19 | 4  | 13.8 | 0   | 0   | 0   | 1004 | 13.8 | 274 | 1.2 |
| 2020 | 9 | 19 | 5  | 13.6 | 0   | 0   | 0   | 1005 | 13.6 | 271 | 1.1 |
| 2020 | 9 | 19 | 6  | 14   | 0   | 0   | 0   | 1005 | 14   | 267 | 1   |
| 2020 | 9 | 19 | 7  | 15.9 | 49  | 268 | 85  | 1005 | 16.2 | 257 | 0.8 |
| 2020 | 9 | 19 | 8  | 16.9 | 100 | 543 | 284 | 1005 | 18.2 | 249 | 1.3 |
| 2020 | 9 | 19 | 9  | 16.7 | 129 | 683 | 486 | 1005 | 20.1 | 254 | 2   |
| 2020 | 9 | 19 | 10 | 16.6 | 221 | 523 | 572 | 1005 | 21.3 | 254 | 2.4 |
| 2020 | 9 | 19 | 11 | 16.6 | 156 | 808 | 781 | 1005 | 22.2 | 255 | 2.8 |
| 2020 | 9 | 19 | 12 | 16.5 | 168 | 810 | 838 | 1004 | 23   | 261 | 3.1 |
| 2020 | 9 | 19 | 13 | 16.5 | 394 | 266 | 613 | 1004 | 23.4 | 267 | 3.6 |
| 2020 | 9 | 19 | 14 | 16.4 | 349 | 303 | 580 | 1004 | 23.3 | 269 | 3.7 |
| 2020 | 9 | 19 | 15 | 16.5 | 168 | 702 | 628 | 1004 | 22.7 | 272 | 3.4 |
| 2020 | 9 | 19 | 16 | 16.9 | 150 | 595 | 449 | 1004 | 22.2 | 273 | 2.9 |
| 2020 | 9 | 19 | 17 | 17.8 | 117 | 409 | 245 | 1004 | 21.2 | 271 | 1.9 |
| 2020 | 9 | 19 | 18 | 17.3 | 37  | 75  | 45  | 1004 | 18.7 | 266 | 1.1 |
| 2020 | 9 | 19 | 19 | 16.5 | 0   | 0   | 0   | 1004 | 17.5 | 268 | 1.1 |
| 2020 | 9 | 19 | 20 | 16.6 | 0   | 0   | 0   | 1004 | 16.9 | 278 | 1.1 |
| 2020 | 9 | 19 | 21 | 16.4 | 0   | 0   | 0   | 1004 | 16.4 | 290 | 1.1 |
| 2020 | 9 | 19 | 22 | 15.8 | 0   | 0   | 0   | 1004 | 15.8 | 305 | 1.1 |
| 2020 | 9 | 19 | 23 | 15.5 | 0   | 0   | 0   | 1004 | 15.5 | 318 | 1.1 |
| 2020 | 9 | 20 | 0  | 15.3 | 0   | 0   | 0   | 1004 | 15.3 | 330 | 1   |
| 2020 | 9 | 20 | 1  | 14.9 | 0   | 0   | 0   | 1004 | 14.9 | 343 | 0.9 |
| 2020 | 9 | 20 | 2  | 14.5 | 0   | 0   | 0   | 1004 | 14.5 | 352 | 0.9 |
| 2020 | 9 | 20 | 3  | 13.9 | 0   | 0   | 0   | 1004 | 13.9 | 358 | 0.9 |
| 2020 | 9 | 20 | 4  | 13.5 | 0   | 0   | 0   | 1004 | 13.5 | 359 | 1   |
| 2020 | 9 | 20 | 5  | 13.2 | 0   | 0   | 0   | 1005 | 13.2 | 357 | 1   |
| 2020 | 9 | 20 | 6  | 13.1 | 0   | 0   | 0   | 1005 | 13.1 | 358 | 0.9 |
| 2020 | 9 | 20 | 7  | 15.1 | 45  | 296 | 84  | 1005 | 15.7 | 4   | 0.9 |
| 2020 | 9 | 20 | 8  | 16   | 92  | 567 | 283 | 1006 | 18.2 | 1   | 1.5 |
| 2020 | 9 | 20 | 9  | 15.5 | 122 | 698 | 484 | 1006 | 20.5 | 349 | 1.9 |

|      |   |    |    |      |     |     |     |      |      |     |     |
|------|---|----|----|------|-----|-----|-----|------|------|-----|-----|
| 2020 | 9 | 20 | 10 | 14.9 | 145 | 759 | 652 | 1006 | 21.9 | 341 | 2.1 |
| 2020 | 9 | 20 | 11 | 15.1 | 164 | 786 | 771 | 1006 | 22.7 | 328 | 2.2 |
| 2020 | 9 | 20 | 12 | 15.4 | 165 | 815 | 835 | 1006 | 23.4 | 322 | 2.4 |
| 2020 | 9 | 20 | 13 | 15.5 | 169 | 802 | 826 | 1005 | 23.8 | 320 | 2.6 |
| 2020 | 9 | 20 | 14 | 15.7 | 162 | 786 | 760 | 1005 | 23.9 | 318 | 2.7 |
| 2020 | 9 | 20 | 15 | 15.8 | 173 | 687 | 619 | 1004 | 23.6 | 318 | 2.6 |
| 2020 | 9 | 20 | 16 | 16.3 | 145 | 607 | 446 | 1004 | 23   | 318 | 2.2 |
| 2020 | 9 | 20 | 17 | 16.6 | 104 | 459 | 246 | 1004 | 21.7 | 322 | 1.7 |
| 2020 | 9 | 20 | 18 | 16.2 | 38  | 172 | 56  | 1004 | 18.7 | 331 | 1.1 |
| 2020 | 9 | 20 | 19 | 14.8 | 0   | 0   | 0   | 1004 | 17.3 | 344 | 1.1 |
| 2020 | 9 | 20 | 20 | 14.3 | 0   | 0   | 0   | 1005 | 16.6 | 353 | 1.1 |
| 2020 | 9 | 20 | 21 | 13.9 | 0   | 0   | 0   | 1005 | 16.1 | 352 | 1.1 |
| 2020 | 9 | 20 | 22 | 13.7 | 0   | 0   | 0   | 1006 | 15.6 | 353 | 1.1 |
| 2020 | 9 | 20 | 23 | 13.5 | 0   | 0   | 0   | 1006 | 15.1 | 6   | 1.1 |
| 2020 | 9 | 21 | 0  | 13.2 | 0   | 0   | 0   | 1006 | 14.5 | 21  | 1.1 |
| 2020 | 9 | 21 | 1  | 12.7 | 0   | 0   | 0   | 1005 | 13.7 | 30  | 1.2 |
| 2020 | 9 | 21 | 2  | 12.1 | 0   | 0   | 0   | 1005 | 13   | 38  | 1.2 |
| 2020 | 9 | 21 | 3  | 11.2 | 0   | 0   | 0   | 1005 | 12.6 | 47  | 1.2 |
| 2020 | 9 | 21 | 4  | 10.5 | 0   | 0   | 0   | 1005 | 12.3 | 54  | 1.2 |
| 2020 | 9 | 21 | 5  | 10   | 0   | 0   | 0   | 1005 | 12.2 | 59  | 1.2 |
| 2020 | 9 | 21 | 6  | 10   | 0   | 0   | 0   | 1006 | 12.1 | 69  | 1.1 |
| 2020 | 9 | 21 | 7  | 12.5 | 44  | 31  | 48  | 1006 | 14.5 | 81  | 1   |
| 2020 | 9 | 21 | 8  | 12.4 | 92  | 490 | 255 | 1006 | 16.8 | 91  | 1.8 |
| 2020 | 9 | 21 | 9  | 13.4 | 191 | 389 | 392 | 1006 | 18.8 | 97  | 1.7 |
| 2020 | 9 | 21 | 10 | 13.2 | 284 | 329 | 503 | 1006 | 20.6 | 104 | 1.4 |
| 2020 | 9 | 21 | 11 | 12.8 | 319 | 406 | 631 | 1006 | 21.5 | 104 | 1   |
| 2020 | 9 | 21 | 12 | 12.8 | 323 | 453 | 694 | 1005 | 22.7 | 74  | 0.7 |
| 2020 | 9 | 21 | 13 | 13   | 304 | 502 | 713 | 1005 | 23.4 | 38  | 0.7 |
| 2020 | 9 | 21 | 14 | 13.2 | 151 | 821 | 772 | 1004 | 23.7 | 20  | 1.1 |
| 2020 | 9 | 21 | 15 | 13.5 | 136 | 781 | 639 | 1003 | 23.5 | 15  | 1.5 |
| 2020 | 9 | 21 | 16 | 14.5 | 118 | 690 | 457 | 1003 | 22.9 | 12  | 1.5 |
| 2020 | 9 | 21 | 17 | 14.6 | 93  | 511 | 248 | 1003 | 22   | 15  | 1.2 |
| 2020 | 9 | 21 | 18 | 15.4 | 37  | 182 | 55  | 1003 | 19.6 | 34  | 0.8 |
| 2020 | 9 | 21 | 19 | 14.5 | 0   | 0   | 0   | 1004 | 18.6 | 54  | 0.9 |
| 2020 | 9 | 21 | 20 | 14.3 | 0   | 0   | 0   | 1004 | 17.7 | 81  | 0.9 |
| 2020 | 9 | 21 | 21 | 14.3 | 0   | 0   | 0   | 1004 | 16.9 | 102 | 1.1 |
| 2020 | 9 | 21 | 22 | 14.2 | 0   | 0   | 0   | 1005 | 16.2 | 106 | 1.2 |
| 2020 | 9 | 21 | 23 | 14.2 | 0   | 0   | 0   | 1005 | 15.7 | 101 | 1.3 |
| 2020 | 9 | 22 | 0  | 14.1 | 0   | 0   | 0   | 1005 | 15.3 | 95  | 1.4 |
| 2020 | 9 | 22 | 1  | 14   | 0   | 0   | 0   | 1005 | 15   | 90  | 1.6 |
| 2020 | 9 | 22 | 2  | 13.9 | 0   | 0   | 0   | 1005 | 14.7 | 86  | 1.6 |
| 2020 | 9 | 22 | 3  | 13.6 | 0   | 0   | 0   | 1005 | 14.4 | 81  | 1.4 |
| 2020 | 9 | 22 | 4  | 13.4 | 0   | 0   | 0   | 1005 | 14.2 | 75  | 1.4 |
| 2020 | 9 | 22 | 5  | 13.2 | 0   | 0   | 0   | 1005 | 13.9 | 74  | 1.4 |
| 2020 | 9 | 22 | 6  | 13   | 0   | 0   | 0   | 1005 | 13.8 | 75  | 1.3 |
| 2020 | 9 | 22 | 7  | 13.6 | 16  | 0   | 16  | 1006 | 14.7 | 73  | 1.5 |
| 2020 | 9 | 22 | 8  | 13.7 | 88  | 0   | 88  | 1006 | 15.8 | 69  | 2   |
| 2020 | 9 | 22 | 9  | 14.1 | 182 | 15  | 190 | 1006 | 16.7 | 65  | 2   |
| 2020 | 9 | 22 | 10 | 14.1 | 308 | 172 | 421 | 1006 | 17.7 | 67  | 2.6 |
| 2020 | 9 | 22 | 11 | 14.1 | 347 | 69  | 399 | 1005 | 18.7 | 67  | 3.1 |

|      |   |    |    |      |     |     |     |      |      |    |     |
|------|---|----|----|------|-----|-----|-----|------|------|----|-----|
| 2020 | 9 | 22 | 12 | 14.5 | 359 | 51  | 400 | 1005 | 20.7 | 65 | 3.4 |
| 2020 | 9 | 22 | 13 | 14.4 | 379 | 298 | 621 | 1004 | 21.6 | 66 | 3.3 |
| 2020 | 9 | 22 | 14 | 14.4 | 136 | 840 | 768 | 1003 | 22   | 68 | 3.1 |
| 2020 | 9 | 22 | 15 | 14.6 | 117 | 813 | 638 | 1003 | 21.9 | 71 | 2.9 |
| 2020 | 9 | 22 | 16 | 15   | 104 | 722 | 455 | 1003 | 21.5 | 74 | 2.5 |
| 2020 | 9 | 22 | 17 | 15.8 | 80  | 560 | 248 | 1003 | 20.3 | 76 | 1.8 |
| 2020 | 9 | 22 | 18 | 15.3 | 34  | 215 | 54  | 1003 | 17.3 | 75 | 1.1 |
| 2020 | 9 | 22 | 19 | 14.2 | 0   | 0   | 0   | 1003 | 15.8 | 74 | 1.3 |
| 2020 | 9 | 22 | 20 | 13.6 | 0   | 0   | 0   | 1004 | 15.1 | 72 | 1.4 |
| 2020 | 9 | 22 | 21 | 13   | 0   | 0   | 0   | 1004 | 14.3 | 68 | 1.4 |
| 2020 | 9 | 22 | 22 | 12.5 | 0   | 0   | 0   | 1005 | 13.7 | 59 | 1.4 |
| 2020 | 9 | 22 | 23 | 12.5 | 0   | 0   | 0   | 1005 | 13.7 | 53 | 1.3 |
| 2020 | 9 | 23 | 0  | 12.3 | 0   | 0   | 0   | 1004 | 13.5 | 50 | 1.3 |
| 2020 | 9 | 23 | 1  | 12.1 | 0   | 0   | 0   | 1004 | 13.3 | 47 | 1.4 |
| 2020 | 9 | 23 | 2  | 11.9 | 0   | 0   | 0   | 1004 | 13   | 44 | 1.4 |
| 2020 | 9 | 23 | 3  | 11.9 | 0   | 0   | 0   | 1004 | 13   | 45 | 1.4 |
| 2020 | 9 | 23 | 4  | 11.9 | 0   | 0   | 0   | 1004 | 12.9 | 49 | 1.4 |
| 2020 | 9 | 23 | 5  | 11.9 | 0   | 0   | 0   | 1004 | 12.8 | 51 | 1.3 |
| 2020 | 9 | 23 | 6  | 11.9 | 0   | 0   | 0   | 1004 | 12.6 | 57 | 1.2 |
| 2020 | 9 | 23 | 7  | 12.8 | 42  | 38  | 47  | 1004 | 14.1 | 65 | 1.6 |
| 2020 | 9 | 23 | 8  | 13.2 | 125 | 229 | 200 | 1004 | 15.3 | 71 | 2.2 |
| 2020 | 9 | 23 | 9  | 13.8 | 221 | 188 | 317 | 1004 | 17   | 73 | 2.5 |
| 2020 | 9 | 23 | 10 | 14.5 | 258 | 31  | 279 | 1004 | 18.6 | 77 | 3.2 |
| 2020 | 9 | 23 | 11 | 15.3 | 202 | 7   | 208 | 1004 | 20.4 | 79 | 3.4 |
| 2020 | 9 | 23 | 12 | 15.9 | 302 | 23  | 321 | 1004 | 21.7 | 82 | 3.3 |
| 2020 | 9 | 23 | 13 | 16.2 | 394 | 215 | 567 | 1003 | 22.3 | 83 | 3.1 |
| 2020 | 9 | 23 | 14 | 16.4 | 259 | 17  | 272 | 1003 | 22.6 | 82 | 3   |
| 2020 | 9 | 23 | 15 | 16.5 | 229 | 19  | 241 | 1002 | 22.6 | 79 | 2.8 |
| 2020 | 9 | 23 | 16 | 16.8 | 110 | 0   | 110 | 1002 | 22.2 | 76 | 2.5 |
| 2020 | 9 | 23 | 17 | 17.4 | 87  | 0   | 87  | 1002 | 21.1 | 75 | 1.7 |
| 2020 | 9 | 23 | 18 | 16.9 | 16  | 0   | 16  | 1002 | 18.7 | 75 | 1.1 |
| 2020 | 9 | 23 | 19 | 15.9 | 0   | 0   | 0   | 1003 | 17.4 | 72 | 1.2 |
| 2020 | 9 | 23 | 20 | 15.4 | 0   | 0   | 0   | 1003 | 16.7 | 69 | 1.3 |
| 2020 | 9 | 23 | 21 | 14.9 | 0   | 0   | 0   | 1003 | 16   | 67 | 1.3 |
| 2020 | 9 | 23 | 22 | 14.4 | 0   | 0   | 0   | 1003 | 15.4 | 64 | 1.3 |
| 2020 | 9 | 23 | 23 | 14   | 0   | 0   | 0   | 1003 | 14.9 | 61 | 1.4 |
| 2020 | 9 | 24 | 0  | 14   | 0   | 0   | 0   | 1003 | 14.8 | 61 | 1.6 |
| 2020 | 9 | 24 | 1  | 14.1 | 0   | 0   | 0   | 1003 | 14.7 | 62 | 1.7 |
| 2020 | 9 | 24 | 2  | 14.2 | 0   | 0   | 0   | 1002 | 14.6 | 65 | 1.8 |
| 2020 | 9 | 24 | 3  | 14.2 | 0   | 0   | 0   | 1002 | 14.6 | 69 | 1.9 |
| 2020 | 9 | 24 | 4  | 14.2 | 0   | 0   | 0   | 1002 | 14.7 | 72 | 2   |
| 2020 | 9 | 24 | 5  | 14.1 | 0   | 0   | 0   | 1002 | 14.8 | 73 | 2.2 |
| 2020 | 9 | 24 | 6  | 14   | 0   | 0   | 0   | 1002 | 14.7 | 74 | 2   |
| 2020 | 9 | 24 | 7  | 14.6 | 41  | 276 | 75  | 1002 | 16.2 | 75 | 2.7 |
| 2020 | 9 | 24 | 8  | 15.4 | 129 | 133 | 173 | 1002 | 18   | 77 | 3.2 |
| 2020 | 9 | 24 | 9  | 16.4 | 188 | 23  | 200 | 1002 | 20   | 79 | 3.3 |
| 2020 | 9 | 24 | 10 | 17.2 | 293 | 79  | 344 | 1001 | 21.7 | 76 | 2.9 |
| 2020 | 9 | 24 | 11 | 17.7 | 360 | 237 | 540 | 1001 | 23.1 | 63 | 2.3 |
| 2020 | 9 | 24 | 12 | 18   | 138 | 836 | 814 | 1000 | 23.9 | 47 | 2   |
| 2020 | 9 | 24 | 13 | 18   | 360 | 353 | 643 | 1000 | 24.4 | 40 | 1.7 |



|      |   |    |    |      |     |     |     |      |      |    |     |
|------|---|----|----|------|-----|-----|-----|------|------|----|-----|
| 2020 | 9 | 24 | 14 | 17.8 | 351 | 105 | 429 | 999  | 24.4 | 37 | 1.4 |
| 2020 | 9 | 24 | 15 | 17.7 | 126 | 758 | 604 | 999  | 24   | 29 | 1.3 |
| 2020 | 9 | 24 | 16 | 18.3 | 111 | 664 | 427 | 999  | 23.6 | 18 | 1.1 |
| 2020 | 9 | 24 | 17 | 18.6 | 17  | 0   | 17  | 999  | 22.7 | 16 | 0.9 |
| 2020 | 9 | 24 | 18 | 18.7 | 4   | 0   | 4   | 999  | 21.4 | 20 | 0.6 |
| 2020 | 9 | 24 | 19 | 18   | 0   | 0   | 0   | 999  | 20.6 | 42 | 0.7 |
| 2020 | 9 | 24 | 20 | 18   | 0   | 0   | 0   | 1000 | 19.6 | 68 | 0.8 |
| 2020 | 9 | 24 | 21 | 17.5 | 0   | 0   | 0   | 1000 | 18.7 | 82 | 1   |
| 2020 | 9 | 24 | 22 | 16.8 | 0   | 0   | 0   | 1000 | 17.8 | 86 | 1.1 |
| 2020 | 9 | 24 | 23 | 15.9 | 0   | 0   | 0   | 1000 | 16.9 | 79 | 1.1 |
| 2020 | 9 | 25 | 0  | 14.7 | 0   | 0   | 0   | 1000 | 15.7 | 65 | 1   |
| 2020 | 9 | 25 | 1  | 14   | 0   | 0   | 0   | 1000 | 14.8 | 50 | 1   |
| 2020 | 9 | 25 | 2  | 13.5 | 0   | 0   | 0   | 999  | 14   | 40 | 1.1 |
| 2020 | 9 | 25 | 3  | 13.3 | 0   | 0   | 0   | 999  | 13.4 | 36 | 1.1 |
| 2020 | 9 | 25 | 4  | 12.9 | 0   | 0   | 0   | 999  | 12.9 | 32 | 1.1 |
| 2020 | 9 | 25 | 5  | 12.5 | 0   | 0   | 0   | 999  | 12.5 | 28 | 1.1 |
| 2020 | 9 | 25 | 6  | 12.2 | 0   | 0   | 0   | 999  | 12.2 | 25 | 1   |
| 2020 | 9 | 25 | 7  | 13.9 | 40  | 300 | 76  | 999  | 14.7 | 21 | 1.8 |
| 2020 | 9 | 25 | 8  | 15.1 | 80  | 603 | 275 | 999  | 16.8 | 11 | 2.1 |
| 2020 | 9 | 25 | 9  | 15.9 | 103 | 742 | 478 | 1000 | 19.8 | 18 | 2.6 |
| 2020 | 9 | 25 | 10 | 16.3 | 119 | 810 | 647 | 999  | 21.6 | 16 | 2.8 |
| 2020 | 9 | 25 | 11 | 16.7 | 129 | 845 | 766 | 999  | 22.9 | 19 | 3.1 |
| 2020 | 9 | 25 | 12 | 17.2 | 132 | 861 | 824 | 998  | 23.9 | 22 | 2.9 |
| 2020 | 9 | 25 | 13 | 17.7 | 133 | 852 | 813 | 997  | 24.6 | 28 | 2.6 |
| 2020 | 9 | 25 | 14 | 18.2 | 355 | 148 | 464 | 997  | 24.9 | 28 | 2.2 |
| 2020 | 9 | 25 | 15 | 18.4 | 129 | 750 | 599 | 997  | 24.8 | 18 | 1.9 |
| 2020 | 9 | 25 | 16 | 18.9 | 200 | 194 | 292 | 998  | 24.1 | 2  | 1.5 |
| 2020 | 9 | 25 | 17 | 19.4 | 16  | 0   | 16  | 998  | 23   | 3  | 1.2 |
| 2020 | 9 | 25 | 18 | 19.5 | 4   | 0   | 4   | 999  | 21.2 | 13 | 0.8 |
| 2020 | 9 | 25 | 19 | 18.9 | 0   | 0   | 0   | 999  | 20.3 | 32 | 0.8 |
| 2020 | 9 | 25 | 20 | 18.9 | 0   | 0   | 0   | 1000 | 20   | 55 | 0.8 |
| 2020 | 9 | 25 | 21 | 18.6 | 0   | 0   | 0   | 1000 | 19.5 | 76 | 0.9 |
| 2020 | 9 | 25 | 22 | 18.1 | 0   | 0   | 0   | 1000 | 19.1 | 89 | 1.1 |
| 2020 | 9 | 25 | 23 | 17.6 | 0   | 0   | 0   | 1000 | 18.5 | 98 | 1.3 |
| 2020 | 9 | 26 | 0  | 17   | 0   | 0   | 0   | 1000 | 18   | 97 | 1.3 |
| 2020 | 9 | 26 | 1  | 16.3 | 0   | 0   | 0   | 1000 | 17.4 | 88 | 1.1 |
| 2020 | 9 | 26 | 2  | 15.7 | 0   | 0   | 0   | 1000 | 16.8 | 73 | 0.9 |
| 2020 | 9 | 26 | 3  | 15.1 | 0   | 0   | 0   | 1000 | 16.2 | 56 | 0.9 |
| 2020 | 9 | 26 | 4  | 14.6 | 0   | 0   | 0   | 1001 | 15.5 | 40 | 0.9 |
| 2020 | 9 | 26 | 5  | 14.1 | 0   | 0   | 0   | 1001 | 14.9 | 29 | 0.9 |
| 2020 | 9 | 26 | 6  | 13.7 | 0   | 0   | 0   | 1002 | 14.5 | 29 | 0.9 |
| 2020 | 9 | 26 | 7  | 14.3 | 40  | 90  | 51  | 1002 | 15.9 | 32 | 1.4 |
| 2020 | 9 | 26 | 8  | 14.3 | 126 | 158 | 176 | 1002 | 17.5 | 39 | 2   |
| 2020 | 9 | 26 | 9  | 14.5 | 198 | 325 | 361 | 1002 | 19.7 | 52 | 2.1 |
| 2020 | 9 | 26 | 10 | 14.7 | 127 | 786 | 637 | 1002 | 21.4 | 58 | 1.8 |
| 2020 | 9 | 26 | 11 | 15.1 | 135 | 830 | 758 | 1002 | 22.7 | 63 | 1.5 |
| 2020 | 9 | 26 | 12 | 15.5 | 133 | 858 | 820 | 1002 | 23.6 | 70 | 1.3 |
| 2020 | 9 | 26 | 13 | 15.8 | 130 | 860 | 813 | 1001 | 24.2 | 77 | 1.2 |
| 2020 | 9 | 26 | 14 | 15.9 | 124 | 841 | 741 | 1001 | 24.5 | 80 | 1   |
| 2020 | 9 | 26 | 15 | 15.9 | 125 | 770 | 604 | 1001 | 24.4 | 85 | 1.1 |

|      |   |    |    |      |     |     |     |      |      |     |     |
|------|---|----|----|------|-----|-----|-----|------|------|-----|-----|
| 2020 | 9 | 26 | 16 | 16.3 | 47  | 0   | 47  | 1001 | 24   | 90  | 0.9 |
| 2020 | 9 | 26 | 17 | 17   | 16  | 0   | 16  | 1001 | 22.6 | 96  | 1.1 |
| 2020 | 9 | 26 | 18 | 18.4 | 4   | 0   | 4   | 1002 | 20.8 | 99  | 0.8 |
| 2020 | 9 | 26 | 19 | 17.9 | 0   | 0   | 0   | 1002 | 19.9 | 101 | 0.9 |
| 2020 | 9 | 26 | 20 | 17.5 | 0   | 0   | 0   | 1003 | 19.2 | 104 | 1   |
| 2020 | 9 | 26 | 21 | 16.9 | 0   | 0   | 0   | 1003 | 18.3 | 106 | 1.2 |
| 2020 | 9 | 26 | 22 | 16.2 | 0   | 0   | 0   | 1003 | 17.2 | 104 | 1.2 |
| 2020 | 9 | 26 | 23 | 15.6 | 0   | 0   | 0   | 1004 | 16.3 | 99  | 1.2 |
| 2020 | 9 | 27 | 0  | 14.9 | 0   | 0   | 0   | 1004 | 15.5 | 89  | 1.1 |
| 2020 | 9 | 27 | 1  | 14.2 | 0   | 0   | 0   | 1004 | 14.9 | 78  | 1.2 |
| 2020 | 9 | 27 | 2  | 13.9 | 0   | 0   | 0   | 1004 | 14.6 | 74  | 1.3 |
| 2020 | 9 | 27 | 3  | 13.9 | 0   | 0   | 0   | 1005 | 14.4 | 74  | 1.4 |
| 2020 | 9 | 27 | 4  | 13.9 | 0   | 0   | 0   | 1005 | 14.4 | 74  | 1.6 |
| 2020 | 9 | 27 | 5  | 13.8 | 0   | 0   | 0   | 1005 | 14   | 75  | 1.6 |
| 2020 | 9 | 27 | 6  | 13.6 | 0   | 0   | 0   | 1005 | 13.6 | 78  | 1.5 |
| 2020 | 9 | 27 | 7  | 14.3 | 38  | 317 | 74  | 1006 | 15.6 | 80  | 2.4 |
| 2020 | 9 | 27 | 8  | 14.9 | 73  | 637 | 276 | 1006 | 17.7 | 81  | 2.8 |
| 2020 | 9 | 27 | 9  | 15.2 | 90  | 781 | 480 | 1006 | 19.6 | 78  | 2.7 |
| 2020 | 9 | 27 | 10 | 15.3 | 101 | 855 | 653 | 1006 | 21.2 | 69  | 2.3 |
| 2020 | 9 | 27 | 11 | 15.3 | 109 | 890 | 774 | 1006 | 22.5 | 57  | 2.1 |
| 2020 | 9 | 27 | 12 | 15.5 | 114 | 899 | 830 | 1005 | 23.3 | 53  | 1.8 |
| 2020 | 9 | 27 | 13 | 15.6 | 112 | 896 | 820 | 1005 | 23.8 | 53  | 1.4 |
| 2020 | 9 | 27 | 14 | 15.6 | 109 | 873 | 746 | 1004 | 24   | 53  | 1.1 |
| 2020 | 9 | 27 | 15 | 15.4 | 117 | 792 | 606 | 1004 | 23.8 | 55  | 0.8 |
| 2020 | 9 | 27 | 16 | 15.6 | 187 | 263 | 309 | 1004 | 23.4 | 58  | 0.5 |
| 2020 | 9 | 27 | 17 | 15.9 | 80  | 502 | 218 | 1004 | 22.4 | 46  | 0.2 |
| 2020 | 9 | 27 | 18 | 17.2 | 17  | 0   | 17  | 1004 | 21.3 | 353 | 0.1 |
| 2020 | 9 | 27 | 19 | 16.6 | 0   | 0   | 0   | 1005 | 20.8 | 14  | 0.2 |
| 2020 | 9 | 27 | 20 | 15.8 | 0   | 0   | 0   | 1005 | 20.3 | 73  | 0.4 |
| 2020 | 9 | 27 | 21 | 16.1 | 0   | 0   | 0   | 1005 | 19.1 | 109 | 0.7 |
| 2020 | 9 | 27 | 22 | 16.5 | 0   | 0   | 0   | 1006 | 18   | 119 | 0.9 |
| 2020 | 9 | 27 | 23 | 16.2 | 0   | 0   | 0   | 1006 | 17.3 | 118 | 1.2 |
| 2020 | 9 | 28 | 0  | 15.7 | 0   | 0   | 0   | 1006 | 16.6 | 111 | 1.6 |
| 2020 | 9 | 28 | 1  | 14.8 | 0   | 0   | 0   | 1006 | 15.3 | 103 | 1.5 |
| 2020 | 9 | 28 | 2  | 13.9 | 0   | 0   | 0   | 1006 | 14.2 | 97  | 1.3 |
| 2020 | 9 | 28 | 3  | 13.2 | 0   | 0   | 0   | 1006 | 13.5 | 94  | 1.2 |
| 2020 | 9 | 28 | 4  | 12.8 | 0   | 0   | 0   | 1005 | 12.9 | 94  | 1.2 |
| 2020 | 9 | 28 | 5  | 12.5 | 0   | 0   | 0   | 1006 | 12.5 | 94  | 1.3 |
| 2020 | 9 | 28 | 6  | 12.3 | 0   | 0   | 0   | 1006 | 12.3 | 95  | 1.3 |
| 2020 | 9 | 28 | 7  | 13   | 38  | 295 | 71  | 1006 | 14.1 | 96  | 2.2 |
| 2020 | 9 | 28 | 8  | 13.7 | 113 | 287 | 203 | 1006 | 15.9 | 99  | 2.4 |
| 2020 | 9 | 28 | 9  | 13.9 | 102 | 755 | 477 | 1006 | 18.2 | 96  | 2.5 |
| 2020 | 9 | 28 | 10 | 13.9 | 251 | 412 | 516 | 1006 | 19.8 | 87  | 2.3 |
| 2020 | 9 | 28 | 11 | 13.8 | 127 | 867 | 772 | 1005 | 21.1 | 79  | 2.1 |
| 2020 | 9 | 28 | 12 | 13.8 | 128 | 884 | 829 | 1005 | 21.9 | 80  | 1.8 |
| 2020 | 9 | 28 | 13 | 13.9 | 128 | 882 | 821 | 1004 | 22.4 | 84  | 1.6 |
| 2020 | 9 | 28 | 14 | 13.9 | 240 | 550 | 639 | 1003 | 22.6 | 83  | 1.4 |
| 2020 | 9 | 28 | 15 | 13.9 | 110 | 819 | 611 | 1003 | 22.6 | 75  | 1.2 |
| 2020 | 9 | 28 | 16 | 14.2 | 94  | 735 | 430 | 1002 | 22.3 | 58  | 1   |
| 2020 | 9 | 28 | 17 | 15.6 | 69  | 571 | 222 | 1002 | 21.4 | 43  | 0.8 |

|      |   |    |    |      |     |     |     |      |      |     |     |
|------|---|----|----|------|-----|-----|-----|------|------|-----|-----|
| 2020 | 9 | 28 | 18 | 14.3 | 23  | 190 | 35  | 1002 | 19.3 | 31  | 0.7 |
| 2020 | 9 | 28 | 19 | 13.3 | 0   | 0   | 0   | 1002 | 18.4 | 27  | 0.8 |
| 2020 | 9 | 28 | 20 | 12.9 | 0   | 0   | 0   | 1003 | 18   | 36  | 0.7 |
| 2020 | 9 | 28 | 21 | 12.3 | 0   | 0   | 0   | 1002 | 18   | 61  | 0.6 |
| 2020 | 9 | 28 | 22 | 12.3 | 0   | 0   | 0   | 1002 | 17.5 | 99  | 0.6 |
| 2020 | 9 | 28 | 23 | 12.5 | 0   | 0   | 0   | 1002 | 16.2 | 110 | 0.7 |
| 2020 | 9 | 29 | 0  | 12.7 | 0   | 0   | 0   | 1002 | 15.2 | 110 | 0.9 |
| 2020 | 9 | 29 | 1  | 12.9 | 0   | 0   | 0   | 1002 | 14.3 | 111 | 1   |
| 2020 | 9 | 29 | 2  | 13.1 | 0   | 0   | 0   | 1002 | 13.9 | 112 | 0.9 |
| 2020 | 9 | 29 | 3  | 13.2 | 0   | 0   | 0   | 1002 | 14   | 112 | 0.5 |
| 2020 | 9 | 29 | 4  | 13.3 | 0   | 0   | 0   | 1002 | 14   | 99  | 0.1 |
| 2020 | 9 | 29 | 5  | 13.3 | 0   | 0   | 0   | 1002 | 13.6 | 27  | 0.1 |
| 2020 | 9 | 29 | 6  | 13.2 | 0   | 0   | 0   | 1002 | 13.3 | 63  | 0.4 |
| 2020 | 9 | 29 | 7  | 13.5 | 37  | 141 | 52  | 1001 | 14   | 79  | 0.7 |
| 2020 | 9 | 29 | 8  | 14.1 | 95  | 414 | 224 | 1001 | 15.6 | 86  | 1.5 |
| 2020 | 9 | 29 | 9  | 14.7 | 141 | 550 | 412 | 1000 | 17.3 | 81  | 1.3 |
| 2020 | 9 | 29 | 10 | 14   | 276 | 312 | 475 | 1000 | 19.8 | 54  | 1.4 |
| 2020 | 9 | 29 | 11 | 13.7 | 126 | 869 | 768 | 999  | 20.9 | 35  | 1.5 |
| 2020 | 9 | 29 | 12 | 13.7 | 131 | 882 | 827 | 998  | 21.4 | 29  | 1.5 |
| 2020 | 9 | 29 | 13 | 13.9 | 371 | 94  | 445 | 998  | 21.7 | 23  | 1.3 |
| 2020 | 9 | 29 | 14 | 14.2 | 132 | 843 | 740 | 997  | 21.8 | 357 | 1.3 |
| 2020 | 9 | 29 | 15 | 14.2 | 267 | 75  | 312 | 997  | 22   | 340 | 1.5 |
| 2020 | 9 | 29 | 16 | 14.1 | 131 | 531 | 371 | 997  | 21.7 | 340 | 1.7 |
| 2020 | 9 | 29 | 17 | 15.6 | 87  | 445 | 205 | 997  | 20.2 | 344 | 1.4 |
| 2020 | 9 | 29 | 18 | 14.8 | 21  | 91  | 26  | 997  | 17.3 | 348 | 1.2 |
| 2020 | 9 | 29 | 19 | 14.3 | 0   | 0   | 0   | 997  | 16.3 | 355 | 1.3 |
| 2020 | 9 | 29 | 20 | 14.1 | 0   | 0   | 0   | 997  | 15.8 | 3   | 1.3 |
| 2020 | 9 | 29 | 21 | 13.7 | 0   | 0   | 0   | 997  | 15.2 | 9   | 1.2 |
| 2020 | 9 | 29 | 22 | 13.4 | 0   | 0   | 0   | 997  | 14.8 | 11  | 1.1 |
| 2020 | 9 | 29 | 23 | 13.1 | 0   | 0   | 0   | 997  | 14.4 | 12  | 1   |
| 2020 | 9 | 30 | 0  | 12.6 | 0   | 0   | 0   | 998  | 13.8 | 13  | 1.1 |
| 2020 | 9 | 30 | 1  | 12.3 | 0   | 0   | 0   | 998  | 13.4 | 14  | 1.2 |
| 2020 | 9 | 30 | 2  | 12   | 0   | 0   | 0   | 997  | 13.1 | 16  | 1.3 |
| 2020 | 9 | 30 | 3  | 11.9 | 0   | 0   | 0   | 997  | 12.8 | 19  | 1.3 |
| 2020 | 9 | 30 | 4  | 11.9 | 0   | 0   | 0   | 997  | 12.6 | 20  | 1.3 |
| 2020 | 9 | 30 | 5  | 12   | 0   | 0   | 0   | 997  | 12.4 | 20  | 1.3 |
| 2020 | 9 | 30 | 6  | 12.1 | 0   | 0   | 0   | 997  | 12.3 | 21  | 1.2 |
| 2020 | 9 | 30 | 7  | 13.2 | 41  | 152 | 57  | 998  | 14.3 | 21  | 1.5 |
| 2020 | 9 | 30 | 8  | 14.1 | 112 | 423 | 242 | 998  | 16.5 | 15  | 2   |
| 2020 | 9 | 30 | 9  | 15.3 | 159 | 559 | 433 | 998  | 19.2 | 4   | 2.3 |
| 2020 | 9 | 30 | 10 | 15.8 | 197 | 623 | 593 | 998  | 21.1 | 2   | 2.5 |
| 2020 | 9 | 30 | 11 | 16.2 | 228 | 651 | 707 | 998  | 22.1 | 359 | 2.5 |
| 2020 | 9 | 30 | 12 | 16.6 | 211 | 714 | 771 | 997  | 22.8 | 356 | 2.5 |
| 2020 | 9 | 30 | 13 | 16.8 | 216 | 697 | 758 | 997  | 23.2 | 347 | 2.5 |
| 2020 | 9 | 30 | 14 | 16.9 | 216 | 648 | 680 | 997  | 23.2 | 338 | 2.6 |
| 2020 | 9 | 30 | 15 | 17   | 186 | 613 | 556 | 997  | 22.9 | 333 | 2.7 |
| 2020 | 9 | 30 | 16 | 17.4 | 163 | 482 | 379 | 997  | 22.2 | 328 | 2.7 |
| 2020 | 9 | 30 | 17 | 18.1 | 110 | 284 | 184 | 997  | 20.8 | 323 | 2.2 |
| 2020 | 9 | 30 | 18 | 17.6 | 17  | 27  | 18  | 998  | 18.3 | 323 | 1.6 |
| 2020 | 9 | 30 | 19 | 17.1 | 0   | 0   | 0   | 998  | 17.2 | 329 | 1.6 |

|      |    |    |    |      |     |     |     |      |      |     |     |
|------|----|----|----|------|-----|-----|-----|------|------|-----|-----|
| 2020 | 9  | 30 | 20 | 16.4 | 0   | 0   | 0   | 998  | 16.4 | 336 | 1.5 |
| 2020 | 9  | 30 | 21 | 15.7 | 0   | 0   | 0   | 999  | 15.7 | 341 | 1.3 |
| 2020 | 9  | 30 | 22 | 15.2 | 0   | 0   | 0   | 999  | 15.2 | 345 | 1.2 |
| 2020 | 9  | 30 | 23 | 14.7 | 0   | 0   | 0   | 999  | 14.7 | 354 | 1.1 |
| 2020 | 10 | 1  | 0  | 14.4 | 0   | 0   | 0   | 999  | 14.4 | 11  | 1   |
| 2020 | 10 | 1  | 1  | 14.3 | 0   | 0   | 0   | 999  | 14.3 | 29  | 0.9 |
| 2020 | 10 | 1  | 2  | 14.1 | 0   | 0   | 0   | 999  | 14.1 | 47  | 0.9 |
| 2020 | 10 | 1  | 3  | 13.9 | 0   | 0   | 0   | 999  | 13.9 | 64  | 0.9 |
| 2020 | 10 | 1  | 4  | 13.8 | 0   | 0   | 0   | 1000 | 13.8 | 77  | 0.8 |
| 2020 | 10 | 1  | 5  | 13.5 | 0   | 0   | 0   | 1000 | 13.5 | 90  | 0.9 |
| 2020 | 10 | 1  | 6  | 13.2 | 0   | 0   | 0   | 1001 | 13.2 | 99  | 0.9 |
| 2020 | 10 | 1  | 7  | 14.7 | 42  | 77  | 50  | 1001 | 15   | 106 | 1   |
| 2020 | 10 | 1  | 8  | 15.5 | 126 | 342 | 231 | 1002 | 17.2 | 114 | 1.7 |
| 2020 | 10 | 1  | 9  | 16.1 | 204 | 241 | 321 | 1002 | 19.2 | 137 | 1.7 |
| 2020 | 10 | 1  | 10 | 16.6 | 190 | 637 | 593 | 1002 | 20.8 | 166 | 1.7 |
| 2020 | 10 | 1  | 11 | 16.7 | 196 | 704 | 712 | 1002 | 21.7 | 179 | 1.9 |
| 2020 | 10 | 1  | 12 | 16.9 | 187 | 754 | 776 | 1001 | 22.5 | 183 | 2.1 |
| 2020 | 10 | 1  | 13 | 17.2 | 186 | 749 | 765 | 1001 | 23.1 | 191 | 2.2 |
| 2020 | 10 | 1  | 14 | 17.2 | 174 | 729 | 693 | 1001 | 23.4 | 197 | 2.3 |
| 2020 | 10 | 1  | 15 | 17.1 | 149 | 0   | 149 | 1000 | 23.3 | 183 | 2.2 |
| 2020 | 10 | 1  | 16 | 17.4 | 127 | 589 | 387 | 1000 | 22.7 | 174 | 2   |
| 2020 | 10 | 1  | 17 | 18.1 | 63  | 0   | 63  | 1000 | 21.4 | 177 | 1.5 |
| 2020 | 10 | 1  | 18 | 17.4 | 18  | 46  | 20  | 1000 | 18.9 | 185 | 1   |
| 2020 | 10 | 1  | 19 | 16.9 | 0   | 0   | 0   | 1001 | 18.1 | 196 | 0.9 |
| 2020 | 10 | 1  | 20 | 16.6 | 0   | 0   | 0   | 1002 | 17.6 | 203 | 0.9 |
| 2020 | 10 | 1  | 21 | 16.3 | 0   | 0   | 0   | 1002 | 17.3 | 210 | 0.8 |
| 2020 | 10 | 1  | 22 | 15.9 | 0   | 0   | 0   | 1002 | 17   | 216 | 0.8 |
| 2020 | 10 | 1  | 23 | 15.7 | 0   | 0   | 0   | 1003 | 16.7 | 217 | 0.8 |
| 2020 | 10 | 2  | 0  | 15.4 | 0   | 0   | 0   | 1003 | 16.4 | 216 | 0.7 |
| 2020 | 10 | 2  | 1  | 15.2 | 0   | 0   | 0   | 1003 | 16   | 221 | 0.7 |
| 2020 | 10 | 2  | 2  | 15.1 | 0   | 0   | 0   | 1003 | 15.7 | 216 | 0.7 |
| 2020 | 10 | 2  | 3  | 15   | 0   | 0   | 0   | 1003 | 15.3 | 201 | 0.7 |
| 2020 | 10 | 2  | 4  | 14.7 | 0   | 0   | 0   | 1003 | 14.7 | 189 | 0.8 |
| 2020 | 10 | 2  | 5  | 14.2 | 0   | 0   | 0   | 1003 | 14.2 | 188 | 0.9 |
| 2020 | 10 | 2  | 6  | 14.1 | 0   | 0   | 0   | 1003 | 14.1 | 188 | 0.9 |
| 2020 | 10 | 2  | 7  | 15.6 | 40  | 127 | 53  | 1003 | 16   | 185 | 1.1 |
| 2020 | 10 | 2  | 8  | 16.3 | 103 | 438 | 236 | 1004 | 18.5 | 190 | 1.8 |
| 2020 | 10 | 2  | 9  | 16.6 | 136 | 609 | 430 | 1004 | 20.4 | 211 | 2   |
| 2020 | 10 | 2  | 10 | 16.7 | 154 | 703 | 596 | 1004 | 21.7 | 229 | 1.9 |
| 2020 | 10 | 2  | 11 | 16.7 | 165 | 753 | 714 | 1004 | 22.6 | 243 | 1.9 |
| 2020 | 10 | 2  | 12 | 16.8 | 165 | 781 | 771 | 1003 | 23.4 | 247 | 2   |
| 2020 | 10 | 2  | 13 | 16.9 | 169 | 767 | 759 | 1003 | 23.8 | 248 | 2.1 |
| 2020 | 10 | 2  | 14 | 16.9 | 166 | 731 | 682 | 1002 | 23.9 | 255 | 2.1 |
| 2020 | 10 | 2  | 15 | 16.9 | 265 | 221 | 396 | 1002 | 23.3 | 261 | 1.8 |
| 2020 | 10 | 2  | 16 | 17.2 | 133 | 551 | 373 | 1002 | 22.3 | 268 | 1.3 |
| 2020 | 10 | 2  | 17 | 18.2 | 88  | 245 | 149 | 1003 | 20.8 | 280 | 1   |
| 2020 | 10 | 2  | 18 | 17.2 | 11  | 0   | 11  | 1003 | 19.3 | 282 | 0.9 |
| 2020 | 10 | 2  | 19 | 16.3 | 0   | 0   | 0   | 1003 | 19.3 | 278 | 0.7 |
| 2020 | 10 | 2  | 20 | 15.9 | 0   | 0   | 0   | 1003 | 19.3 | 292 | 0.6 |
| 2020 | 10 | 2  | 21 | 16   | 0   | 0   | 0   | 1004 | 18.5 | 292 | 0.7 |

|      |    |   |    |      |     |     |     |      |      |     |     |
|------|----|---|----|------|-----|-----|-----|------|------|-----|-----|
| 2020 | 10 | 2 | 22 | 16   | 0   | 0   | 0   | 1004 | 18.1 | 282 | 0.8 |
| 2020 | 10 | 2 | 23 | 16.1 | 0   | 0   | 0   | 1004 | 17.7 | 277 | 0.8 |
| 2020 | 10 | 3 | 0  | 16   | 0   | 0   | 0   | 1004 | 17.6 | 274 | 0.7 |
| 2020 | 10 | 3 | 1  | 16   | 0   | 0   | 0   | 1004 | 17.7 | 284 | 0.5 |
| 2020 | 10 | 3 | 2  | 16   | 0   | 0   | 0   | 1003 | 17.8 | 344 | 0.3 |
| 2020 | 10 | 3 | 3  | 15.9 | 0   | 0   | 0   | 1003 | 17.6 | 29  | 0.4 |
| 2020 | 10 | 3 | 4  | 15.8 | 0   | 0   | 0   | 1003 | 17.3 | 39  | 0.5 |
| 2020 | 10 | 3 | 5  | 15.7 | 0   | 0   | 0   | 1004 | 17.1 | 46  | 0.4 |
| 2020 | 10 | 3 | 6  | 15.7 | 0   | 0   | 0   | 1004 | 16.8 | 61  | 0.4 |
| 2020 | 10 | 3 | 7  | 16.3 | 33  | 53  | 38  | 1004 | 17   | 65  | 0.5 |
| 2020 | 10 | 3 | 8  | 16.7 | 112 | 33  | 121 | 1004 | 18   | 66  | 0.9 |
| 2020 | 10 | 3 | 9  | 16.8 | 125 | 625 | 425 | 1004 | 20.5 | 46  | 0.4 |
| 2020 | 10 | 3 | 10 | 16.2 | 140 | 722 | 591 | 1004 | 22.6 | 289 | 0.5 |
| 2020 | 10 | 3 | 11 | 16.6 | 345 | 215 | 501 | 1003 | 23.7 | 280 | 0.9 |
| 2020 | 10 | 3 | 12 | 17.1 | 351 | 327 | 603 | 1003 | 24.4 | 280 | 1.2 |
| 2020 | 10 | 3 | 13 | 17.5 | 172 | 752 | 747 | 1002 | 24.6 | 283 | 1.5 |
| 2020 | 10 | 3 | 14 | 17.8 | 171 | 711 | 670 | 1002 | 24.5 | 286 | 1.8 |
| 2020 | 10 | 3 | 15 | 18   | 132 | 710 | 549 | 1001 | 23.8 | 290 | 1.8 |
| 2020 | 10 | 3 | 16 | 18.5 | 176 | 66  | 205 | 1002 | 22.9 | 298 | 1.5 |
| 2020 | 10 | 3 | 17 | 19.2 | 91  | 175 | 133 | 1002 | 21.5 | 308 | 1.2 |
| 2020 | 10 | 3 | 18 | 18.7 | 16  | 0   | 16  | 1002 | 19.7 | 317 | 1   |
| 2020 | 10 | 3 | 19 | 18.5 | 0   | 0   | 0   | 1003 | 19   | 326 | 1.2 |
| 2020 | 10 | 3 | 20 | 18.2 | 0   | 0   | 0   | 1002 | 18.5 | 349 | 0.8 |
| 2020 | 10 | 3 | 21 | 18   | 0   | 0   | 0   | 1002 | 18.3 | 14  | 0.6 |
| 2020 | 10 | 3 | 22 | 17.8 | 0   | 0   | 0   | 1002 | 18.3 | 15  | 0.4 |
| 2020 | 10 | 3 | 23 | 17.6 | 0   | 0   | 0   | 1002 | 18.3 | 350 | 0.1 |
| 2020 | 10 | 4 | 0  | 17.5 | 0   | 0   | 0   | 1002 | 18.1 | 259 | 0.3 |
| 2020 | 10 | 4 | 1  | 17.3 | 0   | 0   | 0   | 1002 | 17.6 | 277 | 0.6 |
| 2020 | 10 | 4 | 2  | 17.2 | 0   | 0   | 0   | 1002 | 17.4 | 287 | 0.7 |
| 2020 | 10 | 4 | 3  | 17   | 0   | 0   | 0   | 1002 | 17.1 | 297 | 0.8 |
| 2020 | 10 | 4 | 4  | 16.7 | 0   | 0   | 0   | 1001 | 16.7 | 306 | 0.9 |
| 2020 | 10 | 4 | 5  | 16.5 | 0   | 0   | 0   | 1001 | 16.5 | 311 | 0.9 |
| 2020 | 10 | 4 | 6  | 16.3 | 0   | 0   | 0   | 1001 | 16.3 | 319 | 0.9 |
| 2020 | 10 | 4 | 7  | 17.4 | 15  | 0   | 15  | 1001 | 17.6 | 327 | 1   |
| 2020 | 10 | 4 | 8  | 18.1 | 26  | 0   | 26  | 1001 | 19.1 | 325 | 1.5 |
| 2020 | 10 | 4 | 9  | 17.8 | 60  | 0   | 60  | 1001 | 20.2 | 308 | 1.6 |
| 2020 | 10 | 4 | 10 | 17.1 | 66  | 0   | 66  | 1001 | 21.3 | 287 | 1.9 |
| 2020 | 10 | 4 | 11 | 16.8 | 83  | 0   | 83  | 1000 | 22   | 277 | 2.4 |
| 2020 | 10 | 4 | 12 | 17   | 309 | 32  | 333 | 999  | 22.3 | 273 | 2.7 |
| 2020 | 10 | 4 | 13 | 17.2 | 72  | 0   | 72  | 999  | 22.3 | 275 | 3.1 |
| 2020 | 10 | 4 | 14 | 17.2 | 60  | 0   | 60  | 999  | 21.9 | 278 | 3.5 |
| 2020 | 10 | 4 | 15 | 17.3 | 47  | 0   | 47  | 999  | 21.3 | 282 | 3.7 |
| 2020 | 10 | 4 | 16 | 17.5 | 16  | 0   | 16  | 999  | 20.6 | 288 | 3.6 |
| 2020 | 10 | 4 | 17 | 17.8 | 78  | 0   | 78  | 999  | 19.6 | 295 | 2.9 |
| 2020 | 10 | 4 | 18 | 17.7 | 7   | 0   | 7   | 999  | 18.4 | 300 | 2   |
| 2020 | 10 | 4 | 19 | 17.2 | 0   | 0   | 0   | 1000 | 18   | 310 | 2.6 |
| 2020 | 10 | 4 | 20 | 15.9 | 0   | 0   | 0   | 1001 | 17.5 | 328 | 4.3 |
| 2020 | 10 | 4 | 21 | 14.5 | 0   | 0   | 0   | 1002 | 15.8 | 338 | 5   |
| 2020 | 10 | 4 | 22 | 13.2 | 0   | 0   | 0   | 1002 | 14.8 | 344 | 4.5 |
| 2020 | 10 | 4 | 23 | 11.8 | 0   | 0   | 0   | 1003 | 14.1 | 347 | 3.8 |

|      |    |   |    |      |     |     |     |      |      |     |     |
|------|----|---|----|------|-----|-----|-----|------|------|-----|-----|
| 2020 | 10 | 5 | 0  | 10.5 | 0   | 0   | 0   | 1003 | 13   | 349 | 3.5 |
| 2020 | 10 | 5 | 1  | 9.4  | 0   | 0   | 0   | 1003 | 11.6 | 353 | 3.1 |
| 2020 | 10 | 5 | 2  | 8.5  | 0   | 0   | 0   | 1004 | 10.6 | 356 | 3   |
| 2020 | 10 | 5 | 3  | 7.9  | 0   | 0   | 0   | 1004 | 9.7  | 360 | 2.8 |
| 2020 | 10 | 5 | 4  | 7.3  | 0   | 0   | 0   | 1004 | 8.9  | 3   | 2.6 |
| 2020 | 10 | 5 | 5  | 6.5  | 0   | 0   | 0   | 1004 | 8.1  | 7   | 2.4 |
| 2020 | 10 | 5 | 6  | 5.8  | 0   | 0   | 0   | 1005 | 7.4  | 10  | 1.9 |
| 2020 | 10 | 5 | 7  | 5.8  | 35  | 213 | 54  | 1006 | 8.9  | 11  | 2.3 |
| 2020 | 10 | 5 | 8  | 5.9  | 84  | 558 | 248 | 1006 | 11.1 | 5   | 2.7 |
| 2020 | 10 | 5 | 9  | 7.2  | 116 | 699 | 447 | 1006 | 14.2 | 356 | 3.7 |
| 2020 | 10 | 5 | 10 | 8.7  | 137 | 771 | 613 | 1006 | 16.2 | 347 | 4.3 |
| 2020 | 10 | 5 | 11 | 9.7  | 150 | 809 | 730 | 1006 | 17.4 | 339 | 4.6 |
| 2020 | 10 | 5 | 12 | 10.2 | 137 | 860 | 794 | 1005 | 18.1 | 335 | 5   |
| 2020 | 10 | 5 | 13 | 10.4 | 143 | 839 | 777 | 1005 | 18.3 | 333 | 5.1 |
| 2020 | 10 | 5 | 14 | 10.5 | 141 | 807 | 700 | 1004 | 18.2 | 332 | 5.1 |
| 2020 | 10 | 5 | 15 | 10.4 | 126 | 760 | 566 | 1005 | 17.6 | 332 | 5   |
| 2020 | 10 | 5 | 16 | 10.2 | 112 | 638 | 381 | 1005 | 16.7 | 333 | 4.7 |
| 2020 | 10 | 5 | 17 | 10.6 | 82  | 402 | 176 | 1005 | 15.1 | 337 | 3.4 |
| 2020 | 10 | 5 | 18 | 11   | 12  | 17  | 12  | 1006 | 13.5 | 338 | 2.3 |
| 2020 | 10 | 5 | 19 | 10.7 | 0   | 0   | 0   | 1006 | 12.5 | 343 | 2   |
| 2020 | 10 | 5 | 20 | 10.2 | 0   | 0   | 0   | 1006 | 11.9 | 346 | 2   |
| 2020 | 10 | 5 | 21 | 9.7  | 0   | 0   | 0   | 1007 | 11.3 | 348 | 1.9 |
| 2020 | 10 | 5 | 22 | 9.4  | 0   | 0   | 0   | 1007 | 11   | 349 | 1.7 |
| 2020 | 10 | 5 | 23 | 9.3  | 0   | 0   | 0   | 1007 | 10.9 | 352 | 1.6 |
| 2020 | 10 | 6 | 0  | 9.4  | 0   | 0   | 0   | 1007 | 10.9 | 356 | 1.5 |
| 2020 | 10 | 6 | 1  | 9.1  | 0   | 0   | 0   | 1007 | 10.4 | 4   | 1.5 |
| 2020 | 10 | 6 | 2  | 8.7  | 0   | 0   | 0   | 1007 | 9.4  | 8   | 1.6 |
| 2020 | 10 | 6 | 3  | 8.6  | 0   | 0   | 0   | 1007 | 8.8  | 16  | 1.7 |
| 2020 | 10 | 6 | 4  | 8.1  | 0   | 0   | 0   | 1008 | 8.2  | 20  | 1.6 |
| 2020 | 10 | 6 | 5  | 7.4  | 0   | 0   | 0   | 1008 | 7.5  | 23  | 1.5 |
| 2020 | 10 | 6 | 6  | 6.9  | 0   | 0   | 0   | 1009 | 6.9  | 26  | 1.3 |
| 2020 | 10 | 6 | 7  | 7.4  | 35  | 185 | 51  | 1009 | 8.9  | 29  | 1.7 |
| 2020 | 10 | 6 | 8  | 7.8  | 83  | 574 | 250 | 1009 | 11.3 | 23  | 2.4 |
| 2020 | 10 | 6 | 9  | 7.6  | 103 | 749 | 456 | 1010 | 14.2 | 18  | 2.9 |
| 2020 | 10 | 6 | 10 | 7.7  | 116 | 838 | 630 | 1010 | 15.8 | 9   | 3   |
| 2020 | 10 | 6 | 11 | 8.2  | 124 | 877 | 749 | 1009 | 16.9 | 2   | 3.2 |
| 2020 | 10 | 6 | 12 | 8.6  | 121 | 908 | 811 | 1009 | 17.8 | 359 | 3.4 |
| 2020 | 10 | 6 | 13 | 9    | 124 | 893 | 795 | 1008 | 18.3 | 356 | 3.5 |
| 2020 | 10 | 6 | 14 | 9.2  | 124 | 854 | 711 | 1008 | 18.5 | 357 | 3.5 |
| 2020 | 10 | 6 | 15 | 9.4  | 106 | 821 | 577 | 1008 | 18.3 | 359 | 3.3 |
| 2020 | 10 | 6 | 16 | 9.9  | 93  | 715 | 391 | 1008 | 17.5 | 358 | 3   |
| 2020 | 10 | 6 | 17 | 11.4 | 69  | 494 | 182 | 1008 | 15.7 | 359 | 1.9 |
| 2020 | 10 | 6 | 18 | 10.7 | 11  | 31  | 12  | 1009 | 13.2 | 359 | 1.7 |
| 2020 | 10 | 6 | 19 | 10.4 | 0   | 0   | 0   | 1009 | 12.8 | 5   | 1.8 |
| 2020 | 10 | 6 | 20 | 10.1 | 0   | 0   | 0   | 1009 | 12.3 | 16  | 1.8 |
| 2020 | 10 | 6 | 21 | 9.5  | 0   | 0   | 0   | 1010 | 11.4 | 22  | 1.7 |
| 2020 | 10 | 6 | 22 | 9.1  | 0   | 0   | 0   | 1010 | 10.8 | 29  | 1.5 |
| 2020 | 10 | 6 | 23 | 8.7  | 0   | 0   | 0   | 1010 | 10.3 | 37  | 1.4 |
| 2020 | 10 | 7 | 0  | 8.2  | 0   | 0   | 0   | 1011 | 9.8  | 42  | 1.3 |
| 2020 | 10 | 7 | 1  | 7.9  | 0   | 0   | 0   | 1011 | 9.4  | 44  | 1.4 |

|      |    |   |    |      |     |     |     |      |      |    |     |
|------|----|---|----|------|-----|-----|-----|------|------|----|-----|
| 2020 | 10 | 7 | 2  | 7.5  | 0   | 0   | 0   | 1011 | 9.1  | 46 | 1.4 |
| 2020 | 10 | 7 | 3  | 7.1  | 0   | 0   | 0   | 1011 | 8.8  | 46 | 1.5 |
| 2020 | 10 | 7 | 4  | 6.8  | 0   | 0   | 0   | 1011 | 8.5  | 48 | 1.5 |
| 2020 | 10 | 7 | 5  | 6.5  | 0   | 0   | 0   | 1012 | 8.2  | 51 | 1.5 |
| 2020 | 10 | 7 | 6  | 6.2  | 0   | 0   | 0   | 1012 | 7.8  | 52 | 1.4 |
| 2020 | 10 | 7 | 7  | 7.2  | 31  | 216 | 50  | 1012 | 9.6  | 55 | 1.7 |
| 2020 | 10 | 7 | 8  | 8    | 76  | 578 | 242 | 1012 | 12.4 | 59 | 2.6 |
| 2020 | 10 | 7 | 9  | 9.9  | 94  | 757 | 447 | 1012 | 15.2 | 62 | 2.6 |
| 2020 | 10 | 7 | 10 | 10.5 | 106 | 839 | 619 | 1012 | 17.6 | 61 | 2.6 |
| 2020 | 10 | 7 | 11 | 10.9 | 113 | 878 | 736 | 1012 | 19   | 58 | 2.4 |
| 2020 | 10 | 7 | 12 | 11.2 | 114 | 897 | 791 | 1011 | 20   | 59 | 2.3 |
| 2020 | 10 | 7 | 13 | 11.3 | 115 | 884 | 775 | 1010 | 20.6 | 60 | 2.2 |
| 2020 | 10 | 7 | 14 | 11.3 | 316 | 242 | 481 | 1010 | 20.9 | 60 | 2.1 |
| 2020 | 10 | 7 | 15 | 11.4 | 108 | 787 | 556 | 1010 | 20.8 | 58 | 2.1 |
| 2020 | 10 | 7 | 16 | 12.2 | 172 | 159 | 237 | 1010 | 20.2 | 55 | 1.7 |
| 2020 | 10 | 7 | 17 | 13.9 | 62  | 491 | 172 | 1010 | 18.5 | 52 | 1.2 |
| 2020 | 10 | 7 | 18 | 12.4 | 6   | 0   | 6   | 1010 | 15.5 | 48 | 1.1 |
| 2020 | 10 | 7 | 19 | 11.8 | 0   | 0   | 0   | 1011 | 14.4 | 51 | 1.3 |
| 2020 | 10 | 7 | 20 | 11.5 | 0   | 0   | 0   | 1011 | 13.8 | 53 | 1.5 |
| 2020 | 10 | 7 | 21 | 11   | 0   | 0   | 0   | 1011 | 13   | 52 | 1.6 |
| 2020 | 10 | 7 | 22 | 10.6 | 0   | 0   | 0   | 1011 | 12.2 | 48 | 1.6 |
| 2020 | 10 | 7 | 23 | 10.5 | 0   | 0   | 0   | 1011 | 11.7 | 45 | 1.6 |
| 2020 | 10 | 8 | 0  | 10.6 | 0   | 0   | 0   | 1011 | 11.2 | 45 | 1.7 |
| 2020 | 10 | 8 | 1  | 10.8 | 0   | 0   | 0   | 1011 | 10.9 | 44 | 1.8 |
| 2020 | 10 | 8 | 2  | 10.5 | 0   | 0   | 0   | 1011 | 10.5 | 42 | 1.8 |
| 2020 | 10 | 8 | 3  | 10.2 | 0   | 0   | 0   | 1012 | 10.2 | 41 | 1.9 |
| 2020 | 10 | 8 | 4  | 9.9  | 0   | 0   | 0   | 1012 | 9.9  | 42 | 1.9 |
| 2020 | 10 | 8 | 5  | 9.6  | 0   | 0   | 0   | 1012 | 9.6  | 46 | 2   |
| 2020 | 10 | 8 | 6  | 9.2  | 0   | 0   | 0   | 1012 | 9.2  | 50 | 1.9 |
| 2020 | 10 | 8 | 7  | 10.5 | 33  | 206 | 50  | 1012 | 11.1 | 51 | 2.3 |
| 2020 | 10 | 8 | 8  | 11.4 | 79  | 575 | 243 | 1013 | 13.7 | 50 | 3   |
| 2020 | 10 | 8 | 9  | 11.7 | 104 | 737 | 446 | 1013 | 16.3 | 63 | 4.5 |
| 2020 | 10 | 8 | 10 | 11.7 | 118 | 817 | 614 | 1012 | 18   | 64 | 4.7 |
| 2020 | 10 | 8 | 11 | 11.8 | 127 | 856 | 731 | 1012 | 19.1 | 63 | 4.8 |
| 2020 | 10 | 8 | 12 | 12   | 123 | 887 | 789 | 1011 | 19.9 | 64 | 4.9 |
| 2020 | 10 | 8 | 13 | 12.3 | 125 | 874 | 773 | 1011 | 20.5 | 65 | 4.9 |
| 2020 | 10 | 8 | 14 | 12.4 | 124 | 841 | 694 | 1010 | 20.7 | 64 | 4.7 |
| 2020 | 10 | 8 | 15 | 12.2 | 113 | 791 | 559 | 1010 | 20.2 | 60 | 4.7 |
| 2020 | 10 | 8 | 16 | 12.1 | 95  | 694 | 377 | 1010 | 19.1 | 57 | 4.1 |
| 2020 | 10 | 8 | 17 | 12.3 | 65  | 493 | 173 | 1011 | 17.1 | 52 | 2.9 |
| 2020 | 10 | 8 | 18 | 11.2 | 0   | 0   | 0   | 1011 | 14.1 | 51 | 2.3 |
| 2020 | 10 | 8 | 19 | 10.5 | 0   | 0   | 0   | 1011 | 12.9 | 52 | 2.3 |
| 2020 | 10 | 8 | 20 | 10   | 0   | 0   | 0   | 1011 | 11.9 | 52 | 2.1 |
| 2020 | 10 | 8 | 21 | 9.6  | 0   | 0   | 0   | 1012 | 11.2 | 53 | 1.9 |
| 2020 | 10 | 8 | 22 | 9.2  | 0   | 0   | 0   | 1012 | 10.5 | 54 | 1.7 |
| 2020 | 10 | 8 | 23 | 8.9  | 0   | 0   | 0   | 1012 | 9.9  | 54 | 1.6 |
| 2020 | 10 | 9 | 0  | 8.7  | 0   | 0   | 0   | 1011 | 9.4  | 52 | 1.6 |
| 2020 | 10 | 9 | 1  | 8.6  | 0   | 0   | 0   | 1011 | 9.2  | 56 | 1.8 |
| 2020 | 10 | 9 | 2  | 8.6  | 0   | 0   | 0   | 1010 | 9.5  | 62 | 2.2 |
| 2020 | 10 | 9 | 3  | 8.5  | 0   | 0   | 0   | 1010 | 9.3  | 67 | 2.3 |

|      |    |    |    |      |     |     |     |      |      |     |     |
|------|----|----|----|------|-----|-----|-----|------|------|-----|-----|
| 2020 | 10 | 9  | 4  | 8.5  | 0   | 0   | 0   | 1009 | 9    | 70  | 2.2 |
| 2020 | 10 | 9  | 5  | 8.6  | 0   | 0   | 0   | 1009 | 9.1  | 73  | 2.1 |
| 2020 | 10 | 9  | 6  | 8.5  | 0   | 0   | 0   | 1009 | 9    | 70  | 1.7 |
| 2020 | 10 | 9  | 7  | 9.2  | 34  | 154 | 47  | 1010 | 10.6 | 55  | 1.5 |
| 2020 | 10 | 9  | 8  | 10   | 89  | 520 | 235 | 1011 | 13.6 | 35  | 2.3 |
| 2020 | 10 | 9  | 9  | 10.8 | 119 | 689 | 436 | 1011 | 16   | 49  | 3.1 |
| 2020 | 10 | 9  | 10 | 11.5 | 135 | 778 | 604 | 1010 | 17.8 | 56  | 3.6 |
| 2020 | 10 | 9  | 11 | 12.1 | 141 | 833 | 725 | 1009 | 19.3 | 55  | 3.7 |
| 2020 | 10 | 9  | 12 | 12.6 | 302 | 430 | 623 | 1009 | 20.4 | 53  | 3.7 |
| 2020 | 10 | 9  | 13 | 12.9 | 128 | 871 | 770 | 1008 | 21   | 51  | 3.5 |
| 2020 | 10 | 9  | 14 | 13.2 | 122 | 844 | 690 | 1007 | 21.3 | 47  | 3.2 |
| 2020 | 10 | 9  | 15 | 13.5 | 106 | 801 | 553 | 1007 | 21.2 | 50  | 3.1 |
| 2020 | 10 | 9  | 16 | 14.1 | 89  | 702 | 372 | 1006 | 20.5 | 54  | 2.6 |
| 2020 | 10 | 9  | 17 | 15.2 | 62  | 497 | 168 | 1007 | 18.5 | 58  | 1.5 |
| 2020 | 10 | 9  | 18 | 13.2 | 0   | 0   | 0   | 1007 | 15.2 | 57  | 1.2 |
| 2020 | 10 | 9  | 19 | 12.3 | 0   | 0   | 0   | 1007 | 14.1 | 53  | 1.2 |
| 2020 | 10 | 9  | 20 | 11.7 | 0   | 0   | 0   | 1008 | 13.2 | 53  | 1.2 |
| 2020 | 10 | 9  | 21 | 11.1 | 0   | 0   | 0   | 1008 | 12.6 | 53  | 1.2 |
| 2020 | 10 | 9  | 22 | 10.6 | 0   | 0   | 0   | 1007 | 12   | 55  | 1.2 |
| 2020 | 10 | 9  | 23 | 10.3 | 0   | 0   | 0   | 1007 | 11.6 | 57  | 1.1 |
| 2020 | 10 | 10 | 0  | 10.3 | 0   | 0   | 0   | 1007 | 11.4 | 54  | 1.1 |
| 2020 | 10 | 10 | 1  | 10.1 | 0   | 0   | 0   | 1007 | 10.9 | 52  | 1.1 |
| 2020 | 10 | 10 | 2  | 10   | 0   | 0   | 0   | 1007 | 10.5 | 53  | 1.2 |
| 2020 | 10 | 10 | 3  | 9.9  | 0   | 0   | 0   | 1006 | 10   | 56  | 1.2 |
| 2020 | 10 | 10 | 4  | 9.7  | 0   | 0   | 0   | 1006 | 9.7  | 61  | 1.2 |
| 2020 | 10 | 10 | 5  | 9.6  | 0   | 0   | 0   | 1007 | 9.6  | 63  | 1.1 |
| 2020 | 10 | 10 | 6  | 9.9  | 0   | 0   | 0   | 1007 | 9.9  | 64  | 1   |
| 2020 | 10 | 10 | 7  | 10.7 | 31  | 180 | 45  | 1007 | 11.4 | 64  | 1.1 |
| 2020 | 10 | 10 | 8  | 11.5 | 78  | 547 | 230 | 1007 | 14   | 60  | 1.9 |
| 2020 | 10 | 10 | 9  | 12.3 | 102 | 713 | 428 | 1007 | 17   | 60  | 2.1 |
| 2020 | 10 | 10 | 10 | 12.7 | 117 | 798 | 595 | 1006 | 19.1 | 42  | 1.7 |
| 2020 | 10 | 10 | 11 | 13.1 | 124 | 843 | 712 | 1006 | 20.4 | 24  | 1.7 |
| 2020 | 10 | 10 | 12 | 13.4 | 125 | 867 | 769 | 1005 | 21.2 | 29  | 1.9 |
| 2020 | 10 | 10 | 13 | 13.5 | 123 | 862 | 755 | 1005 | 21.7 | 36  | 1.7 |
| 2020 | 10 | 10 | 14 | 13.6 | 117 | 836 | 676 | 1004 | 22   | 40  | 1.5 |
| 2020 | 10 | 10 | 15 | 13.7 | 106 | 783 | 540 | 1004 | 21.9 | 38  | 1.5 |
| 2020 | 10 | 10 | 16 | 14.3 | 90  | 675 | 358 | 1004 | 21.3 | 38  | 1.3 |
| 2020 | 10 | 10 | 17 | 15.7 | 78  | 92  | 97  | 1004 | 19.8 | 43  | 0.9 |
| 2020 | 10 | 10 | 18 | 13.9 | 0   | 0   | 0   | 1004 | 17.2 | 49  | 0.9 |
| 2020 | 10 | 10 | 19 | 13.3 | 0   | 0   | 0   | 1004 | 16.2 | 72  | 1   |
| 2020 | 10 | 10 | 20 | 13   | 0   | 0   | 0   | 1005 | 15.2 | 99  | 1.1 |
| 2020 | 10 | 10 | 21 | 12.9 | 0   | 0   | 0   | 1005 | 14.4 | 116 | 1.2 |
| 2020 | 10 | 10 | 22 | 13   | 0   | 0   | 0   | 1005 | 14.1 | 121 | 1.4 |
| 2020 | 10 | 10 | 23 | 12.6 | 0   | 0   | 0   | 1005 | 13.6 | 118 | 1.6 |
| 2020 | 10 | 11 | 0  | 11.8 | 0   | 0   | 0   | 1005 | 12.8 | 113 | 1.7 |
| 2020 | 10 | 11 | 1  | 11.1 | 0   | 0   | 0   | 1005 | 12   | 107 | 1.6 |
| 2020 | 10 | 11 | 2  | 10.5 | 0   | 0   | 0   | 1005 | 11.2 | 102 | 1.5 |
| 2020 | 10 | 11 | 3  | 10.1 | 0   | 0   | 0   | 1005 | 10.7 | 99  | 1.4 |
| 2020 | 10 | 11 | 4  | 9.8  | 0   | 0   | 0   | 1004 | 10.3 | 97  | 1.4 |
| 2020 | 10 | 11 | 5  | 9.7  | 0   | 0   | 0   | 1005 | 10.1 | 96  | 1.4 |



|      |    |    |    |      |     |     |     |      |      |     |     |
|------|----|----|----|------|-----|-----|-----|------|------|-----|-----|
| 2020 | 10 | 11 | 6  | 9.7  | 0   | 0   | 0   | 1005 | 10.2 | 96  | 1.4 |
| 2020 | 10 | 11 | 7  | 10.5 | 24  | 0   | 24  | 1005 | 11.8 | 98  | 2   |
| 2020 | 10 | 11 | 8  | 11.5 | 81  | 504 | 220 | 1005 | 14.2 | 100 | 2.8 |
| 2020 | 10 | 11 | 9  | 12.3 | 111 | 667 | 413 | 1004 | 17   | 99  | 2.6 |
| 2020 | 10 | 11 | 10 | 13   | 133 | 743 | 575 | 1004 | 19.2 | 84  | 1.7 |
| 2020 | 10 | 11 | 11 | 13.8 | 143 | 789 | 690 | 1004 | 20.5 | 59  | 1.1 |
| 2020 | 10 | 11 | 12 | 14.3 | 149 | 803 | 742 | 1003 | 21.4 | 59  | 0.8 |
| 2020 | 10 | 11 | 13 | 14.5 | 146 | 798 | 727 | 1002 | 22   | 39  | 0.4 |
| 2020 | 10 | 11 | 14 | 14.6 | 145 | 759 | 648 | 1001 | 22.2 | 311 | 0.9 |
| 2020 | 10 | 11 | 15 | 14.7 | 135 | 686 | 512 | 1001 | 22   | 312 | 1.4 |
| 2020 | 10 | 11 | 16 | 15   | 115 | 559 | 335 | 1001 | 21.3 | 318 | 1.4 |
| 2020 | 10 | 11 | 17 | 16   | 76  | 323 | 142 | 1001 | 19.8 | 318 | 1.2 |
| 2020 | 10 | 11 | 18 | 15.7 | 0   | 0   | 0   | 1002 | 17.9 | 323 | 1.2 |
| 2020 | 10 | 11 | 19 | 15.7 | 0   | 0   | 0   | 1002 | 17.1 | 332 | 1.1 |
| 2020 | 10 | 11 | 20 | 15.4 | 0   | 0   | 0   | 1002 | 16.4 | 335 | 1.1 |
| 2020 | 10 | 11 | 21 | 14.7 | 0   | 0   | 0   | 1002 | 15.4 | 337 | 1   |
| 2020 | 10 | 11 | 22 | 14.2 | 0   | 0   | 0   | 1002 | 14.4 | 339 | 1   |
| 2020 | 10 | 11 | 23 | 14   | 0   | 0   | 0   | 1002 | 14.1 | 338 | 0.9 |
| 2020 | 10 | 12 | 0  | 13.8 | 0   | 0   | 0   | 1002 | 14.1 | 339 | 0.9 |
| 2020 | 10 | 12 | 1  | 13.7 | 0   | 0   | 0   | 1002 | 14   | 342 | 0.9 |
| 2020 | 10 | 12 | 2  | 13.7 | 0   | 0   | 0   | 1002 | 13.8 | 338 | 0.9 |
| 2020 | 10 | 12 | 3  | 13.6 | 0   | 0   | 0   | 1002 | 13.6 | 331 | 0.9 |
| 2020 | 10 | 12 | 4  | 13.5 | 0   | 0   | 0   | 1002 | 13.5 | 331 | 0.9 |
| 2020 | 10 | 12 | 5  | 13.4 | 0   | 0   | 0   | 1002 | 13.4 | 338 | 0.9 |
| 2020 | 10 | 12 | 6  | 13.3 | 0   | 0   | 0   | 1003 | 13.3 | 342 | 0.9 |
| 2020 | 10 | 12 | 7  | 14.7 | 13  | 0   | 13  | 1003 | 14.7 | 337 | 0.9 |
| 2020 | 10 | 12 | 8  | 15.6 | 78  | 0   | 78  | 1003 | 17   | 331 | 1.9 |
| 2020 | 10 | 12 | 9  | 15.8 | 164 | 18  | 173 | 1004 | 18.6 | 327 | 2.4 |
| 2020 | 10 | 12 | 10 | 15.7 | 237 | 35  | 258 | 1003 | 19.8 | 324 | 2.9 |
| 2020 | 10 | 12 | 11 | 15.8 | 327 | 197 | 462 | 1003 | 20.6 | 324 | 3.3 |
| 2020 | 10 | 12 | 12 | 15.8 | 121 | 836 | 735 | 1003 | 21.2 | 325 | 3.6 |
| 2020 | 10 | 12 | 13 | 15.5 | 131 | 815 | 721 | 1002 | 21.4 | 326 | 3.9 |
| 2020 | 10 | 12 | 14 | 15.3 | 144 | 748 | 637 | 1002 | 21.3 | 328 | 3.9 |
| 2020 | 10 | 12 | 15 | 15.1 | 146 | 648 | 498 | 1002 | 20.8 | 330 | 3.8 |
| 2020 | 10 | 12 | 16 | 15.2 | 135 | 473 | 318 | 1002 | 19.8 | 331 | 3.5 |
| 2020 | 10 | 12 | 17 | 15.6 | 83  | 230 | 129 | 1002 | 18.1 | 329 | 2.4 |
| 2020 | 10 | 12 | 18 | 15   | 0   | 0   | 0   | 1003 | 15.7 | 327 | 1.7 |
| 2020 | 10 | 12 | 19 | 14.5 | 0   | 0   | 0   | 1004 | 15   | 331 | 2   |
| 2020 | 10 | 12 | 20 | 13.6 | 0   | 0   | 0   | 1004 | 14.4 | 335 | 2   |
| 2020 | 10 | 12 | 21 | 12.8 | 0   | 0   | 0   | 1005 | 13.9 | 336 | 1.9 |
| 2020 | 10 | 12 | 22 | 11.6 | 0   | 0   | 0   | 1005 | 12.8 | 336 | 1.7 |
| 2020 | 10 | 12 | 23 | 10.7 | 0   | 0   | 0   | 1005 | 12   | 337 | 1.7 |
| 2020 | 10 | 13 | 0  | 10.1 | 0   | 0   | 0   | 1005 | 11.5 | 339 | 1.8 |
| 2020 | 10 | 13 | 1  | 9.9  | 0   | 0   | 0   | 1005 | 11.5 | 343 | 1.9 |
| 2020 | 10 | 13 | 2  | 9.5  | 0   | 0   | 0   | 1005 | 11   | 346 | 1.9 |
| 2020 | 10 | 13 | 3  | 9.2  | 0   | 0   | 0   | 1005 | 10.8 | 350 | 1.9 |
| 2020 | 10 | 13 | 4  | 8.9  | 0   | 0   | 0   | 1006 | 10.3 | 353 | 1.7 |
| 2020 | 10 | 13 | 5  | 8.7  | 0   | 0   | 0   | 1006 | 9.9  | 355 | 1.6 |
| 2020 | 10 | 13 | 6  | 8.6  | 0   | 0   | 0   | 1007 | 9.8  | 356 | 1.5 |
| 2020 | 10 | 13 | 7  | 9.3  | 27  | 146 | 37  | 1007 | 11   | 355 | 1.8 |

|      |    |    |    |      |     |     |     |      |      |     |     |
|------|----|----|----|------|-----|-----|-----|------|------|-----|-----|
| 2020 | 10 | 13 | 8  | 9.6  | 73  | 471 | 200 | 1008 | 12.9 | 355 | 2.7 |
| 2020 | 10 | 13 | 9  | 9.5  | 148 | 449 | 348 | 1008 | 15.2 | 350 | 3.8 |
| 2020 | 10 | 13 | 10 | 8.9  | 103 | 828 | 591 | 1008 | 16.5 | 348 | 4.5 |
| 2020 | 10 | 13 | 11 | 8.8  | 108 | 878 | 709 | 1008 | 17.1 | 347 | 4.4 |
| 2020 | 10 | 13 | 12 | 8.4  | 121 | 876 | 760 | 1007 | 17.7 | 346 | 4.4 |
| 2020 | 10 | 13 | 13 | 8    | 316 | 56  | 357 | 1007 | 18   | 344 | 4.4 |
| 2020 | 10 | 13 | 14 | 7.6  | 112 | 0   | 112 | 1007 | 17.8 | 344 | 4.4 |
| 2020 | 10 | 13 | 15 | 7.3  | 221 | 47  | 247 | 1007 | 17.1 | 346 | 4.1 |
| 2020 | 10 | 13 | 16 | 7.9  | 133 | 7   | 136 | 1007 | 16.1 | 352 | 3.3 |
| 2020 | 10 | 13 | 17 | 9.9  | 65  | 270 | 118 | 1008 | 14.3 | 353 | 1.8 |
| 2020 | 10 | 13 | 18 | 9.2  | 0   | 0   | 0   | 1008 | 11.7 | 356 | 1.5 |
| 2020 | 10 | 13 | 19 | 8.5  | 0   | 0   | 0   | 1009 | 10.9 | 3   | 1.6 |
| 2020 | 10 | 13 | 20 | 8    | 0   | 0   | 0   | 1009 | 10.4 | 11  | 1.6 |
| 2020 | 10 | 13 | 21 | 7.1  | 0   | 0   | 0   | 1009 | 9.4  | 17  | 1.5 |
| 2020 | 10 | 13 | 22 | 6.3  | 0   | 0   | 0   | 1009 | 8.6  | 19  | 1.4 |
| 2020 | 10 | 13 | 23 | 5.7  | 0   | 0   | 0   | 1009 | 8.1  | 20  | 1.4 |
| 2020 | 10 | 14 | 0  | 5.4  | 0   | 0   | 0   | 1009 | 7.7  | 23  | 1.4 |
| 2020 | 10 | 14 | 1  | 5.3  | 0   | 0   | 0   | 1010 | 7.6  | 24  | 1.4 |
| 2020 | 10 | 14 | 2  | 5.5  | 0   | 0   | 0   | 1010 | 7.8  | 23  | 1.5 |
| 2020 | 10 | 14 | 3  | 5.3  | 0   | 0   | 0   | 1010 | 7.5  | 21  | 1.5 |
| 2020 | 10 | 14 | 4  | 5.2  | 0   | 0   | 0   | 1011 | 7.3  | 21  | 1.5 |
| 2020 | 10 | 14 | 5  | 5.1  | 0   | 0   | 0   | 1011 | 7.4  | 21  | 1.5 |
| 2020 | 10 | 14 | 6  | 5.2  | 0   | 0   | 0   | 1012 | 7.8  | 25  | 1.5 |
| 2020 | 10 | 14 | 7  | 6.5  | 24  | 95  | 30  | 1012 | 9.3  | 31  | 1.4 |
| 2020 | 10 | 14 | 8  | 6.9  | 57  | 0   | 57  | 1012 | 12.7 | 35  | 2.1 |
| 2020 | 10 | 14 | 9  | 8.2  | 187 | 94  | 228 | 1013 | 14.5 | 24  | 2   |
| 2020 | 10 | 14 | 10 | 10.1 | 252 | 283 | 418 | 1013 | 16.9 | 7   | 2.9 |
| 2020 | 10 | 14 | 11 | 10.8 | 219 | 10  | 226 | 1013 | 18.1 | 6   | 3.4 |
| 2020 | 10 | 14 | 12 | 10.9 | 158 | 1   | 159 | 1012 | 19   | 4   | 3.5 |
| 2020 | 10 | 14 | 13 | 10.5 | 302 | 44  | 333 | 1011 | 19.3 | 357 | 3.5 |
| 2020 | 10 | 14 | 14 | 10.2 | 301 | 112 | 374 | 1011 | 19.1 | 351 | 3.4 |
| 2020 | 10 | 14 | 15 | 10   | 132 | 688 | 500 | 1011 | 18.6 | 347 | 3.3 |
| 2020 | 10 | 14 | 16 | 10.2 | 116 | 543 | 321 | 1011 | 17.5 | 344 | 2.9 |
| 2020 | 10 | 14 | 17 | 11.2 | 71  | 303 | 129 | 1011 | 15.2 | 340 | 1.9 |
| 2020 | 10 | 14 | 18 | 9.9  | 0   | 0   | 0   | 1012 | 12.3 | 342 | 1.8 |
| 2020 | 10 | 14 | 19 | 8.8  | 0   | 0   | 0   | 1012 | 11.4 | 350 | 2   |
| 2020 | 10 | 14 | 20 | 7.9  | 0   | 0   | 0   | 1012 | 10.5 | 356 | 2.1 |
| 2020 | 10 | 14 | 21 | 7.2  | 0   | 0   | 0   | 1012 | 9.7  | 2   | 2.1 |
| 2020 | 10 | 14 | 22 | 6.6  | 0   | 0   | 0   | 1012 | 9    | 6   | 2.1 |
| 2020 | 10 | 14 | 23 | 6    | 0   | 0   | 0   | 1012 | 8.4  | 9   | 2.1 |
| 2020 | 10 | 15 | 0  | 5.4  | 0   | 0   | 0   | 1012 | 7.9  | 11  | 2.2 |
| 2020 | 10 | 15 | 1  | 4.9  | 0   | 0   | 0   | 1012 | 7.6  | 14  | 2.3 |
| 2020 | 10 | 15 | 2  | 4.3  | 0   | 0   | 0   | 1012 | 7.1  | 15  | 2.2 |
| 2020 | 10 | 15 | 3  | 3.7  | 0   | 0   | 0   | 1013 | 6.6  | 16  | 2.2 |
| 2020 | 10 | 15 | 4  | 3    | 0   | 0   | 0   | 1013 | 6.1  | 16  | 2.2 |
| 2020 | 10 | 15 | 5  | 2.4  | 0   | 0   | 0   | 1013 | 5.5  | 17  | 2.2 |
| 2020 | 10 | 15 | 6  | 1.9  | 0   | 0   | 0   | 1013 | 4.9  | 19  | 2   |
| 2020 | 10 | 15 | 7  | 2    | 10  | 0   | 10  | 1013 | 6    | 21  | 2.3 |
| 2020 | 10 | 15 | 8  | 1.7  | 62  | 0   | 62  | 1013 | 8.3  | 18  | 3   |
| 2020 | 10 | 15 | 9  | 1.4  | 107 | 689 | 410 | 1013 | 10.9 | 14  | 3.5 |

|      |    |    |    |      |     |     |     |      |      |     |     |
|------|----|----|----|------|-----|-----|-----|------|------|-----|-----|
| 2020 | 10 | 15 | 10 | 1.8  | 121 | 789 | 579 | 1013 | 13.1 | 14  | 3.5 |
| 2020 | 10 | 15 | 11 | 3    | 127 | 837 | 693 | 1012 | 14.9 | 18  | 3.1 |
| 2020 | 10 | 15 | 12 | 3.8  | 120 | 878 | 753 | 1012 | 16.6 | 16  | 3   |
| 2020 | 10 | 15 | 13 | 4.4  | 116 | 878 | 740 | 1011 | 17.6 | 14  | 3   |
| 2020 | 10 | 15 | 14 | 5.1  | 285 | 67  | 328 | 1011 | 17.9 | 8   | 3   |
| 2020 | 10 | 15 | 15 | 5.9  | 233 | 207 | 343 | 1011 | 17.7 | 5   | 2.9 |
| 2020 | 10 | 15 | 16 | 7.2  | 151 | 188 | 221 | 1011 | 16.7 | 3   | 2.4 |
| 2020 | 10 | 15 | 17 | 9.3  | 68  | 128 | 91  | 1011 | 13.9 | 359 | 1.7 |
| 2020 | 10 | 15 | 18 | 7.8  | 0   | 0   | 0   | 1011 | 10.9 | 3   | 1.6 |
| 2020 | 10 | 15 | 19 | 6.9  | 0   | 0   | 0   | 1011 | 9.8  | 13  | 1.6 |
| 2020 | 10 | 15 | 20 | 6.3  | 0   | 0   | 0   | 1012 | 9.1  | 22  | 1.5 |
| 2020 | 10 | 15 | 21 | 6.1  | 0   | 0   | 0   | 1012 | 8.9  | 29  | 1.4 |
| 2020 | 10 | 15 | 22 | 5.6  | 0   | 0   | 0   | 1012 | 8.4  | 36  | 1.4 |
| 2020 | 10 | 15 | 23 | 5.3  | 0   | 0   | 0   | 1012 | 8.1  | 42  | 1.3 |
| 2020 | 10 | 16 | 0  | 5.1  | 0   | 0   | 0   | 1011 | 7.9  | 47  | 1.3 |
| 2020 | 10 | 16 | 1  | 5    | 0   | 0   | 0   | 1011 | 7.8  | 51  | 1.4 |
| 2020 | 10 | 16 | 2  | 4.8  | 0   | 0   | 0   | 1011 | 7.5  | 53  | 1.4 |
| 2020 | 10 | 16 | 3  | 4.7  | 0   | 0   | 0   | 1011 | 7.3  | 53  | 1.4 |
| 2020 | 10 | 16 | 4  | 4.7  | 0   | 0   | 0   | 1011 | 7.1  | 55  | 1.4 |
| 2020 | 10 | 16 | 5  | 4.8  | 0   | 0   | 0   | 1011 | 6.8  | 58  | 1.4 |
| 2020 | 10 | 16 | 6  | 4.8  | 0   | 0   | 0   | 1011 | 6.6  | 63  | 1.3 |
| 2020 | 10 | 16 | 7  | 6.2  | 9   | 0   | 9   | 1011 | 8    | 71  | 1.3 |
| 2020 | 10 | 16 | 8  | 7.6  | 60  | 0   | 60  | 1011 | 11.7 | 79  | 2.2 |
| 2020 | 10 | 16 | 9  | 8.8  | 180 | 71  | 211 | 1011 | 13.7 | 72  | 1.8 |
| 2020 | 10 | 16 | 10 | 8.6  | 252 | 74  | 295 | 1011 | 16.1 | 69  | 1.8 |
| 2020 | 10 | 16 | 11 | 7.9  | 268 | 32  | 290 | 1011 | 17.5 | 70  | 1.4 |
| 2020 | 10 | 16 | 12 | 7.3  | 289 | 33  | 313 | 1010 | 18.3 | 76  | 1   |
| 2020 | 10 | 16 | 13 | 7.1  | 299 | 45  | 331 | 1009 | 18.7 | 54  | 0.6 |
| 2020 | 10 | 16 | 14 | 7.5  | 271 | 49  | 302 | 1009 | 18.8 | 0   | 0.9 |
| 2020 | 10 | 16 | 15 | 8.4  | 180 | 10  | 186 | 1009 | 18.2 | 347 | 1.2 |
| 2020 | 10 | 16 | 16 | 8.8  | 106 | 0   | 106 | 1009 | 17.2 | 347 | 1.2 |
| 2020 | 10 | 16 | 17 | 10.7 | 26  | 0   | 26  | 1009 | 15.5 | 354 | 0.8 |
| 2020 | 10 | 16 | 18 | 8.8  | 0   | 0   | 0   | 1009 | 14.4 | 14  | 0.8 |
| 2020 | 10 | 16 | 19 | 8.1  | 0   | 0   | 0   | 1009 | 14.2 | 42  | 0.7 |
| 2020 | 10 | 16 | 20 | 7.3  | 0   | 0   | 0   | 1010 | 14.2 | 72  | 0.7 |
| 2020 | 10 | 16 | 21 | 6.8  | 0   | 0   | 0   | 1010 | 14   | 93  | 0.5 |
| 2020 | 10 | 16 | 22 | 6.5  | 0   | 0   | 0   | 1010 | 13.9 | 103 | 0.2 |
| 2020 | 10 | 16 | 23 | 6.2  | 0   | 0   | 0   | 1009 | 13.3 | 327 | 0.3 |
| 2020 | 10 | 17 | 0  | 6.5  | 0   | 0   | 0   | 1009 | 12.1 | 332 | 0.7 |
| 2020 | 10 | 17 | 1  | 6    | 0   | 0   | 0   | 1010 | 10.6 | 343 | 1   |
| 2020 | 10 | 17 | 2  | 5.7  | 0   | 0   | 0   | 1010 | 9.4  | 354 | 1.1 |
| 2020 | 10 | 17 | 3  | 5.5  | 0   | 0   | 0   | 1010 | 8.4  | 6   | 1.2 |
| 2020 | 10 | 17 | 4  | 5.3  | 0   | 0   | 0   | 1010 | 7.8  | 17  | 1.2 |
| 2020 | 10 | 17 | 5  | 5    | 0   | 0   | 0   | 1010 | 7.5  | 26  | 1.2 |
| 2020 | 10 | 17 | 6  | 4.7  | 0   | 0   | 0   | 1010 | 7.4  | 33  | 1.2 |
| 2020 | 10 | 17 | 7  | 5.9  | 12  | 0   | 12  | 1010 | 8.4  | 35  | 1   |
| 2020 | 10 | 17 | 8  | 6.7  | 106 | 329 | 190 | 1011 | 11.7 | 33  | 1.7 |
| 2020 | 10 | 17 | 9  | 7.3  | 157 | 507 | 376 | 1011 | 13.7 | 26  | 2.1 |
| 2020 | 10 | 17 | 10 | 9.3  | 188 | 612 | 539 | 1011 | 15.9 | 15  | 2.4 |
| 2020 | 10 | 17 | 11 | 10.1 | 202 | 677 | 655 | 1011 | 17   | 6   | 2.2 |

|      |    |    |    |      |     |     |     |      |      |     |     |
|------|----|----|----|------|-----|-----|-----|------|------|-----|-----|
| 2020 | 10 | 17 | 12 | 10.7 | 169 | 773 | 719 | 1010 | 17.7 | 354 | 2.2 |
| 2020 | 10 | 17 | 13 | 11.2 | 171 | 761 | 704 | 1009 | 18.1 | 342 | 2.3 |
| 2020 | 10 | 17 | 14 | 11.6 | 166 | 724 | 627 | 1009 | 18.1 | 337 | 2.5 |
| 2020 | 10 | 17 | 15 | 11.7 | 228 | 205 | 335 | 1009 | 17.9 | 334 | 2.6 |
| 2020 | 10 | 17 | 16 | 11.8 | 128 | 500 | 311 | 1009 | 17.1 | 336 | 2.4 |
| 2020 | 10 | 17 | 17 | 12.7 | 72  | 275 | 121 | 1009 | 15.1 | 337 | 1.3 |
| 2020 | 10 | 17 | 18 | 11.2 | 0   | 0   | 0   | 1010 | 12.6 | 332 | 1.2 |
| 2020 | 10 | 17 | 19 | 10.5 | 0   | 0   | 0   | 1010 | 11.7 | 336 | 1.3 |
| 2020 | 10 | 17 | 20 | 10.1 | 0   | 0   | 0   | 1010 | 11.2 | 345 | 1.3 |
| 2020 | 10 | 17 | 21 | 9.7  | 0   | 0   | 0   | 1010 | 10.2 | 350 | 1.2 |
| 2020 | 10 | 17 | 22 | 9.5  | 0   | 0   | 0   | 1010 | 9.6  | 356 | 1.2 |
| 2020 | 10 | 17 | 23 | 9.3  | 0   | 0   | 0   | 1010 | 9.3  | 7   | 1.2 |
| 2020 | 10 | 18 | 0  | 9.1  | 0   | 0   | 0   | 1010 | 9.1  | 12  | 1.2 |
| 2020 | 10 | 18 | 1  | 8.8  | 0   | 0   | 0   | 1010 | 8.8  | 15  | 1.2 |
| 2020 | 10 | 18 | 2  | 7.9  | 0   | 0   | 0   | 1011 | 7.9  | 16  | 1.2 |
| 2020 | 10 | 18 | 3  | 7.5  | 0   | 0   | 0   | 1011 | 7.5  | 18  | 1.3 |
| 2020 | 10 | 18 | 4  | 7    | 0   | 0   | 0   | 1011 | 7    | 22  | 1.4 |
| 2020 | 10 | 18 | 5  | 6.5  | 0   | 0   | 0   | 1011 | 6.6  | 26  | 1.3 |
| 2020 | 10 | 18 | 6  | 5.9  | 0   | 0   | 0   | 1011 | 6.3  | 31  | 1.3 |
| 2020 | 10 | 18 | 7  | 6.4  | 23  | 135 | 30  | 1011 | 7.6  | 37  | 1.2 |
| 2020 | 10 | 18 | 8  | 7.3  | 77  | 534 | 211 | 1011 | 11.3 | 41  | 2.2 |
| 2020 | 10 | 18 | 9  | 8.2  | 103 | 717 | 410 | 1012 | 13.9 | 34  | 2.1 |
| 2020 | 10 | 18 | 10 | 8.5  | 118 | 810 | 579 | 1011 | 16.5 | 18  | 1.9 |
| 2020 | 10 | 18 | 11 | 8.4  | 127 | 858 | 697 | 1011 | 17.7 | 1   | 1.8 |
| 2020 | 10 | 18 | 12 | 8.1  | 293 | 405 | 580 | 1010 | 18.5 | 350 | 1.9 |
| 2020 | 10 | 18 | 13 | 7.8  | 234 | 541 | 610 | 1010 | 18.9 | 346 | 2.1 |
| 2020 | 10 | 18 | 14 | 7.7  | 117 | 857 | 658 | 1009 | 18.9 | 346 | 2.3 |
| 2020 | 10 | 18 | 15 | 8    | 105 | 802 | 518 | 1009 | 18.5 | 346 | 2.3 |
| 2020 | 10 | 18 | 16 | 8.8  | 143 | 214 | 220 | 1009 | 17.5 | 348 | 1.9 |
| 2020 | 10 | 18 | 17 | 10.6 | 56  | 274 | 103 | 1010 | 14.8 | 347 | 1.3 |
| 2020 | 10 | 18 | 18 | 9.1  | 0   | 0   | 0   | 1010 | 12.2 | 351 | 1.4 |
| 2020 | 10 | 18 | 19 | 8.7  | 0   | 0   | 0   | 1010 | 11.4 | 359 | 1.5 |
| 2020 | 10 | 18 | 20 | 8.5  | 0   | 0   | 0   | 1011 | 10.9 | 7   | 1.6 |
| 2020 | 10 | 18 | 21 | 8.2  | 0   | 0   | 0   | 1011 | 10.5 | 15  | 1.5 |
| 2020 | 10 | 18 | 22 | 7.9  | 0   | 0   | 0   | 1011 | 10   | 21  | 1.5 |
| 2020 | 10 | 18 | 23 | 7.6  | 0   | 0   | 0   | 1011 | 9.6  | 24  | 1.4 |
| 2020 | 10 | 19 | 0  | 7.4  | 0   | 0   | 0   | 1011 | 9.2  | 25  | 1.4 |
| 2020 | 10 | 19 | 1  | 7    | 0   | 0   | 0   | 1011 | 8.7  | 25  | 1.4 |
| 2020 | 10 | 19 | 2  | 6.7  | 0   | 0   | 0   | 1011 | 8.3  | 24  | 1.4 |
| 2020 | 10 | 19 | 3  | 6.5  | 0   | 0   | 0   | 1011 | 8    | 23  | 1.5 |
| 2020 | 10 | 19 | 4  | 6    | 0   | 0   | 0   | 1011 | 7.4  | 21  | 1.5 |
| 2020 | 10 | 19 | 5  | 5.4  | 0   | 0   | 0   | 1011 | 6.4  | 21  | 1.5 |
| 2020 | 10 | 19 | 6  | 5.3  | 0   | 0   | 0   | 1012 | 5.8  | 26  | 1.5 |
| 2020 | 10 | 19 | 7  | 6.1  | 19  | 0   | 19  | 1012 | 7.5  | 35  | 1.5 |
| 2020 | 10 | 19 | 8  | 7.2  | 87  | 264 | 153 | 1012 | 10.6 | 44  | 2.5 |
| 2020 | 10 | 19 | 9  | 8.6  | 156 | 359 | 308 | 1012 | 12.9 | 49  | 2.3 |
| 2020 | 10 | 19 | 10 | 8.5  | 121 | 798 | 571 | 1012 | 16   | 58  | 2.6 |
| 2020 | 10 | 19 | 11 | 8.1  | 132 | 840 | 687 | 1012 | 17.4 | 67  | 2.2 |
| 2020 | 10 | 19 | 12 | 8.2  | 300 | 376 | 564 | 1011 | 18.1 | 74  | 1.7 |
| 2020 | 10 | 19 | 13 | 8.4  | 135 | 850 | 723 | 1011 | 18.7 | 70  | 1.1 |

|      |    |    |    |      |     |     |     |      |      |     |     |
|------|----|----|----|------|-----|-----|-----|------|------|-----|-----|
| 2020 | 10 | 19 | 14 | 8.4  | 238 | 446 | 518 | 1010 | 19.1 | 42  | 0.9 |
| 2020 | 10 | 19 | 15 | 8.8  | 121 | 732 | 496 | 1010 | 19   | 27  | 1.2 |
| 2020 | 10 | 19 | 16 | 10.1 | 102 | 593 | 312 | 1010 | 18.4 | 22  | 1   |
| 2020 | 10 | 19 | 17 | 10.8 | 60  | 320 | 114 | 1011 | 16.4 | 18  | 0.9 |
| 2020 | 10 | 19 | 18 | 8.8  | 0   | 0   | 0   | 1011 | 14.2 | 14  | 1.1 |
| 2020 | 10 | 19 | 19 | 8.8  | 0   | 0   | 0   | 1012 | 13   | 18  | 1.2 |
| 2020 | 10 | 19 | 20 | 8.3  | 0   | 0   | 0   | 1012 | 12   | 26  | 1.2 |
| 2020 | 10 | 19 | 21 | 7.6  | 0   | 0   | 0   | 1012 | 11.1 | 35  | 1.2 |
| 2020 | 10 | 19 | 22 | 7.1  | 0   | 0   | 0   | 1013 | 10.4 | 41  | 1.3 |
| 2020 | 10 | 19 | 23 | 6.7  | 0   | 0   | 0   | 1013 | 9.8  | 47  | 1.3 |
| 2020 | 10 | 20 | 0  | 6.3  | 0   | 0   | 0   | 1013 | 9.3  | 52  | 1.3 |
| 2020 | 10 | 20 | 1  | 6    | 0   | 0   | 0   | 1013 | 8.8  | 58  | 1.3 |
| 2020 | 10 | 20 | 2  | 5.7  | 0   | 0   | 0   | 1013 | 8.4  | 63  | 1.3 |
| 2020 | 10 | 20 | 3  | 5.3  | 0   | 0   | 0   | 1013 | 8.1  | 68  | 1.3 |
| 2020 | 10 | 20 | 4  | 5.1  | 0   | 0   | 0   | 1013 | 7.7  | 71  | 1.4 |
| 2020 | 10 | 20 | 5  | 5    | 0   | 0   | 0   | 1013 | 7.4  | 72  | 1.4 |
| 2020 | 10 | 20 | 6  | 4.9  | 0   | 0   | 0   | 1013 | 7.1  | 71  | 1.4 |
| 2020 | 10 | 20 | 7  | 5.9  | 20  | 141 | 27  | 1014 | 8    | 72  | 1.3 |
| 2020 | 10 | 20 | 8  | 8.2  | 67  | 572 | 208 | 1014 | 12.3 | 74  | 2   |
| 2020 | 10 | 20 | 9  | 9    | 92  | 752 | 408 | 1014 | 14.5 | 76  | 2.2 |
| 2020 | 10 | 20 | 10 | 9.4  | 106 | 841 | 577 | 1014 | 17.4 | 77  | 2.3 |
| 2020 | 10 | 20 | 11 | 9.3  | 114 | 879 | 691 | 1014 | 18.7 | 80  | 2.2 |
| 2020 | 10 | 20 | 12 | 9.2  | 120 | 891 | 743 | 1013 | 19.6 | 85  | 1.9 |
| 2020 | 10 | 20 | 13 | 9.2  | 121 | 878 | 724 | 1013 | 20.1 | 89  | 1.4 |
| 2020 | 10 | 20 | 14 | 9.2  | 117 | 841 | 640 | 1012 | 20.3 | 88  | 1.2 |
| 2020 | 10 | 20 | 15 | 9.3  | 107 | 775 | 500 | 1012 | 20   | 90  | 1.2 |
| 2020 | 10 | 20 | 16 | 10.4 | 88  | 649 | 315 | 1011 | 19.3 | 97  | 1   |
| 2020 | 10 | 20 | 17 | 11.3 | 53  | 398 | 118 | 1011 | 17.1 | 105 | 0.9 |
| 2020 | 10 | 20 | 18 | 9.3  | 0   | 0   | 0   | 1011 | 14.3 | 111 | 1.1 |
| 2020 | 10 | 20 | 19 | 9.1  | 0   | 0   | 0   | 1011 | 13   | 120 | 1.2 |
| 2020 | 10 | 20 | 20 | 9    | 0   | 0   | 0   | 1011 | 12.3 | 124 | 1.2 |
| 2020 | 10 | 20 | 21 | 9.1  | 0   | 0   | 0   | 1011 | 11.8 | 127 | 1.2 |
| 2020 | 10 | 20 | 22 | 9.4  | 0   | 0   | 0   | 1011 | 11.3 | 123 | 1.2 |
| 2020 | 10 | 20 | 23 | 9.8  | 0   | 0   | 0   | 1011 | 11.5 | 126 | 1.2 |
| 2020 | 10 | 21 | 0  | 10.1 | 0   | 0   | 0   | 1011 | 11   | 122 | 1.2 |
| 2020 | 10 | 21 | 1  | 10.3 | 0   | 0   | 0   | 1010 | 10.7 | 113 | 1.1 |
| 2020 | 10 | 21 | 2  | 10.2 | 0   | 0   | 0   | 1010 | 10.2 | 106 | 1.2 |
| 2020 | 10 | 21 | 3  | 9.7  | 0   | 0   | 0   | 1009 | 9.7  | 100 | 1.3 |
| 2020 | 10 | 21 | 4  | 9.4  | 0   | 0   | 0   | 1009 | 9.4  | 98  | 1.3 |
| 2020 | 10 | 21 | 5  | 9.2  | 0   | 0   | 0   | 1008 | 9.2  | 96  | 1.3 |
| 2020 | 10 | 21 | 6  | 8.8  | 0   | 0   | 0   | 1008 | 8.8  | 96  | 1.3 |
| 2020 | 10 | 21 | 7  | 9.8  | 14  | 0   | 14  | 1008 | 10   | 98  | 1.3 |
| 2020 | 10 | 21 | 8  | 10.8 | 92  | 57  | 105 | 1008 | 12.6 | 96  | 2.2 |
| 2020 | 10 | 21 | 9  | 11.6 | 176 | 157 | 242 | 1008 | 14.2 | 94  | 2.3 |
| 2020 | 10 | 21 | 10 | 12.6 | 195 | 13  | 203 | 1008 | 16.7 | 112 | 2.1 |
| 2020 | 10 | 21 | 11 | 13.3 | 253 | 27  | 271 | 1007 | 18.3 | 137 | 1.8 |
| 2020 | 10 | 21 | 12 | 13.6 | 150 | 0   | 150 | 1006 | 18.9 | 165 | 1.1 |
| 2020 | 10 | 21 | 13 | 13.7 | 61  | 0   | 61  | 1006 | 18.8 | 224 | 0.6 |
| 2020 | 10 | 21 | 14 | 14.2 | 37  | 0   | 37  | 1005 | 18.1 | 321 | 0.5 |
| 2020 | 10 | 21 | 15 | 14.8 | 25  | 0   | 25  | 1004 | 17.3 | 360 | 0.6 |

|      |    |    |    |      |     |     |     |      |      |     |     |
|------|----|----|----|------|-----|-----|-----|------|------|-----|-----|
| 2020 | 10 | 21 | 16 | 14.6 | 14  | 0   | 14  | 1004 | 16.6 | 357 | 0.7 |
| 2020 | 10 | 21 | 17 | 14.5 | 21  | 0   | 21  | 1005 | 15.5 | 355 | 0.5 |
| 2020 | 10 | 21 | 18 | 13.8 | 0   | 0   | 0   | 1005 | 14.7 | 4   | 0.6 |
| 2020 | 10 | 21 | 19 | 13.4 | 0   | 0   | 0   | 1005 | 14.2 | 27  | 0.5 |
| 2020 | 10 | 21 | 20 | 13   | 0   | 0   | 0   | 1005 | 13.6 | 57  | 0.6 |
| 2020 | 10 | 21 | 21 | 12.6 | 0   | 0   | 0   | 1005 | 13   | 74  | 0.7 |
| 2020 | 10 | 21 | 22 | 12.2 | 0   | 0   | 0   | 1004 | 12.5 | 80  | 0.7 |
| 2020 | 10 | 21 | 23 | 12   | 0   | 0   | 0   | 1004 | 12.4 | 72  | 0.6 |
| 2020 | 10 | 22 | 0  | 11.8 | 0   | 0   | 0   | 1003 | 12.4 | 28  | 0.5 |
| 2020 | 10 | 22 | 1  | 11.1 | 0   | 0   | 0   | 1003 | 11.4 | 355 | 0.8 |
| 2020 | 10 | 22 | 2  | 10.5 | 0   | 0   | 0   | 1003 | 10.7 | 356 | 1   |
| 2020 | 10 | 22 | 3  | 10   | 0   | 0   | 0   | 1003 | 10.1 | 355 | 1.1 |
| 2020 | 10 | 22 | 4  | 9.4  | 0   | 0   | 0   | 1002 | 9.5  | 354 | 1.2 |
| 2020 | 10 | 22 | 5  | 9.5  | 0   | 0   | 0   | 1002 | 9.6  | 354 | 1.2 |
| 2020 | 10 | 22 | 6  | 9.5  | 0   | 0   | 0   | 1002 | 9.7  | 353 | 1.1 |
| 2020 | 10 | 22 | 7  | 10   | 14  | 0   | 14  | 1002 | 10.3 | 356 | 1.1 |
| 2020 | 10 | 22 | 8  | 11.6 | 91  | 65  | 106 | 1002 | 12   | 359 | 1.5 |
| 2020 | 10 | 22 | 9  | 12.3 | 144 | 8   | 147 | 1002 | 12.9 | 354 | 1.8 |
| 2020 | 10 | 22 | 10 | 13.1 | 214 | 28  | 229 | 1002 | 14.2 | 336 | 2.1 |
| 2020 | 10 | 22 | 11 | 13.6 | 304 | 131 | 388 | 1001 | 15.4 | 326 | 2.4 |
| 2020 | 10 | 22 | 12 | 14.1 | 293 | 378 | 554 | 1001 | 16.5 | 314 | 2.5 |
| 2020 | 10 | 22 | 13 | 14.3 | 278 | 36  | 302 | 1000 | 17.7 | 308 | 3   |
| 2020 | 10 | 22 | 14 | 14.1 | 233 | 24  | 248 | 1000 | 18.1 | 312 | 3.7 |
| 2020 | 10 | 22 | 15 | 13.5 | 214 | 81  | 254 | 1000 | 17.4 | 319 | 4.3 |
| 2020 | 10 | 22 | 16 | 12.6 | 134 | 53  | 152 | 1000 | 15.9 | 325 | 4.3 |
| 2020 | 10 | 22 | 17 | 11.4 | 55  | 53  | 64  | 1000 | 14   | 329 | 3.7 |
| 2020 | 10 | 22 | 18 | 10.3 | 0   | 0   | 0   | 1001 | 12.4 | 330 | 3.6 |
| 2020 | 10 | 22 | 19 | 9.4  | 0   | 0   | 0   | 1001 | 11.6 | 332 | 3.8 |
| 2020 | 10 | 22 | 20 | 8.2  | 0   | 0   | 0   | 1002 | 10.2 | 334 | 3.2 |
| 2020 | 10 | 22 | 21 | 7.1  | 0   | 0   | 0   | 1002 | 9.3  | 336 | 3.1 |
| 2020 | 10 | 22 | 22 | 6.5  | 0   | 0   | 0   | 1002 | 9    | 337 | 3.5 |
| 2020 | 10 | 22 | 23 | 6.1  | 0   | 0   | 0   | 1002 | 8.9  | 337 | 3.8 |
| 2020 | 10 | 23 | 0  | 5.8  | 0   | 0   | 0   | 1002 | 8.7  | 337 | 3.8 |
| 2020 | 10 | 23 | 1  | 5.6  | 0   | 0   | 0   | 1002 | 8.8  | 336 | 4   |
| 2020 | 10 | 23 | 2  | 5.5  | 0   | 0   | 0   | 1002 | 8.9  | 334 | 4   |
| 2020 | 10 | 23 | 3  | 5.5  | 0   | 0   | 0   | 1002 | 9    | 332 | 4.3 |
| 2020 | 10 | 23 | 4  | 5.5  | 0   | 0   | 0   | 1002 | 9.2  | 332 | 4.6 |
| 2020 | 10 | 23 | 5  | 5.3  | 0   | 0   | 0   | 1002 | 8.8  | 334 | 4.5 |
| 2020 | 10 | 23 | 6  | 5.1  | 0   | 0   | 0   | 1002 | 8    | 338 | 4.1 |
| 2020 | 10 | 23 | 7  | 5.1  | 17  | 133 | 22  | 1003 | 7.9  | 340 | 4.2 |
| 2020 | 10 | 23 | 8  | 5.6  | 85  | 20  | 90  | 1003 | 9.6  | 341 | 4.8 |
| 2020 | 10 | 23 | 9  | 5.2  | 170 | 208 | 255 | 1003 | 11.3 | 339 | 5.6 |
| 2020 | 10 | 23 | 10 | 5.3  | 247 | 121 | 314 | 1003 | 12.4 | 336 | 5.9 |
| 2020 | 10 | 23 | 11 | 5.4  | 96  | 923 | 690 | 1003 | 13.1 | 334 | 6.1 |
| 2020 | 10 | 23 | 12 | 5.4  | 96  | 946 | 744 | 1002 | 13.6 | 332 | 6.1 |
| 2020 | 10 | 23 | 13 | 5.4  | 96  | 938 | 728 | 1002 | 13.7 | 330 | 6.1 |
| 2020 | 10 | 23 | 14 | 5.1  | 95  | 899 | 642 | 1002 | 13.5 | 328 | 6.1 |
| 2020 | 10 | 23 | 15 | 5    | 87  | 838 | 500 | 1002 | 13   | 327 | 5.8 |
| 2020 | 10 | 23 | 16 | 4.9  | 77  | 705 | 314 | 1002 | 12.1 | 326 | 5.2 |
| 2020 | 10 | 23 | 17 | 5    | 49  | 420 | 112 | 1003 | 10.4 | 325 | 3.9 |

|      |    |    |    |      |     |     |     |      |      |     |     |
|------|----|----|----|------|-----|-----|-----|------|------|-----|-----|
| 2020 | 10 | 23 | 18 | 5.1  | 0   | 0   | 0   | 1003 | 8.3  | 325 | 2.9 |
| 2020 | 10 | 23 | 19 | 4.9  | 0   | 0   | 0   | 1003 | 8    | 327 | 3.1 |
| 2020 | 10 | 23 | 20 | 4.7  | 0   | 0   | 0   | 1004 | 7.7  | 329 | 3.1 |
| 2020 | 10 | 23 | 21 | 4.6  | 0   | 0   | 0   | 1004 | 7.6  | 330 | 3   |
| 2020 | 10 | 23 | 22 | 4.6  | 0   | 0   | 0   | 1004 | 7.6  | 330 | 2.9 |
| 2020 | 10 | 23 | 23 | 4.5  | 0   | 0   | 0   | 1005 | 7.4  | 330 | 2.8 |
| 2020 | 10 | 24 | 0  | 4.5  | 0   | 0   | 0   | 1005 | 7.3  | 332 | 2.7 |
| 2020 | 10 | 24 | 1  | 4.6  | 0   | 0   | 0   | 1005 | 7.3  | 333 | 2.7 |
| 2020 | 10 | 24 | 2  | 4.8  | 0   | 0   | 0   | 1005 | 7.4  | 335 | 2.7 |
| 2020 | 10 | 24 | 3  | 4.9  | 0   | 0   | 0   | 1005 | 7.3  | 337 | 2.7 |
| 2020 | 10 | 24 | 4  | 5    | 0   | 0   | 0   | 1005 | 7.3  | 340 | 3   |
| 2020 | 10 | 24 | 5  | 4.8  | 0   | 0   | 0   | 1006 | 6.9  | 345 | 3.2 |
| 2020 | 10 | 24 | 6  | 4.4  | 0   | 0   | 0   | 1006 | 6.3  | 348 | 3.1 |
| 2020 | 10 | 24 | 7  | 4.2  | 16  | 135 | 21  | 1007 | 6.3  | 351 | 3   |
| 2020 | 10 | 24 | 8  | 4.2  | 88  | 138 | 120 | 1007 | 8.5  | 349 | 3.6 |
| 2020 | 10 | 24 | 9  | 3.2  | 80  | 783 | 398 | 1008 | 10.6 | 343 | 4.4 |
| 2020 | 10 | 24 | 10 | 3.3  | 92  | 867 | 565 | 1008 | 12   | 337 | 4.8 |
| 2020 | 10 | 24 | 11 | 3.8  | 102 | 906 | 681 | 1007 | 13.1 | 332 | 5.1 |
| 2020 | 10 | 24 | 12 | 4.1  | 107 | 913 | 729 | 1007 | 13.8 | 329 | 5.3 |
| 2020 | 10 | 24 | 13 | 4.2  | 107 | 908 | 714 | 1007 | 13.9 | 328 | 5.3 |
| 2020 | 10 | 24 | 14 | 4.2  | 100 | 883 | 633 | 1007 | 13.8 | 329 | 5.2 |
| 2020 | 10 | 24 | 15 | 4.3  | 89  | 830 | 494 | 1006 | 13.2 | 329 | 4.9 |
| 2020 | 10 | 24 | 16 | 4.5  | 72  | 719 | 311 | 1007 | 12.3 | 330 | 4.3 |
| 2020 | 10 | 24 | 17 | 5.4  | 43  | 468 | 112 | 1007 | 10.2 | 331 | 2.7 |
| 2020 | 10 | 24 | 18 | 5.1  | 0   | 0   | 0   | 1008 | 7.6  | 332 | 1.9 |
| 2020 | 10 | 24 | 19 | 4.9  | 0   | 0   | 0   | 1008 | 7.1  | 333 | 1.8 |
| 2020 | 10 | 24 | 20 | 4.8  | 0   | 0   | 0   | 1008 | 6.7  | 333 | 1.7 |
| 2020 | 10 | 24 | 21 | 4.7  | 0   | 0   | 0   | 1008 | 6.5  | 332 | 1.6 |
| 2020 | 10 | 24 | 22 | 4.6  | 0   | 0   | 0   | 1008 | 6.4  | 329 | 1.5 |
| 2020 | 10 | 24 | 23 | 4.9  | 0   | 0   | 0   | 1008 | 6.4  | 323 | 1.5 |
| 2020 | 10 | 25 | 0  | 5.7  | 0   | 0   | 0   | 1008 | 6.6  | 317 | 1.5 |
| 2020 | 10 | 25 | 1  | 6.9  | 0   | 0   | 0   | 1008 | 7    | 316 | 1.5 |
| 2020 | 10 | 25 | 2  | 7.5  | 0   | 0   | 0   | 1008 | 7.5  | 317 | 1.6 |
| 2020 | 10 | 25 | 3  | 8.2  | 0   | 0   | 0   | 1008 | 8.2  | 322 | 1.6 |
| 2020 | 10 | 25 | 4  | 8.4  | 0   | 0   | 0   | 1008 | 8.4  | 327 | 1.7 |
| 2020 | 10 | 25 | 5  | 8.1  | 0   | 0   | 0   | 1008 | 8.1  | 333 | 1.7 |
| 2020 | 10 | 25 | 6  | 7.5  | 0   | 0   | 0   | 1008 | 7.5  | 338 | 1.5 |
| 2020 | 10 | 25 | 7  | 8.1  | 14  | 77  | 17  | 1008 | 8.1  | 341 | 1.4 |
| 2020 | 10 | 25 | 8  | 9.8  | 68  | 515 | 186 | 1009 | 12.2 | 342 | 2   |
| 2020 | 10 | 25 | 9  | 10   | 95  | 707 | 380 | 1009 | 14.6 | 332 | 3   |
| 2020 | 10 | 25 | 10 | 10.2 | 111 | 798 | 543 | 1009 | 15.8 | 327 | 3.5 |
| 2020 | 10 | 25 | 11 | 10.3 | 118 | 851 | 658 | 1008 | 16.5 | 324 | 3.6 |
| 2020 | 10 | 25 | 12 | 10.5 | 113 | 889 | 715 | 1008 | 17.3 | 323 | 3.7 |
| 2020 | 10 | 25 | 13 | 10.6 | 111 | 886 | 699 | 1007 | 17.7 | 324 | 3.6 |
| 2020 | 10 | 25 | 14 | 10.4 | 234 | 410 | 480 | 1006 | 17.6 | 327 | 3.3 |
| 2020 | 10 | 25 | 15 | 10.3 | 194 | 317 | 348 | 1006 | 16.7 | 328 | 2.7 |
| 2020 | 10 | 25 | 16 | 10.9 | 130 | 190 | 192 | 1006 | 15.7 | 325 | 2.2 |
| 2020 | 10 | 25 | 17 | 11.3 | 50  | 147 | 71  | 1006 | 13.4 | 328 | 1.2 |
| 2020 | 10 | 25 | 18 | 9.2  | 0   | 0   | 0   | 1007 | 10.6 | 331 | 1.2 |
| 2020 | 10 | 25 | 19 | 8.9  | 0   | 0   | 0   | 1007 | 9.7  | 330 | 1.3 |

|      |    |    |    |      |     |     |     |      |      |     |     |
|------|----|----|----|------|-----|-----|-----|------|------|-----|-----|
| 2020 | 10 | 25 | 20 | 8.7  | 0   | 0   | 0   | 1007 | 9    | 333 | 1.3 |
| 2020 | 10 | 25 | 21 | 8.4  | 0   | 0   | 0   | 1007 | 8.4  | 339 | 1.3 |
| 2020 | 10 | 25 | 22 | 7.9  | 0   | 0   | 0   | 1007 | 7.9  | 345 | 1.2 |
| 2020 | 10 | 25 | 23 | 7.5  | 0   | 0   | 0   | 1008 | 7.5  | 348 | 1.2 |
| 2020 | 10 | 26 | 0  | 7.4  | 0   | 0   | 0   | 1008 | 7.4  | 351 | 1.2 |
| 2020 | 10 | 26 | 1  | 7    | 0   | 0   | 0   | 1008 | 7    | 355 | 1.2 |
| 2020 | 10 | 26 | 2  | 6.5  | 0   | 0   | 0   | 1008 | 6.5  | 359 | 1.3 |
| 2020 | 10 | 26 | 3  | 6.1  | 0   | 0   | 0   | 1007 | 6.1  | 3   | 1.3 |
| 2020 | 10 | 26 | 4  | 5.9  | 0   | 0   | 0   | 1007 | 5.9  | 5   | 1.3 |
| 2020 | 10 | 26 | 5  | 5.6  | 0   | 0   | 0   | 1008 | 5.6  | 5   | 1.2 |
| 2020 | 10 | 26 | 6  | 5.4  | 0   | 0   | 0   | 1008 | 5.4  | 8   | 1.2 |
| 2020 | 10 | 26 | 7  | 6.2  | 14  | 81  | 16  | 1008 | 6.2  | 18  | 1.1 |
| 2020 | 10 | 26 | 8  | 8.7  | 68  | 504 | 181 | 1008 | 10.2 | 25  | 1.8 |
| 2020 | 10 | 26 | 9  | 9.8  | 95  | 699 | 374 | 1008 | 12.7 | 15  | 1.8 |
| 2020 | 10 | 26 | 10 | 9.9  | 185 | 481 | 443 | 1008 | 15.4 | 9   | 2.3 |
| 2020 | 10 | 26 | 11 | 10   | 184 | 602 | 564 | 1007 | 16.7 | 6   | 2.3 |
| 2020 | 10 | 26 | 12 | 10.1 | 121 | 870 | 706 | 1007 | 17.4 | 353 | 2.3 |
| 2020 | 10 | 26 | 13 | 10.3 | 124 | 853 | 687 | 1007 | 17.8 | 341 | 2.5 |
| 2020 | 10 | 26 | 14 | 10.7 | 122 | 805 | 601 | 1006 | 18   | 339 | 2.7 |
| 2020 | 10 | 26 | 15 | 10.9 | 166 | 446 | 380 | 1006 | 17.6 | 341 | 2.6 |
| 2020 | 10 | 26 | 16 | 11.6 | 123 | 252 | 205 | 1006 | 16.5 | 344 | 2.1 |
| 2020 | 10 | 26 | 17 | 11.9 | 49  | 66  | 58  | 1006 | 13.9 | 343 | 1.2 |
| 2020 | 10 | 26 | 18 | 9.9  | 0   | 0   | 0   | 1006 | 11.1 | 346 | 1.3 |
| 2020 | 10 | 26 | 19 | 9.7  | 0   | 0   | 0   | 1007 | 10.2 | 350 | 1.3 |
| 2020 | 10 | 26 | 20 | 9.4  | 0   | 0   | 0   | 1007 | 9.5  | 355 | 1.3 |
| 2020 | 10 | 26 | 21 | 8.8  | 0   | 0   | 0   | 1007 | 8.8  | 359 | 1.3 |
| 2020 | 10 | 26 | 22 | 8.2  | 0   | 0   | 0   | 1007 | 8.2  | 3   | 1.2 |
| 2020 | 10 | 26 | 23 | 7.7  | 0   | 0   | 0   | 1007 | 7.7  | 7   | 1.2 |
| 2020 | 10 | 27 | 0  | 7.3  | 0   | 0   | 0   | 1007 | 7.3  | 11  | 1.2 |
| 2020 | 10 | 27 | 1  | 6.8  | 0   | 0   | 0   | 1007 | 6.8  | 15  | 1.2 |
| 2020 | 10 | 27 | 2  | 6.4  | 0   | 0   | 0   | 1007 | 6.4  | 19  | 1.2 |
| 2020 | 10 | 27 | 3  | 6.1  | 0   | 0   | 0   | 1007 | 6.1  | 21  | 1.3 |
| 2020 | 10 | 27 | 4  | 5.8  | 0   | 0   | 0   | 1007 | 5.8  | 23  | 1.3 |
| 2020 | 10 | 27 | 5  | 5.6  | 0   | 0   | 0   | 1008 | 5.6  | 22  | 1.3 |
| 2020 | 10 | 27 | 6  | 5.8  | 0   | 0   | 0   | 1008 | 5.8  | 23  | 1.3 |
| 2020 | 10 | 27 | 7  | 7.2  | 8   | 0   | 8   | 1009 | 7.2  | 26  | 1.2 |
| 2020 | 10 | 27 | 8  | 8.4  | 83  | 156 | 117 | 1009 | 10   | 30  | 1.9 |
| 2020 | 10 | 27 | 9  | 8.8  | 145 | 345 | 281 | 1009 | 11.7 | 31  | 2   |
| 2020 | 10 | 27 | 10 | 9.4  | 185 | 471 | 437 | 1009 | 13.9 | 30  | 1.8 |
| 2020 | 10 | 27 | 11 | 8.9  | 156 | 743 | 622 | 1009 | 16.6 | 38  | 1.9 |
| 2020 | 10 | 27 | 12 | 9    | 202 | 600 | 603 | 1008 | 18.3 | 39  | 1.5 |
| 2020 | 10 | 27 | 13 | 9.3  | 205 | 575 | 582 | 1007 | 19.3 | 21  | 1.2 |
| 2020 | 10 | 27 | 14 | 9.7  | 155 | 707 | 572 | 1007 | 19.7 | 354 | 1.4 |
| 2020 | 10 | 27 | 15 | 10.5 | 138 | 626 | 436 | 1007 | 19.4 | 340 | 1.6 |
| 2020 | 10 | 27 | 16 | 11.8 | 108 | 477 | 261 | 1007 | 18.3 | 339 | 1.6 |
| 2020 | 10 | 27 | 17 | 12.2 | 51  | 210 | 80  | 1008 | 14.9 | 340 | 1.2 |
| 2020 | 10 | 27 | 18 | 10.3 | 0   | 0   | 0   | 1008 | 12.2 | 344 | 1.4 |
| 2020 | 10 | 27 | 19 | 10   | 0   | 0   | 0   | 1009 | 11.4 | 352 | 1.4 |
| 2020 | 10 | 27 | 20 | 9.9  | 0   | 0   | 0   | 1009 | 10.9 | 359 | 1.4 |
| 2020 | 10 | 27 | 21 | 9.9  | 0   | 0   | 0   | 1009 | 10.9 | 2   | 1.3 |



|      |    |    |    |      |     |     |     |      |      |     |     |
|------|----|----|----|------|-----|-----|-----|------|------|-----|-----|
| 2020 | 10 | 27 | 22 | 9.9  | 0   | 0   | 0   | 1009 | 10.9 | 1   | 1.2 |
| 2020 | 10 | 27 | 23 | 10   | 0   | 0   | 0   | 1009 | 10.7 | 359 | 1.3 |
| 2020 | 10 | 28 | 0  | 10.2 | 0   | 0   | 0   | 1009 | 10.6 | 360 | 1.3 |
| 2020 | 10 | 28 | 1  | 10.4 | 0   | 0   | 0   | 1009 | 10.4 | 359 | 1.3 |
| 2020 | 10 | 28 | 2  | 10.3 | 0   | 0   | 0   | 1010 | 10.3 | 358 | 1.3 |
| 2020 | 10 | 28 | 3  | 10.2 | 0   | 0   | 0   | 1009 | 10.2 | 359 | 1.2 |
| 2020 | 10 | 28 | 4  | 10   | 0   | 0   | 0   | 1009 | 10   | 359 | 1.2 |
| 2020 | 10 | 28 | 5  | 10.2 | 0   | 0   | 0   | 1009 | 10.2 | 358 | 1.2 |
| 2020 | 10 | 28 | 6  | 10.2 | 0   | 0   | 0   | 1009 | 10.2 | 359 | 1.2 |
| 2020 | 10 | 28 | 7  | 10.7 | 5   | 6   | 5   | 1010 | 10.7 | 1   | 1.2 |
| 2020 | 10 | 28 | 8  | 12.5 | 40  | 0   | 40  | 1010 | 13.2 | 1   | 1.9 |
| 2020 | 10 | 28 | 9  | 13.3 | 162 | 86  | 195 | 1010 | 15.5 | 353 | 2.7 |
| 2020 | 10 | 28 | 10 | 13.6 | 241 | 385 | 445 | 1010 | 17.1 | 346 | 3.2 |
| 2020 | 10 | 28 | 11 | 13.7 | 289 | 194 | 410 | 1010 | 18   | 341 | 3.4 |
| 2020 | 10 | 28 | 12 | 13.3 | 272 | 37  | 296 | 1009 | 18.4 | 338 | 3.8 |
| 2020 | 10 | 28 | 13 | 12.1 | 293 | 286 | 480 | 1009 | 18.4 | 335 | 4   |
| 2020 | 10 | 28 | 14 | 10.4 | 172 | 647 | 551 | 1009 | 18   | 335 | 4.1 |
| 2020 | 10 | 28 | 15 | 8.9  | 137 | 625 | 432 | 1009 | 17   | 336 | 3.9 |
| 2020 | 10 | 28 | 16 | 8.8  | 85  | 597 | 274 | 1009 | 15.6 | 335 | 3.2 |
| 2020 | 10 | 28 | 17 | 9.2  | 42  | 386 | 92  | 1009 | 12.7 | 333 | 2   |
| 2020 | 10 | 28 | 18 | 7.7  | 0   | 0   | 0   | 1010 | 10.2 | 337 | 1.9 |
| 2020 | 10 | 28 | 19 | 7.3  | 0   | 0   | 0   | 1010 | 9.8  | 341 | 2   |
| 2020 | 10 | 28 | 20 | 6.8  | 0   | 0   | 0   | 1010 | 9.4  | 345 | 2   |
| 2020 | 10 | 28 | 21 | 6.4  | 0   | 0   | 0   | 1010 | 8.7  | 349 | 2   |
| 2020 | 10 | 28 | 22 | 5.9  | 0   | 0   | 0   | 1010 | 8.1  | 353 | 2.1 |
| 2020 | 10 | 28 | 23 | 5.5  | 0   | 0   | 0   | 1011 | 7.4  | 357 | 2.1 |
| 2020 | 10 | 29 | 0  | 5.1  | 0   | 0   | 0   | 1011 | 7    | 1   | 2.2 |
| 2020 | 10 | 29 | 1  | 4.5  | 0   | 0   | 0   | 1011 | 6.5  | 5   | 2.3 |
| 2020 | 10 | 29 | 2  | 3.7  | 0   | 0   | 0   | 1012 | 5.7  | 7   | 2.2 |
| 2020 | 10 | 29 | 3  | 2.9  | 0   | 0   | 0   | 1011 | 5    | 8   | 2   |
| 2020 | 10 | 29 | 4  | 2.5  | 0   | 0   | 0   | 1011 | 4.5  | 6   | 1.9 |
| 2020 | 10 | 29 | 5  | 2.2  | 0   | 0   | 0   | 1011 | 4.1  | 4   | 1.9 |
| 2020 | 10 | 29 | 6  | 2    | 0   | 0   | 0   | 1011 | 3.8  | 5   | 1.8 |
| 2020 | 10 | 29 | 7  | 2.2  | 11  | 126 | 14  | 1011 | 4.3  | 8   | 1.8 |
| 2020 | 10 | 29 | 8  | 2.9  | 66  | 363 | 144 | 1012 | 7.7  | 9   | 2.8 |
| 2020 | 10 | 29 | 9  | 3.4  | 78  | 774 | 378 | 1012 | 10.3 | 2   | 3.2 |
| 2020 | 10 | 29 | 10 | 2.8  | 95  | 851 | 542 | 1011 | 12.5 | 1   | 3.6 |
| 2020 | 10 | 29 | 11 | 3    | 242 | 420 | 502 | 1011 | 13.4 | 358 | 3.5 |
| 2020 | 10 | 29 | 12 | 3.3  | 207 | 572 | 585 | 1011 | 13.7 | 355 | 3.3 |
| 2020 | 10 | 29 | 13 | 4.1  | 112 | 884 | 684 | 1010 | 14.8 | 350 | 3.3 |
| 2020 | 10 | 29 | 14 | 4.4  | 222 | 422 | 468 | 1009 | 14.9 | 348 | 3.2 |
| 2020 | 10 | 29 | 15 | 5    | 101 | 770 | 460 | 1009 | 14.6 | 346 | 3.2 |
| 2020 | 10 | 29 | 16 | 6.1  | 81  | 635 | 279 | 1009 | 13.6 | 344 | 2.8 |
| 2020 | 10 | 29 | 17 | 7.2  | 44  | 336 | 87  | 1010 | 10.6 | 345 | 1.7 |
| 2020 | 10 | 29 | 18 | 5.8  | 0   | 0   | 0   | 1010 | 8.1  | 347 | 1.7 |
| 2020 | 10 | 29 | 19 | 5.4  | 0   | 0   | 0   | 1010 | 7.5  | 352 | 1.8 |
| 2020 | 10 | 29 | 20 | 5.2  | 0   | 0   | 0   | 1010 | 7.3  | 359 | 1.8 |
| 2020 | 10 | 29 | 21 | 5    | 0   | 0   | 0   | 1010 | 7.1  | 7   | 1.7 |
| 2020 | 10 | 29 | 22 | 4.6  | 0   | 0   | 0   | 1010 | 6.7  | 14  | 1.6 |
| 2020 | 10 | 29 | 23 | 4.1  | 0   | 0   | 0   | 1010 | 6.2  | 18  | 1.5 |

|      |    |    |    |     |     |     |     |      |      |     |     |
|------|----|----|----|-----|-----|-----|-----|------|------|-----|-----|
| 2020 | 10 | 30 | 0  | 3.5 | 0   | 0   | 0   | 1010 | 5.7  | 18  | 1.4 |
| 2020 | 10 | 30 | 1  | 3.1 | 0   | 0   | 0   | 1010 | 5.4  | 19  | 1.5 |
| 2020 | 10 | 30 | 2  | 2.8 | 0   | 0   | 0   | 1010 | 5.1  | 19  | 1.5 |
| 2020 | 10 | 30 | 3  | 2.5 | 0   | 0   | 0   | 1010 | 4.8  | 19  | 1.5 |
| 2020 | 10 | 30 | 4  | 2.1 | 0   | 0   | 0   | 1010 | 4.4  | 18  | 1.6 |
| 2020 | 10 | 30 | 5  | 1.8 | 0   | 0   | 0   | 1010 | 4.1  | 18  | 1.6 |
| 2020 | 10 | 30 | 6  | 1.6 | 0   | 0   | 0   | 1011 | 3.8  | 21  | 1.5 |
| 2020 | 10 | 30 | 7  | 2.1 | 5   | 0   | 5   | 1011 | 4.5  | 27  | 1.5 |
| 2020 | 10 | 30 | 8  | 2.8 | 71  | 436 | 164 | 1012 | 7.6  | 33  | 2.2 |
| 2020 | 10 | 30 | 9  | 3.9 | 98  | 668 | 354 | 1012 | 10   | 34  | 2.3 |
| 2020 | 10 | 30 | 10 | 6.5 | 109 | 786 | 519 | 1012 | 13.4 | 38  | 2.4 |
| 2020 | 10 | 30 | 11 | 7.5 | 113 | 843 | 631 | 1012 | 15.7 | 44  | 2.4 |
| 2020 | 10 | 30 | 12 | 7.8 | 116 | 863 | 682 | 1011 | 16.6 | 41  | 2.2 |
| 2020 | 10 | 30 | 13 | 7.9 | 114 | 862 | 667 | 1011 | 17.2 | 40  | 2.2 |
| 2020 | 10 | 30 | 14 | 8   | 106 | 838 | 590 | 1011 | 17.4 | 41  | 2.2 |
| 2020 | 10 | 30 | 15 | 8.1 | 96  | 769 | 452 | 1011 | 17.1 | 45  | 2.1 |
| 2020 | 10 | 30 | 16 | 9   | 77  | 639 | 274 | 1011 | 16.3 | 51  | 1.5 |
| 2020 | 10 | 30 | 17 | 9.4 | 41  | 347 | 84  | 1011 | 13.6 | 57  | 1   |
| 2020 | 10 | 30 | 18 | 6.9 | 0   | 0   | 0   | 1012 | 11.8 | 68  | 1.2 |
| 2020 | 10 | 30 | 19 | 6.6 | 0   | 0   | 0   | 1012 | 10.5 | 82  | 1.2 |
| 2020 | 10 | 30 | 20 | 6.5 | 0   | 0   | 0   | 1013 | 9.3  | 94  | 1.3 |
| 2020 | 10 | 30 | 21 | 6.5 | 0   | 0   | 0   | 1013 | 8.4  | 99  | 1.4 |
| 2020 | 10 | 30 | 22 | 6.3 | 0   | 0   | 0   | 1013 | 7.9  | 100 | 1.5 |
| 2020 | 10 | 30 | 23 | 5.8 | 0   | 0   | 0   | 1013 | 7.3  | 99  | 1.6 |
| 2020 | 10 | 31 | 0  | 5.2 | 0   | 0   | 0   | 1013 | 6.8  | 98  | 1.6 |
| 2020 | 10 | 31 | 1  | 4.9 | 0   | 0   | 0   | 1013 | 6.3  | 96  | 1.4 |
| 2020 | 10 | 31 | 2  | 4.8 | 0   | 0   | 0   | 1014 | 5.9  | 92  | 1.3 |
| 2020 | 10 | 31 | 3  | 4.8 | 0   | 0   | 0   | 1014 | 5.6  | 91  | 1.4 |
| 2020 | 10 | 31 | 4  | 4.9 | 0   | 0   | 0   | 1014 | 5.4  | 96  | 1.5 |
| 2020 | 10 | 31 | 5  | 5   | 0   | 0   | 0   | 1014 | 5.2  | 100 | 1.5 |
| 2020 | 10 | 31 | 6  | 4.9 | 0   | 0   | 0   | 1014 | 5    | 102 | 1.5 |
| 2020 | 10 | 31 | 7  | 5   | 0   | 0   | 0   | 1014 | 5.9  | 103 | 1.6 |
| 2020 | 10 | 31 | 8  | 6.4 | 63  | 503 | 167 | 1014 | 9.5  | 104 | 2.5 |
| 2020 | 10 | 31 | 9  | 6.9 | 90  | 708 | 359 | 1014 | 12   | 109 | 2.9 |
| 2020 | 10 | 31 | 10 | 6.9 | 104 | 811 | 523 | 1014 | 13.9 | 115 | 2.8 |
| 2020 | 10 | 31 | 11 | 6.9 | 111 | 864 | 637 | 1013 | 15.5 | 117 | 2.4 |
| 2020 | 10 | 31 | 12 | 7   | 115 | 878 | 687 | 1012 | 16.6 | 120 | 1.9 |
| 2020 | 10 | 31 | 13 | 7   | 114 | 874 | 671 | 1011 | 17.2 | 125 | 1.4 |
| 2020 | 10 | 31 | 14 | 6.9 | 108 | 842 | 590 | 1011 | 17.4 | 133 | 1   |
| 2020 | 10 | 31 | 15 | 6.7 | 196 | 90  | 238 | 1010 | 17.2 | 140 | 0.6 |
| 2020 | 10 | 31 | 16 | 7.5 | 82  | 617 | 270 | 1010 | 16.6 | 143 | 0.6 |
| 2020 | 10 | 31 | 17 | 8   | 42  | 320 | 81  | 1010 | 14.9 | 146 | 0.6 |
| 2020 | 10 | 31 | 18 | 6.9 | 0   | 0   | 0   | 1010 | 13.1 | 149 | 0.9 |
| 2020 | 10 | 31 | 19 | 6.2 | 0   | 0   | 0   | 1010 | 11.4 | 152 | 1.1 |
| 2020 | 10 | 31 | 20 | 5.8 | 0   | 0   | 0   | 1010 | 9.8  | 152 | 1.3 |
| 2020 | 10 | 31 | 21 | 5.8 | 0   | 0   | 0   | 1010 | 8.9  | 151 | 1.3 |
| 2020 | 10 | 31 | 22 | 5.9 | 0   | 0   | 0   | 1010 | 8.6  | 151 | 1.3 |
| 2020 | 10 | 31 | 23 | 6.1 | 0   | 0   | 0   | 1010 | 8.5  | 153 | 1.3 |
| 2020 | 11 | 1  | 0  | 6.6 | 0   | 0   | 0   | 1010 | 8.6  | 153 | 1.3 |
| 2020 | 11 | 1  | 1  | 7.1 | 0   | 0   | 0   | 1010 | 8.7  | 154 | 1.3 |

|      |    |   |    |      |     |     |     |      |      |     |     |
|------|----|---|----|------|-----|-----|-----|------|------|-----|-----|
| 2020 | 11 | 1 | 2  | 7.9  | 0   | 0   | 0   | 1010 | 9.4  | 164 | 1.2 |
| 2020 | 11 | 1 | 3  | 8.5  | 0   | 0   | 0   | 1010 | 9.7  | 159 | 1.2 |
| 2020 | 11 | 1 | 4  | 8.9  | 0   | 0   | 0   | 1010 | 9.9  | 156 | 1.1 |
| 2020 | 11 | 1 | 5  | 9    | 0   | 0   | 0   | 1010 | 9.9  | 147 | 1.1 |
| 2020 | 11 | 1 | 6  | 9.2  | 0   | 0   | 0   | 1010 | 10   | 141 | 1.1 |
| 2020 | 11 | 1 | 7  | 9.3  | 0   | 0   | 0   | 1010 | 10.2 | 141 | 1   |
| 2020 | 11 | 1 | 8  | 10.8 | 18  | 0   | 18  | 1010 | 11.8 | 138 | 1.1 |
| 2020 | 11 | 1 | 9  | 11.5 | 89  | 0   | 89  | 1010 | 13.5 | 134 | 2.3 |
| 2020 | 11 | 1 | 10 | 11.9 | 135 | 0   | 135 | 1009 | 15   | 137 | 2.6 |
| 2020 | 11 | 1 | 11 | 11.9 | 52  | 0   | 52  | 1009 | 16.5 | 152 | 2.7 |
| 2020 | 11 | 1 | 12 | 11.9 | 56  | 0   | 56  | 1008 | 17.4 | 165 | 2.8 |
| 2020 | 11 | 1 | 13 | 12   | 55  | 0   | 55  | 1007 | 17.8 | 177 | 2.8 |
| 2020 | 11 | 1 | 14 | 12.3 | 104 | 0   | 104 | 1007 | 17.8 | 189 | 2.5 |
| 2020 | 11 | 1 | 15 | 12.8 | 34  | 0   | 34  | 1007 | 17.3 | 204 | 2   |
| 2020 | 11 | 1 | 16 | 13.5 | 40  | 0   | 40  | 1007 | 16.4 | 217 | 1.3 |
| 2020 | 11 | 1 | 17 | 13.4 | 7   | 0   | 7   | 1007 | 14.9 | 221 | 0.7 |
| 2020 | 11 | 1 | 18 | 12.1 | 0   | 0   | 0   | 1007 | 13.6 | 213 | 0.8 |
| 2020 | 11 | 1 | 19 | 11.8 | 0   | 0   | 0   | 1008 | 13   | 207 | 0.8 |
| 2020 | 11 | 1 | 20 | 11.7 | 0   | 0   | 0   | 1008 | 12.4 | 214 | 0.9 |
| 2020 | 11 | 1 | 21 | 11.6 | 0   | 0   | 0   | 1008 | 12   | 221 | 0.8 |
| 2020 | 11 | 1 | 22 | 11.5 | 0   | 0   | 0   | 1008 | 11.6 | 227 | 0.8 |
| 2020 | 11 | 1 | 23 | 11.3 | 0   | 0   | 0   | 1008 | 11.3 | 235 | 0.8 |
| 2020 | 11 | 2 | 0  | 11.1 | 0   | 0   | 0   | 1008 | 11.1 | 255 | 0.9 |
| 2020 | 11 | 2 | 1  | 11.1 | 0   | 0   | 0   | 1008 | 11.1 | 277 | 0.9 |
| 2020 | 11 | 2 | 2  | 11   | 0   | 0   | 0   | 1008 | 11   | 293 | 0.9 |
| 2020 | 11 | 2 | 3  | 11   | 0   | 0   | 0   | 1008 | 11   | 307 | 1   |
| 2020 | 11 | 2 | 4  | 10.8 | 0   | 0   | 0   | 1008 | 10.9 | 326 | 1   |
| 2020 | 11 | 2 | 5  | 10.7 | 0   | 0   | 0   | 1008 | 10.7 | 342 | 1.1 |
| 2020 | 11 | 2 | 6  | 10.2 | 0   | 0   | 0   | 1008 | 10.3 | 356 | 1.2 |
| 2020 | 11 | 2 | 7  | 9.6  | 0   | 0   | 0   | 1008 | 9.8  | 9   | 1.2 |
| 2020 | 11 | 2 | 8  | 11.4 | 85  | 242 | 134 | 1009 | 12.1 | 17  | 2   |
| 2020 | 11 | 2 | 9  | 11.3 | 115 | 0   | 115 | 1009 | 13.4 | 22  | 2.4 |
| 2020 | 11 | 2 | 10 | 9.3  | 226 | 120 | 287 | 1009 | 14.7 | 18  | 2.9 |
| 2020 | 11 | 2 | 11 | 7.6  | 277 | 206 | 401 | 1008 | 15.7 | 8   | 3.1 |
| 2020 | 11 | 2 | 12 | 7.2  | 265 | 387 | 514 | 1008 | 16.3 | 356 | 3.2 |
| 2020 | 11 | 2 | 13 | 7.3  | 187 | 679 | 615 | 1007 | 16.5 | 348 | 3.4 |
| 2020 | 11 | 2 | 14 | 7.2  | 161 | 687 | 549 | 1007 | 16.3 | 345 | 3.5 |
| 2020 | 11 | 2 | 15 | 6.8  | 139 | 614 | 415 | 1007 | 15.6 | 345 | 3.4 |
| 2020 | 11 | 2 | 16 | 7.2  | 94  | 528 | 251 | 1007 | 14.3 | 345 | 2.6 |
| 2020 | 11 | 2 | 17 | 7.7  | 39  | 51  | 45  | 1007 | 11.1 | 347 | 1.5 |
| 2020 | 11 | 2 | 18 | 5.8  | 0   | 0   | 0   | 1007 | 8.6  | 350 | 1.4 |
| 2020 | 11 | 2 | 19 | 4.8  | 0   | 0   | 0   | 1008 | 7.7  | 352 | 1.4 |
| 2020 | 11 | 2 | 20 | 3.8  | 0   | 0   | 0   | 1008 | 7    | 353 | 1.3 |
| 2020 | 11 | 2 | 21 | 2.9  | 0   | 0   | 0   | 1008 | 6.7  | 353 | 1.3 |
| 2020 | 11 | 2 | 22 | 2.1  | 0   | 0   | 0   | 1008 | 6.6  | 347 | 1.3 |
| 2020 | 11 | 2 | 23 | 1.7  | 0   | 0   | 0   | 1008 | 6.3  | 334 | 1.3 |
| 2020 | 11 | 3 | 0  | 1.7  | 0   | 0   | 0   | 1008 | 5.9  | 317 | 1.3 |
| 2020 | 11 | 3 | 1  | 2    | 0   | 0   | 0   | 1008 | 5.7  | 302 | 1.3 |
| 2020 | 11 | 3 | 2  | 2.4  | 0   | 0   | 0   | 1007 | 5.5  | 287 | 1.4 |
| 2020 | 11 | 3 | 3  | 3.6  | 0   | 0   | 0   | 1007 | 5.5  | 286 | 1.5 |

|      |    |   |    |      |     |     |     |      |      |     |     |
|------|----|---|----|------|-----|-----|-----|------|------|-----|-----|
| 2020 | 11 | 3 | 4  | 6    | 0   | 0   | 0   | 1007 | 7.5  | 313 | 2.1 |
| 2020 | 11 | 3 | 5  | 7.5  | 0   | 0   | 0   | 1007 | 9    | 344 | 4.2 |
| 2020 | 11 | 3 | 6  | 6.4  | 0   | 0   | 0   | 1008 | 7.1  | 2   | 4.4 |
| 2020 | 11 | 3 | 7  | 4.3  | 0   | 0   | 0   | 1009 | 5.6  | 7   | 3.6 |
| 2020 | 11 | 3 | 8  | 3.7  | 78  | 337 | 144 | 1009 | 6    | 4   | 3.7 |
| 2020 | 11 | 3 | 9  | 3.5  | 106 | 628 | 338 | 1010 | 7.8  | 354 | 4.5 |
| 2020 | 11 | 3 | 10 | 2.3  | 112 | 786 | 510 | 1009 | 9.4  | 342 | 5.6 |
| 2020 | 11 | 3 | 11 | 1.2  | 108 | 875 | 630 | 1009 | 10.3 | 333 | 6.3 |
| 2020 | 11 | 3 | 12 | 1.2  | 109 | 899 | 683 | 1009 | 10.8 | 330 | 6.8 |
| 2020 | 11 | 3 | 13 | 1.3  | 262 | 365 | 491 | 1008 | 10.8 | 330 | 7.1 |
| 2020 | 11 | 3 | 14 | 1.1  | 217 | 27  | 232 | 1008 | 10.3 | 330 | 7   |
| 2020 | 11 | 3 | 15 | 0.8  | 188 | 225 | 289 | 1008 | 9.6  | 331 | 6.7 |
| 2020 | 11 | 3 | 16 | 0.7  | 19  | 0   | 19  | 1009 | 8.7  | 333 | 6   |
| 2020 | 11 | 3 | 17 | 1.1  | 44  | 260 | 72  | 1009 | 7.5  | 336 | 5   |
| 2020 | 11 | 3 | 18 | 1.3  | 0   | 0   | 0   | 1009 | 6.3  | 340 | 4.3 |
| 2020 | 11 | 3 | 19 | 1.3  | 0   | 0   | 0   | 1009 | 5.1  | 343 | 3.5 |
| 2020 | 11 | 3 | 20 | 1.3  | 0   | 0   | 0   | 1010 | 4.1  | 346 | 2.9 |
| 2020 | 11 | 3 | 21 | 1.1  | 0   | 0   | 0   | 1010 | 3.4  | 348 | 2.4 |
| 2020 | 11 | 3 | 22 | 0.9  | 0   | 0   | 0   | 1011 | 2.8  | 349 | 2.1 |
| 2020 | 11 | 3 | 23 | 0.7  | 0   | 0   | 0   | 1011 | 2.4  | 351 | 1.9 |
| 2020 | 11 | 4 | 0  | 0.5  | 0   | 0   | 0   | 1011 | 2.1  | 352 | 1.8 |
| 2020 | 11 | 4 | 1  | 0.5  | 0   | 0   | 0   | 1011 | 2    | 353 | 1.7 |
| 2020 | 11 | 4 | 2  | 0.6  | 0   | 0   | 0   | 1011 | 2    | 353 | 1.7 |
| 2020 | 11 | 4 | 3  | 0.9  | 0   | 0   | 0   | 1012 | 2.3  | 355 | 1.7 |
| 2020 | 11 | 4 | 4  | 1.1  | 0   | 0   | 0   | 1012 | 2.5  | 359 | 1.7 |
| 2020 | 11 | 4 | 5  | 1.1  | 0   | 0   | 0   | 1012 | 2.3  | 4   | 1.8 |
| 2020 | 11 | 4 | 6  | 0.6  | 0   | 0   | 0   | 1013 | 1.4  | 9   | 1.8 |
| 2020 | 11 | 4 | 7  | 0.2  | 0   | 0   | 0   | 1013 | 1.3  | 16  | 2   |
| 2020 | 11 | 4 | 8  | -0.1 | 55  | 533 | 158 | 1013 | 3.7  | 22  | 3.2 |
| 2020 | 11 | 4 | 9  | -0.7 | 78  | 758 | 355 | 1014 | 5.9  | 11  | 3.7 |
| 2020 | 11 | 4 | 10 | -0.3 | 201 | 335 | 368 | 1013 | 7.7  | 359 | 4.1 |
| 2020 | 11 | 4 | 11 | -0.1 | 97  | 908 | 636 | 1013 | 8.9  | 354 | 4.1 |
| 2020 | 11 | 4 | 12 | 0.1  | 97  | 934 | 689 | 1012 | 9.9  | 353 | 4.1 |
| 2020 | 11 | 4 | 13 | 0.5  | 95  | 932 | 674 | 1012 | 10.5 | 353 | 3.9 |
| 2020 | 11 | 4 | 14 | 0.7  | 89  | 905 | 593 | 1011 | 10.9 | 352 | 3.6 |
| 2020 | 11 | 4 | 15 | 0.8  | 81  | 839 | 452 | 1011 | 10.7 | 353 | 3.2 |
| 2020 | 11 | 4 | 16 | 1.4  | 65  | 706 | 269 | 1011 | 9.7  | 354 | 2.4 |
| 2020 | 11 | 4 | 17 | 3    | 34  | 392 | 75  | 1012 | 6.5  | 354 | 1.2 |
| 2020 | 11 | 4 | 18 | 1.2  | 0   | 0   | 0   | 1012 | 4.2  | 356 | 1.2 |
| 2020 | 11 | 4 | 19 | 0.5  | 0   | 0   | 0   | 1013 | 3.5  | 360 | 1.2 |
| 2020 | 11 | 4 | 20 | -0.1 | 0   | 0   | 0   | 1013 | 2.8  | 5   | 1.2 |
| 2020 | 11 | 4 | 21 | -0.8 | 0   | 0   | 0   | 1013 | 2.3  | 9   | 1.2 |
| 2020 | 11 | 4 | 22 | -1.4 | 0   | 0   | 0   | 1013 | 1.8  | 13  | 1.2 |
| 2020 | 11 | 4 | 23 | -2   | 0   | 0   | 0   | 1013 | 1.3  | 15  | 1.3 |
| 2020 | 11 | 5 | 0  | -2.4 | 0   | 0   | 0   | 1013 | 0.7  | 17  | 1.3 |
| 2020 | 11 | 5 | 1  | -2.8 | 0   | 0   | 0   | 1013 | 0.1  | 19  | 1.3 |
| 2020 | 11 | 5 | 2  | -3   | 0   | 0   | 0   | 1014 | -0.2 | 22  | 1.4 |
| 2020 | 11 | 5 | 3  | -3.2 | 0   | 0   | 0   | 1013 | -0.4 | 26  | 1.4 |
| 2020 | 11 | 5 | 4  | -3.2 | 0   | 0   | 0   | 1013 | -0.3 | 31  | 1.4 |
| 2020 | 11 | 5 | 5  | -3.4 | 0   | 0   | 0   | 1014 | -0.3 | 38  | 1.4 |

|      |    |   |    |      |     |     |     |      |      |     |     |
|------|----|---|----|------|-----|-----|-----|------|------|-----|-----|
| 2020 | 11 | 5 | 6  | -3.4 | 0   | 0   | 0   | 1014 | -0.3 | 47  | 1.3 |
| 2020 | 11 | 5 | 7  | -2.6 | 0   | 0   | 0   | 1014 | 0.4  | 62  | 1.3 |
| 2020 | 11 | 5 | 8  | -1.4 | 56  | 391 | 130 | 1014 | 3.9  | 84  | 2   |
| 2020 | 11 | 5 | 9  | -0.8 | 106 | 494 | 284 | 1015 | 6.3  | 102 | 2.3 |
| 2020 | 11 | 5 | 10 | 1    | 214 | 235 | 331 | 1015 | 9.5  | 117 | 2.3 |
| 2020 | 11 | 5 | 11 | 0.9  | 134 | 781 | 594 | 1014 | 12.4 | 123 | 2.3 |
| 2020 | 11 | 5 | 12 | 2.1  | 130 | 826 | 651 | 1014 | 13.8 | 122 | 2.1 |
| 2020 | 11 | 5 | 13 | 3    | 130 | 811 | 631 | 1013 | 14.7 | 117 | 1.8 |
| 2020 | 11 | 5 | 14 | 3.5  | 226 | 345 | 417 | 1013 | 15.1 | 116 | 1.5 |
| 2020 | 11 | 5 | 15 | 4.4  | 174 | 300 | 306 | 1013 | 14.9 | 118 | 1.4 |
| 2020 | 11 | 5 | 16 | 6.4  | 99  | 1   | 99  | 1013 | 13.9 | 123 | 1.1 |
| 2020 | 11 | 5 | 17 | 6.4  | 24  | 0   | 24  | 1013 | 11.2 | 133 | 0.9 |
| 2020 | 11 | 5 | 18 | 4.7  | 0   | 0   | 0   | 1013 | 9.4  | 134 | 1.1 |
| 2020 | 11 | 5 | 19 | 4.5  | 0   | 0   | 0   | 1013 | 8.4  | 132 | 1.2 |
| 2020 | 11 | 5 | 20 | 4.2  | 0   | 0   | 0   | 1013 | 7.8  | 129 | 1.2 |
| 2020 | 11 | 5 | 21 | 4    | 0   | 0   | 0   | 1013 | 7.2  | 125 | 1.2 |
| 2020 | 11 | 5 | 22 | 3.8  | 0   | 0   | 0   | 1013 | 6.8  | 125 | 1.2 |
| 2020 | 11 | 5 | 23 | 3.5  | 0   | 0   | 0   | 1013 | 6.7  | 125 | 1.2 |
| 2020 | 11 | 6 | 0  | 3.3  | 0   | 0   | 0   | 1013 | 6.5  | 122 | 1.2 |
| 2020 | 11 | 6 | 1  | 3.2  | 0   | 0   | 0   | 1013 | 6.3  | 121 | 1.3 |
| 2020 | 11 | 6 | 2  | 3.2  | 0   | 0   | 0   | 1012 | 6.1  | 122 | 1.3 |
| 2020 | 11 | 6 | 3  | 3.5  | 0   | 0   | 0   | 1012 | 5.9  | 123 | 1.3 |
| 2020 | 11 | 6 | 4  | 3.8  | 0   | 0   | 0   | 1011 | 5.9  | 122 | 1.3 |
| 2020 | 11 | 6 | 5  | 4.2  | 0   | 0   | 0   | 1011 | 5.9  | 122 | 1.4 |
| 2020 | 11 | 6 | 6  | 4.6  | 0   | 0   | 0   | 1011 | 6    | 121 | 1.4 |
| 2020 | 11 | 6 | 7  | 5.3  | 0   | 0   | 0   | 1011 | 6.6  | 119 | 1.3 |
| 2020 | 11 | 6 | 8  | 7.8  | 39  | 0   | 39  | 1011 | 10.2 | 115 | 1.6 |
| 2020 | 11 | 6 | 9  | 8.6  | 35  | 0   | 35  | 1011 | 12.8 | 112 | 2.5 |
| 2020 | 11 | 6 | 10 | 10.2 | 50  | 0   | 50  | 1011 | 15   | 121 | 2.2 |
| 2020 | 11 | 6 | 11 | 11.6 | 88  | 0   | 88  | 1010 | 16.1 | 145 | 1.5 |
| 2020 | 11 | 6 | 12 | 12.2 | 52  | 0   | 52  | 1009 | 16.7 | 158 | 1.6 |
| 2020 | 11 | 6 | 13 | 12.7 | 105 | 0   | 105 | 1008 | 17.3 | 160 | 1.6 |
| 2020 | 11 | 6 | 14 | 13.2 | 98  | 0   | 98  | 1007 | 17.6 | 166 | 1.4 |
| 2020 | 11 | 6 | 15 | 13.7 | 31  | 0   | 31  | 1007 | 17.4 | 165 | 1.2 |
| 2020 | 11 | 6 | 16 | 14.5 | 16  | 0   | 16  | 1007 | 16.9 | 157 | 0.9 |
| 2020 | 11 | 6 | 17 | 13.5 | 5   | 0   | 5   | 1007 | 14.8 | 149 | 0.8 |
| 2020 | 11 | 6 | 18 | 12.4 | 0   | 0   | 0   | 1007 | 13.6 | 145 | 1   |
| 2020 | 11 | 6 | 19 | 12.1 | 0   | 0   | 0   | 1007 | 13.2 | 141 | 1   |
| 2020 | 11 | 6 | 20 | 11.9 | 0   | 0   | 0   | 1007 | 12.9 | 139 | 1   |
| 2020 | 11 | 6 | 21 | 11.7 | 0   | 0   | 0   | 1007 | 12.6 | 138 | 1   |
| 2020 | 11 | 6 | 22 | 11.5 | 0   | 0   | 0   | 1007 | 12.2 | 134 | 1   |
| 2020 | 11 | 6 | 23 | 11.3 | 0   | 0   | 0   | 1007 | 11.9 | 132 | 1   |
| 2020 | 11 | 7 | 0  | 11.2 | 0   | 0   | 0   | 1006 | 11.8 | 132 | 0.9 |
| 2020 | 11 | 7 | 1  | 11.2 | 0   | 0   | 0   | 1006 | 12.1 | 140 | 0.7 |
| 2020 | 11 | 7 | 2  | 11.2 | 0   | 0   | 0   | 1006 | 12.5 | 177 | 0.4 |
| 2020 | 11 | 7 | 3  | 11.2 | 0   | 0   | 0   | 1006 | 12.1 | 269 | 0.6 |
| 2020 | 11 | 7 | 4  | 10.7 | 0   | 0   | 0   | 1006 | 10.7 | 296 | 0.9 |
| 2020 | 11 | 7 | 5  | 10   | 0   | 0   | 0   | 1006 | 10   | 306 | 1.1 |
| 2020 | 11 | 7 | 6  | 9.8  | 0   | 0   | 0   | 1006 | 9.8  | 311 | 1.1 |
| 2020 | 11 | 7 | 7  | 10.2 | 0   | 0   | 0   | 1006 | 10.2 | 312 | 1   |

|      |    |   |    |      |     |     |     |      |      |     |     |
|------|----|---|----|------|-----|-----|-----|------|------|-----|-----|
| 2020 | 11 | 7 | 8  | 12.5 | 54  | 0   | 54  | 1007 | 12.9 | 314 | 1.2 |
| 2020 | 11 | 7 | 9  | 13.3 | 123 | 3   | 124 | 1007 | 15.4 | 312 | 1.9 |
| 2020 | 11 | 7 | 10 | 13.4 | 185 | 386 | 374 | 1006 | 17.1 | 309 | 2.2 |
| 2020 | 11 | 7 | 11 | 13.4 | 143 | 725 | 565 | 1006 | 18.2 | 303 | 2.4 |
| 2020 | 11 | 7 | 12 | 13   | 154 | 739 | 613 | 1005 | 18.8 | 301 | 2.8 |
| 2020 | 11 | 7 | 13 | 12.8 | 170 | 692 | 592 | 1005 | 19   | 302 | 3.3 |
| 2020 | 11 | 7 | 14 | 12.5 | 176 | 609 | 508 | 1005 | 18.7 | 304 | 3.6 |
| 2020 | 11 | 7 | 15 | 12.2 | 153 | 525 | 380 | 1005 | 17.9 | 307 | 3.6 |
| 2020 | 11 | 7 | 16 | 12.5 | 113 | 360 | 214 | 1005 | 16.5 | 308 | 2.6 |
| 2020 | 11 | 7 | 17 | 12.2 | 37  | 112 | 48  | 1006 | 13.3 | 310 | 1.4 |
| 2020 | 11 | 7 | 18 | 11   | 0   | 0   | 0   | 1006 | 11   | 313 | 1.4 |
| 2020 | 11 | 7 | 19 | 10.1 | 0   | 0   | 0   | 1007 | 10.1 | 315 | 1.4 |
| 2020 | 11 | 7 | 20 | 9.5  | 0   | 0   | 0   | 1007 | 9.5  | 316 | 1.4 |
| 2020 | 11 | 7 | 21 | 8.9  | 0   | 0   | 0   | 1008 | 8.9  | 316 | 1.4 |
| 2020 | 11 | 7 | 22 | 8.2  | 0   | 0   | 0   | 1008 | 8.2  | 315 | 1.3 |
| 2020 | 11 | 7 | 23 | 7.6  | 0   | 0   | 0   | 1008 | 7.6  | 310 | 1.3 |
| 2020 | 11 | 8 | 0  | 7.2  | 0   | 0   | 0   | 1008 | 7.2  | 306 | 1.3 |
| 2020 | 11 | 8 | 1  | 7    | 0   | 0   | 0   | 1008 | 7    | 305 | 1.4 |
| 2020 | 11 | 8 | 2  | 7.1  | 0   | 0   | 0   | 1008 | 7.1  | 308 | 1.5 |
| 2020 | 11 | 8 | 3  | 7.4  | 0   | 0   | 0   | 1008 | 7.4  | 318 | 1.6 |
| 2020 | 11 | 8 | 4  | 7.3  | 0   | 0   | 0   | 1008 | 7.3  | 326 | 1.7 |
| 2020 | 11 | 8 | 5  | 5.6  | 0   | 0   | 0   | 1008 | 7    | 330 | 1.7 |
| 2020 | 11 | 8 | 6  | 4.6  | 0   | 0   | 0   | 1008 | 6.6  | 328 | 1.7 |
| 2020 | 11 | 8 | 7  | 5.1  | 0   | 0   | 0   | 1009 | 7.2  | 335 | 1.9 |
| 2020 | 11 | 8 | 8  | 6.8  | 64  | 360 | 129 | 1009 | 10.4 | 349 | 3.3 |
| 2020 | 11 | 8 | 9  | 5.2  | 85  | 677 | 322 | 1010 | 11.4 | 355 | 4.6 |
| 2020 | 11 | 8 | 10 | 3.2  | 213 | 184 | 303 | 1010 | 12.1 | 350 | 5   |
| 2020 | 11 | 8 | 11 | 3.5  | 90  | 905 | 612 | 1010 | 13.1 | 339 | 5.1 |
| 2020 | 11 | 8 | 12 | 3.8  | 103 | 900 | 659 | 1010 | 13.9 | 331 | 5.4 |
| 2020 | 11 | 8 | 13 | 3.7  | 97  | 906 | 646 | 1009 | 13.9 | 328 | 5.8 |
| 2020 | 11 | 8 | 14 | 3.4  | 90  | 882 | 567 | 1009 | 13.3 | 327 | 5.9 |
| 2020 | 11 | 8 | 15 | 2.7  | 81  | 821 | 432 | 1010 | 12.2 | 328 | 5.8 |
| 2020 | 11 | 8 | 16 | 2.2  | 63  | 690 | 253 | 1010 | 10.9 | 329 | 5.1 |
| 2020 | 11 | 8 | 17 | 2.6  | 31  | 358 | 65  | 1011 | 8.5  | 331 | 3.8 |
| 2020 | 11 | 8 | 18 | 2.7  | 0   | 0   | 0   | 1011 | 6.7  | 334 | 3.3 |
| 2020 | 11 | 8 | 19 | 2.5  | 0   | 0   | 0   | 1012 | 6.1  | 336 | 3.3 |
| 2020 | 11 | 8 | 20 | 2.2  | 0   | 0   | 0   | 1012 | 5.6  | 338 | 3.4 |
| 2020 | 11 | 8 | 21 | 2    | 0   | 0   | 0   | 1012 | 5.2  | 340 | 3.3 |
| 2020 | 11 | 8 | 22 | 1.9  | 0   | 0   | 0   | 1012 | 4.6  | 343 | 3   |
| 2020 | 11 | 8 | 23 | 1.6  | 0   | 0   | 0   | 1012 | 3.9  | 346 | 2.5 |
| 2020 | 11 | 9 | 0  | 1.3  | 0   | 0   | 0   | 1012 | 3.5  | 350 | 2.4 |
| 2020 | 11 | 9 | 1  | 1    | 0   | 0   | 0   | 1012 | 3.2  | 355 | 2.6 |
| 2020 | 11 | 9 | 2  | 0.6  | 0   | 0   | 0   | 1013 | 2.7  | 359 | 2.6 |
| 2020 | 11 | 9 | 3  | 0.2  | 0   | 0   | 0   | 1013 | 2.1  | 3   | 2.5 |
| 2020 | 11 | 9 | 4  | -0.2 | 0   | 0   | 0   | 1013 | 1.7  | 8   | 2.5 |
| 2020 | 11 | 9 | 5  | -1   | 0   | 0   | 0   | 1013 | 1.2  | 12  | 2.5 |
| 2020 | 11 | 9 | 6  | -2.1 | 0   | 0   | 0   | 1013 | 0.4  | 15  | 2.1 |
| 2020 | 11 | 9 | 7  | -2.8 | 0   | 0   | 0   | 1013 | 0.1  | 17  | 1.9 |
| 2020 | 11 | 9 | 8  | -3.1 | 43  | 609 | 151 | 1014 | 3    | 17  | 2.8 |
| 2020 | 11 | 9 | 9  | -3.7 | 62  | 814 | 344 | 1014 | 5.6  | 8   | 3.6 |

|      |    |    |    |      |    |     |     |      |      |     |     |
|------|----|----|----|------|----|-----|-----|------|------|-----|-----|
| 2020 | 11 | 9  | 10 | -4   | 73 | 902 | 508 | 1014 | 7.7  | 1   | 4.1 |
| 2020 | 11 | 9  | 11 | -3.6 | 80 | 937 | 617 | 1013 | 9.2  | 357 | 4.2 |
| 2020 | 11 | 9  | 12 | -2.8 | 83 | 951 | 667 | 1013 | 10.1 | 355 | 4.3 |
| 2020 | 11 | 9  | 13 | -1.9 | 84 | 935 | 647 | 1012 | 10.7 | 352 | 4.2 |
| 2020 | 11 | 9  | 14 | -0.9 | 82 | 901 | 566 | 1012 | 10.9 | 349 | 4.1 |
| 2020 | 11 | 9  | 15 | -0.1 | 77 | 822 | 426 | 1012 | 10.6 | 345 | 3.7 |
| 2020 | 11 | 9  | 16 | 1.2  | 63 | 668 | 245 | 1012 | 9.6  | 341 | 2.6 |
| 2020 | 11 | 9  | 17 | 2.8  | 30 | 327 | 60  | 1012 | 6.4  | 338 | 1.2 |
| 2020 | 11 | 9  | 18 | 1.1  | 0  | 0   | 0   | 1012 | 4.8  | 336 | 1.2 |
| 2020 | 11 | 9  | 19 | 0.2  | 0  | 0   | 0   | 1013 | 5.1  | 330 | 1.1 |
| 2020 | 11 | 9  | 20 | -0.5 | 0  | 0   | 0   | 1013 | 5.4  | 315 | 0.9 |
| 2020 | 11 | 9  | 21 | -1   | 0  | 0   | 0   | 1013 | 5.5  | 277 | 0.8 |
| 2020 | 11 | 9  | 22 | -0.9 | 0  | 0   | 0   | 1013 | 4.9  | 246 | 1   |
| 2020 | 11 | 9  | 23 | -0.6 | 0  | 0   | 0   | 1013 | 4.3  | 242 | 1.1 |
| 2020 | 11 | 10 | 0  | 0.1  | 0  | 0   | 0   | 1013 | 4.2  | 254 | 1.3 |
| 2020 | 11 | 10 | 1  | 1    | 0  | 0   | 0   | 1013 | 4.6  | 267 | 1.3 |
| 2020 | 11 | 10 | 2  | 2.4  | 0  | 0   | 0   | 1013 | 5.1  | 281 | 1.4 |
| 2020 | 11 | 10 | 3  | 3.6  | 0  | 0   | 0   | 1013 | 5.5  | 298 | 1.4 |
| 2020 | 11 | 10 | 4  | 4.6  | 0  | 0   | 0   | 1013 | 5.3  | 322 | 1.4 |
| 2020 | 11 | 10 | 5  | 4.9  | 0  | 0   | 0   | 1013 | 4.9  | 347 | 1.5 |
| 2020 | 11 | 10 | 6  | 4.4  | 0  | 0   | 0   | 1013 | 4.4  | 7   | 1.6 |
| 2020 | 11 | 10 | 7  | 3.9  | 0  | 0   | 0   | 1014 | 3.9  | 19  | 1.7 |
| 2020 | 11 | 10 | 8  | 5    | 54 | 434 | 129 | 1015 | 6.8  | 24  | 2.7 |
| 2020 | 11 | 10 | 9  | 3.8  | 72 | 731 | 322 | 1015 | 9.1  | 22  | 3.2 |
| 2020 | 11 | 10 | 10 | 1.6  | 77 | 865 | 491 | 1015 | 10.9 | 16  | 3.5 |
| 2020 | 11 | 10 | 11 | 1    | 81 | 925 | 608 | 1015 | 11.8 | 5   | 3.5 |
| 2020 | 11 | 10 | 12 | 1.2  | 84 | 942 | 659 | 1015 | 12.3 | 355 | 3.6 |
| 2020 | 11 | 10 | 13 | 1.7  | 85 | 931 | 642 | 1015 | 12.6 | 349 | 3.7 |
| 2020 | 11 | 10 | 14 | 2.2  | 84 | 892 | 560 | 1014 | 12.6 | 346 | 3.7 |
| 2020 | 11 | 10 | 15 | 2.7  | 77 | 810 | 418 | 1015 | 12.1 | 346 | 3.7 |
| 2020 | 11 | 10 | 16 | 3.7  | 62 | 664 | 240 | 1015 | 10.9 | 347 | 3   |
| 2020 | 11 | 10 | 17 | 4.5  | 29 | 330 | 58  | 1015 | 7.7  | 349 | 1.6 |
| 2020 | 11 | 10 | 18 | 3.5  | 0  | 0   | 0   | 1016 | 5.7  | 353 | 1.5 |
| 2020 | 11 | 10 | 19 | 3.1  | 0  | 0   | 0   | 1016 | 5.1  | 356 | 1.4 |
| 2020 | 11 | 10 | 20 | 2.6  | 0  | 0   | 0   | 1016 | 4.5  | 1   | 1.4 |
| 2020 | 11 | 10 | 21 | 2.2  | 0  | 0   | 0   | 1017 | 3.9  | 5   | 1.3 |
| 2020 | 11 | 10 | 22 | 1.8  | 0  | 0   | 0   | 1017 | 3.5  | 10  | 1.3 |
| 2020 | 11 | 10 | 23 | 1.4  | 0  | 0   | 0   | 1017 | 3.1  | 14  | 1.3 |
| 2020 | 11 | 11 | 0  | 1    | 0  | 0   | 0   | 1017 | 2.8  | 17  | 1.3 |
| 2020 | 11 | 11 | 1  | 0.8  | 0  | 0   | 0   | 1017 | 2.5  | 21  | 1.3 |
| 2020 | 11 | 11 | 2  | 0.6  | 0  | 0   | 0   | 1017 | 2.3  | 25  | 1.3 |
| 2020 | 11 | 11 | 3  | 0.4  | 0  | 0   | 0   | 1017 | 2.1  | 29  | 1.3 |
| 2020 | 11 | 11 | 4  | 0.4  | 0  | 0   | 0   | 1017 | 1.9  | 33  | 1.3 |
| 2020 | 11 | 11 | 5  | 0.5  | 0  | 0   | 0   | 1018 | 1.8  | 37  | 1.3 |
| 2020 | 11 | 11 | 6  | 0.7  | 0  | 0   | 0   | 1018 | 1.8  | 40  | 1.3 |
| 2020 | 11 | 11 | 7  | 0.9  | 0  | 0   | 0   | 1018 | 2.1  | 45  | 1.3 |
| 2020 | 11 | 11 | 8  | 3.1  | 48 | 487 | 131 | 1019 | 5.6  | 48  | 1.3 |
| 2020 | 11 | 11 | 9  | 3.5  | 73 | 716 | 316 | 1019 | 8.4  | 48  | 1.7 |
| 2020 | 11 | 11 | 10 | 3.9  | 86 | 825 | 477 | 1019 | 11.4 | 40  | 2.4 |
| 2020 | 11 | 11 | 11 | 3.7  | 92 | 885 | 592 | 1019 | 13   | 38  | 2.4 |

|      |    |    |    |     |     |     |     |      |      |     |     |
|------|----|----|----|-----|-----|-----|-----|------|------|-----|-----|
| 2020 | 11 | 11 | 12 | 3.7 | 91  | 915 | 646 | 1019 | 14.1 | 37  | 2.1 |
| 2020 | 11 | 11 | 13 | 3.8 | 89  | 913 | 632 | 1018 | 14.8 | 37  | 1.9 |
| 2020 | 11 | 11 | 14 | 4   | 83  | 881 | 550 | 1017 | 15.1 | 37  | 1.6 |
| 2020 | 11 | 11 | 15 | 4.3 | 81  | 784 | 409 | 1017 | 14.9 | 40  | 1.4 |
| 2020 | 11 | 11 | 16 | 6.3 | 63  | 648 | 236 | 1017 | 14.1 | 45  | 0.8 |
| 2020 | 11 | 11 | 17 | 4.3 | 29  | 310 | 55  | 1018 | 11.9 | 51  | 0.7 |
| 2020 | 11 | 11 | 18 | 2.2 | 0   | 0   | 0   | 1018 | 11   | 70  | 0.8 |
| 2020 | 11 | 11 | 19 | 2   | 0   | 0   | 0   | 1018 | 9.9  | 98  | 0.9 |
| 2020 | 11 | 11 | 20 | 2   | 0   | 0   | 0   | 1019 | 8.3  | 114 | 1.1 |
| 2020 | 11 | 11 | 21 | 1.7 | 0   | 0   | 0   | 1019 | 7.1  | 121 | 1.2 |
| 2020 | 11 | 11 | 22 | 1.4 | 0   | 0   | 0   | 1019 | 6.1  | 121 | 1.3 |
| 2020 | 11 | 11 | 23 | 1.1 | 0   | 0   | 0   | 1019 | 5.6  | 118 | 1.3 |
| 2020 | 11 | 12 | 0  | 0.8 | 0   | 0   | 0   | 1019 | 5.2  | 113 | 1.3 |
| 2020 | 11 | 12 | 1  | 0.6 | 0   | 0   | 0   | 1019 | 5    | 106 | 1.3 |
| 2020 | 11 | 12 | 2  | 0.6 | 0   | 0   | 0   | 1019 | 4.7  | 99  | 1.3 |
| 2020 | 11 | 12 | 3  | 0.8 | 0   | 0   | 0   | 1018 | 4.4  | 91  | 1.3 |
| 2020 | 11 | 12 | 4  | 1.1 | 0   | 0   | 0   | 1018 | 4    | 85  | 1.4 |
| 2020 | 11 | 12 | 5  | 1.5 | 0   | 0   | 0   | 1018 | 3.6  | 81  | 1.4 |
| 2020 | 11 | 12 | 6  | 2   | 0   | 0   | 0   | 1018 | 3.4  | 78  | 1.4 |
| 2020 | 11 | 12 | 7  | 2.4 | 0   | 0   | 0   | 1019 | 3.5  | 77  | 1.3 |
| 2020 | 11 | 12 | 8  | 4.7 | 49  | 485 | 129 | 1019 | 6.8  | 76  | 1.2 |
| 2020 | 11 | 12 | 9  | 5.4 | 74  | 716 | 315 | 1018 | 9.9  | 77  | 1.9 |
| 2020 | 11 | 12 | 10 | 6.5 | 89  | 824 | 476 | 1018 | 12.9 | 80  | 1.7 |
| 2020 | 11 | 12 | 11 | 6.5 | 96  | 877 | 588 | 1017 | 14.6 | 78  | 1.4 |
| 2020 | 11 | 12 | 12 | 6.3 | 100 | 895 | 639 | 1017 | 15.8 | 67  | 1   |
| 2020 | 11 | 12 | 13 | 6.3 | 100 | 887 | 624 | 1016 | 16.5 | 50  | 0.6 |
| 2020 | 11 | 12 | 14 | 6.3 | 96  | 845 | 541 | 1016 | 16.7 | 12  | 0.5 |
| 2020 | 11 | 12 | 15 | 6.4 | 87  | 767 | 405 | 1015 | 16.4 | 338 | 0.5 |
| 2020 | 11 | 12 | 16 | 8.1 | 68  | 617 | 230 | 1015 | 15.4 | 327 | 0.5 |
| 2020 | 11 | 12 | 17 | 6.4 | 30  | 275 | 53  | 1015 | 12.9 | 323 | 0.8 |
| 2020 | 11 | 12 | 18 | 4.8 | 0   | 0   | 0   | 1015 | 11.2 | 330 | 1   |
| 2020 | 11 | 12 | 19 | 4.2 | 0   | 0   | 0   | 1016 | 9.9  | 342 | 1.1 |
| 2020 | 11 | 12 | 20 | 3.6 | 0   | 0   | 0   | 1016 | 8.8  | 353 | 1.2 |
| 2020 | 11 | 12 | 21 | 3.1 | 0   | 0   | 0   | 1016 | 7.6  | 3   | 1.2 |
| 2020 | 11 | 12 | 22 | 2.6 | 0   | 0   | 0   | 1016 | 6.5  | 11  | 1.3 |
| 2020 | 11 | 12 | 23 | 2.1 | 0   | 0   | 0   | 1016 | 5.6  | 20  | 1.3 |
| 2020 | 11 | 13 | 0  | 1.6 | 0   | 0   | 0   | 1016 | 5    | 26  | 1.3 |
| 2020 | 11 | 13 | 1  | 2.1 | 0   | 0   | 0   | 1016 | 5.1  | 28  | 1.3 |
| 2020 | 11 | 13 | 2  | 1.3 | 0   | 0   | 0   | 1015 | 4.3  | 27  | 1.3 |
| 2020 | 11 | 13 | 3  | 0.9 | 0   | 0   | 0   | 1015 | 3.7  | 24  | 1.4 |
| 2020 | 11 | 13 | 4  | 0.6 | 0   | 0   | 0   | 1015 | 3.3  | 22  | 1.4 |
| 2020 | 11 | 13 | 5  | 0.5 | 0   | 0   | 0   | 1015 | 3    | 21  | 1.5 |
| 2020 | 11 | 13 | 6  | 0.5 | 0   | 0   | 0   | 1015 | 2.7  | 22  | 1.5 |
| 2020 | 11 | 13 | 7  | 0.7 | 0   | 0   | 0   | 1016 | 2.9  | 22  | 1.4 |
| 2020 | 11 | 13 | 8  | 3.7 | 55  | 375 | 117 | 1016 | 6.7  | 21  | 1.6 |
| 2020 | 11 | 13 | 9  | 3.9 | 98  | 576 | 289 | 1016 | 9.9  | 18  | 2.4 |
| 2020 | 11 | 13 | 10 | 5.5 | 129 | 661 | 438 | 1016 | 12.4 | 10  | 2.4 |
| 2020 | 11 | 13 | 11 | 6.3 | 153 | 696 | 541 | 1016 | 14.8 | 13  | 2.8 |
| 2020 | 11 | 13 | 12 | 7.8 | 129 | 797 | 607 | 1015 | 16.1 | 8   | 2.8 |
| 2020 | 11 | 13 | 13 | 8.9 | 135 | 772 | 589 | 1014 | 16.9 | 2   | 2.9 |



|      |    |    |    |      |     |     |     |      |      |     |     |
|------|----|----|----|------|-----|-----|-----|------|------|-----|-----|
| 2020 | 11 | 13 | 14 | 9.8  | 136 | 708 | 507 | 1014 | 17   | 357 | 3   |
| 2020 | 11 | 13 | 15 | 10.4 | 131 | 577 | 368 | 1014 | 16.6 | 354 | 2.9 |
| 2020 | 11 | 13 | 16 | 11.3 | 99  | 383 | 199 | 1014 | 15.1 | 350 | 2.2 |
| 2020 | 11 | 13 | 17 | 10.3 | 29  | 97  | 37  | 1014 | 11.6 | 347 | 1.7 |
| 2020 | 11 | 13 | 18 | 9.6  | 0   | 0   | 0   | 1015 | 10   | 353 | 1.9 |
| 2020 | 11 | 13 | 19 | 9.4  | 0   | 0   | 0   | 1015 | 9.4  | 1   | 2   |
| 2020 | 11 | 13 | 20 | 8.6  | 0   | 0   | 0   | 1015 | 8.6  | 10  | 1.8 |
| 2020 | 11 | 13 | 21 | 7.8  | 0   | 0   | 0   | 1015 | 7.8  | 20  | 1.7 |
| 2020 | 11 | 13 | 22 | 7.2  | 0   | 0   | 0   | 1015 | 7.2  | 32  | 1.5 |
| 2020 | 11 | 13 | 23 | 6.6  | 0   | 0   | 0   | 1015 | 6.6  | 45  | 1.4 |
| 2020 | 11 | 14 | 0  | 6.2  | 0   | 0   | 0   | 1015 | 6.2  | 56  | 1.3 |
| 2020 | 11 | 14 | 1  | 5.9  | 0   | 0   | 0   | 1015 | 5.9  | 67  | 1.3 |
| 2020 | 11 | 14 | 2  | 5.8  | 0   | 0   | 0   | 1016 | 5.8  | 75  | 1.3 |
| 2020 | 11 | 14 | 3  | 5.7  | 0   | 0   | 0   | 1015 | 5.7  | 80  | 1.3 |
| 2020 | 11 | 14 | 4  | 5.5  | 0   | 0   | 0   | 1015 | 5.5  | 82  | 1.4 |
| 2020 | 11 | 14 | 5  | 5.3  | 0   | 0   | 0   | 1015 | 5.3  | 83  | 1.4 |
| 2020 | 11 | 14 | 6  | 5    | 0   | 0   | 0   | 1016 | 5    | 84  | 1.5 |
| 2020 | 11 | 14 | 7  | 5.1  | 0   | 0   | 0   | 1016 | 5.1  | 83  | 1.5 |
| 2020 | 11 | 14 | 8  | 7.2  | 60  | 309 | 109 | 1016 | 8.6  | 82  | 2   |
| 2020 | 11 | 14 | 9  | 8.2  | 104 | 554 | 286 | 1017 | 11.4 | 85  | 2.7 |
| 2020 | 11 | 14 | 10 | 8.6  | 127 | 682 | 443 | 1017 | 14.3 | 94  | 2.9 |
| 2020 | 11 | 14 | 11 | 8.6  | 139 | 749 | 554 | 1017 | 16   | 100 | 2.9 |
| 2020 | 11 | 14 | 12 | 8.6  | 134 | 800 | 610 | 1016 | 16.9 | 104 | 2.8 |
| 2020 | 11 | 14 | 13 | 8.7  | 131 | 797 | 596 | 1015 | 17.5 | 109 | 2.3 |
| 2020 | 11 | 14 | 14 | 8.9  | 121 | 761 | 517 | 1015 | 17.6 | 113 | 1.9 |
| 2020 | 11 | 14 | 15 | 9.4  | 119 | 631 | 377 | 1015 | 17.2 | 111 | 1.6 |
| 2020 | 11 | 14 | 16 | 11.4 | 93  | 258 | 160 | 1015 | 15.9 | 108 | 1.1 |
| 2020 | 11 | 14 | 17 | 9.9  | 31  | 146 | 42  | 1015 | 13.2 | 111 | 1   |
| 2020 | 11 | 14 | 18 | 8.9  | 0   | 0   | 0   | 1015 | 11.9 | 113 | 1.1 |
| 2020 | 11 | 14 | 19 | 8.7  | 0   | 0   | 0   | 1015 | 11   | 115 | 1.2 |
| 2020 | 11 | 14 | 20 | 8.4  | 0   | 0   | 0   | 1015 | 9.9  | 116 | 1.2 |
| 2020 | 11 | 14 | 21 | 8.3  | 0   | 0   | 0   | 1015 | 8.8  | 115 | 1.3 |
| 2020 | 11 | 14 | 22 | 8    | 0   | 0   | 0   | 1015 | 8    | 110 | 1.3 |
| 2020 | 11 | 14 | 23 | 7.7  | 0   | 0   | 0   | 1015 | 7.7  | 104 | 1.2 |
| 2020 | 11 | 15 | 0  | 7.3  | 0   | 0   | 0   | 1015 | 7.3  | 97  | 1.2 |
| 2020 | 11 | 15 | 1  | 6.9  | 0   | 0   | 0   | 1015 | 6.9  | 92  | 1.3 |
| 2020 | 11 | 15 | 2  | 6.7  | 0   | 0   | 0   | 1015 | 6.7  | 90  | 1.3 |
| 2020 | 11 | 15 | 3  | 6.6  | 0   | 0   | 0   | 1015 | 6.6  | 89  | 1.3 |
| 2020 | 11 | 15 | 4  | 6.5  | 0   | 0   | 0   | 1015 | 6.5  | 88  | 1.3 |
| 2020 | 11 | 15 | 5  | 6.6  | 0   | 0   | 0   | 1015 | 6.6  | 86  | 1.2 |
| 2020 | 11 | 15 | 6  | 6.6  | 0   | 0   | 0   | 1015 | 6.6  | 85  | 1.2 |
| 2020 | 11 | 15 | 7  | 6.7  | 0   | 0   | 0   | 1016 | 6.9  | 85  | 1.2 |
| 2020 | 11 | 15 | 8  | 8.1  | 55  | 16  | 57  | 1016 | 9.5  | 85  | 1.1 |
| 2020 | 11 | 15 | 9  | 8.5  | 85  | 644 | 294 | 1016 | 12   | 89  | 1.8 |
| 2020 | 11 | 15 | 10 | 8.4  | 104 | 755 | 451 | 1016 | 14.3 | 98  | 1.4 |
| 2020 | 11 | 15 | 11 | 7.8  | 115 | 810 | 561 | 1015 | 15.8 | 117 | 0.8 |
| 2020 | 11 | 15 | 12 | 8    | 111 | 854 | 616 | 1015 | 16.8 | 183 | 0.5 |
| 2020 | 11 | 15 | 13 | 8.3  | 106 | 859 | 604 | 1014 | 17.3 | 233 | 0.9 |
| 2020 | 11 | 15 | 14 | 8.5  | 100 | 825 | 527 | 1013 | 17.4 | 252 | 1.3 |
| 2020 | 11 | 15 | 15 | 8.7  | 87  | 752 | 392 | 1013 | 17   | 267 | 1.4 |

|      |    |    |    |      |     |     |     |      |      |     |     |
|------|----|----|----|------|-----|-----|-----|------|------|-----|-----|
| 2020 | 11 | 15 | 16 | 10.2 | 68  | 595 | 220 | 1013 | 15.9 | 282 | 0.9 |
| 2020 | 11 | 15 | 17 | 8.7  | 29  | 236 | 47  | 1013 | 13.2 | 307 | 0.9 |
| 2020 | 11 | 15 | 18 | 7    | 0   | 0   | 0   | 1013 | 11.7 | 331 | 1.1 |
| 2020 | 11 | 15 | 19 | 6.5  | 0   | 0   | 0   | 1013 | 10.5 | 355 | 1.1 |
| 2020 | 11 | 15 | 20 | 6.2  | 0   | 0   | 0   | 1014 | 9.4  | 15  | 1.2 |
| 2020 | 11 | 15 | 21 | 6    | 0   | 0   | 0   | 1014 | 8.6  | 30  | 1.2 |
| 2020 | 11 | 15 | 22 | 5.7  | 0   | 0   | 0   | 1014 | 8    | 39  | 1.2 |
| 2020 | 11 | 15 | 23 | 5.3  | 0   | 0   | 0   | 1013 | 7.4  | 44  | 1.2 |
| 2020 | 11 | 16 | 0  | 5    | 0   | 0   | 0   | 1013 | 7.1  | 45  | 1.2 |
| 2020 | 11 | 16 | 1  | 4.9  | 0   | 0   | 0   | 1013 | 7.1  | 43  | 1.2 |
| 2020 | 11 | 16 | 2  | 5.3  | 0   | 0   | 0   | 1013 | 7.5  | 39  | 1.2 |
| 2020 | 11 | 16 | 3  | 5.5  | 0   | 0   | 0   | 1013 | 7.6  | 34  | 1.3 |
| 2020 | 11 | 16 | 4  | 5.6  | 0   | 0   | 0   | 1013 | 7.6  | 30  | 1.3 |
| 2020 | 11 | 16 | 5  | 5.6  | 0   | 0   | 0   | 1013 | 7.5  | 29  | 1.4 |
| 2020 | 11 | 16 | 6  | 5.7  | 0   | 0   | 0   | 1013 | 7.3  | 32  | 1.4 |
| 2020 | 11 | 16 | 7  | 5.7  | 0   | 0   | 0   | 1013 | 7.2  | 38  | 1.4 |
| 2020 | 11 | 16 | 8  | 6.9  | 55  | 95  | 70  | 1013 | 9.3  | 46  | 1.5 |
| 2020 | 11 | 16 | 9  | 6.9  | 91  | 595 | 282 | 1013 | 11.4 | 57  | 2.2 |
| 2020 | 11 | 16 | 10 | 8    | 113 | 709 | 436 | 1013 | 13.2 | 69  | 1.9 |
| 2020 | 11 | 16 | 11 | 7.4  | 124 | 769 | 544 | 1013 | 15.9 | 87  | 1.9 |
| 2020 | 11 | 16 | 12 | 6.8  | 122 | 808 | 597 | 1012 | 17.7 | 104 | 1.8 |
| 2020 | 11 | 16 | 13 | 7    | 122 | 798 | 583 | 1011 | 18.5 | 116 | 1.6 |
| 2020 | 11 | 16 | 14 | 7.7  | 116 | 755 | 504 | 1011 | 18.5 | 120 | 1.2 |
| 2020 | 11 | 16 | 15 | 9    | 167 | 223 | 256 | 1011 | 17.7 | 121 | 1   |
| 2020 | 11 | 16 | 16 | 10.8 | 80  | 484 | 203 | 1011 | 15.9 | 117 | 0.8 |
| 2020 | 11 | 16 | 17 | 8.8  | 28  | 157 | 40  | 1011 | 13.9 | 115 | 1   |
| 2020 | 11 | 16 | 18 | 8.5  | 0   | 0   | 0   | 1012 | 12.6 | 108 | 1.1 |
| 2020 | 11 | 16 | 19 | 8.3  | 0   | 0   | 0   | 1012 | 11.6 | 102 | 1.3 |
| 2020 | 11 | 16 | 20 | 7.9  | 0   | 0   | 0   | 1012 | 10.8 | 101 | 1.6 |
| 2020 | 11 | 16 | 21 | 8    | 0   | 0   | 0   | 1012 | 10.3 | 104 | 1.8 |
| 2020 | 11 | 16 | 22 | 9    | 0   | 0   | 0   | 1012 | 10.6 | 107 | 2.2 |
| 2020 | 11 | 16 | 23 | 9.8  | 0   | 0   | 0   | 1012 | 10.8 | 108 | 2.4 |
| 2020 | 11 | 17 | 0  | 10.4 | 0   | 0   | 0   | 1012 | 11.1 | 108 | 2.7 |
| 2020 | 11 | 17 | 1  | 10.8 | 0   | 0   | 0   | 1012 | 11.6 | 108 | 3.1 |
| 2020 | 11 | 17 | 2  | 10.8 | 0   | 0   | 0   | 1012 | 11.6 | 106 | 3   |
| 2020 | 11 | 17 | 3  | 10.7 | 0   | 0   | 0   | 1012 | 11.7 | 104 | 3   |
| 2020 | 11 | 17 | 4  | 10.6 | 0   | 0   | 0   | 1012 | 11.5 | 104 | 2.8 |
| 2020 | 11 | 17 | 5  | 10.7 | 0   | 0   | 0   | 1012 | 11.4 | 106 | 2.7 |
| 2020 | 11 | 17 | 6  | 10.8 | 0   | 0   | 0   | 1012 | 11.4 | 108 | 2.6 |
| 2020 | 11 | 17 | 7  | 11.1 | 0   | 0   | 0   | 1012 | 11.6 | 109 | 2.6 |
| 2020 | 11 | 17 | 8  | 12.3 | 20  | 0   | 20  | 1012 | 13.1 | 109 | 3.3 |
| 2020 | 11 | 17 | 9  | 13.6 | 129 | 142 | 174 | 1012 | 14.8 | 110 | 3.6 |
| 2020 | 11 | 17 | 10 | 14.8 | 149 | 551 | 398 | 1012 | 17   | 116 | 3.7 |
| 2020 | 11 | 17 | 11 | 15.4 | 132 | 0   | 132 | 1012 | 18.7 | 124 | 3.8 |
| 2020 | 11 | 17 | 12 | 15.8 | 256 | 297 | 429 | 1011 | 19.9 | 132 | 3.8 |
| 2020 | 11 | 17 | 13 | 16.1 | 236 | 362 | 443 | 1010 | 20.6 | 135 | 3.7 |
| 2020 | 11 | 17 | 14 | 16.3 | 149 | 625 | 468 | 1009 | 20.7 | 137 | 3.5 |
| 2020 | 11 | 17 | 15 | 16.3 | 166 | 70  | 194 | 1009 | 20.4 | 139 | 3.1 |
| 2020 | 11 | 17 | 16 | 16.8 | 19  | 0   | 19  | 1010 | 19.2 | 134 | 2   |
| 2020 | 11 | 17 | 17 | 15.4 | 5   | 0   | 5   | 1010 | 16.2 | 124 | 1.3 |

|      |    |    |    |      |     |     |     |      |      |     |     |
|------|----|----|----|------|-----|-----|-----|------|------|-----|-----|
| 2020 | 11 | 17 | 18 | 14.5 | 0   | 0   | 0   | 1010 | 14.8 | 120 | 1.4 |
| 2020 | 11 | 17 | 19 | 14.1 | 0   | 0   | 0   | 1010 | 14.3 | 119 | 1.6 |
| 2020 | 11 | 17 | 20 | 13.9 | 0   | 0   | 0   | 1010 | 14   | 120 | 1.8 |
| 2020 | 11 | 17 | 21 | 13.8 | 0   | 0   | 0   | 1010 | 14   | 120 | 2.1 |
| 2020 | 11 | 17 | 22 | 13.9 | 0   | 0   | 0   | 1010 | 14   | 118 | 2.6 |
| 2020 | 11 | 17 | 23 | 14   | 0   | 0   | 0   | 1009 | 14.1 | 116 | 3.1 |
| 2020 | 11 | 18 | 0  | 14   | 0   | 0   | 0   | 1009 | 14   | 117 | 3.2 |
| 2020 | 11 | 18 | 1  | 13.9 | 0   | 0   | 0   | 1009 | 13.9 | 121 | 2.8 |
| 2020 | 11 | 18 | 2  | 14.2 | 0   | 0   | 0   | 1009 | 14.2 | 124 | 3   |
| 2020 | 11 | 18 | 3  | 14.4 | 0   | 0   | 0   | 1008 | 14.4 | 124 | 2.6 |
| 2020 | 11 | 18 | 4  | 14.7 | 0   | 0   | 0   | 1008 | 14.7 | 126 | 2.6 |
| 2020 | 11 | 18 | 5  | 15   | 0   | 0   | 0   | 1008 | 15   | 135 | 2.5 |
| 2020 | 11 | 18 | 6  | 15.5 | 0   | 0   | 0   | 1008 | 15.5 | 141 | 2.5 |
| 2020 | 11 | 18 | 7  | 16.2 | 0   | 0   | 0   | 1007 | 16.3 | 143 | 2.8 |
| 2020 | 11 | 18 | 8  | 17.4 | 48  | 0   | 48  | 1007 | 17.7 | 139 | 3.7 |
| 2020 | 11 | 18 | 9  | 18.4 | 47  | 0   | 47  | 1007 | 18.9 | 134 | 4.1 |
| 2020 | 11 | 18 | 10 | 19.1 | 195 | 125 | 251 | 1006 | 19.8 | 134 | 4.3 |
| 2020 | 11 | 18 | 11 | 19   | 239 | 239 | 368 | 1006 | 20.3 | 141 | 4.6 |
| 2020 | 11 | 18 | 12 | 18.8 | 249 | 322 | 437 | 1005 | 20.3 | 145 | 4.5 |
| 2020 | 11 | 18 | 13 | 18.8 | 47  | 0   | 47  | 1004 | 20.4 | 150 | 4   |
| 2020 | 11 | 18 | 14 | 18.8 | 22  | 0   | 22  | 1004 | 20.3 | 151 | 3.9 |
| 2020 | 11 | 18 | 15 | 18.7 | 97  | 0   | 97  | 1003 | 19.9 | 148 | 4.1 |
| 2020 | 11 | 18 | 16 | 18.7 | 32  | 0   | 32  | 1003 | 19.6 | 149 | 4.2 |
| 2020 | 11 | 18 | 17 | 18.5 | 4   | 0   | 4   | 1002 | 19.1 | 148 | 4   |
| 2020 | 11 | 18 | 18 | 18.4 | 0   | 0   | 0   | 1002 | 18.7 | 144 | 4   |
| 2020 | 11 | 18 | 19 | 18.4 | 0   | 0   | 0   | 1002 | 18.6 | 144 | 4.2 |
| 2020 | 11 | 18 | 20 | 18.5 | 0   | 0   | 0   | 1002 | 18.8 | 150 | 4.6 |
| 2020 | 11 | 18 | 21 | 18.6 | 0   | 0   | 0   | 1001 | 18.9 | 156 | 5   |
| 2020 | 11 | 18 | 22 | 18.7 | 0   | 0   | 0   | 1001 | 19   | 162 | 4.9 |
| 2020 | 11 | 18 | 23 | 18.9 | 0   | 0   | 0   | 1001 | 19.2 | 167 | 4.8 |
| 2020 | 11 | 19 | 0  | 19.1 | 0   | 0   | 0   | 1000 | 19.4 | 168 | 5.1 |
| 2020 | 11 | 19 | 1  | 19.3 | 0   | 0   | 0   | 999  | 19.6 | 172 | 5.2 |
| 2020 | 11 | 19 | 2  | 19.4 | 0   | 0   | 0   | 999  | 19.7 | 179 | 5.7 |
| 2020 | 11 | 19 | 3  | 19.5 | 0   | 0   | 0   | 998  | 19.9 | 185 | 6.2 |
| 2020 | 11 | 19 | 4  | 19.5 | 0   | 0   | 0   | 998  | 19.9 | 188 | 6.4 |
| 2020 | 11 | 19 | 5  | 19.4 | 0   | 0   | 0   | 997  | 19.8 | 189 | 6.3 |
| 2020 | 11 | 19 | 6  | 19.4 | 0   | 0   | 0   | 997  | 19.7 | 192 | 6.2 |
| 2020 | 11 | 19 | 7  | 19.5 | 0   | 0   | 0   | 997  | 19.8 | 195 | 6.2 |
| 2020 | 11 | 19 | 8  | 19.8 | 7   | 0   | 7   | 997  | 20.1 | 197 | 6.2 |
| 2020 | 11 | 19 | 9  | 20.3 | 55  | 0   | 55  | 997  | 20.7 | 199 | 6.2 |
| 2020 | 11 | 19 | 10 | 20.8 | 29  | 0   | 29  | 996  | 21.4 | 203 | 6.2 |
| 2020 | 11 | 19 | 11 | 21   | 71  | 0   | 71  | 996  | 22   | 209 | 6.5 |
| 2020 | 11 | 19 | 12 | 20.7 | 32  | 0   | 32  | 995  | 22   | 226 | 6.7 |
| 2020 | 11 | 19 | 13 | 18.7 | 46  | 0   | 46  | 996  | 20.3 | 260 | 6.5 |
| 2020 | 11 | 19 | 14 | 15.6 | 39  | 0   | 39  | 997  | 17.4 | 284 | 5.7 |
| 2020 | 11 | 19 | 15 | 14.8 | 18  | 0   | 18  | 997  | 16.3 | 298 | 4.7 |
| 2020 | 11 | 19 | 16 | 14.3 | 61  | 0   | 61  | 998  | 15.5 | 312 | 4.2 |
| 2020 | 11 | 19 | 17 | 13.7 | 15  | 0   | 15  | 998  | 14.5 | 326 | 4   |
| 2020 | 11 | 19 | 18 | 12.5 | 0   | 0   | 0   | 999  | 13.5 | 333 | 4   |
| 2020 | 11 | 19 | 19 | 11.3 | 0   | 0   | 0   | 1000 | 12.4 | 335 | 3.9 |

|      |    |    |    |      |     |     |     |      |      |     |     |
|------|----|----|----|------|-----|-----|-----|------|------|-----|-----|
| 2020 | 11 | 19 | 20 | 10.4 | 0   | 0   | 0   | 1001 | 11.7 | 332 | 3.7 |
| 2020 | 11 | 19 | 21 | 9.7  | 0   | 0   | 0   | 1001 | 11.3 | 330 | 3.3 |
| 2020 | 11 | 19 | 22 | 9.2  | 0   | 0   | 0   | 1002 | 11.2 | 327 | 3.3 |
| 2020 | 11 | 19 | 23 | 8.9  | 0   | 0   | 0   | 1002 | 10.8 | 326 | 3.4 |
| 2020 | 11 | 20 | 0  | 8.6  | 0   | 0   | 0   | 1002 | 10.6 | 323 | 3.5 |
| 2020 | 11 | 20 | 1  | 8.2  | 0   | 0   | 0   | 1002 | 10.3 | 323 | 3.6 |
| 2020 | 11 | 20 | 2  | 7.8  | 0   | 0   | 0   | 1002 | 10   | 324 | 3.7 |
| 2020 | 11 | 20 | 3  | 7.3  | 0   | 0   | 0   | 1002 | 9.7  | 328 | 4.2 |
| 2020 | 11 | 20 | 4  | 6.7  | 0   | 0   | 0   | 1002 | 9.3  | 328 | 4.6 |
| 2020 | 11 | 20 | 5  | 6.2  | 0   | 0   | 0   | 1003 | 8.8  | 329 | 4.5 |
| 2020 | 11 | 20 | 6  | 5.7  | 0   | 0   | 0   | 1003 | 8.1  | 330 | 4.2 |
| 2020 | 11 | 20 | 7  | 5.4  | 0   | 0   | 0   | 1004 | 7.7  | 326 | 4.1 |
| 2020 | 11 | 20 | 8  | 4.8  | 21  | 0   | 21  | 1005 | 8    | 324 | 4.8 |
| 2020 | 11 | 20 | 9  | 4.1  | 56  | 0   | 56  | 1005 | 8.2  | 321 | 5.5 |
| 2020 | 11 | 20 | 10 | 3.9  | 40  | 0   | 40  | 1005 | 8.5  | 320 | 5.8 |
| 2020 | 11 | 20 | 11 | 3.8  | 46  | 0   | 46  | 1005 | 8.9  | 320 | 6.1 |
| 2020 | 11 | 20 | 12 | 3.7  | 51  | 0   | 51  | 1005 | 9.1  | 323 | 6.4 |
| 2020 | 11 | 20 | 13 | 3.5  | 76  | 0   | 76  | 1005 | 9.2  | 323 | 6.3 |
| 2020 | 11 | 20 | 14 | 3.3  | 49  | 0   | 49  | 1005 | 9    | 324 | 6.1 |
| 2020 | 11 | 20 | 15 | 3.2  | 32  | 0   | 32  | 1006 | 8.3  | 327 | 5.9 |
| 2020 | 11 | 20 | 16 | 3.2  | 24  | 0   | 24  | 1006 | 7.5  | 331 | 5.4 |
| 2020 | 11 | 20 | 17 | 3.3  | 6   | 0   | 6   | 1007 | 6.7  | 335 | 4.6 |
| 2020 | 11 | 20 | 18 | 3.5  | 0   | 0   | 0   | 1007 | 6.2  | 339 | 4.2 |
| 2020 | 11 | 20 | 19 | 3.3  | 0   | 0   | 0   | 1008 | 6    | 344 | 4.2 |
| 2020 | 11 | 20 | 20 | 3.3  | 0   | 0   | 0   | 1008 | 5.7  | 348 | 3.8 |
| 2020 | 11 | 20 | 21 | 3.1  | 0   | 0   | 0   | 1008 | 5    | 355 | 3.4 |
| 2020 | 11 | 20 | 22 | 2.7  | 0   | 0   | 0   | 1009 | 4.4  | 359 | 3.1 |
| 2020 | 11 | 20 | 23 | 2.2  | 0   | 0   | 0   | 1009 | 3.8  | 4   | 2.7 |
| 2020 | 11 | 21 | 0  | 1.5  | 0   | 0   | 0   | 1009 | 2.7  | 7   | 2.3 |
| 2020 | 11 | 21 | 1  | 0.7  | 0   | 0   | 0   | 1010 | 1.6  | 11  | 2.4 |
| 2020 | 11 | 21 | 2  | -0.2 | 0   | 0   | 0   | 1010 | 0.6  | 18  | 2.2 |
| 2020 | 11 | 21 | 3  | -1   | 0   | 0   | 0   | 1009 | -0.2 | 23  | 2   |
| 2020 | 11 | 21 | 4  | -1.5 | 0   | 0   | 0   | 1009 | -1.1 | 35  | 1.4 |
| 2020 | 11 | 21 | 5  | -1.7 | 0   | 0   | 0   | 1010 | -1.7 | 55  | 1   |
| 2020 | 11 | 21 | 6  | -1.9 | 0   | 0   | 0   | 1010 | -1.9 | 81  | 0.9 |
| 2020 | 11 | 21 | 7  | -1.8 | 0   | 0   | 0   | 1011 | -1.8 | 99  | 1   |
| 2020 | 11 | 21 | 8  | -0.6 | 42  | 467 | 105 | 1011 | 1.6  | 107 | 2.1 |
| 2020 | 11 | 21 | 9  | 0.9  | 70  | 721 | 289 | 1011 | 4.7  | 109 | 2.7 |
| 2020 | 11 | 21 | 10 | 2.7  | 84  | 836 | 450 | 1011 | 8.4  | 112 | 3.8 |
| 2020 | 11 | 21 | 11 | 4.2  | 93  | 881 | 559 | 1011 | 10.8 | 118 | 4.4 |
| 2020 | 11 | 21 | 12 | 5.5  | 98  | 890 | 606 | 1010 | 12.3 | 121 | 4.5 |
| 2020 | 11 | 21 | 13 | 6.6  | 101 | 865 | 586 | 1009 | 13.2 | 124 | 4.4 |
| 2020 | 11 | 21 | 14 | 7.4  | 101 | 806 | 503 | 1009 | 13.7 | 128 | 3.9 |
| 2020 | 11 | 21 | 15 | 8.2  | 148 | 325 | 275 | 1009 | 13.6 | 131 | 3   |
| 2020 | 11 | 21 | 16 | 9.7  | 62  | 0   | 62  | 1009 | 12.7 | 130 | 1.4 |
| 2020 | 11 | 21 | 17 | 8.7  | 23  | 0   | 23  | 1009 | 10.9 | 123 | 0.9 |
| 2020 | 11 | 21 | 18 | 8.7  | 0   | 0   | 0   | 1009 | 10.7 | 107 | 1   |
| 2020 | 11 | 21 | 19 | 8.7  | 0   | 0   | 0   | 1010 | 10.4 | 98  | 1   |
| 2020 | 11 | 21 | 20 | 8.5  | 0   | 0   | 0   | 1010 | 10   | 90  | 1   |
| 2020 | 11 | 21 | 21 | 8.1  | 0   | 0   | 0   | 1009 | 9.6  | 86  | 1.2 |

|      |    |    |    |      |     |     |     |      |      |     |     |
|------|----|----|----|------|-----|-----|-----|------|------|-----|-----|
| 2020 | 11 | 21 | 22 | 7.6  | 0   | 0   | 0   | 1009 | 9    | 89  | 1.3 |
| 2020 | 11 | 21 | 23 | 7.2  | 0   | 0   | 0   | 1009 | 8.6  | 93  | 1.4 |
| 2020 | 11 | 22 | 0  | 7    | 0   | 0   | 0   | 1009 | 8.3  | 93  | 1.4 |
| 2020 | 11 | 22 | 1  | 6.8  | 0   | 0   | 0   | 1008 | 8    | 91  | 1.3 |
| 2020 | 11 | 22 | 2  | 6.8  | 0   | 0   | 0   | 1008 | 8    | 90  | 1.2 |
| 2020 | 11 | 22 | 3  | 6.9  | 0   | 0   | 0   | 1008 | 8    | 88  | 1.1 |
| 2020 | 11 | 22 | 4  | 6.8  | 0   | 0   | 0   | 1007 | 7.8  | 73  | 0.9 |
| 2020 | 11 | 22 | 5  | 6.9  | 0   | 0   | 0   | 1007 | 7.7  | 30  | 0.8 |
| 2020 | 11 | 22 | 6  | 7    | 0   | 0   | 0   | 1008 | 7.9  | 349 | 1.5 |
| 2020 | 11 | 22 | 7  | 7.3  | 0   | 0   | 0   | 1009 | 7.8  | 345 | 1.9 |
| 2020 | 11 | 22 | 8  | 7.9  | 31  | 0   | 31  | 1009 | 8.7  | 4   | 2.4 |
| 2020 | 11 | 22 | 9  | 8.4  | 106 | 4   | 107 | 1008 | 9.8  | 7   | 2.9 |
| 2020 | 11 | 22 | 10 | 8.5  | 188 | 145 | 251 | 1008 | 11   | 357 | 3.1 |
| 2020 | 11 | 22 | 11 | 8.7  | 43  | 0   | 43  | 1008 | 12   | 340 | 3.6 |
| 2020 | 11 | 22 | 12 | 8.8  | 90  | 0   | 90  | 1008 | 12.7 | 332 | 4.4 |
| 2020 | 11 | 22 | 13 | 8.4  | 121 | 0   | 121 | 1008 | 12.2 | 328 | 5   |
| 2020 | 11 | 22 | 14 | 7.7  | 40  | 0   | 40  | 1008 | 11.3 | 326 | 5.2 |
| 2020 | 11 | 22 | 15 | 7    | 27  | 0   | 27  | 1009 | 10.4 | 325 | 5   |
| 2020 | 11 | 22 | 16 | 6.7  | 14  | 0   | 14  | 1009 | 9.5  | 326 | 4.5 |
| 2020 | 11 | 22 | 17 | 6.7  | 3   | 0   | 3   | 1010 | 8.6  | 327 | 3.9 |
| 2020 | 11 | 22 | 18 | 6.3  | 0   | 0   | 0   | 1010 | 8.1  | 327 | 4   |
| 2020 | 11 | 22 | 19 | 5.6  | 0   | 0   | 0   | 1011 | 7.6  | 326 | 4.2 |
| 2020 | 11 | 22 | 20 | 4.9  | 0   | 0   | 0   | 1012 | 7.1  | 326 | 4.6 |
| 2020 | 11 | 22 | 21 | 4.4  | 0   | 0   | 0   | 1012 | 6.5  | 329 | 4.5 |
| 2020 | 11 | 22 | 22 | 3.6  | 0   | 0   | 0   | 1012 | 5.8  | 332 | 4.4 |
| 2020 | 11 | 22 | 23 | 2.9  | 0   | 0   | 0   | 1012 | 5.4  | 334 | 4.3 |
| 2020 | 11 | 23 | 0  | 2.3  | 0   | 0   | 0   | 1012 | 5.2  | 336 | 4.3 |
| 2020 | 11 | 23 | 1  | 1.8  | 0   | 0   | 0   | 1013 | 4.9  | 337 | 4.1 |
| 2020 | 11 | 23 | 2  | 1.6  | 0   | 0   | 0   | 1013 | 4.8  | 340 | 4.2 |
| 2020 | 11 | 23 | 3  | 1.6  | 0   | 0   | 0   | 1013 | 4.8  | 344 | 4   |
| 2020 | 11 | 23 | 4  | 1.6  | 0   | 0   | 0   | 1013 | 4.6  | 346 | 3.9 |
| 2020 | 11 | 23 | 5  | 1.5  | 0   | 0   | 0   | 1013 | 4.3  | 350 | 3.7 |
| 2020 | 11 | 23 | 6  | 1.3  | 0   | 0   | 0   | 1014 | 3.6  | 355 | 3.3 |
| 2020 | 11 | 23 | 7  | 1    | 0   | 0   | 0   | 1014 | 2.8  | 0   | 2.7 |
| 2020 | 11 | 23 | 8  | 0.8  | 12  | 0   | 12  | 1015 | 3.4  | 1   | 3.2 |
| 2020 | 11 | 23 | 9  | 0.3  | 40  | 0   | 40  | 1015 | 5    | 354 | 3.9 |
| 2020 | 11 | 23 | 10 | 0.5  | 132 | 0   | 132 | 1015 | 6.4  | 347 | 4.1 |
| 2020 | 11 | 23 | 11 | 0.8  | 134 | 0   | 134 | 1014 | 7.6  | 342 | 4.1 |
| 2020 | 11 | 23 | 12 | 1.1  | 221 | 28  | 237 | 1013 | 8.5  | 337 | 4.1 |
| 2020 | 11 | 23 | 13 | 1.1  | 105 | 846 | 575 | 1013 | 9    | 332 | 4.4 |
| 2020 | 11 | 23 | 14 | 0.9  | 101 | 805 | 499 | 1013 | 8.9  | 333 | 4.6 |
| 2020 | 11 | 23 | 15 | 0.4  | 89  | 723 | 368 | 1013 | 8.1  | 339 | 4.6 |
| 2020 | 11 | 23 | 16 | 0.2  | 66  | 564 | 201 | 1013 | 6.8  | 344 | 4.1 |
| 2020 | 11 | 23 | 17 | 0.5  | 24  | 199 | 36  | 1013 | 4.2  | 349 | 2.7 |
| 2020 | 11 | 23 | 18 | 0.3  | 0   | 0   | 0   | 1014 | 2.8  | 352 | 2.4 |
| 2020 | 11 | 23 | 19 | -0.1 | 0   | 0   | 0   | 1014 | 2.1  | 355 | 2.5 |
| 2020 | 11 | 23 | 20 | -0.5 | 0   | 0   | 0   | 1014 | 1.5  | 1   | 2.4 |
| 2020 | 11 | 23 | 21 | -1   | 0   | 0   | 0   | 1014 | 0.9  | 4   | 2.1 |
| 2020 | 11 | 23 | 22 | -1.4 | 0   | 0   | 0   | 1015 | 0.4  | 6   | 2   |
| 2020 | 11 | 23 | 23 | -1.8 | 0   | 0   | 0   | 1015 | 0    | 5   | 1.9 |

|      |    |    |    |      |     |     |     |      |      |     |     |
|------|----|----|----|------|-----|-----|-----|------|------|-----|-----|
| 2020 | 11 | 24 | 0  | -2.1 | 0   | 0   | 0   | 1015 | -0.2 | 9   | 1.8 |
| 2020 | 11 | 24 | 1  | -2.1 | 0   | 0   | 0   | 1014 | 0.5  | 11  | 2.2 |
| 2020 | 11 | 24 | 2  | -2.2 | 0   | 0   | 0   | 1014 | 0.5  | 13  | 2.1 |
| 2020 | 11 | 24 | 3  | -2.4 | 0   | 0   | 0   | 1014 | 0.2  | 12  | 2   |
| 2020 | 11 | 24 | 4  | -2.7 | 0   | 0   | 0   | 1014 | 0.1  | 8   | 2.1 |
| 2020 | 11 | 24 | 5  | -3.1 | 0   | 0   | 0   | 1014 | -0.1 | 8   | 2.1 |
| 2020 | 11 | 24 | 6  | -3.3 | 0   | 0   | 0   | 1015 | -0.1 | 9   | 2.1 |
| 2020 | 11 | 24 | 7  | -3.4 | 0   | 0   | 0   | 1015 | -0.3 | 10  | 2   |
| 2020 | 11 | 24 | 8  | -3.9 | 45  | 45  | 50  | 1015 | 1.1  | 9   | 2.7 |
| 2020 | 11 | 24 | 9  | -3.8 | 69  | 677 | 268 | 1015 | 3.1  | 10  | 2.7 |
| 2020 | 11 | 24 | 10 | -4.8 | 179 | 71  | 210 | 1015 | 5.7  | 13  | 2.7 |
| 2020 | 11 | 24 | 11 | -4.7 | 234 | 137 | 305 | 1014 | 7.7  | 6   | 2.4 |
| 2020 | 11 | 24 | 12 | -4   | 102 | 873 | 592 | 1014 | 9    | 352 | 2.5 |
| 2020 | 11 | 24 | 13 | -3.3 | 99  | 872 | 581 | 1013 | 9.6  | 339 | 2.9 |
| 2020 | 11 | 24 | 14 | -2.8 | 94  | 835 | 505 | 1013 | 9.6  | 337 | 3.3 |
| 2020 | 11 | 24 | 15 | -2.4 | 85  | 750 | 373 | 1013 | 8.9  | 340 | 3.4 |
| 2020 | 11 | 24 | 16 | -0.8 | 64  | 589 | 204 | 1013 | 7.4  | 340 | 2.8 |
| 2020 | 11 | 24 | 17 | 0.2  | 23  | 219 | 37  | 1013 | 3.9  | 343 | 1.8 |
| 2020 | 11 | 24 | 18 | -0.7 | 0   | 0   | 0   | 1013 | 2.5  | 352 | 1.9 |
| 2020 | 11 | 24 | 19 | -1.1 | 0   | 0   | 0   | 1013 | 2.2  | 357 | 1.9 |
| 2020 | 11 | 24 | 20 | -1.7 | 0   | 0   | 0   | 1014 | 1.4  | 356 | 1.9 |
| 2020 | 11 | 24 | 21 | -2   | 0   | 0   | 0   | 1014 | 1.1  | 2   | 1.8 |
| 2020 | 11 | 24 | 22 | -1.9 | 0   | 0   | 0   | 1014 | 1.5  | 11  | 2   |
| 2020 | 11 | 24 | 23 | -1.6 | 0   | 0   | 0   | 1014 | 1.6  | 13  | 1.6 |
| 2020 | 11 | 25 | 0  | -2.5 | 0   | 0   | 0   | 1014 | 0.4  | 14  | 1.5 |
| 2020 | 11 | 25 | 1  | -3   | 0   | 0   | 0   | 1014 | -0.2 | 10  | 1.5 |
| 2020 | 11 | 25 | 2  | -3.6 | 0   | 0   | 0   | 1014 | -0.7 | 10  | 1.6 |
| 2020 | 11 | 25 | 3  | -3.9 | 0   | 0   | 0   | 1014 | -1   | 9   | 1.7 |
| 2020 | 11 | 25 | 4  | -3.8 | 0   | 0   | 0   | 1014 | -0.8 | 9   | 1.8 |
| 2020 | 11 | 25 | 5  | -4   | 0   | 0   | 0   | 1014 | -0.7 | 10  | 2   |
| 2020 | 11 | 25 | 6  | -3.7 | 0   | 0   | 0   | 1014 | -0.4 | 12  | 2   |
| 2020 | 11 | 25 | 7  | -3.7 | 0   | 0   | 0   | 1015 | -0.7 | 15  | 1.9 |
| 2020 | 11 | 25 | 8  | -2.9 | 43  | 329 | 83  | 1015 | 1.7  | 18  | 2.5 |
| 2020 | 11 | 25 | 9  | -2.6 | 82  | 597 | 255 | 1015 | 4.2  | 16  | 3   |
| 2020 | 11 | 25 | 10 | -0.7 | 105 | 717 | 409 | 1015 | 7.3  | 8   | 3.4 |
| 2020 | 11 | 25 | 11 | 0.9  | 121 | 769 | 518 | 1015 | 9.1  | 358 | 3.8 |
| 2020 | 11 | 25 | 12 | 1.9  | 102 | 858 | 582 | 1014 | 10.1 | 349 | 3.9 |
| 2020 | 11 | 25 | 13 | 2.5  | 107 | 836 | 566 | 1013 | 10.5 | 346 | 3.9 |
| 2020 | 11 | 25 | 14 | 2.8  | 111 | 769 | 488 | 1013 | 10.5 | 345 | 3.9 |
| 2020 | 11 | 25 | 15 | 3.1  | 106 | 649 | 354 | 1013 | 10.1 | 348 | 3.7 |
| 2020 | 11 | 25 | 16 | 3.9  | 80  | 468 | 190 | 1013 | 8.8  | 353 | 2.6 |
| 2020 | 11 | 25 | 17 | 3.5  | 25  | 126 | 32  | 1013 | 5.4  | 360 | 1.4 |
| 2020 | 11 | 25 | 18 | 2.5  | 0   | 0   | 0   | 1013 | 4    | 4   | 1.4 |
| 2020 | 11 | 25 | 19 | 2.1  | 0   | 0   | 0   | 1013 | 3.4  | 6   | 1.4 |
| 2020 | 11 | 25 | 20 | 1.8  | 0   | 0   | 0   | 1013 | 3.1  | 7   | 1.3 |
| 2020 | 11 | 25 | 21 | 1.8  | 0   | 0   | 0   | 1013 | 3.2  | 7   | 1.2 |
| 2020 | 11 | 25 | 22 | 1.8  | 0   | 0   | 0   | 1013 | 3.2  | 7   | 1.2 |
| 2020 | 11 | 25 | 23 | 1.7  | 0   | 0   | 0   | 1013 | 3.1  | 8   | 1.3 |
| 2020 | 11 | 26 | 0  | 1.8  | 0   | 0   | 0   | 1013 | 3.2  | 11  | 1.4 |
| 2020 | 11 | 26 | 1  | 1.8  | 0   | 0   | 0   | 1013 | 3.3  | 9   | 1.5 |

|      |    |    |    |      |     |     |     |      |      |     |     |
|------|----|----|----|------|-----|-----|-----|------|------|-----|-----|
| 2020 | 11 | 26 | 2  | 1.8  | 0   | 0   | 0   | 1013 | 3.2  | 14  | 1.5 |
| 2020 | 11 | 26 | 3  | 1.8  | 0   | 0   | 0   | 1013 | 3.1  | 6   | 1.4 |
| 2020 | 11 | 26 | 4  | 1.8  | 0   | 0   | 0   | 1013 | 3.2  | 7   | 1.4 |
| 2020 | 11 | 26 | 5  | 1.9  | 0   | 0   | 0   | 1013 | 3.3  | 14  | 1.5 |
| 2020 | 11 | 26 | 6  | 1.6  | 0   | 0   | 0   | 1013 | 2.8  | 17  | 1.3 |
| 2020 | 11 | 26 | 7  | 1.6  | 0   | 0   | 0   | 1014 | 2.8  | 24  | 1.3 |
| 2020 | 11 | 26 | 8  | 2.4  | 41  | 189 | 64  | 1013 | 4    | 30  | 1.6 |
| 2020 | 11 | 26 | 9  | 2.6  | 90  | 411 | 208 | 1014 | 6.1  | 27  | 2.4 |
| 2020 | 11 | 26 | 10 | 2.9  | 127 | 599 | 380 | 1014 | 8.5  | 23  | 2.7 |
| 2020 | 11 | 26 | 11 | 3.1  | 144 | 672 | 488 | 1013 | 10.1 | 13  | 2.6 |
| 2020 | 11 | 26 | 12 | 3.2  | 139 | 730 | 546 | 1013 | 11.1 | 6   | 2.5 |
| 2020 | 11 | 26 | 13 | 3.2  | 137 | 732 | 538 | 1012 | 11.7 | 2   | 2.5 |
| 2020 | 11 | 26 | 14 | 3.1  | 129 | 691 | 466 | 1012 | 11.8 | 352 | 2.5 |
| 2020 | 11 | 26 | 15 | 3.3  | 116 | 586 | 338 | 1012 | 11.3 | 348 | 2.6 |
| 2020 | 11 | 26 | 16 | 4.6  | 82  | 416 | 179 | 1012 | 9.8  | 346 | 1.9 |
| 2020 | 11 | 26 | 17 | 4.6  | 22  | 102 | 28  | 1012 | 7.1  | 345 | 1.6 |
| 2020 | 11 | 26 | 18 | 3.8  | 0   | 0   | 0   | 1013 | 6.2  | 349 | 1.8 |
| 2020 | 11 | 26 | 19 | 3.2  | 0   | 0   | 0   | 1013 | 5.7  | 354 | 1.8 |
| 2020 | 11 | 26 | 20 | 2.5  | 0   | 0   | 0   | 1013 | 5.1  | 353 | 1.8 |
| 2020 | 11 | 26 | 21 | 1.9  | 0   | 0   | 0   | 1013 | 4.4  | 360 | 1.7 |
| 2020 | 11 | 26 | 22 | 1.9  | 0   | 0   | 0   | 1013 | 4.4  | 9   | 1.5 |
| 2020 | 11 | 26 | 23 | 1.9  | 0   | 0   | 0   | 1013 | 4.3  | 7   | 1.3 |
| 2020 | 11 | 27 | 0  | 1.6  | 0   | 0   | 0   | 1013 | 3.9  | 359 | 1.2 |
| 2020 | 11 | 27 | 1  | 0.9  | 0   | 0   | 0   | 1013 | 3.2  | 352 | 1.4 |
| 2020 | 11 | 27 | 2  | 0.7  | 0   | 0   | 0   | 1013 | 3.1  | 350 | 1.7 |
| 2020 | 11 | 27 | 3  | 0.5  | 0   | 0   | 0   | 1013 | 2.8  | 350 | 2   |
| 2020 | 11 | 27 | 4  | 0.5  | 0   | 0   | 0   | 1013 | 2.7  | 349 | 2.2 |
| 2020 | 11 | 27 | 5  | 1    | 0   | 0   | 0   | 1013 | 2.7  | 350 | 2.3 |
| 2020 | 11 | 27 | 6  | 1.6  | 0   | 0   | 0   | 1013 | 2.8  | 353 | 2   |
| 2020 | 11 | 27 | 7  | 2    | 0   | 0   | 0   | 1013 | 2.9  | 352 | 1.8 |
| 2020 | 11 | 27 | 8  | 3.4  | 41  | 65  | 49  | 1013 | 5.1  | 347 | 2.4 |
| 2020 | 11 | 27 | 9  | 4.2  | 110 | 205 | 168 | 1013 | 7.3  | 339 | 3.1 |
| 2020 | 11 | 27 | 10 | 4.1  | 131 | 596 | 381 | 1013 | 9.3  | 326 | 4   |
| 2020 | 11 | 27 | 11 | 4    | 172 | 6   | 174 | 1013 | 10.1 | 319 | 5   |
| 2020 | 11 | 27 | 12 | 3.9  | 47  | 0   | 47  | 1013 | 10.3 | 318 | 5.8 |
| 2020 | 11 | 27 | 13 | 3.3  | 46  | 0   | 46  | 1012 | 9.8  | 319 | 6.2 |
| 2020 | 11 | 27 | 14 | 2.5  | 213 | 95  | 259 | 1012 | 9    | 319 | 6.6 |
| 2020 | 11 | 27 | 15 | 1.8  | 18  | 0   | 18  | 1012 | 7.9  | 321 | 6.4 |
| 2020 | 11 | 27 | 16 | 1.1  | 89  | 64  | 104 | 1012 | 6.6  | 322 | 6   |
| 2020 | 11 | 27 | 17 | 0.5  | 16  | 0   | 16  | 1012 | 5.4  | 323 | 5.6 |
| 2020 | 11 | 27 | 18 | 0.1  | 0   | 0   | 0   | 1013 | 4.7  | 325 | 5.2 |
| 2020 | 11 | 27 | 19 | 0    | 0   | 0   | 0   | 1014 | 4.5  | 326 | 5   |
| 2020 | 11 | 27 | 20 | -0.4 | 0   | 0   | 0   | 1014 | 4.1  | 328 | 4.7 |
| 2020 | 11 | 27 | 21 | -0.3 | 0   | 0   | 0   | 1014 | 3.8  | 330 | 4.3 |
| 2020 | 11 | 27 | 22 | -0.2 | 0   | 0   | 0   | 1014 | 3.7  | 332 | 4.1 |
| 2020 | 11 | 27 | 23 | 0    | 0   | 0   | 0   | 1015 | 3.6  | 334 | 3.8 |
| 2020 | 11 | 28 | 0  | 0.2  | 0   | 0   | 0   | 1015 | 3.5  | 335 | 3.6 |
| 2020 | 11 | 28 | 1  | 0.6  | 0   | 0   | 0   | 1015 | 3.5  | 336 | 3.4 |
| 2020 | 11 | 28 | 2  | 0.9  | 0   | 0   | 0   | 1015 | 3.6  | 337 | 3.2 |
| 2020 | 11 | 28 | 3  | 1    | 0   | 0   | 0   | 1015 | 3.5  | 338 | 3.2 |

|      |    |    |    |      |     |     |     |      |      |     |     |
|------|----|----|----|------|-----|-----|-----|------|------|-----|-----|
| 2020 | 11 | 28 | 4  | 1.1  | 0   | 0   | 0   | 1015 | 3.7  | 338 | 3.7 |
| 2020 | 11 | 28 | 5  | 1    | 0   | 0   | 0   | 1015 | 3.7  | 340 | 3.9 |
| 2020 | 11 | 28 | 6  | 0.5  | 0   | 0   | 0   | 1015 | 3.2  | 343 | 3.8 |
| 2020 | 11 | 28 | 7  | -0.3 | 0   | 0   | 0   | 1015 | 2.6  | 346 | 3.7 |
| 2020 | 11 | 28 | 8  | -0.9 | 40  | 93  | 51  | 1016 | 3.1  | 348 | 4.2 |
| 2020 | 11 | 28 | 9  | -1.7 | 104 | 263 | 178 | 1016 | 4    | 347 | 5   |
| 2020 | 11 | 28 | 10 | -2.3 | 94  | 766 | 412 | 1017 | 4.6  | 345 | 5.3 |
| 2020 | 11 | 28 | 11 | -2.5 | 201 | 365 | 386 | 1016 | 5.3  | 342 | 5.2 |
| 2020 | 11 | 28 | 12 | -2.7 | 249 | 216 | 368 | 1016 | 5.8  | 338 | 5.1 |
| 2020 | 11 | 28 | 13 | -2.6 | 231 | 306 | 397 | 1015 | 5.9  | 335 | 5.2 |
| 2020 | 11 | 28 | 14 | -2.5 | 112 | 778 | 488 | 1015 | 5.7  | 334 | 5.2 |
| 2020 | 11 | 28 | 15 | -2.3 | 158 | 168 | 221 | 1015 | 4.7  | 336 | 4.9 |
| 2020 | 11 | 28 | 16 | -1.9 | 76  | 332 | 153 | 1015 | 3.7  | 340 | 4.3 |
| 2020 | 11 | 28 | 17 | -1.3 | 25  | 67  | 29  | 1015 | 2.8  | 345 | 3.5 |
| 2020 | 11 | 28 | 18 | -0.7 | 0   | 0   | 0   | 1015 | 2.4  | 353 | 2.9 |
| 2020 | 11 | 28 | 19 | -0.2 | 0   | 0   | 0   | 1015 | 2.1  | 353 | 2.4 |
| 2020 | 11 | 28 | 20 | 0    | 0   | 0   | 0   | 1015 | 2    | 348 | 2   |
| 2020 | 11 | 28 | 21 | 0.2  | 0   | 0   | 0   | 1015 | 1.9  | 346 | 1.8 |
| 2020 | 11 | 28 | 22 | 0.3  | 0   | 0   | 0   | 1015 | 1.9  | 346 | 1.6 |
| 2020 | 11 | 28 | 23 | 0.1  | 0   | 0   | 0   | 1015 | 1.7  | 342 | 1.5 |
| 2020 | 11 | 29 | 0  | 0.1  | 0   | 0   | 0   | 1015 | 1.8  | 341 | 1.6 |
| 2020 | 11 | 29 | 1  | 0    | 0   | 0   | 0   | 1014 | 1.7  | 342 | 1.4 |
| 2020 | 11 | 29 | 2  | -0.1 | 0   | 0   | 0   | 1014 | 1.5  | 343 | 1.4 |
| 2020 | 11 | 29 | 3  | -0.1 | 0   | 0   | 0   | 1014 | 1.5  | 344 | 1.4 |
| 2020 | 11 | 29 | 4  | 0    | 0   | 0   | 0   | 1014 | 1.6  | 346 | 1.4 |
| 2020 | 11 | 29 | 5  | -0.2 | 0   | 0   | 0   | 1015 | 1.2  | 348 | 1.4 |
| 2020 | 11 | 29 | 6  | -0.1 | 0   | 0   | 0   | 1015 | 1.2  | 351 | 1.5 |
| 2020 | 11 | 29 | 7  | -0.2 | 0   | 0   | 0   | 1015 | 1.2  | 353 | 1.5 |
| 2020 | 11 | 29 | 8  | -0.2 | 26  | 0   | 26  | 1016 | 2.2  | 354 | 2.3 |
| 2020 | 11 | 29 | 9  | -0.2 | 108 | 55  | 124 | 1016 | 3.7  | 350 | 2.7 |
| 2020 | 11 | 29 | 10 | 0.3  | 149 | 385 | 308 | 1016 | 5.3  | 338 | 3.1 |
| 2020 | 11 | 29 | 11 | 0.7  | 222 | 89  | 267 | 1015 | 6.5  | 328 | 3.8 |
| 2020 | 11 | 29 | 12 | 1.1  | 112 | 0   | 112 | 1015 | 7.2  | 324 | 4.4 |
| 2020 | 11 | 29 | 13 | 1.2  | 229 | 52  | 257 | 1015 | 7.4  | 323 | 4.8 |
| 2020 | 11 | 29 | 14 | 1.2  | 187 | 28  | 201 | 1015 | 7.3  | 324 | 4.9 |
| 2020 | 11 | 29 | 15 | 1    | 50  | 0   | 50  | 1015 | 6.6  | 326 | 4.7 |
| 2020 | 11 | 29 | 16 | 1    | 79  | 0   | 79  | 1016 | 5.6  | 330 | 4   |
| 2020 | 11 | 29 | 17 | 1.2  | 24  | 89  | 29  | 1016 | 3.7  | 336 | 2.5 |
| 2020 | 11 | 29 | 18 | 0.7  | 0   | 0   | 0   | 1016 | 2.3  | 342 | 1.8 |
| 2020 | 11 | 29 | 19 | 0.2  | 0   | 0   | 0   | 1017 | 1.5  | 346 | 1.6 |
| 2020 | 11 | 29 | 20 | -0.2 | 0   | 0   | 0   | 1017 | 1.1  | 349 | 1.6 |
| 2020 | 11 | 29 | 21 | -0.3 | 0   | 0   | 0   | 1018 | 0.9  | 352 | 1.6 |
| 2020 | 11 | 29 | 22 | -0.4 | 0   | 0   | 0   | 1018 | 0.7  | 356 | 1.7 |
| 2020 | 11 | 29 | 23 | -0.5 | 0   | 0   | 0   | 1018 | 0.6  | 360 | 1.8 |
| 2020 | 11 | 30 | 0  | -0.5 | 0   | 0   | 0   | 1019 | 0.5  | 2   | 1.9 |
| 2020 | 11 | 30 | 1  | -0.9 | 0   | 0   | 0   | 1019 | 0    | 5   | 1.9 |
| 2020 | 11 | 30 | 2  | -1.2 | 0   | 0   | 0   | 1019 | -0.8 | 9   | 1.7 |
| 2020 | 11 | 30 | 3  | -1.6 | 0   | 0   | 0   | 1019 | -1.1 | 10  | 1.7 |
| 2020 | 11 | 30 | 4  | -1.9 | 0   | 0   | 0   | 1019 | -1.1 | 10  | 1.8 |
| 2020 | 11 | 30 | 5  | -2.1 | 0   | 0   | 0   | 1019 | -1.6 | 14  | 1.6 |



|      |    |    |    |      |     |     |     |      |      |     |     |
|------|----|----|----|------|-----|-----|-----|------|------|-----|-----|
| 2020 | 11 | 30 | 6  | -2.4 | 0   | 0   | 0   | 1020 | -1.9 | 18  | 1.4 |
| 2020 | 11 | 30 | 7  | -2.6 | 0   | 0   | 0   | 1020 | -2.1 | 17  | 1.3 |
| 2020 | 11 | 30 | 8  | -1.6 | 46  | 216 | 69  | 1021 | 0.5  | 18  | 1.8 |
| 2020 | 11 | 30 | 9  | -1   | 91  | 529 | 236 | 1021 | 3    | 15  | 2.4 |
| 2020 | 11 | 30 | 10 | -0.1 | 115 | 674 | 391 | 1021 | 5.6  | 354 | 2.8 |
| 2020 | 11 | 30 | 11 | 0.2  | 134 | 734 | 502 | 1021 | 6.7  | 342 | 3.3 |
| 2020 | 11 | 30 | 12 | 0.4  | 126 | 801 | 563 | 1020 | 7.4  | 340 | 3.7 |
| 2020 | 11 | 30 | 13 | 0.5  | 135 | 773 | 551 | 1020 | 7.5  | 339 | 4   |
| 2020 | 11 | 30 | 14 | 0.3  | 156 | 1   | 157 | 1019 | 7.3  | 341 | 4.2 |
| 2020 | 11 | 30 | 15 | 0.1  | 112 | 638 | 350 | 1020 | 6.8  | 342 | 4.2 |
| 2020 | 11 | 30 | 16 | 0.1  | 81  | 461 | 186 | 1020 | 5.7  | 344 | 3.6 |
| 2020 | 11 | 30 | 17 | 0.6  | 24  | 105 | 30  | 1021 | 3.4  | 350 | 2.1 |
| 2020 | 11 | 30 | 18 | 0.4  | 0   | 0   | 0   | 1021 | 2.4  | 357 | 2   |
| 2020 | 11 | 30 | 19 | -0.2 | 0   | 0   | 0   | 1022 | 1.5  | 2   | 2.2 |
| 2020 | 11 | 30 | 20 | -1   | 0   | 0   | 0   | 1022 | 0.4  | 7   | 2.2 |
| 2020 | 11 | 30 | 21 | -2   | 0   | 0   | 0   | 1022 | -0.6 | 10  | 2   |
| 2020 | 11 | 30 | 22 | -3   | 0   | 0   | 0   | 1022 | -1.5 | 11  | 1.9 |
| 2020 | 11 | 30 | 23 | -3.8 | 0   | 0   | 0   | 1022 | -2.2 | 9   | 1.7 |
| 2020 | 12 | 1  | 0  | -4.4 | 0   | 0   | 0   | 1022 | -2.8 | 6   | 1.7 |
| 2020 | 12 | 1  | 1  | -4.8 | 0   | 0   | 0   | 1022 | -3.2 | 5   | 1.7 |
| 2020 | 12 | 1  | 2  | -4.9 | 0   | 0   | 0   | 1022 | -3.1 | 7   | 1.7 |
| 2020 | 12 | 1  | 3  | -5.2 | 0   | 0   | 0   | 1022 | -3.3 | 8   | 1.9 |
| 2020 | 12 | 1  | 4  | -5.5 | 0   | 0   | 0   | 1022 | -3.5 | 12  | 2   |
| 2020 | 12 | 1  | 5  | -5.9 | 0   | 0   | 0   | 1022 | -3.6 | 17  | 2.1 |
| 2020 | 12 | 1  | 6  | -6.2 | 0   | 0   | 0   | 1022 | -3.9 | 19  | 1.9 |
| 2020 | 12 | 1  | 7  | -6.5 | 0   | 0   | 0   | 1023 | -4   | 20  | 1.8 |
| 2020 | 12 | 1  | 8  | -6.2 | 38  | 339 | 74  | 1023 | -1.8 | 22  | 2.8 |
| 2020 | 12 | 1  | 9  | -6.1 | 74  | 628 | 245 | 1022 | 0.5  | 23  | 3.1 |
| 2020 | 12 | 1  | 10 | -7.1 | 94  | 758 | 402 | 1022 | 3.3  | 27  | 3.3 |
| 2020 | 12 | 1  | 11 | -7.1 | 107 | 811 | 512 | 1021 | 5.3  | 28  | 3.1 |
| 2020 | 12 | 1  | 12 | -6.7 | 105 | 854 | 569 | 1020 | 6.9  | 22  | 2.8 |
| 2020 | 12 | 1  | 13 | -6.2 | 102 | 858 | 562 | 1020 | 7.7  | 15  | 2.6 |
| 2020 | 12 | 1  | 14 | -5.6 | 99  | 808 | 486 | 1019 | 8    | 9   | 2.7 |
| 2020 | 12 | 1  | 15 | -4.2 | 89  | 721 | 358 | 1019 | 7.1  | 5   | 2.6 |
| 2020 | 12 | 1  | 16 | -0.7 | 88  | 131 | 118 | 1019 | 5.2  | 2   | 1.8 |
| 2020 | 12 | 1  | 17 | -1.1 | 18  | 0   | 18  | 1018 | 2.7  | 5   | 1.8 |
| 2020 | 12 | 1  | 18 | -2   | 0   | 0   | 0   | 1019 | 1.6  | 12  | 2.1 |
| 2020 | 12 | 1  | 19 | -2.8 | 0   | 0   | 0   | 1019 | 0.6  | 19  | 2   |
| 2020 | 12 | 1  | 20 | -3.4 | 0   | 0   | 0   | 1019 | -0.2 | 26  | 1.8 |
| 2020 | 12 | 1  | 21 | -3.7 | 0   | 0   | 0   | 1018 | -0.5 | 32  | 1.6 |
| 2020 | 12 | 1  | 22 | -3.8 | 0   | 0   | 0   | 1018 | -0.6 | 34  | 1.4 |
| 2020 | 12 | 1  | 23 | -3.9 | 0   | 0   | 0   | 1018 | -0.9 | 31  | 1.3 |
| 2020 | 12 | 2  | 0  | -4.3 | 0   | 0   | 0   | 1018 | -1.2 | 27  | 1.4 |
| 2020 | 12 | 2  | 1  | -4.5 | 0   | 0   | 0   | 1018 | -1.3 | 25  | 1.4 |
| 2020 | 12 | 2  | 2  | -4.5 | 0   | 0   | 0   | 1018 | -1.3 | 24  | 1.6 |
| 2020 | 12 | 2  | 3  | -4.8 | 0   | 0   | 0   | 1017 | -1.5 | 22  | 1.6 |
| 2020 | 12 | 2  | 4  | -5.3 | 0   | 0   | 0   | 1017 | -2.1 | 20  | 1.7 |
| 2020 | 12 | 2  | 5  | -5.5 | 0   | 0   | 0   | 1017 | -2.3 | 21  | 1.7 |
| 2020 | 12 | 2  | 6  | -5.5 | 0   | 0   | 0   | 1017 | -2.2 | 25  | 1.7 |
| 2020 | 12 | 2  | 7  | -5.7 | 0   | 0   | 0   | 1017 | -2.6 | 25  | 1.6 |

|      |    |   |    |      |     |     |     |      |      |     |     |
|------|----|---|----|------|-----|-----|-----|------|------|-----|-----|
| 2020 | 12 | 2 | 8  | -5.4 | 36  | 345 | 71  | 1017 | -0.5 | 24  | 2.4 |
| 2020 | 12 | 2 | 9  | -5.1 | 106 | 140 | 144 | 1017 | 1.8  | 16  | 3   |
| 2020 | 12 | 2 | 10 | -4   | 116 | 0   | 116 | 1017 | 4.6  | 10  | 3.1 |
| 2020 | 12 | 2 | 11 | -5.1 | 222 | 145 | 294 | 1016 | 7.4  | 7   | 3.1 |
| 2020 | 12 | 2 | 12 | -4.8 | 246 | 189 | 348 | 1015 | 8.5  | 0   | 3.4 |
| 2020 | 12 | 2 | 13 | -4.6 | 88  | 899 | 568 | 1015 | 8.8  | 357 | 3.8 |
| 2020 | 12 | 2 | 14 | -4.5 | 84  | 858 | 492 | 1014 | 8.5  | 351 | 4   |
| 2020 | 12 | 2 | 15 | -4.1 | 78  | 761 | 361 | 1014 | 7.7  | 350 | 4   |
| 2020 | 12 | 2 | 16 | -2.2 | 63  | 567 | 192 | 1014 | 5.8  | 350 | 3.1 |
| 2020 | 12 | 2 | 17 | -1.3 | 22  | 166 | 31  | 1015 | 2.5  | 352 | 2.1 |
| 2020 | 12 | 2 | 18 | -1.6 | 0   | 0   | 0   | 1015 | 1.5  | 355 | 2.2 |
| 2020 | 12 | 2 | 19 | -1.8 | 0   | 0   | 0   | 1016 | 0.9  | 359 | 2.1 |
| 2020 | 12 | 2 | 20 | -2.2 | 0   | 0   | 0   | 1016 | 0.2  | 3   | 2   |
| 2020 | 12 | 2 | 21 | -2.7 | 0   | 0   | 0   | 1016 | -0.2 | 5   | 1.8 |
| 2020 | 12 | 2 | 22 | -3.1 | 0   | 0   | 0   | 1016 | -0.6 | 5   | 1.8 |
| 2020 | 12 | 2 | 23 | -3.7 | 0   | 0   | 0   | 1016 | -1.2 | 6   | 1.8 |
| 2020 | 12 | 3 | 0  | -4   | 0   | 0   | 0   | 1016 | -1.4 | 8   | 1.9 |
| 2020 | 12 | 3 | 1  | -3.9 | 0   | 0   | 0   | 1015 | -1.4 | 9   | 1.8 |
| 2020 | 12 | 3 | 2  | -4   | 0   | 0   | 0   | 1015 | -1.6 | 10  | 1.8 |
| 2020 | 12 | 3 | 3  | -3.9 | 0   | 0   | 0   | 1015 | -1.6 | 9   | 1.7 |
| 2020 | 12 | 3 | 4  | -4.2 | 0   | 0   | 0   | 1015 | -1.7 | 10  | 1.7 |
| 2020 | 12 | 3 | 5  | -4.1 | 0   | 0   | 0   | 1015 | -1.5 | 13  | 1.7 |
| 2020 | 12 | 3 | 6  | -4.6 | 0   | 0   | 0   | 1015 | -1.8 | 16  | 1.6 |
| 2020 | 12 | 3 | 7  | -4.6 | 0   | 0   | 0   | 1016 | -1.9 | 18  | 1.5 |
| 2020 | 12 | 3 | 8  | -3.5 | 41  | 152 | 57  | 1016 | 0.3  | 19  | 2   |
| 2020 | 12 | 3 | 9  | -3.5 | 105 | 103 | 133 | 1016 | 2.4  | 16  | 2.9 |
| 2020 | 12 | 3 | 10 | -1.7 | 129 | 605 | 372 | 1016 | 4.5  | 6   | 3.8 |
| 2020 | 12 | 3 | 11 | -0.4 | 144 | 682 | 481 | 1016 | 5.7  | 357 | 4.1 |
| 2020 | 12 | 3 | 12 | 0.1  | 144 | 731 | 538 | 1016 | 6.3  | 349 | 4.4 |
| 2020 | 12 | 3 | 13 | 0.3  | 150 | 712 | 530 | 1015 | 6.5  | 346 | 4.6 |
| 2020 | 12 | 3 | 14 | 0.2  | 147 | 656 | 459 | 1015 | 6.4  | 344 | 4.8 |
| 2020 | 12 | 3 | 15 | -0.1 | 123 | 592 | 342 | 1015 | 5.8  | 341 | 4.7 |
| 2020 | 12 | 3 | 16 | -0.7 | 54  | 0   | 54  | 1015 | 4.6  | 342 | 4   |
| 2020 | 12 | 3 | 17 | -0.9 | 24  | 134 | 31  | 1016 | 2.7  | 345 | 2.8 |
| 2020 | 12 | 3 | 18 | -1.2 | 0   | 0   | 0   | 1016 | 1.4  | 350 | 2.3 |
| 2020 | 12 | 3 | 19 | -1.5 | 0   | 0   | 0   | 1016 | 0.7  | 349 | 2.2 |
| 2020 | 12 | 3 | 20 | -1.8 | 0   | 0   | 0   | 1017 | 0.4  | 350 | 2.3 |
| 2020 | 12 | 3 | 21 | -2.3 | 0   | 0   | 0   | 1017 | -0.2 | 355 | 2   |
| 2020 | 12 | 3 | 22 | -2.5 | 0   | 0   | 0   | 1017 | -0.5 | 358 | 1.7 |
| 2020 | 12 | 3 | 23 | -2.5 | 0   | 0   | 0   | 1017 | -0.5 | 359 | 1.6 |
| 2020 | 12 | 4 | 0  | -2.6 | 0   | 0   | 0   | 1017 | -0.6 | 360 | 1.7 |
| 2020 | 12 | 4 | 1  | -3.3 | 0   | 0   | 0   | 1017 | -1.5 | 3   | 1.7 |
| 2020 | 12 | 4 | 2  | -4   | 0   | 0   | 0   | 1017 | -2.3 | 8   | 1.8 |
| 2020 | 12 | 4 | 3  | -4.7 | 0   | 0   | 0   | 1017 | -2.9 | 12  | 1.8 |
| 2020 | 12 | 4 | 4  | -5.2 | 0   | 0   | 0   | 1016 | -3.3 | 15  | 1.9 |
| 2020 | 12 | 4 | 5  | -5.7 | 0   | 0   | 0   | 1016 | -3.5 | 15  | 1.9 |
| 2020 | 12 | 4 | 6  | -6.1 | 0   | 0   | 0   | 1017 | -3.7 | 15  | 1.8 |
| 2020 | 12 | 4 | 7  | -6.3 | 0   | 0   | 0   | 1017 | -3.8 | 15  | 1.7 |
| 2020 | 12 | 4 | 8  | -6.1 | 34  | 302 | 64  | 1017 | -1.7 | 12  | 2.8 |
| 2020 | 12 | 4 | 9  | -5.5 | 73  | 595 | 229 | 1017 | 0.5  | 5   | 3.7 |

|      |    |   |    |      |     |     |     |      |      |     |     |
|------|----|---|----|------|-----|-----|-----|------|------|-----|-----|
| 2020 | 12 | 4 | 10 | -4.5 | 170 | 143 | 227 | 1017 | 2.3  | 358 | 4.2 |
| 2020 | 12 | 4 | 11 | -3.8 | 204 | 303 | 353 | 1017 | 3.7  | 351 | 4.2 |
| 2020 | 12 | 4 | 12 | -3.2 | 241 | 220 | 359 | 1016 | 4.4  | 346 | 4.1 |
| 2020 | 12 | 4 | 13 | -2.6 | 239 | 209 | 350 | 1016 | 4.6  | 342 | 4.1 |
| 2020 | 12 | 4 | 14 | -2.1 | 165 | 596 | 447 | 1015 | 4.8  | 341 | 4   |
| 2020 | 12 | 4 | 15 | -1.7 | 103 | 653 | 345 | 1015 | 4.9  | 341 | 3.8 |
| 2020 | 12 | 4 | 16 | -0.8 | 72  | 514 | 188 | 1016 | 3.9  | 343 | 2.6 |
| 2020 | 12 | 4 | 17 | -1.6 | 23  | 151 | 31  | 1016 | 0.5  | 348 | 1.4 |
| 2020 | 12 | 4 | 18 | -2.6 | 0   | 0   | 0   | 1016 | -0.6 | 354 | 1.4 |
| 2020 | 12 | 4 | 19 | -3   | 0   | 0   | 0   | 1016 | -1.2 | 359 | 1.3 |
| 2020 | 12 | 4 | 20 | -3.3 | 0   | 0   | 0   | 1017 | -1.7 | 4   | 1.3 |
| 2020 | 12 | 4 | 21 | -3.5 | 0   | 0   | 0   | 1017 | -2.1 | 7   | 1.3 |
| 2020 | 12 | 4 | 22 | -3.7 | 0   | 0   | 0   | 1017 | -2.4 | 9   | 1.2 |
| 2020 | 12 | 4 | 23 | -4   | 0   | 0   | 0   | 1017 | -2.5 | 10  | 1.2 |
| 2020 | 12 | 5 | 0  | -4.2 | 0   | 0   | 0   | 1017 | -2.6 | 11  | 1.2 |
| 2020 | 12 | 5 | 1  | -4.4 | 0   | 0   | 0   | 1017 | -2.6 | 11  | 1.2 |
| 2020 | 12 | 5 | 2  | -4.5 | 0   | 0   | 0   | 1017 | -2.6 | 11  | 1.2 |
| 2020 | 12 | 5 | 3  | -4.4 | 0   | 0   | 0   | 1017 | -2.3 | 9   | 1.1 |
| 2020 | 12 | 5 | 4  | -3.9 | 0   | 0   | 0   | 1016 | -1.9 | 3   | 1.1 |
| 2020 | 12 | 5 | 5  | -3.6 | 0   | 0   | 0   | 1016 | -1.6 | 0   | 1.1 |
| 2020 | 12 | 5 | 6  | -2.9 | 0   | 0   | 0   | 1017 | -1   | 358 | 1.1 |
| 2020 | 12 | 5 | 7  | -2.9 | 0   | 0   | 0   | 1017 | -0.9 | 355 | 1.1 |
| 2020 | 12 | 5 | 8  | -1.1 | 36  | 253 | 60  | 1017 | 1.1  | 352 | 1.2 |
| 2020 | 12 | 5 | 9  | -1.2 | 78  | 557 | 224 | 1018 | 3.8  | 344 | 2.3 |
| 2020 | 12 | 5 | 10 | -1   | 108 | 670 | 373 | 1018 | 6.4  | 335 | 3.2 |
| 2020 | 12 | 5 | 11 | -1   | 120 | 754 | 489 | 1017 | 7.7  | 334 | 3.6 |
| 2020 | 12 | 5 | 12 | -0.8 | 104 | 845 | 556 | 1016 | 8.4  | 336 | 3.7 |
| 2020 | 12 | 5 | 13 | -0.7 | 112 | 817 | 544 | 1016 | 8.4  | 336 | 3.6 |
| 2020 | 12 | 5 | 14 | -0.5 | 107 | 773 | 472 | 1015 | 8.3  | 335 | 3.3 |
| 2020 | 12 | 5 | 15 | -0.3 | 95  | 683 | 347 | 1015 | 7.7  | 336 | 2.8 |
| 2020 | 12 | 5 | 16 | 1.5  | 71  | 504 | 185 | 1015 | 5.9  | 334 | 1.4 |
| 2020 | 12 | 5 | 17 | -0.6 | 23  | 124 | 29  | 1016 | 2.3  | 333 | 1.2 |
| 2020 | 12 | 5 | 18 | -1.6 | 0   | 0   | 0   | 1016 | 1.5  | 334 | 1.3 |
| 2020 | 12 | 5 | 19 | -1.9 | 0   | 0   | 0   | 1016 | 1.2  | 339 | 1.3 |
| 2020 | 12 | 5 | 20 | -2.1 | 0   | 0   | 0   | 1016 | 0.9  | 343 | 1.3 |
| 2020 | 12 | 5 | 21 | -2.3 | 0   | 0   | 0   | 1016 | 0.7  | 341 | 1.3 |
| 2020 | 12 | 5 | 22 | -2.4 | 0   | 0   | 0   | 1016 | 0.4  | 340 | 1.3 |
| 2020 | 12 | 5 | 23 | -2.4 | 0   | 0   | 0   | 1016 | 0    | 341 | 1.3 |
| 2020 | 12 | 6 | 0  | -2.2 | 0   | 0   | 0   | 1016 | -0.3 | 342 | 1.3 |
| 2020 | 12 | 6 | 1  | -2   | 0   | 0   | 0   | 1016 | -0.6 | 343 | 1.3 |
| 2020 | 12 | 6 | 2  | -1.8 | 0   | 0   | 0   | 1016 | -0.9 | 345 | 1.3 |
| 2020 | 12 | 6 | 3  | -1.6 | 0   | 0   | 0   | 1016 | -1.1 | 350 | 1.4 |
| 2020 | 12 | 6 | 4  | -1.5 | 0   | 0   | 0   | 1016 | -1.2 | 356 | 1.4 |
| 2020 | 12 | 6 | 5  | -1.5 | 0   | 0   | 0   | 1016 | -1.3 | 359 | 1.4 |
| 2020 | 12 | 6 | 6  | -1.5 | 0   | 0   | 0   | 1016 | -1.3 | 2   | 1.3 |
| 2020 | 12 | 6 | 7  | -1.5 | 0   | 0   | 0   | 1016 | -1.2 | 9   | 1.3 |
| 2020 | 12 | 6 | 8  | -0.4 | 36  | 218 | 56  | 1016 | 1    | 20  | 1   |
| 2020 | 12 | 6 | 9  | 0    | 83  | 524 | 218 | 1016 | 3.9  | 28  | 1.8 |
| 2020 | 12 | 6 | 10 | -0.1 | 110 | 664 | 371 | 1016 | 6.4  | 4   | 2   |
| 2020 | 12 | 6 | 11 | 0    | 127 | 722 | 479 | 1016 | 7.5  | 348 | 2   |

|      |    |   |    |      |     |     |     |      |      |     |     |
|------|----|---|----|------|-----|-----|-----|------|------|-----|-----|
| 2020 | 12 | 6 | 12 | 0.3  | 109 | 831 | 551 | 1015 | 8.4  | 332 | 2.2 |
| 2020 | 12 | 6 | 13 | 0.3  | 111 | 814 | 540 | 1015 | 9    | 325 | 2.5 |
| 2020 | 12 | 6 | 14 | 0.3  | 108 | 769 | 470 | 1014 | 9.1  | 324 | 2.7 |
| 2020 | 12 | 6 | 15 | 0.3  | 93  | 694 | 349 | 1014 | 8.6  | 328 | 2.7 |
| 2020 | 12 | 6 | 16 | 2    | 70  | 521 | 187 | 1014 | 6.7  | 336 | 1.6 |
| 2020 | 12 | 6 | 17 | 0.3  | 23  | 148 | 31  | 1014 | 2.9  | 345 | 1.3 |
| 2020 | 12 | 6 | 18 | -1   | 0   | 0   | 0   | 1014 | 1.7  | 348 | 1.3 |
| 2020 | 12 | 6 | 19 | -1.6 | 0   | 0   | 0   | 1015 | 1.2  | 348 | 1.3 |
| 2020 | 12 | 6 | 20 | -2   | 0   | 0   | 0   | 1015 | 1    | 345 | 1.3 |
| 2020 | 12 | 6 | 21 | -2.2 | 0   | 0   | 0   | 1015 | 0.8  | 343 | 1.3 |
| 2020 | 12 | 6 | 22 | -2.3 | 0   | 0   | 0   | 1015 | 0.7  | 348 | 1.3 |
| 2020 | 12 | 6 | 23 | -2.4 | 0   | 0   | 0   | 1015 | 0.3  | 356 | 1.3 |
| 2020 | 12 | 7 | 0  | -2.5 | 0   | 0   | 0   | 1015 | -0.1 | 1   | 1.3 |
| 2020 | 12 | 7 | 1  | -2.6 | 0   | 0   | 0   | 1015 | -0.4 | 2   | 1.3 |
| 2020 | 12 | 7 | 2  | -2.6 | 0   | 0   | 0   | 1015 | -0.7 | 2   | 1.4 |
| 2020 | 12 | 7 | 3  | -2.6 | 0   | 0   | 0   | 1014 | -0.7 | 5   | 1.4 |
| 2020 | 12 | 7 | 4  | -2.5 | 0   | 0   | 0   | 1014 | -0.6 | 6   | 1.3 |
| 2020 | 12 | 7 | 5  | -2.3 | 0   | 0   | 0   | 1014 | 0.1  | 4   | 1.2 |
| 2020 | 12 | 7 | 6  | -1.7 | 0   | 0   | 0   | 1014 | 0.9  | 5   | 1.1 |
| 2020 | 12 | 7 | 7  | -1.4 | 0   | 0   | 0   | 1015 | 1.5  | 10  | 1   |
| 2020 | 12 | 7 | 8  | -0.2 | 10  | 0   | 10  | 1015 | 2.7  | 22  | 0.8 |
| 2020 | 12 | 7 | 9  | 1.2  | 39  | 0   | 39  | 1015 | 4.3  | 31  | 0.6 |
| 2020 | 12 | 7 | 10 | 0.7  | 28  | 0   | 28  | 1015 | 5.9  | 353 | 0.7 |
| 2020 | 12 | 7 | 11 | 2.4  | 206 | 61  | 235 | 1015 | 8.5  | 320 | 1.6 |
| 2020 | 12 | 7 | 12 | 3.3  | 226 | 494 | 488 | 1014 | 9.8  | 308 | 2.2 |
| 2020 | 12 | 7 | 13 | 3.8  | 229 | 71  | 267 | 1013 | 9.8  | 301 | 2.6 |
| 2020 | 12 | 7 | 14 | 4.3  | 231 | 377 | 408 | 1013 | 9.4  | 306 | 2.6 |
| 2020 | 12 | 7 | 15 | 4.9  | 37  | 0   | 37  | 1013 | 8.8  | 317 | 2.6 |
| 2020 | 12 | 7 | 16 | 5    | 13  | 0   | 13  | 1013 | 7.3  | 332 | 2.2 |
| 2020 | 12 | 7 | 17 | 4.2  | 3   | 0   | 3   | 1014 | 5.4  | 346 | 2.2 |
| 2020 | 12 | 7 | 18 | 3.3  | 0   | 0   | 0   | 1014 | 4.1  | 355 | 2.3 |
| 2020 | 12 | 7 | 19 | 2.1  | 0   | 0   | 0   | 1015 | 2.7  | 360 | 2   |
| 2020 | 12 | 7 | 20 | 1.1  | 0   | 0   | 0   | 1015 | 1.7  | 4   | 1.7 |
| 2020 | 12 | 7 | 21 | 0.5  | 0   | 0   | 0   | 1015 | 1    | 4   | 1.7 |
| 2020 | 12 | 7 | 22 | 0.3  | 0   | 0   | 0   | 1015 | 0.5  | 3   | 1.6 |
| 2020 | 12 | 7 | 23 | 0.2  | 0   | 0   | 0   | 1015 | 0.9  | 357 | 1.9 |
| 2020 | 12 | 8 | 0  | 0    | 0   | 0   | 0   | 1015 | 1.1  | 357 | 2.3 |
| 2020 | 12 | 8 | 1  | -0.4 | 0   | 0   | 0   | 1015 | 0.6  | 359 | 2.3 |
| 2020 | 12 | 8 | 2  | -0.8 | 0   | 0   | 0   | 1015 | -0.2 | 1   | 1.9 |
| 2020 | 12 | 8 | 3  | -1   | 0   | 0   | 0   | 1016 | -0.6 | 2   | 1.7 |
| 2020 | 12 | 8 | 4  | -1.1 | 0   | 0   | 0   | 1016 | -0.5 | 0   | 1.7 |
| 2020 | 12 | 8 | 5  | -1.1 | 0   | 0   | 0   | 1016 | -0.2 | 359 | 1.8 |
| 2020 | 12 | 8 | 6  | -1.2 | 0   | 0   | 0   | 1016 | 0    | 358 | 1.8 |
| 2020 | 12 | 8 | 7  | -1.4 | 0   | 0   | 0   | 1016 | 0    | 359 | 1.8 |
| 2020 | 12 | 8 | 8  | -1   | 36  | 172 | 51  | 1016 | 1.3  | 2   | 2.2 |
| 2020 | 12 | 8 | 9  | -1.1 | 88  | 482 | 210 | 1016 | 3.1  | 359 | 2.9 |
| 2020 | 12 | 8 | 10 | -0.9 | 118 | 623 | 361 | 1016 | 4.6  | 346 | 3.1 |
| 2020 | 12 | 8 | 11 | -0.7 | 138 | 693 | 472 | 1015 | 5.4  | 334 | 3.4 |
| 2020 | 12 | 8 | 12 | -0.6 | 135 | 758 | 536 | 1015 | 5.9  | 329 | 3.6 |
| 2020 | 12 | 8 | 13 | -0.8 | 225 | 291 | 377 | 1014 | 6.1  | 325 | 3.8 |

|      |    |    |    |      |     |     |     |      |      |     |     |
|------|----|----|----|------|-----|-----|-----|------|------|-----|-----|
| 2020 | 12 | 8  | 14 | -1.1 | 180 | 24  | 192 | 1014 | 6    | 324 | 3.8 |
| 2020 | 12 | 8  | 15 | -1.4 | 114 | 613 | 339 | 1014 | 5.3  | 328 | 3.5 |
| 2020 | 12 | 8  | 16 | -1   | 62  | 0   | 62  | 1014 | 4.3  | 334 | 2.6 |
| 2020 | 12 | 8  | 17 | -0.7 | 10  | 0   | 10  | 1014 | 2    | 343 | 1.5 |
| 2020 | 12 | 8  | 18 | -2.3 | 0   | 0   | 0   | 1014 | 0.1  | 352 | 1.4 |
| 2020 | 12 | 8  | 19 | -3.1 | 0   | 0   | 0   | 1015 | -0.8 | 359 | 1.4 |
| 2020 | 12 | 8  | 20 | -4   | 0   | 0   | 0   | 1015 | -1.7 | 7   | 1.4 |
| 2020 | 12 | 8  | 21 | -4.9 | 0   | 0   | 0   | 1015 | -2.6 | 14  | 1.4 |
| 2020 | 12 | 8  | 22 | -5.8 | 0   | 0   | 0   | 1015 | -3.3 | 19  | 1.3 |
| 2020 | 12 | 8  | 23 | -6.4 | 0   | 0   | 0   | 1015 | -3.6 | 19  | 1.2 |
| 2020 | 12 | 9  | 0  | -6.8 | 0   | 0   | 0   | 1015 | -3.8 | 13  | 1.2 |
| 2020 | 12 | 9  | 1  | -7.1 | 0   | 0   | 0   | 1015 | -3.9 | 10  | 1.2 |
| 2020 | 12 | 9  | 2  | -7.2 | 0   | 0   | 0   | 1015 | -4   | 10  | 1.3 |
| 2020 | 12 | 9  | 3  | -7.4 | 0   | 0   | 0   | 1015 | -4   | 9   | 1.3 |
| 2020 | 12 | 9  | 4  | -7.5 | 0   | 0   | 0   | 1014 | -4   | 14  | 1.3 |
| 2020 | 12 | 9  | 5  | -7.5 | 0   | 0   | 0   | 1014 | -3.9 | 25  | 1.2 |
| 2020 | 12 | 9  | 6  | -7.4 | 0   | 0   | 0   | 1014 | -3.9 | 28  | 1.2 |
| 2020 | 12 | 9  | 7  | -7.3 | 0   | 0   | 0   | 1014 | -3.9 | 28  | 1.2 |
| 2020 | 12 | 9  | 8  | -6.8 | 17  | 0   | 17  | 1014 | -1.6 | 29  | 1.8 |
| 2020 | 12 | 9  | 9  | -6.8 | 68  | 616 | 223 | 1014 | 0.5  | 27  | 2.3 |
| 2020 | 12 | 9  | 10 | -7.1 | 88  | 758 | 381 | 1014 | 3.4  | 28  | 2.2 |
| 2020 | 12 | 9  | 11 | -7   | 101 | 819 | 495 | 1014 | 5.3  | 13  | 1.9 |
| 2020 | 12 | 9  | 12 | -6.3 | 103 | 859 | 556 | 1013 | 6.6  | 0   | 2.2 |
| 2020 | 12 | 9  | 13 | -5.6 | 104 | 853 | 550 | 1012 | 7.4  | 1   | 2.2 |
| 2020 | 12 | 9  | 14 | -5   | 100 | 805 | 477 | 1011 | 7.6  | 360 | 2.1 |
| 2020 | 12 | 9  | 15 | -3.9 | 89  | 714 | 351 | 1011 | 7.1  | 355 | 2   |
| 2020 | 12 | 9  | 16 | -0.2 | 66  | 549 | 190 | 1011 | 4.6  | 348 | 1.3 |
| 2020 | 12 | 9  | 17 | -2.8 | 22  | 174 | 32  | 1011 | 0.6  | 355 | 1.4 |
| 2020 | 12 | 9  | 18 | -4   | 0   | 0   | 0   | 1011 | -0.7 | 9   | 1.4 |
| 2020 | 12 | 9  | 19 | -4.8 | 0   | 0   | 0   | 1011 | -1.1 | 22  | 1.3 |
| 2020 | 12 | 9  | 20 | -5.5 | 0   | 0   | 0   | 1010 | -0.8 | 31  | 1.3 |
| 2020 | 12 | 9  | 21 | -5.9 | 0   | 0   | 0   | 1011 | -0.4 | 26  | 1.2 |
| 2020 | 12 | 9  | 22 | -5.8 | 0   | 0   | 0   | 1010 | -0.5 | 22  | 1.2 |
| 2020 | 12 | 9  | 23 | -5.5 | 0   | 0   | 0   | 1010 | -0.7 | 16  | 1.2 |
| 2020 | 12 | 10 | 0  | -4.9 | 0   | 0   | 0   | 1010 | -0.6 | 15  | 1.1 |
| 2020 | 12 | 10 | 1  | -4.2 | 0   | 0   | 0   | 1010 | -0.4 | 15  | 1.1 |
| 2020 | 12 | 10 | 2  | -3.6 | 0   | 0   | 0   | 1010 | -0.1 | 9   | 1   |
| 2020 | 12 | 10 | 3  | -3.5 | 0   | 0   | 0   | 1010 | -0.1 | 1   | 1.1 |
| 2020 | 12 | 10 | 4  | -3.8 | 0   | 0   | 0   | 1010 | -0.4 | 358 | 1.2 |
| 2020 | 12 | 10 | 5  | -3.8 | 0   | 0   | 0   | 1010 | -0.4 | 360 | 1.3 |
| 2020 | 12 | 10 | 6  | -4.2 | 0   | 0   | 0   | 1010 | -0.7 | 2   | 1.4 |
| 2020 | 12 | 10 | 7  | -4.5 | 0   | 0   | 0   | 1010 | -0.7 | 4   | 1.4 |
| 2020 | 12 | 10 | 8  | -2.9 | 5   | 0   | 5   | 1011 | 1.2  | 8   | 1.5 |
| 2020 | 12 | 10 | 9  | -4.1 | 16  | 0   | 16  | 1011 | 3.9  | 13  | 2.3 |
| 2020 | 12 | 10 | 10 | -2.7 | 58  | 0   | 58  | 1010 | 6    | 9   | 2.2 |
| 2020 | 12 | 10 | 11 | -1   | 169 | 9   | 173 | 1010 | 8.2  | 1   | 2.4 |
| 2020 | 12 | 10 | 12 | 0.4  | 195 | 17  | 203 | 1009 | 9.2  | 350 | 2.5 |
| 2020 | 12 | 10 | 13 | 1.4  | 220 | 50  | 245 | 1008 | 9.7  | 340 | 2.6 |
| 2020 | 12 | 10 | 14 | 1.9  | 189 | 521 | 433 | 1008 | 9.8  | 338 | 2.6 |
| 2020 | 12 | 10 | 15 | 2.4  | 154 | 126 | 200 | 1008 | 9.2  | 339 | 2.5 |

|      |    |    |    |      |     |     |     |      |      |     |     |
|------|----|----|----|------|-----|-----|-----|------|------|-----|-----|
| 2020 | 12 | 10 | 16 | 3.9  | 85  | 177 | 125 | 1009 | 7.2  | 344 | 1.3 |
| 2020 | 12 | 10 | 17 | 2.3  | 17  | 0   | 17  | 1009 | 4.5  | 353 | 1.2 |
| 2020 | 12 | 10 | 18 | 1.6  | 0   | 0   | 0   | 1009 | 3.8  | 0   | 1.2 |
| 2020 | 12 | 10 | 19 | 1.4  | 0   | 0   | 0   | 1009 | 3.6  | 8   | 1.2 |
| 2020 | 12 | 10 | 20 | 1.1  | 0   | 0   | 0   | 1009 | 3.6  | 13  | 1.1 |
| 2020 | 12 | 10 | 21 | 0.9  | 0   | 0   | 0   | 1009 | 3.8  | 17  | 1   |
| 2020 | 12 | 10 | 22 | 0.8  | 0   | 0   | 0   | 1009 | 3.7  | 13  | 0.9 |
| 2020 | 12 | 10 | 23 | 0.8  | 0   | 0   | 0   | 1009 | 3.5  | 7   | 0.9 |
| 2020 | 12 | 11 | 0  | 0.8  | 0   | 0   | 0   | 1009 | 3.3  | 6   | 1   |
| 2020 | 12 | 11 | 1  | 0.7  | 0   | 0   | 0   | 1009 | 2.5  | 5   | 1.1 |
| 2020 | 12 | 11 | 2  | 0.8  | 0   | 0   | 0   | 1009 | 1.9  | 6   | 1.2 |
| 2020 | 12 | 11 | 3  | 0.8  | 0   | 0   | 0   | 1009 | 1.5  | 5   | 1.2 |
| 2020 | 12 | 11 | 4  | 1    | 0   | 0   | 0   | 1008 | 1.9  | 7   | 1.1 |
| 2020 | 12 | 11 | 5  | 1.3  | 0   | 0   | 0   | 1008 | 2    | 8   | 1.1 |
| 2020 | 12 | 11 | 6  | 1.6  | 0   | 0   | 0   | 1008 | 2.1  | 24  | 1.1 |
| 2020 | 12 | 11 | 7  | 1.9  | 0   | 0   | 0   | 1008 | 2.1  | 42  | 1   |
| 2020 | 12 | 11 | 8  | 2.5  | 34  | 133 | 44  | 1008 | 3.1  | 54  | 0.8 |
| 2020 | 12 | 11 | 9  | 3.6  | 96  | 73  | 114 | 1008 | 5.7  | 56  | 1.3 |
| 2020 | 12 | 11 | 10 | 4.5  | 131 | 562 | 346 | 1008 | 8.2  | 28  | 1   |
| 2020 | 12 | 11 | 11 | 4.8  | 156 | 621 | 452 | 1007 | 10.2 | 325 | 1.3 |
| 2020 | 12 | 11 | 12 | 5    | 174 | 630 | 505 | 1007 | 10.9 | 315 | 1.6 |
| 2020 | 12 | 11 | 13 | 5.1  | 184 | 598 | 496 | 1006 | 11.2 | 309 | 1.8 |
| 2020 | 12 | 11 | 14 | 5.2  | 21  | 0   | 21  | 1005 | 11.1 | 308 | 2.1 |
| 2020 | 12 | 11 | 15 | 5.4  | 94  | 0   | 94  | 1005 | 10.6 | 311 | 2.3 |
| 2020 | 12 | 11 | 16 | 6.4  | 16  | 0   | 16  | 1005 | 8.8  | 323 | 1.1 |
| 2020 | 12 | 11 | 17 | 5.2  | 6   | 0   | 6   | 1006 | 6.6  | 338 | 1   |
| 2020 | 12 | 11 | 18 | 4.6  | 0   | 0   | 0   | 1006 | 6    | 352 | 1   |
| 2020 | 12 | 11 | 19 | 4.2  | 0   | 0   | 0   | 1006 | 5.5  | 0   | 1   |
| 2020 | 12 | 11 | 20 | 3.9  | 0   | 0   | 0   | 1006 | 5.2  | 359 | 1   |
| 2020 | 12 | 11 | 21 | 3.7  | 0   | 0   | 0   | 1006 | 4.7  | 351 | 1   |
| 2020 | 12 | 11 | 22 | 3.6  | 0   | 0   | 0   | 1006 | 4.4  | 345 | 1   |
| 2020 | 12 | 11 | 23 | 3.7  | 0   | 0   | 0   | 1006 | 4.2  | 335 | 1.1 |
| 2020 | 12 | 12 | 0  | 3.9  | 0   | 0   | 0   | 1006 | 4    | 331 | 1.1 |
| 2020 | 12 | 12 | 1  | 4    | 0   | 0   | 0   | 1006 | 4    | 331 | 1.2 |
| 2020 | 12 | 12 | 2  | 3.7  | 0   | 0   | 0   | 1006 | 3.9  | 331 | 1.3 |
| 2020 | 12 | 12 | 3  | 3.2  | 0   | 0   | 0   | 1006 | 3.7  | 332 | 1.7 |
| 2020 | 12 | 12 | 4  | 2.9  | 0   | 0   | 0   | 1006 | 4    | 338 | 2.1 |
| 2020 | 12 | 12 | 5  | 2.8  | 0   | 0   | 0   | 1006 | 3.9  | 346 | 2.4 |
| 2020 | 12 | 12 | 6  | 2.7  | 0   | 0   | 0   | 1006 | 4    | 352 | 2.9 |
| 2020 | 12 | 12 | 7  | 2.1  | 0   | 0   | 0   | 1006 | 2.7  | 358 | 2.4 |
| 2020 | 12 | 12 | 8  | 2.1  | 32  | 119 | 41  | 1007 | 3.5  | 3   | 2.7 |
| 2020 | 12 | 12 | 9  | 1.9  | 82  | 479 | 199 | 1007 | 5.3  | 1   | 3.4 |
| 2020 | 12 | 12 | 10 | 0.7  | 101 | 681 | 360 | 1007 | 7    | 354 | 4.4 |
| 2020 | 12 | 12 | 11 | 0.2  | 107 | 782 | 479 | 1007 | 7.9  | 350 | 4.7 |
| 2020 | 12 | 12 | 12 | -0.2 | 110 | 828 | 543 | 1006 | 8.4  | 348 | 4.8 |
| 2020 | 12 | 12 | 13 | -0.9 | 107 | 834 | 541 | 1006 | 8.7  | 347 | 4.8 |
| 2020 | 12 | 12 | 14 | -1.6 | 99  | 807 | 476 | 1006 | 8.4  | 346 | 4.6 |
| 2020 | 12 | 12 | 15 | -2.2 | 91  | 710 | 351 | 1006 | 7.6  | 347 | 4   |
| 2020 | 12 | 12 | 16 | -0.8 | 67  | 547 | 190 | 1006 | 5.8  | 351 | 2.3 |
| 2020 | 12 | 12 | 17 | -1.3 | 23  | 166 | 32  | 1006 | 2.2  | 0   | 1.3 |

|      |    |    |    |      |     |     |     |      |      |     |     |
|------|----|----|----|------|-----|-----|-----|------|------|-----|-----|
| 2020 | 12 | 12 | 18 | -2.7 | 0   | 0   | 0   | 1006 | 1.1  | 9   | 1.3 |
| 2020 | 12 | 12 | 19 | -3.8 | 0   | 0   | 0   | 1006 | 0.7  | 20  | 1.3 |
| 2020 | 12 | 12 | 20 | -4.9 | 0   | 0   | 0   | 1006 | 0.6  | 26  | 1.2 |
| 2020 | 12 | 12 | 21 | -5.1 | 0   | 0   | 0   | 1006 | 1    | 19  | 1.1 |
| 2020 | 12 | 12 | 22 | -4.8 | 0   | 0   | 0   | 1006 | 1.3  | 10  | 1   |
| 2020 | 12 | 12 | 23 | -5   | 0   | 0   | 0   | 1006 | 1.2  | 5   | 1   |
| 2020 | 12 | 13 | 0  | -4.9 | 0   | 0   | 0   | 1005 | 1    | 10  | 1   |
| 2020 | 12 | 13 | 1  | -5   | 0   | 0   | 0   | 1006 | 1.3  | 359 | 0.9 |
| 2020 | 12 | 13 | 2  | -5.3 | 0   | 0   | 0   | 1006 | 1.7  | 332 | 0.8 |
| 2020 | 12 | 13 | 3  | -5.9 | 0   | 0   | 0   | 1006 | 1.9  | 316 | 0.7 |
| 2020 | 12 | 13 | 4  | -6.4 | 0   | 0   | 0   | 1006 | 2.1  | 295 | 0.3 |
| 2020 | 12 | 13 | 5  | -6.5 | 0   | 0   | 0   | 1006 | 1.4  | 152 | 0.3 |
| 2020 | 12 | 13 | 6  | -6.2 | 0   | 0   | 0   | 1005 | 0.5  | 140 | 0.9 |
| 2020 | 12 | 13 | 7  | -5.5 | 0   | 0   | 0   | 1005 | -0.4 | 146 | 1.1 |
| 2020 | 12 | 13 | 8  | -2.6 | 26  | 18  | 28  | 1005 | 1    | 155 | 1.2 |
| 2020 | 12 | 13 | 9  | -2.7 | 93  | 183 | 137 | 1005 | 3.6  | 164 | 2.4 |
| 2020 | 12 | 13 | 10 | -1.9 | 117 | 490 | 302 | 1005 | 5.7  | 184 | 3.1 |
| 2020 | 12 | 13 | 11 | 0.4  | 194 | 317 | 344 | 1004 | 7.9  | 210 | 3.9 |
| 2020 | 12 | 13 | 12 | 3.2  | 212 | 523 | 485 | 1003 | 9.1  | 229 | 4.2 |
| 2020 | 12 | 13 | 13 | 5.6  | 44  | 0   | 44  | 1002 | 10.3 | 248 | 4.5 |
| 2020 | 12 | 13 | 14 | 5.9  | 169 | 13  | 175 | 1002 | 10.7 | 272 | 5.2 |
| 2020 | 12 | 13 | 15 | 5.5  | 26  | 0   | 26  | 1003 | 8.9  | 306 | 5.8 |
| 2020 | 12 | 13 | 16 | 4.1  | 26  | 0   | 26  | 1004 | 5.7  | 332 | 6.4 |
| 2020 | 12 | 13 | 17 | 2    | 6   | 0   | 6   | 1006 | 3.6  | 341 | 6.1 |
| 2020 | 12 | 13 | 18 | 0.3  | 0   | 0   | 0   | 1007 | 2.3  | 343 | 5.7 |
| 2020 | 12 | 13 | 19 | -1.1 | 0   | 0   | 0   | 1008 | 1.6  | 343 | 5.6 |
| 2020 | 12 | 13 | 20 | -2.8 | 0   | 0   | 0   | 1008 | 0.8  | 342 | 5.4 |
| 2020 | 12 | 13 | 21 | -4.5 | 0   | 0   | 0   | 1009 | -0.1 | 343 | 5.2 |
| 2020 | 12 | 13 | 22 | -5.5 | 0   | 0   | 0   | 1010 | -0.8 | 344 | 5.2 |
| 2020 | 12 | 13 | 23 | -6   | 0   | 0   | 0   | 1010 | -1.2 | 346 | 5.2 |
| 2020 | 12 | 14 | 0  | -6.2 | 0   | 0   | 0   | 1011 | -1.4 | 347 | 5   |
| 2020 | 12 | 14 | 1  | -6.2 | 0   | 0   | 0   | 1011 | -1.5 | 347 | 4.8 |
| 2020 | 12 | 14 | 2  | -6.2 | 0   | 0   | 0   | 1012 | -1.7 | 351 | 4.9 |
| 2020 | 12 | 14 | 3  | -6.4 | 0   | 0   | 0   | 1012 | -1.9 | 354 | 5   |
| 2020 | 12 | 14 | 4  | -6.7 | 0   | 0   | 0   | 1012 | -2.3 | 356 | 5.1 |
| 2020 | 12 | 14 | 5  | -7.3 | 0   | 0   | 0   | 1012 | -2.9 | 359 | 5.3 |
| 2020 | 12 | 14 | 6  | -7.8 | 0   | 0   | 0   | 1013 | -3.7 | 3   | 5   |
| 2020 | 12 | 14 | 7  | -8.1 | 0   | 0   | 0   | 1014 | -4.3 | 7   | 4.5 |
| 2020 | 12 | 14 | 8  | -8.4 | 26  | 79  | 32  | 1015 | -4.2 | 8   | 4.7 |
| 2020 | 12 | 14 | 9  | -8.6 | 77  | 560 | 211 | 1015 | -3.4 | 4   | 5.2 |
| 2020 | 12 | 14 | 10 | -8.5 | 121 | 457 | 294 | 1016 | -2.6 | 358 | 5.5 |
| 2020 | 12 | 14 | 11 | -8.4 | 107 | 815 | 492 | 1015 | -2.1 | 355 | 5.6 |
| 2020 | 12 | 14 | 12 | -8.3 | 104 | 872 | 558 | 1014 | -1.8 | 353 | 5.5 |
| 2020 | 12 | 14 | 13 | -8   | 107 | 861 | 553 | 1013 | -1.5 | 352 | 5.3 |
| 2020 | 12 | 14 | 14 | -7.7 | 183 | 352 | 347 | 1013 | -1.3 | 348 | 5   |
| 2020 | 12 | 14 | 15 | -7.4 | 138 | 320 | 255 | 1014 | -1.5 | 348 | 4.9 |
| 2020 | 12 | 14 | 16 | -7.3 | 82  | 478 | 191 | 1014 | -2.1 | 352 | 4.6 |
| 2020 | 12 | 14 | 17 | -7.2 | 27  | 101 | 33  | 1015 | -3   | 357 | 3.8 |
| 2020 | 12 | 14 | 18 | -7.1 | 0   | 0   | 0   | 1016 | -3.4 | 0   | 3.5 |
| 2020 | 12 | 14 | 19 | -6.9 | 0   | 0   | 0   | 1016 | -3.4 | 1   | 3.4 |

|      |    |    |    |       |     |     |     |      |      |     |     |
|------|----|----|----|-------|-----|-----|-----|------|------|-----|-----|
| 2020 | 12 | 14 | 20 | -6.8  | 0   | 0   | 0   | 1016 | -3.5 | 2   | 3.2 |
| 2020 | 12 | 14 | 21 | -6.7  | 0   | 0   | 0   | 1016 | -3.6 | 3   | 3   |
| 2020 | 12 | 14 | 22 | -6.6  | 0   | 0   | 0   | 1016 | -3.4 | 4   | 3.1 |
| 2020 | 12 | 14 | 23 | -6.5  | 0   | 0   | 0   | 1016 | -3.5 | 6   | 2.9 |
| 2020 | 12 | 15 | 0  | -6.5  | 0   | 0   | 0   | 1016 | -3.6 | 9   | 3   |
| 2020 | 12 | 15 | 1  | -6.6  | 0   | 0   | 0   | 1016 | -3.9 | 12  | 3   |
| 2020 | 12 | 15 | 2  | -6.8  | 0   | 0   | 0   | 1016 | -4   | 12  | 3.4 |
| 2020 | 12 | 15 | 3  | -7.1  | 0   | 0   | 0   | 1016 | -4.3 | 13  | 3.6 |
| 2020 | 12 | 15 | 4  | -7.6  | 0   | 0   | 0   | 1017 | -4.5 | 15  | 4   |
| 2020 | 12 | 15 | 5  | -8.5  | 0   | 0   | 0   | 1017 | -5   | 18  | 4.1 |
| 2020 | 12 | 15 | 6  | -9.7  | 0   | 0   | 0   | 1017 | -5.7 | 21  | 4.2 |
| 2020 | 12 | 15 | 7  | -10.9 | 0   | 0   | 0   | 1018 | -6.4 | 22  | 4   |
| 2020 | 12 | 15 | 8  | -11.7 | 31  | 184 | 44  | 1018 | -6.3 | 21  | 4   |
| 2020 | 12 | 15 | 9  | -11.4 | 78  | 546 | 208 | 1019 | -5.3 | 17  | 4   |
| 2020 | 12 | 15 | 10 | -10.5 | 105 | 700 | 367 | 1019 | -4.1 | 9   | 4   |
| 2020 | 12 | 15 | 11 | -9.4  | 116 | 787 | 487 | 1019 | -2.8 | 0   | 4.2 |
| 2020 | 12 | 15 | 12 | -8.5  | 104 | 866 | 555 | 1018 | -1.8 | 354 | 4.3 |
| 2020 | 12 | 15 | 13 | -7.9  | 113 | 840 | 549 | 1017 | -1.3 | 351 | 4.2 |
| 2020 | 12 | 15 | 14 | -7.5  | 114 | 788 | 481 | 1017 | -1   | 352 | 4   |
| 2020 | 12 | 15 | 15 | -7.1  | 97  | 710 | 357 | 1017 | -0.9 | 354 | 3.7 |
| 2020 | 12 | 15 | 16 | -6.6  | 76  | 524 | 195 | 1017 | -1.2 | 359 | 3.1 |
| 2020 | 12 | 15 | 17 | -5.6  | 26  | 149 | 35  | 1017 | -2.5 | 10  | 1.6 |
| 2020 | 12 | 15 | 18 | -5.9  | 0   | 0   | 0   | 1017 | -3   | 18  | 1.7 |
| 2020 | 12 | 15 | 19 | -6.1  | 0   | 0   | 0   | 1017 | -3.2 | 21  | 1.7 |
| 2020 | 12 | 15 | 20 | -6.3  | 0   | 0   | 0   | 1017 | -3.5 | 23  | 1.7 |
| 2020 | 12 | 15 | 21 | -6.6  | 0   | 0   | 0   | 1017 | -3.8 | 23  | 1.8 |
| 2020 | 12 | 15 | 22 | -7.3  | 0   | 0   | 0   | 1017 | -3.7 | 23  | 2.1 |
| 2020 | 12 | 15 | 23 | -7.7  | 0   | 0   | 0   | 1017 | -3.9 | 24  | 2.1 |
| 2020 | 12 | 16 | 0  | -8    | 0   | 0   | 0   | 1017 | -4.1 | 24  | 2.1 |
| 2020 | 12 | 16 | 1  | -8.1  | 0   | 0   | 0   | 1017 | -4.2 | 23  | 2.2 |
| 2020 | 12 | 16 | 2  | -8.2  | 0   | 0   | 0   | 1017 | -4.3 | 21  | 2.3 |
| 2020 | 12 | 16 | 3  | -8.2  | 0   | 0   | 0   | 1017 | -4.3 | 19  | 2.4 |
| 2020 | 12 | 16 | 4  | -8.2  | 0   | 0   | 0   | 1017 | -4.4 | 16  | 2.6 |
| 2020 | 12 | 16 | 5  | -8.2  | 0   | 0   | 0   | 1017 | -4.6 | 12  | 2.6 |
| 2020 | 12 | 16 | 6  | -8.2  | 0   | 0   | 0   | 1017 | -5   | 10  | 2.5 |
| 2020 | 12 | 16 | 7  | -8.4  | 0   | 0   | 0   | 1017 | -5.4 | 9   | 2.6 |
| 2020 | 12 | 16 | 8  | -8.6  | 31  | 135 | 40  | 1018 | -5.3 | 10  | 3.2 |
| 2020 | 12 | 16 | 9  | -8.7  | 86  | 477 | 199 | 1018 | -4.6 | 8   | 3.7 |
| 2020 | 12 | 16 | 10 | -8.8  | 114 | 659 | 360 | 1018 | -4   | 4   | 4   |
| 2020 | 12 | 16 | 11 | -8.5  | 120 | 769 | 481 | 1019 | -3.1 | 356 | 4.3 |
| 2020 | 12 | 16 | 12 | -7.6  | 130 | 792 | 541 | 1018 | -2.2 | 348 | 4.5 |
| 2020 | 12 | 16 | 13 | -6.7  | 139 | 772 | 539 | 1018 | -1.3 | 342 | 4.5 |
| 2020 | 12 | 16 | 14 | -6.1  | 131 | 724 | 469 | 1017 | -0.3 | 338 | 4.7 |
| 2020 | 12 | 16 | 15 | -5.7  | 119 | 626 | 348 | 1017 | -0.1 | 336 | 4.6 |
| 2020 | 12 | 16 | 16 | -5.2  | 52  | 0   | 52  | 1017 | -0.5 | 340 | 4   |
| 2020 | 12 | 16 | 17 | -4.8  | 28  | 116 | 35  | 1017 | -1.3 | 347 | 3.3 |
| 2020 | 12 | 16 | 18 | -4.9  | 0   | 0   | 0   | 1017 | -1.9 | 353 | 3.1 |
| 2020 | 12 | 16 | 19 | -5    | 0   | 0   | 0   | 1017 | -2.4 | 355 | 2.9 |
| 2020 | 12 | 16 | 20 | -5    | 0   | 0   | 0   | 1018 | -2.6 | 355 | 2.9 |
| 2020 | 12 | 16 | 21 | -5    | 0   | 0   | 0   | 1017 | -2.6 | 353 | 2.8 |



|      |    |    |    |      |     |     |     |      |      |     |     |
|------|----|----|----|------|-----|-----|-----|------|------|-----|-----|
| 2020 | 12 | 16 | 22 | -5   | 0   | 0   | 0   | 1017 | -2.6 | 353 | 2.7 |
| 2020 | 12 | 16 | 23 | -5   | 0   | 0   | 0   | 1017 | -2.8 | 353 | 2.6 |
| 2020 | 12 | 17 | 0  | -5.1 | 0   | 0   | 0   | 1017 | -2.9 | 353 | 2.5 |
| 2020 | 12 | 17 | 1  | -5.3 | 0   | 0   | 0   | 1017 | -3.4 | 354 | 2.3 |
| 2020 | 12 | 17 | 2  | -5.4 | 0   | 0   | 0   | 1018 | -3.3 | 357 | 2.7 |
| 2020 | 12 | 17 | 3  | -5.5 | 0   | 0   | 0   | 1018 | -3.3 | 360 | 3   |
| 2020 | 12 | 17 | 4  | -5.7 | 0   | 0   | 0   | 1017 | -3.6 | 3   | 2.9 |
| 2020 | 12 | 17 | 5  | -5.9 | 0   | 0   | 0   | 1017 | -3.9 | 5   | 2.7 |
| 2020 | 12 | 17 | 6  | -6.1 | 0   | 0   | 0   | 1017 | -4.2 | 8   | 2.4 |
| 2020 | 12 | 17 | 7  | -6.3 | 0   | 0   | 0   | 1018 | -4.6 | 9   | 1.9 |
| 2020 | 12 | 17 | 8  | -6.4 | 27  | 229 | 43  | 1018 | -4.3 | 11  | 2.2 |
| 2020 | 12 | 17 | 9  | -5.6 | 67  | 597 | 207 | 1018 | -2.5 | 6   | 2.3 |
| 2020 | 12 | 17 | 10 | -4.6 | 88  | 750 | 367 | 1018 | -0.1 | 346 | 2.7 |
| 2020 | 12 | 17 | 11 | -4.1 | 99  | 823 | 485 | 1018 | 1.3  | 334 | 3.1 |
| 2020 | 12 | 17 | 12 | -3.8 | 94  | 885 | 553 | 1017 | 2.1  | 332 | 3.3 |
| 2020 | 12 | 17 | 13 | -3.7 | 92  | 889 | 553 | 1017 | 2.5  | 333 | 3.2 |
| 2020 | 12 | 17 | 14 | -3.5 | 86  | 865 | 489 | 1016 | 3    | 336 | 3.1 |
| 2020 | 12 | 17 | 15 | -3.3 | 85  | 757 | 362 | 1016 | 2.9  | 337 | 2.9 |
| 2020 | 12 | 17 | 16 | -2   | 63  | 593 | 199 | 1016 | 1.6  | 344 | 1.5 |
| 2020 | 12 | 17 | 17 | -2.9 | 24  | 233 | 38  | 1016 | -0.7 | 360 | 1.1 |
| 2020 | 12 | 17 | 18 | -3.6 | 0   | 0   | 0   | 1016 | -1.5 | 11  | 1.1 |
| 2020 | 12 | 17 | 19 | -4   | 0   | 0   | 0   | 1016 | -1.9 | 16  | 1   |
| 2020 | 12 | 17 | 20 | -4.1 | 0   | 0   | 0   | 1016 | -1.9 | 19  | 0.9 |
| 2020 | 12 | 17 | 21 | -4.1 | 0   | 0   | 0   | 1016 | -1.6 | 19  | 0.8 |
| 2020 | 12 | 17 | 22 | -4   | 0   | 0   | 0   | 1016 | -1.4 | 15  | 0.8 |
| 2020 | 12 | 17 | 23 | -4.1 | 0   | 0   | 0   | 1016 | -1.2 | 4   | 0.6 |
| 2020 | 12 | 18 | 0  | -4   | 0   | 0   | 0   | 1016 | -0.9 | 345 | 0.6 |
| 2020 | 12 | 18 | 1  | -3.8 | 0   | 0   | 0   | 1016 | -0.8 | 327 | 0.7 |
| 2020 | 12 | 18 | 2  | -3.6 | 0   | 0   | 0   | 1016 | -0.6 | 319 | 0.8 |
| 2020 | 12 | 18 | 3  | -3.3 | 0   | 0   | 0   | 1015 | -0.5 | 313 | 0.9 |
| 2020 | 12 | 18 | 4  | -2.8 | 0   | 0   | 0   | 1015 | -0.4 | 309 | 1   |
| 2020 | 12 | 18 | 5  | -2.5 | 0   | 0   | 0   | 1015 | -0.2 | 306 | 1.1 |
| 2020 | 12 | 18 | 6  | -2.3 | 0   | 0   | 0   | 1015 | 0.1  | 300 | 1.1 |
| 2020 | 12 | 18 | 7  | -2.2 | 0   | 0   | 0   | 1015 | 0.2  | 292 | 1.1 |
| 2020 | 12 | 18 | 8  | -1.2 | 12  | 0   | 12  | 1015 | 1.1  | 286 | 1.1 |
| 2020 | 12 | 18 | 9  | 0.4  | 100 | 353 | 182 | 1015 | 3.4  | 283 | 1.3 |
| 2020 | 12 | 18 | 10 | -1   | 142 | 509 | 330 | 1015 | 5.4  | 286 | 2.9 |
| 2020 | 12 | 18 | 11 | -1.6 | 188 | 328 | 342 | 1015 | 6.4  | 293 | 3.9 |
| 2020 | 12 | 18 | 12 | -1.5 | 208 | 539 | 487 | 1014 | 6.8  | 299 | 4.4 |
| 2020 | 12 | 18 | 13 | -0.9 | 231 | 482 | 481 | 1013 | 6.7  | 306 | 4.7 |
| 2020 | 12 | 18 | 14 | -0.1 | 37  | 0   | 37  | 1013 | 6.1  | 317 | 4.6 |
| 2020 | 12 | 18 | 15 | 0.6  | 26  | 0   | 26  | 1014 | 4.7  | 330 | 4.1 |
| 2020 | 12 | 18 | 16 | 0.7  | 88  | 57  | 101 | 1014 | 3    | 342 | 3.3 |
| 2020 | 12 | 18 | 17 | -0.2 | 23  | 48  | 26  | 1015 | 0.8  | 351 | 2.4 |
| 2020 | 12 | 18 | 18 | -1.3 | 0   | 0   | 0   | 1015 | 0.1  | 353 | 2.4 |
| 2020 | 12 | 18 | 19 | -2.1 | 0   | 0   | 0   | 1016 | -0.1 | 351 | 2.9 |
| 2020 | 12 | 18 | 20 | -2.7 | 0   | 0   | 0   | 1016 | -0.6 | 350 | 2.8 |
| 2020 | 12 | 18 | 21 | -3   | 0   | 0   | 0   | 1016 | -0.7 | 349 | 2.8 |
| 2020 | 12 | 18 | 22 | -3.2 | 0   | 0   | 0   | 1017 | -0.6 | 347 | 3.1 |
| 2020 | 12 | 18 | 23 | -3.5 | 0   | 0   | 0   | 1017 | -0.7 | 345 | 3.4 |

|      |    |    |    |       |     |     |     |      |      |     |     |
|------|----|----|----|-------|-----|-----|-----|------|------|-----|-----|
| 2020 | 12 | 19 | 0  | -4.1  | 0   | 0   | 0   | 1017 | -0.8 | 345 | 3.6 |
| 2020 | 12 | 19 | 1  | -4.9  | 0   | 0   | 0   | 1017 | -1.1 | 346 | 3.8 |
| 2020 | 12 | 19 | 2  | -5.4  | 0   | 0   | 0   | 1018 | -1.5 | 351 | 3.9 |
| 2020 | 12 | 19 | 3  | -5.6  | 0   | 0   | 0   | 1018 | -1.9 | 355 | 3.9 |
| 2020 | 12 | 19 | 4  | -5.7  | 0   | 0   | 0   | 1018 | -2.3 | 356 | 3.9 |
| 2020 | 12 | 19 | 5  | -6.1  | 0   | 0   | 0   | 1018 | -2.8 | 356 | 3.8 |
| 2020 | 12 | 19 | 6  | -6.7  | 0   | 0   | 0   | 1019 | -3.3 | 359 | 3.9 |
| 2020 | 12 | 19 | 7  | -8.1  | 0   | 0   | 0   | 1019 | -3.9 | 2   | 4   |
| 2020 | 12 | 19 | 8  | -9.9  | 26  | 284 | 44  | 1019 | -4   | 1   | 4.3 |
| 2020 | 12 | 19 | 9  | -11.4 | 56  | 707 | 220 | 1020 | -3.1 | 360 | 4.9 |
| 2020 | 12 | 19 | 10 | -12.3 | 65  | 882 | 391 | 1020 | -1.8 | 358 | 5.2 |
| 2020 | 12 | 19 | 11 | -12.8 | 71  | 952 | 515 | 1020 | -0.6 | 356 | 5.5 |
| 2020 | 12 | 19 | 12 | -12.7 | 78  | 967 | 578 | 1019 | 0.2  | 355 | 5.5 |
| 2020 | 12 | 19 | 13 | -12.1 | 77  | 968 | 578 | 1019 | 0.8  | 352 | 5.3 |
| 2020 | 12 | 19 | 14 | -11.4 | 74  | 941 | 513 | 1019 | 1    | 350 | 5.2 |
| 2020 | 12 | 19 | 15 | -10.4 | 69  | 848 | 381 | 1019 | 0.5  | 350 | 5   |
| 2020 | 12 | 19 | 16 | -8.9  | 55  | 698 | 215 | 1019 | -0.6 | 351 | 4   |
| 2020 | 12 | 19 | 17 | -7    | 24  | 311 | 43  | 1019 | -2.8 | 356 | 2.3 |
| 2020 | 12 | 19 | 18 | -6.5  | 0   | 0   | 0   | 1019 | -3.3 | 2   | 1.9 |
| 2020 | 12 | 19 | 19 | -6.6  | 0   | 0   | 0   | 1019 | -3.8 | 5   | 1.6 |
| 2020 | 12 | 19 | 20 | -7    | 0   | 0   | 0   | 1019 | -4.4 | 6   | 1.4 |
| 2020 | 12 | 19 | 21 | -7.5  | 0   | 0   | 0   | 1019 | -4.8 | 6   | 1.3 |
| 2020 | 12 | 19 | 22 | -7.9  | 0   | 0   | 0   | 1019 | -5   | 3   | 1.2 |
| 2020 | 12 | 19 | 23 | -8.1  | 0   | 0   | 0   | 1019 | -4.9 | 357 | 1.2 |
| 2020 | 12 | 20 | 0  | -8.2  | 0   | 0   | 0   | 1019 | -4.6 | 347 | 1.1 |
| 2020 | 12 | 20 | 1  | -7.5  | 0   | 0   | 0   | 1019 | -3.9 | 341 | 1.1 |
| 2020 | 12 | 20 | 2  | -6.5  | 0   | 0   | 0   | 1019 | -3.3 | 337 | 1.1 |
| 2020 | 12 | 20 | 3  | -5.6  | 0   | 0   | 0   | 1019 | -2.9 | 336 | 1.1 |
| 2020 | 12 | 20 | 4  | -4.7  | 0   | 0   | 0   | 1019 | -2.7 | 341 | 1.2 |
| 2020 | 12 | 20 | 5  | -3.9  | 0   | 0   | 0   | 1018 | -2.5 | 354 | 1.4 |
| 2020 | 12 | 20 | 6  | -3.7  | 0   | 0   | 0   | 1019 | -2.4 | 5   | 1.7 |
| 2020 | 12 | 20 | 7  | -4.1  | 0   | 0   | 0   | 1019 | -2.8 | 14  | 1.9 |
| 2020 | 12 | 20 | 8  | -4.2  | 20  | 0   | 20  | 1019 | -2.2 | 20  | 2.4 |
| 2020 | 12 | 20 | 9  | -4.4  | 75  | 508 | 192 | 1020 | -0.9 | 19  | 3   |
| 2020 | 12 | 20 | 10 | -4.5  | 139 | 322 | 257 | 1020 | 0.7  | 7   | 3.3 |
| 2020 | 12 | 20 | 11 | -4.2  | 108 | 778 | 471 | 1019 | 2    | 356 | 3.6 |
| 2020 | 12 | 20 | 12 | -4    | 223 | 276 | 366 | 1018 | 2.7  | 345 | 3.6 |
| 2020 | 12 | 20 | 13 | -3.9  | 206 | 372 | 398 | 1018 | 3    | 337 | 3.6 |
| 2020 | 12 | 20 | 14 | -3.8  | 111 | 777 | 473 | 1018 | 2.8  | 332 | 3.3 |
| 2020 | 12 | 20 | 15 | -3.6  | 154 | 81  | 183 | 1018 | 2.3  | 328 | 2.9 |
| 2020 | 12 | 20 | 16 | -2.4  | 86  | 27  | 93  | 1018 | 1.1  | 332 | 1.5 |
| 2020 | 12 | 20 | 17 | -3    | 27  | 171 | 38  | 1018 | -1   | 344 | 1   |
| 2020 | 12 | 20 | 18 | -3.9  | 0   | 0   | 0   | 1018 | -1.8 | 355 | 1   |
| 2020 | 12 | 20 | 19 | -4.2  | 0   | 0   | 0   | 1018 | -2.1 | 4   | 1   |
| 2020 | 12 | 20 | 20 | -4.3  | 0   | 0   | 0   | 1018 | -2.3 | 8   | 1   |
| 2020 | 12 | 20 | 21 | -4.4  | 0   | 0   | 0   | 1019 | -2.3 | 11  | 1   |
| 2020 | 12 | 20 | 22 | -4.6  | 0   | 0   | 0   | 1019 | -2.6 | 14  | 1   |
| 2020 | 12 | 20 | 23 | -5.2  | 0   | 0   | 0   | 1018 | -3.1 | 16  | 1.1 |
| 2020 | 12 | 21 | 0  | -5.7  | 0   | 0   | 0   | 1018 | -3.4 | 16  | 1.1 |
| 2020 | 12 | 21 | 1  | -5.9  | 0   | 0   | 0   | 1018 | -3.4 | 18  | 1.1 |

|      |    |    |    |      |     |     |     |      |      |     |     |
|------|----|----|----|------|-----|-----|-----|------|------|-----|-----|
| 2020 | 12 | 21 | 2  | -6.2 | 0   | 0   | 0   | 1018 | -3.5 | 22  | 1   |
| 2020 | 12 | 21 | 3  | -6.3 | 0   | 0   | 0   | 1017 | -3.6 | 24  | 0.9 |
| 2020 | 12 | 21 | 4  | -6.1 | 0   | 0   | 0   | 1017 | -3.4 | 24  | 0.8 |
| 2020 | 12 | 21 | 5  | -5.9 | 0   | 0   | 0   | 1017 | -3.1 | 25  | 0.5 |
| 2020 | 12 | 21 | 6  | -5.5 | 0   | 0   | 0   | 1017 | -2.9 | 329 | 0.4 |
| 2020 | 12 | 21 | 7  | -5.1 | 0   | 0   | 0   | 1017 | -2.9 | 313 | 0.6 |
| 2020 | 12 | 21 | 8  | -4.5 | 24  | 119 | 31  | 1017 | -2.1 | 307 | 0.8 |
| 2020 | 12 | 21 | 9  | -2.6 | 81  | 445 | 182 | 1017 | 0.6  | 295 | 1   |
| 2020 | 12 | 21 | 10 | -2.6 | 108 | 0   | 108 | 1017 | 3.6  | 282 | 1.9 |
| 2020 | 12 | 21 | 11 | -2.4 | 192 | 47  | 213 | 1017 | 5.4  | 285 | 2.8 |
| 2020 | 12 | 21 | 12 | -2.3 | 215 | 323 | 382 | 1016 | 5.8  | 290 | 3.2 |
| 2020 | 12 | 21 | 13 | -2.1 | 231 | 97  | 281 | 1015 | 6    | 295 | 3.4 |
| 2020 | 12 | 21 | 14 | -1.9 | 114 | 0   | 114 | 1015 | 5.7  | 298 | 3.4 |
| 2020 | 12 | 21 | 15 | -1.2 | 156 | 104 | 194 | 1015 | 4.8  | 303 | 2.6 |
| 2020 | 12 | 21 | 16 | -0.6 | 90  | 151 | 125 | 1015 | 2.5  | 309 | 1.5 |
| 2020 | 12 | 21 | 17 | -2.8 | 26  | 157 | 36  | 1015 | -0.2 | 314 | 1.4 |
| 2020 | 12 | 21 | 18 | -3.4 | 0   | 0   | 0   | 1015 | -0.6 | 317 | 1.3 |
| 2020 | 12 | 21 | 19 | -3.5 | 0   | 0   | 0   | 1016 | -0.3 | 318 | 1.3 |
| 2020 | 12 | 21 | 20 | -3.5 | 0   | 0   | 0   | 1015 | 0    | 317 | 1.2 |
| 2020 | 12 | 21 | 21 | -3.5 | 0   | 0   | 0   | 1015 | 0.3  | 316 | 1.1 |
| 2020 | 12 | 21 | 22 | -3.4 | 0   | 0   | 0   | 1015 | 0.5  | 318 | 1.1 |
| 2020 | 12 | 21 | 23 | -3.4 | 0   | 0   | 0   | 1015 | 0.5  | 322 | 1   |
| 2020 | 12 | 22 | 0  | -3.4 | 0   | 0   | 0   | 1015 | 0.5  | 324 | 1   |
| 2020 | 12 | 22 | 1  | -3.4 | 0   | 0   | 0   | 1015 | 0.5  | 324 | 1   |
| 2020 | 12 | 22 | 2  | -3.3 | 0   | 0   | 0   | 1015 | 0.6  | 325 | 1   |
| 2020 | 12 | 22 | 3  | -3.3 | 0   | 0   | 0   | 1014 | 0.6  | 325 | 0.9 |
| 2020 | 12 | 22 | 4  | -3.3 | 0   | 0   | 0   | 1014 | 0.6  | 322 | 0.9 |
| 2020 | 12 | 22 | 5  | -3.3 | 0   | 0   | 0   | 1014 | 1.1  | 325 | 0.8 |
| 2020 | 12 | 22 | 6  | -3.2 | 0   | 0   | 0   | 1014 | 1.7  | 332 | 0.7 |
| 2020 | 12 | 22 | 7  | -3.3 | 0   | 0   | 0   | 1014 | 1.6  | 346 | 0.6 |
| 2020 | 12 | 22 | 8  | -2.9 | 15  | 0   | 15  | 1014 | 2    | 3   | 0.4 |
| 2020 | 12 | 22 | 9  | -1.6 | 102 | 257 | 160 | 1014 | 3    | 19  | 0.3 |
| 2020 | 12 | 22 | 10 | -1.1 | 157 | 408 | 307 | 1014 | 4.9  | 292 | 0.7 |
| 2020 | 12 | 22 | 11 | -0.3 | 205 | 113 | 257 | 1014 | 6.2  | 279 | 1.5 |
| 2020 | 12 | 22 | 12 | 0.3  | 172 | 4   | 174 | 1013 | 6.9  | 278 | 2.1 |
| 2020 | 12 | 22 | 13 | 0.6  | 215 | 45  | 238 | 1012 | 7.2  | 281 | 2.5 |
| 2020 | 12 | 22 | 14 | 0.8  | 208 | 141 | 274 | 1012 | 7.2  | 286 | 2.5 |
| 2020 | 12 | 22 | 15 | 2.2  | 157 | 420 | 312 | 1012 | 6.1  | 293 | 1.4 |
| 2020 | 12 | 22 | 16 | 0.6  | 100 | 303 | 171 | 1012 | 3.6  | 302 | 1.1 |
| 2020 | 12 | 22 | 17 | -1   | 22  | 74  | 27  | 1013 | 2.3  | 307 | 1.3 |
| 2020 | 12 | 22 | 18 | -1   | 0   | 0   | 0   | 1013 | 2.1  | 308 | 1.1 |
| 2020 | 12 | 22 | 19 | -1   | 0   | 0   | 0   | 1013 | 2.3  | 306 | 1   |
| 2020 | 12 | 22 | 20 | -1   | 0   | 0   | 0   | 1014 | 2.9  | 299 | 0.9 |
| 2020 | 12 | 22 | 21 | -1   | 0   | 0   | 0   | 1014 | 2.9  | 285 | 0.8 |
| 2020 | 12 | 22 | 22 | -0.9 | 0   | 0   | 0   | 1014 | 2.7  | 270 | 0.7 |
| 2020 | 12 | 22 | 23 | -0.9 | 0   | 0   | 0   | 1014 | 2.9  | 256 | 0.6 |
| 2020 | 12 | 23 | 0  | -0.9 | 0   | 0   | 0   | 1013 | 2.9  | 234 | 0.5 |
| 2020 | 12 | 23 | 1  | -0.8 | 0   | 0   | 0   | 1014 | 2.2  | 216 | 0.6 |
| 2020 | 12 | 23 | 2  | -0.8 | 0   | 0   | 0   | 1014 | 2.1  | 208 | 0.6 |
| 2020 | 12 | 23 | 3  | -0.7 | 0   | 0   | 0   | 1013 | 2.1  | 174 | 0.5 |

|      |    |    |    |      |     |     |     |      |      |     |     |
|------|----|----|----|------|-----|-----|-----|------|------|-----|-----|
| 2020 | 12 | 23 | 4  | -0.7 | 0   | 0   | 0   | 1013 | 2    | 159 | 0.6 |
| 2020 | 12 | 23 | 5  | -0.7 | 0   | 0   | 0   | 1013 | 2    | 160 | 0.8 |
| 2020 | 12 | 23 | 6  | -0.7 | 0   | 0   | 0   | 1013 | 1.8  | 159 | 0.8 |
| 2020 | 12 | 23 | 7  | -0.7 | 0   | 0   | 0   | 1013 | 1.4  | 140 | 0.8 |
| 2020 | 12 | 23 | 8  | -0.5 | 20  | 0   | 20  | 1013 | 1.3  | 127 | 0.9 |
| 2020 | 12 | 23 | 9  | 1    | 85  | 190 | 128 | 1013 | 2.5  | 124 | 0.8 |
| 2020 | 12 | 23 | 10 | 0.9  | 119 | 442 | 281 | 1013 | 3.8  | 129 | 1.6 |
| 2020 | 12 | 23 | 11 | 1.2  | 188 | 319 | 336 | 1012 | 4.4  | 138 | 1.7 |
| 2020 | 12 | 23 | 12 | 1.6  | 226 | 258 | 359 | 1011 | 5.1  | 149 | 1.8 |
| 2020 | 12 | 23 | 13 | 1.8  | 217 | 321 | 383 | 1010 | 6    | 164 | 1.9 |
| 2020 | 12 | 23 | 14 | 2.5  | 191 | 316 | 339 | 1010 | 6    | 169 | 1.3 |
| 2020 | 12 | 23 | 15 | 3.2  | 119 | 596 | 341 | 1010 | 6    | 163 | 1   |
| 2020 | 12 | 23 | 16 | 1.7  | 82  | 451 | 188 | 1009 | 4.3  | 148 | 0.8 |
| 2020 | 12 | 23 | 17 | 0.9  | 26  | 141 | 36  | 1009 | 2.6  | 132 | 1.1 |
| 2020 | 12 | 23 | 18 | 0.7  | 0   | 0   | 0   | 1008 | 1.4  | 123 | 1.3 |
| 2020 | 12 | 23 | 19 | 0.7  | 0   | 0   | 0   | 1008 | 0.7  | 126 | 1.3 |
| 2020 | 12 | 23 | 20 | 0.7  | 0   | 0   | 0   | 1008 | 0.7  | 126 | 1.3 |
| 2020 | 12 | 23 | 21 | 1.4  | 0   | 0   | 0   | 1008 | 1.4  | 125 | 1.2 |
| 2020 | 12 | 23 | 22 | 1.7  | 0   | 0   | 0   | 1007 | 1.8  | 123 | 1.1 |
| 2020 | 12 | 23 | 23 | 2.1  | 0   | 0   | 0   | 1007 | 2.3  | 124 | 1   |
| 2020 | 12 | 24 | 0  | 2.3  | 0   | 0   | 0   | 1006 | 3    | 121 | 0.8 |
| 2020 | 12 | 24 | 1  | 2.5  | 0   | 0   | 0   | 1006 | 3.8  | 116 | 0.2 |
| 2020 | 12 | 24 | 2  | 2.5  | 0   | 0   | 0   | 1006 | 3.4  | 315 | 0.6 |
| 2020 | 12 | 24 | 3  | 2.2  | 0   | 0   | 0   | 1006 | 2.2  | 316 | 1.1 |
| 2020 | 12 | 24 | 4  | 2.2  | 0   | 0   | 0   | 1006 | 2.2  | 321 | 1.2 |
| 2020 | 12 | 24 | 5  | 2.3  | 0   | 0   | 0   | 1006 | 2.3  | 322 | 1.4 |
| 2020 | 12 | 24 | 6  | 2.4  | 0   | 0   | 0   | 1006 | 2.4  | 320 | 1.6 |
| 2020 | 12 | 24 | 7  | 2.2  | 0   | 0   | 0   | 1006 | 2.4  | 321 | 1.6 |
| 2020 | 12 | 24 | 8  | 2    | 18  | 0   | 18  | 1006 | 2.9  | 324 | 1.6 |
| 2020 | 12 | 24 | 9  | 3    | 87  | 141 | 118 | 1006 | 5.5  | 327 | 2.3 |
| 2020 | 12 | 24 | 10 | 2.6  | 141 | 475 | 314 | 1006 | 7.3  | 326 | 3.5 |
| 2020 | 12 | 24 | 11 | 1.2  | 142 | 651 | 443 | 1006 | 8.3  | 323 | 4.6 |
| 2020 | 12 | 24 | 12 | 0.6  | 130 | 758 | 522 | 1006 | 8.7  | 321 | 5.3 |
| 2020 | 12 | 24 | 13 | 0.3  | 130 | 766 | 527 | 1006 | 8.4  | 321 | 5.8 |
| 2020 | 12 | 24 | 14 | -0.3 | 120 | 741 | 468 | 1006 | 7.5  | 322 | 6   |
| 2020 | 12 | 24 | 15 | -1.3 | 107 | 655 | 352 | 1006 | 6.1  | 323 | 5.7 |
| 2020 | 12 | 24 | 16 | -1.8 | 78  | 516 | 201 | 1006 | 3.9  | 323 | 4.5 |
| 2020 | 12 | 24 | 17 | -2.5 | 29  | 172 | 41  | 1006 | 0.7  | 325 | 3.2 |
| 2020 | 12 | 24 | 18 | -2.8 | 0   | 0   | 0   | 1006 | -0.2 | 326 | 3   |
| 2020 | 12 | 24 | 19 | -2.9 | 0   | 0   | 0   | 1007 | -0.2 | 326 | 3   |
| 2020 | 12 | 24 | 20 | -2.8 | 0   | 0   | 0   | 1007 | -0.1 | 323 | 3   |
| 2020 | 12 | 24 | 21 | -3   | 0   | 0   | 0   | 1007 | -0.3 | 322 | 2.8 |
| 2020 | 12 | 24 | 22 | -2.9 | 0   | 0   | 0   | 1007 | -0.2 | 324 | 2.7 |
| 2020 | 12 | 24 | 23 | -2.9 | 0   | 0   | 0   | 1007 | 0.1  | 326 | 2.9 |
| 2020 | 12 | 25 | 0  | -2.8 | 0   | 0   | 0   | 1007 | 0.4  | 326 | 3.3 |
| 2020 | 12 | 25 | 1  | -2.7 | 0   | 0   | 0   | 1007 | 0.5  | 324 | 3.4 |
| 2020 | 12 | 25 | 2  | -2.5 | 0   | 0   | 0   | 1008 | 0.6  | 321 | 3.2 |
| 2020 | 12 | 25 | 3  | -2.2 | 0   | 0   | 0   | 1008 | 0.9  | 318 | 3.2 |
| 2020 | 12 | 25 | 4  | -1.9 | 0   | 0   | 0   | 1008 | 0.9  | 318 | 3.1 |
| 2020 | 12 | 25 | 5  | -1.8 | 0   | 0   | 0   | 1009 | 0.7  | 319 | 2.9 |

|      |    |    |    |      |     |     |     |      |      |     |     |
|------|----|----|----|------|-----|-----|-----|------|------|-----|-----|
| 2020 | 12 | 25 | 6  | -1.8 | 0   | 0   | 0   | 1009 | 0.6  | 324 | 2.8 |
| 2020 | 12 | 25 | 7  | -2   | 0   | 0   | 0   | 1010 | 0.1  | 330 | 2.6 |
| 2020 | 12 | 25 | 8  | -2   | 8   | 0   | 8   | 1011 | 0.9  | 336 | 3.1 |
| 2020 | 12 | 25 | 9  | -2.4 | 63  | 601 | 198 | 1011 | 2.3  | 338 | 4   |
| 2020 | 12 | 25 | 10 | -3.2 | 84  | 760 | 360 | 1012 | 3.3  | 333 | 4.4 |
| 2020 | 12 | 25 | 11 | -3.6 | 205 | 158 | 278 | 1011 | 4.1  | 328 | 4.7 |
| 2020 | 12 | 25 | 12 | -3.5 | 111 | 837 | 543 | 1011 | 4.7  | 327 | 4.8 |
| 2020 | 12 | 25 | 13 | -3.4 | 110 | 843 | 548 | 1011 | 4.9  | 325 | 4.8 |
| 2020 | 12 | 25 | 14 | -3.4 | 101 | 825 | 489 | 1011 | 4.9  | 325 | 4.6 |
| 2020 | 12 | 25 | 15 | -3.2 | 88  | 754 | 370 | 1011 | 4.4  | 326 | 4.1 |
| 2020 | 12 | 25 | 16 | -1.8 | 65  | 614 | 212 | 1011 | 2.5  | 330 | 2.1 |
| 2020 | 12 | 25 | 17 | -3.6 | 28  | 261 | 47  | 1011 | -1   | 337 | 1.3 |
| 2020 | 12 | 25 | 18 | -4   | 0   | 0   | 0   | 1012 | -1.1 | 341 | 1.3 |
| 2020 | 12 | 25 | 19 | -4.1 | 0   | 0   | 0   | 1012 | -0.9 | 342 | 1.2 |
| 2020 | 12 | 25 | 20 | -4.1 | 0   | 0   | 0   | 1012 | -0.6 | 339 | 1.1 |
| 2020 | 12 | 25 | 21 | -4.1 | 0   | 0   | 0   | 1012 | -0.6 | 333 | 1   |
| 2020 | 12 | 25 | 22 | -4.1 | 0   | 0   | 0   | 1012 | -0.4 | 329 | 0.9 |
| 2020 | 12 | 25 | 23 | -4.1 | 0   | 0   | 0   | 1013 | 0.1  | 323 | 0.8 |
| 2020 | 12 | 26 | 0  | -4   | 0   | 0   | 0   | 1013 | 0.2  | 326 | 0.7 |
| 2020 | 12 | 26 | 1  | -3.9 | 0   | 0   | 0   | 1013 | 0.2  | 340 | 0.7 |
| 2020 | 12 | 26 | 2  | -3.8 | 0   | 0   | 0   | 1013 | 0.5  | 329 | 0.5 |
| 2020 | 12 | 26 | 3  | -3.6 | 0   | 0   | 0   | 1014 | 0.6  | 281 | 0.4 |
| 2020 | 12 | 26 | 4  | -3.3 | 0   | 0   | 0   | 1013 | 0.5  | 284 | 0.4 |
| 2020 | 12 | 26 | 5  | -3.4 | 0   | 0   | 0   | 1013 | 0.7  | 307 | 0.4 |
| 2020 | 12 | 26 | 6  | -3.6 | 0   | 0   | 0   | 1013 | 0.8  | 321 | 0.4 |
| 2020 | 12 | 26 | 7  | -3.7 | 0   | 0   | 0   | 1014 | 0.8  | 311 | 0.2 |
| 2020 | 12 | 26 | 8  | -2.7 | 17  | 0   | 17  | 1014 | 1.2  | 220 | 0.1 |
| 2020 | 12 | 26 | 9  | -2.2 | 75  | 494 | 185 | 1015 | 2.2  | 178 | 0.4 |
| 2020 | 12 | 26 | 10 | -2.5 | 100 | 672 | 344 | 1015 | 4    | 226 | 0.9 |
| 2020 | 12 | 26 | 11 | -2.4 | 104 | 792 | 471 | 1014 | 5.8  | 251 | 1.3 |
| 2020 | 12 | 26 | 12 | -2.2 | 103 | 842 | 538 | 1013 | 7    | 260 | 1.4 |
| 2020 | 12 | 26 | 13 | -2   | 103 | 846 | 542 | 1012 | 7.6  | 263 | 1.5 |
| 2020 | 12 | 26 | 14 | -1.9 | 99  | 812 | 482 | 1011 | 7.6  | 269 | 1.5 |
| 2020 | 12 | 26 | 15 | -0.8 | 99  | 689 | 358 | 1011 | 7.1  | 283 | 1   |
| 2020 | 12 | 26 | 16 | -0.7 | 75  | 526 | 201 | 1011 | 5.2  | 297 | 0.7 |
| 2020 | 12 | 26 | 17 | -3.5 | 28  | 185 | 42  | 1011 | 4    | 323 | 0.7 |
| 2020 | 12 | 26 | 18 | -3.4 | 0   | 0   | 0   | 1011 | 3.8  | 30  | 0.7 |
| 2020 | 12 | 26 | 19 | -3   | 0   | 0   | 0   | 1011 | 2.8  | 82  | 0.9 |
| 2020 | 12 | 26 | 20 | -2.5 | 0   | 0   | 0   | 1011 | 1.9  | 107 | 1.1 |
| 2020 | 12 | 26 | 21 | -2.2 | 0   | 0   | 0   | 1011 | 1.2  | 118 | 1.2 |
| 2020 | 12 | 26 | 22 | -1.9 | 0   | 0   | 0   | 1011 | 0.9  | 122 | 1.2 |
| 2020 | 12 | 26 | 23 | -1.7 | 0   | 0   | 0   | 1010 | 0.9  | 127 | 1.3 |
| 2020 | 12 | 27 | 0  | -1.6 | 0   | 0   | 0   | 1010 | 0.9  | 130 | 1.3 |
| 2020 | 12 | 27 | 1  | -1.5 | 0   | 0   | 0   | 1010 | 1    | 131 | 1.3 |
| 2020 | 12 | 27 | 2  | -1.3 | 0   | 0   | 0   | 1010 | 1.1  | 128 | 1.3 |
| 2020 | 12 | 27 | 3  | -1.2 | 0   | 0   | 0   | 1010 | 1.2  | 124 | 1.3 |
| 2020 | 12 | 27 | 4  | -1.1 | 0   | 0   | 0   | 1010 | 1.3  | 118 | 1.3 |
| 2020 | 12 | 27 | 5  | -0.9 | 0   | 0   | 0   | 1010 | 1.4  | 113 | 1.4 |
| 2020 | 12 | 27 | 6  | -0.8 | 0   | 0   | 0   | 1010 | 1.5  | 108 | 1.5 |
| 2020 | 12 | 27 | 7  | -0.7 | 0   | 0   | 0   | 1010 | 1.5  | 105 | 1.6 |

|      |    |    |    |      |     |     |     |      |      |     |     |
|------|----|----|----|------|-----|-----|-----|------|------|-----|-----|
| 2020 | 12 | 27 | 8  | -0.2 | 6   | 0   | 6   | 1009 | 2.3  | 103 | 1.8 |
| 2020 | 12 | 27 | 9  | 0.3  | 29  | 0   | 29  | 1009 | 3.6  | 102 | 2.5 |
| 2020 | 12 | 27 | 10 | 0.8  | 89  | 0   | 89  | 1009 | 4.3  | 104 | 2.8 |
| 2020 | 12 | 27 | 11 | 1.6  | 202 | 87  | 242 | 1008 | 4.8  | 106 | 2.9 |
| 2020 | 12 | 27 | 12 | 2.4  | 69  | 0   | 69  | 1008 | 5    | 105 | 2.8 |
| 2020 | 12 | 27 | 13 | 3    | 174 | 5   | 177 | 1007 | 5    | 102 | 2.8 |
| 2020 | 12 | 27 | 14 | 3.1  | 142 | 0   | 142 | 1007 | 4.6  | 95  | 2.7 |
| 2020 | 12 | 27 | 15 | 2.9  | 47  | 0   | 47  | 1007 | 3.9  | 87  | 2.6 |
| 2020 | 12 | 27 | 16 | 2.2  | 42  | 0   | 42  | 1007 | 2.9  | 79  | 2.4 |
| 2020 | 12 | 27 | 17 | 1.6  | 13  | 0   | 13  | 1007 | 1.9  | 73  | 2.1 |
| 2020 | 12 | 27 | 18 | 1.3  | 0   | 0   | 0   | 1008 | 1.7  | 76  | 1.9 |
| 2020 | 12 | 27 | 19 | 1.1  | 0   | 0   | 0   | 1008 | 1.5  | 85  | 1.8 |
| 2020 | 12 | 27 | 20 | 1    | 0   | 0   | 0   | 1008 | 1.3  | 90  | 1.6 |
| 2020 | 12 | 27 | 21 | 0.8  | 0   | 0   | 0   | 1008 | 1    | 87  | 1.2 |
| 2020 | 12 | 27 | 22 | 0.7  | 0   | 0   | 0   | 1008 | 1    | 77  | 1.1 |
| 2020 | 12 | 27 | 23 | 0.4  | 0   | 0   | 0   | 1008 | 0.9  | 61  | 1   |
| 2020 | 12 | 28 | 0  | 0.2  | 0   | 0   | 0   | 1008 | 0.8  | 41  | 1.1 |
| 2020 | 12 | 28 | 1  | 0.1  | 0   | 0   | 0   | 1009 | 0.4  | 22  | 1.2 |
| 2020 | 12 | 28 | 2  | -0.1 | 0   | 0   | 0   | 1009 | -0.1 | 12  | 1.3 |
| 2020 | 12 | 28 | 3  | -0.5 | 0   | 0   | 0   | 1010 | -0.5 | 6   | 1.3 |
| 2020 | 12 | 28 | 4  | -0.5 | 0   | 0   | 0   | 1010 | -0.5 | 8   | 1.3 |
| 2020 | 12 | 28 | 5  | -0.5 | 0   | 0   | 0   | 1010 | -0.5 | 15  | 1.3 |
| 2020 | 12 | 28 | 6  | -0.5 | 0   | 0   | 0   | 1011 | -0.5 | 22  | 1.3 |
| 2020 | 12 | 28 | 7  | -0.3 | 0   | 0   | 0   | 1011 | -0.3 | 28  | 1.3 |
| 2020 | 12 | 28 | 8  | 1.6  | 22  | 149 | 30  | 1011 | 2.1  | 35  | 1.2 |
| 2020 | 12 | 28 | 9  | 3.8  | 68  | 533 | 186 | 1011 | 5.3  | 39  | 2.2 |
| 2020 | 12 | 28 | 10 | 5.4  | 90  | 712 | 348 | 1011 | 7.5  | 31  | 2.2 |
| 2020 | 12 | 28 | 11 | 6    | 101 | 801 | 472 | 1011 | 9.1  | 25  | 2.2 |
| 2020 | 12 | 28 | 12 | 6    | 96  | 868 | 545 | 1010 | 10.2 | 26  | 2.1 |
| 2020 | 12 | 28 | 13 | 5.7  | 94  | 875 | 550 | 1010 | 11   | 20  | 1.9 |
| 2020 | 12 | 28 | 14 | 5.3  | 90  | 844 | 491 | 1010 | 11.4 | 16  | 1.6 |
| 2020 | 12 | 28 | 15 | 5.2  | 81  | 775 | 375 | 1010 | 11.1 | 26  | 1.4 |
| 2020 | 12 | 28 | 16 | 6    | 63  | 629 | 217 | 1010 | 9    | 31  | 0.8 |
| 2020 | 12 | 28 | 17 | 3.5  | 28  | 289 | 51  | 1010 | 6    | 32  | 1.2 |
| 2020 | 12 | 28 | 18 | 3.2  | 0   | 0   | 0   | 1010 | 4.5  | 37  | 1.3 |
| 2020 | 12 | 28 | 19 | 2.9  | 0   | 0   | 0   | 1010 | 3.5  | 40  | 1.4 |
| 2020 | 12 | 28 | 20 | 2.6  | 0   | 0   | 0   | 1010 | 2.8  | 55  | 1.4 |
| 2020 | 12 | 28 | 21 | 2.4  | 0   | 0   | 0   | 1010 | 3    | 80  | 1.3 |
| 2020 | 12 | 28 | 22 | 2.3  | 0   | 0   | 0   | 1010 | 3.1  | 112 | 1.2 |
| 2020 | 12 | 28 | 23 | 2.4  | 0   | 0   | 0   | 1010 | 3    | 148 | 1.2 |
| 2020 | 12 | 29 | 0  | 2.6  | 0   | 0   | 0   | 1010 | 2.7  | 159 | 1.1 |
| 2020 | 12 | 29 | 1  | 2.9  | 0   | 0   | 0   | 1010 | 3.3  | 140 | 1   |
| 2020 | 12 | 29 | 2  | 2.8  | 0   | 0   | 0   | 1010 | 2.8  | 93  | 0.9 |
| 2020 | 12 | 29 | 3  | 2.4  | 0   | 0   | 0   | 1010 | 2.4  | 55  | 1.1 |
| 2020 | 12 | 29 | 4  | 1.3  | 0   | 0   | 0   | 1009 | 1.3  | 42  | 1.3 |
| 2020 | 12 | 29 | 5  | 0.9  | 0   | 0   | 0   | 1009 | 0.9  | 46  | 1.3 |
| 2020 | 12 | 29 | 6  | 0.9  | 0   | 0   | 0   | 1009 | 0.9  | 53  | 1.3 |
| 2020 | 12 | 29 | 7  | 1.6  | 0   | 0   | 0   | 1009 | 1.6  | 46  | 1.2 |
| 2020 | 12 | 29 | 8  | 2.3  | 11  | 0   | 11  | 1009 | 2.8  | 42  | 1   |
| 2020 | 12 | 29 | 9  | 3.5  | 52  | 0   | 52  | 1009 | 5.3  | 53  | 1.2 |

|      |    |    |    |      |     |     |     |      |      |     |     |
|------|----|----|----|------|-----|-----|-----|------|------|-----|-----|
| 2020 | 12 | 29 | 10 | 3.9  | 106 | 620 | 330 | 1008 | 7.7  | 45  | 1.5 |
| 2020 | 12 | 29 | 11 | 4.4  | 124 | 701 | 449 | 1007 | 9.9  | 2   | 1.1 |
| 2020 | 12 | 29 | 12 | 4.9  | 131 | 739 | 514 | 1005 | 10.8 | 329 | 1.8 |
| 2020 | 12 | 29 | 13 | 5.1  | 67  | 0   | 67  | 1004 | 10.4 | 331 | 3.1 |
| 2020 | 12 | 29 | 14 | 4.8  | 23  | 0   | 23  | 1004 | 8.9  | 337 | 4.3 |
| 2020 | 12 | 29 | 15 | 3.7  | 137 | 9   | 141 | 1004 | 6.7  | 344 | 5.4 |
| 2020 | 12 | 29 | 16 | 2.4  | 10  | 0   | 10  | 1004 | 4.7  | 345 | 6   |
| 2020 | 12 | 29 | 17 | 1.3  | 4   | 0   | 4   | 1005 | 3    | 344 | 6.6 |
| 2020 | 12 | 29 | 18 | -0.1 | 0   | 0   | 0   | 1006 | 1.3  | 345 | 6.8 |
| 2020 | 12 | 29 | 19 | -1.4 | 0   | 0   | 0   | 1006 | 0.3  | 345 | 6.8 |
| 2020 | 12 | 29 | 20 | -2.3 | 0   | 0   | 0   | 1007 | -0.4 | 344 | 6.7 |
| 2020 | 12 | 29 | 21 | -2.9 | 0   | 0   | 0   | 1007 | -0.9 | 342 | 6.7 |
| 2020 | 12 | 29 | 22 | -3.3 | 0   | 0   | 0   | 1007 | -1.2 | 341 | 6.7 |
| 2020 | 12 | 29 | 23 | -4.2 | 0   | 0   | 0   | 1007 | -1.6 | 338 | 6.9 |
| 2020 | 12 | 30 | 0  | -5.1 | 0   | 0   | 0   | 1007 | -2.1 | 336 | 6.8 |
| 2020 | 12 | 30 | 1  | -5.7 | 0   | 0   | 0   | 1007 | -2   | 331 | 6.8 |
| 2020 | 12 | 30 | 2  | -6.4 | 0   | 0   | 0   | 1007 | -2.1 | 328 | 7.4 |
| 2020 | 12 | 30 | 3  | -6.9 | 0   | 0   | 0   | 1007 | -2.5 | 326 | 8.1 |
| 2020 | 12 | 30 | 4  | -7.2 | 0   | 0   | 0   | 1007 | -2.9 | 326 | 8   |
| 2020 | 12 | 30 | 5  | -7.6 | 0   | 0   | 0   | 1007 | -3.4 | 324 | 8   |
| 2020 | 12 | 30 | 6  | -8   | 0   | 0   | 0   | 1008 | -3.9 | 323 | 7.8 |
| 2020 | 12 | 30 | 7  | -8.3 | 0   | 0   | 0   | 1008 | -4.2 | 323 | 7.6 |
| 2020 | 12 | 30 | 8  | -8.8 | 26  | 58  | 29  | 1009 | -4.4 | 322 | 7.5 |
| 2020 | 12 | 30 | 9  | -9.3 | 97  | 459 | 198 | 1008 | -4.1 | 321 | 7.8 |
| 2020 | 12 | 30 | 10 | -9.6 | 136 | 651 | 372 | 1008 | -4   | 321 | 8   |
| 2020 | 12 | 30 | 11 | -9.8 | 160 | 745 | 505 | 1008 | -3.8 | 320 | 8.1 |
| 2020 | 12 | 30 | 12 | -9.9 | 109 | 0   | 109 | 1008 | -3.6 | 319 | 8.1 |
| 2020 | 12 | 30 | 13 | -9.8 | 102 | 0   | 102 | 1007 | -3.5 | 319 | 7.9 |
| 2020 | 12 | 30 | 14 | -9.6 | 91  | 0   | 91  | 1007 | -3.8 | 320 | 7.6 |
| 2020 | 12 | 30 | 15 | -9.4 | 143 | 665 | 398 | 1008 | -3.8 | 321 | 7.4 |
| 2020 | 12 | 30 | 16 | -9.2 | 106 | 499 | 230 | 1009 | -4.2 | 322 | 7   |
| 2020 | 12 | 30 | 17 | -8.8 | 43  | 151 | 55  | 1009 | -4.5 | 325 | 6.3 |
| 2020 | 12 | 30 | 18 | -8.5 | 0   | 0   | 0   | 1010 | -4.5 | 328 | 6.1 |
| 2020 | 12 | 30 | 19 | -8.5 | 0   | 0   | 0   | 1010 | -4.6 | 331 | 6   |
| 2020 | 12 | 30 | 20 | -8.4 | 0   | 0   | 0   | 1011 | -4.7 | 333 | 5.8 |
| 2020 | 12 | 30 | 21 | -8.3 | 0   | 0   | 0   | 1011 | -4.6 | 336 | 5.7 |
| 2020 | 12 | 30 | 22 | -8.4 | 0   | 0   | 0   | 1011 | -4.8 | 339 | 5.4 |
| 2020 | 12 | 30 | 23 | -8.3 | 0   | 0   | 0   | 1012 | -4.9 | 342 | 5.1 |
| 2020 | 12 | 31 | 0  | -8.2 | 0   | 0   | 0   | 1012 | -4.7 | 343 | 4.9 |
| 2020 | 12 | 31 | 1  | -7.9 | 0   | 0   | 0   | 1012 | -4.4 | 344 | 4.6 |
| 2020 | 12 | 31 | 2  | -7.7 | 0   | 0   | 0   | 1012 | -4.2 | 345 | 4.7 |
| 2020 | 12 | 31 | 3  | -7.7 | 0   | 0   | 0   | 1012 | -4.3 | 349 | 4.7 |
| 2020 | 12 | 31 | 4  | -7.9 | 0   | 0   | 0   | 1012 | -4.5 | 353 | 4.4 |
| 2020 | 12 | 31 | 5  | -8.4 | 0   | 0   | 0   | 1013 | -5.2 | 357 | 4.1 |
| 2020 | 12 | 31 | 6  | -9.1 | 0   | 0   | 0   | 1013 | -6.1 | 0   | 3.7 |
| 2020 | 12 | 31 | 7  | -9.7 | 0   | 0   | 0   | 1014 | -6.9 | 2   | 3.2 |
| 2020 | 12 | 31 | 8  | -9.3 | 24  | 153 | 32  | 1014 | -6.2 | 358 | 3.1 |
| 2020 | 12 | 31 | 9  | -8.2 | 75  | 571 | 201 | 1014 | -4.6 | 347 | 3.2 |
| 2020 | 12 | 31 | 10 | -7.2 | 106 | 742 | 375 | 1014 | -3.3 | 332 | 3.4 |
| 2020 | 12 | 31 | 11 | -6.2 | 122 | 829 | 507 | 1013 | -1.6 | 319 | 4   |

|      |    |    |    |      |     |     |     |      |      |     |     |
|------|----|----|----|------|-----|-----|-----|------|------|-----|-----|
| 2020 | 12 | 31 | 12 | -5.4 | 128 | 873 | 582 | 1012 | -0.3 | 313 | 4.5 |
| 2020 | 12 | 31 | 13 | -4.6 | 139 | 843 | 581 | 1012 | 0.2  | 309 | 4.6 |
| 2020 | 12 | 31 | 14 | -3.9 | 140 | 791 | 519 | 1011 | 0.6  | 304 | 4.7 |
| 2020 | 12 | 31 | 15 | -3.4 | 140 | 658 | 393 | 1011 | 0.6  | 299 | 4.7 |
| 2020 | 12 | 31 | 16 | -3.4 | 89  | 290 | 161 | 1011 | 0.1  | 296 | 4.4 |
| 2020 | 12 | 31 | 17 | -4.2 | 30  | 67  | 35  | 1011 | -0.7 | 295 | 4.2 |
| 2020 | 12 | 31 | 18 | -4.7 | 0   | 0   | 0   | 1012 | -1.4 | 296 | 3.8 |
| 2020 | 12 | 31 | 19 | -4.8 | 0   | 0   | 0   | 1012 | -1.7 | 296 | 3.4 |
| 2020 | 12 | 31 | 20 | -4.6 | 0   | 0   | 0   | 1013 | -1.9 | 297 | 3.1 |
| 2020 | 12 | 31 | 21 | -4.2 | 0   | 0   | 0   | 1013 | -1.7 | 302 | 3.1 |
| 2020 | 12 | 31 | 22 | -3.7 | 0   | 0   | 0   | 1013 | -1.3 | 311 | 3.1 |
| 2020 | 12 | 31 | 23 | -3.6 | 0   | 0   | 0   | 1013 | -1.5 | 324 | 2.8 |
